# Supplementary material for: Daptomycin forms a stable complex with phosphatidylglycerol for selective uptake to bacterial membrane
Source: eLife. 2025 Jun 2;13:RP93267. doi: 10.7554/eLife.93267 (PMC12129450; doi:10.7554/eLife.93267)
Supplement: Figure 2—figure supplement 1—source data 1. [file elife-93267-fig2-figsupp1-data1.xlsx]

## Sheet: Multi Scans DAP KIN
Multi Scans DAP KIN
Labels	DAP 7 KIN	DAP 6 KIN	DAP 5 KIN	DAP 4 KIN	DAP 3 KIN	DAP 2 KIN	DAP 1 KIN
Type	Kinetic Scan	Kinetic Scan	Kinetic Scan	Kinetic Scan	Kinetic Scan	Kinetic Scan	Kinetic Scan
Comment
Start	0	0	0	0	0	0	0
Stop	600000000000	600000000000	600000000000	600000000000	600000000000	600000000000	600000000000
Step	1000000000	1000000000	1000000000	1000000000	1000000000	1000000000	1000000000
Fixed/Offset
XAxis	Time(ns)	Time(ns)	Time(ns)	Time(ns)	Time(ns)	Time(ns)	Time(ns)
YAxis	Counts	Counts	Counts	Counts	Counts	Counts	Counts
0	5868.89	6673.6	9060.11	10571.9	18204.1	29767.6	45796.5
1000000000	5900.49	6670.52	9194.72	10697.2	18678.9	30141.7	46194.9
2000000000	5900.2	6685.77	9345.29	10867.6	18888.2	30506.7	46472.1
3000000000	5875.56	6751.6	9457.09	11051.4	19102.6	30936	46987.7
4000000000	5919.51	6749.19	9567.28	11212.2	19252.1	31357.3	47377.2
5000000000	5934.6	6792.2	9736.21	11377.1	19475.9	31873.9	47940.7
6000000000	5944.2	6778.34	9853.75	11585.4	19793.2	32168.9	48260.2
7000000000	5953.26	6795.43	10057.1	11757	20053.7	32438.4	48519.7
8000000000	5925.39	6761.25	10136.8	11952.7	20352.6	32878.2	48975.2
9000000000	5975.11	6814.46	10235.5	12168.8	20583.3	33376.8	49531.5
10000000000	5940.01	6822.42	10408.7	12353.2	20970.4	33620.9	49724.2
11000000000	5980.34	6881.84	10555.2	12532.3	21275.8	33982.5	50243.8
12000000000	5973.66	6846.8	10761	12697.8	21591.8	34211.2	50676.4
13000000000	5996.59	6892.93	10796.5	13000	21989.5	34490.3	51029
14000000000	5960.4	6938.06	10977.1	13216.5	22255.3	34951.5	51320.8
15000000000	5975.79	6944.44	11061.5	13395.4	22640.9	35246.5	51913.4
16000000000	6004.03	6934.31	11295.7	13519.5	22946.4	35727.9	52564.6
17000000000	6084.01	6934.74	11429.6	13666.3	23322.6	35959.7	52945
18000000000	6021.65	7001.56	11615.5	13874.3	23508	36275	53500.5
19000000000	6047.6	7032.53	11702.6	14043.8	23848.5	36560.5	54429.4
20000000000	6061.31	6998.56	11906.2	14189.6	24170.2	36851.6	55228.2
21000000000	6084.27	7038.29	12000.6	14470.5	24505.3	37097.6	55847.8
22000000000	6099.21	7089.02	12116	14613.4	24751.9	37498.9	56647.7
23000000000	6091.4	7050.53	12277.2	14729	25078	37648.5	57380.2
24000000000	6109.83	7095.99	12419.5	14871.8	25422.2	37889.5	58156.7
25000000000	6152.47	7094.27	12607.6	15069.5	25724.8	38291	58942.9
26000000000	6169.59	7140.16	12666.4	15221.9	26064	38683.1	59618.9
27000000000	6085.49	7167.16	12773.6	15350	26391.3	39005.5	60496.3
28000000000	6148.7	7228.38	12945.2	15565.7	26541.5	39363.5	61041.8
29000000000	6164.02	7233.05	13012.8	15676.9	26800.6	39837.7	61913.5
30000000000	6099.27	7280.85	13178.5	15956.8	27080.5	40187.5	62514.2
31000000000	6126.09	7289.91	13311.8	16045.9	27514.9	40267.8	63161.3
32000000000	6113.8	7310.42	13350.4	16326	27664.4	41021.2	63898.4
33000000000	6102.57	7337.02	13493.8	16483.6	27968.6	41212	64374.9
34000000000	6082.78	7322.41	13681.5	16707.5	28220.3	41410.5	65074.5
35000000000	6089.1	7356.82	13788.4	16935.6	28368.2	41889.4	65626.2
36000000000	6097.04	7361.29	13889.2	17043.9	28606.9	42119.1	66208
37000000000	6079.12	7380.9	14018.9	17367	28880.9	42625.6	66646.6
38000000000	6111.54	7411.1	14072.2	17431.8	29145	43026.2	67189.6
39000000000	6143.11	7401.41	14213.8	17796.5	29340.4	43256.4	67719.5
40000000000	6158.5	7423.36	14310.4	17896.9	29575.8	43598.7	68193.6
41000000000	6150.79	7393.99	14436.6	18127.5	29836.1	44010.2	68570.3
42000000000	6148.96	7427.07	14622	18310.4	30190.9	44409.8	69269.1
43000000000	6181.31	7452.93	14595	18562.9	30283.7	44628.6	69332.7
44000000000	6199.86	7440.64	14739.7	18659.6	30586.9	44836.9	69908.5
45000000000	6190.22	7491.31	15002.4	18954.3	30706.3	45265.5	70338.9
46000000000	6170.4	7539.76	15038.2	19050	30880	45703.2	70787.5
47000000000	6225.28	7567.92	15210.3	19161.8	30990	45981.3	71315.7
48000000000	6220.96	7569.2	15299.9	19498.9	31335.7	46209.3	71687.7
49000000000	6180.63	7629.89	15454.2	19614.9	31469.1	46581.9	71909.1
50000000000	6198.97	7623.25	15448.3	19868.9	31730.6	46883.8	72258.5
51000000000	6217.44	7627.11	15647.5	20047.6	31922.8	47190.4	72973.6
52000000000	6234.59	7688.96	15733.3	20173.7	32135.1	47694	73102
53000000000	6216.03	7713.47	15763.4	20406.9	32332.7	47764.7	73660.1
54000000000	6238.22	7736.75	15989.8	20558	32498.2	48113	73893.2
55000000000	6245.3	7795.55	16053.3	20664.9	32538.7	48566.7	74102.3
56000000000	6276.39	7825.01	16185.3	20848.7	32921.9	48723.1	74784.7
57000000000	6291	7801.08	16287.2	20963.1	33097.7	48900.9	74850.3
58000000000	6217.05	7857.26	16282	21207.6	33168.1	49270.5	75202.7
59000000000	6252.99	7859.32	16497.7	21282.9	33358.7	49521.5	75456
60000000000	6241.21	7911.65	16566.3	21445.2	33582.5	49733.1	75693.8
61000000000	6254.59	7898.81	16588.6	21630	33906.7	50118.6	76021.6
62000000000	6219.13	7946.74	16783	21620.3	33938.4	50417.6	76404.1
63000000000	6264.36	7964	16892.4	21870.2	34162.4	50653.3	76770.6
64000000000	6304.35	8015.43	17068.5	22009	34391.4	50800.6	76874.1
65000000000	6274.24	8055.93	17130.4	22242.8	34515	51145.9	77041.5
66000000000	6334.34	8094.77	17319.8	22411.4	34804.7	51509.4	77471.6
67000000000	6355.52	8127.08	17294.2	22599	35006.8	51566	77684.8
68000000000	6296.6	8126.27	17451.5	22652.3	35083.8	52066.3	78102.3
69000000000	6283.18	8108.09	17434	22835.8	35310.6	52055.6	78291.4
70000000000	6305.94	8196.65	17633.9	23098.3	35494.3	52455.1	78390
71000000000	6377.96	8233.42	17683.4	23174.9	35758.6	52645.6	78742.9
72000000000	6321.43	8183.32	17747.2	23300.9	35809	52918.4	78865.8
73000000000	6368.36	8166.84	17845.6	23428.6	35956.6	53273.2	79277.9
74000000000	6328.32	8287.39	17838.5	23576	36208.5	53365.3	79454.8
75000000000	6327.92	8331.93	17928.5	23793.2	36432.9	53572.5	79690.2
76000000000	6340.91	8350.06	18096.2	23764.2	36619	53791.1	79958.1
77000000000	6320.65	8407.72	18086	23945.5	36666.6	53973	80211.2
78000000000	6345.73	8465.14	18216	24098.7	36725.8	54398.6	80431.2
79000000000	6349.76	8394.28	18381.5	24289.8	37125	54498.6	80452.1
80000000000	6348.14	8457.69	18446.1	24299.1	37267.5	54887.1	81106.5
81000000000	6319.15	8476.78	18541.6	24504.3	37453.1	54846.1	80956.3
82000000000	6441.26	8508.05	18551.1	24645.3	37542.9	55107.2	81337.4
83000000000	6360.79	8609.76	18671.8	24664.4	37696.7	55384.2	81288.3
84000000000	6373.87	8549.27	18765.1	24761.9	37802.7	55510.6	81454
85000000000	6385.13	8586.42	18838.8	24932.4	38097.5	55850.7	81766.1
86000000000	6447.8	8605.32	18993.4	25145.5	38278.2	55946.5	82033.5
87000000000	6445.41	8695.43	19038.4	25176.4	38494.2	56026.5	82072.2
88000000000	6424.74	8679.54	19110.8	25406.5	38494.4	56232.3	82137.9
89000000000	6443.65	8696.62	19127.6	25493.6	38667.2	56304.6	82516.6
90000000000	6456.43	8798.66	19236.2	25410.5	38829.5	56472	82724.8
91000000000	6436.45	8741.29	19314.9	25685.7	38890.1	56519.5	82868.1
92000000000	6450.88	8821.35	19513.7	25761.2	39174.3	56813.7	83184.9
93000000000	6461.89	8825.6	19532.4	25894.3	39413.6	56895.9	83254.4
94000000000	6484.75	8921.12	19600.1	26124.4	39394.2	56934.4	83419.3
95000000000	6515.82	8900.64	19767.9	26166.7	39516	57163.2	83820
96000000000	6512.72	8962.39	19813.1	26304.1	39786.2	57354.5	83981.5
97000000000	6460.02	8930.72	19907.1	26414.2	39826.7	57476.6	84092
98000000000	6467.4	8982.21	20022	26492.9	39936.3	57678	84418.5
99000000000	6475.32	9032.35	19995.2	26696.2	40098.9	57666.2	84574.8
100000000000	6522.6	9109.76	20176.2	26728.8	40366.2	57707.1	84945.7
101000000000	6487.33	9143.05	20241.8	26855.9	40429.6	57860.4	85207.6
102000000000	6521.07	9155.18	20272.2	27076.5	40553.5	58080.2	85213.9
103000000000	6510.62	9148.32	20321.5	27062.3	40718.4	58040.1	85362.5
104000000000	6517.87	9172.19	20448.9	27130.7	40835.3	58310	85515.8
105000000000	6535.44	9294.95	20613.2	27396.6	40967.9	58341.1	85984.9
106000000000	6530.23	9314.73	20528.5	27380.6	41182.5	58473.6	86027.8
107000000000	6522.66	9287.32	20584.6	27555.3	41107.6	58416.8	86489.5
108000000000	6530.67	9319.58	20696.1	27587.1	41325.6	58848.2	86457
109000000000	6574.93	9401.94	20804.3	27706.8	41523.2	58825.3	86923
110000000000	6561.49	9343.57	20902.6	27921.4	41735.4	58890.7	86764.6
111000000000	6549.84	9421.18	20983.9	27961	41813.2	58976	87126.3
112000000000	6600.49	9480.2	21082.5	28086.1	41953.9	59067.7	87236.5
113000000000	6592.47	9439.39	21071.8	28283.1	42128.6	59142.2	87552.8
114000000000	6576.71	9501.51	21185.1	28362.2	42227.3	59325.2	87596.7
115000000000	6614.19	9546.28	21221.8	28425.5	42407.5	59458.1	87890.1
116000000000	6565.6	9563.73	21349.7	28625.7	42534.8	59486.3	88310.2
117000000000	6603.95	9571.9	21357.6	28691	42593.1	59569.4	88509.7
118000000000	6622.03	9579.65	21376.5	28735.2	42586.7	59810	88601.2
119000000000	6634.07	9660.93	21506.3	28865.1	42783.3	59812.4	88955.6
120000000000	6606.42	9625.32	21568.3	28946.3	43017.8	59982.8	89120.6
121000000000	6634.48	9686.69	21631.2	28951.3	43107.2	59895.7	89321.4
122000000000	6633.61	9741.67	21650.5	29142.7	43144.3	60174.9	89416.2
123000000000	6645.32	9774.7	21725.7	29265.6	43260.4	60227.7	89705.3
124000000000	6591.82	9873.77	21839.5	29280.5	43483.7	60359.6	89709.7
125000000000	6658.91	9860.06	21848.6	29435.2	43535.6	60375.8	90007.3
126000000000	6656.5	9837.67	21981.4	29592.6	43597.5	60622.9	90248.1
127000000000	6714.25	9964.31	22073.4	29669.7	43761.5	60723	90351.7
128000000000	6705.55	9965.14	22060.6	29653.1	43902.6	60913.6	90583.2
129000000000	6704.94	10003.8	22168.7	29839.5	44012.1	60795.3	90786.4
130000000000	6694.32	10014.6	22177.1	29978.7	44162.5	61049.7	90831.9
131000000000	6743.78	10046.8	22291.8	30144.8	44163.7	61183	91094.3
132000000000	6730.4	10064	22356	30120.7	44299.2	61179.2	91333.2
133000000000	6740.69	10100.3	22409.8	30173.9	44462.2	61332.5	91168.1
134000000000	6731.13	10126.1	22428.5	30226.1	44584	61456.2	91713.6
135000000000	6830.05	10117.3	22497.9	30283.2	44656.4	61395.4	91759.1
136000000000	6792.26	10173.6	22601	30486.7	44764.9	61634.4	91757.6
137000000000	6745.85	10207.4	22601.6	30591.5	44944.9	61636.9	91947.6
138000000000	6802.9	10271.1	22742.2	30776.5	44963.4	61740.1	92347.1
139000000000	6819.55	10262.8	22914.3	30731.8	45100.4	61903.9	92307.5
140000000000	6797.19	10296.4	22922.4	30780.3	45100.8	62056.9	92550
141000000000	6826.82	10369.3	22869.8	30997.7	45315.7	62122.7	92622.5
142000000000	6845.84	10387.1	23002.3	30981.7	45390.2	62141.7	92799.7
143000000000	6826.99	10482	23111.6	31104	45524	62149	93099.8
144000000000	6826.68	10392.9	23169.2	31193.6	45579.7	62429.1	92944.5
145000000000	6770.41	10503.8	23192.9	31345	45600.6	62431.3	93308.7
146000000000	6774.28	10511.4	23247.2	31321.2	45596.1	62341.3	93226
147000000000	6875.3	10574.5	23274.2	31469.3	45626.6	62460.6	93512.2
148000000000	6829.48	10608.6	23403.8	31513.5	45761.2	62657.8	93568.7
149000000000	6892.75	10556.6	23333.4	31550.7	46155.7	62685.1	93918.6
150000000000	6816.84	10666.3	23541.7	31723.4	46038.2	62759.2	94008.1
151000000000	6812.39	10617.3	23556.9	31696.7	46245.2	62984	94328.8
152000000000	6790.19	10695.6	23637.9	31816.1	46190.8	63103.8	94419.8
153000000000	6874.1	10800	23792.7	31969.2	46446.1	63154.9	94544.1
154000000000	6901.31	10826.3	23814.3	31941	46399.7	63168	94598.6
155000000000	6911.99	10786.7	23921.7	32114.4	46457.6	63264.3	94930.7
156000000000	6884.19	10810.2	24009.7	32254.3	46606.1	63380.1	94999.5
157000000000	6866.64	10871.7	24154.5	32218.8	46608	63332.2	95062.5
158000000000	6854.52	10916.3	24219.6	32268.3	46736.6	63593	95362.8
159000000000	6919.94	10919	24221.1	32406.3	46681.6	63372.1	95459.1
160000000000	6905.63	10938.2	24322.9	32463.1	46908.5	63641.4	95951.3
161000000000	6936.53	10981.2	24458.3	32415.1	47109.2	63833.5	95995.9
162000000000	6885.31	11022.1	24526.1	32567.7	47117.1	63871.4	96214.4
163000000000	6964.64	11106.5	24561.7	32655.2	47194.4	63886.5	96199.8
164000000000	6930.86	11114	24641.6	32758.9	47121.4	64110.6	96282.9
165000000000	6917	11093.2	24737.6	32820.9	47200.7	64163.1	96368.3
166000000000	6996.9	11169.3	24776.3	33019.2	47296.5	64232.3	96719.9
167000000000	6922.6	11172.4	24936.4	32817.1	47312.5	64278.4	96951.5
168000000000	6974.99	11122.7	24960	32950.6	47533.1	64502.1	97205.9
169000000000	6966.75	11288.6	25002.6	33020	47441.3	64450.1	97185.5
170000000000	6979.07	11217.3	24952.1	33133.3	47548.4	64637	97336.4
171000000000	6985.65	11245.7	25111.6	33149.9	47683.3	64833.7	97349.9
172000000000	6921.91	11263.8	25188.9	33189	47743.7	64916.8	97774.5
173000000000	6972.57	11294	25177.1	33368.3	47786.7	65083.3	97832.3
174000000000	6979.35	11322.8	25250.3	33375.3	47849.7	65030.9	98027.5
175000000000	6981.35	11366.1	25172.4	33503.8	48015	64999.5	98197
176000000000	6971.81	11442.9	25179.8	33375.8	48172.2	65199.5	98288.9
177000000000	6991.82	11408.8	25228.8	33561.9	48338.4	65351.9	98579.6
178000000000	6969.69	11452.7	25290.6	33571.9	48242.7	65328	98537.2
179000000000	7008.04	11508.5	25455.8	33629.8	48380.8	65303.8	98985
180000000000	7043.98	11499.7	25467.1	33675.8	48478.6	65461.7	99225.4
181000000000	7011.81	11628.4	25434.6	33711.9	48529	65518.9	99079.9
182000000000	7013.1	11614	25446.4	33849.3	48467	65616.1	99083.5
183000000000	6981.64	11643.1	25509.5	33949.6	48602.9	65825.9	99357
184000000000	7041.18	11668.9	25652.6	34007.4	48590.4	65881.3	99375.5
185000000000	7062.55	11646.4	25684.5	34032.2	48875	65845.2	99466.1
186000000000	7108.39	11629.1	25743.1	34151.2	48807.1	65955.5	99804.2
187000000000	7098.03	11727.2	25783	34278.5	48912.1	65976.7	99921
188000000000	7093.21	11739	25831.5	34273.5	49058.7	66152.9	99936.3
189000000000	7033.76	11795	25797	34317.8	49128.8	66066.2	99985.7
190000000000	7121.27	11745.6	25840.2	34240.6	48992.6	66059	100080
191000000000	7057.78	11867	25958.7	34358.9	49194.8	66220.3	100364
192000000000	7070.64	11842	26071	34516.5	49310.6	66435.2	100203
193000000000	7114.98	11821.1	26126.9	34657.1	49232.1	66331.6	100467
194000000000	7126	11872.6	26131	34566.4	49268.2	66207	100578
195000000000	7098.29	11948	26265.4	34620.7	49437.5	66555.5	100729
196000000000	7117.22	11955.6	26280.2	34608.5	49527.9	66512.9	100936
197000000000	7174.54	11956.6	26186.7	34689.1	49626.7	66516.9	101205
198000000000	7140.93	11950.3	26354	34720.9	49545.6	66778.3	101065
199000000000	7141.52	12044.5	26321.9	34853.7	49766.6	66696.1	101035
200000000000	7162.48	12062.4	26455.8	34816.2	49730.4	66583.7	101271
201000000000	7073.06	12062.8	26474.6	34955.4	49747.1	66822.9	101213
202000000000	7160.88	12021.7	26539.9	34893.9	49959.4	66881.8	101131
203000000000	7133.31	12165.4	26545.3	34998.7	49971.1	66862.4	101576
204000000000	7125.65	12143.2	26601.5	35039.9	49950.4	67015.1	101472
205000000000	7157.61	12126.4	26681.5	35076	50053.3	67049.9	101661
206000000000	7175.16	12229	26724.5	35186.7	50066	67036.3	101782
207000000000	7230.81	12231.5	26770.3	35279.9	50203.1	67119.3	101815
208000000000	7249.94	12202.1	26871.9	35361.5	50172.3	67184.2	101899
209000000000	7199.77	12320.1	27008.3	35309.8	50313.3	67284.3	102064
210000000000	7207.6	12263.3	26862.9	35453.3	50209.9	67315.9	101947
211000000000	7214.96	12452.5	26984.9	35451.9	50211.8	67372.8	102139
212000000000	7213.95	12332.2	27050.3	35447.8	50340	67211.5	102275
213000000000	7208.73	12423.5	27079.9	35411.5	50283.3	67628.3	102438
214000000000	7188.69	12356.9	27187.1	35501.3	50576.7	67595.5	102380
215000000000	7241.34	12415.1	27265.1	35609.8	50424	67490.9	102570
216000000000	7196.23	12466.9	27198.6	35579.4	50538	67650.2	102709
217000000000	7191.11	12457.3	27320.1	35826.5	50549.3	67651.9	102830
218000000000	7241.73	12545.8	27330.2	35778.5	50569.3	67687.5	103079
219000000000	7217.43	12507.6	27309	35749.1	50730.6	67745.1	103071
220000000000	7286.51	12564.3	27423.3	35913.7	50738	67843.7	103115
221000000000	7262.09	12605	27530.4	36046	50820.7	67904.4	103025
222000000000	7257.55	12556.5	27470.4	35874.4	50841	67812.2	103202
223000000000	7304.32	12592.2	27564.7	35974.9	50930.4	68040.2	103220
224000000000	7308.21	12615.6	27605	36002.1	50950.3	68037.5	103172
225000000000	7303.96	12697.2	27588.3	36089.1	50992.6	68022.4	103369
226000000000	7253.09	12716.4	27577.5	36108	50904.2	68192.4	103548
227000000000	7287.2	12663.3	27709.4	36304.1	51104.3	68124.7	103582
228000000000	7245.49	12639.9	27777.5	36117.4	51092.5	68226.1	103548
229000000000	7269.5	12703.4	27798.9	36057.8	51006.1	68172.3	103856
230000000000	7258.51	12758.9	27777.4	36246.3	51175	68359.5	103765
231000000000	7347.21	12786.3	27960.7	36322	51161.7	68274.3	103974
232000000000	7352.49	12740	27893.4	36389.2	51110.5	68574.4	103945
233000000000	7261.62	12768.3	27977.7	36375.1	51126	68595.4	104107
234000000000	7307.92	12868.4	28061.6	36439.6	51331.9	68503.4	104204
235000000000	7381.78	12864.8	27998	36384.5	51495.6	68466.8	104034
236000000000	7334.37	12932.5	28074.8	36482.1	51391.8	68713	104375
237000000000	7342.64	12865.3	28129.9	36486.5	51433.4	68684.5	104429
238000000000	7372.63	12934.7	28083.7	36488.6	51497.6	68764	104503
239000000000	7324.83	12966.7	28153.2	36684.7	51311.9	68720	104430
240000000000	7396.07	12910	28220.4	36636.5	51441	68953.2	104584
241000000000	7332.64	13000.9	28311.7	36723.1	51609.2	68928.2	104790
242000000000	7331.12	13083	28267.5	36616.3	51426.5	68942.4	104731
243000000000	7452.04	13024.2	28427.6	36663.1	51644.6	68988.3	105017
244000000000	7430.41	13032.4	28426.5	36778.4	51563.8	69121.8	105008
245000000000	7437.82	13025.6	28549.5	36972.4	51713.3	69027.3	104901
246000000000	7458.99	13068.7	28378.4	36744.9	51672	69286.4	105091
247000000000	7386.17	13099.6	28557.7	36904.1	51814.1	69324.1	105268
248000000000	7427.91	13100.6	28523.2	36924.6	51676.4	69373	105037
249000000000	7409	13082.6	28671.5	36980.3	51824.5	69302.2	105268
250000000000	7354.96	13133.9	28700.2	37000.7	51767.9	69636.1	105389
251000000000	7414.15	13208.2	28675.3	37102.8	51817.9	69571.8	105324
252000000000	7373.46	13185.8	28729.6	37100.8	51949.9	69489.8	105500
253000000000	7449.21	13195.9	28680.4	37095.1	51993.6	69823.7	105801
254000000000	7416.16	13227.8	28729.1	37186.8	51958.9	69853.9	105702
255000000000	7445.27	13226.6	28827	37171.7	52080.1	69779.5	105875
256000000000	7499.38	13346.9	28827.6	37309.2	52007.7	69697.6	105931
257000000000	7482.86	13290.8	28873.8	37243.9	52005.6	70091.6	106086
258000000000	7499.5	13289.3	29018.8	37452.6	52115.1	69954.8	106210
259000000000	7512.28	13266.5	28952.2	37403.7	52286.7	70076.4	106227
260000000000	7529.08	13298.4	28988.1	37368	52067.6	70069.9	106158
261000000000	7494.97	13348.9	29057.2	37416	52368	70190.8	106136
262000000000	7542.36	13302.7	29014.8	37418.3	52258.8	70274	106405
263000000000	7484.89	13416.8	29049.9	37538.4	52346	70136.7	106638
264000000000	7518.94	13475.4	29159.5	37557.1	52400.1	70256.7	106560
265000000000	7497.25	13376.4	29214.3	37612.9	52547.7	70401.7	106559
266000000000	7528.53	13538.2	29194	37661.2	52395.3	70368.2	106675
267000000000	7514.44	13521.3	29236.6	37746.4	52372.2	70543.9	106927
268000000000	7544.15	13568.2	29338.6	37711.3	52588.4	70461.1	106866
269000000000	7553.51	13498.3	29303	37824.2	52621.8	70372.7	106936
270000000000	7530.43	13572.6	29274.4	37849.6	52633.4	70519.3	106941
271000000000	7520.47	13592.6	29451.6	37786.8	52511	70799	107025
272000000000	7488.72	13555.8	29361.3	37933.8	52622.3	70700.4	107139
273000000000	7576.65	13543.3	29462.9	37822.7	52648.6	70836	107320
274000000000	7548.24	13632	29635.8	38065.7	52742.4	70786.4	107326
275000000000	7629.58	13621.3	29601.2	37880.9	52728.4	70821.5	107696
276000000000	7626.42	13578.2	29552.6	37984.5	52745	70862.7	107565
277000000000	7632.68	13683.5	29597.9	38020.6	52842.8	70986.1	107597
278000000000	7602.29	13644.7	29587.5	38083.7	52874.6	70969.7	107723
279000000000	7605.41	13627.9	29726.4	37933.4	52998.8	71064.3	107778
280000000000	7629.51	13685.2	29636.5	38197.9	52938.9	71025.3	107845
281000000000	7701.54	13724.1	29809.9	38032.2	52971	71222	107793
282000000000	7643.91	13763.7	29725.6	38201.6	53072.6	71246.3	107998
283000000000	7644.25	13823.6	29723.7	38111.4	53081.1	71269.6	108000
284000000000	7687.78	13835.4	29826.4	38229.3	52896.7	71571.6	108149
285000000000	7583.12	13816.8	29734.6	38252.1	53052.4	71522.2	108187
286000000000	7624.32	13771.4	29957.4	38283.1	53086.7	71562.1	108075
287000000000	7665.9	13791	29965.3	38288.1	53213.4	71634.1	108428
288000000000	7744.2	13908.1	29950	38300.6	53121.6	71580.5	108116
289000000000	7670.3	13867.2	29866.7	38466.1	53268	71498.4	108397
290000000000	7666.76	13860.7	30059.4	38281.6	53385.9	71584.8	108545
291000000000	7655.21	13901	30145.6	38391.3	53469.8	71785.9	108345
292000000000	7655.98	13837.1	30137.6	38436.6	53333.8	71754.3	108721
293000000000	7681.93	13955.8	30135.3	38410.6	53340.1	71574	108615
294000000000	7712.12	14041.2	30206.3	38642.1	53484.7	71615.3	108721
295000000000	7685.89	14002.7	30187	38497.5	53288.5	71909	108794
296000000000	7682.48	13973.7	30266.5	38579.9	53487.4	71943	108814
297000000000	7738.03	13940.8	30137.2	38571.7	53448.1	71908.3	108748
298000000000	7738.61	14038	30134.1	38646.1	53478.3	72030.1	108819
299000000000	7726.49	13993.8	30209.4	38585.9	53499.3	72138.2	108894
300000000000	7738.7	14077.3	30377.5	38508.3	53471.1	71988.5	109092
301000000000	7751.65	14127.6	30260.1	38516.6	53550.6	72299.3	109300
302000000000	7748.16	14070	30281.8	38747.1	53621.4	72285.6	109067
303000000000	7738.46	14073.9	30353.7	38855.7	53699.7	72299.5	109035
304000000000	7732.42	14135.8	30528.6	38731.4	53736.2	72338.8	109413
305000000000	7752.05	14077.2	30466.8	38894.1	53671	72528.4	109271
306000000000	7819.11	14133.6	30437.1	38897.3	53790.5	72348	109333
307000000000	7737.07	14213.8	30444.2	38796.4	53716.5	72436.1	109244
308000000000	7759.81	14186.5	30460.5	38792.7	53875.1	72401.6	109477
309000000000	7808.9	14177	30515.2	38815.9	53857.3	72373.2	109480
310000000000	7708.9	14204.8	30523.3	38840	53800.3	72651.8	109590
311000000000	7779.61	14158.8	30583.5	38952.2	53867.2	72652.6	109783
312000000000	7849.57	14218.2	30622.2	38917.2	53989.4	72925.7	109592
313000000000	7758.39	14218.4	30679.6	38994.7	53947.1	72656.1	109806
314000000000	7783.27	14361	30553.5	39067.4	53980.2	72759.5	109853
315000000000	7822.59	14282.3	30706.9	38964.2	53853.5	73058.6	110103
316000000000	7821.63	14307.5	30648.2	39124.5	54024.8	72996.1	110125
317000000000	7785.83	14247.5	30750.5	39176.3	53857.2	73054.5	110152
318000000000	7775.45	14304.5	30820.8	39111	54121.8	73192.8	110131
319000000000	7805.19	14253.5	30771.9	39096.6	54116.9	73261.1	110265
320000000000	7824.63	14399.4	30887.1	39145.6	54052.6	73090.3	110030
321000000000	7866.64	14385.5	30870.7	39101.9	54109.3	73388.8	109991
322000000000	7831.41	14438	30834.7	39271.8	54236.7	73297.2	110181
323000000000	7886.95	14380.6	30761.8	39240.4	54107.3	73368.2	110485
324000000000	7862.12	14441.3	30859.9	39295.3	54162.9	73202.1	110290
325000000000	7882.77	14386.7	31006.5	39368.1	54235.5	73444.4	110291
326000000000	7872.5	14512.2	31084.4	39317.6	54361.9	73367.4	110430
327000000000	7843.92	14365.8	31072	39317.5	54216.2	73496	110298
328000000000	7868.46	14396.8	31041.6	39399.4	54354.8	73749.5	110338
329000000000	7851.05	14447.5	31074.9	39320.1	54386	73539	110624
330000000000	7907.37	14482	31066.1	39460.7	54462.7	73510.9	110432
331000000000	7902.4	14529.3	31068.9	39428.1	54434.9	73775	110689
332000000000	7912.66	14550.9	31203.4	39394.4	54427	73691.2	110594
333000000000	7901.85	14485.7	31072.2	39421.1	54400.3	73592.2	110684
334000000000	7904.15	14560.4	31273.6	39680.7	54584.7	73902.1	110730
335000000000	7892.95	14482.1	31117.8	39537	54420.3	73974	110735
336000000000	7941.85	14573.6	31198	39552.1	54536.9	74018	110933
337000000000	7911.26	14579.3	31276.4	39581.3	54695.4	74093.1	110944
338000000000	7959.09	14535.8	31240.7	39548.7	54617.1	74060.5	110675
339000000000	7936.83	14636.2	31329.9	39602.6	54489.3	74188.8	110766
340000000000	7950.16	14628.8	31196.3	39596.2	54494.2	74145.1	110805
341000000000	7977.93	14569	31293.6	39585.8	54536.9	73889.4	111061
342000000000	8004.46	14727.4	31324.9	39703.1	54594.9	74267.7	110934
343000000000	8009.03	14619.9	31345.1	39723.6	54659.5	74228.1	110912
344000000000	7955.23	14673	31483.1	39681.2	54680.8	74293.3	111299
345000000000	7916.37	14668.3	31371	39700.5	54736.9	74473.7	111236
346000000000	8020.94	14667	31478.4	39707.2	54768.4	74431	111458
347000000000	7972.54	14591.6	31400.7	39697.6	55007.9	74328.1	111179
348000000000	7939.32	14718.4	31519.9	39876.8	54897.5	74613.1	111601
349000000000	8006.05	14755.1	31566.9	39784.7	54767.5	74481.8	111222
350000000000	7942.04	14779.3	31459.1	39793.9	54852	74505.7	111348
351000000000	8057.06	14688.5	31617.3	39835.2	54874.4	74633	111506
352000000000	7972.87	14792	31502.8	39959.6	54902.1	74576.5	111404
353000000000	8003.58	14785.1	31598.5	39879.5	54908.2	74620.9	111382
354000000000	7957.45	14732.4	31495.6	39868.3	55002	74792.5	111516
355000000000	7998.85	14768.3	31635.7	39824	54924.5	74716.4	111451
356000000000	8046.37	14792.8	31591.7	39968	55087.4	74721.3	111473
357000000000	8028.78	14861.5	31568.4	39869.9	54961.5	74778.4	111644
358000000000	8063.89	14836.4	31683.7	39922.6	55036.8	75032.8	111494
359000000000	8050	14852.3	31696.8	39916	55170.5	74955.4	111545
360000000000	8021.04	14934.8	31811.4	40015.4	55221.7	74942.4	111860
361000000000	8044.35	14834.1	31765.8	40053.3	55324.5	74932.4	111670
362000000000	8015.59	14878.5	31745	40081.8	55151.9	75229.8	111707
363000000000	8074.41	14915.7	31815.4	40085.6	55384	75118.3	111678
364000000000	8051.42	14947.7	31907.1	40139.5	55246.8	75259.9	111612
365000000000	8043.52	15007.4	31894.6	40115.9	55323	75232.7	111776
366000000000	8067.73	14974.7	31823.2	40071.1	55238.3	75366.2	111832
367000000000	8069.32	14952.8	31861.1	40238.3	55330.9	75211.2	111802
368000000000	8035.96	14872.5	31845.9	40194.2	55297.2	75232.4	111699
369000000000	8039.57	14981.3	31955.7	40133.4	55462.8	75301.4	111847
370000000000	8040.11	14999.6	31972	40269.8	55321.6	75338.9	111629
371000000000	8080.61	14909.2	32000.2	40277.9	55410.8	75276.3	112029
372000000000	8085.45	14979.3	32060.2	40277.4	55339.3	75361.4	111956
373000000000	8102.6	14937.1	31973.1	40233.3	55608.8	75299.7	111984
374000000000	8034.91	15096.6	32094.2	40242.3	55649.9	75341.8	112015
375000000000	8051.97	14958.9	32000.5	40406.1	55646.4	75427.6	112141
376000000000	8138.74	15016	32007.8	40391.9	55644.5	75558.6	112052
377000000000	8093.08	15088.6	32110.2	40332.1	55660.1	75788.3	111942
378000000000	8066.85	14990.5	32056.4	40450.9	55543.4	75678.7	112077
379000000000	8088.98	15064.3	32077.5	40364	55770.5	75686.7	112125
380000000000	8129.59	15111.4	32029.4	40527.1	55773.9	75858.7	112364
381000000000	8156.93	15026.7	32055	40410.7	55752	75820.5	112335
382000000000	8124.7	15029.3	32095.9	40417.2	55725.2	75804.2	112332
383000000000	8144.54	15062.4	32259.1	40476.8	55909.5	75929.3	112156
384000000000	8129.91	15084.7	32267.3	40467.2	55854.2	76022.8	112433
385000000000	8120.98	15146.8	32050.2	40503.1	55833	76040.8	112289
386000000000	8132.67	15171.7	32130.4	40500.5	55860.5	76043.9	112381
387000000000	8170.37	15227.4	32232.2	40648.8	55906.8	75840.9	112541
388000000000	8140.69	15125.9	32279.2	40572.8	55895.2	76050.7	112328
389000000000	8129.78	15216.6	32349.8	40577.8	55764.5	76074.9	112627
390000000000	8236.55	15131.3	32167.7	40628.3	55992.5	76239	112548
391000000000	8159.46	15214	32327.9	40625.8	56041.6	76334.1	112543
392000000000	8110.56	15206.1	32265.7	40571.7	56067.8	76207.2	112685
393000000000	8222.56	15221.7	32316.7	40701.2	55973.3	76223.5	112516
394000000000	8239.99	15241.1	32350.2	40736.5	56030.5	76287.4	112611
395000000000	8207.84	15199	32388.4	40686.4	56059.9	76292.6	112508
396000000000	8155.18	15266.8	32389.8	40670	56036.9	76358	112714
397000000000	8213.7	15237.1	32406.5	40754.9	56078.4	76453.3	112803
398000000000	8221.15	15311.8	32409.2	40772.9	55983.4	76445.7	112527
399000000000	8231.31	15242.2	32498.9	40867.4	56141.9	76372.6	112718
400000000000	8235.81	15207.8	32507.6	40747.6	56171.7	76573.9	112684
401000000000	8231.03	15302.9	32558.2	40713.4	56320.7	76561.9	112735
402000000000	8201.89	15281.6	32573.4	40782.1	56177.6	76612.7	113112
403000000000	8234.42	15278.8	32470.2	40776.5	56354.8	76735.4	112739
404000000000	8198.37	15400.6	32536.2	40856.3	56216.9	76676.5	112994
405000000000	8211.75	15249.9	32669.7	40872.4	56294.3	76589.5	112973
406000000000	8225.32	15305.3	32560.6	40926.9	56327.4	76611.6	112967
407000000000	8249.27	15393.1	32654.6	40772	56245.3	76772.7	112889
408000000000	8241.85	15267.3	32686	40899	56405.3	76908	112980
409000000000	8260.08	15325	32575.7	40927.1	56329.3	76758.1	113143
410000000000	8266.68	15332.3	32617.8	40873.1	56388.3	76891	113061
411000000000	8265.15	15372.5	32625.6	40747.9	56551.9	77078.3	113194
412000000000	8227.03	15402.8	32734.3	40837.4	56403.9	76937.6	113080
413000000000	8278.87	15360.9	32699.3	40992	56456.1	76951.8	113120
414000000000	8306.49	15373.2	32590.2	40900.6	56673.4	77031.3	113240
415000000000	8262.21	15375.7	32818.3	41039.2	56645.2	77090.6	113076
416000000000	8317.06	15388.2	32776.5	40887.2	56560.2	77045.2	112985
417000000000	8247.25	15429.1	32700.1	41017.4	56556.7	77090.2	113191
418000000000	8309.66	15484.3	32656.5	41071.2	56520.8	77051.5	113365
419000000000	8273.21	15378.6	32780	41108.8	56512	77358.5	113283
420000000000	8237.49	15461.7	32779.1	41087.7	56726.5	77195.8	113378
421000000000	8274.22	15401.6	32758.2	41148.8	56700.6	77390.1	113236
422000000000	8342.2	15418	32942	41103.7	56747.4	77227.3	113255
423000000000	8293.19	15528.9	32833.2	41072.4	56627.3	77338.1	113330
424000000000	8308.88	15531.2	32877	41155.9	56813.4	77550.4	113651
425000000000	8326.32	15483	32787.8	41203	56673.2	77623.4	113424
426000000000	8314.28	15538.1	32739.2	41223.7	56751.6	77566.7	113414
427000000000	8342.77	15473.6	32920.1	41229.7	56939	77664.7	113463
428000000000	8285.21	15492.8	32862.3	41172.6	56783.1	77491.1	113530
429000000000	8356.34	15557.6	32942.9	41079.6	56868.7	77719.3	113689
430000000000	8335.78	15598.7	32859.6	41326.4	56997.5	77569.1	113535
431000000000	8368.18	15476.9	32882.4	41098.5	56865	77550.5	113604
432000000000	8351.88	15599.4	32814.5	41098.1	56870.3	77686.6	113741
433000000000	8377.12	15618.6	33098.1	41206.6	57110.9	77853.3	113767
434000000000	8337.49	15625	32981.4	41404.4	56890.5	77693.4	113633
435000000000	8373.54	15616.7	33000.8	41312.3	57028.2	77906	113597
436000000000	8344.98	15538.7	33016.4	41220.3	56988.8	77717.1	113671
437000000000	8273.25	15636.7	33020.6	41289.4	57062.5	78007.1	113838
438000000000	8330.87	15568.4	33017.3	41254	57205.4	77983.6	113831
439000000000	8395.49	15666.3	33019.6	41280.7	56970.8	77697.7	113775
440000000000	8293.82	15653	33106.6	41298.6	57032.6	78019.8	113880
441000000000	8267.4	15511.1	33197.8	41322.8	57136	78026.4	113714
442000000000	8283.78	15558.3	33063.1	41329.3	57261.5	78068.3	114093
443000000000	8351.04	15648.3	33027.1	41433.6	57012.3	77901.7	114070
444000000000	8338.74	15672.5	33205.5	41381.9	57312.5	78151.7	114041
445000000000	8395.96	15647.4	33081.5	41485.4	57302.3	78062.8	113950
446000000000	8335.47	15663.6	33119.9	41315.2	57138.2	78243.5	114192
447000000000	8394.62	15579.6	33164.9	41488.6	57189.2	78016.7	114104
448000000000	8398.82	15661.6	33106.4	41562.6	57354.1	78275.2	114003
449000000000	8451.64	15723.5	33091.9	41441.5	57333.4	78310.7	114062
450000000000	8378.23	15664	33127.2	41476.6	57263.8	78291.4	114159
451000000000	8394.74	15760.7	33312.4	41529.9	57294.2	78422.8	114198
452000000000	8416.32	15726.5	33271.5	41399.3	57286.3	78367.9	114464
453000000000	8402.42	15747.3	33233.5	41611.9	57330.9	78298.6	114243
454000000000	8391.08	15764.5	33261.7	41388.4	57344.6	78240.8	114319
455000000000	8373.16	15666.8	33275.5	41428.1	57394.2	78405.2	114211
456000000000	8377.01	15601.5	33222.4	41508.7	57514.7	78439.2	114234
457000000000	8441.64	15812.7	33284	41575.8	57554.1	78578.4	114331
458000000000	8437.41	15797.7	33286.4	41551.7	57589.4	78426.2	114088
459000000000	8441.26	15798.1	33205.4	41659.7	57514.6	78549.1	114234
460000000000	8415.98	15766.5	33274.1	41413.2	57406.5	78613.1	114578
461000000000	8424.52	15755	33350.4	41636.3	57558.3	78542.2	114341
462000000000	8448.91	15853.7	33363	41468.2	57629.7	78557.1	114497
463000000000	8435.17	15816.1	33324	41629.7	57495	78600	114452
464000000000	8457.57	15785.4	33417.1	41601.2	57705.6	78791.8	114412
465000000000	8486.03	15765.4	33373.2	41555.8	57669.6	78673.7	114405
466000000000	8489.87	15911.3	33355.1	41714.3	57593.2	78799.4	114456
467000000000	8460.66	15850.7	33365.5	41569.4	57696	78659.7	114350
468000000000	8488.61	15783.4	33350.4	41650.9	57670	78659.5	114580
469000000000	8422.82	15886.4	33467.8	41593.6	57790.8	78613	114428
470000000000	8511.76	15840.2	33331.9	41727.4	57880.2	78931.8	114508
471000000000	8460.59	15810.3	33299.4	41604.4	57808.2	78823.7	114261
472000000000	8503.08	15904.4	33401.2	41589.8	57986.8	78863.4	114436
473000000000	8525.36	15843.5	33475.3	41614.2	57813	78991.2	114525
474000000000	8494.98	15840.2	33427.9	41637.3	57771	78930.2	114619
475000000000	8455	15829.1	33434.2	41698.7	57906.2	79025.3	114451
476000000000	8562.53	15872.7	33559.5	41674	58067.1	79010.2	114736
477000000000	8516	15906.8	33516.5	41793.5	57802.9	79008.5	114501
478000000000	8498.09	15925.8	33542.6	41830	57907.2	79196.6	114521
479000000000	8560.81	15885.4	33697.9	41779.2	58073.3	79187	114580
480000000000	8508.92	15890.7	33523.7	41708.4	58055.2	79126.6	114965
481000000000	8477.16	15962.3	33511.3	41939.2	57769.2	79310.9	114737
482000000000	8539.56	15943.1	33661.5	41768.3	57870.9	79204.2	114831
483000000000	8485.78	15967.5	33601.6	41621.8	58127.6	79230.6	114561
484000000000	8538.3	15960.2	33623.8	41875.9	57951.6	79362.6	114743
485000000000	8519.14	15956.6	33609.8	41808.9	57952.1	79337.9	114718
486000000000	8504.76	15915.7	33646.8	41720	58068.6	79342	114788
487000000000	8501.1	15933.4	33704.8	41762.4	57905.2	79355.2	114710
488000000000	8551.54	15936.2	33650.5	41786.1	58086	79402.8	114767
489000000000	8565.98	15928	33659	41805.6	57962.8	79570.2	114881
490000000000	8540.91	15950.3	33573.2	41822.4	58209.8	79501.5	114875
491000000000	8553.56	15955.1	33562.3	41862	58109.4	79493.8	114723
492000000000	8557.67	15957.6	33717.9	41907.6	58140.3	79490.8	115030
493000000000	8562.63	15998.5	33649.3	41896.8	58269.4	79648.1	114837
494000000000	8498.55	16007.2	33639.6	41910.4	58208.9	79520.6	114673
495000000000	8567.66	15957.6	33680.9	41876.2	58105.4	79437.8	114907
496000000000	8575.12	16063.3	33764.3	41639.6	58288.9	79486.1	114969
497000000000	8557.2	15968.3	33653.4	41885.7	58227.2	79703.8	114880
498000000000	8576.24	15914.3	33845.3	41865.5	58241.9	79696.7	114770
499000000000	8615.77	16021.2	33835.6	41862.7	58216.2	79795.9	114830
500000000000	8574.91	16063.4	33709.7	41960.8	58335.5	79711.4	115201
501000000000	8569.38	16010.1	33836.4	42004.2	58335.4	79851.7	114862
502000000000	8649.13	16058.8	33823.4	42032.1	58303.3	79807.6	115002
503000000000	8561.96	16052.1	33735.8	41966.3	58344.3	80012.6	114926
504000000000	8588.5	15965.7	33775.6	41965.9	58284.6	80013	114997
505000000000	8597.57	16019.4	33818.8	41860.9	58332.5	79929.6	115152
506000000000	8614.76	16148.5	33854.1	42009.5	58345.6	79776.4	114898
507000000000	8551.06	16042.2	33856.7	41973.5	58229	79864.1	115041
508000000000	8604.56	16034.8	33768.6	42090	58472.8	80086.6	114839
509000000000	8625	16090.1	33785	41963.4	58681.7	79978.6	115008
510000000000	8556.35	16109.5	33947.6	42015.9	58428.9	79978.1	115241
511000000000	8646.48	16088.7	33809.6	42124.1	58376.7	80018.4	115079
512000000000	8589.53	16064.5	33870	41979.2	58264.9	80034.7	115051
513000000000	8656.52	16063.3	33925.5	41959.2	58539.2	80053	114912
514000000000	8617.85	16094.2	33942.4	42094.1	58511.9	80110.1	115280
515000000000	8622.03	16035.3	33926.8	42142.7	58591.8	79971.5	115052
516000000000	8644.14	16090.6	33875.4	42114.4	58636.9	80358.1	115018
517000000000	8628.66	16065	33848.8	41972.7	58519.3	80296.2	115199
518000000000	8649.13	16213.6	33990.6	42054	58532.7	80309	114941
519000000000	8621.86	16047.3	33904.3	42151.5	58642.2	80332.1	115309
520000000000	8620.94	16127.1	34057.7	42188.9	58660.7	80369.9	115343
521000000000	8605.5	16092.8	33956.5	42126.8	58872.6	80296.3	115011
522000000000	8668.6	16145.5	33986	42067.6	58693.8	80202	115201
523000000000	8609.3	16128.2	33962.7	42089.8	58723.8	80209.7	115533
524000000000	8610.21	16083.9	33859.1	42309.8	58729.9	80382.3	115205
525000000000	8660.32	16128.4	34124.1	42168	58835.1	80509.5	115075
526000000000	8654.21	16158.8	33982.6	42223.9	58752.7	80459.8	115502
527000000000	8731.31	16224.8	33987.5	42227.8	58561.8	80459	115266
528000000000	8638	16200.2	33964.3	42149.1	58805.6	80644.4	115330
529000000000	8720.49	16216.9	33916.9	42334.2	58770.2	80521.4	115371
530000000000	8713.25	16226.6	34004.8	42083.1	58804.8	80477.3	115166
531000000000	8651.67	16119.6	34030.6	42199.6	58721.1	80628.6	115310
532000000000	8711.67	16191.5	33996.6	42282.9	58852.3	80589.3	115386
533000000000	8715.68	16194.9	34058.5	42273.3	58927.3	80557.2	115564
534000000000	8687.04	16230.2	34164.6	42180.1	58700.3	80515.3	115312
535000000000	8683.15	16301.7	34030.4	42373.4	58832.5	80544.5	115334
536000000000	8618.22	16176.7	34042.8	42272.3	58818.9	80692.1	115463
537000000000	8615.09	16291.8	34122.9	42318.7	58937.2	80755.1	115666
538000000000	8717.95	16206.6	34034.9	42369.1	58798.4	80861.6	115485
539000000000	8735.03	16258.1	34139.2	42329.9	58910.9	80920	115399
540000000000	8692.43	16235.4	34075.1	42258.2	58774	80788.3	115191
541000000000	8647.77	16249	34104.1	42283.7	58912.8	80802.6	115212
542000000000	8722.56	16230	33956.7	42332	59069.5	80946.5	115587
543000000000	8760.09	16275.2	34294.7	42404	58917.7	80773.8	115597
544000000000	8810.19	16191.8	34120.1	42284.3	58853.8	80979.3	115193
545000000000	8780.24	16244.1	34185.4	42272.4	58911.8	80676.2	115537
546000000000	8722.92	16250.9	34161.7	42391.8	59012.2	81159.9	115446
547000000000	8782.05	16226.6	34219.9	42343.7	59105.4	81246.3	115519
548000000000	8699.81	16246.5	34108.7	42332.7	59149.7	80986.5	115738
549000000000	8719.56	16200.4	34241.5	42479.1	59100.5	81108.2	115540
550000000000	8739.02	16184.8	34179.7	42265.1	59152.6	81237.9	115501
551000000000	8685.82	16287.1	34167.5	42363.6	59020.5	81025.9	115292
552000000000	8748.62	16288.1	34192	42511.3	58958.4	81024.1	115697
553000000000	8763.97	16257	34223.5	42409.1	59105.7	81175.6	115498
554000000000	8775.34	16247.8	34169.6	42388.8	59149.5	81207.2	115457
555000000000	8733.06	16299.3	34334.2	42392.5	59096.2	81249.7	115822
556000000000	8791.38	16299.9	34292.5	42413.8	59090.7	81179.8	115733
557000000000	8745.25	16298.8	34201.6	42472.2	59172.6	81257.9	115387
558000000000	8735.68	16332.8	34175.8	42489.8	59128.8	81407.2	115762
559000000000	8740.91	16311.8	34177.3	42369.6	59087.1	81341.3	115228
560000000000	8820.01	16279.2	34262.4	42517.3	59144.4	81411.7	115439
561000000000	8826.16	16330	34298.9	42420.7	58977.5	81235.9	115725
562000000000	8781.85	16296.7	34406.7	42411.1	59288.2	81282.7	115708
563000000000	8807.66	16389.2	34306.7	42453.1	59372	81381.7	115466
564000000000	8727.31	16307.2	34336.8	42349.6	59323.1	81466.3	115434
565000000000	8755	16350.4	34378.5	42312.9	59134.4	81460.1	115534
566000000000	8779.58	16391.3	34379.2	42527.2	59403.3	81420.7	115643
567000000000	8778.21	16194.9	34284.5	42495.4	59361.7	81479.8	115541
568000000000	8827.87	16348	34339.8	42595.7	59173.9	81514.7	115563
569000000000	8745.04	16343.9	34321.9	42488.5	59503.5	81519.1	115607
570000000000	8788.21	16354.2	34385.6	42548.9	59203.4	81673	115720
571000000000	8852.9	16387.7	34278.5	42418.3	59253.3	81538	115525
572000000000	8831.69	16371.9	34282	42516.4	59331.8	81712.3	115905
573000000000	8779.52	16302.8	34398.9	42402.7	59225.4	81761.6	115611
574000000000	8831.09	16369.6	34329.7	42619.8	59345.7	81659.3	115803
575000000000	8752.42	16422.3	34311.3	42362.5	59329.7	81559.4	115609
576000000000	8841.53	16445.4	34421.4	42457.8	59349.4	81786.8	115524
577000000000	8769.67	16271.6	34364.3	42539.2	59378.6	81657.5	115683
578000000000	8809.17	16425.2	34414.9	42507.3	59359	81703.7	115598
579000000000	8792.67	16336.3	34492.9	42588	59457.7	81819	115471
580000000000	8837.8	16300.8	34470.1	42684.9	59467.8	81822.9	115697
581000000000	8859.92	16395.9	34395.9	42588.1	59603.9	81790.2	115446
582000000000	8792.6	16411.2	34400.4	42573.7	59501.1	81716.5	115677
583000000000	8780.13	16406.2	34419.7	42677.1	59491.6	81737.9	115554
584000000000	8826.85	16319.6	34481.6	42622.8	59501.1	81644.2	115912
585000000000	8829.45	16490.7	34428.2	42565.2	59305.9	81639.9	115769
586000000000	8835.25	16402.9	34380	42622	59475.4	81967.6	115635
587000000000	8806.01	16426.7	34396.9	42693.1	59690.4	81856.8	115739
588000000000	8810	16472.9	34533.4	42524.8	59514.8	81969.5	115746
589000000000	8807.4	16429.4	34452.4	42587.3	59550.4	81899.5	115865
590000000000	8842.01	16483.7	34415.7	42651.4	59473.1	81904.2	115783
591000000000	8831.68	16408.1	34387.1	42688.5	59616.6	81950.1	115494
592000000000	8891.15	16382.6	34466.3	42757.9	59660	81945	115658
593000000000	8876.97	16437.4	34537.4	42667.6	59512.5	82038.5	115645
594000000000	8851.58	16409.1	34448.8	42575.9	59513.8	82088.2	115767
595000000000	8819.38	16451.1	34407.7	42689.5	59718.5	82158.8	116073
596000000000	8874.88	16374.5	34499.1	42667.7	59704.8	82107.9	115707
597000000000	8860.85	16418.2	34491.4	42764.9	59784.1	82081.7	115762
598000000000	8907.76	16417.1	34584.9	42655.9	59660	82039.8	115920
599000000000	8823.03	16495	34547.9	42797.5	59688.3	82023	115677
600000000000	8866.65	16547.9	34614.1	42772.3	59769.7	82195.1	115657

## Sheet: Sheet1
Time(s)	0.468uM DAP	0.937uM DAP	1.875uMDAP	3.75uM DAP	7.5uM DAP	15uM DAP	30uM DAP
0	5868.89	6673.6	9060.11	10571.9	18204.1	29767.6	45796.5
1	5900.49	6670.52	9194.72	10697.2	18678.9	30141.7	46194.9
2	5900.2	6685.77	9345.29	10867.6	18888.2	30506.7	46472.1
3	5875.56	6751.6	9457.09	11051.4	19102.6	30936	46987.7
4	5919.51	6749.19	9567.28	11212.2	19252.1	31357.3	47377.2
5	5934.6	6792.2	9736.21	11377.1	19475.9	31873.9	47940.7
6	5944.2	6778.34	9853.75	11585.4	19793.2	32168.9	48260.2
7	5953.26	6795.43	10057.1	11757	20053.7	32438.4	48519.7
8	5925.39	6761.25	10136.8	11952.7	20352.6	32878.2	48975.2
9	5975.11	6814.46	10235.5	12168.8	20583.3	33376.8	49531.5
10	5940.01	6822.42	10408.7	12353.2	20970.4	33620.9	49724.2
11	5980.34	6881.84	10555.2	12532.3	21275.8	33982.5	50243.8
12	5973.66	6846.8	10761	12697.8	21591.8	34211.2	50676.4
13	5996.59	6892.93	10796.5	13000	21989.5	34490.3	51029
14	5960.4	6938.06	10977.1	13216.5	22255.3	34951.5	51320.8
15	5975.79	6944.44	11061.5	13395.4	22640.9	35246.5	51913.4
16	6004.03	6934.31	11295.7	13519.5	22946.4	35727.9	52564.6
17	6084.01	6934.74	11429.6	13666.3	23322.6	35959.7	52945
18	6021.65	7001.56	11615.5	13874.3	23508	36275	53500.5
19	6047.6	7032.53	11702.6	14043.8	23848.5	36560.5	54429.4
20	6061.31	6998.56	11906.2	14189.6	24170.2	36851.6	55228.2
21	6084.27	7038.29	12000.6	14470.5	24505.3	37097.6	55847.8
22	6099.21	7089.02	12116	14613.4	24751.9	37498.9	56647.7
23	6091.4	7050.53	12277.2	14729	25078	37648.5	57380.2
24	6109.83	7095.99	12419.5	14871.8	25422.2	37889.5	58156.7
25	6152.47	7094.27	12607.6	15069.5	25724.8	38291	58942.9
26	6169.59	7140.16	12666.4	15221.9	26064	38683.1	59618.9
27	6085.49	7167.16	12773.6	15350	26391.3	39005.5	60496.3
28	6148.7	7228.38	12945.2	15565.7	26541.5	39363.5	61041.8
29	6164.02	7233.05	13012.8	15676.9	26800.6	39837.7	61913.5
30	6099.27	7280.85	13178.5	15956.8	27080.5	40187.5	62514.2
31	6126.09	7289.91	13311.8	16045.9	27514.9	40267.8	63161.3
32	6113.8	7310.42	13350.4	16326	27664.4	41021.2	63898.4
33	6102.57	7337.02	13493.8	16483.6	27968.6	41212	64374.9
34	6082.78	7322.41	13681.5	16707.5	28220.3	41410.5	65074.5
35	6089.1	7356.82	13788.4	16935.6	28368.2	41889.4	65626.2
36	6097.04	7361.29	13889.2	17043.9	28606.9	42119.1	66208
37	6079.12	7380.9	14018.9	17367	28880.9	42625.6	66646.6
38	6111.54	7411.1	14072.2	17431.8	29145	43026.2	67189.6
39	6143.11	7401.41	14213.8	17796.5	29340.4	43256.4	67719.5
40	6158.5	7423.36	14310.4	17896.9	29575.8	43598.7	68193.6
41	6150.79	7393.99	14436.6	18127.5	29836.1	44010.2	68570.3
42	6148.96	7427.07	14622	18310.4	30190.9	44409.8	69269.1
43	6181.31	7452.93	14595	18562.9	30283.7	44628.6	69332.7
44	6199.86	7440.64	14739.7	18659.6	30586.9	44836.9	69908.5
45	6190.22	7491.31	15002.4	18954.3	30706.3	45265.5	70338.9
46	6170.4	7539.76	15038.2	19050	30880	45703.2	70787.5
47	6225.28	7567.92	15210.3	19161.8	30990	45981.3	71315.7
48	6220.96	7569.2	15299.9	19498.9	31335.7	46209.3	71687.7
49	6180.63	7629.89	15454.2	19614.9	31469.1	46581.9	71909.1
50	6198.97	7623.25	15448.3	19868.9	31730.6	46883.8	72258.5
51	6217.44	7627.11	15647.5	20047.6	31922.8	47190.4	72973.6
52	6234.59	7688.96	15733.3	20173.7	32135.1	47694	73102
53	6216.03	7713.47	15763.4	20406.9	32332.7	47764.7	73660.1
54	6238.22	7736.75	15989.8	20558	32498.2	48113	73893.2
55	6245.3	7795.55	16053.3	20664.9	32538.7	48566.7	74102.3
56	6276.39	7825.01	16185.3	20848.7	32921.9	48723.1	74784.7
57	6291	7801.08	16287.2	20963.1	33097.7	48900.9	74850.3
58	6217.05	7857.26	16282	21207.6	33168.1	49270.5	75202.7
59	6252.99	7859.32	16497.7	21282.9	33358.7	49521.5	75456
60	6241.21	7911.65	16566.3	21445.2	33582.5	49733.1	75693.8
61	6254.59	7898.81	16588.6	21630	33906.7	50118.6	76021.6
62	6219.13	7946.74	16783	21620.3	33938.4	50417.6	76404.1
63	6264.36	7964	16892.4	21870.2	34162.4	50653.3	76770.6
64	6304.35	8015.43	17068.5	22009	34391.4	50800.6	76874.1
65	6274.24	8055.93	17130.4	22242.8	34515	51145.9	77041.5
66	6334.34	8094.77	17319.8	22411.4	34804.7	51509.4	77471.6
67	6355.52	8127.08	17294.2	22599	35006.8	51566	77684.8
68	6296.6	8126.27	17451.5	22652.3	35083.8	52066.3	78102.3
69	6283.18	8108.09	17434	22835.8	35310.6	52055.6	78291.4
70	6305.94	8196.65	17633.9	23098.3	35494.3	52455.1	78390
71	6377.96	8233.42	17683.4	23174.9	35758.6	52645.6	78742.9
72	6321.43	8183.32	17747.2	23300.9	35809	52918.4	78865.8
73	6368.36	8166.84	17845.6	23428.6	35956.6	53273.2	79277.9
74	6328.32	8287.39	17838.5	23576	36208.5	53365.3	79454.8
75	6327.92	8331.93	17928.5	23793.2	36432.9	53572.5	79690.2
76	6340.91	8350.06	18096.2	23764.2	36619	53791.1	79958.1
77	6320.65	8407.72	18086	23945.5	36666.6	53973	80211.2
78	6345.73	8465.14	18216	24098.7	36725.8	54398.6	80431.2
79	6349.76	8394.28	18381.5	24289.8	37125	54498.6	80452.1
80	6348.14	8457.69	18446.1	24299.1	37267.5	54887.1	81106.5
81	6319.15	8476.78	18541.6	24504.3	37453.1	54846.1	80956.3
82	6441.26	8508.05	18551.1	24645.3	37542.9	55107.2	81337.4
83	6360.79	8609.76	18671.8	24664.4	37696.7	55384.2	81288.3
84	6373.87	8549.27	18765.1	24761.9	37802.7	55510.6	81454
85	6385.13	8586.42	18838.8	24932.4	38097.5	55850.7	81766.1
86	6447.8	8605.32	18993.4	25145.5	38278.2	55946.5	82033.5
87	6445.41	8695.43	19038.4	25176.4	38494.2	56026.5	82072.2
88	6424.74	8679.54	19110.8	25406.5	38494.4	56232.3	82137.9
89	6443.65	8696.62	19127.6	25493.6	38667.2	56304.6	82516.6
90	6456.43	8798.66	19236.2	25410.5	38829.5	56472	82724.8
91	6436.45	8741.29	19314.9	25685.7	38890.1	56519.5	82868.1
92	6450.88	8821.35	19513.7	25761.2	39174.3	56813.7	83184.9
93	6461.89	8825.6	19532.4	25894.3	39413.6	56895.9	83254.4
94	6484.75	8921.12	19600.1	26124.4	39394.2	56934.4	83419.3
95	6515.82	8900.64	19767.9	26166.7	39516	57163.2	83820
96	6512.72	8962.39	19813.1	26304.1	39786.2	57354.5	83981.5
97	6460.02	8930.72	19907.1	26414.2	39826.7	57476.6	84092
98	6467.4	8982.21	20022	26492.9	39936.3	57678	84418.5
99	6475.32	9032.35	19995.2	26696.2	40098.9	57666.2	84574.8
100	6522.6	9109.76	20176.2	26728.8	40366.2	57707.1	84945.7
101	6487.33	9143.05	20241.8	26855.9	40429.6	57860.4	85207.6
102	6521.07	9155.18	20272.2	27076.5	40553.5	58080.2	85213.9
103	6510.62	9148.32	20321.5	27062.3	40718.4	58040.1	85362.5
104	6517.87	9172.19	20448.9	27130.7	40835.3	58310	85515.8
105	6535.44	9294.95	20613.2	27396.6	40967.9	58341.1	85984.9
106	6530.23	9314.73	20528.5	27380.6	41182.5	58473.6	86027.8
107	6522.66	9287.32	20584.6	27555.3	41107.6	58416.8	86489.5
108	6530.67	9319.58	20696.1	27587.1	41325.6	58848.2	86457
109	6574.93	9401.94	20804.3	27706.8	41523.2	58825.3	86923
110	6561.49	9343.57	20902.6	27921.4	41735.4	58890.7	86764.6
111	6549.84	9421.18	20983.9	27961	41813.2	58976	87126.3
112	6600.49	9480.2	21082.5	28086.1	41953.9	59067.7	87236.5
113	6592.47	9439.39	21071.8	28283.1	42128.6	59142.2	87552.8
114	6576.71	9501.51	21185.1	28362.2	42227.3	59325.2	87596.7
115	6614.19	9546.28	21221.8	28425.5	42407.5	59458.1	87890.1
116	6565.6	9563.73	21349.7	28625.7	42534.8	59486.3	88310.2
117	6603.95	9571.9	21357.6	28691	42593.1	59569.4	88509.7
118	6622.03	9579.65	21376.5	28735.2	42586.7	59810	88601.2
119	6634.07	9660.93	21506.3	28865.1	42783.3	59812.4	88955.6
120	6606.42	9625.32	21568.3	28946.3	43017.8	59982.8	89120.6
121	6634.48	9686.69	21631.2	28951.3	43107.2	59895.7	89321.4
122	6633.61	9741.67	21650.5	29142.7	43144.3	60174.9	89416.2
123	6645.32	9774.7	21725.7	29265.6	43260.4	60227.7	89705.3
124	6591.82	9873.77	21839.5	29280.5	43483.7	60359.6	89709.7
125	6658.91	9860.06	21848.6	29435.2	43535.6	60375.8	90007.3
126	6656.5	9837.67	21981.4	29592.6	43597.5	60622.9	90248.1
127	6714.25	9964.31	22073.4	29669.7	43761.5	60723	90351.7
128	6705.55	9965.14	22060.6	29653.1	43902.6	60913.6	90583.2
129	6704.94	10003.8	22168.7	29839.5	44012.1	60795.3	90786.4
130	6694.32	10014.6	22177.1	29978.7	44162.5	61049.7	90831.9
131	6743.78	10046.8	22291.8	30144.8	44163.7	61183	91094.3
132	6730.4	10064	22356	30120.7	44299.2	61179.2	91333.2
133	6740.69	10100.3	22409.8	30173.9	44462.2	61332.5	91168.1
134	6731.13	10126.1	22428.5	30226.1	44584	61456.2	91713.6
135	6830.05	10117.3	22497.9	30283.2	44656.4	61395.4	91759.1
136	6792.26	10173.6	22601	30486.7	44764.9	61634.4	91757.6
137	6745.85	10207.4	22601.6	30591.5	44944.9	61636.9	91947.6
138	6802.9	10271.1	22742.2	30776.5	44963.4	61740.1	92347.1
139	6819.55	10262.8	22914.3	30731.8	45100.4	61903.9	92307.5
140	6797.19	10296.4	22922.4	30780.3	45100.8	62056.9	92550
141	6826.82	10369.3	22869.8	30997.7	45315.7	62122.7	92622.5
142	6845.84	10387.1	23002.3	30981.7	45390.2	62141.7	92799.7
143	6826.99	10482	23111.6	31104	45524	62149	93099.8
144	6826.68	10392.9	23169.2	31193.6	45579.7	62429.1	92944.5
145	6770.41	10503.8	23192.9	31345	45600.6	62431.3	93308.7
146	6774.28	10511.4	23247.2	31321.2	45596.1	62341.3	93226
147	6875.3	10574.5	23274.2	31469.3	45626.6	62460.6	93512.2
148	6829.48	10608.6	23403.8	31513.5	45761.2	62657.8	93568.7
149	6892.75	10556.6	23333.4	31550.7	46155.7	62685.1	93918.6
150	6816.84	10666.3	23541.7	31723.4	46038.2	62759.2	94008.1
151	6812.39	10617.3	23556.9	31696.7	46245.2	62984	94328.8
152	6790.19	10695.6	23637.9	31816.1	46190.8	63103.8	94419.8
153	6874.1	10800	23792.7	31969.2	46446.1	63154.9	94544.1
154	6901.31	10826.3	23814.3	31941	46399.7	63168	94598.6
155	6911.99	10786.7	23921.7	32114.4	46457.6	63264.3	94930.7
156	6884.19	10810.2	24009.7	32254.3	46606.1	63380.1	94999.5
157	6866.64	10871.7	24154.5	32218.8	46608	63332.2	95062.5
158	6854.52	10916.3	24219.6	32268.3	46736.6	63593	95362.8
159	6919.94	10919	24221.1	32406.3	46681.6	63372.1	95459.1
160	6905.63	10938.2	24322.9	32463.1	46908.5	63641.4	95951.3
161	6936.53	10981.2	24458.3	32415.1	47109.2	63833.5	95995.9
162	6885.31	11022.1	24526.1	32567.7	47117.1	63871.4	96214.4
163	6964.64	11106.5	24561.7	32655.2	47194.4	63886.5	96199.8
164	6930.86	11114	24641.6	32758.9	47121.4	64110.6	96282.9
165	6917	11093.2	24737.6	32820.9	47200.7	64163.1	96368.3
166	6996.9	11169.3	24776.3	33019.2	47296.5	64232.3	96719.9
167	6922.6	11172.4	24936.4	32817.1	47312.5	64278.4	96951.5
168	6974.99	11122.7	24960	32950.6	47533.1	64502.1	97205.9
169	6966.75	11288.6	25002.6	33020	47441.3	64450.1	97185.5
170	6979.07	11217.3	24952.1	33133.3	47548.4	64637	97336.4
171	6985.65	11245.7	25111.6	33149.9	47683.3	64833.7	97349.9
172	6921.91	11263.8	25188.9	33189	47743.7	64916.8	97774.5
173	6972.57	11294	25177.1	33368.3	47786.7	65083.3	97832.3
174	6979.35	11322.8	25250.3	33375.3	47849.7	65030.9	98027.5
175	6981.35	11366.1	25172.4	33503.8	48015	64999.5	98197
176	6971.81	11442.9	25179.8	33375.8	48172.2	65199.5	98288.9
177	6991.82	11408.8	25228.8	33561.9	48338.4	65351.9	98579.6
178	6969.69	11452.7	25290.6	33571.9	48242.7	65328	98537.2
179	7008.04	11508.5	25455.8	33629.8	48380.8	65303.8	98985
180	7043.98	11499.7	25467.1	33675.8	48478.6	65461.7	99225.4
181	7011.81	11628.4	25434.6	33711.9	48529	65518.9	99079.9
182	7013.1	11614	25446.4	33849.3	48467	65616.1	99083.5
183	6981.64	11643.1	25509.5	33949.6	48602.9	65825.9	99357
184	7041.18	11668.9	25652.6	34007.4	48590.4	65881.3	99375.5
185	7062.55	11646.4	25684.5	34032.2	48875	65845.2	99466.1
186	7108.39	11629.1	25743.1	34151.2	48807.1	65955.5	99804.2
187	7098.03	11727.2	25783	34278.5	48912.1	65976.7	99921
188	7093.21	11739	25831.5	34273.5	49058.7	66152.9	99936.3
189	7033.76	11795	25797	34317.8	49128.8	66066.2	99985.7
190	7121.27	11745.6	25840.2	34240.6	48992.6	66059	100080
191	7057.78	11867	25958.7	34358.9	49194.8	66220.3	100364
192	7070.64	11842	26071	34516.5	49310.6	66435.2	100203
193	7114.98	11821.1	26126.9	34657.1	49232.1	66331.6	100467
194	7126	11872.6	26131	34566.4	49268.2	66207	100578
195	7098.29	11948	26265.4	34620.7	49437.5	66555.5	100729
196	7117.22	11955.6	26280.2	34608.5	49527.9	66512.9	100936
197	7174.54	11956.6	26186.7	34689.1	49626.7	66516.9	101205
198	7140.93	11950.3	26354	34720.9	49545.6	66778.3	101065
199	7141.52	12044.5	26321.9	34853.7	49766.6	66696.1	101035
200	7162.48	12062.4	26455.8	34816.2	49730.4	66583.7	101271
201	7073.06	12062.8	26474.6	34955.4	49747.1	66822.9	101213
202	7160.88	12021.7	26539.9	34893.9	49959.4	66881.8	101131
203	7133.31	12165.4	26545.3	34998.7	49971.1	66862.4	101576
204	7125.65	12143.2	26601.5	35039.9	49950.4	67015.1	101472
205	7157.61	12126.4	26681.5	35076	50053.3	67049.9	101661
206	7175.16	12229	26724.5	35186.7	50066	67036.3	101782
207	7230.81	12231.5	26770.3	35279.9	50203.1	67119.3	101815
208	7249.94	12202.1	26871.9	35361.5	50172.3	67184.2	101899
209	7199.77	12320.1	27008.3	35309.8	50313.3	67284.3	102064
210	7207.6	12263.3	26862.9	35453.3	50209.9	67315.9	101947
211	7214.96	12452.5	26984.9	35451.9	50211.8	67372.8	102139
212	7213.95	12332.2	27050.3	35447.8	50340	67211.5	102275
213	7208.73	12423.5	27079.9	35411.5	50283.3	67628.3	102438
214	7188.69	12356.9	27187.1	35501.3	50576.7	67595.5	102380
215	7241.34	12415.1	27265.1	35609.8	50424	67490.9	102570
216	7196.23	12466.9	27198.6	35579.4	50538	67650.2	102709
217	7191.11	12457.3	27320.1	35826.5	50549.3	67651.9	102830
218	7241.73	12545.8	27330.2	35778.5	50569.3	67687.5	103079
219	7217.43	12507.6	27309	35749.1	50730.6	67745.1	103071
220	7286.51	12564.3	27423.3	35913.7	50738	67843.7	103115
221	7262.09	12605	27530.4	36046	50820.7	67904.4	103025
222	7257.55	12556.5	27470.4	35874.4	50841	67812.2	103202
223	7304.32	12592.2	27564.7	35974.9	50930.4	68040.2	103220
224	7308.21	12615.6	27605	36002.1	50950.3	68037.5	103172
225	7303.96	12697.2	27588.3	36089.1	50992.6	68022.4	103369
226	7253.09	12716.4	27577.5	36108	50904.2	68192.4	103548
227	7287.2	12663.3	27709.4	36304.1	51104.3	68124.7	103582
228	7245.49	12639.9	27777.5	36117.4	51092.5	68226.1	103548
229	7269.5	12703.4	27798.9	36057.8	51006.1	68172.3	103856
230	7258.51	12758.9	27777.4	36246.3	51175	68359.5	103765
231	7347.21	12786.3	27960.7	36322	51161.7	68274.3	103974
232	7352.49	12740	27893.4	36389.2	51110.5	68574.4	103945
233	7261.62	12768.3	27977.7	36375.1	51126	68595.4	104107
234	7307.92	12868.4	28061.6	36439.6	51331.9	68503.4	104204
235	7381.78	12864.8	27998	36384.5	51495.6	68466.8	104034
236	7334.37	12932.5	28074.8	36482.1	51391.8	68713	104375
237	7342.64	12865.3	28129.9	36486.5	51433.4	68684.5	104429
238	7372.63	12934.7	28083.7	36488.6	51497.6	68764	104503
239	7324.83	12966.7	28153.2	36684.7	51311.9	68720	104430
240	7396.07	12910	28220.4	36636.5	51441	68953.2	104584
241	7332.64	13000.9	28311.7	36723.1	51609.2	68928.2	104790
242	7331.12	13083	28267.5	36616.3	51426.5	68942.4	104731
243	7452.04	13024.2	28427.6	36663.1	51644.6	68988.3	105017
244	7430.41	13032.4	28426.5	36778.4	51563.8	69121.8	105008
245	7437.82	13025.6	28549.5	36972.4	51713.3	69027.3	104901
246	7458.99	13068.7	28378.4	36744.9	51672	69286.4	105091
247	7386.17	13099.6	28557.7	36904.1	51814.1	69324.1	105268
248	7427.91	13100.6	28523.2	36924.6	51676.4	69373	105037
249	7409	13082.6	28671.5	36980.3	51824.5	69302.2	105268
250	7354.96	13133.9	28700.2	37000.7	51767.9	69636.1	105389
251	7414.15	13208.2	28675.3	37102.8	51817.9	69571.8	105324
252	7373.46	13185.8	28729.6	37100.8	51949.9	69489.8	105500
253	7449.21	13195.9	28680.4	37095.1	51993.6	69823.7	105801
254	7416.16	13227.8	28729.1	37186.8	51958.9	69853.9	105702
255	7445.27	13226.6	28827	37171.7	52080.1	69779.5	105875
256	7499.38	13346.9	28827.6	37309.2	52007.7	69697.6	105931
257	7482.86	13290.8	28873.8	37243.9	52005.6	70091.6	106086
258	7499.5	13289.3	29018.8	37452.6	52115.1	69954.8	106210
259	7512.28	13266.5	28952.2	37403.7	52286.7	70076.4	106227
260	7529.08	13298.4	28988.1	37368	52067.6	70069.9	106158
261	7494.97	13348.9	29057.2	37416	52368	70190.8	106136
262	7542.36	13302.7	29014.8	37418.3	52258.8	70274	106405
263	7484.89	13416.8	29049.9	37538.4	52346	70136.7	106638
264	7518.94	13475.4	29159.5	37557.1	52400.1	70256.7	106560
265	7497.25	13376.4	29214.3	37612.9	52547.7	70401.7	106559
266	7528.53	13538.2	29194	37661.2	52395.3	70368.2	106675
267	7514.44	13521.3	29236.6	37746.4	52372.2	70543.9	106927
268	7544.15	13568.2	29338.6	37711.3	52588.4	70461.1	106866
269	7553.51	13498.3	29303	37824.2	52621.8	70372.7	106936
270	7530.43	13572.6	29274.4	37849.6	52633.4	70519.3	106941
271	7520.47	13592.6	29451.6	37786.8	52511	70799	107025
272	7488.72	13555.8	29361.3	37933.8	52622.3	70700.4	107139
273	7576.65	13543.3	29462.9	37822.7	52648.6	70836	107320
274	7548.24	13632	29635.8	38065.7	52742.4	70786.4	107326
275	7629.58	13621.3	29601.2	37880.9	52728.4	70821.5	107696
276	7626.42	13578.2	29552.6	37984.5	52745	70862.7	107565
277	7632.68	13683.5	29597.9	38020.6	52842.8	70986.1	107597
278	7602.29	13644.7	29587.5	38083.7	52874.6	70969.7	107723
279	7605.41	13627.9	29726.4	37933.4	52998.8	71064.3	107778
280	7629.51	13685.2	29636.5	38197.9	52938.9	71025.3	107845
281	7701.54	13724.1	29809.9	38032.2	52971	71222	107793
282	7643.91	13763.7	29725.6	38201.6	53072.6	71246.3	107998
283	7644.25	13823.6	29723.7	38111.4	53081.1	71269.6	108000
284	7687.78	13835.4	29826.4	38229.3	52896.7	71571.6	108149
285	7583.12	13816.8	29734.6	38252.1	53052.4	71522.2	108187
286	7624.32	13771.4	29957.4	38283.1	53086.7	71562.1	108075
287	7665.9	13791	29965.3	38288.1	53213.4	71634.1	108428
288	7744.2	13908.1	29950	38300.6	53121.6	71580.5	108116
289	7670.3	13867.2	29866.7	38466.1	53268	71498.4	108397
290	7666.76	13860.7	30059.4	38281.6	53385.9	71584.8	108545
291	7655.21	13901	30145.6	38391.3	53469.8	71785.9	108345
292	7655.98	13837.1	30137.6	38436.6	53333.8	71754.3	108721
293	7681.93	13955.8	30135.3	38410.6	53340.1	71574	108615
294	7712.12	14041.2	30206.3	38642.1	53484.7	71615.3	108721
295	7685.89	14002.7	30187	38497.5	53288.5	71909	108794
296	7682.48	13973.7	30266.5	38579.9	53487.4	71943	108814
297	7738.03	13940.8	30137.2	38571.7	53448.1	71908.3	108748
298	7738.61	14038	30134.1	38646.1	53478.3	72030.1	108819
299	7726.49	13993.8	30209.4	38585.9	53499.3	72138.2	108894
300	7738.7	14077.3	30377.5	38508.3	53471.1	71988.5	109092
301	7751.65	14127.6	30260.1	38516.6	53550.6	72299.3	109300
302	7748.16	14070	30281.8	38747.1	53621.4	72285.6	109067
303	7738.46	14073.9	30353.7	38855.7	53699.7	72299.5	109035
304	7732.42	14135.8	30528.6	38731.4	53736.2	72338.8	109413
305	7752.05	14077.2	30466.8	38894.1	53671	72528.4	109271
306	7819.11	14133.6	30437.1	38897.3	53790.5	72348	109333
307	7737.07	14213.8	30444.2	38796.4	53716.5	72436.1	109244
308	7759.81	14186.5	30460.5	38792.7	53875.1	72401.6	109477
309	7808.9	14177	30515.2	38815.9	53857.3	72373.2	109480
310	7708.9	14204.8	30523.3	38840	53800.3	72651.8	109590
311	7779.61	14158.8	30583.5	38952.2	53867.2	72652.6	109783
312	7849.57	14218.2	30622.2	38917.2	53989.4	72925.7	109592
313	7758.39	14218.4	30679.6	38994.7	53947.1	72656.1	109806
314	7783.27	14361	30553.5	39067.4	53980.2	72759.5	109853
315	7822.59	14282.3	30706.9	38964.2	53853.5	73058.6	110103
316	7821.63	14307.5	30648.2	39124.5	54024.8	72996.1	110125
317	7785.83	14247.5	30750.5	39176.3	53857.2	73054.5	110152
318	7775.45	14304.5	30820.8	39111	54121.8	73192.8	110131
319	7805.19	14253.5	30771.9	39096.6	54116.9	73261.1	110265
320	7824.63	14399.4	30887.1	39145.6	54052.6	73090.3	110030
321	7866.64	14385.5	30870.7	39101.9	54109.3	73388.8	109991
322	7831.41	14438	30834.7	39271.8	54236.7	73297.2	110181
323	7886.95	14380.6	30761.8	39240.4	54107.3	73368.2	110485
324	7862.12	14441.3	30859.9	39295.3	54162.9	73202.1	110290
325	7882.77	14386.7	31006.5	39368.1	54235.5	73444.4	110291
326	7872.5	14512.2	31084.4	39317.6	54361.9	73367.4	110430
327	7843.92	14365.8	31072	39317.5	54216.2	73496	110298
328	7868.46	14396.8	31041.6	39399.4	54354.8	73749.5	110338
329	7851.05	14447.5	31074.9	39320.1	54386	73539	110624
330	7907.37	14482	31066.1	39460.7	54462.7	73510.9	110432
331	7902.4	14529.3	31068.9	39428.1	54434.9	73775	110689
332	7912.66	14550.9	31203.4	39394.4	54427	73691.2	110594
333	7901.85	14485.7	31072.2	39421.1	54400.3	73592.2	110684
334	7904.15	14560.4	31273.6	39680.7	54584.7	73902.1	110730
335	7892.95	14482.1	31117.8	39537	54420.3	73974	110735
336	7941.85	14573.6	31198	39552.1	54536.9	74018	110933
337	7911.26	14579.3	31276.4	39581.3	54695.4	74093.1	110944
338	7959.09	14535.8	31240.7	39548.7	54617.1	74060.5	110675
339	7936.83	14636.2	31329.9	39602.6	54489.3	74188.8	110766
340	7950.16	14628.8	31196.3	39596.2	54494.2	74145.1	110805
341	7977.93	14569	31293.6	39585.8	54536.9	73889.4	111061
342	8004.46	14727.4	31324.9	39703.1	54594.9	74267.7	110934
343	8009.03	14619.9	31345.1	39723.6	54659.5	74228.1	110912
344	7955.23	14673	31483.1	39681.2	54680.8	74293.3	111299
345	7916.37	14668.3	31371	39700.5	54736.9	74473.7	111236
346	8020.94	14667	31478.4	39707.2	54768.4	74431	111458
347	7972.54	14591.6	31400.7	39697.6	55007.9	74328.1	111179
348	7939.32	14718.4	31519.9	39876.8	54897.5	74613.1	111601
349	8006.05	14755.1	31566.9	39784.7	54767.5	74481.8	111222
350	7942.04	14779.3	31459.1	39793.9	54852	74505.7	111348
351	8057.06	14688.5	31617.3	39835.2	54874.4	74633	111506
352	7972.87	14792	31502.8	39959.6	54902.1	74576.5	111404
353	8003.58	14785.1	31598.5	39879.5	54908.2	74620.9	111382
354	7957.45	14732.4	31495.6	39868.3	55002	74792.5	111516
355	7998.85	14768.3	31635.7	39824	54924.5	74716.4	111451
356	8046.37	14792.8	31591.7	39968	55087.4	74721.3	111473
357	8028.78	14861.5	31568.4	39869.9	54961.5	74778.4	111644
358	8063.89	14836.4	31683.7	39922.6	55036.8	75032.8	111494
359	8050	14852.3	31696.8	39916	55170.5	74955.4	111545
360	8021.04	14934.8	31811.4	40015.4	55221.7	74942.4	111860
361	8044.35	14834.1	31765.8	40053.3	55324.5	74932.4	111670
362	8015.59	14878.5	31745	40081.8	55151.9	75229.8	111707
363	8074.41	14915.7	31815.4	40085.6	55384	75118.3	111678
364	8051.42	14947.7	31907.1	40139.5	55246.8	75259.9	111612
365	8043.52	15007.4	31894.6	40115.9	55323	75232.7	111776
366	8067.73	14974.7	31823.2	40071.1	55238.3	75366.2	111832
367	8069.32	14952.8	31861.1	40238.3	55330.9	75211.2	111802
368	8035.96	14872.5	31845.9	40194.2	55297.2	75232.4	111699
369	8039.57	14981.3	31955.7	40133.4	55462.8	75301.4	111847
370	8040.11	14999.6	31972	40269.8	55321.6	75338.9	111629
371	8080.61	14909.2	32000.2	40277.9	55410.8	75276.3	112029
372	8085.45	14979.3	32060.2	40277.4	55339.3	75361.4	111956
373	8102.6	14937.1	31973.1	40233.3	55608.8	75299.7	111984
374	8034.91	15096.6	32094.2	40242.3	55649.9	75341.8	112015
375	8051.97	14958.9	32000.5	40406.1	55646.4	75427.6	112141
376	8138.74	15016	32007.8	40391.9	55644.5	75558.6	112052
377	8093.08	15088.6	32110.2	40332.1	55660.1	75788.3	111942
378	8066.85	14990.5	32056.4	40450.9	55543.4	75678.7	112077
379	8088.98	15064.3	32077.5	40364	55770.5	75686.7	112125
380	8129.59	15111.4	32029.4	40527.1	55773.9	75858.7	112364
381	8156.93	15026.7	32055	40410.7	55752	75820.5	112335
382	8124.7	15029.3	32095.9	40417.2	55725.2	75804.2	112332
383	8144.54	15062.4	32259.1	40476.8	55909.5	75929.3	112156
384	8129.91	15084.7	32267.3	40467.2	55854.2	76022.8	112433
385	8120.98	15146.8	32050.2	40503.1	55833	76040.8	112289
386	8132.67	15171.7	32130.4	40500.5	55860.5	76043.9	112381
387	8170.37	15227.4	32232.2	40648.8	55906.8	75840.9	112541
388	8140.69	15125.9	32279.2	40572.8	55895.2	76050.7	112328
389	8129.78	15216.6	32349.8	40577.8	55764.5	76074.9	112627
390	8236.55	15131.3	32167.7	40628.3	55992.5	76239	112548
391	8159.46	15214	32327.9	40625.8	56041.6	76334.1	112543
392	8110.56	15206.1	32265.7	40571.7	56067.8	76207.2	112685
393	8222.56	15221.7	32316.7	40701.2	55973.3	76223.5	112516
394	8239.99	15241.1	32350.2	40736.5	56030.5	76287.4	112611
395	8207.84	15199	32388.4	40686.4	56059.9	76292.6	112508
396	8155.18	15266.8	32389.8	40670	56036.9	76358	112714
397	8213.7	15237.1	32406.5	40754.9	56078.4	76453.3	112803
398	8221.15	15311.8	32409.2	40772.9	55983.4	76445.7	112527
399	8231.31	15242.2	32498.9	40867.4	56141.9	76372.6	112718
400	8235.81	15207.8	32507.6	40747.6	56171.7	76573.9	112684
401	8231.03	15302.9	32558.2	40713.4	56320.7	76561.9	112735
402	8201.89	15281.6	32573.4	40782.1	56177.6	76612.7	113112
403	8234.42	15278.8	32470.2	40776.5	56354.8	76735.4	112739
404	8198.37	15400.6	32536.2	40856.3	56216.9	76676.5	112994
405	8211.75	15249.9	32669.7	40872.4	56294.3	76589.5	112973
406	8225.32	15305.3	32560.6	40926.9	56327.4	76611.6	112967
407	8249.27	15393.1	32654.6	40772	56245.3	76772.7	112889
408	8241.85	15267.3	32686	40899	56405.3	76908	112980
409	8260.08	15325	32575.7	40927.1	56329.3	76758.1	113143
410	8266.68	15332.3	32617.8	40873.1	56388.3	76891	113061
411	8265.15	15372.5	32625.6	40747.9	56551.9	77078.3	113194
412	8227.03	15402.8	32734.3	40837.4	56403.9	76937.6	113080
413	8278.87	15360.9	32699.3	40992	56456.1	76951.8	113120
414	8306.49	15373.2	32590.2	40900.6	56673.4	77031.3	113240
415	8262.21	15375.7	32818.3	41039.2	56645.2	77090.6	113076
416	8317.06	15388.2	32776.5	40887.2	56560.2	77045.2	112985
417	8247.25	15429.1	32700.1	41017.4	56556.7	77090.2	113191
418	8309.66	15484.3	32656.5	41071.2	56520.8	77051.5	113365
419	8273.21	15378.6	32780	41108.8	56512	77358.5	113283
420	8237.49	15461.7	32779.1	41087.7	56726.5	77195.8	113378
421	8274.22	15401.6	32758.2	41148.8	56700.6	77390.1	113236
422	8342.2	15418	32942	41103.7	56747.4	77227.3	113255
423	8293.19	15528.9	32833.2	41072.4	56627.3	77338.1	113330
424	8308.88	15531.2	32877	41155.9	56813.4	77550.4	113651
425	8326.32	15483	32787.8	41203	56673.2	77623.4	113424
426	8314.28	15538.1	32739.2	41223.7	56751.6	77566.7	113414
427	8342.77	15473.6	32920.1	41229.7	56939	77664.7	113463
428	8285.21	15492.8	32862.3	41172.6	56783.1	77491.1	113530
429	8356.34	15557.6	32942.9	41079.6	56868.7	77719.3	113689
430	8335.78	15598.7	32859.6	41326.4	56997.5	77569.1	113535
431	8368.18	15476.9	32882.4	41098.5	56865	77550.5	113604
432	8351.88	15599.4	32814.5	41098.1	56870.3	77686.6	113741
433	8377.12	15618.6	33098.1	41206.6	57110.9	77853.3	113767
434	8337.49	15625	32981.4	41404.4	56890.5	77693.4	113633
435	8373.54	15616.7	33000.8	41312.3	57028.2	77906	113597
436	8344.98	15538.7	33016.4	41220.3	56988.8	77717.1	113671
437	8273.25	15636.7	33020.6	41289.4	57062.5	78007.1	113838
438	8330.87	15568.4	33017.3	41254	57205.4	77983.6	113831
439	8395.49	15666.3	33019.6	41280.7	56970.8	77697.7	113775
440	8293.82	15653	33106.6	41298.6	57032.6	78019.8	113880
441	8267.4	15511.1	33197.8	41322.8	57136	78026.4	113714
442	8283.78	15558.3	33063.1	41329.3	57261.5	78068.3	114093
443	8351.04	15648.3	33027.1	41433.6	57012.3	77901.7	114070
444	8338.74	15672.5	33205.5	41381.9	57312.5	78151.7	114041
445	8395.96	15647.4	33081.5	41485.4	57302.3	78062.8	113950
446	8335.47	15663.6	33119.9	41315.2	57138.2	78243.5	114192
447	8394.62	15579.6	33164.9	41488.6	57189.2	78016.7	114104
448	8398.82	15661.6	33106.4	41562.6	57354.1	78275.2	114003
449	8451.64	15723.5	33091.9	41441.5	57333.4	78310.7	114062
450	8378.23	15664	33127.2	41476.6	57263.8	78291.4	114159
451	8394.74	15760.7	33312.4	41529.9	57294.2	78422.8	114198
452	8416.32	15726.5	33271.5	41399.3	57286.3	78367.9	114464
453	8402.42	15747.3	33233.5	41611.9	57330.9	78298.6	114243
454	8391.08	15764.5	33261.7	41388.4	57344.6	78240.8	114319
455	8373.16	15666.8	33275.5	41428.1	57394.2	78405.2	114211
456	8377.01	15601.5	33222.4	41508.7	57514.7	78439.2	114234
457	8441.64	15812.7	33284	41575.8	57554.1	78578.4	114331
458	8437.41	15797.7	33286.4	41551.7	57589.4	78426.2	114088
459	8441.26	15798.1	33205.4	41659.7	57514.6	78549.1	114234
460	8415.98	15766.5	33274.1	41413.2	57406.5	78613.1	114578
461	8424.52	15755	33350.4	41636.3	57558.3	78542.2	114341
462	8448.91	15853.7	33363	41468.2	57629.7	78557.1	114497
463	8435.17	15816.1	33324	41629.7	57495	78600	114452
464	8457.57	15785.4	33417.1	41601.2	57705.6	78791.8	114412
465	8486.03	15765.4	33373.2	41555.8	57669.6	78673.7	114405
466	8489.87	15911.3	33355.1	41714.3	57593.2	78799.4	114456
467	8460.66	15850.7	33365.5	41569.4	57696	78659.7	114350
468	8488.61	15783.4	33350.4	41650.9	57670	78659.5	114580
469	8422.82	15886.4	33467.8	41593.6	57790.8	78613	114428
470	8511.76	15840.2	33331.9	41727.4	57880.2	78931.8	114508
471	8460.59	15810.3	33299.4	41604.4	57808.2	78823.7	114261
472	8503.08	15904.4	33401.2	41589.8	57986.8	78863.4	114436
473	8525.36	15843.5	33475.3	41614.2	57813	78991.2	114525
474	8494.98	15840.2	33427.9	41637.3	57771	78930.2	114619
475	8455	15829.1	33434.2	41698.7	57906.2	79025.3	114451
476	8562.53	15872.7	33559.5	41674	58067.1	79010.2	114736
477	8516	15906.8	33516.5	41793.5	57802.9	79008.5	114501
478	8498.09	15925.8	33542.6	41830	57907.2	79196.6	114521
479	8560.81	15885.4	33697.9	41779.2	58073.3	79187	114580
480	8508.92	15890.7	33523.7	41708.4	58055.2	79126.6	114965
481	8477.16	15962.3	33511.3	41939.2	57769.2	79310.9	114737
482	8539.56	15943.1	33661.5	41768.3	57870.9	79204.2	114831
483	8485.78	15967.5	33601.6	41621.8	58127.6	79230.6	114561
484	8538.3	15960.2	33623.8	41875.9	57951.6	79362.6	114743
485	8519.14	15956.6	33609.8	41808.9	57952.1	79337.9	114718
486	8504.76	15915.7	33646.8	41720	58068.6	79342	114788
487	8501.1	15933.4	33704.8	41762.4	57905.2	79355.2	114710
488	8551.54	15936.2	33650.5	41786.1	58086	79402.8	114767
489	8565.98	15928	33659	41805.6	57962.8	79570.2	114881
490	8540.91	15950.3	33573.2	41822.4	58209.8	79501.5	114875
491	8553.56	15955.1	33562.3	41862	58109.4	79493.8	114723
492	8557.67	15957.6	33717.9	41907.6	58140.3	79490.8	115030
493	8562.63	15998.5	33649.3	41896.8	58269.4	79648.1	114837
494	8498.55	16007.2	33639.6	41910.4	58208.9	79520.6	114673
495	8567.66	15957.6	33680.9	41876.2	58105.4	79437.8	114907
496	8575.12	16063.3	33764.3	41639.6	58288.9	79486.1	114969
497	8557.2	15968.3	33653.4	41885.7	58227.2	79703.8	114880
498	8576.24	15914.3	33845.3	41865.5	58241.9	79696.7	114770
499	8615.77	16021.2	33835.6	41862.7	58216.2	79795.9	114830
500	8574.91	16063.4	33709.7	41960.8	58335.5	79711.4	115201
501	8569.38	16010.1	33836.4	42004.2	58335.4	79851.7	114862
502	8649.13	16058.8	33823.4	42032.1	58303.3	79807.6	115002
503	8561.96	16052.1	33735.8	41966.3	58344.3	80012.6	114926
504	8588.5	15965.7	33775.6	41965.9	58284.6	80013	114997
505	8597.57	16019.4	33818.8	41860.9	58332.5	79929.6	115152
506	8614.76	16148.5	33854.1	42009.5	58345.6	79776.4	114898
507	8551.06	16042.2	33856.7	41973.5	58229	79864.1	115041
508	8604.56	16034.8	33768.6	42090	58472.8	80086.6	114839
509	8625	16090.1	33785	41963.4	58681.7	79978.6	115008
510	8556.35	16109.5	33947.6	42015.9	58428.9	79978.1	115241
511	8646.48	16088.7	33809.6	42124.1	58376.7	80018.4	115079
512	8589.53	16064.5	33870	41979.2	58264.9	80034.7	115051
513	8656.52	16063.3	33925.5	41959.2	58539.2	80053	114912
514	8617.85	16094.2	33942.4	42094.1	58511.9	80110.1	115280
515	8622.03	16035.3	33926.8	42142.7	58591.8	79971.5	115052
516	8644.14	16090.6	33875.4	42114.4	58636.9	80358.1	115018
517	8628.66	16065	33848.8	41972.7	58519.3	80296.2	115199
518	8649.13	16213.6	33990.6	42054	58532.7	80309	114941
519	8621.86	16047.3	33904.3	42151.5	58642.2	80332.1	115309
520	8620.94	16127.1	34057.7	42188.9	58660.7	80369.9	115343
521	8605.5	16092.8	33956.5	42126.8	58872.6	80296.3	115011
522	8668.6	16145.5	33986	42067.6	58693.8	80202	115201
523	8609.3	16128.2	33962.7	42089.8	58723.8	80209.7	115533
524	8610.21	16083.9	33859.1	42309.8	58729.9	80382.3	115205
525	8660.32	16128.4	34124.1	42168	58835.1	80509.5	115075
526	8654.21	16158.8	33982.6	42223.9	58752.7	80459.8	115502
527	8731.31	16224.8	33987.5	42227.8	58561.8	80459	115266
528	8638	16200.2	33964.3	42149.1	58805.6	80644.4	115330
529	8720.49	16216.9	33916.9	42334.2	58770.2	80521.4	115371
530	8713.25	16226.6	34004.8	42083.1	58804.8	80477.3	115166
531	8651.67	16119.6	34030.6	42199.6	58721.1	80628.6	115310
532	8711.67	16191.5	33996.6	42282.9	58852.3	80589.3	115386
533	8715.68	16194.9	34058.5	42273.3	58927.3	80557.2	115564
534	8687.04	16230.2	34164.6	42180.1	58700.3	80515.3	115312
535	8683.15	16301.7	34030.4	42373.4	58832.5	80544.5	115334
536	8618.22	16176.7	34042.8	42272.3	58818.9	80692.1	115463
537	8615.09	16291.8	34122.9	42318.7	58937.2	80755.1	115666
538	8717.95	16206.6	34034.9	42369.1	58798.4	80861.6	115485
539	8735.03	16258.1	34139.2	42329.9	58910.9	80920	115399
540	8692.43	16235.4	34075.1	42258.2	58774	80788.3	115191
541	8647.77	16249	34104.1	42283.7	58912.8	80802.6	115212
542	8722.56	16230	33956.7	42332	59069.5	80946.5	115587
543	8760.09	16275.2	34294.7	42404	58917.7	80773.8	115597
544	8810.19	16191.8	34120.1	42284.3	58853.8	80979.3	115193
545	8780.24	16244.1	34185.4	42272.4	58911.8	80676.2	115537
546	8722.92	16250.9	34161.7	42391.8	59012.2	81159.9	115446
547	8782.05	16226.6	34219.9	42343.7	59105.4	81246.3	115519
548	8699.81	16246.5	34108.7	42332.7	59149.7	80986.5	115738
549	8719.56	16200.4	34241.5	42479.1	59100.5	81108.2	115540
550	8739.02	16184.8	34179.7	42265.1	59152.6	81237.9	115501
551	8685.82	16287.1	34167.5	42363.6	59020.5	81025.9	115292
552	8748.62	16288.1	34192	42511.3	58958.4	81024.1	115697
553	8763.97	16257	34223.5	42409.1	59105.7	81175.6	115498
554	8775.34	16247.8	34169.6	42388.8	59149.5	81207.2	115457
555	8733.06	16299.3	34334.2	42392.5	59096.2	81249.7	115822
556	8791.38	16299.9	34292.5	42413.8	59090.7	81179.8	115733
557	8745.25	16298.8	34201.6	42472.2	59172.6	81257.9	115387
558	8735.68	16332.8	34175.8	42489.8	59128.8	81407.2	115762
559	8740.91	16311.8	34177.3	42369.6	59087.1	81341.3	115228
560	8820.01	16279.2	34262.4	42517.3	59144.4	81411.7	115439
561	8826.16	16330	34298.9	42420.7	58977.5	81235.9	115725
562	8781.85	16296.7	34406.7	42411.1	59288.2	81282.7	115708
563	8807.66	16389.2	34306.7	42453.1	59372	81381.7	115466
564	8727.31	16307.2	34336.8	42349.6	59323.1	81466.3	115434
565	8755	16350.4	34378.5	42312.9	59134.4	81460.1	115534
566	8779.58	16391.3	34379.2	42527.2	59403.3	81420.7	115643
567	8778.21	16194.9	34284.5	42495.4	59361.7	81479.8	115541
568	8827.87	16348	34339.8	42595.7	59173.9	81514.7	115563
569	8745.04	16343.9	34321.9	42488.5	59503.5	81519.1	115607
570	8788.21	16354.2	34385.6	42548.9	59203.4	81673	115720
571	8852.9	16387.7	34278.5	42418.3	59253.3	81538	115525
572	8831.69	16371.9	34282	42516.4	59331.8	81712.3	115905
573	8779.52	16302.8	34398.9	42402.7	59225.4	81761.6	115611
574	8831.09	16369.6	34329.7	42619.8	59345.7	81659.3	115803
575	8752.42	16422.3	34311.3	42362.5	59329.7	81559.4	115609
576	8841.53	16445.4	34421.4	42457.8	59349.4	81786.8	115524
577	8769.67	16271.6	34364.3	42539.2	59378.6	81657.5	115683
578	8809.17	16425.2	34414.9	42507.3	59359	81703.7	115598
579	8792.67	16336.3	34492.9	42588	59457.7	81819	115471
580	8837.8	16300.8	34470.1	42684.9	59467.8	81822.9	115697
581	8859.92	16395.9	34395.9	42588.1	59603.9	81790.2	115446
582	8792.6	16411.2	34400.4	42573.7	59501.1	81716.5	115677
583	8780.13	16406.2	34419.7	42677.1	59491.6	81737.9	115554
584	8826.85	16319.6	34481.6	42622.8	59501.1	81644.2	115912
585	8829.45	16490.7	34428.2	42565.2	59305.9	81639.9	115769
586	8835.25	16402.9	34380	42622	59475.4	81967.6	115635
587	8806.01	16426.7	34396.9	42693.1	59690.4	81856.8	115739
588	8810	16472.9	34533.4	42524.8	59514.8	81969.5	115746
589	8807.4	16429.4	34452.4	42587.3	59550.4	81899.5	115865
590	8842.01	16483.7	34415.7	42651.4	59473.1	81904.2	115783
591	8831.68	16408.1	34387.1	42688.5	59616.6	81950.1	115494
592	8891.15	16382.6	34466.3	42757.9	59660	81945	115658
593	8876.97	16437.4	34537.4	42667.6	59512.5	82038.5	115645
594	8851.58	16409.1	34448.8	42575.9	59513.8	82088.2	115767
595	8819.38	16451.1	34407.7	42689.5	59718.5	82158.8	116073
596	8874.88	16374.5	34499.1	42667.7	59704.8	82107.9	115707
597	8860.85	16418.2	34491.4	42764.9	59784.1	82081.7	115762
598	8907.76	16417.1	34584.9	42655.9	59660	82039.8	115920
599	8823.03	16495	34547.9	42797.5	59688.3	82023	115677
600	8866.65	16547.9	34614.1	42772.3	59769.7	82195.1	115657

## Sheet: Sheet2
Time(s)	0.468uM DAP	0.937uM DAP	1.875uMDAP	3.75uM DAP	7.5uM DAP	15uM DAP	30uM DAP
0	5868.89	6673.6	9060.11	10571.9	18204.1	29767.6	45796.5
1	5900.49	6670.52	9194.72	10697.2	18678.9	30141.7	46194.9
2	5900.2	6685.77	9345.29	10867.6	18888.2	30506.7	46472.1
3	5875.56	6751.6	9457.09	11051.4	19102.6	30936	46987.7
4	5919.51	6749.19	9567.28	11212.2	19252.1	31357.3	47377.2
5	5934.6	6792.2	9736.21	11377.1	19475.9	31873.9	47940.7
6	5944.2	6778.34	9853.75	11585.4	19793.2	32168.9	48260.2
7	5953.26	6795.43	10057.1	11757	20053.7	32438.4	48519.7
8	5925.39	6761.25	10136.8	11952.7	20352.6	32878.2	48975.2
9	5975.11	6814.46	10235.5	12168.8	20583.3	33376.8	49531.5
10	5940.01	6822.42	10408.7	12353.2	20970.4	33620.9	49724.2
11	5980.34	6881.84	10555.2	12532.3	21275.8	33982.5	50243.8
12	5973.66	6846.8	10761	12697.8	21591.8	34211.2	50676.4
13	5996.59	6892.93	10796.5	13000	21989.5	34490.3	51029
14	5960.4	6938.06	10977.1	13216.5	22255.3	34951.5	51320.8
15	5975.79	6944.44	11061.5	13395.4	22640.9	35246.5	51913.4
16	6004.03	6934.31	11295.7	13519.5	22946.4	35727.9	52564.6
17	6084.01	6934.74	11429.6	13666.3	23322.6	35959.7	52945
18	6021.65	7001.56	11615.5	13874.3	23508	36275	53500.5
19	6047.6	7032.53	11702.6	14043.8	23848.5	36560.5	54429.4
20	6061.31	6998.56	11906.2	14189.6	24170.2	36851.6	55228.2
21	6084.27	7038.29	12000.6	14470.5	24505.3	37097.6	55847.8
22	6099.21	7089.02	12116	14613.4	24751.9	37498.9	56647.7
23	6091.4	7050.53	12277.2	14729	25078	37648.5	57380.2
24	6109.83	7095.99	12419.5	14871.8	25422.2	37889.5	58156.7
25	6152.47	7094.27	12607.6	15069.5	25724.8	38291	58942.9
26	6169.59	7140.16	12666.4	15221.9	26064	38683.1	59618.9
27	6085.49	7167.16	12773.6	15350	26391.3	39005.5	60496.3
28	6148.7	7228.38	12945.2	15565.7	26541.5	39363.5	61041.8
29	6164.02	7233.05	13012.8	15676.9	26800.6	39837.7	61913.5
30	6099.27	7280.85	13178.5	15956.8	27080.5	40187.5	62514.2
31	6126.09	7289.91	13311.8	16045.9	27514.9	40267.8	63161.3
32	6113.8	7310.42	13350.4	16326	27664.4	41021.2	63898.4
33	6102.57	7337.02	13493.8	16483.6	27968.6	41212	64374.9
34	6082.78	7322.41	13681.5	16707.5	28220.3	41410.5	65074.5
35	6089.1	7356.82	13788.4	16935.6	28368.2	41889.4	65626.2
36	6097.04	7361.29	13889.2	17043.9	28606.9	42119.1	66208
37	6079.12	7380.9	14018.9	17367	28880.9	42625.6	66646.6
38	6111.54	7411.1	14072.2	17431.8	29145	43026.2	67189.6
39	6143.11	7401.41	14213.8	17796.5	29340.4	43256.4	67719.5
40	6158.5	7423.36	14310.4	17896.9	29575.8	43598.7	68193.6
41	6150.79	7393.99	14436.6	18127.5	29836.1	44010.2	68570.3
42	6148.96	7427.07	14622	18310.4	30190.9	44409.8	69269.1
43	6181.31	7452.93	14595	18562.9	30283.7	44628.6	69332.7
44	6199.86	7440.64	14739.7	18659.6	30586.9	44836.9	69908.5
45	6190.22	7491.31	15002.4	18954.3	30706.3	45265.5	70338.9
46	6170.4	7539.76	15038.2	19050	30880	45703.2	70787.5
47	6225.28	7567.92	15210.3	19161.8	30990	45981.3	71315.7
48	6220.96	7569.2	15299.9	19498.9	31335.7	46209.3	71687.7
49	6180.63	7629.89	15454.2	19614.9	31469.1	46581.9	71909.1
50	6198.97	7623.25	15448.3	19868.9	31730.6	46883.8	72258.5
51	6217.44	7627.11	15647.5	20047.6	31922.8	47190.4	72973.6
52	6234.59	7688.96	15733.3	20173.7	32135.1	47694	73102
53	6216.03	7713.47	15763.4	20406.9	32332.7	47764.7	73660.1
54	6238.22	7736.75	15989.8	20558	32498.2	48113	73893.2
55	6245.3	7795.55	16053.3	20664.9	32538.7	48566.7	74102.3
56	6276.39	7825.01	16185.3	20848.7	32921.9	48723.1	74784.7
57	6291	7801.08	16287.2	20963.1	33097.7	48900.9	74850.3
58	6217.05	7857.26	16282	21207.6	33168.1	49270.5	75202.7
59	6252.99	7859.32	16497.7	21282.9	33358.7	49521.5	75456
60	6241.21	7911.65	16566.3	21445.2	33582.5	49733.1	75693.8
61	6254.59	7898.81	16588.6	21630	33906.7	50118.6	76021.6
62	6219.13	7946.74	16783	21620.3	33938.4	50417.6	76404.1
63	6264.36	7964	16892.4	21870.2	34162.4	50653.3	76770.6
64	6304.35	8015.43	17068.5	22009	34391.4	50800.6	76874.1
65	6274.24	8055.93	17130.4	22242.8	34515	51145.9	77041.5
66	6334.34	8094.77	17319.8	22411.4	34804.7	51509.4	77471.6
67	6355.52	8127.08	17294.2	22599	35006.8	51566	77684.8
68	6296.6	8126.27	17451.5	22652.3	35083.8	52066.3	78102.3
69	6283.18	8108.09	17434	22835.8	35310.6	52055.6	78291.4
70	6305.94	8196.65	17633.9	23098.3	35494.3	52455.1	78390
71	6377.96	8233.42	17683.4	23174.9	35758.6	52645.6	78742.9
72	6321.43	8183.32	17747.2	23300.9	35809	52918.4	78865.8
73	6368.36	8166.84	17845.6	23428.6	35956.6	53273.2	79277.9
74	6328.32	8287.39	17838.5	23576	36208.5	53365.3	79454.8
75	6327.92	8331.93	17928.5	23793.2	36432.9	53572.5	79690.2
76	6340.91	8350.06	18096.2	23764.2	36619	53791.1	79958.1
77	6320.65	8407.72	18086	23945.5	36666.6	53973	80211.2
78	6345.73	8465.14	18216	24098.7	36725.8	54398.6	80431.2
79	6349.76	8394.28	18381.5	24289.8	37125	54498.6	80452.1
80	6348.14	8457.69	18446.1	24299.1	37267.5	54887.1	81106.5
81	6319.15	8476.78	18541.6	24504.3	37453.1	54846.1	80956.3
82	6441.26	8508.05	18551.1	24645.3	37542.9	55107.2	81337.4
83	6360.79	8609.76	18671.8	24664.4	37696.7	55384.2	81288.3
84	6373.87	8549.27	18765.1	24761.9	37802.7	55510.6	81454
85	6385.13	8586.42	18838.8	24932.4	38097.5	55850.7	81766.1
86	6447.8	8605.32	18993.4	25145.5	38278.2	55946.5	82033.5
87	6445.41	8695.43	19038.4	25176.4	38494.2	56026.5	82072.2
88	6424.74	8679.54	19110.8	25406.5	38494.4	56232.3	82137.9
89	6443.65	8696.62	19127.6	25493.6	38667.2	56304.6	82516.6
90	6456.43	8798.66	19236.2	25410.5	38829.5	56472	82724.8
91	6436.45	8741.29	19314.9	25685.7	38890.1	56519.5	82868.1
92	6450.88	8821.35	19513.7	25761.2	39174.3	56813.7	83184.9
93	6461.89	8825.6	19532.4	25894.3	39413.6	56895.9	83254.4
94	6484.75	8921.12	19600.1	26124.4	39394.2	56934.4	83419.3
95	6515.82	8900.64	19767.9	26166.7	39516	57163.2	83820
96	6512.72	8962.39	19813.1	26304.1	39786.2	57354.5	83981.5
97	6460.02	8930.72	19907.1	26414.2	39826.7	57476.6	84092
98	6467.4	8982.21	20022	26492.9	39936.3	57678	84418.5
99	6475.32	9032.35	19995.2	26696.2	40098.9	57666.2	84574.8
100	6522.6	9109.76	20176.2	26728.8	40366.2	57707.1	84945.7
101	6487.33	9143.05	20241.8	26855.9	40429.6	57860.4	85207.6
102	6521.07	9155.18	20272.2	27076.5	40553.5	58080.2	85213.9
103	6510.62	9148.32	20321.5	27062.3	40718.4	58040.1	85362.5
104	6517.87	9172.19	20448.9	27130.7	40835.3	58310	85515.8
105	6535.44	9294.95	20613.2	27396.6	40967.9	58341.1	85984.9
106	6530.23	9314.73	20528.5	27380.6	41182.5	58473.6	86027.8
107	6522.66	9287.32	20584.6	27555.3	41107.6	58416.8	86489.5
108	6530.67	9319.58	20696.1	27587.1	41325.6	58848.2	86457
109	6574.93	9401.94	20804.3	27706.8	41523.2	58825.3	86923
110	6561.49	9343.57	20902.6	27921.4	41735.4	58890.7	86764.6
111	6549.84	9421.18	20983.9	27961	41813.2	58976	87126.3
112	6600.49	9480.2	21082.5	28086.1	41953.9	59067.7	87236.5
113	6592.47	9439.39	21071.8	28283.1	42128.6	59142.2	87552.8
114	6576.71	9501.51	21185.1	28362.2	42227.3	59325.2	87596.7
115	6614.19	9546.28	21221.8	28425.5	42407.5	59458.1	87890.1
116	6565.6	9563.73	21349.7	28625.7	42534.8	59486.3	88310.2
117	6603.95	9571.9	21357.6	28691	42593.1	59569.4	88509.7
118	6622.03	9579.65	21376.5	28735.2	42586.7	59810	88601.2
119	6634.07	9660.93	21506.3	28865.1	42783.3	59812.4	88955.6
120	6606.42	9625.32	21568.3	28946.3	43017.8	59982.8	89120.6
121	6634.48	9686.69	21631.2	28951.3	43107.2	59895.7	89321.4
122	6633.61	9741.67	21650.5	29142.7	43144.3	60174.9	89416.2
123	6645.32	9774.7	21725.7	29265.6	43260.4	60227.7	89705.3
124	6591.82	9873.77	21839.5	29280.5	43483.7	60359.6	89709.7
125	6658.91	9860.06	21848.6	29435.2	43535.6	60375.8	90007.3
126	6656.5	9837.67	21981.4	29592.6	43597.5	60622.9	90248.1
127	6714.25	9964.31	22073.4	29669.7	43761.5	60723	90351.7
128	6705.55	9965.14	22060.6	29653.1	43902.6	60913.6	90583.2
129	6704.94	10003.8	22168.7	29839.5	44012.1	60795.3	90786.4
130	6694.32	10014.6	22177.1	29978.7	44162.5	61049.7	90831.9
131	6743.78	10046.8	22291.8	30144.8	44163.7	61183	91094.3
132	6730.4	10064	22356	30120.7	44299.2	61179.2	91333.2
133	6740.69	10100.3	22409.8	30173.9	44462.2	61332.5	91168.1
134	6731.13	10126.1	22428.5	30226.1	44584	61456.2	91713.6
135	6830.05	10117.3	22497.9	30283.2	44656.4	61395.4	91759.1
136	6792.26	10173.6	22601	30486.7	44764.9	61634.4	91757.6
137	6745.85	10207.4	22601.6	30591.5	44944.9	61636.9	91947.6
138	6802.9	10271.1	22742.2	30776.5	44963.4	61740.1	92347.1
139	6819.55	10262.8	22914.3	30731.8	45100.4	61903.9	92307.5
140	6797.19	10296.4	22922.4	30780.3	45100.8	62056.9	92550
141	6826.82	10369.3	22869.8	30997.7	45315.7	62122.7	92622.5
142	6845.84	10387.1	23002.3	30981.7	45390.2	62141.7	92799.7
143	6826.99	10482	23111.6	31104	45524	62149	93099.8
144	6826.68	10392.9	23169.2	31193.6	45579.7	62429.1	92944.5
145	6770.41	10503.8	23192.9	31345	45600.6	62431.3	93308.7
146	6774.28	10511.4	23247.2	31321.2	45596.1	62341.3	93226
147	6875.3	10574.5	23274.2	31469.3	45626.6	62460.6	93512.2
148	6829.48	10608.6	23403.8	31513.5	45761.2	62657.8	93568.7
149	6892.75	10556.6	23333.4	31550.7	46155.7	62685.1	93918.6
150	6816.84	10666.3	23541.7	31723.4	46038.2	62759.2	94008.1
151	6812.39	10617.3	23556.9	31696.7	46245.2	62984	94328.8
152	6790.19	10695.6	23637.9	31816.1	46190.8	63103.8	94419.8
153	6874.1	10800	23792.7	31969.2	46446.1	63154.9	94544.1
154	6901.31	10826.3	23814.3	31941	46399.7	63168	94598.6
155	6911.99	10786.7	23921.7	32114.4	46457.6	63264.3	94930.7
156	6884.19	10810.2	24009.7	32254.3	46606.1	63380.1	94999.5
157	6866.64	10871.7	24154.5	32218.8	46608	63332.2	95062.5
158	6854.52	10916.3	24219.6	32268.3	46736.6	63593	95362.8
159	6919.94	10919	24221.1	32406.3	46681.6	63372.1	95459.1
160	6905.63	10938.2	24322.9	32463.1	46908.5	63641.4	95951.3
161	6936.53	10981.2	24458.3	32415.1	47109.2	63833.5	95995.9
162	6885.31	11022.1	24526.1	32567.7	47117.1	63871.4	96214.4
163	6964.64	11106.5	24561.7	32655.2	47194.4	63886.5	96199.8
164	6930.86	11114	24641.6	32758.9	47121.4	64110.6	96282.9
165	6917	11093.2	24737.6	32820.9	47200.7	64163.1	96368.3
166	6996.9	11169.3	24776.3	33019.2	47296.5	64232.3	96719.9
167	6922.6	11172.4	24936.4	32817.1	47312.5	64278.4	96951.5
168	6974.99	11122.7	24960	32950.6	47533.1	64502.1	97205.9
169	6966.75	11288.6	25002.6	33020	47441.3	64450.1	97185.5
170	6979.07	11217.3	24952.1	33133.3	47548.4	64637	97336.4
171	6985.65	11245.7	25111.6	33149.9	47683.3	64833.7	97349.9
172	6921.91	11263.8	25188.9	33189	47743.7	64916.8	97774.5
173	6972.57	11294	25177.1	33368.3	47786.7	65083.3	97832.3
174	6979.35	11322.8	25250.3	33375.3	47849.7	65030.9	98027.5
175	6981.35	11366.1	25172.4	33503.8	48015	64999.5	98197
176	6971.81	11442.9	25179.8	33375.8	48172.2	65199.5	98288.9
177	6991.82	11408.8	25228.8	33561.9	48338.4	65351.9	98579.6
178	6969.69	11452.7	25290.6	33571.9	48242.7	65328	98537.2
179	7008.04	11508.5	25455.8	33629.8	48380.8	65303.8	98985
180	7043.98	11499.7	25467.1	33675.8	48478.6	65461.7	99225.4
181	7011.81	11628.4	25434.6	33711.9	48529	65518.9	99079.9
182	7013.1	11614	25446.4	33849.3	48467	65616.1	99083.5
183	6981.64	11643.1	25509.5	33949.6	48602.9	65825.9	99357
184	7041.18	11668.9	25652.6	34007.4	48590.4	65881.3	99375.5
185	7062.55	11646.4	25684.5	34032.2	48875	65845.2	99466.1
186	7108.39	11629.1	25743.1	34151.2	48807.1	65955.5	99804.2
187	7098.03	11727.2	25783	34278.5	48912.1	65976.7	99921
188	7093.21	11739	25831.5	34273.5	49058.7	66152.9	99936.3
189	7033.76	11795	25797	34317.8	49128.8	66066.2	99985.7
190	7121.27	11745.6	25840.2	34240.6	48992.6	66059	100080
191	7057.78	11867	25958.7	34358.9	49194.8	66220.3	100364
192	7070.64	11842	26071	34516.5	49310.6	66435.2	100203
193	7114.98	11821.1	26126.9	34657.1	49232.1	66331.6	100467
194	7126	11872.6	26131	34566.4	49268.2	66207	100578
195	7098.29	11948	26265.4	34620.7	49437.5	66555.5	100729
196	7117.22	11955.6	26280.2	34608.5	49527.9	66512.9	100936
197	7174.54	11956.6	26186.7	34689.1	49626.7	66516.9	101205
198	7140.93	11950.3	26354	34720.9	49545.6	66778.3	101065
199	7141.52	12044.5	26321.9	34853.7	49766.6	66696.1	101035
200	7162.48	12062.4	26455.8	34816.2	49730.4	66583.7	101271
201	7073.06	12062.8	26474.6	34955.4	49747.1	66822.9	101213
202	7160.88	12021.7	26539.9	34893.9	49959.4	66881.8	101131
203	7133.31	12165.4	26545.3	34998.7	49971.1	66862.4	101576
204	7125.65	12143.2	26601.5	35039.9	49950.4	67015.1	101472
205	7157.61	12126.4	26681.5	35076	50053.3	67049.9	101661
206	7175.16	12229	26724.5	35186.7	50066	67036.3	101782
207	7230.81	12231.5	26770.3	35279.9	50203.1	67119.3	101815
208	7249.94	12202.1	26871.9	35361.5	50172.3	67184.2	101899
209	7199.77	12320.1	27008.3	35309.8	50313.3	67284.3	102064
210	7207.6	12263.3	26862.9	35453.3	50209.9	67315.9	101947
211	7214.96	12452.5	26984.9	35451.9	50211.8	67372.8	102139
212	7213.95	12332.2	27050.3	35447.8	50340	67211.5	102275
213	7208.73	12423.5	27079.9	35411.5	50283.3	67628.3	102438
214	7188.69	12356.9	27187.1	35501.3	50576.7	67595.5	102380
215	7241.34	12415.1	27265.1	35609.8	50424	67490.9	102570
216	7196.23	12466.9	27198.6	35579.4	50538	67650.2	102709
217	7191.11	12457.3	27320.1	35826.5	50549.3	67651.9	102830
218	7241.73	12545.8	27330.2	35778.5	50569.3	67687.5	103079
219	7217.43	12507.6	27309	35749.1	50730.6	67745.1	103071
220	7286.51	12564.3	27423.3	35913.7	50738	67843.7	103115
221	7262.09	12605	27530.4	36046	50820.7	67904.4	103025
222	7257.55	12556.5	27470.4	35874.4	50841	67812.2	103202
223	7304.32	12592.2	27564.7	35974.9	50930.4	68040.2	103220
224	7308.21	12615.6	27605	36002.1	50950.3	68037.5	103172
225	7303.96	12697.2	27588.3	36089.1	50992.6	68022.4	103369
226	7253.09	12716.4	27577.5	36108	50904.2	68192.4	103548
227	7287.2	12663.3	27709.4	36304.1	51104.3	68124.7	103582
228	7245.49	12639.9	27777.5	36117.4	51092.5	68226.1	103548
229	7269.5	12703.4	27798.9	36057.8	51006.1	68172.3	103856
230	7258.51	12758.9	27777.4	36246.3	51175	68359.5	103765
231	7347.21	12786.3	27960.7	36322	51161.7	68274.3	103974
232	7352.49	12740	27893.4	36389.2	51110.5	68574.4	103945
233	7261.62	12768.3	27977.7	36375.1	51126	68595.4	104107
234	7307.92	12868.4	28061.6	36439.6	51331.9	68503.4	104204
235	7381.78	12864.8	27998	36384.5	51495.6	68466.8	104034
236	7334.37	12932.5	28074.8	36482.1	51391.8	68713	104375
237	7342.64	12865.3	28129.9	36486.5	51433.4	68684.5	104429
238	7372.63	12934.7	28083.7	36488.6	51497.6	68764	104503
239	7324.83	12966.7	28153.2	36684.7	51311.9	68720	104430
240	7396.07	12910	28220.4	36636.5	51441	68953.2	104584
241	7332.64	13000.9	28311.7	36723.1	51609.2	68928.2	104790
242	7331.12	13083	28267.5	36616.3	51426.5	68942.4	104731
243	7452.04	13024.2	28427.6	36663.1	51644.6	68988.3	105017
244	7430.41	13032.4	28426.5	36778.4	51563.8	69121.8	105008
245	7437.82	13025.6	28549.5	36972.4	51713.3	69027.3	104901
246	7458.99	13068.7	28378.4	36744.9	51672	69286.4	105091
247	7386.17	13099.6	28557.7	36904.1	51814.1	69324.1	105268
248	7427.91	13100.6	28523.2	36924.6	51676.4	69373	105037
249	7409	13082.6	28671.5	36980.3	51824.5	69302.2	105268
250	7354.96	13133.9	28700.2	37000.7	51767.9	69636.1	105389
251	7414.15	13208.2	28675.3	37102.8	51817.9	69571.8	105324
252	7373.46	13185.8	28729.6	37100.8	51949.9	69489.8	105500
253	7449.21	13195.9	28680.4	37095.1	51993.6	69823.7	105801
254	7416.16	13227.8	28729.1	37186.8	51958.9	69853.9	105702
255	7445.27	13226.6	28827	37171.7	52080.1	69779.5	105875
256	7499.38	13346.9	28827.6	37309.2	52007.7	69697.6	105931
257	7482.86	13290.8	28873.8	37243.9	52005.6	70091.6	106086
258	7499.5	13289.3	29018.8	37452.6	52115.1	69954.8	106210
259	7512.28	13266.5	28952.2	37403.7	52286.7	70076.4	106227
260	7529.08	13298.4	28988.1	37368	52067.6	70069.9	106158
261	7494.97	13348.9	29057.2	37416	52368	70190.8	106136
262	7542.36	13302.7	29014.8	37418.3	52258.8	70274	106405
263	7484.89	13416.8	29049.9	37538.4	52346	70136.7	106638
264	7518.94	13475.4	29159.5	37557.1	52400.1	70256.7	106560
265	7497.25	13376.4	29214.3	37612.9	52547.7	70401.7	106559
266	7528.53	13538.2	29194	37661.2	52395.3	70368.2	106675
267	7514.44	13521.3	29236.6	37746.4	52372.2	70543.9	106927
268	7544.15	13568.2	29338.6	37711.3	52588.4	70461.1	106866
269	7553.51	13498.3	29303	37824.2	52621.8	70372.7	106936
270	7530.43	13572.6	29274.4	37849.6	52633.4	70519.3	106941
271	7520.47	13592.6	29451.6	37786.8	52511	70799	107025
272	7488.72	13555.8	29361.3	37933.8	52622.3	70700.4	107139
273	7576.65	13543.3	29462.9	37822.7	52648.6	70836	107320
274	7548.24	13632	29635.8	38065.7	52742.4	70786.4	107326
275	7629.58	13621.3	29601.2	37880.9	52728.4	70821.5	107696
276	7626.42	13578.2	29552.6	37984.5	52745	70862.7	107565
277	7632.68	13683.5	29597.9	38020.6	52842.8	70986.1	107597
278	7602.29	13644.7	29587.5	38083.7	52874.6	70969.7	107723
279	7605.41	13627.9	29726.4	37933.4	52998.8	71064.3	107778
280	7629.51	13685.2	29636.5	38197.9	52938.9	71025.3	107845
281	7701.54	13724.1	29809.9	38032.2	52971	71222	107793
282	7643.91	13763.7	29725.6	38201.6	53072.6	71246.3	107998
283	7644.25	13823.6	29723.7	38111.4	53081.1	71269.6	108000
284	7687.78	13835.4	29826.4	38229.3	52896.7	71571.6	108149
285	7583.12	13816.8	29734.6	38252.1	53052.4	71522.2	108187
286	7624.32	13771.4	29957.4	38283.1	53086.7	71562.1	108075
287	7665.9	13791	29965.3	38288.1	53213.4	71634.1	108428
288	7744.2	13908.1	29950	38300.6	53121.6	71580.5	108116
289	7670.3	13867.2	29866.7	38466.1	53268	71498.4	108397
290	7666.76	13860.7	30059.4	38281.6	53385.9	71584.8	108545
291	7655.21	13901	30145.6	38391.3	53469.8	71785.9	108345
292	7655.98	13837.1	30137.6	38436.6	53333.8	71754.3	108721
293	7681.93	13955.8	30135.3	38410.6	53340.1	71574	108615
294	7712.12	14041.2	30206.3	38642.1	53484.7	71615.3	108721
295	7685.89	14002.7	30187	38497.5	53288.5	71909	108794
296	7682.48	13973.7	30266.5	38579.9	53487.4	71943	108814
297	7738.03	13940.8	30137.2	38571.7	53448.1	71908.3	108748
298	7738.61	14038	30134.1	38646.1	53478.3	72030.1	108819
299	7726.49	13993.8	30209.4	38585.9	53499.3	72138.2	108894
300	7738.7	14077.3	30377.5	38508.3	53471.1	71988.5	109092
301	7751.65	14127.6	30260.1	38516.6	53550.6	72299.3	109300
302	7748.16	14070	30281.8	38747.1	53621.4	72285.6	109067
303	7738.46	14073.9	30353.7	38855.7	53699.7	72299.5	109035
304	7732.42	14135.8	30528.6	38731.4	53736.2	72338.8	109413
305	7752.05	14077.2	30466.8	38894.1	53671	72528.4	109271
306	7819.11	14133.6	30437.1	38897.3	53790.5	72348	109333
307	7737.07	14213.8	30444.2	38796.4	53716.5	72436.1	109244
308	7759.81	14186.5	30460.5	38792.7	53875.1	72401.6	109477
309	7808.9	14177	30515.2	38815.9	53857.3	72373.2	109480
310	7708.9	14204.8	30523.3	38840	53800.3	72651.8	109590
311	7779.61	14158.8	30583.5	38952.2	53867.2	72652.6	109783
312	7849.57	14218.2	30622.2	38917.2	53989.4	72925.7	109592
313	7758.39	14218.4	30679.6	38994.7	53947.1	72656.1	109806
314	7783.27	14361	30553.5	39067.4	53980.2	72759.5	109853
315	7822.59	14282.3	30706.9	38964.2	53853.5	73058.6	110103
316	7821.63	14307.5	30648.2	39124.5	54024.8	72996.1	110125
317	7785.83	14247.5	30750.5	39176.3	53857.2	73054.5	110152
318	7775.45	14304.5	30820.8	39111	54121.8	73192.8	110131
319	7805.19	14253.5	30771.9	39096.6	54116.9	73261.1	110265
320	7824.63	14399.4	30887.1	39145.6	54052.6	73090.3	110030
321	7866.64	14385.5	30870.7	39101.9	54109.3	73388.8	109991
322	7831.41	14438	30834.7	39271.8	54236.7	73297.2	110181
323	7886.95	14380.6	30761.8	39240.4	54107.3	73368.2	110485
324	7862.12	14441.3	30859.9	39295.3	54162.9	73202.1	110290
325	7882.77	14386.7	31006.5	39368.1	54235.5	73444.4	110291
326	7872.5	14512.2	31084.4	39317.6	54361.9	73367.4	110430
327	7843.92	14365.8	31072	39317.5	54216.2	73496	110298
328	7868.46	14396.8	31041.6	39399.4	54354.8	73749.5	110338
329	7851.05	14447.5	31074.9	39320.1	54386	73539	110624
330	7907.37	14482	31066.1	39460.7	54462.7	73510.9	110432
331	7902.4	14529.3	31068.9	39428.1	54434.9	73775	110689
332	7912.66	14550.9	31203.4	39394.4	54427	73691.2	110594
333	7901.85	14485.7	31072.2	39421.1	54400.3	73592.2	110684
334	7904.15	14560.4	31273.6	39680.7	54584.7	73902.1	110730
335	7892.95	14482.1	31117.8	39537	54420.3	73974	110735
336	7941.85	14573.6	31198	39552.1	54536.9	74018	110933
337	7911.26	14579.3	31276.4	39581.3	54695.4	74093.1	110944
338	7959.09	14535.8	31240.7	39548.7	54617.1	74060.5	110675
339	7936.83	14636.2	31329.9	39602.6	54489.3	74188.8	110766
340	7950.16	14628.8	31196.3	39596.2	54494.2	74145.1	110805
341	7977.93	14569	31293.6	39585.8	54536.9	73889.4	111061
342	8004.46	14727.4	31324.9	39703.1	54594.9	74267.7	110934
343	8009.03	14619.9	31345.1	39723.6	54659.5	74228.1	110912
344	7955.23	14673	31483.1	39681.2	54680.8	74293.3	111299
345	7916.37	14668.3	31371	39700.5	54736.9	74473.7	111236
346	8020.94	14667	31478.4	39707.2	54768.4	74431	111458
347	7972.54	14591.6	31400.7	39697.6	55007.9	74328.1	111179
348	7939.32	14718.4	31519.9	39876.8	54897.5	74613.1	111601
349	8006.05	14755.1	31566.9	39784.7	54767.5	74481.8	111222
350	7942.04	14779.3	31459.1	39793.9	54852	74505.7	111348
351	8057.06	14688.5	31617.3	39835.2	54874.4	74633	111506
352	7972.87	14792	31502.8	39959.6	54902.1	74576.5	111404
353	8003.58	14785.1	31598.5	39879.5	54908.2	74620.9	111382
354	7957.45	14732.4	31495.6	39868.3	55002	74792.5	111516
355	7998.85	14768.3	31635.7	39824	54924.5	74716.4	111451
356	8046.37	14792.8	31591.7	39968	55087.4	74721.3	111473
357	8028.78	14861.5	31568.4	39869.9	54961.5	74778.4	111644
358	8063.89	14836.4	31683.7	39922.6	55036.8	75032.8	111494
359	8050	14852.3	31696.8	39916	55170.5	74955.4	111545
360	8021.04	14934.8	31811.4	40015.4	55221.7	74942.4	111860
361	8044.35	14834.1	31765.8	40053.3	55324.5	74932.4	111670
362	8015.59	14878.5	31745	40081.8	55151.9	75229.8	111707
363	8074.41	14915.7	31815.4	40085.6	55384	75118.3	111678
364	8051.42	14947.7	31907.1	40139.5	55246.8	75259.9	111612
365	8043.52	15007.4	31894.6	40115.9	55323	75232.7	111776
366	8067.73	14974.7	31823.2	40071.1	55238.3	75366.2	111832
367	8069.32	14952.8	31861.1	40238.3	55330.9	75211.2	111802
368	8035.96	14872.5	31845.9	40194.2	55297.2	75232.4	111699
369	8039.57	14981.3	31955.7	40133.4	55462.8	75301.4	111847
370	8040.11	14999.6	31972	40269.8	55321.6	75338.9	111629
371	8080.61	14909.2	32000.2	40277.9	55410.8	75276.3	112029
372	8085.45	14979.3	32060.2	40277.4	55339.3	75361.4	111956
373	8102.6	14937.1	31973.1	40233.3	55608.8	75299.7	111984
374	8034.91	15096.6	32094.2	40242.3	55649.9	75341.8	112015
375	8051.97	14958.9	32000.5	40406.1	55646.4	75427.6	112141
376	8138.74	15016	32007.8	40391.9	55644.5	75558.6	112052
377	8093.08	15088.6	32110.2	40332.1	55660.1	75788.3	111942
378	8066.85	14990.5	32056.4	40450.9	55543.4	75678.7	112077
379	8088.98	15064.3	32077.5	40364	55770.5	75686.7	112125
380	8129.59	15111.4	32029.4	40527.1	55773.9	75858.7	112364
381	8156.93	15026.7	32055	40410.7	55752	75820.5	112335
382	8124.7	15029.3	32095.9	40417.2	55725.2	75804.2	112332
383	8144.54	15062.4	32259.1	40476.8	55909.5	75929.3	112156
384	8129.91	15084.7	32267.3	40467.2	55854.2	76022.8	112433
385	8120.98	15146.8	32050.2	40503.1	55833	76040.8	112289
386	8132.67	15171.7	32130.4	40500.5	55860.5	76043.9	112381
387	8170.37	15227.4	32232.2	40648.8	55906.8	75840.9	112541
388	8140.69	15125.9	32279.2	40572.8	55895.2	76050.7	112328
389	8129.78	15216.6	32349.8	40577.8	55764.5	76074.9	112627
390	8236.55	15131.3	32167.7	40628.3	55992.5	76239	112548
391	8159.46	15214	32327.9	40625.8	56041.6	76334.1	112543
392	8110.56	15206.1	32265.7	40571.7	56067.8	76207.2	112685
393	8222.56	15221.7	32316.7	40701.2	55973.3	76223.5	112516
394	8239.99	15241.1	32350.2	40736.5	56030.5	76287.4	112611
395	8207.84	15199	32388.4	40686.4	56059.9	76292.6	112508
396	8155.18	15266.8	32389.8	40670	56036.9	76358	112714
397	8213.7	15237.1	32406.5	40754.9	56078.4	76453.3	112803
398	8221.15	15311.8	32409.2	40772.9	55983.4	76445.7	112527
399	8231.31	15242.2	32498.9	40867.4	56141.9	76372.6	112718
400	8235.81	15207.8	32507.6	40747.6	56171.7	76573.9	112684
401	8231.03	15302.9	32558.2	40713.4	56320.7	76561.9	112735
402	8201.89	15281.6	32573.4	40782.1	56177.6	76612.7	113112
403	8234.42	15278.8	32470.2	40776.5	56354.8	76735.4	112739
404	8198.37	15400.6	32536.2	40856.3	56216.9	76676.5	112994
405	8211.75	15249.9	32669.7	40872.4	56294.3	76589.5	112973
406	8225.32	15305.3	32560.6	40926.9	56327.4	76611.6	112967
407	8249.27	15393.1	32654.6	40772	56245.3	76772.7	112889
408	8241.85	15267.3	32686	40899	56405.3	76908	112980
409	8260.08	15325	32575.7	40927.1	56329.3	76758.1	113143
410	8266.68	15332.3	32617.8	40873.1	56388.3	76891	113061
411	8265.15	15372.5	32625.6	40747.9	56551.9	77078.3	113194
412	8227.03	15402.8	32734.3	40837.4	56403.9	76937.6	113080
413	8278.87	15360.9	32699.3	40992	56456.1	76951.8	113120
414	8306.49	15373.2	32590.2	40900.6	56673.4	77031.3	113240
415	8262.21	15375.7	32818.3	41039.2	56645.2	77090.6	113076
416	8317.06	15388.2	32776.5	40887.2	56560.2	77045.2	112985
417	8247.25	15429.1	32700.1	41017.4	56556.7	77090.2	113191
418	8309.66	15484.3	32656.5	41071.2	56520.8	77051.5	113365
419	8273.21	15378.6	32780	41108.8	56512	77358.5	113283
420	8237.49	15461.7	32779.1	41087.7	56726.5	77195.8	113378
421	8274.22	15401.6	32758.2	41148.8	56700.6	77390.1	113236
422	8342.2	15418	32942	41103.7	56747.4	77227.3	113255
423	8293.19	15528.9	32833.2	41072.4	56627.3	77338.1	113330
424	8308.88	15531.2	32877	41155.9	56813.4	77550.4	113651
425	8326.32	15483	32787.8	41203	56673.2	77623.4	113424
426	8314.28	15538.1	32739.2	41223.7	56751.6	77566.7	113414
427	8342.77	15473.6	32920.1	41229.7	56939	77664.7	113463
428	8285.21	15492.8	32862.3	41172.6	56783.1	77491.1	113530
429	8356.34	15557.6	32942.9	41079.6	56868.7	77719.3	113689
430	8335.78	15598.7	32859.6	41326.4	56997.5	77569.1	113535
431	8368.18	15476.9	32882.4	41098.5	56865	77550.5	113604
432	8351.88	15599.4	32814.5	41098.1	56870.3	77686.6	113741
433	8377.12	15618.6	33098.1	41206.6	57110.9	77853.3	113767
434	8337.49	15625	32981.4	41404.4	56890.5	77693.4	113633
435	8373.54	15616.7	33000.8	41312.3	57028.2	77906	113597
436	8344.98	15538.7	33016.4	41220.3	56988.8	77717.1	113671
437	8273.25	15636.7	33020.6	41289.4	57062.5	78007.1	113838
438	8330.87	15568.4	33017.3	41254	57205.4	77983.6	113831
439	8395.49	15666.3	33019.6	41280.7	56970.8	77697.7	113775
440	8293.82	15653	33106.6	41298.6	57032.6	78019.8	113880
441	8267.4	15511.1	33197.8	41322.8	57136	78026.4	113714
442	8283.78	15558.3	33063.1	41329.3	57261.5	78068.3	114093
443	8351.04	15648.3	33027.1	41433.6	57012.3	77901.7	114070
444	8338.74	15672.5	33205.5	41381.9	57312.5	78151.7	114041
445	8395.96	15647.4	33081.5	41485.4	57302.3	78062.8	113950
446	8335.47	15663.6	33119.9	41315.2	57138.2	78243.5	114192
447	8394.62	15579.6	33164.9	41488.6	57189.2	78016.7	114104
448	8398.82	15661.6	33106.4	41562.6	57354.1	78275.2	114003
449	8451.64	15723.5	33091.9	41441.5	57333.4	78310.7	114062
450	8378.23	15664	33127.2	41476.6	57263.8	78291.4	114159
451	8394.74	15760.7	33312.4	41529.9	57294.2	78422.8	114198
452	8416.32	15726.5	33271.5	41399.3	57286.3	78367.9	114464
453	8402.42	15747.3	33233.5	41611.9	57330.9	78298.6	114243
454	8391.08	15764.5	33261.7	41388.4	57344.6	78240.8	114319
455	8373.16	15666.8	33275.5	41428.1	57394.2	78405.2	114211
456	8377.01	15601.5	33222.4	41508.7	57514.7	78439.2	114234
457	8441.64	15812.7	33284	41575.8	57554.1	78578.4	114331
458	8437.41	15797.7	33286.4	41551.7	57589.4	78426.2	114088
459	8441.26	15798.1	33205.4	41659.7	57514.6	78549.1	114234
460	8415.98	15766.5	33274.1	41413.2	57406.5	78613.1	114578
461	8424.52	15755	33350.4	41636.3	57558.3	78542.2	114341
462	8448.91	15853.7	33363	41468.2	57629.7	78557.1	114497
463	8435.17	15816.1	33324	41629.7	57495	78600	114452
464	8457.57	15785.4	33417.1	41601.2	57705.6	78791.8	114412
465	8486.03	15765.4	33373.2	41555.8	57669.6	78673.7	114405
466	8489.87	15911.3	33355.1	41714.3	57593.2	78799.4	114456
467	8460.66	15850.7	33365.5	41569.4	57696	78659.7	114350
468	8488.61	15783.4	33350.4	41650.9	57670	78659.5	114580
469	8422.82	15886.4	33467.8	41593.6	57790.8	78613	114428
470	8511.76	15840.2	33331.9	41727.4	57880.2	78931.8	114508
471	8460.59	15810.3	33299.4	41604.4	57808.2	78823.7	114261
472	8503.08	15904.4	33401.2	41589.8	57986.8	78863.4	114436
473	8525.36	15843.5	33475.3	41614.2	57813	78991.2	114525
474	8494.98	15840.2	33427.9	41637.3	57771	78930.2	114619
475	8455	15829.1	33434.2	41698.7	57906.2	79025.3	114451
476	8562.53	15872.7	33559.5	41674	58067.1	79010.2	114736
477	8516	15906.8	33516.5	41793.5	57802.9	79008.5	114501
478	8498.09	15925.8	33542.6	41830	57907.2	79196.6	114521
479	8560.81	15885.4	33697.9	41779.2	58073.3	79187	114580
480	8508.92	15890.7	33523.7	41708.4	58055.2	79126.6	114965
481	8477.16	15962.3	33511.3	41939.2	57769.2	79310.9	114737
482	8539.56	15943.1	33661.5	41768.3	57870.9	79204.2	114831
483	8485.78	15967.5	33601.6	41621.8	58127.6	79230.6	114561
484	8538.3	15960.2	33623.8	41875.9	57951.6	79362.6	114743
485	8519.14	15956.6	33609.8	41808.9	57952.1	79337.9	114718
486	8504.76	15915.7	33646.8	41720	58068.6	79342	114788
487	8501.1	15933.4	33704.8	41762.4	57905.2	79355.2	114710
488	8551.54	15936.2	33650.5	41786.1	58086	79402.8	114767
489	8565.98	15928	33659	41805.6	57962.8	79570.2	114881
490	8540.91	15950.3	33573.2	41822.4	58209.8	79501.5	114875
491	8553.56	15955.1	33562.3	41862	58109.4	79493.8	114723
492	8557.67	15957.6	33717.9	41907.6	58140.3	79490.8	115030
493	8562.63	15998.5	33649.3	41896.8	58269.4	79648.1	114837
494	8498.55	16007.2	33639.6	41910.4	58208.9	79520.6	114673
495	8567.66	15957.6	33680.9	41876.2	58105.4	79437.8	114907
496	8575.12	16063.3	33764.3	41639.6	58288.9	79486.1	114969
497	8557.2	15968.3	33653.4	41885.7	58227.2	79703.8	114880
498	8576.24	15914.3	33845.3	41865.5	58241.9	79696.7	114770
499	8615.77	16021.2	33835.6	41862.7	58216.2	79795.9	114830
500	8574.91	16063.4	33709.7	41960.8	58335.5	79711.4	115201
501	8569.38	16010.1	33836.4	42004.2	58335.4	79851.7	114862
502	8649.13	16058.8	33823.4	42032.1	58303.3	79807.6	115002
503	8561.96	16052.1	33735.8	41966.3	58344.3	80012.6	114926
504	8588.5	15965.7	33775.6	41965.9	58284.6	80013	114997
505	8597.57	16019.4	33818.8	41860.9	58332.5	79929.6	115152
506	8614.76	16148.5	33854.1	42009.5	58345.6	79776.4	114898
507	8551.06	16042.2	33856.7	41973.5	58229	79864.1	115041
508	8604.56	16034.8	33768.6	42090	58472.8	80086.6	114839
509	8625	16090.1	33785	41963.4	58681.7	79978.6	115008
510	8556.35	16109.5	33947.6	42015.9	58428.9	79978.1	115241
511	8646.48	16088.7	33809.6	42124.1	58376.7	80018.4	115079
512	8589.53	16064.5	33870	41979.2	58264.9	80034.7	115051
513	8656.52	16063.3	33925.5	41959.2	58539.2	80053	114912
514	8617.85	16094.2	33942.4	42094.1	58511.9	80110.1	115280
515	8622.03	16035.3	33926.8	42142.7	58591.8	79971.5	115052
516	8644.14	16090.6	33875.4	42114.4	58636.9	80358.1	115018
517	8628.66	16065	33848.8	41972.7	58519.3	80296.2	115199
518	8649.13	16213.6	33990.6	42054	58532.7	80309	114941
519	8621.86	16047.3	33904.3	42151.5	58642.2	80332.1	115309
520	8620.94	16127.1	34057.7	42188.9	58660.7	80369.9	115343
521	8605.5	16092.8	33956.5	42126.8	58872.6	80296.3	115011
522	8668.6	16145.5	33986	42067.6	58693.8	80202	115201
523	8609.3	16128.2	33962.7	42089.8	58723.8	80209.7	115533
524	8610.21	16083.9	33859.1	42309.8	58729.9	80382.3	115205
525	8660.32	16128.4	34124.1	42168	58835.1	80509.5	115075
526	8654.21	16158.8	33982.6	42223.9	58752.7	80459.8	115502
527	8731.31	16224.8	33987.5	42227.8	58561.8	80459	115266
528	8638	16200.2	33964.3	42149.1	58805.6	80644.4	115330
529	8720.49	16216.9	33916.9	42334.2	58770.2	80521.4	115371
530	8713.25	16226.6	34004.8	42083.1	58804.8	80477.3	115166
531	8651.67	16119.6	34030.6	42199.6	58721.1	80628.6	115310
532	8711.67	16191.5	33996.6	42282.9	58852.3	80589.3	115386
533	8715.68	16194.9	34058.5	42273.3	58927.3	80557.2	115564
534	8687.04	16230.2	34164.6	42180.1	58700.3	80515.3	115312
535	8683.15	16301.7	34030.4	42373.4	58832.5	80544.5	115334
536	8618.22	16176.7	34042.8	42272.3	58818.9	80692.1	115463
537	8615.09	16291.8	34122.9	42318.7	58937.2	80755.1	115666
538	8717.95	16206.6	34034.9	42369.1	58798.4	80861.6	115485
539	8735.03	16258.1	34139.2	42329.9	58910.9	80920	115399
540	8692.43	16235.4	34075.1	42258.2	58774	80788.3	115191
541	8647.77	16249	34104.1	42283.7	58912.8	80802.6	115212
542	8722.56	16230	33956.7	42332	59069.5	80946.5	115587
543	8760.09	16275.2	34294.7	42404	58917.7	80773.8	115597
544	8810.19	16191.8	34120.1	42284.3	58853.8	80979.3	115193
545	8780.24	16244.1	34185.4	42272.4	58911.8	80676.2	115537
546	8722.92	16250.9	34161.7	42391.8	59012.2	81159.9	115446
547	8782.05	16226.6	34219.9	42343.7	59105.4	81246.3	115519
548	8699.81	16246.5	34108.7	42332.7	59149.7	80986.5	115738
549	8719.56	16200.4	34241.5	42479.1	59100.5	81108.2	115540
550	8739.02	16184.8	34179.7	42265.1	59152.6	81237.9	115501
551	8685.82	16287.1	34167.5	42363.6	59020.5	81025.9	115292
552	8748.62	16288.1	34192	42511.3	58958.4	81024.1	115697
553	8763.97	16257	34223.5	42409.1	59105.7	81175.6	115498
554	8775.34	16247.8	34169.6	42388.8	59149.5	81207.2	115457
555	8733.06	16299.3	34334.2	42392.5	59096.2	81249.7	115822
556	8791.38	16299.9	34292.5	42413.8	59090.7	81179.8	115733
557	8745.25	16298.8	34201.6	42472.2	59172.6	81257.9	115387
558	8735.68	16332.8	34175.8	42489.8	59128.8	81407.2	115762
559	8740.91	16311.8	34177.3	42369.6	59087.1	81341.3	115228
560	8820.01	16279.2	34262.4	42517.3	59144.4	81411.7	115439
561	8826.16	16330	34298.9	42420.7	58977.5	81235.9	115725
562	8781.85	16296.7	34406.7	42411.1	59288.2	81282.7	115708
563	8807.66	16389.2	34306.7	42453.1	59372	81381.7	115466
564	8727.31	16307.2	34336.8	42349.6	59323.1	81466.3	115434
565	8755	16350.4	34378.5	42312.9	59134.4	81460.1	115534
566	8779.58	16391.3	34379.2	42527.2	59403.3	81420.7	115643
567	8778.21	16194.9	34284.5	42495.4	59361.7	81479.8	115541
568	8827.87	16348	34339.8	42595.7	59173.9	81514.7	115563
569	8745.04	16343.9	34321.9	42488.5	59503.5	81519.1	115607
570	8788.21	16354.2	34385.6	42548.9	59203.4	81673	115720
571	8852.9	16387.7	34278.5	42418.3	59253.3	81538	115525
572	8831.69	16371.9	34282	42516.4	59331.8	81712.3	115905
573	8779.52	16302.8	34398.9	42402.7	59225.4	81761.6	115611
574	8831.09	16369.6	34329.7	42619.8	59345.7	81659.3	115803
575	8752.42	16422.3	34311.3	42362.5	59329.7	81559.4	115609
576	8841.53	16445.4	34421.4	42457.8	59349.4	81786.8	115524
577	8769.67	16271.6	34364.3	42539.2	59378.6	81657.5	115683
578	8809.17	16425.2	34414.9	42507.3	59359	81703.7	115598
579	8792.67	16336.3	34492.9	42588	59457.7	81819	115471
580	8837.8	16300.8	34470.1	42684.9	59467.8	81822.9	115697
581	8859.92	16395.9	34395.9	42588.1	59603.9	81790.2	115446
582	8792.6	16411.2	34400.4	42573.7	59501.1	81716.5	115677
583	8780.13	16406.2	34419.7	42677.1	59491.6	81737.9	115554
584	8826.85	16319.6	34481.6	42622.8	59501.1	81644.2	115912
585	8829.45	16490.7	34428.2	42565.2	59305.9	81639.9	115769
586	8835.25	16402.9	34380	42622	59475.4	81967.6	115635
587	8806.01	16426.7	34396.9	42693.1	59690.4	81856.8	115739
588	8810	16472.9	34533.4	42524.8	59514.8	81969.5	115746
589	8807.4	16429.4	34452.4	42587.3	59550.4	81899.5	115865
590	8842.01	16483.7	34415.7	42651.4	59473.1	81904.2	115783
591	8831.68	16408.1	34387.1	42688.5	59616.6	81950.1	115494
592	8891.15	16382.6	34466.3	42757.9	59660	81945	115658
593	8876.97	16437.4	34537.4	42667.6	59512.5	82038.5	115645
594	8851.58	16409.1	34448.8	42575.9	59513.8	82088.2	115767
595	8819.38	16451.1	34407.7	42689.5	59718.5	82158.8	116073
596	8874.88	16374.5	34499.1	42667.7	59704.8	82107.9	115707
597	8860.85	16418.2	34491.4	42764.9	59784.1	82081.7	115762
598	8907.76	16417.1	34584.9	42655.9	59660	82039.8	115920
599	8823.03	16495	34547.9	42797.5	59688.3	82023	115677
600	8866.65	16547.9	34614.1	42772.3	59769.7	82195.1	115657

## Sheet: Sheet3
Daptomycin(uM)	Rate
0.468	5.77
0.937	23.86
1.875	110.5
3.75	166.54
7.5	219.39
15	289.82
30	407.63
