# Supplementary material for: Daptomycin forms a stable complex with phosphatidylglycerol for selective uptake to bacterial membrane
Source: eLife. 2025 Jun 2;13:RP93267. doi: 10.7554/eLife.93267 (PMC12129450; doi:10.7554/eLife.93267)
Supplement: Figure 2—figure supplement 1—source data 2. [file elife-93267-fig2-figsupp1-data2.xlsx]

## Sheet: Multi Scans KIN
Multi Scans KIN
Labels	8 CA KIN	7 CA KIN	6 CA KIN	5 CA KIN	4 CA KIN	3 CA KIN	2 CA KIN	1 CA KIN
Type	Kinetic Scan	Kinetic Scan	Kinetic Scan	Kinetic Scan	Kinetic Scan	Kinetic Scan	Kinetic Scan	Kinetic Scan
Comment
Start	0	0	0	0	0	0	0	0
Stop	600000000000	600000000000	600000000000	600000000000	600000000000	600000000000	600000000000	600000000000
Step	1000000000	1000000000	1000000000	1000000000	1000000000	1000000000	1000000000	1000000000
Fixed/Offset
XAxis	Time(ns)	Time(ns)	Time(ns)	Time(ns)	Time(ns)	Time(ns)	Time(ns)	Time(ns)
YAxis	Counts	Counts	Counts	Counts	Counts	Counts	Counts	Counts
0	22325.7	21880.1	20369.3	20279.5	24776.4	28923	32023.3	33503.4
1000000000	22378.2	22027.7	20488.6	20420.2	25168.6	29390.9	32448.5	33933.2
2000000000	22327.6	22166.3	20459.3	20528	25549.1	29814.2	32982.8	34531.5
3000000000	22426.5	22218.5	20590.8	20711.4	26020.9	30215.2	33563.6	35108.4
4000000000	22367.9	22397.7	20689.7	20804.8	26419.5	30674.6	33990.8	35459.9
5000000000	22411.2	22559.6	20834.9	21059.7	26856.2	31035.1	34435	35911.2
6000000000	22358	22548.6	20803.4	21217.2	27156.1	31410.8	34831.4	36388.7
7000000000	22383.4	22707	20918.5	21503.7	27643.2	31743.3	35239	36765.1
8000000000	22306	22786.3	21044.8	21510.9	28033.1	32221.2	35752.9	37240.6
9000000000	22269	22928.8	21219.1	21729.5	28335.1	32538.8	36191.2	37834.8
10000000000	22162.5	22948.9	21324.3	21925	28784.4	32798.5	36708.8	38148.4
11000000000	22249.1	23037	21311.8	22071.8	29097.1	33180	37185.7	38497.8
12000000000	22326.8	23053.2	21472.8	22227	29531.1	33463.2	37638.2	38821.8
13000000000	22169.2	23245.4	21568.2	22477.7	29795.1	33680.7	38244.4	39300.9
14000000000	22201.1	23373.4	21608.7	22688.2	30109.8	34125.4	38713.1	39705.8
15000000000	22234.3	23281.1	21741.7	22921.9	30363.3	34412.8	39138.1	40093.2
16000000000	22273	23480.9	21786.6	23021.8	30750.1	34521.4	39639.1	40755.8
17000000000	22257	23578.3	22012.1	23155.7	31283.3	34922.5	40318.9	41034.1
18000000000	22185.7	23653	22020.6	23364.4	31431.3	35285.1	40893.8	41514.3
19000000000	22169.7	23638	22055.6	23590.6	31774.9	35499.5	41380.2	42114.2
20000000000	22357.7	23794.3	22404.9	23718.1	32022.9	35778.8	42115.5	42503.8
21000000000	22216.4	23922.7	22360.7	23999.3	32415.5	36051.7	42494.2	43079.5
22000000000	22365.4	24026.8	22393	24147.9	32698.2	36454.8	43084.7	43563.4
23000000000	22313.3	23953.2	22541.3	24342.3	33012.9	36682	43803.4	44018.9
24000000000	22359	24140.2	22677.7	24589.9	33252.8	36915.2	44391.1	44602.6
25000000000	22230.9	24212.9	22717.9	24690	33528.9	37221.1	44898.4	45181.8
26000000000	22316.4	24277.3	22896.7	24940	33758	37352.7	45398.4	45681.7
27000000000	22278.5	24373.9	22898.5	25061.6	34107	37742.6	45975.3	46310.1
28000000000	22107.6	24379.9	23100	25286.2	34430.2	37991.7	46358.8	46988.1
29000000000	22152	24377.6	23175.7	25447.2	34615.2	38268.7	46800.1	47718
30000000000	22188.8	24580.2	23168.7	25693.2	34912.6	38429.7	47442.5	48428.1
31000000000	22038.7	24636.7	23377.3	25840	35080.5	38741.2	47699.1	49179.2
32000000000	22232.5	24712.9	23386.2	26024.8	35454.7	39088.5	48148.4	50026
33000000000	22132.8	24831.5	23521.5	26220.4	35670.2	39217.2	48597.2	50609.5
34000000000	22042.6	24900.7	23675.2	26410.1	35798.4	39549.9	49203.6	51520
35000000000	22156.9	24866.4	23789.8	26568.6	36059	39633.6	49473.4	52174.9
36000000000	22124.6	24937.8	23735.2	26785.1	36204.1	39957.7	50104.3	53140.7
37000000000	22097.6	25067.3	23940.1	26930.9	36423	40114.4	50340	53887.3
38000000000	22171	25088.3	23929.2	27161.6	36577.2	40426.6	50778.2	54487.8
39000000000	22201.6	25105.2	24127.3	27306.3	36853.4	40666.2	51192.8	55293.2
40000000000	22120.3	25164.6	24177.9	27464.3	36953.7	40952.6	51587.2	55979.8
41000000000	22172	25326.5	24303.7	27737.2	37148.4	41117.9	52069.8	56790.2
42000000000	22106.1	25313.8	24392.8	27915.1	37450.7	41455.6	52369.4	57302.7
43000000000	22117.5	25355.1	24545.2	28089.4	37564.4	41635	52784.7	57944.9
44000000000	22120.9	25493.2	24577.4	28125.2	37802	41824.1	53091.9	58483.3
45000000000	22111.3	25477.8	24678.7	28357.2	37844.3	42137.5	53430.6	59020.2
46000000000	22085.7	25612.5	24812.9	28494.7	38062.2	42367.7	53933.8	59626.7
47000000000	21953.6	25694.9	24997.6	28757.1	38151.8	42451	54204.8	60263.5
48000000000	22056	25689.6	24925.7	28764.1	38283.4	42637.7	54628.4	60695.7
49000000000	22089.7	25809.9	25217.6	28858.7	38423.8	42711.2	55021.2	61046.3
50000000000	22063.7	25728.5	25130.6	29094.6	38447.1	43150.8	55203.1	61525.4
51000000000	22010.6	25862.5	25330.3	29254.2	38702.7	43246.4	55632.9	62144.2
52000000000	22049.6	25986.9	25472.2	29459.4	38890.4	43541.8	55942.6	62420.8
53000000000	22015.6	26027.7	25527.4	29544.3	38923.6	43813.4	56257.6	62970.2
54000000000	21971.4	26141	25574	29624.8	39050.2	44039.8	56563.2	63284.4
55000000000	22046.8	26098.9	25712.2	29811	39180.6	44159.2	57001.2	63732.8
56000000000	22016.3	26075.1	25853.8	30051.8	39198.9	44378.3	57250.4	64198
57000000000	21896.8	26234.2	25965.2	30140.9	39257.6	44621	57559.9	64664.4
58000000000	21965.3	26170.4	25973.7	30225.9	39481.9	44740.4	58011.9	65257.1
59000000000	21882.4	26334.8	26078.9	30410.3	39430.8	44933.8	58269.2	65425.3
60000000000	22032.4	26445.1	26000.6	30623.9	39668.7	45076.5	58432.2	65774.4
61000000000	21834.6	26322.7	26424.9	30663.1	39634.1	45252.3	58572.5	66279.1
62000000000	21996.4	26534	26367.9	30912.7	39768.7	45530.2	59027.5	66509.8
63000000000	22003.6	26550.6	26574.7	30899.9	39983.6	45777.2	59189.1	66927.8
64000000000	22057.4	26642.9	26552.3	30991.6	40210.8	45997.6	59448.5	67244.9
65000000000	21987.7	26624.9	26679.2	31204.2	40184.2	46226.2	59844.9	67612
66000000000	21990.9	26756.3	26662.1	31347.9	40203.6	46457.5	59998.9	67906.5
67000000000	21924.4	26747.3	26758.1	31457	40378.3	46678.3	60372.5	68289.2
68000000000	22119.7	26871.7	26995.8	31547.6	40397.4	46851.5	60628.4	68745.7
69000000000	22024.3	26868.3	27022.5	31698.1	40371.5	47022.1	60876.1	68897.1
70000000000	22042.7	26783.1	27043.6	31854.2	40621.7	47208.2	61149.9	69407.2
71000000000	21915.6	26940.8	27304.9	31911.5	40517.3	47456.9	61331.2	69809.9
72000000000	21983.3	27021.7	27319.1	32175	40728.2	47660.3	61564.6	70049.3
73000000000	22030.3	27042.9	27401.4	32171.5	40958.3	47977	61813.7	70424.4
74000000000	21966.6	26993.6	27345	32205.5	41026.6	48068	62059	70675.9
75000000000	21904.5	27152.3	27565.6	32515.4	41103.7	48289.8	62177.9	70992.1
76000000000	22087.9	27107	27690.4	32585.4	40980.8	48407.5	62725.1	71521.2
77000000000	21974.6	27253.4	27687.9	32584.7	41295.8	48652.5	63018	71852.5
78000000000	21879.4	27187.2	27862	32689.8	41178.6	48884.5	63330.4	71943.9
79000000000	21941	27230.4	27916.9	32798.6	41402.8	49067.4	63560.6	72517.7
80000000000	22003.7	27425.6	27972.5	32941.9	41319.9	49357.7	63832.8	72602
81000000000	21998	27383.9	28101.3	33161.2	41427.7	49498.1	63998.9	72915.1
82000000000	21985.1	27391.3	28172.1	33214	41675.3	49693.8	63992.2	73413
83000000000	22018.1	27486.5	28167.4	33328.8	41594.5	49948.2	64442.2	73602.7
84000000000	22040.4	27583.1	28380.4	33316.4	41749.3	50107.7	64708.1	74039.1
85000000000	22004.4	27560.1	28413.5	33364.6	41859.1	50322.9	64979.8	74186.2
86000000000	21964.8	27641	28475.8	33580.2	41804.6	50409.2	65296.6	74751.3
87000000000	21932.8	27751.9	28392.7	33607.9	42088.7	50635.4	65343.3	75147.8
88000000000	21999.3	27748.7	28606	33701.3	42196	50736.1	65681.1	75315
89000000000	21982.6	27735.4	28650.5	33740.8	42200.6	51134.4	65890.1	75809.3
90000000000	21902.6	27780	28824.8	33871.5	42309.9	51144.6	66166.1	76016.3
91000000000	21926.7	27857.1	28882.5	33953	42337.6	51311.7	66330	76316.8
92000000000	21995.3	27796.7	28849.1	34069.1	42500.5	51475.8	66568.2	76559.8
93000000000	22019.6	28018.8	29009	34239.9	42511.6	51517	66832.5	77001.4
94000000000	22001.7	28015.4	29152	34230.8	42512.8	51733.6	66877.3	77435.4
95000000000	21976.5	28015.7	29218.9	34408.4	42614.4	51878.4	67148.2	77622.4
96000000000	21955.2	28109.2	29268.7	34424.6	42862.5	52140	67388.1	77756.6
97000000000	21987.5	28234.5	29291.4	34404.8	42760.8	52156.9	67610.3	78441.2
98000000000	21869.5	28220.2	29419.2	34475.4	43032.7	52393.9	67793.6	78329.7
99000000000	21912.2	28166.3	29492.5	34655.3	43080.1	52626.1	67968.8	78645.9
100000000000	21934.7	28253.4	29452.6	34620.6	43024	52807.2	68252.2	78862
101000000000	21977.8	28332.9	29621.9	34681.9	43188.1	52957.2	68178.4	79240.9
102000000000	21960.3	28301.8	29591.6	34767.2	43285.7	53245.7	68537.6	79614.5
103000000000	21979.7	28396.4	29793.7	34783.5	43460	53109.2	68655.2	79639.7
104000000000	21934.3	28468.2	29718.6	34927.3	43432	53269.8	68654.6	80204.3
105000000000	21891.4	28431.5	29898.5	35012.2	43484.8	53528.1	69122.4	80181.1
106000000000	21990.4	28581.7	29997.1	34946.6	43666.1	53579.5	69333.9	80374.5
107000000000	21977.1	28578.7	30023	35070.3	43718.9	53865.3	69280.2	80816.9
108000000000	22031	28487.7	30050	35166.5	43716.8	53926.5	69733.8	80995.5
109000000000	21932.2	28676.9	30079.7	35193.3	43836.3	54082.6	69927.6	81113.9
110000000000	21940.7	28707.9	30254.3	35230.1	43886.9	54371.1	70042.8	81401.9
111000000000	21935.6	28732.7	30319.8	35416.2	44093.2	54461.9	70263.5	81861.7
112000000000	21917.1	28774.8	30320.2	35408.8	44047.9	54636	70179.4	82010
113000000000	21971.2	28798.8	30420	35522.7	44058.4	54909.5	70461.5	82121.6
114000000000	21992.3	28893.2	30396.7	35610.8	44284.2	54881.8	70767.7	82382.3
115000000000	21971	28908.7	30613.4	35544.2	44425.7	55039.9	70733.5	82626.2
116000000000	21872.8	29029.5	30523.1	35557.9	44390.4	55093.4	70958.6	82596.3
117000000000	22042.7	28936.9	30737.3	35621.2	44437.9	55267	71261.2	83262.6
118000000000	21972.7	28947.1	30639.7	35764.6	44626.9	55350.9	71557	83170.3
119000000000	21939.9	29046.8	30888.2	35751.8	44661.1	55455.9	71486.2	83512.8
120000000000	22057.9	29144	30872.4	35861.1	44958.3	55720.9	71848.7	83746.9
121000000000	21975.3	29068	30985	35862.5	44883.4	55860.1	71841.2	83737.6
122000000000	21958.1	29193.5	30939.7	35825.4	45087.4	56047.6	72043.5	84029.2
123000000000	22027.3	29206.5	31051.5	35961.8	45186.1	56067.9	72245.4	84393.7
124000000000	21892.1	29270.2	31146.7	35946.8	45176.2	56241.1	72308.6	84514
125000000000	22023.4	29286.5	31206.6	36029.6	45142.5	56331.5	72444.4	84749
126000000000	21933.3	29333.3	31127.5	36044.7	45286.1	56348	72790.6	84692.9
127000000000	22013.6	29352.4	31262.7	36146.5	45497	56600.7	72878.4	84999.6
128000000000	21955.7	29414.2	31352.4	36119.9	45458.7	56629	72994.1	85406.2
129000000000	21924.1	29395.3	31399.4	36221.6	45568	56844.1	72847.1	85761.6
130000000000	22024.1	29483.8	31522.6	36199.5	45743.8	57099	73159.7	85806.6
131000000000	22024.9	29498.1	31579	36276.7	45772	57082.6	73514.5	85966.9
132000000000	22010.6	29505.9	31533.1	36261.1	45825.1	57117.3	73773	86235
133000000000	22040.4	29554.9	31622.5	36373.3	46008.1	57291.2	73925.8	86435.8
134000000000	21979.9	29725.6	31652.9	36382.2	46044.6	57554	74151.1	86821.3
135000000000	21963.9	29678	31735.3	36447.3	46123.2	57662.1	74078.2	86851.2
136000000000	22091.6	29742.8	31716.7	36434.3	46214.6	57618.7	74399.7	87057
137000000000	22027.9	29665.5	31965.6	36412.9	46273.7	57717.4	74349.4	87333.3
138000000000	21965.6	29694	31990.3	36594	46376.1	57808.9	74519.6	87490.3
139000000000	21971.7	29805.6	31960.1	36468.6	46521.9	58010.6	74864.4	87873
140000000000	21967.8	29877.5	32108.6	36656.9	46398.9	58187.1	74797.5	87937.3
141000000000	21974.3	29822.6	32033.7	36763.6	46687.1	58186.9	75195.4	87855.1
142000000000	22026.5	29895.7	31976.4	36620.5	46721.9	58231.3	75366.7	88248.9
143000000000	21994.9	29936.4	32072.3	36658.5	46839	58533	75487.1	88605.4
144000000000	21865.2	29951.2	32151	36850.3	46853.5	58664.6	75538.6	88608.6
145000000000	21943.3	30012.6	32281	36788	46895.1	58609.9	75717.7	88827.1
146000000000	22047.3	30069.2	32276.6	36770.5	46859.1	58757.3	76133.2	88981.8
147000000000	21906.6	30065.4	32332.4	36724.5	47022.2	58951.9	76152.5	89239.6
148000000000	21970.9	29967.4	32413.8	36796.7	47188.2	59119.7	76150.9	89630.2
149000000000	21930.1	30291.9	32412.7	37054	47202.6	59111.2	76286.6	89610.4
150000000000	21959	30096.8	32444.3	36973.4	47410.1	59423.8	76447.8	89827.3
151000000000	22048.7	30272.6	32644.5	36997.1	47548.9	59403.1	76618.2	89858.6
152000000000	21906.9	30177.5	32501.7	36965.7	47695.4	59441.5	76850.7	90125.9
153000000000	21903.5	30147.8	32712.8	37030.4	47656.2	59582.9	76918.1	90236.3
154000000000	21889	30270.6	32718.4	37094.3	47683.8	59620.1	77050.2	90487.9
155000000000	21956	30241.1	32756.3	37066.6	47723.5	59852.9	77296.7	90599.9
156000000000	21949.3	30312.5	32724	37120.3	47956.2	59935.5	77161.2	90793.1
157000000000	21966.5	30420.7	32837	37048.5	48027.1	60033.3	77637.4	91144.1
158000000000	21899	30410.6	32894.1	37154.2	48139.5	59984.6	77587.8	91076.7
159000000000	21992.3	30382.2	32953.2	37305.7	48263.9	59979.8	77693.8	91288.3
160000000000	21977	30406.1	33001.5	37210.2	48311.3	60157.1	77970.7	91455.2
161000000000	21997.8	30512.7	33045	37307	48396.6	60403.5	78049.1	91600.5
162000000000	21961.9	30551.3	33129.7	37219	48444.2	60491.7	78138.2	91778.1
163000000000	22104.3	30607.6	33066.9	37218.1	48541.9	60436.3	78220.9	92131.6
164000000000	22000.4	30581.2	33075.3	37414.8	48612.8	60673.8	78332.9	92122.9
165000000000	21949.2	30656.3	33242.9	37416.2	48624	60658.6	78695.1	92180.3
166000000000	22062	30778.5	33274.7	37371.6	48626.9	60908.6	78686.2	92385.8
167000000000	21987.2	30681.5	33270.3	37465.3	48772	60933.2	78697.1	92612.8
168000000000	21930.1	30673	33321.6	37492.9	48844.6	60895.9	78890.3	92817.5
169000000000	21990.5	30765.5	33476.4	37471.2	48970.4	61184.8	79010.6	92798.9
170000000000	21933.5	30799.6	33430.2	37523	49046.9	61123.5	79105.5	92971.9
171000000000	22002.5	30660.5	33436	37410.5	49173	61220.5	79266	93041.2
172000000000	21930.8	30899.2	33529	37574.7	49380.7	61263.3	79288.4	93138.6
173000000000	21979	30816.6	33586.4	37535.9	49352	61563.4	79362.8	93386.5
174000000000	22009.7	30904.7	33540	37475.9	49486.2	61621.9	79649.3	93541.4
175000000000	22009.8	30973.9	33568.4	37615.3	49449.8	61627.8	79665.3	93611.4
176000000000	22005.5	30846.3	33787.1	37676.6	49581.1	61895.4	79750.9	93569.8
177000000000	21913.3	30953.5	33753.8	37613.5	49684.9	61801.1	80076.8	93514.6
178000000000	21973.4	31019.3	33725.4	37530.7	49833.8	61840.8	80000.3	93749
179000000000	21930.3	31051	33850.7	37632.4	49749.8	62101.8	80075.9	93846.8
180000000000	21920	31000.6	33770.4	37617.2	49827.3	62002.8	80407.9	93816.3
181000000000	21919.5	31122.6	33824.6	37728.4	49925.3	62194.5	80550.3	94099.8
182000000000	21978.2	31117.5	33938	37725.3	49986.3	62236.5	80666.1	94185
183000000000	22006.9	31113.1	33958.9	37669.1	50010.3	62459.3	80705.1	94328.9
184000000000	21963.2	31081.1	33943	37844.6	50286.7	62471.4	80796.9	94394
185000000000	22026.4	31148.2	33928.8	37771	50222.6	62450.6	80909.8	94729.1
186000000000	21963.9	31217.9	34039.6	37672	50441.3	62525.3	81034	94797.8
187000000000	21972.7	31212.9	34126.2	37802.7	50337	62586.1	81297.2	94629.8
188000000000	22001.7	31202.1	34144.4	37888.1	50412.9	62921.3	81135.2	94658.7
189000000000	22049.6	31264.7	34112.4	37857.3	50547.2	62734.9	81346.1	94986.7
190000000000	22027.5	31246.1	34266.6	37935.1	50766.1	62989.2	81551.5	95059.5
191000000000	21955.7	31427.2	34216.2	37872.8	50757	63094.8	81504.5	95202.6
192000000000	22017.5	31332.2	34278.1	37897.9	50761.5	63072.4	81595	95115.5
193000000000	21950.3	31330.6	34445.4	37937.6	50793.3	63187.1	81831.9	95452.1
194000000000	21965.1	31311.6	34392.3	37860.1	51119.5	63226.7	81934.9	95376.1
195000000000	21979.2	31421.3	34352	37974.3	51153.9	63206.9	81965	95584.6
196000000000	21963.4	31462.4	34374.9	38121.8	51183.9	63409.8	82166.8	95560.3
197000000000	21966.4	31450.2	34349.3	38125.9	51291.9	63433.9	82174.4	95472.5
198000000000	22002.2	31427.1	34405.7	37950.8	51305.1	63494.1	82397	95764.6
199000000000	21991.3	31551.5	34563.7	38057.4	51305.1	63619.7	82211.7	95881.4
200000000000	21915.3	31477.1	34584	38035.2	51409	63664.6	82645	95958.2
201000000000	21983.6	31592.6	34530.2	38080.6	51547	63795.2	82790.4	96037.4
202000000000	22007.2	31567.5	34665.6	38016.1	51622	64014.7	82769.5	95953.4
203000000000	21909.8	31476.8	34635	38054.6	51598.2	63937.2	82836.7	96159.8
204000000000	21956.4	31586.3	34751.4	38148.6	51655.6	64111.3	82885.7	96093.7
205000000000	21953.2	31604	34746.6	38219.3	51697.4	64235.9	83070.3	96324.9
206000000000	21984	31606.6	34760.9	38256	51888.3	64150.5	83173.6	96261.1
207000000000	21993.2	31719	34680.2	38177.9	51894.1	64272.6	83289.4	96206.2
208000000000	21998.4	31600.5	34810.7	38187.3	52111.6	64471.2	83332.2	96327.7
209000000000	21887.3	31781.3	34750.8	38170.8	51944.1	64613.1	83367	96558.6
210000000000	22013.7	31655.4	34878	38288.1	52152.3	64510.4	83704.6	96713.3
211000000000	21917.2	31782.8	34834	38179.3	52118.1	64623.8	83748.6	96529.8
212000000000	21961.9	31710.4	34893.6	38285.4	52407.7	64724.7	83737.8	96793
213000000000	21954.6	31717.4	35003.5	38375.4	52413.7	64890.1	83854.7	96840.9
214000000000	22032.9	31799.7	34995.7	38389.9	52437.4	64877.9	83889.1	96769.1
215000000000	22003.4	31789.1	34953.4	38246.3	52309	65066.5	83946.3	97011.8
216000000000	22036.4	31883.3	34972.6	38363	52481.5	65163.8	84122	96923.7
217000000000	21898.6	31903.9	35097.3	38298.6	52660.6	65076.6	84276.8	96968.8
218000000000	21880.3	31982.9	34940.2	38180.2	52802	65315	84444.8	97127.3
219000000000	21967.4	31757.2	35194.3	38384.5	52733.8	65416.5	84409.1	97194.7
220000000000	21895.2	31879.8	35150.7	38266	52858.2	65338.4	84492.8	97262.2
221000000000	21996.4	31946.8	35111.2	38395.4	52941.4	65386.6	84668.4	97287.7
222000000000	22069.1	31894.6	35245.7	38305	52949.8	65504.4	84716	97299.6
223000000000	21948.2	31994.7	35270.2	38326.8	53096.4	65792.9	84731.7	97398.9
224000000000	22000.9	31927.1	35312.3	38383.7	53192.1	65800.2	84936.2	97539.4
225000000000	21933.8	32103.5	35308.4	38316.7	53256.8	65734.3	84726.9	97636.6
226000000000	21976.2	31928.6	35309	38404	53126.6	65964	85031.3	97537.1
227000000000	21982.5	32048	35399.6	38548.7	53371.2	65984.9	85019.3	97978.9
228000000000	21934.1	32031.7	35472.9	38541.9	53504.4	66066.8	85153.3	97920.6
229000000000	21950.3	32055.1	35379.6	38523.3	53430.7	66185	85080.9	97806.9
230000000000	21996.5	32024.4	35506.5	38582.9	53505.3	66091.4	85077.2	97815.2
231000000000	21982.7	32015.2	35409.5	38639.4	53577.9	66255.5	85360.7	97905.6
232000000000	21965	32165.2	35390.4	38631.7	53614.1	66326.3	85274.6	97986.4
233000000000	21982.9	32049.7	35292.4	38518	53651	66529.4	85350.5	97885.8
234000000000	21929.4	32110.9	35609.7	38588.2	53823.1	66557.5	85425.5	98037.3
235000000000	21896.3	32102	35516.2	38631.7	53836.1	66483.7	85535.4	98117.2
236000000000	21904.9	32126	35511.2	38658.1	53899.1	66746.4	85781.5	98326
237000000000	21972.3	32157.6	35761.1	38635.9	53980.2	66676	85684.9	98477.7
238000000000	22015.3	32178.2	35687.5	38703.4	54073.9	66867.4	85968.8	98484.6
239000000000	21919.7	32186.8	35667.5	38654.7	54180.1	66863.8	86022.4	98633.2
240000000000	21961.8	32227.3	35662.3	38757.3	54257.4	66991.6	86041.9	98505
241000000000	21996.7	32194.8	35755.3	38712.6	54226.1	67138	86154.9	98606.2
242000000000	22011	32205.4	35820	38747.9	54507.8	67158.3	86168.1	98738
243000000000	21988.6	32386.2	35721.1	38633	54402.6	66993.2	86101.7	98743.3
244000000000	21853.1	32295.3	35751.8	38770.9	54358	67160.6	86327.6	98887.8
245000000000	21951.9	32237.3	35718.8	38845.6	54530.8	67220.1	86543.9	98874.6
246000000000	21893.7	32321.3	35733.3	38792.1	54576.8	67441.1	86431.6	99084.1
247000000000	22103.2	32319	35884.6	38898.3	54740.6	67498.8	86248.8	99298.9
248000000000	21942.5	32392.7	35930.4	38891.1	54734.2	67570.4	86558.6	98992.1
249000000000	22032.8	32305.6	35807.1	38837.8	54710.9	67763.8	86587.2	99253.4
250000000000	21946.5	32420.2	36000.8	38923.5	54660.9	67650.1	86575.9	99193.6
251000000000	21964.9	32294.9	35972.9	38819.6	54854.1	67793.4	86610.6	99584.4
252000000000	21939.7	32539.5	36023.9	38860	54923.2	67764.4	86946.7	99361.4
253000000000	21966.8	32366	35959.6	38939.5	54971.3	67792.6	86940.6	99542.3
254000000000	22009.2	32344.4	36079.6	38904.5	55036.8	67957.6	86941.9	99688.8
255000000000	22007.8	32409.4	35991.1	38887	55061.6	67920	86886	99544.3
256000000000	21961.2	32409.3	35966.2	38979.6	55112.5	68003.9	86899.2	99669
257000000000	21953.6	32557.1	36100.2	38951.8	55126.5	68107	86963.8	99729.7
258000000000	21952.9	32428.1	36145.8	38874	55266.5	68212.7	86930.1	99850.1
259000000000	21970	32532.9	36034.4	38975.2	55378.6	68258.7	87088	99933.6
260000000000	21924.1	32567.9	36227	38976.6	55500.3	68415.1	87276.2	99913.6
261000000000	22001.5	32437.9	36121.9	39113.8	55380.8	68404.1	87293.4	100005
262000000000	21902.5	32570.6	36200.5	38996.9	55619.2	68363.5	87331.3	99965.4
263000000000	22001.3	32557.6	36174.2	39023.7	55643.6	68573.4	87237.1	100109
264000000000	22012.8	32552.6	36278.6	38988.1	55667.2	68370.2	87481.2	100102
265000000000	22067.3	32539.1	36231.5	39033.7	55552.2	68756.4	87579.8	100187
266000000000	22013.1	32414.7	36379	39033.7	55645.5	68604.3	87566.9	100356
267000000000	21991.3	32703.9	36205.8	39203.7	55766.2	68738.5	87542.6	100460
268000000000	21938.5	32625.2	36323.7	39125.6	55796.1	68841.7	87654.1	100574
269000000000	21975.9	32546.9	36280.8	39069.7	55915.6	68892.9	87737.9	100540
270000000000	22028.3	32508.9	36332.1	39177.5	55880.6	68973.7	87978.4	100442
271000000000	22017.6	32603.3	36405.4	39176.1	55963.4	69066.2	87798.3	100443
272000000000	21927.8	32659.8	36434.6	39160.8	56071.2	68942.2	87862.9	100556
273000000000	21994.4	32746.3	36332.5	39038.6	56107.4	69166.3	88079.6	100666
274000000000	21978.3	32651.9	36406.4	39299.3	56023	69319.4	87886.7	100722
275000000000	21968.8	32864.2	36479.9	39184.8	56068.9	69305.8	88084.2	100719
276000000000	21971.9	32586	36390.7	39117.7	56276.6	69238.7	88198.4	100844
277000000000	21931.9	32760	36476.8	39279.5	56374.6	69507	88345.1	100924
278000000000	21903.7	32838.2	36467.1	39310.3	56271.1	69449.8	88322.8	100997
279000000000	21934.1	32639	36474.5	39320.3	56347.5	69556.2	88351.8	100986
280000000000	21920.3	32778.5	36548.8	39324.9	56517.4	69586.7	88334.4	101071
281000000000	21994.5	32787	36676.2	39297.4	56407.3	69563.2	88543.9	101030
282000000000	21879.2	32801.2	36595.1	39269.8	56410.3	69688.9	88549.9	101076
283000000000	21896.2	32848.1	36549	39261.5	56567.9	69738.9	88604	101352
284000000000	22009.3	32692.8	36605.1	39330.2	56678.1	69692.6	88511.5	101414
285000000000	22027.2	32704.9	36618.2	39357.4	56743.7	69727.3	88650.8	101342
286000000000	21952.7	32823.5	36570.8	39373.1	56758.2	69975.6	88810.1	101443
287000000000	22028.3	32733.8	36604.9	39471.2	56780.9	70005.5	89010.8	101283
288000000000	21882.2	32740.7	36629.4	39447.5	56792.2	69851.6	88977.3	101476
289000000000	21892.9	32865.5	36698.6	39504.2	56880.9	70051.3	88798.5	101330
290000000000	21999.6	32852.3	36657.6	39424.9	56898.2	69953.8	88882.7	101487
291000000000	21949.4	32851.9	36737.9	39424.6	57069.4	70120	88911.9	101576
292000000000	21932.4	32791.8	36783.5	39569	56952.1	70389.4	89135.4	101689
293000000000	21968.9	32831.3	36851.4	39581.1	57031	70315.9	89130.1	101747
294000000000	21970.5	32878.4	36858	39628.5	57143.2	70199.5	89406.5	101839
295000000000	21941.1	32875.6	36771.7	39525.6	57302.4	70373.9	89301.3	101926
296000000000	21857.4	32987.9	36894.4	39531.5	57231.4	70454.7	89313.8	101689
297000000000	22016.8	32889.5	36769.1	39634.8	57333.4	70673.1	89461.7	101959
298000000000	21913.4	32810.6	36823.4	39584.5	57304.8	70632.6	89478.8	101998
299000000000	21985.2	32923.3	36882.3	39614.4	57470.8	70609.7	89485.1	101930
300000000000	21969.2	32892.4	36858.6	39598.4	57359.3	70579.7	89481.1	101924
301000000000	21957.9	32925.1	36838	39719.4	57433.6	70538	89484.6	101864
302000000000	21908.4	32965.2	37052.2	39635.6	57415.6	70722.3	89689	101802
303000000000	21944.3	33038.2	37026.7	39630.8	57543.8	70675.3	89719.1	102131
304000000000	21957.4	33086.9	36919.1	39603	57564.5	70910.9	89743.9	102084
305000000000	21928.2	32874.2	36997	39621.6	57644.2	70845.7	89700.7	102136
306000000000	21977.9	32857.2	37063.9	39750.1	57678.1	70924.9	89954.5	102004
307000000000	21967.6	32984.5	36970.6	39602.8	57834.8	71017.5	89875	102190
308000000000	21896.1	33046.1	37071.7	39771.5	57766.4	71081.5	89900.7	102182
309000000000	22010.2	33060.4	37138.1	39677.9	57709.7	71211.7	90140.8	102444
310000000000	21919.9	32999.5	37166.5	39809.9	57784.8	71145.6	90243.6	102182
311000000000	22003.4	32920.9	37014.6	39731.4	57886.6	71234.5	90038.5	102259
312000000000	21862.6	33037.4	37188.2	39814	57786	71235	89841.6	102423
313000000000	22034.1	32975	37178.7	39824.8	58009.5	71366.6	90286.8	102248
314000000000	21858	33048	37082.2	39925.7	58013.9	71614.5	90018.6	102614
315000000000	22008.5	33137	37044.4	39856.7	58018.4	71445	90307.9	102495
316000000000	21889.2	33125.4	37092.4	39796.4	58158.2	71759.7	90065.1	102752
317000000000	21891.7	33106.2	36999.4	39864.9	58059.9	71780.5	90292.5	102795
318000000000	21935.7	33191.5	37175.4	39881.6	58072.8	71739.9	90118.9	102545
319000000000	21914	33096.8	37075.5	39859.9	58237.8	71644.3	90312.1	102848
320000000000	21922.5	33033	37061.9	39858.1	58531	71681.9	90409.5	102908
321000000000	21944.6	33124.4	37144.4	39900.6	58185.3	71599.5	90500.2	102606
322000000000	21872.3	33055	37151.6	40049.6	58463.1	71761.7	90665.2	102613
323000000000	21950.7	33114.3	37189	39964.9	58368.7	71831.4	90554.1	102926
324000000000	21900.5	32994	37192.7	39932.1	58508.3	71826.7	90629.5	103030
325000000000	21990.4	33135	37109.9	39930.8	58605	72002.9	90595.9	103025
326000000000	21913.3	33195.3	37210.7	39862.4	58520.2	72021	90725.6	103097
327000000000	21909.4	33131.2	37177.7	40066.1	58652.1	72153.2	90708.6	103043
328000000000	21918.1	33113.8	37339.5	40136.2	58700	72140.4	90949	103060
329000000000	21900.9	33240.9	37256.4	40079.6	58728.2	72061.4	90879.5	103195
330000000000	22014.5	33257.6	37223.8	40079.4	58692.4	72170.7	90787.5	103100
331000000000	21993.9	33043.6	37296.3	40112.8	58834	72407.2	90933.2	103195
332000000000	21941	33204.9	37234.1	40082.6	58795.6	72383.5	91014.2	103348
333000000000	21926.3	33201.9	37408.3	40156.7	58873.2	72434.8	91086.1	103285
334000000000	22047.3	33159.4	37333.1	40019.3	58878.3	72367.3	91175.9	103465
335000000000	21920.4	33164.2	37384.6	40009.9	59049.2	72428.6	91042.4	103517
336000000000	22013.9	33196.6	37330.3	40186.4	58952	72621	91160.5	103386
337000000000	21961.8	33324.5	37477.4	40271.9	58877.4	72552.5	91140.7	103604
338000000000	22014.1	33291.4	37380.9	40162.8	59033.9	72680.8	91245.2	103807
339000000000	21990.9	33286.2	37360.1	40266	58959.8	72606.6	91147	103664
340000000000	21949.7	33298.6	37303.4	40240.2	59123.3	72909.1	91447.7	103599
341000000000	21903.3	33208	37403.4	40262.3	59204.7	72836.8	91230	103635
342000000000	21887.8	33271.6	37351.9	40255	59195.1	72963.2	91270.2	103640
343000000000	22026.8	33319.6	37356.7	40289.5	59312.1	72806.4	91449.5	103747
344000000000	21928.6	33326.9	37458	40373.5	59512.5	72954.4	91429.3	103670
345000000000	21851.3	33312.1	37503.5	40412.2	59308.3	73052.9	91552.4	103832
346000000000	21905.9	33257	37502.9	40142.7	59479.9	73032	91517.5	103894
347000000000	21937.7	33278.1	37506.7	40349.1	59444.2	73134.2	91631.9	103713
348000000000	21990	33220.4	37407.2	40339.3	59537	73217.8	91590.6	103861
349000000000	21887.4	33384	37397.6	40327.8	59519.8	73236.9	91659.9	103713
350000000000	21915.7	33328.3	37546.1	40451	59587.9	73253.2	91645.9	103813
351000000000	21884.2	33258.4	37491.3	40418.9	59450.7	73265.6	91639.9	104032
352000000000	21983.8	33363.2	37456.1	40344.4	59581.4	73257.6	91753.4	103794
353000000000	21934.2	33362.1	37527.4	40379.5	59564.4	73382.6	91657.1	103911
354000000000	21972.6	33359.2	37535.8	40481.1	59670.1	73473.2	91886.6	104259
355000000000	22007.1	33279.1	37579.3	40456.9	59687.8	73482.8	91781.7	104108
356000000000	22002.8	33361.2	37630.2	40566.5	59860.4	73745.1	91783.1	104121
357000000000	21982.6	33370.6	37578.8	40447.4	59779.2	73623.3	91909.2	104191
358000000000	21905.5	33338.1	37476.7	40411	59967.7	73558.4	91874	104419
359000000000	21928.9	33415.7	37540.7	40464.8	59961.8	73609.7	92080.9	104433
360000000000	21989.4	33322.8	37610.1	40663.2	59885.3	73777.1	91965.8	104181
361000000000	21948.2	33422.4	37573.9	40631	59996.9	73876.3	92068.5	104241
362000000000	21928.1	33532.6	37734.8	40552.1	59944.5	73813.7	92114.5	104509
363000000000	21992.9	33408.5	37667.8	40631.7	59915.8	73768.3	92183.9	104299
364000000000	21889.1	33507.4	37562.9	40767.6	60006.1	73889.4	91915.1	104467
365000000000	21871.9	33508.8	37591.5	40693.5	60192	74049.9	92019.4	104527
366000000000	21838.8	33508	37627.6	40761.9	60225.3	74127.1	92196.5	104483
367000000000	22053.8	33369.8	37718.5	40640.9	60273.5	74062.1	92120.7	104699
368000000000	21936.1	33411.4	37581.2	40836.8	60234.8	74334.8	92351.4	104543
369000000000	21903.3	33456.9	37731.5	40745.7	60301.2	74155.6	92182.8	104345
370000000000	21829	33416.4	37617.3	40707.3	60364.3	74225.3	92473.2	104594
371000000000	21946.1	33464.9	37611.9	40795.2	60412.2	74185.3	92253.2	104653
372000000000	21996.9	33602.7	37751.1	40858.9	60224.1	74249.7	92286.9	104730
373000000000	21971.4	33541.6	37640.9	40814.4	60508.5	74301.2	92374.3	104624
374000000000	21886.6	33471.5	37629.8	40765	60280.1	74335.7	92483.3	104772
375000000000	21863.8	33450.5	37653.7	40832.6	60441.7	74505.9	92449.9	104598
376000000000	21985.1	33435	37740.5	40859.3	60585.3	74341.9	92498	104848
377000000000	21992.9	33530.7	37779.4	40944.4	60521.2	74548.6	92701.3	104694
378000000000	22015.6	33603.4	37801.4	40900.4	60474	74609.3	92559.2	104627
379000000000	22010.2	33472.2	37798.7	40810.8	60509.1	74644.9	92801.2	104835
380000000000	21925.4	33559.6	37830.7	40942.4	60684.3	74758.1	92586	104914
381000000000	21896.7	33545.6	37793.8	40947.9	60619.3	74769.8	92656.1	104757
382000000000	21940.2	33556.8	37709.1	41091.3	60746.1	74861.9	92672.6	104703
383000000000	21972.6	33408.9	37765.5	40878.7	60838.8	74789.3	92574.3	104862
384000000000	21892.5	33547.3	37915.2	40920	60787.2	74796.7	92755.6	104979
385000000000	21966.3	33599.5	37856	41029.9	60807.2	74914.8	92620.2	104923
386000000000	21874.2	33617	37730.5	41137.9	60923.7	75124.8	92927.1	104966
387000000000	21897	33646.6	37858.6	41141.9	61008.4	74954.9	92656.8	104949
388000000000	21946.7	33613.9	37731	41137	60997.3	75085.2	92698.5	104848
389000000000	21849.7	33536.3	37901.8	41093.6	61138.8	75154.8	92813	104650
390000000000	21869.5	33688.9	37933.9	41175.6	61012.4	75246.2	93013.1	104869
391000000000	21917.6	33602.3	37780.5	41020.3	61015.9	75223.1	93015.4	104932
392000000000	21837.6	33549.6	37894.8	41055.6	61237.8	75171.7	93018.9	104989
393000000000	21847.7	33579.9	37887.9	41233.2	61254.2	75123.5	93049.4	105085
394000000000	21852.2	33658.1	37853.9	41220.9	61155.9	75205.1	93049	105111
395000000000	21930.3	33605	37917.4	41284	61342.5	75452.7	93328.9	105084
396000000000	21906.8	33641.3	37824.6	41158.4	61206.4	75476.6	93023.6	104882
397000000000	21923.7	33548.5	37863.4	41307.4	61261.4	75320.4	93109.5	105163
398000000000	21954	33744.3	38020.7	41201.1	61215.5	75284.7	93213.5	105122
399000000000	21991.1	33653.4	37784.2	41398.5	61454.1	75387.1	93250.5	104973
400000000000	21925.5	33727.8	37980.5	41341.2	61336	75592.1	93107	105055
401000000000	21912.8	33701.3	37877.4	41252.7	61382	75572.4	93240.5	105138
402000000000	21917.4	33604.6	37856.5	41273.2	61418.2	75494.6	93188.6	105243
403000000000	21827.2	33705.9	37909.8	41332.9	61658.5	75661.7	93096.8	105217
404000000000	21916	33746.1	37944.6	41458.8	61491.7	75702.8	93251.5	105330
405000000000	21933.8	33722.5	37778.4	41392.2	61520.7	75795.2	93279.2	105300
406000000000	21898	33642.8	37998.7	41401.1	61530.4	75688.5	93443.4	105211
407000000000	21949.1	33738.6	38001.2	41418	61616.7	76006.3	93385	105191
408000000000	21928.8	33643.3	37976.1	41344.2	61622.7	75895.9	93354.9	105262
409000000000	21918.6	33724.4	37906.9	41506.1	61764	76048.8	93628.9	105205
410000000000	22004.2	33681.8	38021.7	41464.2	61666.5	76048.1	93443.6	105334
411000000000	21953.8	33658.8	38103.8	41401	61743.1	76128.6	93403.5	105350
412000000000	21900.3	33744.3	38039.4	41543.6	61834.7	75994.4	93579.8	105294
413000000000	21867.5	33691.1	37965.4	41506.7	61742.2	76066.6	93444.5	105310
414000000000	21852.5	33733.8	38008.3	41537.8	61950.9	76113.6	93687.4	105323
415000000000	21893.3	33829.7	37935.1	41641.7	61943.9	76118.1	93449.4	105339
416000000000	21930.9	33767.6	38032.1	41485.8	61949.3	76129.8	93479.9	105472
417000000000	21845.6	33772.2	37967.3	41605.8	62041.3	76177.5	93744	105339
418000000000	21966	33798.2	38075.9	41731.1	62081.2	76293.7	93536.5	105525
419000000000	21835	33930.7	37886.9	41572	62000.9	76126.9	93691.4	105382
420000000000	21917.1	33784.8	38032.7	41640.4	62129.9	76211.7	93868.8	105409
421000000000	21908.8	33819.8	38107.6	41664.1	61990.7	76110.9	93795.4	105477
422000000000	21876.7	33782	38040.7	41715.3	61927.4	76505.8	93504	105573
423000000000	21922	33724.6	37986.9	41788.9	62120.2	76560.2	93701.5	105579
424000000000	21836.4	33829	38021.6	41705.2	62186.7	76293	93809.6	105816
425000000000	22037.5	34033.8	37978.8	41732.9	62252.2	76647.8	93865.6	105497
426000000000	21950.4	33841.9	38041.8	41595.7	62347.5	76504.3	93620.7	105880
427000000000	21870.5	33840.3	38019.4	41674.6	62186.7	76409.7	93808	105696
428000000000	21911.1	33845.8	38067.2	41726.7	62194.6	76803.7	93852.2	105631
429000000000	21965.4	33816.9	38102.5	41900.2	62424.1	76714.7	93878.4	105976
430000000000	21858	33841.3	38206.5	41846.6	62280.1	76634.4	93812.6	105925
431000000000	21971.5	33972.1	38047.2	41909.1	62596.7	76617.7	93788.2	105653
432000000000	21952.4	33962.4	38120.4	41783.5	62311.6	76802.3	94024.6	105887
433000000000	21943.1	33943.2	37988.9	41896.2	62403	76932.7	93833.7	105611
434000000000	21873.5	33943	38036.7	41891.1	62424	76743.1	94185.8	105655
435000000000	21952.7	33897.2	38047.5	41935.9	62506.1	76866.2	94081.7	105811
436000000000	21968.2	33953.4	38132.1	41967.6	62560.2	76773.2	93986.1	105760
437000000000	22038.6	33832.5	38030	41973.6	62524.4	77025.1	94005.2	105723
438000000000	21933.3	33933.8	38042.3	42089.8	62657.3	77082.2	94061.1	105759
439000000000	21797.6	33943.2	38164.2	41906.2	62613.4	76935.9	93985.9	105859
440000000000	21998.7	33929.7	38111.9	42107.4	62726.9	76978.1	94168.1	106005
441000000000	21946.8	33917	38106.5	42185	62690.7	77038.5	94094.9	105806
442000000000	21899.2	33956.3	38089.5	42015.4	62765.1	77130.5	94281.5	105844
443000000000	21972.9	33977.8	38108.5	42148.9	62788.3	77146.7	94239.9	105862
444000000000	21974.9	33920	38236.7	42119.8	62889.3	77223.1	94239	106090
445000000000	21880.9	33993.6	38153.8	42176.7	62986	77041.6	94196.7	105958
446000000000	21887.7	33917.6	38176.6	42207.1	62990.1	77316.6	94128.2	106111
447000000000	21882.7	34086.1	38078.3	42225.6	62964.4	77365.3	94387.9	105923
448000000000	21924.1	33984.6	38116.3	42209.6	62940.5	77401.4	94336.7	105831
449000000000	21910.4	34002.8	38168.3	42322.3	62960.7	77334.5	94159	105833
450000000000	21908.6	34065.3	38029.8	42289.2	62822.3	77391.4	94251.9	105834
451000000000	21899	33948.4	38233.8	42309.7	62933	77235.9	94270.5	105982
452000000000	21840.8	34059.7	38115.3	42351.9	63333.9	77454.3	94379.2	106112
453000000000	21939.4	34063.1	38148.1	42385.1	63183.1	77524.4	94378.5	106193
454000000000	21829.6	34025.7	38116.5	42331.1	63151	77509.2	94433.1	106161
455000000000	21926	33989.5	38114.1	42380	63285.1	77602.7	94417.1	106002
456000000000	21970.7	34054.4	38202.4	42422	63165.6	77551.3	94580.2	106337
457000000000	21882.4	34148.9	38144.4	42473.7	63225.1	77619.6	94455.6	106178
458000000000	21997	34151.2	38178.5	42389.1	63243.9	77598.7	94564.9	106294
459000000000	21964.1	34207.8	38181	42441.3	63326.1	77574.6	94414.6	106103
460000000000	21919.7	34163.4	38230.9	42358.3	63252.2	77661.6	94554.3	106196
461000000000	21821	34125.5	38135.7	42535.5	63416.7	77875.5	94658.4	106131
462000000000	21834.1	34127.3	38282.5	42423.7	63299.1	77765.6	94415.8	106150
463000000000	21854	34011.5	38252.8	42588	63424.9	77927.4	94541.4	106161
464000000000	22050.2	34101.7	38312.2	42561.7	63380.9	77837.1	94663.5	106373
465000000000	21847.5	34132.5	38100.4	42611.4	63466.2	78004.3	94647	106178
466000000000	21828.6	34133.1	38152.1	42631.8	63469.9	77829.4	94443.7	106219
467000000000	21966.4	34009.2	38124.6	42512.8	63608.6	77964.9	94732.8	106309
468000000000	21942.9	34058.2	38319	42508.8	63588.4	77892.7	94733.9	106118
469000000000	21888.8	34165.6	38281.3	42515.1	63573.6	77911.9	94744	106390
470000000000	21880	34245.7	38091.1	42646.1	63483.1	78159.7	94651.5	106481
471000000000	21895.3	34032.7	38093.9	42639.8	63646.9	78015.3	94732.9	106195
472000000000	21820.6	34220.2	38252.9	42683.9	63758.9	78015.1	94599.2	106457
473000000000	21885.1	34171.3	38235.9	42787.1	63427	78178.3	94856	106241
474000000000	21943.8	34221	38189.1	42709.4	63747.5	78194.5	94759	106506
475000000000	21913.6	34158.2	38317.3	42597.7	63639.6	78294.6	94887.4	106625
476000000000	21798.1	34141.4	38240.3	42789.7	63636.3	78440.7	94973.1	106453
477000000000	21846.8	34176	38307.5	42649.5	63739.7	78132.2	94796.8	106401
478000000000	21866.4	34244.6	38369.4	42870.9	63981.6	78278.9	94829.9	106612
479000000000	21841	34274.4	38303.4	42909.8	63908.6	78405.7	95024.6	106525
480000000000	21839.5	34295.8	38362.3	42932.5	63844.2	78299.4	95142.4	106585
481000000000	21891.5	34266.2	38193.8	42919.2	64110.3	78297.4	94952.4	106341
482000000000	21978.3	34235.8	38233.4	42888.2	63909.9	78627.9	94989.4	106386
483000000000	21867.9	34118.7	38343.6	42731.7	64082.9	78530.6	95002.2	106356
484000000000	21957.8	34187.3	38232.2	43038.1	63915.9	78389.8	94986.1	106685
485000000000	21878.7	34152.4	38258.1	42921.7	63882.7	78509	95038.2	106789
486000000000	21931.2	34257.6	38385	42989.5	64156.2	78557.8	94963	106882
487000000000	21830.5	34324.5	38295.9	42999.8	64162.1	78577.3	94924.5	106613
488000000000	21842.2	34323.6	38266	42948.2	64011.8	78596	94812.5	106768
489000000000	21863.3	34276.7	38331.5	43070	64037.2	78791.7	95061.9	106588
490000000000	21895.3	34394.8	38384.1	43087.8	64111	78584.7	95050.8	106713
491000000000	21874.7	34304	38387.5	42955.1	64159.6	78731.2	95091.2	106686
492000000000	21836.9	34236.5	38386.5	42905.8	64263.5	78478.8	95201.2	106492
493000000000	21849.9	34344.2	38330	42964.3	64386.7	78605.4	94996.6	106784
494000000000	21861.3	34233.8	38455.2	42967	64151.2	78692	95243.9	106737
495000000000	22038	34333.4	38319.7	43146.8	64264.8	78806	95221.2	106695
496000000000	21893.3	34282.4	38412.6	43252.4	64342.9	78916.5	95212.4	106541
497000000000	21828.1	34245	38203.1	43144	64492.9	78881.2	95171.9	106542
498000000000	21936.5	34297.4	38312.9	43041.1	64415.5	78792.9	95361.6	106831
499000000000	21936.3	34459.7	38300.1	43331.5	64603.5	78826.1	95151.4	106836
500000000000	21872.3	34377	38397.2	43230.4	64371.2	78816.2	95228.1	106835
501000000000	21886.7	34398.5	38362.6	43185.9	64572	78990.8	95037.3	106995
502000000000	21840.6	34528.1	38389.1	43387.1	64528.3	79172.3	95239.7	106875
503000000000	21867.2	34373.9	38323.5	43251.6	64524.4	79016.2	95308	106810
504000000000	21886	34359	38416.6	43330.7	64604	79083.6	95131.9	106708
505000000000	21855.3	34380.9	38322.6	43360	64602.5	79134.4	95378.6	106988
506000000000	21938.8	34455.1	38478.3	43292	64620.4	78927.9	95414.9	106941
507000000000	21916.6	34299.8	38326.7	43195.3	64767.9	79224.5	95208.5	106746
508000000000	21912.9	34319.9	38280.3	43337.3	64772.8	79189	95452.6	106746
509000000000	21907.4	34526.5	38231.8	43484.5	64716.4	79178.9	95284.5	106869
510000000000	21945.8	34377.9	38432.9	43405.1	64720.1	79179.5	95524.9	107078
511000000000	21857.2	34432.6	38415.4	43474.4	64661	79214.2	95289.1	107110
512000000000	21871.9	34527.8	38474.2	43446.9	64803.4	79201.9	95446.3	107166
513000000000	21822.4	34449.4	38350.6	43355.4	64821.8	79274.4	95242.4	106798
514000000000	21782.5	34457.7	38609.7	43471.6	64725.1	79197.2	95448.5	107201
515000000000	21813.7	34485.8	38493.9	43479.2	64978.6	79394	95464.2	106848
516000000000	21844.6	34359.4	38469.3	43475.7	64899.1	79347.3	95423.3	106958
517000000000	21855	34465.3	38388.8	43567.2	65035.7	79383.2	95669.1	107041
518000000000	21871.7	34419.5	38529	43576.6	64987.6	79411.8	95687.5	106954
519000000000	21980.7	34589.3	38493.9	43673.4	64931.8	79332.6	95415.9	106916
520000000000	22005.4	34490.1	38437.9	43548.1	64879.3	79388.2	95481.3	106959
521000000000	21998.5	34557.2	38457.3	43585.3	64900.2	79534.4	95671.1	107106
522000000000	21922.9	34478.4	38468.2	43716.8	65167.5	79471.8	95782.9	107103
523000000000	21918.7	34614.9	38402.2	43821.7	65054	79436.5	95515.1	107002
524000000000	21921.8	34486.6	38463	43705.6	64955.2	79561.3	95581.2	107131
525000000000	21819.2	34579	38430.6	43758.1	65101.3	79467.7	95683.6	107180
526000000000	21868.8	34658.3	38505.3	43667.7	65143.6	79776.4	95627.2	106989
527000000000	21936.8	34548.4	38502.9	43739.5	65214.6	79516	95692.4	107143
528000000000	21766.7	34644.9	38371.7	43750.6	65154.9	79598.1	95588.4	107135
529000000000	21844.8	34518.1	38413.4	43650.3	65246.6	79685.8	95478.7	107315
530000000000	21845.8	34581.1	38432.3	43782.1	65371.8	79624.9	95848.6	107299
531000000000	21891.5	34578.8	38505	43898.2	65108.7	79817.6	95796.6	107299
532000000000	21950.6	34573.1	38467.2	43779.2	65355.4	79932.3	95660.7	107301
533000000000	21933.5	34570.8	38385.2	43901.6	65405.1	79732.1	95703	107284
534000000000	21865.4	34720.2	38508.4	43822.9	65372.9	79730.5	95728.3	107226
535000000000	21904.2	34675.5	38551.1	43740.6	65394.2	79850.7	95606.4	107133
536000000000	21899.8	34635.9	38625.4	43976.6	65569.1	80041.5	95761.6	107400
537000000000	22021	34768.1	38541.9	44078.6	65521.6	80002.8	95865.4	107534
538000000000	22054	34562.4	38611.1	43992.9	65489.7	80004.3	95759.7	107150
539000000000	21957.6	34716.9	38476.1	44132.6	65641	79913.9	95860.1	107236
540000000000	21909	34677.3	38418.3	44094.1	65661.8	79955.4	95926	107363
541000000000	21903.9	34683.1	38497.5	44015.4	65609.1	79906.9	95805.6	107277
542000000000	21874.7	34729.7	38536.3	44147.5	65493.2	80129.1	95955.8	107329
543000000000	21921.2	34760.4	38554.8	44076.9	65532.6	80124.9	95852.7	107364
544000000000	21876.6	34716.1	38518.2	43972.8	65636.6	79979.1	95984.8	107440
545000000000	21951.8	34700.8	38672.2	44076.2	65714.3	80060	95899.4	107297
546000000000	21823.9	34764.3	38576.6	44063	65608.5	80122.8	95822.4	107321
547000000000	21855.2	34768.6	38485.2	44268.9	65718.4	80070.5	96012	107337
548000000000	21800.3	34834.8	38544.7	44241.3	65571.4	80265.3	95929.2	107409
549000000000	21915.3	34742.9	38625.6	44246.8	65756.7	80197.1	96012.1	107430
550000000000	21863.7	34860.1	38493.2	44145.4	65756.1	80235.1	96077.4	107467
551000000000	21951.3	34744.8	38632.7	44345.6	65770.3	80222.9	96195.5	107527
552000000000	21883.7	34742	38496.6	44183.1	65750	80114.7	96048.1	107446
553000000000	21800.8	34799.4	38352.6	44326.9	65875.1	80145	96143.1	107662
554000000000	21869.3	34777.2	38572.4	44289.4	65794.8	80318.1	96103.3	107513
555000000000	21831.4	34771.8	38649.4	44466.9	65995	80165.3	96033.9	107648
556000000000	21910	34787.1	38457.9	44388.7	65885.5	80285.7	96030.5	107612
557000000000	21880.5	34871	38567	44277.7	66022.3	80471.2	96145.4	107532
558000000000	21889	34784.1	38690.1	44376.1	65888.3	80390.4	96296.2	107423
559000000000	21916.9	34810.4	38578.8	44642.5	66021.3	80323.5	96245.2	107803
560000000000	21926.4	34859.7	38492	44323.5	66135.7	80304.6	96424.9	107511
561000000000	21830.4	34856.5	38628.9	44357.4	66055.3	80482.4	96189.3	107679
562000000000	21813.2	34852	38449.7	44551.5	66035.4	80332.5	96323.9	107833
563000000000	21868.6	34809.4	38622.1	44428.6	66025.9	80653.6	96359	107710
564000000000	21893.3	34756.2	38558.1	44654.7	66156.3	80351.7	96089.1	107670
565000000000	21830.1	34830.3	38569.6	44583.3	65932.9	80403.1	96382	107558
566000000000	21898	34857.2	38589.9	44670.5	66176.9	80484.3	96270.6	107667
567000000000	21905.4	34973.4	38658.3	44558.7	66180.5	80550.9	96393.7	107543
568000000000	21868.2	34917.1	38569.1	44670.8	66288.2	80467.1	96441	107593
569000000000	21945.1	34995.4	38558	44621.3	66051.2	80394.5	96306	107563
570000000000	21886	34998.9	38590.5	44736.9	66288	80385.5	96582.1	107502
571000000000	21956.7	34930.1	38635.4	44598.6	66216.8	80772.1	96420.3	107788
572000000000	21826	34966.7	38528.9	44697.7	66464.5	80656.6	96464.3	107337
573000000000	21854.2	34939.9	38631.6	44658.4	66388.9	80752.3	96422.6	107664
574000000000	21881.5	35135.6	38553.5	44812.7	66350.5	80592.4	96264.5	107700
575000000000	21902.2	34977.5	38511.8	44819.6	66396.8	80626.1	96384.7	107679
576000000000	21835.2	34867.4	38650	44790.7	66540.7	80757.1	96384.6	107757
577000000000	21829	34911.7	38646.2	44784.9	66237	80666.8	96185.1	107769
578000000000	21892.3	35047.6	38702.4	44732.2	66544.7	80753.4	96417.4	107631
579000000000	21892	34934.3	38693.1	44895	66536.6	80693.5	96499.6	107672
580000000000	21767.5	34995.2	38706.4	44867.5	66485.6	80856.3	96654.5	107528
581000000000	21913	35037.6	38625.5	44779.2	66488.8	80970.4	96473.5	107855
582000000000	21872.2	35119.1	38612.8	44927.4	66569.7	80804	96499.4	107840
583000000000	21902.1	35001.3	38679.6	44916.4	66557.4	81038.6	96686.1	107900
584000000000	21845.6	35103.9	38638.2	44939.6	66401.7	80825.8	96556.7	107842
585000000000	21906.1	35047.2	38507.3	44862.1	66436.6	80760	96782.9	107930
586000000000	21941.7	35023.8	38696.4	44998.1	66569.2	80919.9	96525.9	107750
587000000000	21813.7	34985.8	38587.7	44976.4	66735.2	80904.2	96654.1	107839
588000000000	21829.3	35006.2	38671.8	45012.9	66621.2	80951.6	96710.6	107667
589000000000	21877.4	35018.4	38746.8	45039.8	66573.5	80983.7	96694.2	107878
590000000000	21896.3	35045.5	38726.9	45046	66631.6	81065.5	96654.3	107670
591000000000	21950.5	35100.9	38719.7	45131	66813.1	81082.3	96619.8	107733
592000000000	21959.6	35138.3	38742	45120.2	66838	81098.6	96740.6	107918
593000000000	21850.4	35112.4	38583.1	45246.9	66801.7	81241.9	96570.4	107865
594000000000	21881.1	35073.4	38637.9	45234.5	66931.1	81012.4	96788.6	107843
595000000000	21879.6	35185.1	38672	45192.3	66895.7	81196.9	96758.9	107741
596000000000	21912.9	35117.4	38619.1	45167	66788.8	81279	96565.8	107909
597000000000	21900	35179.7	38689.8	45175.2	66791.1	81206.9	96851.1	107690
598000000000	21908.8	35164.1	38589.6	45308.5	66775.7	81292.8	96848.3	107737
599000000000	21890.8	35208.4	38693.8	45346.4	66906.9	81153.4	96802.3	107945
600000000000	21876.8	35206.8	38744.1	45323	66947	81025.6	96580.9	107943

## Sheet: Sheet1
Time(s)	0mM	0.13mM	0.26mM	0.52mM	1.04mM	2.08mM	4.1mM	8.3mM
0	22325.7	21880.1	20369.3	20279.5	24776.4	28923	32023.3	33503.4
1	22378.2	22027.7	20488.6	20420.2	25168.6	29390.9	32448.5	33933.2
2	22327.6	22166.3	20459.3	20528	25549.1	29814.2	32982.8	34531.5
3	22426.5	22218.5	20590.8	20711.4	26020.9	30215.2	33563.6	35108.4
4	22367.9	22397.7	20689.7	20804.8	26419.5	30674.6	33990.8	35459.9
5	22411.2	22559.6	20834.9	21059.7	26856.2	31035.1	34435	35911.2
6	22358	22548.6	20803.4	21217.2	27156.1	31410.8	34831.4	36388.7
7	22383.4	22707	20918.5	21503.7	27643.2	31743.3	35239	36765.1
8	22306	22786.3	21044.8	21510.9	28033.1	32221.2	35752.9	37240.6
9	22269	22928.8	21219.1	21729.5	28335.1	32538.8	36191.2	37834.8
10	22162.5	22948.9	21324.3	21925	28784.4	32798.5	36708.8	38148.4
11	22249.1	23037	21311.8	22071.8	29097.1	33180	37185.7	38497.8
12	22326.8	23053.2	21472.8	22227	29531.1	33463.2	37638.2	38821.8
13	22169.2	23245.4	21568.2	22477.7	29795.1	33680.7	38244.4	39300.9
14	22201.1	23373.4	21608.7	22688.2	30109.8	34125.4	38713.1	39705.8
15	22234.3	23281.1	21741.7	22921.9	30363.3	34412.8	39138.1	40093.2
16	22273	23480.9	21786.6	23021.8	30750.1	34521.4	39639.1	40755.8
17	22257	23578.3	22012.1	23155.7	31283.3	34922.5	40318.9	41034.1
18	22185.7	23653	22020.6	23364.4	31431.3	35285.1	40893.8	41514.3
19	22169.7	23638	22055.6	23590.6	31774.9	35499.5	41380.2	42114.2
20	22357.7	23794.3	22404.9	23718.1	32022.9	35778.8	42115.5	42503.8
21	22216.4	23922.7	22360.7	23999.3	32415.5	36051.7	42494.2	43079.5
22	22365.4	24026.8	22393	24147.9	32698.2	36454.8	43084.7	43563.4
23	22313.3	23953.2	22541.3	24342.3	33012.9	36682	43803.4	44018.9
24	22359	24140.2	22677.7	24589.9	33252.8	36915.2	44391.1	44602.6
25	22230.9	24212.9	22717.9	24690	33528.9	37221.1	44898.4	45181.8
26	22316.4	24277.3	22896.7	24940	33758	37352.7	45398.4	45681.7
27	22278.5	24373.9	22898.5	25061.6	34107	37742.6	45975.3	46310.1
28	22107.6	24379.9	23100	25286.2	34430.2	37991.7	46358.8	46988.1
29	22152	24377.6	23175.7	25447.2	34615.2	38268.7	46800.1	47718
30	22188.8	24580.2	23168.7	25693.2	34912.6	38429.7	47442.5	48428.1
31	22038.7	24636.7	23377.3	25840	35080.5	38741.2	47699.1	49179.2
32	22232.5	24712.9	23386.2	26024.8	35454.7	39088.5	48148.4	50026
33	22132.8	24831.5	23521.5	26220.4	35670.2	39217.2	48597.2	50609.5
34	22042.6	24900.7	23675.2	26410.1	35798.4	39549.9	49203.6	51520
35	22156.9	24866.4	23789.8	26568.6	36059	39633.6	49473.4	52174.9
36	22124.6	24937.8	23735.2	26785.1	36204.1	39957.7	50104.3	53140.7
37	22097.6	25067.3	23940.1	26930.9	36423	40114.4	50340	53887.3
38	22171	25088.3	23929.2	27161.6	36577.2	40426.6	50778.2	54487.8
39	22201.6	25105.2	24127.3	27306.3	36853.4	40666.2	51192.8	55293.2
40	22120.3	25164.6	24177.9	27464.3	36953.7	40952.6	51587.2	55979.8
41	22172	25326.5	24303.7	27737.2	37148.4	41117.9	52069.8	56790.2
42	22106.1	25313.8	24392.8	27915.1	37450.7	41455.6	52369.4	57302.7
43	22117.5	25355.1	24545.2	28089.4	37564.4	41635	52784.7	57944.9
44	22120.9	25493.2	24577.4	28125.2	37802	41824.1	53091.9	58483.3
45	22111.3	25477.8	24678.7	28357.2	37844.3	42137.5	53430.6	59020.2
46	22085.7	25612.5	24812.9	28494.7	38062.2	42367.7	53933.8	59626.7
47	21953.6	25694.9	24997.6	28757.1	38151.8	42451	54204.8	60263.5
48	22056	25689.6	24925.7	28764.1	38283.4	42637.7	54628.4	60695.7
49	22089.7	25809.9	25217.6	28858.7	38423.8	42711.2	55021.2	61046.3
50	22063.7	25728.5	25130.6	29094.6	38447.1	43150.8	55203.1	61525.4
51	22010.6	25862.5	25330.3	29254.2	38702.7	43246.4	55632.9	62144.2
52	22049.6	25986.9	25472.2	29459.4	38890.4	43541.8	55942.6	62420.8
53	22015.6	26027.7	25527.4	29544.3	38923.6	43813.4	56257.6	62970.2
54	21971.4	26141	25574	29624.8	39050.2	44039.8	56563.2	63284.4
55	22046.8	26098.9	25712.2	29811	39180.6	44159.2	57001.2	63732.8
56	22016.3	26075.1	25853.8	30051.8	39198.9	44378.3	57250.4	64198
57	21896.8	26234.2	25965.2	30140.9	39257.6	44621	57559.9	64664.4
58	21965.3	26170.4	25973.7	30225.9	39481.9	44740.4	58011.9	65257.1
59	21882.4	26334.8	26078.9	30410.3	39430.8	44933.8	58269.2	65425.3
60	22032.4	26445.1	26000.6	30623.9	39668.7	45076.5	58432.2	65774.4
61	21834.6	26322.7	26424.9	30663.1	39634.1	45252.3	58572.5	66279.1
62	21996.4	26534	26367.9	30912.7	39768.7	45530.2	59027.5	66509.8
63	22003.6	26550.6	26574.7	30899.9	39983.6	45777.2	59189.1	66927.8
64	22057.4	26642.9	26552.3	30991.6	40210.8	45997.6	59448.5	67244.9
65	21987.7	26624.9	26679.2	31204.2	40184.2	46226.2	59844.9	67612
66	21990.9	26756.3	26662.1	31347.9	40203.6	46457.5	59998.9	67906.5
67	21924.4	26747.3	26758.1	31457	40378.3	46678.3	60372.5	68289.2
68	22119.7	26871.7	26995.8	31547.6	40397.4	46851.5	60628.4	68745.7
69	22024.3	26868.3	27022.5	31698.1	40371.5	47022.1	60876.1	68897.1
70	22042.7	26783.1	27043.6	31854.2	40621.7	47208.2	61149.9	69407.2
71	21915.6	26940.8	27304.9	31911.5	40517.3	47456.9	61331.2	69809.9
72	21983.3	27021.7	27319.1	32175	40728.2	47660.3	61564.6	70049.3
73	22030.3	27042.9	27401.4	32171.5	40958.3	47977	61813.7	70424.4
74	21966.6	26993.6	27345	32205.5	41026.6	48068	62059	70675.9
75	21904.5	27152.3	27565.6	32515.4	41103.7	48289.8	62177.9	70992.1
76	22087.9	27107	27690.4	32585.4	40980.8	48407.5	62725.1	71521.2
77	21974.6	27253.4	27687.9	32584.7	41295.8	48652.5	63018	71852.5
78	21879.4	27187.2	27862	32689.8	41178.6	48884.5	63330.4	71943.9
79	21941	27230.4	27916.9	32798.6	41402.8	49067.4	63560.6	72517.7
80	22003.7	27425.6	27972.5	32941.9	41319.9	49357.7	63832.8	72602
81	21998	27383.9	28101.3	33161.2	41427.7	49498.1	63998.9	72915.1
82	21985.1	27391.3	28172.1	33214	41675.3	49693.8	63992.2	73413
83	22018.1	27486.5	28167.4	33328.8	41594.5	49948.2	64442.2	73602.7
84	22040.4	27583.1	28380.4	33316.4	41749.3	50107.7	64708.1	74039.1
85	22004.4	27560.1	28413.5	33364.6	41859.1	50322.9	64979.8	74186.2
86	21964.8	27641	28475.8	33580.2	41804.6	50409.2	65296.6	74751.3
87	21932.8	27751.9	28392.7	33607.9	42088.7	50635.4	65343.3	75147.8
88	21999.3	27748.7	28606	33701.3	42196	50736.1	65681.1	75315
89	21982.6	27735.4	28650.5	33740.8	42200.6	51134.4	65890.1	75809.3
90	21902.6	27780	28824.8	33871.5	42309.9	51144.6	66166.1	76016.3
91	21926.7	27857.1	28882.5	33953	42337.6	51311.7	66330	76316.8
92	21995.3	27796.7	28849.1	34069.1	42500.5	51475.8	66568.2	76559.8
93	22019.6	28018.8	29009	34239.9	42511.6	51517	66832.5	77001.4
94	22001.7	28015.4	29152	34230.8	42512.8	51733.6	66877.3	77435.4
95	21976.5	28015.7	29218.9	34408.4	42614.4	51878.4	67148.2	77622.4
96	21955.2	28109.2	29268.7	34424.6	42862.5	52140	67388.1	77756.6
97	21987.5	28234.5	29291.4	34404.8	42760.8	52156.9	67610.3	78441.2
98	21869.5	28220.2	29419.2	34475.4	43032.7	52393.9	67793.6	78329.7
99	21912.2	28166.3	29492.5	34655.3	43080.1	52626.1	67968.8	78645.9
100	21934.7	28253.4	29452.6	34620.6	43024	52807.2	68252.2	78862
101	21977.8	28332.9	29621.9	34681.9	43188.1	52957.2	68178.4	79240.9
102	21960.3	28301.8	29591.6	34767.2	43285.7	53245.7	68537.6	79614.5
103	21979.7	28396.4	29793.7	34783.5	43460	53109.2	68655.2	79639.7
104	21934.3	28468.2	29718.6	34927.3	43432	53269.8	68654.6	80204.3
105	21891.4	28431.5	29898.5	35012.2	43484.8	53528.1	69122.4	80181.1
106	21990.4	28581.7	29997.1	34946.6	43666.1	53579.5	69333.9	80374.5
107	21977.1	28578.7	30023	35070.3	43718.9	53865.3	69280.2	80816.9
108	22031	28487.7	30050	35166.5	43716.8	53926.5	69733.8	80995.5
109	21932.2	28676.9	30079.7	35193.3	43836.3	54082.6	69927.6	81113.9
110	21940.7	28707.9	30254.3	35230.1	43886.9	54371.1	70042.8	81401.9
111	21935.6	28732.7	30319.8	35416.2	44093.2	54461.9	70263.5	81861.7
112	21917.1	28774.8	30320.2	35408.8	44047.9	54636	70179.4	82010
113	21971.2	28798.8	30420	35522.7	44058.4	54909.5	70461.5	82121.6
114	21992.3	28893.2	30396.7	35610.8	44284.2	54881.8	70767.7	82382.3
115	21971	28908.7	30613.4	35544.2	44425.7	55039.9	70733.5	82626.2
116	21872.8	29029.5	30523.1	35557.9	44390.4	55093.4	70958.6	82596.3
117	22042.7	28936.9	30737.3	35621.2	44437.9	55267	71261.2	83262.6
118	21972.7	28947.1	30639.7	35764.6	44626.9	55350.9	71557	83170.3
119	21939.9	29046.8	30888.2	35751.8	44661.1	55455.9	71486.2	83512.8
120	22057.9	29144	30872.4	35861.1	44958.3	55720.9	71848.7	83746.9
121	21975.3	29068	30985	35862.5	44883.4	55860.1	71841.2	83737.6
122	21958.1	29193.5	30939.7	35825.4	45087.4	56047.6	72043.5	84029.2
123	22027.3	29206.5	31051.5	35961.8	45186.1	56067.9	72245.4	84393.7
124	21892.1	29270.2	31146.7	35946.8	45176.2	56241.1	72308.6	84514
125	22023.4	29286.5	31206.6	36029.6	45142.5	56331.5	72444.4	84749
126	21933.3	29333.3	31127.5	36044.7	45286.1	56348	72790.6	84692.9
127	22013.6	29352.4	31262.7	36146.5	45497	56600.7	72878.4	84999.6
128	21955.7	29414.2	31352.4	36119.9	45458.7	56629	72994.1	85406.2
129	21924.1	29395.3	31399.4	36221.6	45568	56844.1	72847.1	85761.6
130	22024.1	29483.8	31522.6	36199.5	45743.8	57099	73159.7	85806.6
131	22024.9	29498.1	31579	36276.7	45772	57082.6	73514.5	85966.9
132	22010.6	29505.9	31533.1	36261.1	45825.1	57117.3	73773	86235
133	22040.4	29554.9	31622.5	36373.3	46008.1	57291.2	73925.8	86435.8
134	21979.9	29725.6	31652.9	36382.2	46044.6	57554	74151.1	86821.3
135	21963.9	29678	31735.3	36447.3	46123.2	57662.1	74078.2	86851.2
136	22091.6	29742.8	31716.7	36434.3	46214.6	57618.7	74399.7	87057
137	22027.9	29665.5	31965.6	36412.9	46273.7	57717.4	74349.4	87333.3
138	21965.6	29694	31990.3	36594	46376.1	57808.9	74519.6	87490.3
139	21971.7	29805.6	31960.1	36468.6	46521.9	58010.6	74864.4	87873
140	21967.8	29877.5	32108.6	36656.9	46398.9	58187.1	74797.5	87937.3
141	21974.3	29822.6	32033.7	36763.6	46687.1	58186.9	75195.4	87855.1
142	22026.5	29895.7	31976.4	36620.5	46721.9	58231.3	75366.7	88248.9
143	21994.9	29936.4	32072.3	36658.5	46839	58533	75487.1	88605.4
144	21865.2	29951.2	32151	36850.3	46853.5	58664.6	75538.6	88608.6
145	21943.3	30012.6	32281	36788	46895.1	58609.9	75717.7	88827.1
146	22047.3	30069.2	32276.6	36770.5	46859.1	58757.3	76133.2	88981.8
147	21906.6	30065.4	32332.4	36724.5	47022.2	58951.9	76152.5	89239.6
148	21970.9	29967.4	32413.8	36796.7	47188.2	59119.7	76150.9	89630.2
149	21930.1	30291.9	32412.7	37054	47202.6	59111.2	76286.6	89610.4
150	21959	30096.8	32444.3	36973.4	47410.1	59423.8	76447.8	89827.3
151	22048.7	30272.6	32644.5	36997.1	47548.9	59403.1	76618.2	89858.6
152	21906.9	30177.5	32501.7	36965.7	47695.4	59441.5	76850.7	90125.9
153	21903.5	30147.8	32712.8	37030.4	47656.2	59582.9	76918.1	90236.3
154	21889	30270.6	32718.4	37094.3	47683.8	59620.1	77050.2	90487.9
155	21956	30241.1	32756.3	37066.6	47723.5	59852.9	77296.7	90599.9
156	21949.3	30312.5	32724	37120.3	47956.2	59935.5	77161.2	90793.1
157	21966.5	30420.7	32837	37048.5	48027.1	60033.3	77637.4	91144.1
158	21899	30410.6	32894.1	37154.2	48139.5	59984.6	77587.8	91076.7
159	21992.3	30382.2	32953.2	37305.7	48263.9	59979.8	77693.8	91288.3
160	21977	30406.1	33001.5	37210.2	48311.3	60157.1	77970.7	91455.2
161	21997.8	30512.7	33045	37307	48396.6	60403.5	78049.1	91600.5
162	21961.9	30551.3	33129.7	37219	48444.2	60491.7	78138.2	91778.1
163	22104.3	30607.6	33066.9	37218.1	48541.9	60436.3	78220.9	92131.6
164	22000.4	30581.2	33075.3	37414.8	48612.8	60673.8	78332.9	92122.9
165	21949.2	30656.3	33242.9	37416.2	48624	60658.6	78695.1	92180.3
166	22062	30778.5	33274.7	37371.6	48626.9	60908.6	78686.2	92385.8
167	21987.2	30681.5	33270.3	37465.3	48772	60933.2	78697.1	92612.8
168	21930.1	30673	33321.6	37492.9	48844.6	60895.9	78890.3	92817.5
169	21990.5	30765.5	33476.4	37471.2	48970.4	61184.8	79010.6	92798.9
170	21933.5	30799.6	33430.2	37523	49046.9	61123.5	79105.5	92971.9
171	22002.5	30660.5	33436	37410.5	49173	61220.5	79266	93041.2
172	21930.8	30899.2	33529	37574.7	49380.7	61263.3	79288.4	93138.6
173	21979	30816.6	33586.4	37535.9	49352	61563.4	79362.8	93386.5
174	22009.7	30904.7	33540	37475.9	49486.2	61621.9	79649.3	93541.4
175	22009.8	30973.9	33568.4	37615.3	49449.8	61627.8	79665.3	93611.4
176	22005.5	30846.3	33787.1	37676.6	49581.1	61895.4	79750.9	93569.8
177	21913.3	30953.5	33753.8	37613.5	49684.9	61801.1	80076.8	93514.6
178	21973.4	31019.3	33725.4	37530.7	49833.8	61840.8	80000.3	93749
179	21930.3	31051	33850.7	37632.4	49749.8	62101.8	80075.9	93846.8
180	21920	31000.6	33770.4	37617.2	49827.3	62002.8	80407.9	93816.3
181	21919.5	31122.6	33824.6	37728.4	49925.3	62194.5	80550.3	94099.8
182	21978.2	31117.5	33938	37725.3	49986.3	62236.5	80666.1	94185
183	22006.9	31113.1	33958.9	37669.1	50010.3	62459.3	80705.1	94328.9
184	21963.2	31081.1	33943	37844.6	50286.7	62471.4	80796.9	94394
185	22026.4	31148.2	33928.8	37771	50222.6	62450.6	80909.8	94729.1
186	21963.9	31217.9	34039.6	37672	50441.3	62525.3	81034	94797.8
187	21972.7	31212.9	34126.2	37802.7	50337	62586.1	81297.2	94629.8
188	22001.7	31202.1	34144.4	37888.1	50412.9	62921.3	81135.2	94658.7
189	22049.6	31264.7	34112.4	37857.3	50547.2	62734.9	81346.1	94986.7
190	22027.5	31246.1	34266.6	37935.1	50766.1	62989.2	81551.5	95059.5
191	21955.7	31427.2	34216.2	37872.8	50757	63094.8	81504.5	95202.6
192	22017.5	31332.2	34278.1	37897.9	50761.5	63072.4	81595	95115.5
193	21950.3	31330.6	34445.4	37937.6	50793.3	63187.1	81831.9	95452.1
194	21965.1	31311.6	34392.3	37860.1	51119.5	63226.7	81934.9	95376.1
195	21979.2	31421.3	34352	37974.3	51153.9	63206.9	81965	95584.6
196	21963.4	31462.4	34374.9	38121.8	51183.9	63409.8	82166.8	95560.3
197	21966.4	31450.2	34349.3	38125.9	51291.9	63433.9	82174.4	95472.5
198	22002.2	31427.1	34405.7	37950.8	51305.1	63494.1	82397	95764.6
199	21991.3	31551.5	34563.7	38057.4	51305.1	63619.7	82211.7	95881.4
200	21915.3	31477.1	34584	38035.2	51409	63664.6	82645	95958.2
201	21983.6	31592.6	34530.2	38080.6	51547	63795.2	82790.4	96037.4
202	22007.2	31567.5	34665.6	38016.1	51622	64014.7	82769.5	95953.4
203	21909.8	31476.8	34635	38054.6	51598.2	63937.2	82836.7	96159.8
204	21956.4	31586.3	34751.4	38148.6	51655.6	64111.3	82885.7	96093.7
205	21953.2	31604	34746.6	38219.3	51697.4	64235.9	83070.3	96324.9
206	21984	31606.6	34760.9	38256	51888.3	64150.5	83173.6	96261.1
207	21993.2	31719	34680.2	38177.9	51894.1	64272.6	83289.4	96206.2
208	21998.4	31600.5	34810.7	38187.3	52111.6	64471.2	83332.2	96327.7
209	21887.3	31781.3	34750.8	38170.8	51944.1	64613.1	83367	96558.6
210	22013.7	31655.4	34878	38288.1	52152.3	64510.4	83704.6	96713.3
211	21917.2	31782.8	34834	38179.3	52118.1	64623.8	83748.6	96529.8
212	21961.9	31710.4	34893.6	38285.4	52407.7	64724.7	83737.8	96793
213	21954.6	31717.4	35003.5	38375.4	52413.7	64890.1	83854.7	96840.9
214	22032.9	31799.7	34995.7	38389.9	52437.4	64877.9	83889.1	96769.1
215	22003.4	31789.1	34953.4	38246.3	52309	65066.5	83946.3	97011.8
216	22036.4	31883.3	34972.6	38363	52481.5	65163.8	84122	96923.7
217	21898.6	31903.9	35097.3	38298.6	52660.6	65076.6	84276.8	96968.8
218	21880.3	31982.9	34940.2	38180.2	52802	65315	84444.8	97127.3
219	21967.4	31757.2	35194.3	38384.5	52733.8	65416.5	84409.1	97194.7
220	21895.2	31879.8	35150.7	38266	52858.2	65338.4	84492.8	97262.2
221	21996.4	31946.8	35111.2	38395.4	52941.4	65386.6	84668.4	97287.7
222	22069.1	31894.6	35245.7	38305	52949.8	65504.4	84716	97299.6
223	21948.2	31994.7	35270.2	38326.8	53096.4	65792.9	84731.7	97398.9
224	22000.9	31927.1	35312.3	38383.7	53192.1	65800.2	84936.2	97539.4
225	21933.8	32103.5	35308.4	38316.7	53256.8	65734.3	84726.9	97636.6
226	21976.2	31928.6	35309	38404	53126.6	65964	85031.3	97537.1
227	21982.5	32048	35399.6	38548.7	53371.2	65984.9	85019.3	97978.9
228	21934.1	32031.7	35472.9	38541.9	53504.4	66066.8	85153.3	97920.6
229	21950.3	32055.1	35379.6	38523.3	53430.7	66185	85080.9	97806.9
230	21996.5	32024.4	35506.5	38582.9	53505.3	66091.4	85077.2	97815.2
231	21982.7	32015.2	35409.5	38639.4	53577.9	66255.5	85360.7	97905.6
232	21965	32165.2	35390.4	38631.7	53614.1	66326.3	85274.6	97986.4
233	21982.9	32049.7	35292.4	38518	53651	66529.4	85350.5	97885.8
234	21929.4	32110.9	35609.7	38588.2	53823.1	66557.5	85425.5	98037.3
235	21896.3	32102	35516.2	38631.7	53836.1	66483.7	85535.4	98117.2
236	21904.9	32126	35511.2	38658.1	53899.1	66746.4	85781.5	98326
237	21972.3	32157.6	35761.1	38635.9	53980.2	66676	85684.9	98477.7
238	22015.3	32178.2	35687.5	38703.4	54073.9	66867.4	85968.8	98484.6
239	21919.7	32186.8	35667.5	38654.7	54180.1	66863.8	86022.4	98633.2
240	21961.8	32227.3	35662.3	38757.3	54257.4	66991.6	86041.9	98505
241	21996.7	32194.8	35755.3	38712.6	54226.1	67138	86154.9	98606.2
242	22011	32205.4	35820	38747.9	54507.8	67158.3	86168.1	98738
243	21988.6	32386.2	35721.1	38633	54402.6	66993.2	86101.7	98743.3
244	21853.1	32295.3	35751.8	38770.9	54358	67160.6	86327.6	98887.8
245	21951.9	32237.3	35718.8	38845.6	54530.8	67220.1	86543.9	98874.6
246	21893.7	32321.3	35733.3	38792.1	54576.8	67441.1	86431.6	99084.1
247	22103.2	32319	35884.6	38898.3	54740.6	67498.8	86248.8	99298.9
248	21942.5	32392.7	35930.4	38891.1	54734.2	67570.4	86558.6	98992.1
249	22032.8	32305.6	35807.1	38837.8	54710.9	67763.8	86587.2	99253.4
250	21946.5	32420.2	36000.8	38923.5	54660.9	67650.1	86575.9	99193.6
251	21964.9	32294.9	35972.9	38819.6	54854.1	67793.4	86610.6	99584.4
252	21939.7	32539.5	36023.9	38860	54923.2	67764.4	86946.7	99361.4
253	21966.8	32366	35959.6	38939.5	54971.3	67792.6	86940.6	99542.3
254	22009.2	32344.4	36079.6	38904.5	55036.8	67957.6	86941.9	99688.8
255	22007.8	32409.4	35991.1	38887	55061.6	67920	86886	99544.3
256	21961.2	32409.3	35966.2	38979.6	55112.5	68003.9	86899.2	99669
257	21953.6	32557.1	36100.2	38951.8	55126.5	68107	86963.8	99729.7
258	21952.9	32428.1	36145.8	38874	55266.5	68212.7	86930.1	99850.1
259	21970	32532.9	36034.4	38975.2	55378.6	68258.7	87088	99933.6
260	21924.1	32567.9	36227	38976.6	55500.3	68415.1	87276.2	99913.6
261	22001.5	32437.9	36121.9	39113.8	55380.8	68404.1	87293.4	100005
262	21902.5	32570.6	36200.5	38996.9	55619.2	68363.5	87331.3	99965.4
263	22001.3	32557.6	36174.2	39023.7	55643.6	68573.4	87237.1	100109
264	22012.8	32552.6	36278.6	38988.1	55667.2	68370.2	87481.2	100102
265	22067.3	32539.1	36231.5	39033.7	55552.2	68756.4	87579.8	100187
266	22013.1	32414.7	36379	39033.7	55645.5	68604.3	87566.9	100356
267	21991.3	32703.9	36205.8	39203.7	55766.2	68738.5	87542.6	100460
268	21938.5	32625.2	36323.7	39125.6	55796.1	68841.7	87654.1	100574
269	21975.9	32546.9	36280.8	39069.7	55915.6	68892.9	87737.9	100540
270	22028.3	32508.9	36332.1	39177.5	55880.6	68973.7	87978.4	100442
271	22017.6	32603.3	36405.4	39176.1	55963.4	69066.2	87798.3	100443
272	21927.8	32659.8	36434.6	39160.8	56071.2	68942.2	87862.9	100556
273	21994.4	32746.3	36332.5	39038.6	56107.4	69166.3	88079.6	100666
274	21978.3	32651.9	36406.4	39299.3	56023	69319.4	87886.7	100722
275	21968.8	32864.2	36479.9	39184.8	56068.9	69305.8	88084.2	100719
276	21971.9	32586	36390.7	39117.7	56276.6	69238.7	88198.4	100844
277	21931.9	32760	36476.8	39279.5	56374.6	69507	88345.1	100924
278	21903.7	32838.2	36467.1	39310.3	56271.1	69449.8	88322.8	100997
279	21934.1	32639	36474.5	39320.3	56347.5	69556.2	88351.8	100986
280	21920.3	32778.5	36548.8	39324.9	56517.4	69586.7	88334.4	101071
281	21994.5	32787	36676.2	39297.4	56407.3	69563.2	88543.9	101030
282	21879.2	32801.2	36595.1	39269.8	56410.3	69688.9	88549.9	101076
283	21896.2	32848.1	36549	39261.5	56567.9	69738.9	88604	101352
284	22009.3	32692.8	36605.1	39330.2	56678.1	69692.6	88511.5	101414
285	22027.2	32704.9	36618.2	39357.4	56743.7	69727.3	88650.8	101342
286	21952.7	32823.5	36570.8	39373.1	56758.2	69975.6	88810.1	101443
287	22028.3	32733.8	36604.9	39471.2	56780.9	70005.5	89010.8	101283
288	21882.2	32740.7	36629.4	39447.5	56792.2	69851.6	88977.3	101476
289	21892.9	32865.5	36698.6	39504.2	56880.9	70051.3	88798.5	101330
290	21999.6	32852.3	36657.6	39424.9	56898.2	69953.8	88882.7	101487
291	21949.4	32851.9	36737.9	39424.6	57069.4	70120	88911.9	101576
292	21932.4	32791.8	36783.5	39569	56952.1	70389.4	89135.4	101689
293	21968.9	32831.3	36851.4	39581.1	57031	70315.9	89130.1	101747
294	21970.5	32878.4	36858	39628.5	57143.2	70199.5	89406.5	101839
295	21941.1	32875.6	36771.7	39525.6	57302.4	70373.9	89301.3	101926
296	21857.4	32987.9	36894.4	39531.5	57231.4	70454.7	89313.8	101689
297	22016.8	32889.5	36769.1	39634.8	57333.4	70673.1	89461.7	101959
298	21913.4	32810.6	36823.4	39584.5	57304.8	70632.6	89478.8	101998
299	21985.2	32923.3	36882.3	39614.4	57470.8	70609.7	89485.1	101930
300	21969.2	32892.4	36858.6	39598.4	57359.3	70579.7	89481.1	101924
301	21957.9	32925.1	36838	39719.4	57433.6	70538	89484.6	101864
302	21908.4	32965.2	37052.2	39635.6	57415.6	70722.3	89689	101802
303	21944.3	33038.2	37026.7	39630.8	57543.8	70675.3	89719.1	102131
304	21957.4	33086.9	36919.1	39603	57564.5	70910.9	89743.9	102084
305	21928.2	32874.2	36997	39621.6	57644.2	70845.7	89700.7	102136
306	21977.9	32857.2	37063.9	39750.1	57678.1	70924.9	89954.5	102004
307	21967.6	32984.5	36970.6	39602.8	57834.8	71017.5	89875	102190
308	21896.1	33046.1	37071.7	39771.5	57766.4	71081.5	89900.7	102182
309	22010.2	33060.4	37138.1	39677.9	57709.7	71211.7	90140.8	102444
310	21919.9	32999.5	37166.5	39809.9	57784.8	71145.6	90243.6	102182
311	22003.4	32920.9	37014.6	39731.4	57886.6	71234.5	90038.5	102259
312	21862.6	33037.4	37188.2	39814	57786	71235	89841.6	102423
313	22034.1	32975	37178.7	39824.8	58009.5	71366.6	90286.8	102248
314	21858	33048	37082.2	39925.7	58013.9	71614.5	90018.6	102614
315	22008.5	33137	37044.4	39856.7	58018.4	71445	90307.9	102495
316	21889.2	33125.4	37092.4	39796.4	58158.2	71759.7	90065.1	102752
317	21891.7	33106.2	36999.4	39864.9	58059.9	71780.5	90292.5	102795
318	21935.7	33191.5	37175.4	39881.6	58072.8	71739.9	90118.9	102545
319	21914	33096.8	37075.5	39859.9	58237.8	71644.3	90312.1	102848
320	21922.5	33033	37061.9	39858.1	58531	71681.9	90409.5	102908
321	21944.6	33124.4	37144.4	39900.6	58185.3	71599.5	90500.2	102606
322	21872.3	33055	37151.6	40049.6	58463.1	71761.7	90665.2	102613
323	21950.7	33114.3	37189	39964.9	58368.7	71831.4	90554.1	102926
324	21900.5	32994	37192.7	39932.1	58508.3	71826.7	90629.5	103030
325	21990.4	33135	37109.9	39930.8	58605	72002.9	90595.9	103025
326	21913.3	33195.3	37210.7	39862.4	58520.2	72021	90725.6	103097
327	21909.4	33131.2	37177.7	40066.1	58652.1	72153.2	90708.6	103043
328	21918.1	33113.8	37339.5	40136.2	58700	72140.4	90949	103060
329	21900.9	33240.9	37256.4	40079.6	58728.2	72061.4	90879.5	103195
330	22014.5	33257.6	37223.8	40079.4	58692.4	72170.7	90787.5	103100
331	21993.9	33043.6	37296.3	40112.8	58834	72407.2	90933.2	103195
332	21941	33204.9	37234.1	40082.6	58795.6	72383.5	91014.2	103348
333	21926.3	33201.9	37408.3	40156.7	58873.2	72434.8	91086.1	103285
334	22047.3	33159.4	37333.1	40019.3	58878.3	72367.3	91175.9	103465
335	21920.4	33164.2	37384.6	40009.9	59049.2	72428.6	91042.4	103517
336	22013.9	33196.6	37330.3	40186.4	58952	72621	91160.5	103386
337	21961.8	33324.5	37477.4	40271.9	58877.4	72552.5	91140.7	103604
338	22014.1	33291.4	37380.9	40162.8	59033.9	72680.8	91245.2	103807
339	21990.9	33286.2	37360.1	40266	58959.8	72606.6	91147	103664
340	21949.7	33298.6	37303.4	40240.2	59123.3	72909.1	91447.7	103599
341	21903.3	33208	37403.4	40262.3	59204.7	72836.8	91230	103635
342	21887.8	33271.6	37351.9	40255	59195.1	72963.2	91270.2	103640
343	22026.8	33319.6	37356.7	40289.5	59312.1	72806.4	91449.5	103747
344	21928.6	33326.9	37458	40373.5	59512.5	72954.4	91429.3	103670
345	21851.3	33312.1	37503.5	40412.2	59308.3	73052.9	91552.4	103832
346	21905.9	33257	37502.9	40142.7	59479.9	73032	91517.5	103894
347	21937.7	33278.1	37506.7	40349.1	59444.2	73134.2	91631.9	103713
348	21990	33220.4	37407.2	40339.3	59537	73217.8	91590.6	103861
349	21887.4	33384	37397.6	40327.8	59519.8	73236.9	91659.9	103713
350	21915.7	33328.3	37546.1	40451	59587.9	73253.2	91645.9	103813
351	21884.2	33258.4	37491.3	40418.9	59450.7	73265.6	91639.9	104032
352	21983.8	33363.2	37456.1	40344.4	59581.4	73257.6	91753.4	103794
353	21934.2	33362.1	37527.4	40379.5	59564.4	73382.6	91657.1	103911
354	21972.6	33359.2	37535.8	40481.1	59670.1	73473.2	91886.6	104259
355	22007.1	33279.1	37579.3	40456.9	59687.8	73482.8	91781.7	104108
356	22002.8	33361.2	37630.2	40566.5	59860.4	73745.1	91783.1	104121
357	21982.6	33370.6	37578.8	40447.4	59779.2	73623.3	91909.2	104191
358	21905.5	33338.1	37476.7	40411	59967.7	73558.4	91874	104419
359	21928.9	33415.7	37540.7	40464.8	59961.8	73609.7	92080.9	104433
360	21989.4	33322.8	37610.1	40663.2	59885.3	73777.1	91965.8	104181
361	21948.2	33422.4	37573.9	40631	59996.9	73876.3	92068.5	104241
362	21928.1	33532.6	37734.8	40552.1	59944.5	73813.7	92114.5	104509
363	21992.9	33408.5	37667.8	40631.7	59915.8	73768.3	92183.9	104299
364	21889.1	33507.4	37562.9	40767.6	60006.1	73889.4	91915.1	104467
365	21871.9	33508.8	37591.5	40693.5	60192	74049.9	92019.4	104527
366	21838.8	33508	37627.6	40761.9	60225.3	74127.1	92196.5	104483
367	22053.8	33369.8	37718.5	40640.9	60273.5	74062.1	92120.7	104699
368	21936.1	33411.4	37581.2	40836.8	60234.8	74334.8	92351.4	104543
369	21903.3	33456.9	37731.5	40745.7	60301.2	74155.6	92182.8	104345
370	21829	33416.4	37617.3	40707.3	60364.3	74225.3	92473.2	104594
371	21946.1	33464.9	37611.9	40795.2	60412.2	74185.3	92253.2	104653
372	21996.9	33602.7	37751.1	40858.9	60224.1	74249.7	92286.9	104730
373	21971.4	33541.6	37640.9	40814.4	60508.5	74301.2	92374.3	104624
374	21886.6	33471.5	37629.8	40765	60280.1	74335.7	92483.3	104772
375	21863.8	33450.5	37653.7	40832.6	60441.7	74505.9	92449.9	104598
376	21985.1	33435	37740.5	40859.3	60585.3	74341.9	92498	104848
377	21992.9	33530.7	37779.4	40944.4	60521.2	74548.6	92701.3	104694
378	22015.6	33603.4	37801.4	40900.4	60474	74609.3	92559.2	104627
379	22010.2	33472.2	37798.7	40810.8	60509.1	74644.9	92801.2	104835
380	21925.4	33559.6	37830.7	40942.4	60684.3	74758.1	92586	104914
381	21896.7	33545.6	37793.8	40947.9	60619.3	74769.8	92656.1	104757
382	21940.2	33556.8	37709.1	41091.3	60746.1	74861.9	92672.6	104703
383	21972.6	33408.9	37765.5	40878.7	60838.8	74789.3	92574.3	104862
384	21892.5	33547.3	37915.2	40920	60787.2	74796.7	92755.6	104979
385	21966.3	33599.5	37856	41029.9	60807.2	74914.8	92620.2	104923
386	21874.2	33617	37730.5	41137.9	60923.7	75124.8	92927.1	104966
387	21897	33646.6	37858.6	41141.9	61008.4	74954.9	92656.8	104949
388	21946.7	33613.9	37731	41137	60997.3	75085.2	92698.5	104848
389	21849.7	33536.3	37901.8	41093.6	61138.8	75154.8	92813	104650
390	21869.5	33688.9	37933.9	41175.6	61012.4	75246.2	93013.1	104869
391	21917.6	33602.3	37780.5	41020.3	61015.9	75223.1	93015.4	104932
392	21837.6	33549.6	37894.8	41055.6	61237.8	75171.7	93018.9	104989
393	21847.7	33579.9	37887.9	41233.2	61254.2	75123.5	93049.4	105085
394	21852.2	33658.1	37853.9	41220.9	61155.9	75205.1	93049	105111
395	21930.3	33605	37917.4	41284	61342.5	75452.7	93328.9	105084
396	21906.8	33641.3	37824.6	41158.4	61206.4	75476.6	93023.6	104882
397	21923.7	33548.5	37863.4	41307.4	61261.4	75320.4	93109.5	105163
398	21954	33744.3	38020.7	41201.1	61215.5	75284.7	93213.5	105122
399	21991.1	33653.4	37784.2	41398.5	61454.1	75387.1	93250.5	104973
400	21925.5	33727.8	37980.5	41341.2	61336	75592.1	93107	105055
401	21912.8	33701.3	37877.4	41252.7	61382	75572.4	93240.5	105138
402	21917.4	33604.6	37856.5	41273.2	61418.2	75494.6	93188.6	105243
403	21827.2	33705.9	37909.8	41332.9	61658.5	75661.7	93096.8	105217
404	21916	33746.1	37944.6	41458.8	61491.7	75702.8	93251.5	105330
405	21933.8	33722.5	37778.4	41392.2	61520.7	75795.2	93279.2	105300
406	21898	33642.8	37998.7	41401.1	61530.4	75688.5	93443.4	105211
407	21949.1	33738.6	38001.2	41418	61616.7	76006.3	93385	105191
408	21928.8	33643.3	37976.1	41344.2	61622.7	75895.9	93354.9	105262
409	21918.6	33724.4	37906.9	41506.1	61764	76048.8	93628.9	105205
410	22004.2	33681.8	38021.7	41464.2	61666.5	76048.1	93443.6	105334
411	21953.8	33658.8	38103.8	41401	61743.1	76128.6	93403.5	105350
412	21900.3	33744.3	38039.4	41543.6	61834.7	75994.4	93579.8	105294
413	21867.5	33691.1	37965.4	41506.7	61742.2	76066.6	93444.5	105310
414	21852.5	33733.8	38008.3	41537.8	61950.9	76113.6	93687.4	105323
415	21893.3	33829.7	37935.1	41641.7	61943.9	76118.1	93449.4	105339
416	21930.9	33767.6	38032.1	41485.8	61949.3	76129.8	93479.9	105472
417	21845.6	33772.2	37967.3	41605.8	62041.3	76177.5	93744	105339
418	21966	33798.2	38075.9	41731.1	62081.2	76293.7	93536.5	105525
419	21835	33930.7	37886.9	41572	62000.9	76126.9	93691.4	105382
420	21917.1	33784.8	38032.7	41640.4	62129.9	76211.7	93868.8	105409
421	21908.8	33819.8	38107.6	41664.1	61990.7	76110.9	93795.4	105477
422	21876.7	33782	38040.7	41715.3	61927.4	76505.8	93504	105573
423	21922	33724.6	37986.9	41788.9	62120.2	76560.2	93701.5	105579
424	21836.4	33829	38021.6	41705.2	62186.7	76293	93809.6	105816
425	22037.5	34033.8	37978.8	41732.9	62252.2	76647.8	93865.6	105497
426	21950.4	33841.9	38041.8	41595.7	62347.5	76504.3	93620.7	105880
427	21870.5	33840.3	38019.4	41674.6	62186.7	76409.7	93808	105696
428	21911.1	33845.8	38067.2	41726.7	62194.6	76803.7	93852.2	105631
429	21965.4	33816.9	38102.5	41900.2	62424.1	76714.7	93878.4	105976
430	21858	33841.3	38206.5	41846.6	62280.1	76634.4	93812.6	105925
431	21971.5	33972.1	38047.2	41909.1	62596.7	76617.7	93788.2	105653
432	21952.4	33962.4	38120.4	41783.5	62311.6	76802.3	94024.6	105887
433	21943.1	33943.2	37988.9	41896.2	62403	76932.7	93833.7	105611
434	21873.5	33943	38036.7	41891.1	62424	76743.1	94185.8	105655
435	21952.7	33897.2	38047.5	41935.9	62506.1	76866.2	94081.7	105811
436	21968.2	33953.4	38132.1	41967.6	62560.2	76773.2	93986.1	105760
437	22038.6	33832.5	38030	41973.6	62524.4	77025.1	94005.2	105723
438	21933.3	33933.8	38042.3	42089.8	62657.3	77082.2	94061.1	105759
439	21797.6	33943.2	38164.2	41906.2	62613.4	76935.9	93985.9	105859
440	21998.7	33929.7	38111.9	42107.4	62726.9	76978.1	94168.1	106005
441	21946.8	33917	38106.5	42185	62690.7	77038.5	94094.9	105806
442	21899.2	33956.3	38089.5	42015.4	62765.1	77130.5	94281.5	105844
443	21972.9	33977.8	38108.5	42148.9	62788.3	77146.7	94239.9	105862
444	21974.9	33920	38236.7	42119.8	62889.3	77223.1	94239	106090
445	21880.9	33993.6	38153.8	42176.7	62986	77041.6	94196.7	105958
446	21887.7	33917.6	38176.6	42207.1	62990.1	77316.6	94128.2	106111
447	21882.7	34086.1	38078.3	42225.6	62964.4	77365.3	94387.9	105923
448	21924.1	33984.6	38116.3	42209.6	62940.5	77401.4	94336.7	105831
449	21910.4	34002.8	38168.3	42322.3	62960.7	77334.5	94159	105833
450	21908.6	34065.3	38029.8	42289.2	62822.3	77391.4	94251.9	105834
451	21899	33948.4	38233.8	42309.7	62933	77235.9	94270.5	105982
452	21840.8	34059.7	38115.3	42351.9	63333.9	77454.3	94379.2	106112
453	21939.4	34063.1	38148.1	42385.1	63183.1	77524.4	94378.5	106193
454	21829.6	34025.7	38116.5	42331.1	63151	77509.2	94433.1	106161
455	21926	33989.5	38114.1	42380	63285.1	77602.7	94417.1	106002
456	21970.7	34054.4	38202.4	42422	63165.6	77551.3	94580.2	106337
457	21882.4	34148.9	38144.4	42473.7	63225.1	77619.6	94455.6	106178
458	21997	34151.2	38178.5	42389.1	63243.9	77598.7	94564.9	106294
459	21964.1	34207.8	38181	42441.3	63326.1	77574.6	94414.6	106103
460	21919.7	34163.4	38230.9	42358.3	63252.2	77661.6	94554.3	106196
461	21821	34125.5	38135.7	42535.5	63416.7	77875.5	94658.4	106131
462	21834.1	34127.3	38282.5	42423.7	63299.1	77765.6	94415.8	106150
463	21854	34011.5	38252.8	42588	63424.9	77927.4	94541.4	106161
464	22050.2	34101.7	38312.2	42561.7	63380.9	77837.1	94663.5	106373
465	21847.5	34132.5	38100.4	42611.4	63466.2	78004.3	94647	106178
466	21828.6	34133.1	38152.1	42631.8	63469.9	77829.4	94443.7	106219
467	21966.4	34009.2	38124.6	42512.8	63608.6	77964.9	94732.8	106309
468	21942.9	34058.2	38319	42508.8	63588.4	77892.7	94733.9	106118
469	21888.8	34165.6	38281.3	42515.1	63573.6	77911.9	94744	106390
470	21880	34245.7	38091.1	42646.1	63483.1	78159.7	94651.5	106481
471	21895.3	34032.7	38093.9	42639.8	63646.9	78015.3	94732.9	106195
472	21820.6	34220.2	38252.9	42683.9	63758.9	78015.1	94599.2	106457
473	21885.1	34171.3	38235.9	42787.1	63427	78178.3	94856	106241
474	21943.8	34221	38189.1	42709.4	63747.5	78194.5	94759	106506
475	21913.6	34158.2	38317.3	42597.7	63639.6	78294.6	94887.4	106625
476	21798.1	34141.4	38240.3	42789.7	63636.3	78440.7	94973.1	106453
477	21846.8	34176	38307.5	42649.5	63739.7	78132.2	94796.8	106401
478	21866.4	34244.6	38369.4	42870.9	63981.6	78278.9	94829.9	106612
479	21841	34274.4	38303.4	42909.8	63908.6	78405.7	95024.6	106525
480	21839.5	34295.8	38362.3	42932.5	63844.2	78299.4	95142.4	106585
481	21891.5	34266.2	38193.8	42919.2	64110.3	78297.4	94952.4	106341
482	21978.3	34235.8	38233.4	42888.2	63909.9	78627.9	94989.4	106386
483	21867.9	34118.7	38343.6	42731.7	64082.9	78530.6	95002.2	106356
484	21957.8	34187.3	38232.2	43038.1	63915.9	78389.8	94986.1	106685
485	21878.7	34152.4	38258.1	42921.7	63882.7	78509	95038.2	106789
486	21931.2	34257.6	38385	42989.5	64156.2	78557.8	94963	106882
487	21830.5	34324.5	38295.9	42999.8	64162.1	78577.3	94924.5	106613
488	21842.2	34323.6	38266	42948.2	64011.8	78596	94812.5	106768
489	21863.3	34276.7	38331.5	43070	64037.2	78791.7	95061.9	106588
490	21895.3	34394.8	38384.1	43087.8	64111	78584.7	95050.8	106713
491	21874.7	34304	38387.5	42955.1	64159.6	78731.2	95091.2	106686
492	21836.9	34236.5	38386.5	42905.8	64263.5	78478.8	95201.2	106492
493	21849.9	34344.2	38330	42964.3	64386.7	78605.4	94996.6	106784
494	21861.3	34233.8	38455.2	42967	64151.2	78692	95243.9	106737
495	22038	34333.4	38319.7	43146.8	64264.8	78806	95221.2	106695
496	21893.3	34282.4	38412.6	43252.4	64342.9	78916.5	95212.4	106541
497	21828.1	34245	38203.1	43144	64492.9	78881.2	95171.9	106542
498	21936.5	34297.4	38312.9	43041.1	64415.5	78792.9	95361.6	106831
499	21936.3	34459.7	38300.1	43331.5	64603.5	78826.1	95151.4	106836
500	21872.3	34377	38397.2	43230.4	64371.2	78816.2	95228.1	106835
501	21886.7	34398.5	38362.6	43185.9	64572	78990.8	95037.3	106995
502	21840.6	34528.1	38389.1	43387.1	64528.3	79172.3	95239.7	106875
503	21867.2	34373.9	38323.5	43251.6	64524.4	79016.2	95308	106810
504	21886	34359	38416.6	43330.7	64604	79083.6	95131.9	106708
505	21855.3	34380.9	38322.6	43360	64602.5	79134.4	95378.6	106988
506	21938.8	34455.1	38478.3	43292	64620.4	78927.9	95414.9	106941
507	21916.6	34299.8	38326.7	43195.3	64767.9	79224.5	95208.5	106746
508	21912.9	34319.9	38280.3	43337.3	64772.8	79189	95452.6	106746
509	21907.4	34526.5	38231.8	43484.5	64716.4	79178.9	95284.5	106869
510	21945.8	34377.9	38432.9	43405.1	64720.1	79179.5	95524.9	107078
511	21857.2	34432.6	38415.4	43474.4	64661	79214.2	95289.1	107110
512	21871.9	34527.8	38474.2	43446.9	64803.4	79201.9	95446.3	107166
513	21822.4	34449.4	38350.6	43355.4	64821.8	79274.4	95242.4	106798
514	21782.5	34457.7	38609.7	43471.6	64725.1	79197.2	95448.5	107201
515	21813.7	34485.8	38493.9	43479.2	64978.6	79394	95464.2	106848
516	21844.6	34359.4	38469.3	43475.7	64899.1	79347.3	95423.3	106958
517	21855	34465.3	38388.8	43567.2	65035.7	79383.2	95669.1	107041
518	21871.7	34419.5	38529	43576.6	64987.6	79411.8	95687.5	106954
519	21980.7	34589.3	38493.9	43673.4	64931.8	79332.6	95415.9	106916
520	22005.4	34490.1	38437.9	43548.1	64879.3	79388.2	95481.3	106959
521	21998.5	34557.2	38457.3	43585.3	64900.2	79534.4	95671.1	107106
522	21922.9	34478.4	38468.2	43716.8	65167.5	79471.8	95782.9	107103
523	21918.7	34614.9	38402.2	43821.7	65054	79436.5	95515.1	107002
524	21921.8	34486.6	38463	43705.6	64955.2	79561.3	95581.2	107131
525	21819.2	34579	38430.6	43758.1	65101.3	79467.7	95683.6	107180
526	21868.8	34658.3	38505.3	43667.7	65143.6	79776.4	95627.2	106989
527	21936.8	34548.4	38502.9	43739.5	65214.6	79516	95692.4	107143
528	21766.7	34644.9	38371.7	43750.6	65154.9	79598.1	95588.4	107135
529	21844.8	34518.1	38413.4	43650.3	65246.6	79685.8	95478.7	107315
530	21845.8	34581.1	38432.3	43782.1	65371.8	79624.9	95848.6	107299
531	21891.5	34578.8	38505	43898.2	65108.7	79817.6	95796.6	107299
532	21950.6	34573.1	38467.2	43779.2	65355.4	79932.3	95660.7	107301
533	21933.5	34570.8	38385.2	43901.6	65405.1	79732.1	95703	107284
534	21865.4	34720.2	38508.4	43822.9	65372.9	79730.5	95728.3	107226
535	21904.2	34675.5	38551.1	43740.6	65394.2	79850.7	95606.4	107133
536	21899.8	34635.9	38625.4	43976.6	65569.1	80041.5	95761.6	107400
537	22021	34768.1	38541.9	44078.6	65521.6	80002.8	95865.4	107534
538	22054	34562.4	38611.1	43992.9	65489.7	80004.3	95759.7	107150
539	21957.6	34716.9	38476.1	44132.6	65641	79913.9	95860.1	107236
540	21909	34677.3	38418.3	44094.1	65661.8	79955.4	95926	107363
541	21903.9	34683.1	38497.5	44015.4	65609.1	79906.9	95805.6	107277
542	21874.7	34729.7	38536.3	44147.5	65493.2	80129.1	95955.8	107329
543	21921.2	34760.4	38554.8	44076.9	65532.6	80124.9	95852.7	107364
544	21876.6	34716.1	38518.2	43972.8	65636.6	79979.1	95984.8	107440
545	21951.8	34700.8	38672.2	44076.2	65714.3	80060	95899.4	107297
546	21823.9	34764.3	38576.6	44063	65608.5	80122.8	95822.4	107321
547	21855.2	34768.6	38485.2	44268.9	65718.4	80070.5	96012	107337
548	21800.3	34834.8	38544.7	44241.3	65571.4	80265.3	95929.2	107409
549	21915.3	34742.9	38625.6	44246.8	65756.7	80197.1	96012.1	107430
550	21863.7	34860.1	38493.2	44145.4	65756.1	80235.1	96077.4	107467
551	21951.3	34744.8	38632.7	44345.6	65770.3	80222.9	96195.5	107527
552	21883.7	34742	38496.6	44183.1	65750	80114.7	96048.1	107446
553	21800.8	34799.4	38352.6	44326.9	65875.1	80145	96143.1	107662
554	21869.3	34777.2	38572.4	44289.4	65794.8	80318.1	96103.3	107513
555	21831.4	34771.8	38649.4	44466.9	65995	80165.3	96033.9	107648
556	21910	34787.1	38457.9	44388.7	65885.5	80285.7	96030.5	107612
557	21880.5	34871	38567	44277.7	66022.3	80471.2	96145.4	107532
558	21889	34784.1	38690.1	44376.1	65888.3	80390.4	96296.2	107423
559	21916.9	34810.4	38578.8	44642.5	66021.3	80323.5	96245.2	107803
560	21926.4	34859.7	38492	44323.5	66135.7	80304.6	96424.9	107511
561	21830.4	34856.5	38628.9	44357.4	66055.3	80482.4	96189.3	107679
562	21813.2	34852	38449.7	44551.5	66035.4	80332.5	96323.9	107833
563	21868.6	34809.4	38622.1	44428.6	66025.9	80653.6	96359	107710
564	21893.3	34756.2	38558.1	44654.7	66156.3	80351.7	96089.1	107670
565	21830.1	34830.3	38569.6	44583.3	65932.9	80403.1	96382	107558
566	21898	34857.2	38589.9	44670.5	66176.9	80484.3	96270.6	107667
567	21905.4	34973.4	38658.3	44558.7	66180.5	80550.9	96393.7	107543
568	21868.2	34917.1	38569.1	44670.8	66288.2	80467.1	96441	107593
569	21945.1	34995.4	38558	44621.3	66051.2	80394.5	96306	107563
570	21886	34998.9	38590.5	44736.9	66288	80385.5	96582.1	107502
571	21956.7	34930.1	38635.4	44598.6	66216.8	80772.1	96420.3	107788
572	21826	34966.7	38528.9	44697.7	66464.5	80656.6	96464.3	107337
573	21854.2	34939.9	38631.6	44658.4	66388.9	80752.3	96422.6	107664
574	21881.5	35135.6	38553.5	44812.7	66350.5	80592.4	96264.5	107700
575	21902.2	34977.5	38511.8	44819.6	66396.8	80626.1	96384.7	107679
576	21835.2	34867.4	38650	44790.7	66540.7	80757.1	96384.6	107757
577	21829	34911.7	38646.2	44784.9	66237	80666.8	96185.1	107769
578	21892.3	35047.6	38702.4	44732.2	66544.7	80753.4	96417.4	107631
579	21892	34934.3	38693.1	44895	66536.6	80693.5	96499.6	107672
580	21767.5	34995.2	38706.4	44867.5	66485.6	80856.3	96654.5	107528
581	21913	35037.6	38625.5	44779.2	66488.8	80970.4	96473.5	107855
582	21872.2	35119.1	38612.8	44927.4	66569.7	80804	96499.4	107840
583	21902.1	35001.3	38679.6	44916.4	66557.4	81038.6	96686.1	107900
584	21845.6	35103.9	38638.2	44939.6	66401.7	80825.8	96556.7	107842
585	21906.1	35047.2	38507.3	44862.1	66436.6	80760	96782.9	107930
586	21941.7	35023.8	38696.4	44998.1	66569.2	80919.9	96525.9	107750
587	21813.7	34985.8	38587.7	44976.4	66735.2	80904.2	96654.1	107839
588	21829.3	35006.2	38671.8	45012.9	66621.2	80951.6	96710.6	107667
589	21877.4	35018.4	38746.8	45039.8	66573.5	80983.7	96694.2	107878
590	21896.3	35045.5	38726.9	45046	66631.6	81065.5	96654.3	107670
591	21950.5	35100.9	38719.7	45131	66813.1	81082.3	96619.8	107733
592	21959.6	35138.3	38742	45120.2	66838	81098.6	96740.6	107918
593	21850.4	35112.4	38583.1	45246.9	66801.7	81241.9	96570.4	107865
594	21881.1	35073.4	38637.9	45234.5	66931.1	81012.4	96788.6	107843
595	21879.6	35185.1	38672	45192.3	66895.7	81196.9	96758.9	107741
596	21912.9	35117.4	38619.1	45167	66788.8	81279	96565.8	107909
597	21900	35179.7	38689.8	45175.2	66791.1	81206.9	96851.1	107690
598	21908.8	35164.1	38589.6	45308.5	66775.7	81292.8	96848.3	107737
599	21890.8	35208.4	38693.8	45346.4	66906.9	81153.4	96802.3	107945
600	21876.8	35206.8	38744.1	45323	66947	81025.6	96580.9	107943

## Sheet: Sheet2
Time(s)	0mM	0.13mM	0.26mM	0.52mM	1.04mM	2.08mM	4.1mM	8.3mM
0	22325.7	21880.1	20369.3	20279.5	24776.4	28923	32023.3	33503.4
1	22378.2	22027.7	20488.6	20420.2	25168.6	29390.9	32448.5	33933.2
2	22327.6	22166.3	20459.3	20528	25549.1	29814.2	32982.8	34531.5
3	22426.5	22218.5	20590.8	20711.4	26020.9	30215.2	33563.6	35108.4
4	22367.9	22397.7	20689.7	20804.8	26419.5	30674.6	33990.8	35459.9
5	22411.2	22559.6	20834.9	21059.7	26856.2	31035.1	34435	35911.2
6	22358	22548.6	20803.4	21217.2	27156.1	31410.8	34831.4	36388.7
7	22383.4	22707	20918.5	21503.7	27643.2	31743.3	35239	36765.1
8	22306	22786.3	21044.8	21510.9	28033.1	32221.2	35752.9	37240.6
9	22269	22928.8	21219.1	21729.5	28335.1	32538.8	36191.2	37834.8
10	22162.5	22948.9	21324.3	21925	28784.4	32798.5	36708.8	38148.4
11	22249.1	23037	21311.8	22071.8	29097.1	33180	37185.7	38497.8
12	22326.8	23053.2	21472.8	22227	29531.1	33463.2	37638.2	38821.8
13	22169.2	23245.4	21568.2	22477.7	29795.1	33680.7	38244.4	39300.9
14	22201.1	23373.4	21608.7	22688.2	30109.8	34125.4	38713.1	39705.8
15	22234.3	23281.1	21741.7	22921.9	30363.3	34412.8	39138.1	40093.2
16	22273	23480.9	21786.6	23021.8	30750.1	34521.4	39639.1	40755.8
17	22257	23578.3	22012.1	23155.7	31283.3	34922.5	40318.9	41034.1
18	22185.7	23653	22020.6	23364.4	31431.3	35285.1	40893.8	41514.3
19	22169.7	23638	22055.6	23590.6	31774.9	35499.5	41380.2	42114.2
20	22357.7	23794.3	22404.9	23718.1	32022.9	35778.8	42115.5	42503.8
21	22216.4	23922.7	22360.7	23999.3	32415.5	36051.7	42494.2	43079.5
22	22365.4	24026.8	22393	24147.9	32698.2	36454.8	43084.7	43563.4
23	22313.3	23953.2	22541.3	24342.3	33012.9	36682	43803.4	44018.9
24	22359	24140.2	22677.7	24589.9	33252.8	36915.2	44391.1	44602.6
25	22230.9	24212.9	22717.9	24690	33528.9	37221.1	44898.4	45181.8
26	22316.4	24277.3	22896.7	24940	33758	37352.7	45398.4	45681.7
27	22278.5	24373.9	22898.5	25061.6	34107	37742.6	45975.3	46310.1
28	22107.6	24379.9	23100	25286.2	34430.2	37991.7	46358.8	46988.1
29	22152	24377.6	23175.7	25447.2	34615.2	38268.7	46800.1	47718
30	22188.8	24580.2	23168.7	25693.2	34912.6	38429.7	47442.5	48428.1
31	22038.7	24636.7	23377.3	25840	35080.5	38741.2	47699.1	49179.2
32	22232.5	24712.9	23386.2	26024.8	35454.7	39088.5	48148.4	50026
33	22132.8	24831.5	23521.5	26220.4	35670.2	39217.2	48597.2	50609.5
34	22042.6	24900.7	23675.2	26410.1	35798.4	39549.9	49203.6	51520
35	22156.9	24866.4	23789.8	26568.6	36059	39633.6	49473.4	52174.9
36	22124.6	24937.8	23735.2	26785.1	36204.1	39957.7	50104.3	53140.7
37	22097.6	25067.3	23940.1	26930.9	36423	40114.4	50340	53887.3
38	22171	25088.3	23929.2	27161.6	36577.2	40426.6	50778.2	54487.8
39	22201.6	25105.2	24127.3	27306.3	36853.4	40666.2	51192.8	55293.2
40	22120.3	25164.6	24177.9	27464.3	36953.7	40952.6	51587.2	55979.8
41	22172	25326.5	24303.7	27737.2	37148.4	41117.9	52069.8	56790.2
42	22106.1	25313.8	24392.8	27915.1	37450.7	41455.6	52369.4	57302.7
43	22117.5	25355.1	24545.2	28089.4	37564.4	41635	52784.7	57944.9
44	22120.9	25493.2	24577.4	28125.2	37802	41824.1	53091.9	58483.3
45	22111.3	25477.8	24678.7	28357.2	37844.3	42137.5	53430.6	59020.2
46	22085.7	25612.5	24812.9	28494.7	38062.2	42367.7	53933.8	59626.7
47	21953.6	25694.9	24997.6	28757.1	38151.8	42451	54204.8	60263.5
48	22056	25689.6	24925.7	28764.1	38283.4	42637.7	54628.4	60695.7
49	22089.7	25809.9	25217.6	28858.7	38423.8	42711.2	55021.2	61046.3
50	22063.7	25728.5	25130.6	29094.6	38447.1	43150.8	55203.1	61525.4
51	22010.6	25862.5	25330.3	29254.2	38702.7	43246.4	55632.9	62144.2
52	22049.6	25986.9	25472.2	29459.4	38890.4	43541.8	55942.6	62420.8
53	22015.6	26027.7	25527.4	29544.3	38923.6	43813.4	56257.6	62970.2
54	21971.4	26141	25574	29624.8	39050.2	44039.8	56563.2	63284.4
55	22046.8	26098.9	25712.2	29811	39180.6	44159.2	57001.2	63732.8
56	22016.3	26075.1	25853.8	30051.8	39198.9	44378.3	57250.4	64198
57	21896.8	26234.2	25965.2	30140.9	39257.6	44621	57559.9	64664.4
58	21965.3	26170.4	25973.7	30225.9	39481.9	44740.4	58011.9	65257.1
59	21882.4	26334.8	26078.9	30410.3	39430.8	44933.8	58269.2	65425.3
60	22032.4	26445.1	26000.6	30623.9	39668.7	45076.5	58432.2	65774.4
61	21834.6	26322.7	26424.9	30663.1	39634.1	45252.3	58572.5	66279.1
62	21996.4	26534	26367.9	30912.7	39768.7	45530.2	59027.5	66509.8
63	22003.6	26550.6	26574.7	30899.9	39983.6	45777.2	59189.1	66927.8
64	22057.4	26642.9	26552.3	30991.6	40210.8	45997.6	59448.5	67244.9
65	21987.7	26624.9	26679.2	31204.2	40184.2	46226.2	59844.9	67612
66	21990.9	26756.3	26662.1	31347.9	40203.6	46457.5	59998.9	67906.5
67	21924.4	26747.3	26758.1	31457	40378.3	46678.3	60372.5	68289.2
68	22119.7	26871.7	26995.8	31547.6	40397.4	46851.5	60628.4	68745.7
69	22024.3	26868.3	27022.5	31698.1	40371.5	47022.1	60876.1	68897.1
70	22042.7	26783.1	27043.6	31854.2	40621.7	47208.2	61149.9	69407.2
71	21915.6	26940.8	27304.9	31911.5	40517.3	47456.9	61331.2	69809.9
72	21983.3	27021.7	27319.1	32175	40728.2	47660.3	61564.6	70049.3
73	22030.3	27042.9	27401.4	32171.5	40958.3	47977	61813.7	70424.4
74	21966.6	26993.6	27345	32205.5	41026.6	48068	62059	70675.9
75	21904.5	27152.3	27565.6	32515.4	41103.7	48289.8	62177.9	70992.1
76	22087.9	27107	27690.4	32585.4	40980.8	48407.5	62725.1	71521.2
77	21974.6	27253.4	27687.9	32584.7	41295.8	48652.5	63018	71852.5
78	21879.4	27187.2	27862	32689.8	41178.6	48884.5	63330.4	71943.9
79	21941	27230.4	27916.9	32798.6	41402.8	49067.4	63560.6	72517.7
80	22003.7	27425.6	27972.5	32941.9	41319.9	49357.7	63832.8	72602
81	21998	27383.9	28101.3	33161.2	41427.7	49498.1	63998.9	72915.1
82	21985.1	27391.3	28172.1	33214	41675.3	49693.8	63992.2	73413
83	22018.1	27486.5	28167.4	33328.8	41594.5	49948.2	64442.2	73602.7
84	22040.4	27583.1	28380.4	33316.4	41749.3	50107.7	64708.1	74039.1
85	22004.4	27560.1	28413.5	33364.6	41859.1	50322.9	64979.8	74186.2
86	21964.8	27641	28475.8	33580.2	41804.6	50409.2	65296.6	74751.3
87	21932.8	27751.9	28392.7	33607.9	42088.7	50635.4	65343.3	75147.8
88	21999.3	27748.7	28606	33701.3	42196	50736.1	65681.1	75315
89	21982.6	27735.4	28650.5	33740.8	42200.6	51134.4	65890.1	75809.3
90	21902.6	27780	28824.8	33871.5	42309.9	51144.6	66166.1	76016.3
91	21926.7	27857.1	28882.5	33953	42337.6	51311.7	66330	76316.8
92	21995.3	27796.7	28849.1	34069.1	42500.5	51475.8	66568.2	76559.8
93	22019.6	28018.8	29009	34239.9	42511.6	51517	66832.5	77001.4
94	22001.7	28015.4	29152	34230.8	42512.8	51733.6	66877.3	77435.4
95	21976.5	28015.7	29218.9	34408.4	42614.4	51878.4	67148.2	77622.4
96	21955.2	28109.2	29268.7	34424.6	42862.5	52140	67388.1	77756.6
97	21987.5	28234.5	29291.4	34404.8	42760.8	52156.9	67610.3	78441.2
98	21869.5	28220.2	29419.2	34475.4	43032.7	52393.9	67793.6	78329.7
99	21912.2	28166.3	29492.5	34655.3	43080.1	52626.1	67968.8	78645.9
100	21934.7	28253.4	29452.6	34620.6	43024	52807.2	68252.2	78862
101	21977.8	28332.9	29621.9	34681.9	43188.1	52957.2	68178.4	79240.9
102	21960.3	28301.8	29591.6	34767.2	43285.7	53245.7	68537.6	79614.5
103	21979.7	28396.4	29793.7	34783.5	43460	53109.2	68655.2	79639.7
104	21934.3	28468.2	29718.6	34927.3	43432	53269.8	68654.6	80204.3
105	21891.4	28431.5	29898.5	35012.2	43484.8	53528.1	69122.4	80181.1
106	21990.4	28581.7	29997.1	34946.6	43666.1	53579.5	69333.9	80374.5
107	21977.1	28578.7	30023	35070.3	43718.9	53865.3	69280.2	80816.9
108	22031	28487.7	30050	35166.5	43716.8	53926.5	69733.8	80995.5
109	21932.2	28676.9	30079.7	35193.3	43836.3	54082.6	69927.6	81113.9
110	21940.7	28707.9	30254.3	35230.1	43886.9	54371.1	70042.8	81401.9
111	21935.6	28732.7	30319.8	35416.2	44093.2	54461.9	70263.5	81861.7
112	21917.1	28774.8	30320.2	35408.8	44047.9	54636	70179.4	82010
113	21971.2	28798.8	30420	35522.7	44058.4	54909.5	70461.5	82121.6
114	21992.3	28893.2	30396.7	35610.8	44284.2	54881.8	70767.7	82382.3
115	21971	28908.7	30613.4	35544.2	44425.7	55039.9	70733.5	82626.2
116	21872.8	29029.5	30523.1	35557.9	44390.4	55093.4	70958.6	82596.3
117	22042.7	28936.9	30737.3	35621.2	44437.9	55267	71261.2	83262.6
118	21972.7	28947.1	30639.7	35764.6	44626.9	55350.9	71557	83170.3
119	21939.9	29046.8	30888.2	35751.8	44661.1	55455.9	71486.2	83512.8
120	22057.9	29144	30872.4	35861.1	44958.3	55720.9	71848.7	83746.9
121	21975.3	29068	30985	35862.5	44883.4	55860.1	71841.2	83737.6
122	21958.1	29193.5	30939.7	35825.4	45087.4	56047.6	72043.5	84029.2
123	22027.3	29206.5	31051.5	35961.8	45186.1	56067.9	72245.4	84393.7
124	21892.1	29270.2	31146.7	35946.8	45176.2	56241.1	72308.6	84514
125	22023.4	29286.5	31206.6	36029.6	45142.5	56331.5	72444.4	84749
126	21933.3	29333.3	31127.5	36044.7	45286.1	56348	72790.6	84692.9
127	22013.6	29352.4	31262.7	36146.5	45497	56600.7	72878.4	84999.6
128	21955.7	29414.2	31352.4	36119.9	45458.7	56629	72994.1	85406.2
129	21924.1	29395.3	31399.4	36221.6	45568	56844.1	72847.1	85761.6
130	22024.1	29483.8	31522.6	36199.5	45743.8	57099	73159.7	85806.6
131	22024.9	29498.1	31579	36276.7	45772	57082.6	73514.5	85966.9
132	22010.6	29505.9	31533.1	36261.1	45825.1	57117.3	73773	86235
133	22040.4	29554.9	31622.5	36373.3	46008.1	57291.2	73925.8	86435.8
134	21979.9	29725.6	31652.9	36382.2	46044.6	57554	74151.1	86821.3
135	21963.9	29678	31735.3	36447.3	46123.2	57662.1	74078.2	86851.2
136	22091.6	29742.8	31716.7	36434.3	46214.6	57618.7	74399.7	87057
137	22027.9	29665.5	31965.6	36412.9	46273.7	57717.4	74349.4	87333.3
138	21965.6	29694	31990.3	36594	46376.1	57808.9	74519.6	87490.3
139	21971.7	29805.6	31960.1	36468.6	46521.9	58010.6	74864.4	87873
140	21967.8	29877.5	32108.6	36656.9	46398.9	58187.1	74797.5	87937.3
141	21974.3	29822.6	32033.7	36763.6	46687.1	58186.9	75195.4	87855.1
142	22026.5	29895.7	31976.4	36620.5	46721.9	58231.3	75366.7	88248.9
143	21994.9	29936.4	32072.3	36658.5	46839	58533	75487.1	88605.4
144	21865.2	29951.2	32151	36850.3	46853.5	58664.6	75538.6	88608.6
145	21943.3	30012.6	32281	36788	46895.1	58609.9	75717.7	88827.1
146	22047.3	30069.2	32276.6	36770.5	46859.1	58757.3	76133.2	88981.8
147	21906.6	30065.4	32332.4	36724.5	47022.2	58951.9	76152.5	89239.6
148	21970.9	29967.4	32413.8	36796.7	47188.2	59119.7	76150.9	89630.2
149	21930.1	30291.9	32412.7	37054	47202.6	59111.2	76286.6	89610.4
150	21959	30096.8	32444.3	36973.4	47410.1	59423.8	76447.8	89827.3
151	22048.7	30272.6	32644.5	36997.1	47548.9	59403.1	76618.2	89858.6
152	21906.9	30177.5	32501.7	36965.7	47695.4	59441.5	76850.7	90125.9
153	21903.5	30147.8	32712.8	37030.4	47656.2	59582.9	76918.1	90236.3
154	21889	30270.6	32718.4	37094.3	47683.8	59620.1	77050.2	90487.9
155	21956	30241.1	32756.3	37066.6	47723.5	59852.9	77296.7	90599.9
156	21949.3	30312.5	32724	37120.3	47956.2	59935.5	77161.2	90793.1
157	21966.5	30420.7	32837	37048.5	48027.1	60033.3	77637.4	91144.1
158	21899	30410.6	32894.1	37154.2	48139.5	59984.6	77587.8	91076.7
159	21992.3	30382.2	32953.2	37305.7	48263.9	59979.8	77693.8	91288.3
160	21977	30406.1	33001.5	37210.2	48311.3	60157.1	77970.7	91455.2
161	21997.8	30512.7	33045	37307	48396.6	60403.5	78049.1	91600.5
162	21961.9	30551.3	33129.7	37219	48444.2	60491.7	78138.2	91778.1
163	22104.3	30607.6	33066.9	37218.1	48541.9	60436.3	78220.9	92131.6
164	22000.4	30581.2	33075.3	37414.8	48612.8	60673.8	78332.9	92122.9
165	21949.2	30656.3	33242.9	37416.2	48624	60658.6	78695.1	92180.3
166	22062	30778.5	33274.7	37371.6	48626.9	60908.6	78686.2	92385.8
167	21987.2	30681.5	33270.3	37465.3	48772	60933.2	78697.1	92612.8
168	21930.1	30673	33321.6	37492.9	48844.6	60895.9	78890.3	92817.5
169	21990.5	30765.5	33476.4	37471.2	48970.4	61184.8	79010.6	92798.9
170	21933.5	30799.6	33430.2	37523	49046.9	61123.5	79105.5	92971.9
171	22002.5	30660.5	33436	37410.5	49173	61220.5	79266	93041.2
172	21930.8	30899.2	33529	37574.7	49380.7	61263.3	79288.4	93138.6
173	21979	30816.6	33586.4	37535.9	49352	61563.4	79362.8	93386.5
174	22009.7	30904.7	33540	37475.9	49486.2	61621.9	79649.3	93541.4
175	22009.8	30973.9	33568.4	37615.3	49449.8	61627.8	79665.3	93611.4
176	22005.5	30846.3	33787.1	37676.6	49581.1	61895.4	79750.9	93569.8
177	21913.3	30953.5	33753.8	37613.5	49684.9	61801.1	80076.8	93514.6
178	21973.4	31019.3	33725.4	37530.7	49833.8	61840.8	80000.3	93749
179	21930.3	31051	33850.7	37632.4	49749.8	62101.8	80075.9	93846.8
180	21920	31000.6	33770.4	37617.2	49827.3	62002.8	80407.9	93816.3
181	21919.5	31122.6	33824.6	37728.4	49925.3	62194.5	80550.3	94099.8
182	21978.2	31117.5	33938	37725.3	49986.3	62236.5	80666.1	94185
183	22006.9	31113.1	33958.9	37669.1	50010.3	62459.3	80705.1	94328.9
184	21963.2	31081.1	33943	37844.6	50286.7	62471.4	80796.9	94394
185	22026.4	31148.2	33928.8	37771	50222.6	62450.6	80909.8	94729.1
186	21963.9	31217.9	34039.6	37672	50441.3	62525.3	81034	94797.8
187	21972.7	31212.9	34126.2	37802.7	50337	62586.1	81297.2	94629.8
188	22001.7	31202.1	34144.4	37888.1	50412.9	62921.3	81135.2	94658.7
189	22049.6	31264.7	34112.4	37857.3	50547.2	62734.9	81346.1	94986.7
190	22027.5	31246.1	34266.6	37935.1	50766.1	62989.2	81551.5	95059.5
191	21955.7	31427.2	34216.2	37872.8	50757	63094.8	81504.5	95202.6
192	22017.5	31332.2	34278.1	37897.9	50761.5	63072.4	81595	95115.5
193	21950.3	31330.6	34445.4	37937.6	50793.3	63187.1	81831.9	95452.1
194	21965.1	31311.6	34392.3	37860.1	51119.5	63226.7	81934.9	95376.1
195	21979.2	31421.3	34352	37974.3	51153.9	63206.9	81965	95584.6
196	21963.4	31462.4	34374.9	38121.8	51183.9	63409.8	82166.8	95560.3
197	21966.4	31450.2	34349.3	38125.9	51291.9	63433.9	82174.4	95472.5
198	22002.2	31427.1	34405.7	37950.8	51305.1	63494.1	82397	95764.6
199	21991.3	31551.5	34563.7	38057.4	51305.1	63619.7	82211.7	95881.4
200	21915.3	31477.1	34584	38035.2	51409	63664.6	82645	95958.2
201	21983.6	31592.6	34530.2	38080.6	51547	63795.2	82790.4	96037.4
202	22007.2	31567.5	34665.6	38016.1	51622	64014.7	82769.5	95953.4
203	21909.8	31476.8	34635	38054.6	51598.2	63937.2	82836.7	96159.8
204	21956.4	31586.3	34751.4	38148.6	51655.6	64111.3	82885.7	96093.7
205	21953.2	31604	34746.6	38219.3	51697.4	64235.9	83070.3	96324.9
206	21984	31606.6	34760.9	38256	51888.3	64150.5	83173.6	96261.1
207	21993.2	31719	34680.2	38177.9	51894.1	64272.6	83289.4	96206.2
208	21998.4	31600.5	34810.7	38187.3	52111.6	64471.2	83332.2	96327.7
209	21887.3	31781.3	34750.8	38170.8	51944.1	64613.1	83367	96558.6
210	22013.7	31655.4	34878	38288.1	52152.3	64510.4	83704.6	96713.3
211	21917.2	31782.8	34834	38179.3	52118.1	64623.8	83748.6	96529.8
212	21961.9	31710.4	34893.6	38285.4	52407.7	64724.7	83737.8	96793
213	21954.6	31717.4	35003.5	38375.4	52413.7	64890.1	83854.7	96840.9
214	22032.9	31799.7	34995.7	38389.9	52437.4	64877.9	83889.1	96769.1
215	22003.4	31789.1	34953.4	38246.3	52309	65066.5	83946.3	97011.8
216	22036.4	31883.3	34972.6	38363	52481.5	65163.8	84122	96923.7
217	21898.6	31903.9	35097.3	38298.6	52660.6	65076.6	84276.8	96968.8
218	21880.3	31982.9	34940.2	38180.2	52802	65315	84444.8	97127.3
219	21967.4	31757.2	35194.3	38384.5	52733.8	65416.5	84409.1	97194.7
220	21895.2	31879.8	35150.7	38266	52858.2	65338.4	84492.8	97262.2
221	21996.4	31946.8	35111.2	38395.4	52941.4	65386.6	84668.4	97287.7
222	22069.1	31894.6	35245.7	38305	52949.8	65504.4	84716	97299.6
223	21948.2	31994.7	35270.2	38326.8	53096.4	65792.9	84731.7	97398.9
224	22000.9	31927.1	35312.3	38383.7	53192.1	65800.2	84936.2	97539.4
225	21933.8	32103.5	35308.4	38316.7	53256.8	65734.3	84726.9	97636.6
226	21976.2	31928.6	35309	38404	53126.6	65964	85031.3	97537.1
227	21982.5	32048	35399.6	38548.7	53371.2	65984.9	85019.3	97978.9
228	21934.1	32031.7	35472.9	38541.9	53504.4	66066.8	85153.3	97920.6
229	21950.3	32055.1	35379.6	38523.3	53430.7	66185	85080.9	97806.9
230	21996.5	32024.4	35506.5	38582.9	53505.3	66091.4	85077.2	97815.2
231	21982.7	32015.2	35409.5	38639.4	53577.9	66255.5	85360.7	97905.6
232	21965	32165.2	35390.4	38631.7	53614.1	66326.3	85274.6	97986.4
233	21982.9	32049.7	35292.4	38518	53651	66529.4	85350.5	97885.8
234	21929.4	32110.9	35609.7	38588.2	53823.1	66557.5	85425.5	98037.3
235	21896.3	32102	35516.2	38631.7	53836.1	66483.7	85535.4	98117.2
236	21904.9	32126	35511.2	38658.1	53899.1	66746.4	85781.5	98326
237	21972.3	32157.6	35761.1	38635.9	53980.2	66676	85684.9	98477.7
238	22015.3	32178.2	35687.5	38703.4	54073.9	66867.4	85968.8	98484.6
239	21919.7	32186.8	35667.5	38654.7	54180.1	66863.8	86022.4	98633.2
240	21961.8	32227.3	35662.3	38757.3	54257.4	66991.6	86041.9	98505
241	21996.7	32194.8	35755.3	38712.6	54226.1	67138	86154.9	98606.2
242	22011	32205.4	35820	38747.9	54507.8	67158.3	86168.1	98738
243	21988.6	32386.2	35721.1	38633	54402.6	66993.2	86101.7	98743.3
244	21853.1	32295.3	35751.8	38770.9	54358	67160.6	86327.6	98887.8
245	21951.9	32237.3	35718.8	38845.6	54530.8	67220.1	86543.9	98874.6
246	21893.7	32321.3	35733.3	38792.1	54576.8	67441.1	86431.6	99084.1
247	22103.2	32319	35884.6	38898.3	54740.6	67498.8	86248.8	99298.9
248	21942.5	32392.7	35930.4	38891.1	54734.2	67570.4	86558.6	98992.1
249	22032.8	32305.6	35807.1	38837.8	54710.9	67763.8	86587.2	99253.4
250	21946.5	32420.2	36000.8	38923.5	54660.9	67650.1	86575.9	99193.6
251	21964.9	32294.9	35972.9	38819.6	54854.1	67793.4	86610.6	99584.4
252	21939.7	32539.5	36023.9	38860	54923.2	67764.4	86946.7	99361.4
253	21966.8	32366	35959.6	38939.5	54971.3	67792.6	86940.6	99542.3
254	22009.2	32344.4	36079.6	38904.5	55036.8	67957.6	86941.9	99688.8
255	22007.8	32409.4	35991.1	38887	55061.6	67920	86886	99544.3
256	21961.2	32409.3	35966.2	38979.6	55112.5	68003.9	86899.2	99669
257	21953.6	32557.1	36100.2	38951.8	55126.5	68107	86963.8	99729.7
258	21952.9	32428.1	36145.8	38874	55266.5	68212.7	86930.1	99850.1
259	21970	32532.9	36034.4	38975.2	55378.6	68258.7	87088	99933.6
260	21924.1	32567.9	36227	38976.6	55500.3	68415.1	87276.2	99913.6
261	22001.5	32437.9	36121.9	39113.8	55380.8	68404.1	87293.4	100005
262	21902.5	32570.6	36200.5	38996.9	55619.2	68363.5	87331.3	99965.4
263	22001.3	32557.6	36174.2	39023.7	55643.6	68573.4	87237.1	100109
264	22012.8	32552.6	36278.6	38988.1	55667.2	68370.2	87481.2	100102
265	22067.3	32539.1	36231.5	39033.7	55552.2	68756.4	87579.8	100187
266	22013.1	32414.7	36379	39033.7	55645.5	68604.3	87566.9	100356
267	21991.3	32703.9	36205.8	39203.7	55766.2	68738.5	87542.6	100460
268	21938.5	32625.2	36323.7	39125.6	55796.1	68841.7	87654.1	100574
269	21975.9	32546.9	36280.8	39069.7	55915.6	68892.9	87737.9	100540
270	22028.3	32508.9	36332.1	39177.5	55880.6	68973.7	87978.4	100442
271	22017.6	32603.3	36405.4	39176.1	55963.4	69066.2	87798.3	100443
272	21927.8	32659.8	36434.6	39160.8	56071.2	68942.2	87862.9	100556
273	21994.4	32746.3	36332.5	39038.6	56107.4	69166.3	88079.6	100666
274	21978.3	32651.9	36406.4	39299.3	56023	69319.4	87886.7	100722
275	21968.8	32864.2	36479.9	39184.8	56068.9	69305.8	88084.2	100719
276	21971.9	32586	36390.7	39117.7	56276.6	69238.7	88198.4	100844
277	21931.9	32760	36476.8	39279.5	56374.6	69507	88345.1	100924
278	21903.7	32838.2	36467.1	39310.3	56271.1	69449.8	88322.8	100997
279	21934.1	32639	36474.5	39320.3	56347.5	69556.2	88351.8	100986
280	21920.3	32778.5	36548.8	39324.9	56517.4	69586.7	88334.4	101071
281	21994.5	32787	36676.2	39297.4	56407.3	69563.2	88543.9	101030
282	21879.2	32801.2	36595.1	39269.8	56410.3	69688.9	88549.9	101076
283	21896.2	32848.1	36549	39261.5	56567.9	69738.9	88604	101352
284	22009.3	32692.8	36605.1	39330.2	56678.1	69692.6	88511.5	101414
285	22027.2	32704.9	36618.2	39357.4	56743.7	69727.3	88650.8	101342
286	21952.7	32823.5	36570.8	39373.1	56758.2	69975.6	88810.1	101443
287	22028.3	32733.8	36604.9	39471.2	56780.9	70005.5	89010.8	101283
288	21882.2	32740.7	36629.4	39447.5	56792.2	69851.6	88977.3	101476
289	21892.9	32865.5	36698.6	39504.2	56880.9	70051.3	88798.5	101330
290	21999.6	32852.3	36657.6	39424.9	56898.2	69953.8	88882.7	101487
291	21949.4	32851.9	36737.9	39424.6	57069.4	70120	88911.9	101576
292	21932.4	32791.8	36783.5	39569	56952.1	70389.4	89135.4	101689
293	21968.9	32831.3	36851.4	39581.1	57031	70315.9	89130.1	101747
294	21970.5	32878.4	36858	39628.5	57143.2	70199.5	89406.5	101839
295	21941.1	32875.6	36771.7	39525.6	57302.4	70373.9	89301.3	101926
296	21857.4	32987.9	36894.4	39531.5	57231.4	70454.7	89313.8	101689
297	22016.8	32889.5	36769.1	39634.8	57333.4	70673.1	89461.7	101959
298	21913.4	32810.6	36823.4	39584.5	57304.8	70632.6	89478.8	101998
299	21985.2	32923.3	36882.3	39614.4	57470.8	70609.7	89485.1	101930
300	21969.2	32892.4	36858.6	39598.4	57359.3	70579.7	89481.1	101924
301	21957.9	32925.1	36838	39719.4	57433.6	70538	89484.6	101864
302	21908.4	32965.2	37052.2	39635.6	57415.6	70722.3	89689	101802
303	21944.3	33038.2	37026.7	39630.8	57543.8	70675.3	89719.1	102131
304	21957.4	33086.9	36919.1	39603	57564.5	70910.9	89743.9	102084
305	21928.2	32874.2	36997	39621.6	57644.2	70845.7	89700.7	102136
306	21977.9	32857.2	37063.9	39750.1	57678.1	70924.9	89954.5	102004
307	21967.6	32984.5	36970.6	39602.8	57834.8	71017.5	89875	102190
308	21896.1	33046.1	37071.7	39771.5	57766.4	71081.5	89900.7	102182
309	22010.2	33060.4	37138.1	39677.9	57709.7	71211.7	90140.8	102444
310	21919.9	32999.5	37166.5	39809.9	57784.8	71145.6	90243.6	102182
311	22003.4	32920.9	37014.6	39731.4	57886.6	71234.5	90038.5	102259
312	21862.6	33037.4	37188.2	39814	57786	71235	89841.6	102423
313	22034.1	32975	37178.7	39824.8	58009.5	71366.6	90286.8	102248
314	21858	33048	37082.2	39925.7	58013.9	71614.5	90018.6	102614
315	22008.5	33137	37044.4	39856.7	58018.4	71445	90307.9	102495
316	21889.2	33125.4	37092.4	39796.4	58158.2	71759.7	90065.1	102752
317	21891.7	33106.2	36999.4	39864.9	58059.9	71780.5	90292.5	102795
318	21935.7	33191.5	37175.4	39881.6	58072.8	71739.9	90118.9	102545
319	21914	33096.8	37075.5	39859.9	58237.8	71644.3	90312.1	102848
320	21922.5	33033	37061.9	39858.1	58531	71681.9	90409.5	102908
321	21944.6	33124.4	37144.4	39900.6	58185.3	71599.5	90500.2	102606
322	21872.3	33055	37151.6	40049.6	58463.1	71761.7	90665.2	102613
323	21950.7	33114.3	37189	39964.9	58368.7	71831.4	90554.1	102926
324	21900.5	32994	37192.7	39932.1	58508.3	71826.7	90629.5	103030
325	21990.4	33135	37109.9	39930.8	58605	72002.9	90595.9	103025
326	21913.3	33195.3	37210.7	39862.4	58520.2	72021	90725.6	103097
327	21909.4	33131.2	37177.7	40066.1	58652.1	72153.2	90708.6	103043
328	21918.1	33113.8	37339.5	40136.2	58700	72140.4	90949	103060
329	21900.9	33240.9	37256.4	40079.6	58728.2	72061.4	90879.5	103195
330	22014.5	33257.6	37223.8	40079.4	58692.4	72170.7	90787.5	103100
331	21993.9	33043.6	37296.3	40112.8	58834	72407.2	90933.2	103195
332	21941	33204.9	37234.1	40082.6	58795.6	72383.5	91014.2	103348
333	21926.3	33201.9	37408.3	40156.7	58873.2	72434.8	91086.1	103285
334	22047.3	33159.4	37333.1	40019.3	58878.3	72367.3	91175.9	103465
335	21920.4	33164.2	37384.6	40009.9	59049.2	72428.6	91042.4	103517
336	22013.9	33196.6	37330.3	40186.4	58952	72621	91160.5	103386
337	21961.8	33324.5	37477.4	40271.9	58877.4	72552.5	91140.7	103604
338	22014.1	33291.4	37380.9	40162.8	59033.9	72680.8	91245.2	103807
339	21990.9	33286.2	37360.1	40266	58959.8	72606.6	91147	103664
340	21949.7	33298.6	37303.4	40240.2	59123.3	72909.1	91447.7	103599
341	21903.3	33208	37403.4	40262.3	59204.7	72836.8	91230	103635
342	21887.8	33271.6	37351.9	40255	59195.1	72963.2	91270.2	103640
343	22026.8	33319.6	37356.7	40289.5	59312.1	72806.4	91449.5	103747
344	21928.6	33326.9	37458	40373.5	59512.5	72954.4	91429.3	103670
345	21851.3	33312.1	37503.5	40412.2	59308.3	73052.9	91552.4	103832
346	21905.9	33257	37502.9	40142.7	59479.9	73032	91517.5	103894
347	21937.7	33278.1	37506.7	40349.1	59444.2	73134.2	91631.9	103713
348	21990	33220.4	37407.2	40339.3	59537	73217.8	91590.6	103861
349	21887.4	33384	37397.6	40327.8	59519.8	73236.9	91659.9	103713
350	21915.7	33328.3	37546.1	40451	59587.9	73253.2	91645.9	103813
351	21884.2	33258.4	37491.3	40418.9	59450.7	73265.6	91639.9	104032
352	21983.8	33363.2	37456.1	40344.4	59581.4	73257.6	91753.4	103794
353	21934.2	33362.1	37527.4	40379.5	59564.4	73382.6	91657.1	103911
354	21972.6	33359.2	37535.8	40481.1	59670.1	73473.2	91886.6	104259
355	22007.1	33279.1	37579.3	40456.9	59687.8	73482.8	91781.7	104108
356	22002.8	33361.2	37630.2	40566.5	59860.4	73745.1	91783.1	104121
357	21982.6	33370.6	37578.8	40447.4	59779.2	73623.3	91909.2	104191
358	21905.5	33338.1	37476.7	40411	59967.7	73558.4	91874	104419
359	21928.9	33415.7	37540.7	40464.8	59961.8	73609.7	92080.9	104433
360	21989.4	33322.8	37610.1	40663.2	59885.3	73777.1	91965.8	104181
361	21948.2	33422.4	37573.9	40631	59996.9	73876.3	92068.5	104241
362	21928.1	33532.6	37734.8	40552.1	59944.5	73813.7	92114.5	104509
363	21992.9	33408.5	37667.8	40631.7	59915.8	73768.3	92183.9	104299
364	21889.1	33507.4	37562.9	40767.6	60006.1	73889.4	91915.1	104467
365	21871.9	33508.8	37591.5	40693.5	60192	74049.9	92019.4	104527
366	21838.8	33508	37627.6	40761.9	60225.3	74127.1	92196.5	104483
367	22053.8	33369.8	37718.5	40640.9	60273.5	74062.1	92120.7	104699
368	21936.1	33411.4	37581.2	40836.8	60234.8	74334.8	92351.4	104543
369	21903.3	33456.9	37731.5	40745.7	60301.2	74155.6	92182.8	104345
370	21829	33416.4	37617.3	40707.3	60364.3	74225.3	92473.2	104594
371	21946.1	33464.9	37611.9	40795.2	60412.2	74185.3	92253.2	104653
372	21996.9	33602.7	37751.1	40858.9	60224.1	74249.7	92286.9	104730
373	21971.4	33541.6	37640.9	40814.4	60508.5	74301.2	92374.3	104624
374	21886.6	33471.5	37629.8	40765	60280.1	74335.7	92483.3	104772
375	21863.8	33450.5	37653.7	40832.6	60441.7	74505.9	92449.9	104598
376	21985.1	33435	37740.5	40859.3	60585.3	74341.9	92498	104848
377	21992.9	33530.7	37779.4	40944.4	60521.2	74548.6	92701.3	104694
378	22015.6	33603.4	37801.4	40900.4	60474	74609.3	92559.2	104627
379	22010.2	33472.2	37798.7	40810.8	60509.1	74644.9	92801.2	104835
380	21925.4	33559.6	37830.7	40942.4	60684.3	74758.1	92586	104914
381	21896.7	33545.6	37793.8	40947.9	60619.3	74769.8	92656.1	104757
382	21940.2	33556.8	37709.1	41091.3	60746.1	74861.9	92672.6	104703
383	21972.6	33408.9	37765.5	40878.7	60838.8	74789.3	92574.3	104862
384	21892.5	33547.3	37915.2	40920	60787.2	74796.7	92755.6	104979
385	21966.3	33599.5	37856	41029.9	60807.2	74914.8	92620.2	104923
386	21874.2	33617	37730.5	41137.9	60923.7	75124.8	92927.1	104966
387	21897	33646.6	37858.6	41141.9	61008.4	74954.9	92656.8	104949
388	21946.7	33613.9	37731	41137	60997.3	75085.2	92698.5	104848
389	21849.7	33536.3	37901.8	41093.6	61138.8	75154.8	92813	104650
390	21869.5	33688.9	37933.9	41175.6	61012.4	75246.2	93013.1	104869
391	21917.6	33602.3	37780.5	41020.3	61015.9	75223.1	93015.4	104932
392	21837.6	33549.6	37894.8	41055.6	61237.8	75171.7	93018.9	104989
393	21847.7	33579.9	37887.9	41233.2	61254.2	75123.5	93049.4	105085
394	21852.2	33658.1	37853.9	41220.9	61155.9	75205.1	93049	105111
395	21930.3	33605	37917.4	41284	61342.5	75452.7	93328.9	105084
396	21906.8	33641.3	37824.6	41158.4	61206.4	75476.6	93023.6	104882
397	21923.7	33548.5	37863.4	41307.4	61261.4	75320.4	93109.5	105163
398	21954	33744.3	38020.7	41201.1	61215.5	75284.7	93213.5	105122
399	21991.1	33653.4	37784.2	41398.5	61454.1	75387.1	93250.5	104973
400	21925.5	33727.8	37980.5	41341.2	61336	75592.1	93107	105055
401	21912.8	33701.3	37877.4	41252.7	61382	75572.4	93240.5	105138
402	21917.4	33604.6	37856.5	41273.2	61418.2	75494.6	93188.6	105243
403	21827.2	33705.9	37909.8	41332.9	61658.5	75661.7	93096.8	105217
404	21916	33746.1	37944.6	41458.8	61491.7	75702.8	93251.5	105330
405	21933.8	33722.5	37778.4	41392.2	61520.7	75795.2	93279.2	105300
406	21898	33642.8	37998.7	41401.1	61530.4	75688.5	93443.4	105211
407	21949.1	33738.6	38001.2	41418	61616.7	76006.3	93385	105191
408	21928.8	33643.3	37976.1	41344.2	61622.7	75895.9	93354.9	105262
409	21918.6	33724.4	37906.9	41506.1	61764	76048.8	93628.9	105205
410	22004.2	33681.8	38021.7	41464.2	61666.5	76048.1	93443.6	105334
411	21953.8	33658.8	38103.8	41401	61743.1	76128.6	93403.5	105350
412	21900.3	33744.3	38039.4	41543.6	61834.7	75994.4	93579.8	105294
413	21867.5	33691.1	37965.4	41506.7	61742.2	76066.6	93444.5	105310
414	21852.5	33733.8	38008.3	41537.8	61950.9	76113.6	93687.4	105323
415	21893.3	33829.7	37935.1	41641.7	61943.9	76118.1	93449.4	105339
416	21930.9	33767.6	38032.1	41485.8	61949.3	76129.8	93479.9	105472
417	21845.6	33772.2	37967.3	41605.8	62041.3	76177.5	93744	105339
418	21966	33798.2	38075.9	41731.1	62081.2	76293.7	93536.5	105525
419	21835	33930.7	37886.9	41572	62000.9	76126.9	93691.4	105382
420	21917.1	33784.8	38032.7	41640.4	62129.9	76211.7	93868.8	105409
421	21908.8	33819.8	38107.6	41664.1	61990.7	76110.9	93795.4	105477
422	21876.7	33782	38040.7	41715.3	61927.4	76505.8	93504	105573
423	21922	33724.6	37986.9	41788.9	62120.2	76560.2	93701.5	105579
424	21836.4	33829	38021.6	41705.2	62186.7	76293	93809.6	105816
425	22037.5	34033.8	37978.8	41732.9	62252.2	76647.8	93865.6	105497
426	21950.4	33841.9	38041.8	41595.7	62347.5	76504.3	93620.7	105880
427	21870.5	33840.3	38019.4	41674.6	62186.7	76409.7	93808	105696
428	21911.1	33845.8	38067.2	41726.7	62194.6	76803.7	93852.2	105631
429	21965.4	33816.9	38102.5	41900.2	62424.1	76714.7	93878.4	105976
430	21858	33841.3	38206.5	41846.6	62280.1	76634.4	93812.6	105925
431	21971.5	33972.1	38047.2	41909.1	62596.7	76617.7	93788.2	105653
432	21952.4	33962.4	38120.4	41783.5	62311.6	76802.3	94024.6	105887
433	21943.1	33943.2	37988.9	41896.2	62403	76932.7	93833.7	105611
434	21873.5	33943	38036.7	41891.1	62424	76743.1	94185.8	105655
435	21952.7	33897.2	38047.5	41935.9	62506.1	76866.2	94081.7	105811
436	21968.2	33953.4	38132.1	41967.6	62560.2	76773.2	93986.1	105760
437	22038.6	33832.5	38030	41973.6	62524.4	77025.1	94005.2	105723
438	21933.3	33933.8	38042.3	42089.8	62657.3	77082.2	94061.1	105759
439	21797.6	33943.2	38164.2	41906.2	62613.4	76935.9	93985.9	105859
440	21998.7	33929.7	38111.9	42107.4	62726.9	76978.1	94168.1	106005
441	21946.8	33917	38106.5	42185	62690.7	77038.5	94094.9	105806
442	21899.2	33956.3	38089.5	42015.4	62765.1	77130.5	94281.5	105844
443	21972.9	33977.8	38108.5	42148.9	62788.3	77146.7	94239.9	105862
444	21974.9	33920	38236.7	42119.8	62889.3	77223.1	94239	106090
445	21880.9	33993.6	38153.8	42176.7	62986	77041.6	94196.7	105958
446	21887.7	33917.6	38176.6	42207.1	62990.1	77316.6	94128.2	106111
447	21882.7	34086.1	38078.3	42225.6	62964.4	77365.3	94387.9	105923
448	21924.1	33984.6	38116.3	42209.6	62940.5	77401.4	94336.7	105831
449	21910.4	34002.8	38168.3	42322.3	62960.7	77334.5	94159	105833
450	21908.6	34065.3	38029.8	42289.2	62822.3	77391.4	94251.9	105834
451	21899	33948.4	38233.8	42309.7	62933	77235.9	94270.5	105982
452	21840.8	34059.7	38115.3	42351.9	63333.9	77454.3	94379.2	106112
453	21939.4	34063.1	38148.1	42385.1	63183.1	77524.4	94378.5	106193
454	21829.6	34025.7	38116.5	42331.1	63151	77509.2	94433.1	106161
455	21926	33989.5	38114.1	42380	63285.1	77602.7	94417.1	106002
456	21970.7	34054.4	38202.4	42422	63165.6	77551.3	94580.2	106337
457	21882.4	34148.9	38144.4	42473.7	63225.1	77619.6	94455.6	106178
458	21997	34151.2	38178.5	42389.1	63243.9	77598.7	94564.9	106294
459	21964.1	34207.8	38181	42441.3	63326.1	77574.6	94414.6	106103
460	21919.7	34163.4	38230.9	42358.3	63252.2	77661.6	94554.3	106196
461	21821	34125.5	38135.7	42535.5	63416.7	77875.5	94658.4	106131
462	21834.1	34127.3	38282.5	42423.7	63299.1	77765.6	94415.8	106150
463	21854	34011.5	38252.8	42588	63424.9	77927.4	94541.4	106161
464	22050.2	34101.7	38312.2	42561.7	63380.9	77837.1	94663.5	106373
465	21847.5	34132.5	38100.4	42611.4	63466.2	78004.3	94647	106178
466	21828.6	34133.1	38152.1	42631.8	63469.9	77829.4	94443.7	106219
467	21966.4	34009.2	38124.6	42512.8	63608.6	77964.9	94732.8	106309
468	21942.9	34058.2	38319	42508.8	63588.4	77892.7	94733.9	106118
469	21888.8	34165.6	38281.3	42515.1	63573.6	77911.9	94744	106390
470	21880	34245.7	38091.1	42646.1	63483.1	78159.7	94651.5	106481
471	21895.3	34032.7	38093.9	42639.8	63646.9	78015.3	94732.9	106195
472	21820.6	34220.2	38252.9	42683.9	63758.9	78015.1	94599.2	106457
473	21885.1	34171.3	38235.9	42787.1	63427	78178.3	94856	106241
474	21943.8	34221	38189.1	42709.4	63747.5	78194.5	94759	106506
475	21913.6	34158.2	38317.3	42597.7	63639.6	78294.6	94887.4	106625
476	21798.1	34141.4	38240.3	42789.7	63636.3	78440.7	94973.1	106453
477	21846.8	34176	38307.5	42649.5	63739.7	78132.2	94796.8	106401
478	21866.4	34244.6	38369.4	42870.9	63981.6	78278.9	94829.9	106612
479	21841	34274.4	38303.4	42909.8	63908.6	78405.7	95024.6	106525
480	21839.5	34295.8	38362.3	42932.5	63844.2	78299.4	95142.4	106585
481	21891.5	34266.2	38193.8	42919.2	64110.3	78297.4	94952.4	106341
482	21978.3	34235.8	38233.4	42888.2	63909.9	78627.9	94989.4	106386
483	21867.9	34118.7	38343.6	42731.7	64082.9	78530.6	95002.2	106356
484	21957.8	34187.3	38232.2	43038.1	63915.9	78389.8	94986.1	106685
485	21878.7	34152.4	38258.1	42921.7	63882.7	78509	95038.2	106789
486	21931.2	34257.6	38385	42989.5	64156.2	78557.8	94963	106882
487	21830.5	34324.5	38295.9	42999.8	64162.1	78577.3	94924.5	106613
488	21842.2	34323.6	38266	42948.2	64011.8	78596	94812.5	106768
489	21863.3	34276.7	38331.5	43070	64037.2	78791.7	95061.9	106588
490	21895.3	34394.8	38384.1	43087.8	64111	78584.7	95050.8	106713
491	21874.7	34304	38387.5	42955.1	64159.6	78731.2	95091.2	106686
492	21836.9	34236.5	38386.5	42905.8	64263.5	78478.8	95201.2	106492
493	21849.9	34344.2	38330	42964.3	64386.7	78605.4	94996.6	106784
494	21861.3	34233.8	38455.2	42967	64151.2	78692	95243.9	106737
495	22038	34333.4	38319.7	43146.8	64264.8	78806	95221.2	106695
496	21893.3	34282.4	38412.6	43252.4	64342.9	78916.5	95212.4	106541
497	21828.1	34245	38203.1	43144	64492.9	78881.2	95171.9	106542
498	21936.5	34297.4	38312.9	43041.1	64415.5	78792.9	95361.6	106831
499	21936.3	34459.7	38300.1	43331.5	64603.5	78826.1	95151.4	106836
500	21872.3	34377	38397.2	43230.4	64371.2	78816.2	95228.1	106835
501	21886.7	34398.5	38362.6	43185.9	64572	78990.8	95037.3	106995
502	21840.6	34528.1	38389.1	43387.1	64528.3	79172.3	95239.7	106875
503	21867.2	34373.9	38323.5	43251.6	64524.4	79016.2	95308	106810
504	21886	34359	38416.6	43330.7	64604	79083.6	95131.9	106708
505	21855.3	34380.9	38322.6	43360	64602.5	79134.4	95378.6	106988
506	21938.8	34455.1	38478.3	43292	64620.4	78927.9	95414.9	106941
507	21916.6	34299.8	38326.7	43195.3	64767.9	79224.5	95208.5	106746
508	21912.9	34319.9	38280.3	43337.3	64772.8	79189	95452.6	106746
509	21907.4	34526.5	38231.8	43484.5	64716.4	79178.9	95284.5	106869
510	21945.8	34377.9	38432.9	43405.1	64720.1	79179.5	95524.9	107078
511	21857.2	34432.6	38415.4	43474.4	64661	79214.2	95289.1	107110
512	21871.9	34527.8	38474.2	43446.9	64803.4	79201.9	95446.3	107166
513	21822.4	34449.4	38350.6	43355.4	64821.8	79274.4	95242.4	106798
514	21782.5	34457.7	38609.7	43471.6	64725.1	79197.2	95448.5	107201
515	21813.7	34485.8	38493.9	43479.2	64978.6	79394	95464.2	106848
516	21844.6	34359.4	38469.3	43475.7	64899.1	79347.3	95423.3	106958
517	21855	34465.3	38388.8	43567.2	65035.7	79383.2	95669.1	107041
518	21871.7	34419.5	38529	43576.6	64987.6	79411.8	95687.5	106954
519	21980.7	34589.3	38493.9	43673.4	64931.8	79332.6	95415.9	106916
520	22005.4	34490.1	38437.9	43548.1	64879.3	79388.2	95481.3	106959
521	21998.5	34557.2	38457.3	43585.3	64900.2	79534.4	95671.1	107106
522	21922.9	34478.4	38468.2	43716.8	65167.5	79471.8	95782.9	107103
523	21918.7	34614.9	38402.2	43821.7	65054	79436.5	95515.1	107002
524	21921.8	34486.6	38463	43705.6	64955.2	79561.3	95581.2	107131
525	21819.2	34579	38430.6	43758.1	65101.3	79467.7	95683.6	107180
526	21868.8	34658.3	38505.3	43667.7	65143.6	79776.4	95627.2	106989
527	21936.8	34548.4	38502.9	43739.5	65214.6	79516	95692.4	107143
528	21766.7	34644.9	38371.7	43750.6	65154.9	79598.1	95588.4	107135
529	21844.8	34518.1	38413.4	43650.3	65246.6	79685.8	95478.7	107315
530	21845.8	34581.1	38432.3	43782.1	65371.8	79624.9	95848.6	107299
531	21891.5	34578.8	38505	43898.2	65108.7	79817.6	95796.6	107299
532	21950.6	34573.1	38467.2	43779.2	65355.4	79932.3	95660.7	107301
533	21933.5	34570.8	38385.2	43901.6	65405.1	79732.1	95703	107284
534	21865.4	34720.2	38508.4	43822.9	65372.9	79730.5	95728.3	107226
535	21904.2	34675.5	38551.1	43740.6	65394.2	79850.7	95606.4	107133
536	21899.8	34635.9	38625.4	43976.6	65569.1	80041.5	95761.6	107400
537	22021	34768.1	38541.9	44078.6	65521.6	80002.8	95865.4	107534
538	22054	34562.4	38611.1	43992.9	65489.7	80004.3	95759.7	107150
539	21957.6	34716.9	38476.1	44132.6	65641	79913.9	95860.1	107236
540	21909	34677.3	38418.3	44094.1	65661.8	79955.4	95926	107363
541	21903.9	34683.1	38497.5	44015.4	65609.1	79906.9	95805.6	107277
542	21874.7	34729.7	38536.3	44147.5	65493.2	80129.1	95955.8	107329
543	21921.2	34760.4	38554.8	44076.9	65532.6	80124.9	95852.7	107364
544	21876.6	34716.1	38518.2	43972.8	65636.6	79979.1	95984.8	107440
545	21951.8	34700.8	38672.2	44076.2	65714.3	80060	95899.4	107297
546	21823.9	34764.3	38576.6	44063	65608.5	80122.8	95822.4	107321
547	21855.2	34768.6	38485.2	44268.9	65718.4	80070.5	96012	107337
548	21800.3	34834.8	38544.7	44241.3	65571.4	80265.3	95929.2	107409
549	21915.3	34742.9	38625.6	44246.8	65756.7	80197.1	96012.1	107430
550	21863.7	34860.1	38493.2	44145.4	65756.1	80235.1	96077.4	107467
551	21951.3	34744.8	38632.7	44345.6	65770.3	80222.9	96195.5	107527
552	21883.7	34742	38496.6	44183.1	65750	80114.7	96048.1	107446
553	21800.8	34799.4	38352.6	44326.9	65875.1	80145	96143.1	107662
554	21869.3	34777.2	38572.4	44289.4	65794.8	80318.1	96103.3	107513
555	21831.4	34771.8	38649.4	44466.9	65995	80165.3	96033.9	107648
556	21910	34787.1	38457.9	44388.7	65885.5	80285.7	96030.5	107612
557	21880.5	34871	38567	44277.7	66022.3	80471.2	96145.4	107532
558	21889	34784.1	38690.1	44376.1	65888.3	80390.4	96296.2	107423
559	21916.9	34810.4	38578.8	44642.5	66021.3	80323.5	96245.2	107803
560	21926.4	34859.7	38492	44323.5	66135.7	80304.6	96424.9	107511
561	21830.4	34856.5	38628.9	44357.4	66055.3	80482.4	96189.3	107679
562	21813.2	34852	38449.7	44551.5	66035.4	80332.5	96323.9	107833
563	21868.6	34809.4	38622.1	44428.6	66025.9	80653.6	96359	107710
564	21893.3	34756.2	38558.1	44654.7	66156.3	80351.7	96089.1	107670
565	21830.1	34830.3	38569.6	44583.3	65932.9	80403.1	96382	107558
566	21898	34857.2	38589.9	44670.5	66176.9	80484.3	96270.6	107667
567	21905.4	34973.4	38658.3	44558.7	66180.5	80550.9	96393.7	107543
568	21868.2	34917.1	38569.1	44670.8	66288.2	80467.1	96441	107593
569	21945.1	34995.4	38558	44621.3	66051.2	80394.5	96306	107563
570	21886	34998.9	38590.5	44736.9	66288	80385.5	96582.1	107502
571	21956.7	34930.1	38635.4	44598.6	66216.8	80772.1	96420.3	107788
572	21826	34966.7	38528.9	44697.7	66464.5	80656.6	96464.3	107337
573	21854.2	34939.9	38631.6	44658.4	66388.9	80752.3	96422.6	107664
574	21881.5	35135.6	38553.5	44812.7	66350.5	80592.4	96264.5	107700
575	21902.2	34977.5	38511.8	44819.6	66396.8	80626.1	96384.7	107679
576	21835.2	34867.4	38650	44790.7	66540.7	80757.1	96384.6	107757
577	21829	34911.7	38646.2	44784.9	66237	80666.8	96185.1	107769
578	21892.3	35047.6	38702.4	44732.2	66544.7	80753.4	96417.4	107631
579	21892	34934.3	38693.1	44895	66536.6	80693.5	96499.6	107672
580	21767.5	34995.2	38706.4	44867.5	66485.6	80856.3	96654.5	107528
581	21913	35037.6	38625.5	44779.2	66488.8	80970.4	96473.5	107855
582	21872.2	35119.1	38612.8	44927.4	66569.7	80804	96499.4	107840
583	21902.1	35001.3	38679.6	44916.4	66557.4	81038.6	96686.1	107900
584	21845.6	35103.9	38638.2	44939.6	66401.7	80825.8	96556.7	107842
585	21906.1	35047.2	38507.3	44862.1	66436.6	80760	96782.9	107930
586	21941.7	35023.8	38696.4	44998.1	66569.2	80919.9	96525.9	107750
587	21813.7	34985.8	38587.7	44976.4	66735.2	80904.2	96654.1	107839
588	21829.3	35006.2	38671.8	45012.9	66621.2	80951.6	96710.6	107667
589	21877.4	35018.4	38746.8	45039.8	66573.5	80983.7	96694.2	107878
590	21896.3	35045.5	38726.9	45046	66631.6	81065.5	96654.3	107670
591	21950.5	35100.9	38719.7	45131	66813.1	81082.3	96619.8	107733
592	21959.6	35138.3	38742	45120.2	66838	81098.6	96740.6	107918
593	21850.4	35112.4	38583.1	45246.9	66801.7	81241.9	96570.4	107865
594	21881.1	35073.4	38637.9	45234.5	66931.1	81012.4	96788.6	107843
595	21879.6	35185.1	38672	45192.3	66895.7	81196.9	96758.9	107741
596	21912.9	35117.4	38619.1	45167	66788.8	81279	96565.8	107909
597	21900	35179.7	38689.8	45175.2	66791.1	81206.9	96851.1	107690
598	21908.8	35164.1	38589.6	45308.5	66775.7	81292.8	96848.3	107737
599	21890.8	35208.4	38693.8	45346.4	66906.9	81153.4	96802.3	107945
600	21876.8	35206.8	38744.1	45323	66947	81025.6	96580.9	107943

## Sheet: Sheet3
cacl2(mM)	rate
0	-4.35
0.13	60.76
0.26	94.22
0.52	149.59
1.04	166.6
2.08	228.86
4.1	361.98
8.3	480.01
cacl2(mM)	rate
0.13	60.76
0.26	94.22
0.52	149.59
1.04	166.6
2.08	228.86
4.1	361.98
8.3	480.01
