# Supplementary material for: Daptomycin forms a stable complex with phosphatidylglycerol for selective uptake to bacterial membrane
Source: eLife. 2025 Jun 2;13:RP93267. doi: 10.7554/eLife.93267 (PMC12129450; doi:10.7554/eLife.93267)
Supplement: Figure 2—figure supplement 2—source data 1. [file elife-93267-fig2-figsupp2-data1.xlsx]

## Sheet: Multi Scans KIN
Multi Scans KIN
Labels	3 a1 KIN	1 KIN	2 KIN	3 KIN	4 KIN	5 KIN	6 KIN	7 KIN
Type	Kinetic Scan	Kinetic Scan	Kinetic Scan	Kinetic Scan	Kinetic Scan	Kinetic Scan	Kinetic Scan	Kinetic Scan
Comment
Start	0	0	0	0	0	0	0	0
Stop	600000000000	600000000000	600000000000	600000000000	600000000000	600000000000	600000000000	600000000000
Step	1000000000	1000000000	1000000000	1000000000	1000000000	1000000000	1000000000	1000000000
Fixed/Offset
XAxis	Time(ns)	Time(ns)	Time(ns)	Time(ns)	Time(ns)	Time(ns)	Time(ns)	Time(ns)
YAxis	Counts	Counts	Counts	Counts	Counts	Counts	Counts	Counts
0	8882.13	60545.4	70137.1	80432.4	112154	136285	153198	52800.3
1000000000	8700.62	60948.9	70701.3	81010.5	113024	137188	154472	52866.3
2000000000	8782.7	61166.7	71098.6	81702.2	113843	138074	155331	52910.8
3000000000	8821.43	61549.9	71574	82051.6	114735	139206	156306	52662.8
4000000000	8781.41	61864.2	72249.7	82695.6	115428	140289	158026	52812.3
5000000000	8808.37	62228.8	72598.9	83234.3	116137	141717	158707	52822.4
6000000000	8779.65	62474.6	73251.9	83660.5	116969	142532	159791	52842.3
7000000000	8793.77	62841.4	73568.4	84200.5	117753	143601	161082	52960.1
8000000000	8751.88	63045.8	73997.1	84709.3	118593	144513	162032	52960
9000000000	8724.72	63411.1	74323.2	85286.5	119018	145535	163266	53016.3
10000000000	8787.56	63781.1	74656.6	85733.5	119818	146700	164106	53042.9
11000000000	8697.09	63932.3	75142.5	86094.4	120583	147257	164959	52932.2
12000000000	8772.19	64059.5	75463.8	86713.2	121109	148294	166129	53017
13000000000	8817.91	64434.8	75801.5	87082.1	121840	149187	166961	53027.3
14000000000	8725.71	64556.6	76228.4	87494.7	122604	149987	167946	53064.9
15000000000	8749.88	64909.3	76634.3	87654.2	123215	150820	168480	53217.8
16000000000	8766.17	65191.3	76817.4	88324.9	123844	151859	169576	53012.4
17000000000	8712.18	65254.8	77385.4	88669.9	124480	152583	170410	53068.1
18000000000	8695.14	65661.9	77567	89258.3	125228	153307	171415	53141.3
19000000000	8660.23	65880.6	77880.5	89363.7	125791	154123	172077	53213.5
20000000000	8737.29	66043.9	78255.8	89757.4	126288	154944	173068	53226.7
21000000000	8703.35	66294.9	78306.6	90065.5	126800	155608	173793	53068.9
22000000000	8799.5	66333.8	78856.2	90569.4	127637	156515	174275	53054.7
23000000000	8780.13	66599.5	79178.2	90800	128100	157132	175184	53170
24000000000	8724.17	66853.7	79467.5	91094.5	128758	157997	175964	53142.5
25000000000	8718.98	67208.5	79776.3	91681	129019	158627	176861	53332.1
26000000000	8710.53	67294.6	79989.7	91937.8	129649	159332	177295	53384.5
27000000000	8776.51	67335.6	80342.4	92064.1	130178	159970	178200	53312.7
28000000000	8710.14	67640.2	80671.7	92580.2	130711	160674	178888	53179.5
29000000000	8688.38	67809.6	81044.2	93027.9	131188	161600	179512	53278.4
30000000000	8715.86	67960.8	81002.8	93170.6	131569	162128	180244	53263.4
31000000000	8745.26	68243.5	81249.8	93368.3	132305	162587	180640	53193.8
32000000000	8751.08	68222.8	81485.7	93825.9	132705	163480	181308	53261.3
33000000000	8678.3	68452.7	81834	94038.8	133237	164114	182457	53142.2
34000000000	8662.08	68650.5	81958.4	94420.9	133594	164851	182898	53383.3
35000000000	8670.04	68858.6	82496.3	94656.7	133798	165259	183433	53436
36000000000	8679.95	69072.8	82533.9	95038.8	134637	165898	184066	53452.3
37000000000	8727.15	69335.4	82778.5	95263.4	134911	166264	184785	53470.5
38000000000	8681.26	69283.6	83213.6	95542.8	135422	166954	185731	53452.1
39000000000	8660.86	69391.2	83336.4	95699.2	136068	167693	185989	53257.8
40000000000	8668.4	69543.6	83449.9	96148.1	136592	168294	186591	53487
41000000000	8685.31	69730.6	83858.8	96517.4	136994	168496	187403	53355.6
42000000000	8748.87	69972.5	83895.7	96514.4	137322	169464	187877	53405.2
43000000000	8730.04	70089.1	84208.7	96693.6	137792	169978	188306	53573
44000000000	8698.72	69987.6	84261.8	97158.5	138149	170484	189618	53551
45000000000	8665.87	70261.5	84516.6	97443.2	138741	171297	190276	53455.3
46000000000	8699.56	70348.5	84886.9	97501.6	139056	171633	190848	53481.7
47000000000	8658.77	70701.7	85038.6	97658.5	139651	172295	191353	53422.4
48000000000	8700.96	70665	85230.5	97897.7	140102	172679	191783	53655.8
49000000000	8666.79	70903.2	85401	98417.8	140247	173334	192519	53574
50000000000	8708.75	71125.6	85546.2	98653.6	140981	173652	192952	53626.7
51000000000	8660.91	71093.4	85783.6	98842.8	141284	174240	193325	53510.2
52000000000	8719.07	71170.4	85956.4	99133.7	141683	174650	193938	53467.6
53000000000	8711.97	71390.8	86131.1	99009.5	142155	175127	194546	53559.9
54000000000	8688.53	71307	86400.7	99561.5	142514	175945	194897	53731.6
55000000000	8658.66	71647.5	86572.4	99757.4	142707	176267	195308	53433.6
56000000000	8675.69	71589.8	86533.5	99990	143147	176715	196042	53576.5
57000000000	8650.52	71711.3	86913.4	100179	143654	177098	196446	53583.5
58000000000	8702.11	71865.9	87251.3	100493	144149	177903	197060	53634.2
59000000000	8673.97	71975.9	87170.9	100745	144381	178216	197822	53813.4
60000000000	8679.16	71987.7	87455.4	100728	144806	178829	197958	53700.8
61000000000	8693.65	72343.6	87591.9	101070	145039	179329	198230	53770.1
62000000000	8658.42	72434.5	87708.6	101003	145532	179518	199092	53629.9
63000000000	8682.23	72513	88039.2	101509	146062	179872	199245	53728.6
64000000000	8692.51	72543.4	87862.1	101798	146255	180551	199681	53666.3
65000000000	8643.77	72584	88187.1	101709	146677	181007	200243	53659
66000000000	8633.85	72841.1	88583.8	101990	147291	181168	200546	53743.8
67000000000	8667.38	72953.4	88582	102569	147376	181854	201081	53664
68000000000	8650.72	72940.5	88895	102581	147921	182130	201937	53651.2
69000000000	8678.96	73203.4	89038.8	102706	148049	182752	201740	53772.3
70000000000	8726.87	73211.5	88958.6	102943	148502	183176	202677	53739.3
71000000000	8707.5	73379.3	89225.3	103111	148952	183560	202884	53922.2
72000000000	8646.04	73461.4	89325.9	103328	149058	183956	203542	53660
73000000000	8716.09	73688.9	89618.9	103478	149691	184522	203910	53835.2
74000000000	8688.09	73731	89769	103649	149820	185069	204498	53869
75000000000	8743.53	73692.1	89985.5	104183	150295	184946	204625	53806.1
76000000000	8678.2	73799.5	89970.1	104017	150773	185653	205280	53748.2
77000000000	8657.58	73861	90205.1	104212	151226	186123	205294	53841.7
78000000000	8699.94	74032.7	90342.9	104309	151532	186423	205908	53804.2
79000000000	8665.48	73853.1	90272.7	104915	151740	186780	206321	53777.2
80000000000	8656.01	74197.9	90784.1	104743	152132	187271	206391	53934.1
81000000000	8643.06	74286.7	90626.9	104963	152661	187692	207145	53915.6
82000000000	8724.89	74233.4	90875.8	105178	152696	188242	207612	53802.8
83000000000	8661.83	74384.8	91017.7	105507	153063	188255	208003	53707.2
84000000000	8676.31	74346.4	91141.3	105350	153445	188757	208371	53995
85000000000	8625.98	74636.6	91021.3	105635	153720	189271	208847	53963.2
86000000000	8639.47	74654.4	91366	105816	154204	189490	208892	53971
87000000000	8639.05	74657.8	91337.1	106230	154505	190041	209548	53923.3
88000000000	8670.55	74706.5	91512.8	106340	154913	190411	209656	53683.2
89000000000	8707.83	74952.9	91774.6	106565	155068	190913	210053	53789.3
90000000000	8685.97	75082.9	91719.7	106733	155519	191256	210617	53894.2
91000000000	8671.4	75138.6	92033.7	106961	155915	191483	210943	53869.4
92000000000	8673.62	75135.7	92145.8	106970	155914	191642	211397	53687
93000000000	8647.83	75255.9	92094.1	107069	156391	192170	211688	53891.1
94000000000	8653.91	75365.5	92284.1	107296	157145	192435	212019	53951.5
95000000000	8664.57	75416.1	92468.3	107249	157261	192926	212291	53810.2
96000000000	8678.85	75417.9	92630.1	107534	157401	193321	212800	53951.1
97000000000	8714.92	75566.5	92925.8	107554	157731	193708	213165	53907.4
98000000000	8683.63	75577.9	92932.1	107624	158095	193974	213130	53762.1
99000000000	8680.78	75825.9	92868	108083	158367	194365	213885	53915.5
100000000000	8626.71	75726.5	93116	108185	158833	194508	213984	53895.8
101000000000	8713.46	76043.9	93179.2	108466	159052	194833	214614	53885.6
102000000000	8679.43	76027.3	93531	108314	159711	195126	214774	53973.5
103000000000	8721.37	76180.3	93315.8	108631	159850	195465	215273	54005.4
104000000000	8663.6	76119.5	93638	108944	160154	195720	215674	53944.7
105000000000	8682.15	76287.7	93800.2	109001	160362	196446	215716	53944
106000000000	8727.43	76324	93701.9	109087	160698	196469	216060	53963.6
107000000000	8669.36	76396.6	93853.7	109147	160821	196840	216215	54094.4
108000000000	8697.18	76553.6	93937.9	109387	161211	197308	216756	53910.6
109000000000	8721.37	76475.3	94103	109396	161495	197461	216884	53884.6
110000000000	8714.23	76643.5	94167.1	109658	161824	197766	217597	54026.8
111000000000	8634.35	76726.3	94376.2	109693	162255	198291	217852	53946.2
112000000000	8693.02	76758.3	94446.8	110177	162546	198444	218226	53953.1
113000000000	8688.6	76912.9	94688.2	110139	162990	198865	218710	53888.9
114000000000	8737.42	76934.6	94715.1	110257	163156	199177	219089	53975.4
115000000000	8726.89	76939.8	94835.5	110453	163517	199304	219371	54004.2
116000000000	8657.89	76856.7	94475.1	110554	163749	199863	219389	53988.3
117000000000	8690.65	77067.7	95086.4	110866	163993	199878	219740	54127.5
118000000000	8682.45	77063.8	95039.6	110896	164392	200389	219836	54002.9
119000000000	8644.51	77166.7	95177.6	110883	164787	200717	220292	53976.2
120000000000	8743.64	77179.4	95339.1	111242	164970	200872	220547	54040.4
121000000000	8735.93	77384.4	95290.2	111249	165074	201146	220943	53888.5
122000000000	8686.66	77283.4	95513	111121	165584	201578	221064	53976.2
123000000000	8684.39	77528.9	95601.4	111548	165688	201823	221484	53908.2
124000000000	8704.89	77511.2	95414.5	111766	166342	202108	221863	54091.7
125000000000	8706.36	77524.2	95815.3	111945	166225	202146	222299	53892.4
126000000000	8689.22	77725.4	95688.9	112096	166748	202518	222291	54057.9
127000000000	8670.24	77902.7	95513.3	112044	167100	202904	222735	54068.6
128000000000	8729.75	77753	96089.2	112318	167280	203276	222603	54058.9
129000000000	8692.39	77687.2	95956.5	112363	167776	203313	223087	53844.4
130000000000	8670.18	78116.1	96222.4	112533	168199	204013	223536	53868.7
131000000000	8703.18	78004.3	96256.5	112562	168156	204044	223714	54020.1
132000000000	8696	77887.9	96392.5	112652	168492	204200	223852	53994.9
133000000000	8696.17	77966.3	96453.3	112848	168688	204445	224160	53964.1
134000000000	8701.27	78238.8	96447.9	112776	168788	204933	224327	53954
135000000000	8718.49	78175.2	96462.3	113042	169172	205185	224704	54139.8
136000000000	8724.06	78339.5	96631.8	113322	169697	205251	225118	53885.3
137000000000	8705.84	78183	96751.7	113217	169799	205565	225361	53905.9
138000000000	8720.33	78157.4	96834.2	113432	170136	205777	226080	54048.8
139000000000	8768.58	78491.2	96813	113583	170445	206351	225962	54077.2
140000000000	8663.76	78402.5	96983.5	113513	170798	206415	225906	53962.4
141000000000	8705.15	78591.1	97072.5	113861	170953	206876	226709	54041.5
142000000000	8674.94	78728.9	97193.8	114025	171257	206756	226575	53966
143000000000	8707.28	78464.4	97436.3	114077	171561	207241	226798	54069.9
144000000000	8671.88	78805.4	97337.1	114140	171984	207409	227267	53946.4
145000000000	8741.48	78630.6	97342.8	114461	172135	207858	227537	54073.7
146000000000	8646.34	78853.2	97736.1	114399	172174	207899	227732	54264.1
147000000000	8747.57	78848.9	97526	114644	172648	208055	227681	53943.6
148000000000	8728.97	78741.3	97778.3	114852	172731	208664	228146	54101.3
149000000000	8709.73	78968.3	97647.8	114930	173085	208837	228423	54127.9
150000000000	8728.55	79159.8	97755.2	114989	173522	209069	228702	53951.6
151000000000	8754.46	79040.3	98116	115207	173585	209043	229416	53901.8
152000000000	8741	79236.4	98277.3	115182	173867	209510	229281	54180.1
153000000000	8732	79199.3	98238.8	115316	174304	209767	229202	53946.9
154000000000	8713.99	79260.8	98161.2	115363	174587	210018	229588	53940.4
155000000000	8712.33	79194.4	98268.7	115464	175037	210240	230007	54071.1
156000000000	8715.94	79274.7	98359.2	115638	175035	210637	230128	54136
157000000000	8716.52	79382.1	98426.8	115676	175521	210924	230313	54029.2
158000000000	8658.84	79414.9	98499.6	115779	175598	210905	230666	54123.9
159000000000	8680.5	79294.1	98628.7	115876	175875	211086	230892	54010.4
160000000000	8609.35	79507.3	98681	116053	176094	211434	230996	54058
161000000000	8657.93	79616.7	98719.8	116152	176242	211603	231386	54022.5
162000000000	8758.92	79616.8	98798.1	116275	176362	211818	231315	53916.6
163000000000	8747.64	79665.8	98864	116169	177029	212172	231682	54082.6
164000000000	8636.24	79662	99044.3	116576	177081	212245	231874	54025.1
165000000000	8723.6	79725.8	99045	116543	177399	212742	232407	53953.3
166000000000	8673.23	80008	99191.8	116714	177618	212953	232373	54083.5
167000000000	8688.9	79892	99175.9	116771	177881	212632	232484	54006.4
168000000000	8661.99	80052.3	99113.8	117110	178190	213375	232614	54021.4
169000000000	8687.13	79922.6	99352.5	117026	178131	213321	232832	53978.9
170000000000	8683.63	80071.8	99326.2	117220	178657	213824	232853	53888.1
171000000000	8707.23	79943.5	99510.6	117297	179088	213949	233500	54162.7
172000000000	8663.57	80159.9	99495.3	117573	179133	214289	233840	54100.1
173000000000	8709.68	80218.1	99594.4	117481	179578	214298	233596	54189.1
174000000000	8677.86	80190.8	99554.7	117365	179595	214822	234064	54171.5
175000000000	8695.14	80331.3	99544.3	117744	179740	214646	234040	53951.5
176000000000	8617.46	80249.6	99773.9	117980	180081	214719	234350	53990.4
177000000000	8715.79	80494.1	99761.8	117792	180192	215459	234492	54033.6
178000000000	8800.27	80303.4	100042	118010	180578	215209	234995	54114
179000000000	8643.52	80219.1	100089	118055	180875	215428	234860	54026.6
180000000000	8710.18	80612.3	100078	118315	181341	216186	235296	54102.8
181000000000	8726.25	80438.9	100158	118051	181223	215807	235486	53975.2
182000000000	8675.32	80572.1	100199	118622	181419	215999	235211	54143.2
183000000000	8712.66	80797.8	100432	118437	181906	216521	236071	54042.1
184000000000	8695.48	80502.8	100336	118493	182190	216465	236105	54203
185000000000	8661.28	80673.7	100412	118767	182223	216757	236169	54127.8
186000000000	8705.47	80774.4	100480	118502	182362	217035	236050	54207.3
187000000000	8683.19	80872.7	100495	118940	182573	217301	236338	54175.9
188000000000	8673.74	80748.7	100826	119121	182961	217756	237016	54208.7
189000000000	8738.76	80970.4	100789	119015	183339	217550	236716	54222.7
190000000000	8734.11	80925.7	100694	119257	183407	217774	237283	54125.9
191000000000	8682.21	81065.6	100903	119400	183586	217732	237337	54046
192000000000	8715.99	80893.7	100827	119252	183928	217921	237629	54121.1
193000000000	8746.81	81171.2	100949	119504	183940	218502	237806	54113.9
194000000000	8729.35	80911.4	101165	119674	184298	218660	238032	54142.1
195000000000	8680.43	81267.5	101104	119618	184705	218847	238317	54119.3
196000000000	8731.07	81063.9	101230	119892	184975	218963	238450	54103.7
197000000000	8716.23	81202.7	101226	119849	185258	219155	238353	54139.9
198000000000	8648.67	81328.7	101193	120114	185457	219018	238664	54121.1
199000000000	8713.18	81181.4	101187	119992	185580	219531	238792	54180.7
200000000000	8707.87	81323.8	101373	120352	185855	219611	238829	54050.6
201000000000	8671.6	81422.6	101321	120226	185889	220160	238896	53991.8
202000000000	8677.69	81629	101549	120305	186350	220010	239283	54069.1
203000000000	8691.22	81457.1	101510	120596	186541	220063	239291	54084.1
204000000000	8743.55	81671.7	101377	120408	186485	220529	239864	54102.1
205000000000	8633.79	81520.5	101526	120687	186894	220756	239881	54089.4
206000000000	8705.33	81570.5	101965	120851	187352	220948	239900	54103.3
207000000000	8755.25	81720.8	101707	120772	187466	220743	240320	54205.9
208000000000	8657.97	81670.2	101682	120706	187893	221093	240300	54139
209000000000	8650.14	81867.9	102033	120958	187810	221144	240498	54194.3
210000000000	8686.16	81525.1	102112	121113	187974	221350	240858	54069.8
211000000000	8716.28	81653.6	101990	121041	188287	221893	240634	54106.8
212000000000	8676.09	81731.7	102123	121230	188415	221858	241226	54302.6
213000000000	8712.96	81864.8	102115	121283	188516	222100	241279	54148.2
214000000000	8650.68	81770.4	102182	121389	188804	222020	241245	54196.5
215000000000	8766.61	81906	102212	121527	189314	222382	241668	54085.3
216000000000	8705.37	81843.6	102251	121423	189215	222351	241821	54003
217000000000	8679.1	81956.5	102240	121759	189561	222635	241597	53998.4
218000000000	8664.62	82087.8	102492	121682	189866	222896	241658	53988.1
219000000000	8669.64	82183.4	102399	121681	190308	223211	242034	54182.7
220000000000	8666.8	82088.7	102451	121820	190113	223105	242278	54227.8
221000000000	8699.69	82234.9	102572	122278	190736	223265	242148	54275
222000000000	8686.59	82274.5	102807	122177	190540	223645	242532	54102.3
223000000000	8645.52	82248.5	102790	122489	191081	223746	242601	54206
224000000000	8659.54	82197	102694	122045	191105	223849	242685	54073.6
225000000000	8701.83	82292.6	102719	122493	191329	224243	242873	54099.3
226000000000	8669.79	82219.5	102865	122365	191493	224200	243044	54108.5
227000000000	8724.73	82365.4	102734	122417	191831	224325	243533	54011.7
228000000000	8713.39	82373.3	102835	122579	191862	224378	243348	54103.2
229000000000	8625.09	82406.2	102885	122545	192275	224622	243540	54081.5
230000000000	8692.17	82383.1	102821	122766	192357	224866	243648	54040
231000000000	8647.19	82424.4	102958	122619	192667	224844	243951	54112.7
232000000000	8661.87	82708.5	102874	123037	192916	225305	244282	54235.3
233000000000	8672.49	82685.8	103240	123013	192984	225380	244284	54155.6
234000000000	8661.42	82462.2	103351	123297	193395	225495	244526	54249
235000000000	8696.75	82582.7	103059	123007	193650	225732	244316	54071.6
236000000000	8580.77	82705.4	103137	123195	193486	225813	244684	54217.4
237000000000	8670.45	82626.2	103280	123174	193660	226021	244816	54225.8
238000000000	8673.77	82782.4	103354	123432	194288	226169	244968	54163.5
239000000000	8664.15	82774.1	103392	123423	194120	226349	245148	54095.3
240000000000	8709.14	82781.6	103319	123494	194491	226388	245217	54102.2
241000000000	8675.3	82850.9	103612	123661	194732	226448	245468	54129.4
242000000000	8714.66	83016.2	103650	123559	195006	226774	245383	54199.8
243000000000	8643.01	82817.3	103493	123789	195161	226571	245695	54188.6
244000000000	8649.2	83036.7	103722	123850	195206	226860	245735	54109.7
245000000000	8663.87	82952.1	103594	124055	195338	227003	246112	54101.4
246000000000	8698.5	82969.1	103713	123836	195736	227516	245994	54116.6
247000000000	8678.05	83122.5	103859	123958	195770	227266	246087	54052.2
248000000000	8730.43	83008.3	103624	124146	196050	227416	246343	54240.5
249000000000	8695.62	83178.6	103794	124355	196063	227388	246293	54119.7
250000000000	8739.5	83108.6	103793	124329	196476	227692	246654	54064.9
251000000000	8706.73	83213.3	103765	124228	196508	228217	246859	54127.1
252000000000	8669.33	83223.2	104039	124499	196754	227795	246920	54161.5
253000000000	8721.69	82955.7	103920	124477	197493	228538	246968	54040.2
254000000000	8724.38	83200.5	104126	124598	197194	228543	247083	54196.4
255000000000	8671.4	83377.7	104015	124683	197464	228623	247182	54176.2
256000000000	8714.55	83250.7	104092	124892	197738	228733	247431	54009.6
257000000000	8696.89	83379.9	104180	125094	197872	229034	247493	54118.2
258000000000	8661.53	83478	104117	124890	198243	228966	247830	54161.4
259000000000	8660.1	83544.3	104266	125006	198236	228996	248086	54049.8
260000000000	8683.52	83409.6	104266	125088	198529	229262	247724	54033
261000000000	8682.57	83347.8	104255	125206	198685	229523	248086	54256.1
262000000000	8677.01	83660.4	104363	125269	198884	229465	248011	54128.4
263000000000	8690.88	83598.3	104373	125132	198831	229393	248225	54081.6
264000000000	8735.97	83446.8	104602	125426	199088	229759	248625	54191.3
265000000000	8688.3	83476.2	104342	125301	199453	230084	248530	54061.1
266000000000	8703.77	83784.6	104347	125359	199467	230125	248444	54161.9
267000000000	8698.27	83646.5	104552	125493	199832	230262	248784	54002.5
268000000000	8635.24	83930.5	104770	125527	199891	230010	249084	54133
269000000000	8698.57	83810.3	104684	125692	200089	230597	249108	54006
270000000000	8659.96	83689.2	104557	125779	200180	230467	249142	54015.7
271000000000	8710.7	83822.1	104776	125560	200405	230812	249164	54080.8
272000000000	8702.07	83721.8	104794	126122	200479	230865	249297	53996.8
273000000000	8663.89	83877.2	104811	126078	200960	230950	249949	54107.2
274000000000	8668.39	83779	105021	125922	200923	231065	249906	54144.8
275000000000	8723.2	83721.9	104781	126226	201108	231134	249740	54195
276000000000	8661.25	83932.4	104978	126216	201149	231449	250110	54210.9
277000000000	8696.37	83921.7	104932	126212	201543	231752	250114	54107.7
278000000000	8674.75	83822.9	105057	126420	201889	231291	249756	54002
279000000000	8653.64	84056.8	105100	126276	201966	231551	250286	54098.1
280000000000	8708.82	83896	105125	126622	202133	231866	250606	54281.6
281000000000	8701.98	83905.2	105064	126413	202510	232029	250584	54002.3
282000000000	8652.17	84021.7	105053	126544	202399	231941	250580	54293.7
283000000000	8703.25	83951.2	105289	126837	202789	232263	250364	54135.4
284000000000	8665.39	84101.8	105152	126775	203272	232419	251013	54131.2
285000000000	8684.32	84222.8	105232	126934	202805	232341	250752	54074.8
286000000000	8685.11	84182.7	105368	127032	203391	232398	251223	54116.6
287000000000	8718.33	84280.9	105376	126908	203493	232550	251241	54061.2
288000000000	8680.59	84269	105422	127122	203473	232763	251428	54188.3
289000000000	8692.66	84137.2	105389	127366	203756	233094	251543	54038.1
290000000000	8741.31	84109	105498	127183	203864	232979	251613	53932.1
291000000000	8662.84	84107.7	105520	127225	204028	232945	251850	53986.5
292000000000	8670.42	84143.4	105559	127086	204074	233315	251500	54009.7
293000000000	8688.96	84202.9	105286	127339	204132	233198	251774	54154.7
294000000000	8684.94	84282.3	105723	127438	204696	233402	251947	54123.4
295000000000	8689.84	84222	105528	127354	204892	233313	251956	54194.9
296000000000	8708.18	84442	105367	127579	205117	233666	252337	54078.4
297000000000	8699.85	84244.8	105628	127592	205236	233703	252067	54110.2
298000000000	8635.33	84400.9	105881	127765	205590	233749	252421	54029.6
299000000000	8709.51	84509.6	105718	127664	205282	233974	252383	54190.8
300000000000	8698.29	84303.3	105758	127606	205966	234045	252761	53990.8
301000000000	8683.26	84561.7	105809	127846	205875	234375	252873	54234.1
302000000000	8660.04	84674	105798	127992	206096	234176	252535	54074.7
303000000000	8660.27	84429.9	105979	127923	206153	234707	252962	54184.9
304000000000	8758.22	84618.8	105955	128174	206235	234336	252837	54182.4
305000000000	8643.01	84621.2	105884	128120	206514	234835	253118	54116
306000000000	8675.72	84695.3	105984	128170	206713	234670	253247	53999.5
307000000000	8593.38	84889.7	105943	128016	206887	235087	253486	54105.1
308000000000	8703.78	84551.7	106015	128186	207062	235026	253205	54167.3
309000000000	8686.92	84532.8	106120	128343	207185	235060	253320	54114.2
310000000000	8688.71	84676.1	106114	128544	207410	235236	253510	54141.3
311000000000	8686.99	84665.4	106026	128441	207524	235540	253768	54017.2
312000000000	8691.45	84780.5	106249	128703	207738	235531	253773	54076.1
313000000000	8683.85	84792	106246	128684	208064	235471	254078	54052.3
314000000000	8642.06	84938	106191	128705	208206	235640	254070	54113.5
315000000000	8714.84	84865.1	106143	128833	208139	235730	254006	54100.6
316000000000	8680.67	84885.2	106142	128676	208373	235728	254185	54021.9
317000000000	8692.74	84996.6	106106	128811	208592	235989	254382	54085.4
318000000000	8739	84848.1	106187	128905	208740	236088	254582	54183.2
319000000000	8666.22	84823.4	106333	129075	209012	236031	254557	54097.5
320000000000	8679.29	85282.5	106213	129064	209116	235967	254448	54107.7
321000000000	8687.02	84927.5	106560	129005	209415	236352	254780	54065.9
322000000000	8658.71	84842.7	106552	129267	209453	236588	254684	53961.8
323000000000	8652.79	84962.3	106419	129339	209756	236701	254863	54128.5
324000000000	8631.64	84876.5	106579	129256	209617	236788	255222	54101.8
325000000000	8657.69	84996.6	106624	129458	209929	236470	254871	54046.3
326000000000	8670.13	85182.6	106582	129417	210113	236970	254978	54108.2
327000000000	8653.56	85188.5	106374	129569	210313	236813	254812	54213.2
328000000000	8658.96	85182.6	106714	129651	210381	237149	255072	53964.8
329000000000	8617.6	85222.4	106679	129753	210567	237160	255446	53933.1
330000000000	8678.63	85020.2	106625	129656	210803	237515	255300	54123.1
331000000000	8670.62	85121	106795	129732	210988	237438	255456	54037.2
332000000000	8657.15	85100.1	106616	129696	211092	237468	255524	54175.4
333000000000	8692.21	85268.2	106658	129643	211287	237461	255644	54142.8
334000000000	8643.93	85297.4	106820	129923	211308	237452	256056	54151.5
335000000000	8647.11	85439.8	106614	130141	211679	237476	256141	54072.6
336000000000	8658.98	85354.6	106552	129794	211442	237765	255877	54121
337000000000	8716.16	85461.4	107004	130159	211962	237879	255960	54138.8
338000000000	8720.39	85488.2	107085	129968	211991	238080	255874	54166.6
339000000000	8673.92	85377.5	107092	130237	212377	237861	256260	54268.9
340000000000	8636.32	85333.1	106932	130334	212437	238332	256245	54187.7
341000000000	8654.41	85399.5	107000	130417	212240	238262	256516	54046.3
342000000000	8743.46	85434.7	106913	130416	212501	238281	256546	54138.4
343000000000	8668.31	85539.5	106990	130302	212862	238464	256526	54247.1
344000000000	8667.96	85463.8	107014	130626	212881	238555	256776	54110.9
345000000000	8667.61	85390.5	107058	130466	213183	238735	256684	54152.5
346000000000	8665.49	85627.7	107095	130502	213127	238861	256824	54111.7
347000000000	8684.13	85504.2	107197	130727	213145	238863	256974	54130
348000000000	8629.29	85488.3	107083	130731	213665	238968	256963	54174.8
349000000000	8628.71	85604.7	107185	130610	213630	238989	256978	54083.8
350000000000	8699.55	85655.2	107333	130937	213882	239156	257191	54181.7
351000000000	8594.59	85474.2	107153	130849	214004	239037	257422	54196
352000000000	8706.24	85475.7	107318	131114	214063	239301	257230	54183.1
353000000000	8638.04	85680.4	107153	131179	214280	239334	257446	53975.4
354000000000	8602.17	85646.2	107328	131161	214432	239409	257732	53888.7
355000000000	8615.23	85786	107221	131087	214457	239759	257707	54123.9
356000000000	8625.24	85794.9	107424	130861	214626	239683	257336	54032.7
357000000000	8642.86	85838.4	107278	131412	215039	239800	257759	54007.3
358000000000	8630.34	85749.6	107257	131261	214713	239872	257610	54038.4
359000000000	8622.73	85789.8	107437	131640	215367	239942	257743	54227.8
360000000000	8673.88	85690	107397	131286	215093	240091	258074	54109.6
361000000000	8651.12	85869.7	107459	131447	215548	239952	257706	54157
362000000000	8649.44	85869.4	107757	131316	215629	240271	258231	54040.9
363000000000	8697.57	85918.6	107504	131586	215860	240324	258114	54073.8
364000000000	8648.03	85894.4	107394	131716	215797	240350	258454	54202.5
365000000000	8639.75	85955.8	107442	131713	216064	240478	258308	54196.5
366000000000	8709.22	85845.7	107694	131564	216354	240458	258504	54166.9
367000000000	8694.2	86012.4	107556	131693	216431	240613	258308	54298.2
368000000000	8663.74	85933.6	107634	131829	216413	240638	258687	54162.1
369000000000	8662.7	85863.6	107667	131760	216630	240644	258632	54048.5
370000000000	8699.49	85900.7	107577	131947	216894	240734	258491	54142.7
371000000000	8692.15	85953.2	107830	131873	216859	240796	258962	54054.9
372000000000	8662.47	86137.5	107609	131874	217160	240707	259125	54080.5
373000000000	8612.43	85943.3	107746	131998	217310	241242	259268	53991.5
374000000000	8721.1	86141.5	107770	132236	217612	240987	259151	54023
375000000000	8745.68	85826.2	107807	132383	217620	241310	259054	54115.8
376000000000	8652.61	86184	107694	132089	217844	241216	259069	53977.3
377000000000	8683.02	86030.4	107879	132321	217954	241421	259158	54192.9
378000000000	8584.42	85996.5	107927	132491	217879	241565	259243	54131.5
379000000000	8689.57	86044.1	107768	132489	218133	241337	259515	54074.7
380000000000	8599.02	86082.4	107998	132426	218361	241723	259364	53905.3
381000000000	8627	86147	107916	132549	218291	241690	259711	53918.8
382000000000	8633.75	86242.8	107822	132598	218866	241649	259322	54191.3
383000000000	8631.29	86270	107904	132633	218563	241809	259896	54197
384000000000	8633.34	86285.5	107992	132628	218815	241834	259404	53966.1
385000000000	8683.5	86421.9	107969	132587	218912	241960	259658	54067
386000000000	8639.3	86215.9	107997	132820	219155	241674	259741	54138.5
387000000000	8651.5	86288.4	108192	132678	219235	242319	259990	53926.1
388000000000	8608.42	86173.5	108142	132976	219419	242212	259983	54112.4
389000000000	8664.61	86054.1	107784	132969	219600	242177	260265	53957.3
390000000000	8657.74	86112	107974	132930	219705	242240	260253	54016.7
391000000000	8686.38	86324.4	108312	133067	219695	242377	260292	54061.6
392000000000	8627.77	86314.2	108266	132905	220054	242117	260019	54017.4
393000000000	8663.76	86520.7	108192	133003	220017	242635	260362	54153.8
394000000000	8714.08	86312.1	108157	133448	220179	242608	260316	53991.4
395000000000	8598.64	86387.5	108190	133294	220139	242683	260755	54063.3
396000000000	8618.7	86426.8	108229	133382	220335	242494	260737	53962.4
397000000000	8661.19	86385.8	108164	133170	220763	243136	260903	53992.6
398000000000	8615.94	86444.7	108446	133110	220773	242874	260801	53973.9
399000000000	8613.08	86621.3	108280	133306	220747	242557	261164	54031.5
400000000000	8636.05	86517.4	108259	133531	221019	243191	260724	54029
401000000000	8685.04	86540.2	108384	133436	221138	243043	260912	54018
402000000000	8655.28	86455.9	108366	133586	221390	243135	261280	53973.1
403000000000	8664.3	86688.8	108346	133687	221473	243051	261292	54251.4
404000000000	8578.43	86353.5	108499	133605	221547	243319	261074	54107.9
405000000000	8577.89	86619	108453	133843	221813	243503	261152	54069.5
406000000000	8632.29	86486.9	108410	133809	221777	243364	261381	54092.2
407000000000	8617.68	86521.4	108526	133878	222095	243608	261216	54104.3
408000000000	8717.67	86393.7	108540	133907	221712	243456	261501	53898.5
409000000000	8645.93	86535.6	108651	133964	222190	243655	261448	54029.6
410000000000	8576.3	86602	108498	133953	222557	243908	261488	54103.7
411000000000	8659.02	86649.2	108448	133860	222386	243674	261876	54048.6
412000000000	8623.13	86894	108834	134173	222430	243477	261512	54224.6
413000000000	8661.82	86843.7	108490	134086	222706	243637	261835	54097.6
414000000000	8606.85	86759	108786	133889	222861	243880	261640	54075.5
415000000000	8573.5	86774	108684	134297	222993	244290	261946	54185.9
416000000000	8628.57	86888.4	108539	134323	222950	243907	261946	54011.9
417000000000	8592.47	86690.6	108800	134443	223516	244241	261836	54000.1
418000000000	8625.91	86575.1	108846	134511	222992	243780	261931	54158.9
419000000000	8718.12	87008.4	108778	134488	223650	244138	262109	54188.4
420000000000	8680.71	86596.8	108714	134440	223728	244314	262170	54120.3
421000000000	8652.2	86848.6	108877	134517	223969	244298	262112	54039.1
422000000000	8671.3	86867	108980	134597	223892	244415	262508	54059.5
423000000000	8620.34	86921.9	108888	134680	224074	244560	262168	54053.1
424000000000	8676.72	86808	109066	134481	224296	244675	262582	53974.2
425000000000	8662.04	87115.8	109056	134630	224307	244349	262777	54084.3
426000000000	8623.93	86995.7	108961	134645	224585	244881	262376	53905.4
427000000000	8651.14	86814.5	108816	134864	224375	244673	262480	54043.4
428000000000	8600.22	86918.5	108847	134861	224726	245102	262675	54193.3
429000000000	8594.37	86999.9	108983	134646	224866	245138	262458	54042.9
430000000000	8614.58	86899	108890	135021	224721	244967	262558	54035.8
431000000000	8647.61	86967.9	109068	135055	225484	245223	263097	54001.5
432000000000	8634.28	86890.1	109100	134990	225427	245203	262948	54038.7
433000000000	8610.48	86861	109073	135286	225447	245238	262783	54060
434000000000	8596.92	87090.7	109183	135095	225519	245046	262844	53948.1
435000000000	8561.33	86960.5	109000	135298	225727	245308	262876	54046.6
436000000000	8582.93	87000.3	109243	135209	225754	245509	263155	54013.9
437000000000	8647.4	86956.6	109072	135197	225883	245250	263137	54025.3
438000000000	8676.63	87015.8	109194	135285	226024	245486	263589	54101.2
439000000000	8613.86	87035.3	109409	135327	226102	245366	263760	54106
440000000000	8625.43	87083.1	109178	135244	226305	245617	263162	54010.2
441000000000	8644.22	86986.3	109091	135507	226383	245301	263274	53858.7
442000000000	8673.85	86944.8	109256	135411	226289	245798	263518	53945.5
443000000000	8622.57	87315.3	109311	135388	226507	245697	263297	54022.7
444000000000	8609.96	87130.6	109249	135610	226581	245658	263698	54064.6
445000000000	8654.57	87192.8	109339	135519	226657	245769	263841	54204.6
446000000000	8695.35	87194.6	109333	135635	226718	245881	263710	54058.1
447000000000	8635.87	87274.5	109464	135471	227146	245905	263637	54149.5
448000000000	8627.88	87277.2	109579	135868	227040	246169	263835	54129.7
449000000000	8614.79	87341.3	109488	135775	227581	245779	263974	54130
450000000000	8640.17	87100.5	109686	135762	227681	246289	263842	54170.9
451000000000	8655.75	87213.8	109264	135759	227780	246054	264062	53954.5
452000000000	8603.54	87041.5	109527	136177	227857	246232	264090	54100.4
453000000000	8645.01	87297.2	109312	135957	227638	246330	263960	54008.2
454000000000	8640.51	87371.9	109741	135675	227927	246276	264169	53991.8
455000000000	8670.23	87144.2	109562	135936	228091	246364	264107	53991.8
456000000000	8619.71	87398.1	109725	136104	227886	246218	264195	53979.4
457000000000	8639.86	87292.4	109594	136060	228484	246222	264435	54003.3
458000000000	8625.63	87365	109588	136258	228290	246840	264370	54035.5
459000000000	8619.54	87431.9	109741	136043	228410	246499	264539	54044.4
460000000000	8587.17	87282.8	109824	136495	228803	246816	264476	54082.8
461000000000	8594.88	87295.7	109728	136406	228654	246751	264822	53966.2
462000000000	8595.48	87450.9	109877	136390	229137	246523	264406	54130.2
463000000000	8652.21	87379.8	109851	136422	229146	246769	264435	54072.8
464000000000	8644.57	87407.2	109743	136552	228911	246954	264810	54102.8
465000000000	8645.79	87500.2	109857	136463	229562	246867	264795	53913.2
466000000000	8696.92	87359.2	109933	136501	229474	247019	264659	53918.6
467000000000	8608.44	87543.4	109789	136318	229744	247099	264935	53817.8
468000000000	8598.8	87525	109952	136518	229633	246694	264837	54030.3
469000000000	8614.75	87534.1	109938	136809	229712	247359	264986	54029.2
470000000000	8614.92	87572.8	109975	136936	229944	246945	265267	53808.4
471000000000	8627.58	87473.7	109713	136691	229797	247037	265166	53944.7
472000000000	8618.58	87580.1	109934	137056	230490	247374	265062	54070.5
473000000000	8652.27	87459.6	109874	136884	230155	247596	265068	54004.2
474000000000	8650.97	87616	109904	137023	230233	247370	265300	54131.6
475000000000	8660.17	87495.9	110159	136991	230354	247735	265220	54016.5
476000000000	8683.42	87742.4	109894	137220	230644	247490	265210	54093.3
477000000000	8738.01	87718.1	110138	137065	230782	247750	265354	53955.3
478000000000	8662.51	87617.3	110224	137040	230829	247664	265121	54025.4
479000000000	8634.25	87521	110125	137226	231150	247753	265632	54080.6
480000000000	8624.34	87572.7	109985	137061	231004	248033	265570	53907
481000000000	8643.33	87746.4	110346	137234	230985	247901	265417	54141.3
482000000000	8687.42	87675.8	110172	137323	231443	247859	265550	54044.9
483000000000	8605.26	87617	110469	137267	231445	247589	265728	53909.2
484000000000	8591.3	87512	110280	137516	231765	248045	265839	53935.4
485000000000	8646.86	87965.2	110253	137481	231737	247931	265710	54039.3
486000000000	8604.57	87578.4	110400	137647	231806	247850	265717	53933.7
487000000000	8590.61	87544.3	110267	137447	232087	248069	265946	54007.1
488000000000	8600.93	87697.6	110588	137469	231803	248002	265861	53953.5
489000000000	8581.34	87710.7	110516	137704	232174	248068	266069	54030.3
490000000000	8581.79	87645	110375	137287	232298	248219	265902	53980.3
491000000000	8592.72	87737.4	110445	137740	232061	247912	266210	53944.9
492000000000	8607	87778.9	110349	137869	232321	248306	266115	53823.5
493000000000	8644.16	87703.4	110620	137780	232626	248312	266288	54106.5
494000000000	8603.87	87814.4	110669	137592	232522	248223	266161	54099.9
495000000000	8624.08	87783.5	110563	137597	232604	248276	266422	54059.3
496000000000	8631.96	87686.4	110614	137883	232733	248354	266197	54037.9
497000000000	8648.6	87847.7	110348	137964	232823	248639	266470	54083.1
498000000000	8580.22	87884.4	110597	138138	232980	248361	266321	53965.6
499000000000	8695.36	87891.7	110535	138100	233218	248718	266238	53868.9
500000000000	8612.03	87800.1	110868	138036	233282	248662	266377	54062.2
501000000000	8546.24	87758.1	110352	138162	233174	248473	266368	54035.6
502000000000	8577.23	87897.6	110822	138237	233048	248773	266487	54122.4
503000000000	8588.79	87797.3	110740	138125	233785	248573	266586	53971.9
504000000000	8654.21	88025.5	110762	138261	233807	249074	266729	54037.8
505000000000	8627.59	87848	110975	138200	234037	248935	266760	53908.9
506000000000	8627.32	87998.1	110710	138235	233644	249225	266605	54007.1
507000000000	8657.41	88097.4	110786	138163	234121	248966	266916	53828
508000000000	8579.66	87817.6	110982	138468	233860	248755	266834	53921.3
509000000000	8628.46	88054.9	111013	138537	234310	249049	267131	54021
510000000000	8643.46	87897.6	110979	138420	234340	249286	266804	54119
511000000000	8669.51	88152.5	111051	138674	234439	249152	267158	53956
512000000000	8559.47	88102.9	111082	138563	234714	249193	267390	54086.4
513000000000	8619.75	88009.9	110931	138459	234758	249046	266845	53935.7
514000000000	8599.58	87962.3	111175	138700	234669	249076	267147	53944.3
515000000000	8613.44	87929.1	111110	138514	234699	249489	267047	54125.4
516000000000	8587.74	87989.3	111042	138707	234913	249487	267213	54029.3
517000000000	8668.47	87946.5	111102	138736	235128	249327	267116	53834.8
518000000000	8656.46	88138.8	111112	138894	235248	249196	267491	54013.9
519000000000	8632.42	88072.3	111188	138611	235112	249668	267426	53955
520000000000	8589.19	88074.8	111098	138746	235262	249473	267322	54001.5
521000000000	8637.35	88145	111294	138827	235552	249369	267529	53972.7
522000000000	8625.3	87936.6	111345	139047	235542	249503	267248	53841.9
523000000000	8671.93	88148.7	111202	138903	235706	249602	267266	54107.9
524000000000	8636.21	88244.3	111283	139127	235848	249500	267544	53932.8
525000000000	8606.33	88075.9	111323	139061	236058	249653	267368	53811
526000000000	8574.96	88199.2	111378	139056	236115	249705	267423	54004.4
527000000000	8630.43	88283.6	111168	139236	236072	249805	267342	53931.8
528000000000	8644.97	88120.4	111368	139365	236265	249840	267420	54053.7
529000000000	8563.28	88327.1	111457	139332	236335	249758	268098	53944.9
530000000000	8644.71	88153.3	111521	139296	236424	249825	267931	54040.2
531000000000	8611.67	88145.3	111433	139510	236535	250068	267936	54088.6
532000000000	8585.04	88218.9	111585	139302	236432	249892	267884	54091.9
533000000000	8653.55	88147.1	111524	139466	236808	249956	267982	53857.9
534000000000	8623.47	88242.7	111498	139441	236453	250233	267797	54084.8
535000000000	8587.85	88301.5	111670	139413	236966	250220	267890	54022
536000000000	8623.85	88125.7	111878	139500	237354	249910	267866	53997.3
537000000000	8597.32	88382.7	111957	139280	236910	250043	268160	53924.8
538000000000	8638.78	88294.7	111768	139624	237065	250129	268236	53982
539000000000	8635.12	88606.6	111838	139508	237333	250107	267989	53906
540000000000	8572.04	88196.4	111782	139735	237321	250129	268020	53844.1
541000000000	8668.88	88433.1	111904	139983	237285	250437	268294	54061.2
542000000000	8588.05	88363.7	112011	139671	237566	250296	268268	54013.4
543000000000	8634.91	88211.7	111966	140004	237474	250273	268403	54024.6
544000000000	8605.85	88477.6	112042	139863	237609	250435	268217	53863.3
545000000000	8616.53	88364.4	112049	139942	237970	250583	268454	53987.2
546000000000	8657.13	88284.4	112234	140253	238061	250795	268214	53922.3
547000000000	8569	88427.2	112318	139885	238176	250417	268606	53825.8
548000000000	8593.22	88325.5	112115	140120	238167	250584	268364	53895.2
549000000000	8567.96	88431.4	112302	140085	238247	250647	268394	53754.9
550000000000	8611	88237.7	112287	140017	238168	250744	268443	54007.1
551000000000	8701.02	88477	111956	139804	238480	250629	268806	53969.5
552000000000	8573.93	88551.5	112289	140219	238754	250455	268922	54015
553000000000	8618.06	88355.4	112184	140244	238706	250771	268471	53957.9
554000000000	8649.69	88530.3	112397	140265	238870	250712	268680	53983.8
555000000000	8667.87	88690.8	112420	140357	238710	250519	268512	53752.6
556000000000	8559.85	88413.3	112392	140477	238831	250842	268892	53991.8
557000000000	8548.31	88292.2	112439	140387	239545	251059	268847	53978.8
558000000000	8581.29	88581.8	112403	140431	239087	250663	268866	53915.9
559000000000	8645.84	88479.5	112398	140453	239277	250968	268683	54010.4
560000000000	8575.47	88650.8	112344	140571	239296	250999	268872	53906.1
561000000000	8609.77	88714.6	112469	140200	239456	250872	268950	53943.2
562000000000	8646.52	88434.3	112502	140572	239365	251011	269112	54007.6
563000000000	8575.78	88695	112527	140623	239643	250762	268976	53982.1
564000000000	8626.28	88529.4	112461	140664	239757	250963	269147	53882.2
565000000000	8638.54	88685.2	112848	140901	240080	250865	269195	53907.4
566000000000	8589.94	88759.1	112857	140748	240015	251060	269256	53917.7
567000000000	8635.87	88461	112679	140783	240310	251195	268856	53891.6
568000000000	8606.41	88557.6	112603	140687	240050	251128	269266	54047
569000000000	8662.54	88759.9	112645	141055	240439	251112	269345	53942
570000000000	8631.49	88431.8	112852	141078	240441	251413	269302	54005.7
571000000000	8631.26	88705.9	112722	140971	240637	251569	269360	53941.4
572000000000	8581.33	88521.1	112816	141100	241121	251627	269466	54026.7
573000000000	8598.14	88760.6	112859	140913	240637	251114	269481	53950.2
574000000000	8643.79	88569.8	113042	141148	241063	251814	269675	54082.7
575000000000	8595.08	88755.5	112793	141020	240844	251300	269696	53945
576000000000	8544.98	88876.3	113042	140954	241077	251390	269695	53944.1
577000000000	8640.12	88964.5	113059	141103	241355	251581	269424	54058.9
578000000000	8600.08	88851.2	113087	141138	241223	251367	269455	53964.3
579000000000	8590.69	88734.5	113231	141364	241335	251569	269644	54032.6
580000000000	8578.34	88747.4	113235	141226	241674	251498	269780	54038.6
581000000000	8572.54	88816.5	113251	141384	241710	251657	269742	53890
582000000000	8594.8	88796.9	113295	141374	241680	251732	269624	53945.4
583000000000	8590.06	88562.2	113130	141368	241621	251843	269940	53896.7
584000000000	8586.2	88855.6	113286	141466	241886	251666	269985	53976.3
585000000000	8612.51	88774.1	113027	141521	241857	252008	270229	53989.7
586000000000	8617.66	88575	113323	141642	242270	251895	270354	53968
587000000000	8600.56	88751.5	113442	141811	242075	252136	270014	53990.9
588000000000	8614.36	88817.6	113327	141896	242325	251974	270018	54150.1
589000000000	8623.99	88897	113152	141612	242350	251954	269963	54024.6
590000000000	8619.95	88987	113422	141777	242097	252341	269979	53972.4
591000000000	8630.65	88764.7	113408	142151	242416	252145	270117	54055.3
592000000000	8688.9	88935.9	113415	141768	242387	251905	270306	53960.8
593000000000	8558.17	88743.7	113657	141946	242711	252058	270007	54032.7
594000000000	8620.57	89035.1	113628	141934	242792	252520	270122	54010.1
595000000000	8609.84	88905.2	113873	141976	242796	252157	270187	53825.5
596000000000	8576.21	88962.6	113856	142051	242934	252566	270117	53996.9
597000000000	8553.48	89038.8	113426	142148	242809	252311	270403	53805.4
598000000000	8606.6	89045.2	113647	142184	242845	252583	270504	53885.7
599000000000	8548.07	89062.1	113850	142040	243264	252485	270326	53971.6
600000000000	8617.54	88952.5	113720	142308	243242	252256	270646	53874.9

## Sheet: Sheet1
Time(s)	DMPC only	1:8=DMPG:DMPC	1.5:8=DMPG:DMPC	2:8=DMPG:DMPC	3:8=DMPG:DMPC	3.5:8=DMPG:DMPC	4:8=DMPG:DMPC	4:8=POPS:DMPC										Time(s)	DMPC only	1:8=DMPG:DMPC	1.5:8=DMPG:DMPC	2:8=DMPG:DMPC	3:8=DMPG:DMPC	3.5:8=DMPG:DMPC	4:8=DMPG:DMPC	4:8=POPS:DMPC
0	8882.13	60545.4	70137.1	80432.4	112154	136285	153198	52800.3										0	88.8213	605.454	701.371	804.324	1121.54	1362.85	1531.98	528.003
1	8700.62	60948.9	70701.3	81010.5	113024	137188	154472	52866.3										1	87.0062	609.489	707.013	810.105	1130.24	1371.88	1544.72	528.663
2	8782.7	61166.7	71098.6	81702.2	113843	138074	155331	52910.8										2	87.827	611.667	710.986	817.022	1138.43	1380.74	1553.31	529.108
3	8821.43	61549.9	71574	82051.6	114735	139206	156306	52662.8										3	88.2143	615.499	715.74	820.516	1147.35	1392.06	1563.06	526.628
4	8781.41	61864.2	72249.7	82695.6	115428	140289	158026	52812.3										4	87.8141	618.642	722.497	826.956	1154.28	1402.89	1580.26	528.123
5	8808.37	62228.8	72598.9	83234.3	116137	141717	158707	52822.4										5	88.0837	622.288	725.989	832.343	1161.37	1417.17	1587.07	528.224
6	8779.65	62474.6	73251.9	83660.5	116969	142532	159791	52842.3										6	87.7965	624.746	732.519	836.605	1169.69	1425.32	1597.91	528.423
7	8793.77	62841.4	73568.4	84200.5	117753	143601	161082	52960.1										7	87.9377	628.414	735.684	842.005	1177.53	1436.01	1610.82	529.601
8	8751.88	63045.8	73997.1	84709.3	118593	144513	162032	52960										8	87.5188	630.458	739.971	847.093	1185.93	1445.13	1620.32	529.6
9	8724.72	63411.1	74323.2	85286.5	119018	145535	163266	53016.3										9	87.2472	634.111	743.232	852.865	1190.18	1455.35	1632.66	530.163
10	8787.56	63781.1	74656.6	85733.5	119818	146700	164106	53042.9										10	87.8756	637.811	746.566	857.335	1198.18	1467	1641.06	530.429
11	8697.09	63932.3	75142.5	86094.4	120583	147257	164959	52932.2										11	86.9709	639.323	751.425	860.944	1205.83	1472.57	1649.59	529.322
12	8772.19	64059.5	75463.8	86713.2	121109	148294	166129	53017										12	87.7219	640.595	754.638	867.133	1211.09	1482.94	1661.29	530.17
13	8817.91	64434.8	75801.5	87082.1	121840	149187	166961	53027.3										13	88.1791	644.347	758.015	870.821	1218.4	1491.87	1669.61	530.273
14	8725.71	64556.6	76228.4	87494.7	122604	149987	167946	53064.9										14	87.2571	645.566	762.284	874.947	1226.04	1499.87	1679.46	530.649
15	8749.88	64909.3	76634.3	87654.2	123215	150820	168480	53217.8										15	87.4988	649.093	766.343	876.542	1232.15	1508.2	1684.8	532.178
16	8766.17	65191.3	76817.4	88324.9	123844	151859	169576	53012.4										16	87.6617	651.913	768.174	883.249	1238.44	1518.59	1695.76	530.124
17	8712.18	65254.8	77385.4	88669.9	124480	152583	170410	53068.1										17	87.1218	652.548	773.854	886.699	1244.8	1525.83	1704.1	530.681
18	8695.14	65661.9	77567	89258.3	125228	153307	171415	53141.3										18	86.9514	656.619	775.67	892.583	1252.28	1533.07	1714.15	531.413
19	8660.23	65880.6	77880.5	89363.7	125791	154123	172077	53213.5										19	86.6023	658.806	778.805	893.637	1257.91	1541.23	1720.77	532.135
20	8737.29	66043.9	78255.8	89757.4	126288	154944	173068	53226.7										20	87.3729	660.439	782.558	897.574	1262.88	1549.44	1730.68	532.267
21	8703.35	66294.9	78306.6	90065.5	126800	155608	173793	53068.9										21	87.0335	662.949	783.066	900.655	1268	1556.08	1737.93	530.689
22	8799.5	66333.8	78856.2	90569.4	127637	156515	174275	53054.7										22	87.995	663.338	788.562	905.694	1276.37	1565.15	1742.75	530.547
23	8780.13	66599.5	79178.2	90800	128100	157132	175184	53170										23	87.8013	665.995	791.782	908	1281	1571.32	1751.84	531.7
24	8724.17	66853.7	79467.5	91094.5	128758	157997	175964	53142.5										24	87.2417	668.537	794.675	910.945	1287.58	1579.97	1759.64	531.425
25	8718.98	67208.5	79776.3	91681	129019	158627	176861	53332.1										25	87.1898	672.085	797.763	916.81	1290.19	1586.27	1768.61	533.321
26	8710.53	67294.6	79989.7	91937.8	129649	159332	177295	53384.5										26	87.1053	672.946	799.897	919.378	1296.49	1593.32	1772.95	533.845
27	8776.51	67335.6	80342.4	92064.1	130178	159970	178200	53312.7										27	87.7651	673.356	803.424	920.641	1301.78	1599.7	1782	533.127
28	8710.14	67640.2	80671.7	92580.2	130711	160674	178888	53179.5										28	87.1014	676.402	806.717	925.802	1307.11	1606.74	1788.88	531.795
29	8688.38	67809.6	81044.2	93027.9	131188	161600	179512	53278.4										29	86.8838	678.096	810.442	930.279	1311.88	1616	1795.12	532.784
30	8715.86	67960.8	81002.8	93170.6	131569	162128	180244	53263.4										30	87.1586	679.608	810.028	931.706	1315.69	1621.28	1802.44	532.634
31	8745.26	68243.5	81249.8	93368.3	132305	162587	180640	53193.8										31	87.4526	682.435	812.498	933.683	1323.05	1625.87	1806.4	531.938
32	8751.08	68222.8	81485.7	93825.9	132705	163480	181308	53261.3										32	87.5108	682.228	814.857	938.259	1327.05	1634.8	1813.08	532.613
33	8678.3	68452.7	81834	94038.8	133237	164114	182457	53142.2										33	86.783	684.527	818.34	940.388	1332.37	1641.14	1824.57	531.422
34	8662.08	68650.5	81958.4	94420.9	133594	164851	182898	53383.3										34	86.6208	686.505	819.584	944.209	1335.94	1648.51	1828.98	533.833
35	8670.04	68858.6	82496.3	94656.7	133798	165259	183433	53436										35	86.7004	688.586	824.963	946.567	1337.98	1652.59	1834.33	534.36
36	8679.95	69072.8	82533.9	95038.8	134637	165898	184066	53452.3										36	86.7995	690.728	825.339	950.388	1346.37	1658.98	1840.66	534.523
37	8727.15	69335.4	82778.5	95263.4	134911	166264	184785	53470.5										37	87.2715	693.354	827.785	952.634	1349.11	1662.64	1847.85	534.705
38	8681.26	69283.6	83213.6	95542.8	135422	166954	185731	53452.1										38	86.8126	692.836	832.136	955.428	1354.22	1669.54	1857.31	534.521
39	8660.86	69391.2	83336.4	95699.2	136068	167693	185989	53257.8										39	86.6086	693.912	833.364	956.992	1360.68	1676.93	1859.89	532.578
40	8668.4	69543.6	83449.9	96148.1	136592	168294	186591	53487										40	86.684	695.436	834.499	961.481	1365.92	1682.94	1865.91	534.87
41	8685.31	69730.6	83858.8	96517.4	136994	168496	187403	53355.6										41	86.8531	697.306	838.587	965.174	1369.94	1684.96	1874.03	533.556
42	8748.87	69972.5	83895.7	96514.4	137322	169464	187877	53405.2										42	87.4887	699.725	838.957	965.144	1373.22	1694.64	1878.77	534.052
43	8730.04	70089.1	84208.7	96693.6	137792	169978	188306	53573										43	87.3004	700.891	842.087	966.936	1377.92	1699.78	1883.06	535.73
44	8698.72	69987.6	84261.8	97158.5	138149	170484	189618	53551										44	86.9872	699.876	842.618	971.585	1381.49	1704.84	1896.17	535.51
45	8665.87	70261.5	84516.6	97443.2	138741	171297	190276	53455.3										45	86.6587	702.615	845.166	974.432	1387.41	1712.97	1902.76	534.553
46	8699.56	70348.5	84886.9	97501.6	139056	171633	190848	53481.7										46	86.9956	703.485	848.869	975.016	1390.56	1716.33	1908.48	534.817
47	8658.77	70701.7	85038.6	97658.5	139651	172295	191353	53422.4										47	86.5877	707.017	850.386	976.585	1396.51	1722.95	1913.53	534.224
48	8700.96	70665	85230.5	97897.7	140102	172679	191783	53655.8										48	87.0096	706.65	852.305	978.977	1401.02	1726.79	1917.83	536.558
49	8666.79	70903.2	85401	98417.8	140247	173334	192519	53574										49	86.6679	709.032	854.01	984.178	1402.47	1733.35	1925.19	535.74
50	8708.75	71125.6	85546.2	98653.6	140981	173652	192952	53626.7										50	87.0875	711.256	855.462	986.536	1409.81	1736.52	1929.52	536.267
51	8660.91	71093.4	85783.6	98842.8	141284	174240	193325	53510.2										51	86.6091	710.934	857.836	988.428	1412.84	1742.4	1933.25	535.102
52	8719.07	71170.4	85956.4	99133.7	141683	174650	193938	53467.6										52	87.1907	711.704	859.564	991.337	1416.83	1746.5	1939.38	534.676
53	8711.97	71390.8	86131.1	99009.5	142155	175127	194546	53559.9										53	87.1197	713.908	861.311	990.095	1421.55	1751.27	1945.46	535.599
54	8688.53	71307	86400.7	99561.5	142514	175945	194897	53731.6										54	86.8853	713.07	864.007	995.615	1425.14	1759.45	1948.97	537.316
55	8658.66	71647.5	86572.4	99757.4	142707	176267	195308	53433.6										55	86.5866	716.475	865.724	997.574	1427.07	1762.67	1953.08	534.336
56	8675.69	71589.8	86533.5	99990	143147	176715	196042	53576.5										56	86.7569	715.898	865.335	999.9	1431.47	1767.15	1960.42	535.765
57	8650.52	71711.3	86913.4	100179	143654	177098	196446	53583.5										57	86.5052	717.113	869.134	1001.79	1436.54	1770.98	1964.46	535.835
58	8702.11	71865.9	87251.3	100493	144149	177903	197060	53634.2										58	87.0211	718.659	872.513	1004.93	1441.49	1779.03	1970.6	536.342
59	8673.97	71975.9	87170.9	100745	144381	178216	197822	53813.4										59	86.7397	719.759	871.709	1007.45	1443.81	1782.16	1978.22	538.134
60	8679.16	71987.7	87455.4	100728	144806	178829	197958	53700.8										60	86.7916	719.877	874.554	1007.28	1448.06	1788.29	1979.58	537.008
61	8693.65	72343.6	87591.9	101070	145039	179329	198230	53770.1										61	86.9365	723.436	875.919	1010.7	1450.39	1793.29	1982.3	537.701
62	8658.42	72434.5	87708.6	101003	145532	179518	199092	53629.9										62	86.5842	724.345	877.086	1010.03	1455.32	1795.18	1990.92	536.299
63	8682.23	72513	88039.2	101509	146062	179872	199245	53728.6										63	86.8223	725.13	880.392	1015.09	1460.62	1798.72	1992.45	537.286
64	8692.51	72543.4	87862.1	101798	146255	180551	199681	53666.3										64	86.9251	725.434	878.621	1017.98	1462.55	1805.51	1996.81	536.663
65	8643.77	72584	88187.1	101709	146677	181007	200243	53659										65	86.4377	725.84	881.871	1017.09	1466.77	1810.07	2002.43	536.59
66	8633.85	72841.1	88583.8	101990	147291	181168	200546	53743.8										66	86.3385	728.411	885.838	1019.9	1472.91	1811.68	2005.46	537.438
67	8667.38	72953.4	88582	102569	147376	181854	201081	53664										67	86.6738	729.534	885.82	1025.69	1473.76	1818.54	2010.81	536.64
68	8650.72	72940.5	88895	102581	147921	182130	201937	53651.2										68	86.5072	729.405	888.95	1025.81	1479.21	1821.3	2019.37	536.512
69	8678.96	73203.4	89038.8	102706	148049	182752	201740	53772.3										69	86.7896	732.034	890.388	1027.06	1480.49	1827.52	2017.4	537.723
70	8726.87	73211.5	88958.6	102943	148502	183176	202677	53739.3										70	87.2687	732.115	889.586	1029.43	1485.02	1831.76	2026.77	537.393
71	8707.5	73379.3	89225.3	103111	148952	183560	202884	53922.2										71	87.075	733.793	892.253	1031.11	1489.52	1835.6	2028.84	539.222
72	8646.04	73461.4	89325.9	103328	149058	183956	203542	53660										72	86.4604	734.614	893.259	1033.28	1490.58	1839.56	2035.42	536.6
73	8716.09	73688.9	89618.9	103478	149691	184522	203910	53835.2										73	87.1609	736.889	896.189	1034.78	1496.91	1845.22	2039.1	538.352
74	8688.09	73731	89769	103649	149820	185069	204498	53869										74	86.8809	737.31	897.69	1036.49	1498.2	1850.69	2044.98	538.69
75	8743.53	73692.1	89985.5	104183	150295	184946	204625	53806.1										75	87.4353	736.921	899.855	1041.83	1502.95	1849.46	2046.25	538.061
76	8678.2	73799.5	89970.1	104017	150773	185653	205280	53748.2										76	86.782	737.995	899.701	1040.17	1507.73	1856.53	2052.8	537.482
77	8657.58	73861	90205.1	104212	151226	186123	205294	53841.7										77	86.5758	738.61	902.051	1042.12	1512.26	1861.23	2052.94	538.417
78	8699.94	74032.7	90342.9	104309	151532	186423	205908	53804.2										78	86.9994	740.327	903.429	1043.09	1515.32	1864.23	2059.08	538.042
79	8665.48	73853.1	90272.7	104915	151740	186780	206321	53777.2										79	86.6548	738.531	902.727	1049.15	1517.4	1867.8	2063.21	537.772
80	8656.01	74197.9	90784.1	104743	152132	187271	206391	53934.1										80	86.5601	741.979	907.841	1047.43	1521.32	1872.71	2063.91	539.341
81	8643.06	74286.7	90626.9	104963	152661	187692	207145	53915.6										81	86.4306	742.867	906.269	1049.63	1526.61	1876.92	2071.45	539.156
82	8724.89	74233.4	90875.8	105178	152696	188242	207612	53802.8										82	87.2489	742.334	908.758	1051.78	1526.96	1882.42	2076.12	538.028
83	8661.83	74384.8	91017.7	105507	153063	188255	208003	53707.2										83	86.6183	743.848	910.177	1055.07	1530.63	1882.55	2080.03	537.072
84	8676.31	74346.4	91141.3	105350	153445	188757	208371	53995										84	86.7631	743.464	911.413	1053.5	1534.45	1887.57	2083.71	539.95
85	8625.98	74636.6	91021.3	105635	153720	189271	208847	53963.2										85	86.2598	746.366	910.213	1056.35	1537.2	1892.71	2088.47	539.632
86	8639.47	74654.4	91366	105816	154204	189490	208892	53971										86	86.3947	746.544	913.66	1058.16	1542.04	1894.9	2088.92	539.71
87	8639.05	74657.8	91337.1	106230	154505	190041	209548	53923.3										87	86.3905	746.578	913.371	1062.3	1545.05	1900.41	2095.48	539.233
88	8670.55	74706.5	91512.8	106340	154913	190411	209656	53683.2										88	86.7055	747.065	915.128	1063.4	1549.13	1904.11	2096.56	536.832
89	8707.83	74952.9	91774.6	106565	155068	190913	210053	53789.3										89	87.0783	749.529	917.746	1065.65	1550.68	1909.13	2100.53	537.893
90	8685.97	75082.9	91719.7	106733	155519	191256	210617	53894.2										90	86.8597	750.829	917.197	1067.33	1555.19	1912.57	2106.17	538.942
91	8671.4	75138.6	92033.7	106961	155915	191483	210943	53869.4										91	86.714	751.386	920.337	1069.61	1559.15	1914.83	2109.43	538.694
92	8673.62	75135.7	92145.8	106970	155914	191642	211397	53687										92	86.7362	751.357	921.458	1069.7	1559.14	1916.42	2113.97	536.87
93	8647.83	75255.9	92094.1	107069	156391	192170	211688	53891.1										93	86.4783	752.559	920.941	1070.69	1563.91	1921.7	2116.88	538.911
94	8653.91	75365.5	92284.1	107296	157145	192435	212019	53951.5										94	86.5391	753.655	922.841	1072.96	1571.45	1924.35	2120.19	539.515
95	8664.57	75416.1	92468.3	107249	157261	192926	212291	53810.2										95	86.6457	754.161	924.683	1072.49	1572.61	1929.26	2122.91	538.102
96	8678.85	75417.9	92630.1	107534	157401	193321	212800	53951.1										96	86.7885	754.179	926.301	1075.34	1574.01	1933.21	2128	539.511
97	8714.92	75566.5	92925.8	107554	157731	193708	213165	53907.4										97	87.1492	755.665	929.258	1075.54	1577.31	1937.08	2131.65	539.074
98	8683.63	75577.9	92932.1	107624	158095	193974	213130	53762.1										98	86.8363	755.779	929.321	1076.24	1580.95	1939.74	2131.3	537.621
99	8680.78	75825.9	92868	108083	158367	194365	213885	53915.5										99	86.8078	758.259	928.68	1080.83	1583.67	1943.65	2138.85	539.155
100	8626.71	75726.5	93116	108185	158833	194508	213984	53895.8										100	86.2671	757.265	931.16	1081.85	1588.33	1945.08	2139.84	538.958
101	8713.46	76043.9	93179.2	108466	159052	194833	214614	53885.6										101	87.1346	760.439	931.792	1084.66	1590.52	1948.33	2146.14	538.856
102	8679.43	76027.3	93531	108314	159711	195126	214774	53973.5										102	86.7943	760.273	935.31	1083.14	1597.11	1951.26	2147.74	539.735
103	8721.37	76180.3	93315.8	108631	159850	195465	215273	54005.4										103	87.2137	761.803	933.158	1086.31	1598.5	1954.65	2152.73	540.054
104	8663.6	76119.5	93638	108944	160154	195720	215674	53944.7										104	86.636	761.195	936.38	1089.44	1601.54	1957.2	2156.74	539.447
105	8682.15	76287.7	93800.2	109001	160362	196446	215716	53944										105	86.8215	762.877	938.002	1090.01	1603.62	1964.46	2157.16	539.44
106	8727.43	76324	93701.9	109087	160698	196469	216060	53963.6										106	87.2743	763.24	937.019	1090.87	1606.98	1964.69	2160.6	539.636
107	8669.36	76396.6	93853.7	109147	160821	196840	216215	54094.4										107	86.6936	763.966	938.537	1091.47	1608.21	1968.4	2162.15	540.944
108	8697.18	76553.6	93937.9	109387	161211	197308	216756	53910.6										108	86.9718	765.536	939.379	1093.87	1612.11	1973.08	2167.56	539.106
109	8721.37	76475.3	94103	109396	161495	197461	216884	53884.6										109	87.2137	764.753	941.03	1093.96	1614.95	1974.61	2168.84	538.846
110	8714.23	76643.5	94167.1	109658	161824	197766	217597	54026.8										110	87.1423	766.435	941.671	1096.58	1618.24	1977.66	2175.97	540.268
111	8634.35	76726.3	94376.2	109693	162255	198291	217852	53946.2										111	86.3435	767.263	943.762	1096.93	1622.55	1982.91	2178.53	539.462
112	8693.02	76758.3	94446.8	110177	162546	198444	218226	53953.1										112	86.9302	767.583	944.468	1101.77	1625.46	1984.44	2182.26	539.531
113	8688.6	76912.9	94688.2	110139	162990	198865	218710	53888.9										113	86.886	769.129	946.882	1101.39	1629.9	1988.65	2187.1	538.889
114	8737.42	76934.6	94715.1	110257	163156	199177	219089	53975.4										114	87.3742	769.346	947.151	1102.57	1631.56	1991.77	2190.89	539.754
115	8726.89	76939.8	94835.5	110453	163517	199304	219371	54004.2										115	87.2689	769.398	948.355	1104.53	1635.17	1993.04	2193.71	540.042
116	8657.89	76856.7	94475.1	110554	163749	199863	219389	53988.3										116	86.5789	768.567	944.751	1105.54	1637.49	1998.63	2193.89	539.883
117	8690.65	77067.7	95086.4	110866	163993	199878	219740	54127.5										117	86.9065	770.677	950.864	1108.66	1639.93	1998.78	2197.4	541.275
118	8682.45	77063.8	95039.6	110896	164392	200389	219836	54002.9										118	86.8245	770.638	950.396	1108.96	1643.92	2003.89	2198.36	540.029
119	8644.51	77166.7	95177.6	110883	164787	200717	220292	53976.2										119	86.4451	771.667	951.776	1108.83	1647.87	2007.17	2202.92	539.762
120	8743.64	77179.4	95339.1	111242	164970	200872	220547	54040.4										120	87.4364	771.794	953.391	1112.42	1649.7	2008.72	2205.47	540.404
121	8735.93	77384.4	95290.2	111249	165074	201146	220943	53888.5										121	87.3593	773.844	952.903	1112.49	1650.73	2011.46	2209.43	538.885
122	8686.66	77283.4	95513	111121	165584	201578	221064	53976.2										122	86.8666	772.834	955.13	1111.21	1655.84	2015.78	2210.64	539.762
123	8684.39	77528.9	95601.4	111548	165688	201823	221484	53908.2										123	86.8439	775.289	956.014	1115.48	1656.88	2018.23	2214.84	539.082
124	8704.89	77511.2	95414.5	111766	166342	202108	221863	54091.7										124	87.0489	775.112	954.145	1117.66	1663.42	2021.08	2218.63	540.917
125	8706.36	77524.2	95815.3	111945	166225	202146	222299	53892.4										125	87.0636	775.242	958.153	1119.45	1662.25	2021.46	2222.99	538.924
126	8689.22	77725.4	95688.9	112096	166748	202518	222291	54057.9										126	86.8922	777.254	956.889	1120.96	1667.48	2025.18	2222.91	540.579
127	8670.24	77902.7	95513.3	112044	167100	202904	222735	54068.6										127	86.7024	779.027	955.133	1120.44	1671	2029.04	2227.35	540.686
128	8729.75	77753	96089.2	112318	167280	203276	222603	54058.9										128	87.2975	777.53	960.893	1123.18	1672.8	2032.76	2226.03	540.589
129	8692.39	77687.2	95956.5	112363	167776	203313	223087	53844.4										129	86.9239	776.872	959.565	1123.63	1677.76	2033.13	2230.87	538.444
130	8670.18	78116.1	96222.4	112533	168199	204013	223536	53868.7										130	86.7018	781.161	962.224	1125.33	1681.99	2040.13	2235.36	538.687
131	8703.18	78004.3	96256.5	112562	168156	204044	223714	54020.1										131	87.0318	780.043	962.565	1125.62	1681.56	2040.44	2237.14	540.201
132	8696	77887.9	96392.5	112652	168492	204200	223852	53994.9										132	86.96	778.879	963.925	1126.52	1684.92	2042	2238.52	539.949
133	8696.17	77966.3	96453.3	112848	168688	204445	224160	53964.1										133	86.9617	779.663	964.533	1128.48	1686.88	2044.45	2241.6	539.641
134	8701.27	78238.8	96447.9	112776	168788	204933	224327	53954										134	87.0127	782.388	964.479	1127.76	1687.88	2049.33	2243.27	539.54
135	8718.49	78175.2	96462.3	113042	169172	205185	224704	54139.8										135	87.1849	781.753	964.623	1130.42	1691.72	2051.85	2247.04	541.398
136	8724.06	78339.5	96631.8	113322	169697	205251	225118	53885.3										136	87.2406	783.395	966.318	1133.22	1696.97	2052.51	2251.18	538.853
137	8705.84	78183	96751.7	113217	169799	205565	225361	53905.9										137	87.0584	781.83	967.517	1132.17	1697.99	2055.65	2253.61	539.059
138	8720.33	78157.4	96834.2	113432	170136	205777	226080	54048.8										138	87.2033	781.574	968.342	1134.32	1701.36	2057.77	2260.8	540.488
139	8768.58	78491.2	96813	113583	170445	206351	225962	54077.2										139	87.6858	784.912	968.13	1135.83	1704.45	2063.51	2259.62	540.772
140	8663.76	78402.5	96983.5	113513	170798	206415	225906	53962.4										140	86.6376	784.025	969.835	1135.13	1707.98	2064.15	2259.06	539.624
141	8705.15	78591.1	97072.5	113861	170953	206876	226709	54041.5										141	87.0515	785.911	970.725	1138.61	1709.53	2068.76	2267.09	540.415
142	8674.94	78728.9	97193.8	114025	171257	206756	226575	53966										142	86.7494	787.289	971.938	1140.25	1712.57	2067.56	2265.75	539.66
143	8707.28	78464.4	97436.3	114077	171561	207241	226798	54069.9										143	87.0728	784.644	974.363	1140.77	1715.61	2072.41	2267.98	540.699
144	8671.88	78805.4	97337.1	114140	171984	207409	227267	53946.4										144	86.7188	788.054	973.371	1141.4	1719.84	2074.09	2272.67	539.464
145	8741.48	78630.6	97342.8	114461	172135	207858	227537	54073.7										145	87.4148	786.306	973.428	1144.61	1721.35	2078.58	2275.37	540.737
146	8646.34	78853.2	97736.1	114399	172174	207899	227732	54264.1										146	86.4634	788.532	977.361	1143.99	1721.74	2078.99	2277.32	542.641
147	8747.57	78848.9	97526	114644	172648	208055	227681	53943.6										147	87.4757	788.489	975.26	1146.44	1726.48	2080.55	2276.81	539.436
148	8728.97	78741.3	97778.3	114852	172731	208664	228146	54101.3										148	87.2897	787.413	977.783	1148.52	1727.31	2086.64	2281.46	541.013
149	8709.73	78968.3	97647.8	114930	173085	208837	228423	54127.9										149	87.0973	789.683	976.478	1149.3	1730.85	2088.37	2284.23	541.279
150	8728.55	79159.8	97755.2	114989	173522	209069	228702	53951.6										150	87.2855	791.598	977.552	1149.89	1735.22	2090.69	2287.02	539.516
151	8754.46	79040.3	98116	115207	173585	209043	229416	53901.8										151	87.5446	790.403	981.16	1152.07	1735.85	2090.43	2294.16	539.018
152	8741	79236.4	98277.3	115182	173867	209510	229281	54180.1										152	87.41	792.364	982.773	1151.82	1738.67	2095.1	2292.81	541.801
153	8732	79199.3	98238.8	115316	174304	209767	229202	53946.9										153	87.32	791.993	982.388	1153.16	1743.04	2097.67	2292.01	539.469
154	8713.99	79260.8	98161.2	115363	174587	210018	229588	53940.4										154	87.1399	792.607	981.612	1153.63	1745.87	2100.18	2295.88	539.404
155	8712.33	79194.4	98268.7	115464	175037	210240	230007	54071.1										155	87.1233	791.944	982.687	1154.64	1750.37	2102.4	2300.07	540.711
156	8715.94	79274.7	98359.2	115638	175035	210637	230128	54136										156	87.1594	792.747	983.592	1156.38	1750.35	2106.37	2301.28	541.36
157	8716.52	79382.1	98426.8	115676	175521	210924	230313	54029.2										157	87.1652	793.821	984.268	1156.76	1755.21	2109.24	2303.13	540.292
158	8658.84	79414.9	98499.6	115779	175598	210905	230666	54123.9										158	86.5884	794.149	984.996	1157.79	1755.98	2109.05	2306.66	541.239
159	8680.5	79294.1	98628.7	115876	175875	211086	230892	54010.4										159	86.805	792.941	986.287	1158.76	1758.75	2110.86	2308.92	540.104
160	8609.35	79507.3	98681	116053	176094	211434	230996	54058										160	86.0935	795.073	986.81	1160.53	1760.94	2114.34	2309.96	540.58
161	8657.93	79616.7	98719.8	116152	176242	211603	231386	54022.5										161	86.5793	796.167	987.198	1161.52	1762.42	2116.03	2313.86	540.225
162	8758.92	79616.8	98798.1	116275	176362	211818	231315	53916.6										162	87.5892	796.168	987.981	1162.75	1763.62	2118.18	2313.15	539.166
163	8747.64	79665.8	98864	116169	177029	212172	231682	54082.6										163	87.4764	796.658	988.64	1161.69	1770.29	2121.72	2316.82	540.826
164	8636.24	79662	99044.3	116576	177081	212245	231874	54025.1										164	86.3624	796.62	990.443	1165.76	1770.81	2122.45	2318.74	540.251
165	8723.6	79725.8	99045	116543	177399	212742	232407	53953.3										165	87.236	797.258	990.45	1165.43	1773.99	2127.42	2324.07	539.533
166	8673.23	80008	99191.8	116714	177618	212953	232373	54083.5										166	86.7323	800.08	991.918	1167.14	1776.18	2129.53	2323.73	540.835
167	8688.9	79892	99175.9	116771	177881	212632	232484	54006.4										167	86.889	798.92	991.759	1167.71	1778.81	2126.32	2324.84	540.064
168	8661.99	80052.3	99113.8	117110	178190	213375	232614	54021.4										168	86.6199	800.523	991.138	1171.1	1781.9	2133.75	2326.14	540.214
169	8687.13	79922.6	99352.5	117026	178131	213321	232832	53978.9										169	86.8713	799.226	993.525	1170.26	1781.31	2133.21	2328.32	539.789
170	8683.63	80071.8	99326.2	117220	178657	213824	232853	53888.1										170	86.8363	800.718	993.262	1172.2	1786.57	2138.24	2328.53	538.881
171	8707.23	79943.5	99510.6	117297	179088	213949	233500	54162.7										171	87.0723	799.435	995.106	1172.97	1790.88	2139.49	2335	541.627
172	8663.57	80159.9	99495.3	117573	179133	214289	233840	54100.1										172	86.6357	801.599	994.953	1175.73	1791.33	2142.89	2338.4	541.001
173	8709.68	80218.1	99594.4	117481	179578	214298	233596	54189.1										173	87.0968	802.181	995.944	1174.81	1795.78	2142.98	2335.96	541.891
174	8677.86	80190.8	99554.7	117365	179595	214822	234064	54171.5										174	86.7786	801.908	995.547	1173.65	1795.95	2148.22	2340.64	541.715
175	8695.14	80331.3	99544.3	117744	179740	214646	234040	53951.5										175	86.9514	803.313	995.443	1177.44	1797.4	2146.46	2340.4	539.515
176	8617.46	80249.6	99773.9	117980	180081	214719	234350	53990.4										176	86.1746	802.496	997.739	1179.8	1800.81	2147.19	2343.5	539.904
177	8715.79	80494.1	99761.8	117792	180192	215459	234492	54033.6										177	87.1579	804.941	997.618	1177.92	1801.92	2154.59	2344.92	540.336
178	8800.27	80303.4	100042	118010	180578	215209	234995	54114										178	88.0027	803.034	1000.42	1180.1	1805.78	2152.09	2349.95	541.14
179	8643.52	80219.1	100089	118055	180875	215428	234860	54026.6										179	86.4352	802.191	1000.89	1180.55	1808.75	2154.28	2348.6	540.266
180	8710.18	80612.3	100078	118315	181341	216186	235296	54102.8										180	87.1018	806.123	1000.78	1183.15	1813.41	2161.86	2352.96	541.028
181	8726.25	80438.9	100158	118051	181223	215807	235486	53975.2										181	87.2625	804.389	1001.58	1180.51	1812.23	2158.07	2354.86	539.752
182	8675.32	80572.1	100199	118622	181419	215999	235211	54143.2										182	86.7532	805.721	1001.99	1186.22	1814.19	2159.99	2352.11	541.432
183	8712.66	80797.8	100432	118437	181906	216521	236071	54042.1										183	87.1266	807.978	1004.32	1184.37	1819.06	2165.21	2360.71	540.421
184	8695.48	80502.8	100336	118493	182190	216465	236105	54203										184	86.9548	805.028	1003.36	1184.93	1821.9	2164.65	2361.05	542.03
185	8661.28	80673.7	100412	118767	182223	216757	236169	54127.8										185	86.6128	806.737	1004.12	1187.67	1822.23	2167.57	2361.69	541.278
186	8705.47	80774.4	100480	118502	182362	217035	236050	54207.3										186	87.0547	807.744	1004.8	1185.02	1823.62	2170.35	2360.5	542.073
187	8683.19	80872.7	100495	118940	182573	217301	236338	54175.9										187	86.8319	808.727	1004.95	1189.4	1825.73	2173.01	2363.38	541.759
188	8673.74	80748.7	100826	119121	182961	217756	237016	54208.7										188	86.7374	807.487	1008.26	1191.21	1829.61	2177.56	2370.16	542.087
189	8738.76	80970.4	100789	119015	183339	217550	236716	54222.7										189	87.3876	809.704	1007.89	1190.15	1833.39	2175.5	2367.16	542.227
190	8734.11	80925.7	100694	119257	183407	217774	237283	54125.9										190	87.3411	809.257	1006.94	1192.57	1834.07	2177.74	2372.83	541.259
191	8682.21	81065.6	100903	119400	183586	217732	237337	54046										191	86.8221	810.656	1009.03	1194	1835.86	2177.32	2373.37	540.46
192	8715.99	80893.7	100827	119252	183928	217921	237629	54121.1										192	87.1599	808.937	1008.27	1192.52	1839.28	2179.21	2376.29	541.211
193	8746.81	81171.2	100949	119504	183940	218502	237806	54113.9										193	87.4681	811.712	1009.49	1195.04	1839.4	2185.02	2378.06	541.139
194	8729.35	80911.4	101165	119674	184298	218660	238032	54142.1										194	87.2935	809.114	1011.65	1196.74	1842.98	2186.6	2380.32	541.421
195	8680.43	81267.5	101104	119618	184705	218847	238317	54119.3										195	86.8043	812.675	1011.04	1196.18	1847.05	2188.47	2383.17	541.193
196	8731.07	81063.9	101230	119892	184975	218963	238450	54103.7										196	87.3107	810.639	1012.3	1198.92	1849.75	2189.63	2384.5	541.037
197	8716.23	81202.7	101226	119849	185258	219155	238353	54139.9										197	87.1623	812.027	1012.26	1198.49	1852.58	2191.55	2383.53	541.399
198	8648.67	81328.7	101193	120114	185457	219018	238664	54121.1										198	86.4867	813.287	1011.93	1201.14	1854.57	2190.18	2386.64	541.211
199	8713.18	81181.4	101187	119992	185580	219531	238792	54180.7										199	87.1318	811.814	1011.87	1199.92	1855.8	2195.31	2387.92	541.807
200	8707.87	81323.8	101373	120352	185855	219611	238829	54050.6										200	87.0787	813.238	1013.73	1203.52	1858.55	2196.11	2388.29	540.506
201	8671.6	81422.6	101321	120226	185889	220160	238896	53991.8										201	86.716	814.226	1013.21	1202.26	1858.89	2201.6	2388.96	539.918
202	8677.69	81629	101549	120305	186350	220010	239283	54069.1										202	86.7769	816.29	1015.49	1203.05	1863.5	2200.1	2392.83	540.691
203	8691.22	81457.1	101510	120596	186541	220063	239291	54084.1										203	86.9122	814.571	1015.1	1205.96	1865.41	2200.63	2392.91	540.841
204	8743.55	81671.7	101377	120408	186485	220529	239864	54102.1										204	87.4355	816.717	1013.77	1204.08	1864.85	2205.29	2398.64	541.021
205	8633.79	81520.5	101526	120687	186894	220756	239881	54089.4										205	86.3379	815.205	1015.26	1206.87	1868.94	2207.56	2398.81	540.894
206	8705.33	81570.5	101965	120851	187352	220948	239900	54103.3										206	87.0533	815.705	1019.65	1208.51	1873.52	2209.48	2399	541.033
207	8755.25	81720.8	101707	120772	187466	220743	240320	54205.9										207	87.5525	817.208	1017.07	1207.72	1874.66	2207.43	2403.2	542.059
208	8657.97	81670.2	101682	120706	187893	221093	240300	54139										208	86.5797	816.702	1016.82	1207.06	1878.93	2210.93	2403	541.39
209	8650.14	81867.9	102033	120958	187810	221144	240498	54194.3										209	86.5014	818.679	1020.33	1209.58	1878.1	2211.44	2404.98	541.943
210	8686.16	81525.1	102112	121113	187974	221350	240858	54069.8										210	86.8616	815.251	1021.12	1211.13	1879.74	2213.5	2408.58	540.698
211	8716.28	81653.6	101990	121041	188287	221893	240634	54106.8										211	87.1628	816.536	1019.9	1210.41	1882.87	2218.93	2406.34	541.068
212	8676.09	81731.7	102123	121230	188415	221858	241226	54302.6										212	86.7609	817.317	1021.23	1212.3	1884.15	2218.58	2412.26	543.026
213	8712.96	81864.8	102115	121283	188516	222100	241279	54148.2										213	87.1296	818.648	1021.15	1212.83	1885.16	2221	2412.79	541.482
214	8650.68	81770.4	102182	121389	188804	222020	241245	54196.5										214	86.5068	817.704	1021.82	1213.89	1888.04	2220.2	2412.45	541.965
215	8766.61	81906	102212	121527	189314	222382	241668	54085.3										215	87.6661	819.06	1022.12	1215.27	1893.14	2223.82	2416.68	540.853
216	8705.37	81843.6	102251	121423	189215	222351	241821	54003										216	87.0537	818.436	1022.51	1214.23	1892.15	2223.51	2418.21	540.03
217	8679.1	81956.5	102240	121759	189561	222635	241597	53998.4										217	86.791	819.565	1022.39	1217.59	1895.61	2226.35	2415.97	539.984
218	8664.62	82087.8	102492	121682	189866	222896	241658	53988.1										218	86.6462	820.878	1024.92	1216.82	1898.66	2228.96	2416.58	539.881
219	8669.64	82183.4	102399	121681	190308	223211	242034	54182.7										219	86.6964	821.834	1023.99	1216.81	1903.08	2232.11	2420.34	541.827
220	8666.8	82088.7	102451	121820	190113	223105	242278	54227.8										220	86.668	820.887	1024.51	1218.2	1901.13	2231.05	2422.78	542.278
221	8699.69	82234.9	102572	122278	190736	223265	242148	54275										221	86.9969	822.349	1025.72	1222.78	1907.36	2232.65	2421.48	542.75
222	8686.59	82274.5	102807	122177	190540	223645	242532	54102.3										222	86.8659	822.745	1028.07	1221.77	1905.4	2236.45	2425.32	541.023
223	8645.52	82248.5	102790	122489	191081	223746	242601	54206										223	86.4552	822.485	1027.9	1224.89	1910.81	2237.46	2426.01	542.06
224	8659.54	82197	102694	122045	191105	223849	242685	54073.6										224	86.5954	821.97	1026.94	1220.45	1911.05	2238.49	2426.85	540.736
225	8701.83	82292.6	102719	122493	191329	224243	242873	54099.3										225	87.0183	822.926	1027.19	1224.93	1913.29	2242.43	2428.73	540.993
226	8669.79	82219.5	102865	122365	191493	224200	243044	54108.5										226	86.6979	822.195	1028.65	1223.65	1914.93	2242	2430.44	541.085
227	8724.73	82365.4	102734	122417	191831	224325	243533	54011.7										227	87.2473	823.654	1027.34	1224.17	1918.31	2243.25	2435.33	540.117
228	8713.39	82373.3	102835	122579	191862	224378	243348	54103.2										228	87.1339	823.733	1028.35	1225.79	1918.62	2243.78	2433.48	541.032
229	8625.09	82406.2	102885	122545	192275	224622	243540	54081.5										229	86.2509	824.062	1028.85	1225.45	1922.75	2246.22	2435.4	540.815
230	8692.17	82383.1	102821	122766	192357	224866	243648	54040										230	86.9217	823.831	1028.21	1227.66	1923.57	2248.66	2436.48	540.4
231	8647.19	82424.4	102958	122619	192667	224844	243951	54112.7										231	86.4719	824.244	1029.58	1226.19	1926.67	2248.44	2439.51	541.127
232	8661.87	82708.5	102874	123037	192916	225305	244282	54235.3										232	86.6187	827.085	1028.74	1230.37	1929.16	2253.05	2442.82	542.353
233	8672.49	82685.8	103240	123013	192984	225380	244284	54155.6										233	86.7249	826.858	1032.4	1230.13	1929.84	2253.8	2442.84	541.556
234	8661.42	82462.2	103351	123297	193395	225495	244526	54249										234	86.6142	824.622	1033.51	1232.97	1933.95	2254.95	2445.26	542.49
235	8696.75	82582.7	103059	123007	193650	225732	244316	54071.6										235	86.9675	825.827	1030.59	1230.07	1936.5	2257.32	2443.16	540.716
236	8580.77	82705.4	103137	123195	193486	225813	244684	54217.4										236	85.8077	827.054	1031.37	1231.95	1934.86	2258.13	2446.84	542.174
237	8670.45	82626.2	103280	123174	193660	226021	244816	54225.8										237	86.7045	826.262	1032.8	1231.74	1936.6	2260.21	2448.16	542.258
238	8673.77	82782.4	103354	123432	194288	226169	244968	54163.5										238	86.7377	827.824	1033.54	1234.32	1942.88	2261.69	2449.68	541.635
239	8664.15	82774.1	103392	123423	194120	226349	245148	54095.3										239	86.6415	827.741	1033.92	1234.23	1941.19	2263.49	2451.47	540.953
240	8709.14	82781.6	103319	123494	194491	226388	245217	54102.2										240	87.0914	827.816	1033.19	1234.94	1944.91	2263.88	2452.17	541.022
241	8675.3	82850.9	103612	123661	194732	226448	245468	54129.4										241	86.753	828.509	1036.12	1236.61	1947.32	2264.48	2454.68	541.294
242	8714.66	83016.2	103650	123559	195006	226774	245383	54199.8										242	87.1466	830.162	1036.5	1235.59	1950.06	2267.74	2453.83	541.998
243	8643.01	82817.3	103493	123789	195161	226571	245695	54188.6										243	86.4301	828.173	1034.93	1237.89	1951.61	2265.71	2456.95	541.886
244	8649.2	83036.7	103722	123850	195206	226860	245735	54109.7										244	86.492	830.367	1037.22	1238.5	1952.06	2268.6	2457.35	541.097
245	8663.87	82952.1	103594	124055	195338	227003	246112	54101.4										245	86.6387	829.521	1035.94	1240.55	1953.38	2270.03	2461.12	541.014
246	8698.5	82969.1	103713	123836	195736	227516	245994	54116.6										246	86.985	829.691	1037.13	1238.36	1957.36	2275.16	2459.94	541.166
247	8678.05	83122.5	103859	123958	195770	227266	246087	54052.2										247	86.7805	831.225	1038.59	1239.58	1957.7	2272.66	2460.87	540.522
248	8730.43	83008.3	103624	124146	196050	227416	246343	54240.5										248	87.3043	830.083	1036.24	1241.46	1960.5	2274.16	2463.43	542.405
249	8695.62	83178.6	103794	124355	196063	227388	246293	54119.7										249	86.9562	831.786	1037.94	1243.55	1960.63	2273.88	2462.93	541.197
250	8739.5	83108.6	103793	124329	196476	227692	246654	54064.9										250	87.395	831.086	1037.93	1243.29	1964.76	2276.92	2466.54	540.649
251	8706.73	83213.3	103765	124228	196508	228217	246859	54127.1										251	87.0673	832.133	1037.65	1242.28	1965.08	2282.17	2468.59	541.271
252	8669.33	83223.2	104039	124499	196754	227795	246920	54161.5										252	86.6933	832.232	1040.39	1244.99	1967.54	2277.95	2469.2	541.615
253	8721.69	82955.7	103920	124477	197493	228538	246968	54040.2										253	87.2169	829.557	1039.2	1244.77	1974.93	2285.38	2469.68	540.402
254	8724.38	83200.5	104126	124598	197194	228543	247083	54196.4										254	87.2438	832.005	1041.26	1245.98	1971.94	2285.43	2470.83	541.964
255	8671.4	83377.7	104015	124683	197464	228623	247182	54176.2										255	86.714	833.777	1040.15	1246.83	1974.64	2286.23	2471.82	541.762
256	8714.55	83250.7	104092	124892	197738	228733	247431	54009.6										256	87.1455	832.507	1040.92	1248.92	1977.38	2287.33	2474.31	540.096
257	8696.89	83379.9	104180	125094	197872	229034	247493	54118.2										257	86.9689	833.799	1041.8	1250.94	1978.72	2290.34	2474.93	541.182
258	8661.53	83478	104117	124890	198243	228966	247830	54161.4										258	86.6153	834.78	1041.17	1248.9	1982.43	2289.66	2478.3	541.614
259	8660.1	83544.3	104266	125006	198236	228996	248086	54049.8										259	86.601	835.443	1042.66	1250.06	1982.36	2289.96	2480.86	540.498
260	8683.52	83409.6	104266	125088	198529	229262	247724	54033										260	86.8352	834.096	1042.66	1250.88	1985.29	2292.62	2477.24	540.33
261	8682.57	83347.8	104255	125206	198685	229523	248086	54256.1										261	86.8257	833.478	1042.55	1252.06	1986.85	2295.23	2480.86	542.561
262	8677.01	83660.4	104363	125269	198884	229465	248011	54128.4										262	86.7701	836.604	1043.63	1252.69	1988.84	2294.65	2480.11	541.284
263	8690.88	83598.3	104373	125132	198831	229393	248225	54081.6										263	86.9088	835.983	1043.73	1251.32	1988.31	2293.93	2482.25	540.816
264	8735.97	83446.8	104602	125426	199088	229759	248625	54191.3										264	87.3597	834.468	1046.02	1254.26	1990.88	2297.59	2486.25	541.913
265	8688.3	83476.2	104342	125301	199453	230084	248530	54061.1										265	86.883	834.762	1043.42	1253.01	1994.53	2300.84	2485.3	540.611
266	8703.77	83784.6	104347	125359	199467	230125	248444	54161.9										266	87.0377	837.846	1043.47	1253.59	1994.67	2301.25	2484.44	541.619
267	8698.27	83646.5	104552	125493	199832	230262	248784	54002.5										267	86.9827	836.465	1045.52	1254.93	1998.32	2302.62	2487.84	540.025
268	8635.24	83930.5	104770	125527	199891	230010	249084	54133										268	86.3524	839.305	1047.7	1255.27	1998.91	2300.1	2490.84	541.33
269	8698.57	83810.3	104684	125692	200089	230597	249108	54006										269	86.9857	838.103	1046.84	1256.92	2000.89	2305.97	2491.08	540.06
270	8659.96	83689.2	104557	125779	200180	230467	249142	54015.7										270	86.5996	836.892	1045.57	1257.79	2001.8	2304.67	2491.42	540.157
271	8710.7	83822.1	104776	125560	200405	230812	249164	54080.8										271	87.107	838.221	1047.76	1255.6	2004.05	2308.12	2491.64	540.808
272	8702.07	83721.8	104794	126122	200479	230865	249297	53996.8										272	87.0207	837.218	1047.94	1261.22	2004.79	2308.65	2492.97	539.968
273	8663.89	83877.2	104811	126078	200960	230950	249949	54107.2										273	86.6389	838.772	1048.11	1260.78	2009.6	2309.5	2499.49	541.072
274	8668.39	83779	105021	125922	200923	231065	249906	54144.8										274	86.6839	837.79	1050.21	1259.22	2009.23	2310.65	2499.06	541.448
275	8723.2	83721.9	104781	126226	201108	231134	249740	54195										275	87.232	837.219	1047.81	1262.26	2011.08	2311.34	2497.4	541.95
276	8661.25	83932.4	104978	126216	201149	231449	250110	54210.9										276	86.6125	839.324	1049.78	1262.16	2011.49	2314.49	2501.1	542.109
277	8696.37	83921.7	104932	126212	201543	231752	250114	54107.7										277	86.9637	839.217	1049.32	1262.12	2015.43	2317.52	2501.14	541.077
278	8674.75	83822.9	105057	126420	201889	231291	249756	54002										278	86.7475	838.229	1050.57	1264.2	2018.89	2312.91	2497.56	540.02
279	8653.64	84056.8	105100	126276	201966	231551	250286	54098.1										279	86.5364	840.568	1051	1262.76	2019.66	2315.51	2502.86	540.981
280	8708.82	83896	105125	126622	202133	231866	250606	54281.6										280	87.0882	838.96	1051.25	1266.22	2021.33	2318.66	2506.06	542.816
281	8701.98	83905.2	105064	126413	202510	232029	250584	54002.3										281	87.0198	839.052	1050.64	1264.13	2025.1	2320.29	2505.84	540.023
282	8652.17	84021.7	105053	126544	202399	231941	250580	54293.7										282	86.5217	840.217	1050.53	1265.44	2023.99	2319.41	2505.8	542.937
283	8703.25	83951.2	105289	126837	202789	232263	250364	54135.4										283	87.0325	839.512	1052.89	1268.37	2027.89	2322.63	2503.64	541.354
284	8665.39	84101.8	105152	126775	203272	232419	251013	54131.2										284	86.6539	841.018	1051.52	1267.75	2032.72	2324.19	2510.13	541.312
285	8684.32	84222.8	105232	126934	202805	232341	250752	54074.8										285	86.8432	842.228	1052.32	1269.34	2028.05	2323.41	2507.52	540.748
286	8685.11	84182.7	105368	127032	203391	232398	251223	54116.6										286	86.8511	841.827	1053.68	1270.32	2033.91	2323.98	2512.23	541.166
287	8718.33	84280.9	105376	126908	203493	232550	251241	54061.2										287	87.1833	842.809	1053.76	1269.08	2034.93	2325.5	2512.41	540.612
288	8680.59	84269	105422	127122	203473	232763	251428	54188.3										288	86.8059	842.69	1054.22	1271.22	2034.73	2327.63	2514.28	541.883
289	8692.66	84137.2	105389	127366	203756	233094	251543	54038.1										289	86.9266	841.372	1053.89	1273.66	2037.56	2330.94	2515.43	540.381
290	8741.31	84109	105498	127183	203864	232979	251613	53932.1										290	87.4131	841.09	1054.98	1271.83	2038.64	2329.79	2516.13	539.321
291	8662.84	84107.7	105520	127225	204028	232945	251850	53986.5										291	86.6284	841.077	1055.2	1272.25	2040.28	2329.45	2518.5	539.865
292	8670.42	84143.4	105559	127086	204074	233315	251500	54009.7										292	86.7042	841.434	1055.59	1270.86	2040.74	2333.15	2515	540.097
293	8688.96	84202.9	105286	127339	204132	233198	251774	54154.7										293	86.8896	842.029	1052.86	1273.39	2041.33	2331.98	2517.74	541.547
294	8684.94	84282.3	105723	127438	204696	233402	251947	54123.4										294	86.8494	842.823	1057.23	1274.38	2046.96	2334.02	2519.47	541.234
295	8689.84	84222	105528	127354	204892	233313	251956	54194.9										295	86.8984	842.22	1055.28	1273.54	2048.92	2333.13	2519.56	541.949
296	8708.18	84442	105367	127579	205117	233666	252337	54078.4										296	87.0818	844.42	1053.67	1275.79	2051.17	2336.66	2523.37	540.784
297	8699.85	84244.8	105628	127592	205236	233703	252067	54110.2										297	86.9985	842.448	1056.28	1275.92	2052.36	2337.03	2520.67	541.102
298	8635.33	84400.9	105881	127765	205590	233749	252421	54029.6										298	86.3533	844.009	1058.81	1277.65	2055.9	2337.49	2524.21	540.296
299	8709.51	84509.6	105718	127664	205282	233974	252383	54190.8										299	87.0951	845.096	1057.18	1276.64	2052.82	2339.74	2523.83	541.908
300	8698.29	84303.3	105758	127606	205966	234045	252761	53990.8										300	86.9829	843.033	1057.58	1276.06	2059.66	2340.45	2527.61	539.908
301	8683.26	84561.7	105809	127846	205875	234375	252873	54234.1										301	86.8326	845.617	1058.09	1278.46	2058.75	2343.75	2528.73	542.341
302	8660.04	84674	105798	127992	206096	234176	252535	54074.7										302	86.6004	846.74	1057.98	1279.92	2060.96	2341.76	2525.35	540.747
303	8660.27	84429.9	105979	127923	206153	234707	252962	54184.9										303	86.6027	844.299	1059.79	1279.23	2061.53	2347.07	2529.62	541.849
304	8758.22	84618.8	105955	128174	206235	234336	252837	54182.4										304	87.5822	846.188	1059.55	1281.74	2062.35	2343.36	2528.37	541.824
305	8643.01	84621.2	105884	128120	206514	234835	253118	54116										305	86.4301	846.212	1058.84	1281.2	2065.14	2348.35	2531.18	541.16
306	8675.72	84695.3	105984	128170	206713	234670	253247	53999.5										306	86.7572	846.953	1059.84	1281.7	2067.13	2346.7	2532.47	539.995
307	8593.38	84889.7	105943	128016	206887	235087	253486	54105.1										307	85.9338	848.897	1059.43	1280.16	2068.87	2350.87	2534.86	541.051
308	8703.78	84551.7	106015	128186	207062	235026	253205	54167.3										308	87.0378	845.517	1060.15	1281.86	2070.62	2350.26	2532.05	541.673
309	8686.92	84532.8	106120	128343	207185	235060	253320	54114.2										309	86.8692	845.328	1061.2	1283.43	2071.85	2350.6	2533.2	541.142
310	8688.71	84676.1	106114	128544	207410	235236	253510	54141.3										310	86.8871	846.761	1061.14	1285.44	2074.1	2352.36	2535.1	541.413
311	8686.99	84665.4	106026	128441	207524	235540	253768	54017.2										311	86.8699	846.654	1060.26	1284.41	2075.24	2355.4	2537.68	540.172
312	8691.45	84780.5	106249	128703	207738	235531	253773	54076.1										312	86.9145	847.805	1062.49	1287.03	2077.38	2355.31	2537.73	540.761
313	8683.85	84792	106246	128684	208064	235471	254078	54052.3										313	86.8385	847.92	1062.46	1286.84	2080.64	2354.71	2540.78	540.523
314	8642.06	84938	106191	128705	208206	235640	254070	54113.5										314	86.4206	849.38	1061.91	1287.05	2082.06	2356.4	2540.7	541.135
315	8714.84	84865.1	106143	128833	208139	235730	254006	54100.6										315	87.1484	848.651	1061.43	1288.33	2081.39	2357.3	2540.06	541.006
316	8680.67	84885.2	106142	128676	208373	235728	254185	54021.9										316	86.8067	848.852	1061.42	1286.76	2083.73	2357.28	2541.85	540.219
317	8692.74	84996.6	106106	128811	208592	235989	254382	54085.4										317	86.9274	849.966	1061.06	1288.11	2085.92	2359.89	2543.82	540.854
318	8739	84848.1	106187	128905	208740	236088	254582	54183.2										318	87.39	848.481	1061.87	1289.05	2087.4	2360.88	2545.82	541.832
319	8666.22	84823.4	106333	129075	209012	236031	254557	54097.5										319	86.6622	848.234	1063.33	1290.75	2090.12	2360.31	2545.57	540.975
320	8679.29	85282.5	106213	129064	209116	235967	254448	54107.7										320	86.7929	852.825	1062.13	1290.64	2091.16	2359.67	2544.48	541.077
321	8687.02	84927.5	106560	129005	209415	236352	254780	54065.9										321	86.8702	849.275	1065.6	1290.05	2094.15	2363.52	2547.8	540.659
322	8658.71	84842.7	106552	129267	209453	236588	254684	53961.8										322	86.5871	848.427	1065.52	1292.67	2094.53	2365.88	2546.84	539.618
323	8652.79	84962.3	106419	129339	209756	236701	254863	54128.5										323	86.5279	849.623	1064.19	1293.39	2097.56	2367.01	2548.63	541.285
324	8631.64	84876.5	106579	129256	209617	236788	255222	54101.8										324	86.3164	848.765	1065.79	1292.56	2096.17	2367.88	2552.22	541.018
325	8657.69	84996.6	106624	129458	209929	236470	254871	54046.3										325	86.5769	849.966	1066.24	1294.58	2099.29	2364.7	2548.71	540.463
326	8670.13	85182.6	106582	129417	210113	236970	254978	54108.2										326	86.7013	851.826	1065.82	1294.17	2101.13	2369.7	2549.78	541.082
327	8653.56	85188.5	106374	129569	210313	236813	254812	54213.2										327	86.5356	851.885	1063.74	1295.69	2103.13	2368.13	2548.12	542.133
328	8658.96	85182.6	106714	129651	210381	237149	255072	53964.8										328	86.5896	851.826	1067.14	1296.51	2103.81	2371.49	2550.72	539.648
329	8617.6	85222.4	106679	129753	210567	237160	255446	53933.1										329	86.176	852.224	1066.79	1297.53	2105.67	2371.6	2554.46	539.331
330	8678.63	85020.2	106625	129656	210803	237515	255300	54123.1										330	86.7863	850.202	1066.25	1296.56	2108.03	2375.15	2553	541.231
331	8670.62	85121	106795	129732	210988	237438	255456	54037.2										331	86.7062	851.21	1067.95	1297.32	2109.88	2374.38	2554.56	540.372
332	8657.15	85100.1	106616	129696	211092	237468	255524	54175.4										332	86.5715	851.001	1066.16	1296.96	2110.92	2374.68	2555.24	541.754
333	8692.21	85268.2	106658	129643	211287	237461	255644	54142.8										333	86.9221	852.682	1066.58	1296.43	2112.87	2374.61	2556.44	541.428
334	8643.93	85297.4	106820	129923	211308	237452	256056	54151.5										334	86.4393	852.974	1068.2	1299.23	2113.08	2374.52	2560.56	541.515
335	8647.11	85439.8	106614	130141	211679	237476	256141	54072.6										335	86.4711	854.398	1066.14	1301.41	2116.79	2374.76	2561.41	540.726
336	8658.98	85354.6	106552	129794	211442	237765	255877	54121										336	86.5898	853.546	1065.52	1297.94	2114.42	2377.65	2558.77	541.21
337	8716.16	85461.4	107004	130159	211962	237879	255960	54138.8										337	87.1616	854.614	1070.04	1301.59	2119.62	2378.79	2559.6	541.388
338	8720.39	85488.2	107085	129968	211991	238080	255874	54166.6										338	87.2039	854.882	1070.85	1299.68	2119.91	2380.8	2558.74	541.666
339	8673.92	85377.5	107092	130237	212377	237861	256260	54268.9										339	86.7392	853.775	1070.92	1302.37	2123.77	2378.61	2562.6	542.689
340	8636.32	85333.1	106932	130334	212437	238332	256245	54187.7										340	86.3632	853.331	1069.32	1303.34	2124.37	2383.32	2562.45	541.877
341	8654.41	85399.5	107000	130417	212240	238262	256516	54046.3										341	86.5441	853.995	1070	1304.17	2122.4	2382.62	2565.16	540.463
342	8743.46	85434.7	106913	130416	212501	238281	256546	54138.4										342	87.4346	854.347	1069.13	1304.16	2125.01	2382.81	2565.46	541.384
343	8668.31	85539.5	106990	130302	212862	238464	256526	54247.1										343	86.6831	855.395	1069.9	1303.02	2128.62	2384.64	2565.26	542.471
344	8667.96	85463.8	107014	130626	212881	238555	256776	54110.9										344	86.6796	854.638	1070.14	1306.26	2128.81	2385.55	2567.76	541.109
345	8667.61	85390.5	107058	130466	213183	238735	256684	54152.5										345	86.6761	853.905	1070.58	1304.66	2131.83	2387.35	2566.84	541.525
346	8665.49	85627.7	107095	130502	213127	238861	256824	54111.7										346	86.6549	856.277	1070.95	1305.02	2131.27	2388.61	2568.24	541.117
347	8684.13	85504.2	107197	130727	213145	238863	256974	54130										347	86.8413	855.042	1071.97	1307.27	2131.45	2388.63	2569.74	541.3
348	8629.29	85488.3	107083	130731	213665	238968	256963	54174.8										348	86.2929	854.883	1070.83	1307.31	2136.65	2389.68	2569.63	541.748
349	8628.71	85604.7	107185	130610	213630	238989	256978	54083.8										349	86.2871	856.047	1071.85	1306.1	2136.3	2389.89	2569.78	540.838
350	8699.55	85655.2	107333	130937	213882	239156	257191	54181.7										350	86.9955	856.552	1073.33	1309.37	2138.82	2391.56	2571.91	541.817
351	8594.59	85474.2	107153	130849	214004	239037	257422	54196										351	85.9459	854.742	1071.53	1308.49	2140.04	2390.37	2574.22	541.96
352	8706.24	85475.7	107318	131114	214063	239301	257230	54183.1										352	87.0624	854.757	1073.18	1311.14	2140.63	2393.01	2572.3	541.831
353	8638.04	85680.4	107153	131179	214280	239334	257446	53975.4										353	86.3804	856.804	1071.53	1311.79	2142.8	2393.34	2574.46	539.754
354	8602.17	85646.2	107328	131161	214432	239409	257732	53888.7										354	86.0217	856.462	1073.29	1311.61	2144.32	2394.09	2577.32	538.887
355	8615.23	85786	107221	131087	214457	239759	257707	54123.9										355	86.1523	857.86	1072.21	1310.87	2144.57	2397.59	2577.07	541.239
356	8625.24	85794.9	107424	130861	214626	239683	257336	54032.7										356	86.2524	857.949	1074.24	1308.61	2146.26	2396.83	2573.36	540.327
357	8642.86	85838.4	107278	131412	215039	239800	257759	54007.3										357	86.4286	858.384	1072.78	1314.12	2150.39	2398	2577.59	540.073
358	8630.34	85749.6	107257	131261	214713	239872	257610	54038.4										358	86.3034	857.496	1072.57	1312.61	2147.13	2398.72	2576.1	540.384
359	8622.73	85789.8	107437	131640	215367	239942	257743	54227.8										359	86.2273	857.898	1074.37	1316.4	2153.67	2399.42	2577.43	542.278
360	8673.88	85690	107397	131286	215093	240091	258074	54109.6										360	86.7388	856.9	1073.97	1312.86	2150.93	2400.91	2580.74	541.096
361	8651.12	85869.7	107459	131447	215548	239952	257706	54157										361	86.5112	858.697	1074.59	1314.47	2155.48	2399.52	2577.06	541.57
362	8649.44	85869.4	107757	131316	215629	240271	258231	54040.9										362	86.4944	858.694	1077.57	1313.16	2156.29	2402.71	2582.31	540.409
363	8697.57	85918.6	107504	131586	215860	240324	258114	54073.8										363	86.9757	859.186	1075.04	1315.86	2158.6	2403.24	2581.14	540.738
364	8648.03	85894.4	107394	131716	215797	240350	258454	54202.5										364	86.4803	858.944	1073.94	1317.16	2157.97	2403.5	2584.54	542.025
365	8639.75	85955.8	107442	131713	216064	240478	258308	54196.5										365	86.3975	859.558	1074.42	1317.13	2160.64	2404.78	2583.08	541.965
366	8709.22	85845.7	107694	131564	216354	240458	258504	54166.9										366	87.0922	858.457	1076.94	1315.64	2163.54	2404.58	2585.04	541.669
367	8694.2	86012.4	107556	131693	216431	240613	258308	54298.2										367	86.942	860.124	1075.56	1316.93	2164.31	2406.13	2583.08	542.982
368	8663.74	85933.6	107634	131829	216413	240638	258687	54162.1										368	86.6374	859.336	1076.34	1318.29	2164.13	2406.39	2586.87	541.621
369	8662.7	85863.6	107667	131760	216630	240644	258632	54048.5										369	86.627	858.636	1076.67	1317.6	2166.3	2406.44	2586.32	540.485
370	8699.49	85900.7	107577	131947	216894	240734	258491	54142.7										370	86.9949	859.007	1075.77	1319.47	2168.94	2407.34	2584.91	541.427
371	8692.15	85953.2	107830	131873	216859	240796	258962	54054.9										371	86.9215	859.532	1078.3	1318.73	2168.59	2407.96	2589.62	540.549
372	8662.47	86137.5	107609	131874	217160	240707	259125	54080.5										372	86.6247	861.375	1076.09	1318.74	2171.6	2407.07	2591.25	540.805
373	8612.43	85943.3	107746	131998	217310	241242	259268	53991.5										373	86.1243	859.433	1077.46	1319.98	2173.1	2412.42	2592.68	539.915
374	8721.1	86141.5	107770	132236	217612	240987	259151	54023										374	87.211	861.415	1077.7	1322.36	2176.12	2409.87	2591.51	540.23
375	8745.68	85826.2	107807	132383	217620	241310	259054	54115.8										375	87.4568	858.262	1078.07	1323.83	2176.2	2413.1	2590.54	541.158
376	8652.61	86184	107694	132089	217844	241216	259069	53977.3										376	86.5261	861.84	1076.94	1320.89	2178.44	2412.16	2590.69	539.773
377	8683.02	86030.4	107879	132321	217954	241421	259158	54192.9										377	86.8302	860.304	1078.79	1323.21	2179.54	2414.21	2591.58	541.929
378	8584.42	85996.5	107927	132491	217879	241565	259243	54131.5										378	85.8442	859.965	1079.27	1324.91	2178.79	2415.65	2592.43	541.315
379	8689.57	86044.1	107768	132489	218133	241337	259515	54074.7										379	86.8957	860.441	1077.68	1324.89	2181.33	2413.37	2595.15	540.747
380	8599.02	86082.4	107998	132426	218361	241723	259364	53905.3										380	85.9902	860.824	1079.98	1324.26	2183.61	2417.23	2593.64	539.053
381	8627	86147	107916	132549	218291	241690	259711	53918.8										381	86.27	861.47	1079.16	1325.49	2182.91	2416.9	2597.11	539.188
382	8633.75	86242.8	107822	132598	218866	241649	259322	54191.3										382	86.3375	862.428	1078.22	1325.98	2188.66	2416.49	2593.22	541.913
383	8631.29	86270	107904	132633	218563	241809	259896	54197										383	86.3129	862.7	1079.04	1326.33	2185.63	2418.09	2598.96	541.97
384	8633.34	86285.5	107992	132628	218815	241834	259404	53966.1										384	86.3334	862.855	1079.92	1326.28	2188.15	2418.34	2594.04	539.661
385	8683.5	86421.9	107969	132587	218912	241960	259658	54067										385	86.835	864.219	1079.69	1325.87	2189.12	2419.6	2596.58	540.67
386	8639.3	86215.9	107997	132820	219155	241674	259741	54138.5										386	86.393	862.159	1079.97	1328.2	2191.55	2416.74	2597.41	541.385
387	8651.5	86288.4	108192	132678	219235	242319	259990	53926.1										387	86.515	862.884	1081.92	1326.78	2192.35	2423.19	2599.9	539.261
388	8608.42	86173.5	108142	132976	219419	242212	259983	54112.4										388	86.0842	861.735	1081.42	1329.76	2194.19	2422.12	2599.83	541.124
389	8664.61	86054.1	107784	132969	219600	242177	260265	53957.3										389	86.6461	860.541	1077.84	1329.69	2196	2421.77	2602.65	539.573
390	8657.74	86112	107974	132930	219705	242240	260253	54016.7										390	86.5774	861.12	1079.74	1329.3	2197.05	2422.4	2602.53	540.167
391	8686.38	86324.4	108312	133067	219695	242377	260292	54061.6										391	86.8638	863.244	1083.12	1330.67	2196.95	2423.77	2602.92	540.616
392	8627.77	86314.2	108266	132905	220054	242117	260019	54017.4										392	86.2777	863.142	1082.66	1329.05	2200.54	2421.17	2600.19	540.174
393	8663.76	86520.7	108192	133003	220017	242635	260362	54153.8										393	86.6376	865.207	1081.92	1330.03	2200.17	2426.35	2603.61	541.538
394	8714.08	86312.1	108157	133448	220179	242608	260316	53991.4										394	87.1408	863.121	1081.57	1334.48	2201.79	2426.08	2603.16	539.914
395	8598.64	86387.5	108190	133294	220139	242683	260755	54063.3										395	85.9864	863.875	1081.9	1332.94	2201.39	2426.83	2607.55	540.633
396	8618.7	86426.8	108229	133382	220335	242494	260737	53962.4										396	86.187	864.268	1082.29	1333.82	2203.35	2424.94	2607.37	539.624
397	8661.19	86385.8	108164	133170	220763	243136	260903	53992.6										397	86.6119	863.858	1081.64	1331.7	2207.63	2431.36	2609.03	539.926
398	8615.94	86444.7	108446	133110	220773	242874	260801	53973.9										398	86.1594	864.447	1084.46	1331.1	2207.73	2428.74	2608.01	539.739
399	8613.08	86621.3	108280	133306	220747	242557	261164	54031.5										399	86.1308	866.213	1082.8	1333.06	2207.47	2425.57	2611.64	540.315
400	8636.05	86517.4	108259	133531	221019	243191	260724	54029										400	86.3605	865.174	1082.59	1335.31	2210.19	2431.91	2607.24	540.29
401	8685.04	86540.2	108384	133436	221138	243043	260912	54018										401	86.8504	865.402	1083.84	1334.36	2211.38	2430.43	2609.12	540.18
402	8655.28	86455.9	108366	133586	221390	243135	261280	53973.1										402	86.5528	864.559	1083.66	1335.86	2213.9	2431.35	2612.8	539.731
403	8664.3	86688.8	108346	133687	221473	243051	261292	54251.4										403	86.643	866.888	1083.46	1336.87	2214.73	2430.51	2612.92	542.514
404	8578.43	86353.5	108499	133605	221547	243319	261074	54107.9										404	85.7843	863.535	1084.99	1336.05	2215.47	2433.19	2610.74	541.079
405	8577.89	86619	108453	133843	221813	243503	261152	54069.5										405	85.7789	866.19	1084.53	1338.43	2218.13	2435.03	2611.52	540.695
406	8632.29	86486.9	108410	133809	221777	243364	261381	54092.2										406	86.3229	864.869	1084.1	1338.09	2217.77	2433.64	2613.81	540.923
407	8617.68	86521.4	108526	133878	222095	243608	261216	54104.3										407	86.1768	865.214	1085.26	1338.78	2220.95	2436.08	2612.16	541.043
408	8717.67	86393.7	108540	133907	221712	243456	261501	53898.5										408	87.1767	863.937	1085.4	1339.07	2217.12	2434.56	2615.01	538.985
409	8645.93	86535.6	108651	133964	222190	243655	261448	54029.6										409	86.4593	865.356	1086.51	1339.64	2221.9	2436.55	2614.48	540.296
410	8576.3	86602	108498	133953	222557	243908	261488	54103.7										410	85.763	866.02	1084.98	1339.53	2225.57	2439.08	2614.88	541.037
411	8659.02	86649.2	108448	133860	222386	243674	261876	54048.6										411	86.5902	866.492	1084.48	1338.6	2223.86	2436.74	2618.76	540.486
412	8623.13	86894	108834	134173	222430	243477	261512	54224.6										412	86.2313	868.94	1088.34	1341.73	2224.3	2434.77	2615.12	542.246
413	8661.82	86843.7	108490	134086	222706	243637	261835	54097.6										413	86.6182	868.437	1084.9	1340.86	2227.06	2436.37	2618.35	540.976
414	8606.85	86759	108786	133889	222861	243880	261640	54075.5										414	86.0685	867.59	1087.86	1338.89	2228.61	2438.8	2616.4	540.755
415	8573.5	86774	108684	134297	222993	244290	261946	54185.9										415	85.735	867.74	1086.84	1342.97	2229.93	2442.9	2619.46	541.859
416	8628.57	86888.4	108539	134323	222950	243907	261946	54011.9										416	86.2857	868.884	1085.39	1343.23	2229.5	2439.07	2619.46	540.119
417	8592.47	86690.6	108800	134443	223516	244241	261836	54000.1										417	85.9247	866.906	1088	1344.43	2235.16	2442.41	2618.36	540.001
418	8625.91	86575.1	108846	134511	222992	243780	261931	54158.9										418	86.2591	865.751	1088.46	1345.11	2229.92	2437.8	2619.31	541.589
419	8718.12	87008.4	108778	134488	223650	244138	262109	54188.4										419	87.1812	870.084	1087.78	1344.88	2236.5	2441.38	2621.09	541.884
420	8680.71	86596.8	108714	134440	223728	244314	262170	54120.3										420	86.8071	865.968	1087.14	1344.4	2237.28	2443.14	2621.7	541.203
421	8652.2	86848.6	108877	134517	223969	244298	262112	54039.1										421	86.522	868.486	1088.77	1345.17	2239.69	2442.98	2621.12	540.391
422	8671.3	86867	108980	134597	223892	244415	262508	54059.5										422	86.713	868.67	1089.8	1345.97	2238.92	2444.15	2625.08	540.595
423	8620.34	86921.9	108888	134680	224074	244560	262168	54053.1										423	86.2034	869.219	1088.88	1346.8	2240.74	2445.6	2621.68	540.531
424	8676.72	86808	109066	134481	224296	244675	262582	53974.2										424	86.7672	868.08	1090.66	1344.81	2242.96	2446.75	2625.82	539.742
425	8662.04	87115.8	109056	134630	224307	244349	262777	54084.3										425	86.6204	871.158	1090.56	1346.3	2243.07	2443.49	2627.77	540.843
426	8623.93	86995.7	108961	134645	224585	244881	262376	53905.4										426	86.2393	869.957	1089.61	1346.45	2245.85	2448.81	2623.76	539.054
427	8651.14	86814.5	108816	134864	224375	244673	262480	54043.4										427	86.5114	868.145	1088.16	1348.64	2243.75	2446.73	2624.8	540.434
428	8600.22	86918.5	108847	134861	224726	245102	262675	54193.3										428	86.0022	869.185	1088.47	1348.61	2247.26	2451.02	2626.75	541.933
429	8594.37	86999.9	108983	134646	224866	245138	262458	54042.9										429	85.9437	869.999	1089.83	1346.46	2248.66	2451.38	2624.58	540.429
430	8614.58	86899	108890	135021	224721	244967	262558	54035.8										430	86.1458	868.99	1088.9	1350.21	2247.21	2449.67	2625.58	540.358
431	8647.61	86967.9	109068	135055	225484	245223	263097	54001.5										431	86.4761	869.679	1090.68	1350.55	2254.84	2452.23	2630.97	540.015
432	8634.28	86890.1	109100	134990	225427	245203	262948	54038.7										432	86.3428	868.901	1091	1349.9	2254.27	2452.03	2629.48	540.387
433	8610.48	86861	109073	135286	225447	245238	262783	54060										433	86.1048	868.61	1090.73	1352.86	2254.47	2452.38	2627.83	540.6
434	8596.92	87090.7	109183	135095	225519	245046	262844	53948.1										434	85.9692	870.907	1091.83	1350.95	2255.19	2450.46	2628.44	539.481
435	8561.33	86960.5	109000	135298	225727	245308	262876	54046.6										435	85.6133	869.605	1090	1352.98	2257.27	2453.08	2628.76	540.466
436	8582.93	87000.3	109243	135209	225754	245509	263155	54013.9										436	85.8293	870.003	1092.43	1352.09	2257.53	2455.09	2631.55	540.139
437	8647.4	86956.6	109072	135197	225883	245250	263137	54025.3										437	86.474	869.566	1090.72	1351.97	2258.83	2452.5	2631.37	540.253
438	8676.63	87015.8	109194	135285	226024	245486	263589	54101.2										438	86.7663	870.158	1091.94	1352.85	2260.24	2454.86	2635.89	541.012
439	8613.86	87035.3	109409	135327	226102	245366	263760	54106										439	86.1386	870.353	1094.09	1353.27	2261.02	2453.66	2637.6	541.06
440	8625.43	87083.1	109178	135244	226305	245617	263162	54010.2										440	86.2543	870.831	1091.78	1352.44	2263.05	2456.17	2631.62	540.102
441	8644.22	86986.3	109091	135507	226383	245301	263274	53858.7										441	86.4422	869.863	1090.91	1355.07	2263.83	2453.01	2632.74	538.587
442	8673.85	86944.8	109256	135411	226289	245798	263518	53945.5										442	86.7385	869.448	1092.56	1354.11	2262.89	2457.98	2635.18	539.455
443	8622.57	87315.3	109311	135388	226507	245697	263297	54022.7										443	86.2257	873.153	1093.11	1353.88	2265.07	2456.97	2632.97	540.227
444	8609.96	87130.6	109249	135610	226581	245658	263698	54064.6										444	86.0996	871.306	1092.49	1356.1	2265.81	2456.58	2636.98	540.646
445	8654.57	87192.8	109339	135519	226657	245769	263841	54204.6										445	86.5457	871.928	1093.39	1355.19	2266.57	2457.69	2638.41	542.046
446	8695.35	87194.6	109333	135635	226718	245881	263710	54058.1										446	86.9535	871.946	1093.33	1356.35	2267.18	2458.81	2637.09	540.581
447	8635.87	87274.5	109464	135471	227146	245905	263637	54149.5										447	86.3587	872.745	1094.64	1354.71	2271.46	2459.05	2636.37	541.495
448	8627.88	87277.2	109579	135868	227040	246169	263835	54129.7										448	86.2788	872.772	1095.79	1358.68	2270.4	2461.69	2638.35	541.297
449	8614.79	87341.3	109488	135775	227581	245779	263974	54130										449	86.1479	873.413	1094.88	1357.75	2275.81	2457.79	2639.74	541.3
450	8640.17	87100.5	109686	135762	227681	246289	263842	54170.9										450	86.4017	871.005	1096.86	1357.62	2276.81	2462.89	2638.42	541.709
451	8655.75	87213.8	109264	135759	227780	246054	264062	53954.5										451	86.5575	872.138	1092.64	1357.59	2277.8	2460.54	2640.62	539.545
452	8603.54	87041.5	109527	136177	227857	246232	264090	54100.4										452	86.0354	870.415	1095.27	1361.77	2278.57	2462.32	2640.89	541.004
453	8645.01	87297.2	109312	135957	227638	246330	263960	54008.2										453	86.4501	872.972	1093.12	1359.57	2276.38	2463.3	2639.6	540.082
454	8640.51	87371.9	109741	135675	227927	246276	264169	53991.8										454	86.4051	873.719	1097.41	1356.75	2279.27	2462.76	2641.69	539.918
455	8670.23	87144.2	109562	135936	228091	246364	264107	53991.8										455	86.7023	871.442	1095.62	1359.36	2280.91	2463.64	2641.07	539.918
456	8619.71	87398.1	109725	136104	227886	246218	264195	53979.4										456	86.1971	873.981	1097.25	1361.04	2278.86	2462.18	2641.95	539.794
457	8639.86	87292.4	109594	136060	228484	246222	264435	54003.3										457	86.3986	872.924	1095.94	1360.6	2284.84	2462.22	2644.35	540.033
458	8625.63	87365	109588	136258	228290	246840	264370	54035.5										458	86.2563	873.65	1095.88	1362.58	2282.9	2468.4	2643.7	540.355
459	8619.54	87431.9	109741	136043	228410	246499	264539	54044.4										459	86.1954	874.319	1097.41	1360.43	2284.1	2464.99	2645.39	540.444
460	8587.17	87282.8	109824	136495	228803	246816	264476	54082.8										460	85.8717	872.828	1098.24	1364.95	2288.03	2468.16	2644.76	540.828
461	8594.88	87295.7	109728	136406	228654	246751	264822	53966.2										461	85.9488	872.957	1097.28	1364.06	2286.54	2467.51	2648.22	539.662
462	8595.48	87450.9	109877	136390	229137	246523	264406	54130.2										462	85.9548	874.509	1098.77	1363.9	2291.37	2465.23	2644.06	541.302
463	8652.21	87379.8	109851	136422	229146	246769	264435	54072.8										463	86.5221	873.798	1098.51	1364.22	2291.46	2467.69	2644.35	540.728
464	8644.57	87407.2	109743	136552	228911	246954	264810	54102.8										464	86.4457	874.072	1097.43	1365.52	2289.11	2469.54	2648.1	541.028
465	8645.79	87500.2	109857	136463	229562	246867	264795	53913.2										465	86.4579	875.002	1098.57	1364.63	2295.62	2468.67	2647.95	539.132
466	8696.92	87359.2	109933	136501	229474	247019	264659	53918.6										466	86.9692	873.592	1099.33	1365.01	2294.74	2470.19	2646.59	539.186
467	8608.44	87543.4	109789	136318	229744	247099	264935	53817.8										467	86.0844	875.434	1097.89	1363.18	2297.44	2470.99	2649.35	538.178
468	8598.8	87525	109952	136518	229633	246694	264837	54030.3										468	85.988	875.25	1099.52	1365.18	2296.33	2466.94	2648.37	540.303
469	8614.75	87534.1	109938	136809	229712	247359	264986	54029.2										469	86.1475	875.341	1099.38	1368.09	2297.12	2473.59	2649.86	540.292
470	8614.92	87572.8	109975	136936	229944	246945	265267	53808.4										470	86.1492	875.728	1099.75	1369.36	2299.44	2469.45	2652.67	538.084
471	8627.58	87473.7	109713	136691	229797	247037	265166	53944.7										471	86.2758	874.737	1097.13	1366.91	2297.97	2470.37	2651.66	539.447
472	8618.58	87580.1	109934	137056	230490	247374	265062	54070.5										472	86.1858	875.801	1099.34	1370.56	2304.9	2473.74	2650.62	540.705
473	8652.27	87459.6	109874	136884	230155	247596	265068	54004.2										473	86.5227	874.596	1098.74	1368.84	2301.55	2475.96	2650.68	540.042
474	8650.97	87616	109904	137023	230233	247370	265300	54131.6										474	86.5097	876.16	1099.04	1370.23	2302.33	2473.7	2653	541.316
475	8660.17	87495.9	110159	136991	230354	247735	265220	54016.5										475	86.6017	874.959	1101.59	1369.91	2303.54	2477.35	2652.2	540.165
476	8683.42	87742.4	109894	137220	230644	247490	265210	54093.3										476	86.8342	877.424	1098.94	1372.2	2306.44	2474.9	2652.1	540.933
477	8738.01	87718.1	110138	137065	230782	247750	265354	53955.3										477	87.3801	877.181	1101.38	1370.65	2307.82	2477.5	2653.54	539.553
478	8662.51	87617.3	110224	137040	230829	247664	265121	54025.4										478	86.6251	876.173	1102.24	1370.4	2308.29	2476.64	2651.21	540.254
479	8634.25	87521	110125	137226	231150	247753	265632	54080.6										479	86.3425	875.21	1101.25	1372.26	2311.5	2477.53	2656.32	540.806
480	8624.34	87572.7	109985	137061	231004	248033	265570	53907										480	86.2434	875.727	1099.85	1370.61	2310.04	2480.33	2655.7	539.07
481	8643.33	87746.4	110346	137234	230985	247901	265417	54141.3										481	86.4333	877.464	1103.46	1372.34	2309.85	2479.01	2654.17	541.413
482	8687.42	87675.8	110172	137323	231443	247859	265550	54044.9										482	86.8742	876.758	1101.72	1373.23	2314.43	2478.59	2655.5	540.449
483	8605.26	87617	110469	137267	231445	247589	265728	53909.2										483	86.0526	876.17	1104.69	1372.67	2314.45	2475.89	2657.28	539.092
484	8591.3	87512	110280	137516	231765	248045	265839	53935.4										484	85.913	875.12	1102.8	1375.16	2317.65	2480.45	2658.39	539.354
485	8646.86	87965.2	110253	137481	231737	247931	265710	54039.3										485	86.4686	879.652	1102.53	1374.81	2317.37	2479.31	2657.1	540.393
486	8604.57	87578.4	110400	137647	231806	247850	265717	53933.7										486	86.0457	875.784	1104	1376.47	2318.06	2478.5	2657.17	539.337
487	8590.61	87544.3	110267	137447	232087	248069	265946	54007.1										487	85.9061	875.443	1102.67	1374.47	2320.87	2480.69	2659.47	540.071
488	8600.93	87697.6	110588	137469	231803	248002	265861	53953.5										488	86.0093	876.976	1105.88	1374.69	2318.03	2480.02	2658.61	539.535
489	8581.34	87710.7	110516	137704	232174	248068	266069	54030.3										489	85.8134	877.107	1105.16	1377.04	2321.74	2480.68	2660.69	540.303
490	8581.79	87645	110375	137287	232298	248219	265902	53980.3										490	85.8179	876.45	1103.75	1372.87	2322.98	2482.19	2659.02	539.803
491	8592.72	87737.4	110445	137740	232061	247912	266210	53944.9										491	85.9272	877.374	1104.45	1377.4	2320.61	2479.12	2662.1	539.449
492	8607	87778.9	110349	137869	232321	248306	266115	53823.5										492	86.07	877.789	1103.49	1378.69	2323.21	2483.06	2661.15	538.235
493	8644.16	87703.4	110620	137780	232626	248312	266288	54106.5										493	86.4416	877.034	1106.2	1377.8	2326.26	2483.12	2662.88	541.065
494	8603.87	87814.4	110669	137592	232522	248223	266161	54099.9										494	86.0387	878.144	1106.69	1375.92	2325.22	2482.23	2661.61	540.999
495	8624.08	87783.5	110563	137597	232604	248276	266422	54059.3										495	86.2408	877.835	1105.63	1375.97	2326.04	2482.76	2664.22	540.593
496	8631.96	87686.4	110614	137883	232733	248354	266197	54037.9										496	86.3196	876.864	1106.14	1378.83	2327.33	2483.54	2661.97	540.379
497	8648.6	87847.7	110348	137964	232823	248639	266470	54083.1										497	86.486	878.477	1103.48	1379.64	2328.23	2486.39	2664.7	540.831
498	8580.22	87884.4	110597	138138	232980	248361	266321	53965.6										498	85.8022	878.844	1105.97	1381.38	2329.8	2483.61	2663.21	539.656
499	8695.36	87891.7	110535	138100	233218	248718	266238	53868.9										499	86.9536	878.917	1105.35	1381	2332.18	2487.18	2662.38	538.689
500	8612.03	87800.1	110868	138036	233282	248662	266377	54062.2										500	86.1203	878.001	1108.68	1380.36	2332.82	2486.62	2663.77	540.622
501	8546.24	87758.1	110352	138162	233174	248473	266368	54035.6										501	85.4624	877.581	1103.52	1381.62	2331.74	2484.73	2663.68	540.356
502	8577.23	87897.6	110822	138237	233048	248773	266487	54122.4										502	85.7723	878.976	1108.22	1382.37	2330.48	2487.73	2664.87	541.224
503	8588.79	87797.3	110740	138125	233785	248573	266586	53971.9										503	85.8879	877.973	1107.4	1381.25	2337.85	2485.73	2665.86	539.719
504	8654.21	88025.5	110762	138261	233807	249074	266729	54037.8										504	86.5421	880.255	1107.62	1382.61	2338.07	2490.74	2667.29	540.378
505	8627.59	87848	110975	138200	234037	248935	266760	53908.9										505	86.2759	878.48	1109.75	1382	2340.37	2489.35	2667.6	539.089
506	8627.32	87998.1	110710	138235	233644	249225	266605	54007.1										506	86.2732	879.981	1107.1	1382.35	2336.44	2492.25	2666.05	540.071
507	8657.41	88097.4	110786	138163	234121	248966	266916	53828										507	86.5741	880.974	1107.86	1381.63	2341.21	2489.66	2669.16	538.28
508	8579.66	87817.6	110982	138468	233860	248755	266834	53921.3										508	85.7966	878.176	1109.82	1384.68	2338.6	2487.55	2668.34	539.213
509	8628.46	88054.9	111013	138537	234310	249049	267131	54021										509	86.2846	880.549	1110.13	1385.37	2343.1	2490.49	2671.31	540.21
510	8643.46	87897.6	110979	138420	234340	249286	266804	54119										510	86.4346	878.976	1109.79	1384.2	2343.4	2492.86	2668.04	541.19
511	8669.51	88152.5	111051	138674	234439	249152	267158	53956										511	86.6951	881.525	1110.51	1386.74	2344.39	2491.52	2671.59	539.56
512	8559.47	88102.9	111082	138563	234714	249193	267390	54086.4										512	85.5947	881.029	1110.82	1385.63	2347.14	2491.93	2673.9	540.864
513	8619.75	88009.9	110931	138459	234758	249046	266845	53935.7										513	86.1975	880.099	1109.31	1384.59	2347.58	2490.46	2668.45	539.357
514	8599.58	87962.3	111175	138700	234669	249076	267147	53944.3										514	85.9958	879.623	1111.75	1387	2346.69	2490.76	2671.47	539.443
515	8613.44	87929.1	111110	138514	234699	249489	267047	54125.4										515	86.1344	879.291	1111.1	1385.14	2346.99	2494.89	2670.47	541.254
516	8587.74	87989.3	111042	138707	234913	249487	267213	54029.3										516	85.8774	879.893	1110.42	1387.07	2349.13	2494.87	2672.13	540.293
517	8668.47	87946.5	111102	138736	235128	249327	267116	53834.8										517	86.6847	879.465	1111.02	1387.36	2351.28	2493.27	2671.16	538.348
518	8656.46	88138.8	111112	138894	235248	249196	267491	54013.9										518	86.5646	881.388	1111.12	1388.94	2352.48	2491.96	2674.91	540.139
519	8632.42	88072.3	111188	138611	235112	249668	267426	53955										519	86.3242	880.723	1111.88	1386.11	2351.12	2496.68	2674.26	539.55
520	8589.19	88074.8	111098	138746	235262	249473	267322	54001.5										520	85.8919	880.748	1110.98	1387.46	2352.62	2494.73	2673.22	540.015
521	8637.35	88145	111294	138827	235552	249369	267529	53972.7										521	86.3735	881.45	1112.94	1388.27	2355.52	2493.69	2675.29	539.727
522	8625.3	87936.6	111345	139047	235542	249503	267248	53841.9										522	86.253	879.366	1113.45	1390.47	2355.42	2495.03	2672.48	538.419
523	8671.93	88148.7	111202	138903	235706	249602	267266	54107.9										523	86.7193	881.487	1112.02	1389.03	2357.06	2496.02	2672.66	541.079
524	8636.21	88244.3	111283	139127	235848	249500	267544	53932.8										524	86.3621	882.443	1112.83	1391.27	2358.48	2494.99	2675.44	539.328
525	8606.33	88075.9	111323	139061	236058	249653	267368	53811										525	86.0633	880.759	1113.23	1390.61	2360.58	2496.53	2673.68	538.11
526	8574.96	88199.2	111378	139056	236115	249705	267423	54004.4										526	85.7496	881.992	1113.78	1390.56	2361.15	2497.05	2674.23	540.044
527	8630.43	88283.6	111168	139236	236072	249805	267342	53931.8										527	86.3043	882.836	1111.68	1392.36	2360.72	2498.05	2673.42	539.318
528	8644.97	88120.4	111368	139365	236265	249840	267420	54053.7										528	86.4497	881.204	1113.68	1393.65	2362.65	2498.4	2674.2	540.537
529	8563.28	88327.1	111457	139332	236335	249758	268098	53944.9										529	85.6328	883.271	1114.57	1393.32	2363.35	2497.57	2680.98	539.449
530	8644.71	88153.3	111521	139296	236424	249825	267931	54040.2										530	86.4471	881.533	1115.21	1392.96	2364.24	2498.25	2679.31	540.402
531	8611.67	88145.3	111433	139510	236535	250068	267936	54088.6										531	86.1167	881.453	1114.33	1395.1	2365.35	2500.68	2679.36	540.886
532	8585.04	88218.9	111585	139302	236432	249892	267884	54091.9										532	85.8504	882.189	1115.85	1393.02	2364.32	2498.92	2678.84	540.919
533	8653.55	88147.1	111524	139466	236808	249956	267982	53857.9										533	86.5355	881.471	1115.24	1394.66	2368.08	2499.56	2679.82	538.579
534	8623.47	88242.7	111498	139441	236453	250233	267797	54084.8										534	86.2347	882.427	1114.98	1394.41	2364.53	2502.33	2677.97	540.848
535	8587.85	88301.5	111670	139413	236966	250220	267890	54022										535	85.8785	883.015	1116.7	1394.13	2369.66	2502.2	2678.9	540.22
536	8623.85	88125.7	111878	139500	237354	249910	267866	53997.3										536	86.2385	881.257	1118.78	1395	2373.54	2499.1	2678.66	539.973
537	8597.32	88382.7	111957	139280	236910	250043	268160	53924.8										537	85.9732	883.827	1119.57	1392.8	2369.1	2500.43	2681.6	539.248
538	8638.78	88294.7	111768	139624	237065	250129	268236	53982										538	86.3878	882.947	1117.68	1396.24	2370.65	2501.29	2682.36	539.82
539	8635.12	88606.6	111838	139508	237333	250107	267989	53906										539	86.3512	886.066	1118.38	1395.08	2373.33	2501.07	2679.89	539.06
540	8572.04	88196.4	111782	139735	237321	250129	268020	53844.1										540	85.7204	881.964	1117.82	1397.35	2373.21	2501.29	2680.2	538.441
541	8668.88	88433.1	111904	139983	237285	250437	268294	54061.2										541	86.6888	884.331	1119.04	1399.83	2372.85	2504.37	2682.94	540.612
542	8588.05	88363.7	112011	139671	237566	250296	268268	54013.4										542	85.8805	883.637	1120.11	1396.71	2375.66	2502.96	2682.68	540.134
543	8634.91	88211.7	111966	140004	237474	250273	268403	54024.6										543	86.3491	882.117	1119.66	1400.04	2374.74	2502.73	2684.03	540.246
544	8605.85	88477.6	112042	139863	237609	250435	268217	53863.3										544	86.0585	884.776	1120.42	1398.63	2376.09	2504.35	2682.17	538.633
545	8616.53	88364.4	112049	139942	237970	250583	268454	53987.2										545	86.1653	883.644	1120.49	1399.42	2379.7	2505.83	2684.54	539.872
546	8657.13	88284.4	112234	140253	238061	250795	268214	53922.3										546	86.5713	882.844	1122.34	1402.53	2380.61	2507.95	2682.14	539.223
547	8569	88427.2	112318	139885	238176	250417	268606	53825.8										547	85.69	884.272	1123.18	1398.85	2381.76	2504.17	2686.06	538.258
548	8593.22	88325.5	112115	140120	238167	250584	268364	53895.2										548	85.9322	883.255	1121.15	1401.2	2381.67	2505.84	2683.64	538.952
549	8567.96	88431.4	112302	140085	238247	250647	268394	53754.9										549	85.6796	884.314	1123.02	1400.85	2382.47	2506.47	2683.94	537.549
550	8611	88237.7	112287	140017	238168	250744	268443	54007.1										550	86.11	882.377	1122.87	1400.17	2381.68	2507.44	2684.43	540.071
551	8701.02	88477	111956	139804	238480	250629	268806	53969.5										551	87.0102	884.77	1119.56	1398.04	2384.8	2506.29	2688.06	539.695
552	8573.93	88551.5	112289	140219	238754	250455	268922	54015										552	85.7393	885.515	1122.89	1402.19	2387.54	2504.55	2689.22	540.15
553	8618.06	88355.4	112184	140244	238706	250771	268471	53957.9										553	86.1806	883.554	1121.84	1402.44	2387.06	2507.71	2684.71	539.579
554	8649.69	88530.3	112397	140265	238870	250712	268680	53983.8										554	86.4969	885.303	1123.97	1402.65	2388.7	2507.12	2686.8	539.837
555	8667.87	88690.8	112420	140357	238710	250519	268512	53752.6										555	86.6787	886.908	1124.2	1403.57	2387.1	2505.19	2685.12	537.526
556	8559.85	88413.3	112392	140477	238831	250842	268892	53991.8										556	85.5985	884.133	1123.92	1404.77	2388.31	2508.42	2688.92	539.918
557	8548.31	88292.2	112439	140387	239545	251059	268847	53978.8										557	85.4831	882.922	1124.39	1403.87	2395.45	2510.59	2688.47	539.788
558	8581.29	88581.8	112403	140431	239087	250663	268866	53915.9										558	85.8129	885.817	1124.03	1404.31	2390.87	2506.63	2688.66	539.159
559	8645.84	88479.5	112398	140453	239277	250968	268683	54010.4										559	86.4584	884.795	1123.98	1404.53	2392.77	2509.68	2686.83	540.104
560	8575.47	88650.8	112344	140571	239296	250999	268872	53906.1										560	85.7547	886.508	1123.44	1405.71	2392.96	2509.99	2688.72	539.061
561	8609.77	88714.6	112469	140200	239456	250872	268950	53943.2										561	86.0977	887.146	1124.69	1402	2394.56	2508.72	2689.5	539.432
562	8646.52	88434.3	112502	140572	239365	251011	269112	54007.6										562	86.4652	884.343	1125.02	1405.72	2393.65	2510.11	2691.12	540.076
563	8575.78	88695	112527	140623	239643	250762	268976	53982.1										563	85.7578	886.95	1125.27	1406.23	2396.43	2507.62	2689.76	539.821
564	8626.28	88529.4	112461	140664	239757	250963	269147	53882.2										564	86.2628	885.294	1124.61	1406.64	2397.57	2509.63	2691.47	538.822
565	8638.54	88685.2	112848	140901	240080	250865	269195	53907.4										565	86.3854	886.852	1128.48	1409.01	2400.8	2508.65	2691.95	539.074
566	8589.94	88759.1	112857	140748	240015	251060	269256	53917.7										566	85.8994	887.591	1128.57	1407.48	2400.15	2510.6	2692.56	539.177
567	8635.87	88461	112679	140783	240310	251195	268856	53891.6										567	86.3587	884.61	1126.79	1407.83	2403.1	2511.95	2688.56	538.916
568	8606.41	88557.6	112603	140687	240050	251128	269266	54047										568	86.0641	885.576	1126.03	1406.87	2400.5	2511.28	2692.66	540.47
569	8662.54	88759.9	112645	141055	240439	251112	269345	53942										569	86.6254	887.599	1126.45	1410.55	2404.39	2511.12	2693.45	539.42
570	8631.49	88431.8	112852	141078	240441	251413	269302	54005.7										570	86.3149	884.318	1128.52	1410.78	2404.41	2514.13	2693.03	540.057
571	8631.26	88705.9	112722	140971	240637	251569	269360	53941.4										571	86.3126	887.059	1127.22	1409.71	2406.37	2515.69	2693.6	539.414
572	8581.33	88521.1	112816	141100	241121	251627	269466	54026.7										572	85.8133	885.211	1128.16	1411	2411.21	2516.27	2694.66	540.267
573	8598.14	88760.6	112859	140913	240637	251114	269481	53950.2										573	85.9814	887.606	1128.59	1409.13	2406.37	2511.14	2694.81	539.502
574	8643.79	88569.8	113042	141148	241063	251814	269675	54082.7										574	86.4379	885.698	1130.42	1411.48	2410.63	2518.14	2696.75	540.827
575	8595.08	88755.5	112793	141020	240844	251300	269696	53945										575	85.9508	887.555	1127.93	1410.2	2408.44	2513	2696.96	539.45
576	8544.98	88876.3	113042	140954	241077	251390	269695	53944.1										576	85.4498	888.763	1130.42	1409.54	2410.77	2513.9	2696.95	539.441
577	8640.12	88964.5	113059	141103	241355	251581	269424	54058.9										577	86.4012	889.645	1130.59	1411.03	2413.55	2515.81	2694.24	540.589
578	8600.08	88851.2	113087	141138	241223	251367	269455	53964.3										578	86.0008	888.512	1130.87	1411.38	2412.23	2513.67	2694.55	539.643
579	8590.69	88734.5	113231	141364	241335	251569	269644	54032.6										579	85.9069	887.345	1132.31	1413.64	2413.35	2515.69	2696.45	540.326
580	8578.34	88747.4	113235	141226	241674	251498	269780	54038.6										580	85.7834	887.474	1132.35	1412.26	2416.74	2514.98	2697.8	540.386
581	8572.54	88816.5	113251	141384	241710	251657	269742	53890										581	85.7254	888.165	1132.51	1413.84	2417.1	2516.57	2697.42	538.9
582	8594.8	88796.9	113295	141374	241680	251732	269624	53945.4										582	85.948	887.969	1132.95	1413.74	2416.8	2517.32	2696.24	539.454
583	8590.06	88562.2	113130	141368	241621	251843	269940	53896.7										583	85.9006	885.622	1131.3	1413.68	2416.21	2518.43	2699.4	538.967
584	8586.2	88855.6	113286	141466	241886	251666	269985	53976.3										584	85.862	888.556	1132.86	1414.66	2418.86	2516.66	2699.85	539.763
585	8612.51	88774.1	113027	141521	241857	252008	270229	53989.7										585	86.1251	887.741	1130.27	1415.21	2418.57	2520.08	2702.29	539.897
586	8617.66	88575	113323	141642	242270	251895	270354	53968										586	86.1766	885.75	1133.23	1416.42	2422.7	2518.95	2703.54	539.68
587	8600.56	88751.5	113442	141811	242075	252136	270014	53990.9										587	86.0056	887.515	1134.42	1418.11	2420.75	2521.36	2700.14	539.909
588	8614.36	88817.6	113327	141896	242325	251974	270018	54150.1										588	86.1436	888.176	1133.27	1418.96	2423.25	2519.74	2700.18	541.501
589	8623.99	88897	113152	141612	242350	251954	269963	54024.6										589	86.2399	888.97	1131.52	1416.12	2423.5	2519.54	2699.63	540.246
590	8619.95	88987	113422	141777	242097	252341	269979	53972.4										590	86.1995	889.87	1134.22	1417.77	2420.97	2523.41	2699.79	539.724
591	8630.65	88764.7	113408	142151	242416	252145	270117	54055.3										591	86.3065	887.647	1134.08	1421.51	2424.16	2521.45	2701.17	540.553
592	8688.9	88935.9	113415	141768	242387	251905	270306	53960.8										592	86.889	889.359	1134.15	1417.68	2423.87	2519.05	2703.06	539.608
593	8558.17	88743.7	113657	141946	242711	252058	270007	54032.7										593	85.5817	887.437	1136.57	1419.46	2427.11	2520.58	2700.07	540.327
594	8620.57	89035.1	113628	141934	242792	252520	270122	54010.1										594	86.2057	890.351	1136.28	1419.34	2427.92	2525.2	2701.22	540.101
595	8609.84	88905.2	113873	141976	242796	252157	270187	53825.5										595	86.0984	889.052	1138.73	1419.76	2427.96	2521.57	2701.87	538.255
596	8576.21	88962.6	113856	142051	242934	252566	270117	53996.9										596	85.7621	889.626	1138.56	1420.51	2429.34	2525.66	2701.17	539.969
597	8553.48	89038.8	113426	142148	242809	252311	270403	53805.4										597	85.5348	890.388	1134.26	1421.48	2428.09	2523.11	2704.03	538.054
598	8606.6	89045.2	113647	142184	242845	252583	270504	53885.7										598	86.066	890.452	1136.47	1421.84	2428.45	2525.83	2705.04	538.857
599	8548.07	89062.1	113850	142040	243264	252485	270326	53971.6										599	85.4807	890.621	1138.5	1420.4	2432.64	2524.85	2703.26	539.716
600	8617.54	88952.5	113720	142308	243242	252256	270646	53874.9										600	86.1754	889.525	1137.2	1423.08	2432.42	2522.56	2706.46	538.749
