# Supplementary material for: Daptomycin forms a stable complex with phosphatidylglycerol for selective uptake to bacterial membrane
Source: eLife. 2025 Jun 2;13:RP93267. doi: 10.7554/eLife.93267 (PMC12129450; doi:10.7554/eLife.93267)
Supplement: Figure 2—figure supplement 2—source data 2. [file elife-93267-fig2-figsupp2-data2.xlsx]

## Sheet: Multi Scans KIN
Multi Scans KIN
Labels	1 KIN	2 KIN	3 KIN	4 KIN	5 KIN	6 KIN
Type	Kinetic Scan	Kinetic Scan	Kinetic Scan	Kinetic Scan	Kinetic Scan	Kinetic Scan
Comment
Start	0	0	0	0	0	0
Stop	600000000000	600000000000	600000000000	600000000000	600000000000	600000000000
Step	1000000000	1000000000	1000000000	1000000000	1000000000	1000000000
Fixed/Offset
XAxis	Time(ns)	Time(ns)	Time(ns)	Time(ns)	Time(ns)	Time(ns)
YAxis	Counts	Counts	Counts	Counts	Counts	Counts
0	18251.8	20213.2	23987.3	25514.1	47456.6	49336.7
1000000000	18262	20190.3	24147.4	25559.5	47744.7	49587.9
2000000000	18253.7	20184.1	24196.8	25693.8	47909.9	49908.1
3000000000	18248.3	20213	24241.3	25767.3	48197.5	50300.8
4000000000	18327	20167	24299.7	25846.2	48320.6	50448.9
5000000000	18273	20297.6	24301.5	25921.7	48677.6	50745.6
6000000000	18306	20295	24452.7	25941.5	48913.6	51096.4
7000000000	18284.1	20174.1	24416.2	26019.1	49106.4	51205.8
8000000000	18271.9	20263.5	24505.1	26049.4	49426.2	51580.2
9000000000	18295	20325.9	24587.8	26190.7	49508.2	51909.5
10000000000	18279.5	20278.3	24589.1	26405.8	49701	51957.8
11000000000	18396.2	20281.8	24717.8	26414.5	49966	52089.2
12000000000	18305.3	20377.1	24781	26493.5	50148.9	52439.7
13000000000	18176.6	20338.7	24746.4	26496.4	50229.4	52710.7
14000000000	18301.4	20323.4	24738.9	26625.2	50434.4	52983.8
15000000000	18347.5	20396.5	24868.9	26671.6	50665.8	53246.3
16000000000	18243.1	20376.1	24978.4	26677.9	50841.1	53936.1
17000000000	18303.6	20471	24979.4	26763.7	50991.5	53999.2
18000000000	18349.1	20447.6	25035	26871.9	51131.2	54087.5
19000000000	18338.4	20526.9	25097.3	26967.3	51219.1	54415.9
20000000000	18309.9	20554	25133	26930.3	51436.6	54786.7
21000000000	18322.8	20455.6	25104.4	27024.4	51624.4	54753.9
22000000000	18404.9	20545.3	25317.5	27053.1	51463.1	55038.9
23000000000	18314.2	20447	25283.6	27145.1	51800	55114.4
24000000000	18306	20504.9	25255	27135.3	51886.8	55447
25000000000	18299.3	20562.9	25312.6	27189.1	52052.3	55695.8
26000000000	18329.1	20583.5	25279.2	27336.7	52292.4	55737.1
27000000000	18279	20535.9	25419.3	27292.2	52329.7	55872.1
28000000000	18243.8	20594.4	25452.2	27418	52523.1	56115.4
29000000000	18385.7	20521	25619.5	27420	52543.6	56512.7
30000000000	18299.2	20563.5	25498.8	27483.9	52814.4	56595.2
31000000000	18341.7	20576	25546.9	27482	52903.8	56756
32000000000	18404.5	20588.1	25564.7	27628.6	53047.3	56886.5
33000000000	18281	20680.9	25594	27677.7	53112.1	57072.3
34000000000	18287.8	20641.2	25655.2	27736.1	53237.5	57435.2
35000000000	18285.1	20628	25717.2	27820.3	53406.9	57478.6
36000000000	18281.9	20733.1	25740.7	27781.8	53553.9	57852.6
37000000000	18331	20711	25740.5	27856.8	53537.2	57854.9
38000000000	18350.6	20771	25718.4	28005.5	53629.5	58024
39000000000	18319.8	20714.3	25721.2	27966.6	53876	58295.3
40000000000	18336	20724.9	25859.3	28005.1	53830	58318
41000000000	18377.8	20710.7	25852.4	27901.7	54045.4	58632
42000000000	18351.3	20731.3	25891.9	28175.2	54052.8	58778.5
43000000000	18331.9	20675	25953.1	28279.3	54312.4	58802.3
44000000000	18364.5	20798.7	26008.4	28233.1	54325.4	58954
45000000000	18341.3	20768.5	25915.5	28273.3	54353.5	59342.7
46000000000	18251.4	20798.1	25908.7	28220.8	54564.1	59410.3
47000000000	18419.7	20746.9	26044.6	28380.6	54691.8	59512.1
48000000000	18369.1	20815.6	26115.2	28360.6	54761.5	59624.6
49000000000	18363.4	20854.8	25939.6	28377.8	54869.6	60107.6
50000000000	18356.6	20770.9	26010	28359.2	54954.8	60034.7
51000000000	18356.4	20752.5	26145.7	28628.2	54955.8	60200.1
52000000000	18328.2	20792	26045.9	28517.7	55137.7	60422.9
53000000000	18378.8	20758.1	26042.9	28588.4	55313.2	60545.4
54000000000	18428	20833.5	26164.4	28457.6	55298.9	60740.1
55000000000	18385.6	20877.7	26095.6	28621	55435.3	61092.6
56000000000	18337.5	20866.8	26175.7	28681.5	55640.1	61012.6
57000000000	18422.3	20839.5	26201.5	28786.9	55670.1	61228.3
58000000000	18396.8	20866.5	26264.3	28793	55938.9	61437.6
59000000000	18321.3	20932.9	26334.1	28746.5	55964.5	61633.5
60000000000	18411.8	20933	26364.9	28878.7	55874.4	61783.6
61000000000	18386.9	20820.8	26331.6	28800.3	56121.6	62020.5
62000000000	18421.7	20918.9	26215.1	28875.4	56008.6	62074.4
63000000000	18336.5	20917.4	26403.6	28953.4	56196.8	62252.8
64000000000	18451.3	20884.8	26253.5	28970.5	56162.6	62391.5
65000000000	18388	20967.4	26460.4	29109.1	56376.9	62637
66000000000	18439.4	21000.4	26490.3	29097.6	56493.8	62888
67000000000	18458.2	20875.2	26513.1	29074.4	56491.5	62913.9
68000000000	18402.1	21023.5	26411.1	29160.2	56520.7	62947.1
69000000000	18377.6	20991.8	26517.4	29151.9	56601.3	63076.6
70000000000	18364.3	20984.5	26521.5	29200.4	56718.1	63500.8
71000000000	18447.1	20916.5	26513.2	29174.2	56725.1	63585.5
72000000000	18407.9	20962.2	26545.8	29155.7	57101.4	63616
73000000000	18395.5	20988.7	26569.5	29295	57009	63715.6
74000000000	18463.2	21005.9	26616.6	29283.1	57216.6	64105.4
75000000000	18432.6	20907.3	26528.3	29336.2	57266.6	64233.9
76000000000	18442.4	20974.3	26554.2	29222.4	57216.3	64384.7
77000000000	18469.9	21011.4	26601.7	29437	57318.4	64517.9
78000000000	18510.2	20900	26619.1	29532.9	57425.6	64630.8
79000000000	18471.2	21037.4	26665.8	29530.4	57786.4	64877.6
80000000000	18370.5	20998.7	26720.4	29608.6	57746.5	64868.9
81000000000	18474.7	21035.5	26592.9	29505.8	57723	65001.3
82000000000	18527.2	21048.6	26769.5	29485.3	57828.3	65184.1
83000000000	18431.2	21131.9	26681.4	29612.9	57850.3	65534.1
84000000000	18427	21118.9	26734.5	29703.4	58014.8	65341.9
85000000000	18482.7	21138	26697.9	29785.5	58063.9	65662.4
86000000000	18352.2	21087.7	26654	29704.2	57993.1	65912.9
87000000000	18494.3	21037	26753.7	29741.9	58133.3	65983.2
88000000000	18539.8	21055	26793.7	29860.1	58309.2	66096.1
89000000000	18455.5	21020.4	26797	29828.1	58474.5	66222.1
90000000000	18472.9	21099.6	26849.1	29906.7	58627.5	66624.5
91000000000	18421.7	21140.6	26826.9	29878.9	58415.3	66738.7
92000000000	18461.7	21111.4	26837.1	29887.9	58662.8	66875.8
93000000000	18389.1	21127.3	26861.2	29994.3	58619.9	67054.5
94000000000	18493.7	21180.6	26948.5	29968.1	58714.1	67238
95000000000	18350.6	21117.9	26884.3	30175.6	59008.3	67004.4
96000000000	18471.2	21239	26915.5	30006.2	58788.9	67532.4
97000000000	18514.5	21089.2	26942.7	29997.3	58985.6	67602
98000000000	18451.4	21130.9	26907.9	30035.8	58923.4	67697.7
99000000000	18504.8	21194.2	26966.2	30029.2	59223.5	67910.2
100000000000	18478.3	21074	27015.2	30120.1	59179.7	68007.5
101000000000	18484.3	21181.9	27014	30223.5	59240.4	68115.8
102000000000	18452.9	21154.9	26980	30185.1	59492.4	68300.7
103000000000	18463.1	21218.4	27006.4	30191.2	59503.6	68303.1
104000000000	18428.5	21113.6	27045	30334.7	59556.5	68505.5
105000000000	18414.8	21105.3	27010.3	30124.6	59558.2	68531.7
106000000000	18439.2	21167.4	27031	30269.2	59795	68857.2
107000000000	18394.9	21228.6	27063.9	30330.7	59924.3	69059.1
108000000000	18532.9	21204.5	26993.6	30290.9	59822.5	69010.9
109000000000	18403.4	21172	27069.8	30320	59886.8	69165
110000000000	18463.4	21178.4	27174.5	30423.6	60053.3	69343.5
111000000000	18514.3	21249.3	27074.2	30411.8	60020.3	69631.5
112000000000	18508.8	21237.2	27139.6	30444.8	60264.9	69660.9
113000000000	18461.6	21275.7	27118.5	30585.1	60202.9	69887.1
114000000000	18456.8	21184.8	27135.6	30595.2	60304.7	69887
115000000000	18539.5	21231.6	27181.1	30649	60393.2	70219.9
116000000000	18539.2	21234.6	27211.7	30658	60575.2	70282.2
117000000000	18442.1	21278.9	27217.7	30644.5	60510.6	70447.9
118000000000	18513.5	21244	27195	30717	60592.5	70669.8
119000000000	18434.9	21167.1	27181.3	30666.4	60538.1	70797.1
120000000000	18443.3	21237	27146.1	30706.4	60756.2	70910.8
121000000000	18544.9	21174.7	27184.7	30688.4	60750.9	70945
122000000000	18517.5	21206.5	27256.8	30820.9	60892.7	71296.8
123000000000	18496.3	21323.4	27278.5	30865.9	61022.6	71435.3
124000000000	18544.8	21298.9	27241.8	30784	61052.9	71498
125000000000	18526.8	21312.5	27211.2	30790.9	61163.6	71427.8
126000000000	18482.9	21329.8	27319.9	30765.6	61336.8	71947.3
127000000000	18551.5	21298.7	27342.8	30922.7	61180.9	71724.9
128000000000	18486.7	21230.1	27315.3	30960.4	61333.4	71967
129000000000	18486.4	21219.7	27271.8	30858.2	61356.5	72270
130000000000	18533.9	21302.6	27388.1	30880.1	61520.6	72131.3
131000000000	18496.2	21332.6	27221.6	30813.1	61585.3	72456.7
132000000000	18576.5	21233.8	27334.7	30929.3	61589.6	72520.4
133000000000	18552.4	21267	27353.7	31035.9	61707	72714.4
134000000000	18537.8	21403.3	27283.2	31083.4	61861.4	72736.4
135000000000	18495	21359.2	27382.4	31148.3	61845.3	72963.1
136000000000	18567.9	21230.9	27470.8	31231.7	61980.7	73098.9
137000000000	18560.1	21422.7	27335.3	31196.1	61979.6	73260.8
138000000000	18491.4	21332.7	27347.2	31178.1	62032.2	73237.9
139000000000	18452.7	21470.3	27384.7	31163.6	62102.2	73491.4
140000000000	18429.2	21355.9	27405.8	31241.1	62141.2	73656
141000000000	18627.2	21366	27449.3	31199.8	62364.3	73742.7
142000000000	18603.8	21390.6	27427.4	31258.1	62284.7	73818.5
143000000000	18571.7	21269.2	27446.8	31268	62417.5	73960.9
144000000000	18488.5	21404	27462	31337	62462.1	74154.9
145000000000	18512.1	21296.8	27398.5	31375.2	62593.3	74379.7
146000000000	18667.8	21250.5	27488.5	31292.8	62671.5	74411.4
147000000000	18538.7	21363.6	27362.1	31276.5	62681.5	74479.7
148000000000	18520.9	21290.6	27416.9	31257	62700.2	74795.4
149000000000	18565.1	21329.8	27403.5	31412.5	62862.1	74850
150000000000	18552.4	21399.9	27490.9	31416.9	62887.7	75066.6
151000000000	18569.6	21437	27526.1	31552.5	62936.6	75088.1
152000000000	18571	21374.7	27452.5	31472.6	63072.2	75161.1
153000000000	18594.3	21407	27451.2	31387	63129.2	75252.9
154000000000	18540.2	21431.3	27534.1	31591.8	63214.5	75488.3
155000000000	18508	21398.7	27490.3	31493.8	63028.7	75638.8
156000000000	18562.5	21365.5	27516	31671.8	63388.5	75865.4
157000000000	18612.2	21432.4	27570.2	31587.7	63229.1	75856.4
158000000000	18551	21399	27574.3	31609.8	63511	75929.8
159000000000	18587.7	21455.7	27492.2	31733.4	63335.1	76281.3
160000000000	18549.5	21319.7	27624.5	31666.8	63590	76232.9
161000000000	18674.9	21458.6	27561.2	31616.6	63755.8	76149.2
162000000000	18461.7	21473.5	27652.5	31770.3	63699.7	76635.8
163000000000	18581.9	21450.8	27653	31772.3	63877.5	76541
164000000000	18563.9	21392.8	27616.3	31734	63901.1	76675.5
165000000000	18631.5	21399.9	27667.7	31709.3	64054.8	76789.9
166000000000	18572.9	21385.5	27692.7	31827.2	64086.3	76827.3
167000000000	18595.1	21420.8	27687.7	31749.1	64084.7	77205.4
168000000000	18580.2	21387.6	27636.8	31826.3	64140.8	77163.7
169000000000	18512.9	21388.8	27636.4	31844.2	64448	77346.7
170000000000	18562	21471.6	27653.7	31918.8	64379.4	77655.3
171000000000	18575.1	21488.5	27662.5	31874.4	64446.6	77634.9
172000000000	18595.8	21433.3	27762.2	31854	64481.2	77696.9
173000000000	18585.1	21349.4	27652	31844.6	64499.7	77871.9
174000000000	18620.4	21514	27654.2	31925.8	64419.4	77887.6
175000000000	18685	21410.8	27590.6	31853.1	64678.9	78191.4
176000000000	18661.9	21418.4	27667.1	31878.1	64654.5	78325.2
177000000000	18580.7	21517.1	27618.4	31964.8	64863.4	78474
178000000000	18595	21494.6	27766.4	32075.1	64981	78315.8
179000000000	18616.9	21428	27798.6	32049	64786.7	78651.3
180000000000	18677	21447	27641.6	32001.5	65035	78897.3
181000000000	18518.1	21459.6	27732.3	32087.7	65049.1	78891.2
182000000000	18593.3	21533.1	27825.6	32208.9	65168	78920.2
183000000000	18548.1	21483.4	27661.9	32116.1	65122	78850.7
184000000000	18529.5	21583.7	27833.5	32158	65153	79259
185000000000	18688.9	21514.4	27809.3	32187.8	65299.6	79385.9
186000000000	18538.9	21496.8	27623.3	32246.8	65508.7	79323.6
187000000000	18643	21504.9	27746.1	32130.6	65561.3	79535.8
188000000000	18647.4	21495.5	27770.2	32227.9	65508.6	79486.8
189000000000	18569.3	21558.8	27894.1	32251.6	65600.5	79707
190000000000	18624.2	21527.8	27842.8	32198.3	65718.7	79839.8
191000000000	18655.3	21531.3	27741.7	32242.5	65607	79988.4
192000000000	18585.5	21542.9	27761.6	32256.8	65790.1	79960.4
193000000000	18630.8	21436.3	27815.8	32334	65926.4	80153.8
194000000000	18634.1	21581.4	27788.9	32288.7	65884.7	80341.2
195000000000	18615.9	21496.2	27831.1	32311.1	66019.4	80299.2
196000000000	18613.4	21620.5	27834	32354	66256.4	80558.3
197000000000	18611.2	21548.7	27825.4	32359.8	66072.7	80583.6
198000000000	18583	21603.5	27899.4	32331.2	66115.4	80713.8
199000000000	18628.7	21601.7	27757.8	32311	66164.5	80979.8
200000000000	18675.5	21500.8	27828.8	32380.9	66264.8	80875.5
201000000000	18551.2	21494.2	27789.4	32440.9	66293.8	81050.1
202000000000	18621.8	21444.7	27875.7	32423.2	66350.2	81114.4
203000000000	18644.4	21508.2	27980.2	32524.9	66480.9	81172.2
204000000000	18575.5	21527.1	27888.3	32361.1	66530.6	81414.6
205000000000	18666.4	21571.5	27882	32516.6	66706.9	81549.2
206000000000	18629.6	21486.4	27813.6	32443.6	66545.5	81515
207000000000	18642.3	21451.2	27923.3	32507.2	66778.4	81785.5
208000000000	18688.8	21561.5	27908.4	32629.6	66669.4	81910.1
209000000000	18666.7	21551.9	27923.3	32470.6	66758.4	82037.8
210000000000	18647.7	21566.6	27872.5	32480.7	67092.8	81952
211000000000	18643.1	21524.4	27946.6	32622.2	67119.6	82155.4
212000000000	18760.2	21593.1	27926.9	32577.7	67071.2	82176
213000000000	18689.8	21608.7	27905.4	32536.4	67324.8	82485.3
214000000000	18544.2	21536.4	28034.9	32620.2	67117.2	82455.6
215000000000	18569.8	21606.2	27979.6	32507.6	67417.1	82481.7
216000000000	18735.7	21521.6	28001.8	32755.5	67360.8	82548.6
217000000000	18720.2	21622.6	27959.8	32684	67517.9	82776
218000000000	18664.3	21543.4	27890.4	32699.1	67396	82851.8
219000000000	18572.3	21591.3	27871.3	32856.6	67562.2	82808.8
220000000000	18628.4	21543.6	28031.8	32782.4	67568.6	82957.1
221000000000	18661.4	21586.2	27990	32749.4	67676.5	83075.1
222000000000	18715.6	21611.7	27908.1	32740	67919.1	83221.7
223000000000	18639.4	21563.5	27968.3	32724.9	67865.7	83409.2
224000000000	18641.6	21455	28032.7	32912.1	67812.9	83492.7
225000000000	18696.4	21619.7	27919.6	32795.7	67679.7	83617.7
226000000000	18725.4	21533.4	27929.4	32902.4	67855.8	83694.8
227000000000	18656.6	21576.9	27932	32932.2	67881.4	83597.4
228000000000	18735.2	21609.9	27950.8	32818.7	68172.6	83702.4
229000000000	18693.9	21521.6	28101.4	32834.7	68107.8	84001.7
230000000000	18718.1	21520.7	28037	32876.8	68111.1	84009.7
231000000000	18715.2	21543.5	27990.2	32925.3	68231.5	84083.7
232000000000	18662.3	21544	28090.9	32824.5	68260.6	84394.2
233000000000	18706	21529.9	28118.9	32888.9	68275.5	84354.2
234000000000	18715.9	21600.4	27999.5	32904.2	68409.8	84373.1
235000000000	18725.6	21579.1	28048.5	33011.3	68525.1	84442.4
236000000000	18599.1	21608.1	28072.2	32957.1	68623.4	84678.6
237000000000	18733.9	21679	28083.7	32976.6	68632.5	84778.6
238000000000	18730	21608.4	28116.1	33017.9	68723.9	84879
239000000000	18718.9	21630.1	28147.7	33095.7	68738.7	84848
240000000000	18709.1	21520.6	28053.4	33167.6	68752.9	84871
241000000000	18779.1	21600.2	28039.5	33038.6	68813.7	85098.1
242000000000	18690.5	21610.3	28204.1	33166.2	68829.1	85143.7
243000000000	18661.4	21565.9	28075.4	33099.3	68921	85169.1
244000000000	18680.3	21594.4	28111.6	33123.1	69216.5	85412.6
245000000000	18637.1	21619.9	28085.4	33213.8	69123	85438.2
246000000000	18747.7	21707.2	28069.8	33074.7	69174.2	85486.8
247000000000	18672.8	21606	28171.7	33143.1	69177.7	85656.9
248000000000	18634.4	21648	28033.3	33305.5	69298.3	85579.4
249000000000	18689.6	21625.5	28046.8	33159.9	69373.7	85688.9
250000000000	18735.5	21666.8	28213.3	33261.3	69448.2	85930.3
251000000000	18692.1	21602.5	28230.7	33241.4	69342.1	85898.7
252000000000	18750.2	21673.9	28230.2	33072.8	69523.5	85965.2
253000000000	18608.8	21750.9	28172.5	33198.5	69580	85960.7
254000000000	18758.5	21630.8	28119.7	33201.5	69772.4	86188.1
255000000000	18761.5	21658.1	28107.4	33365.4	69851.6	86234.1
256000000000	18739.4	21675.6	28103	33309.1	69721	86483.3
257000000000	18642.7	21662.2	28193.4	33253.8	69759.1	86258.8
258000000000	18734.7	21554.6	28060.9	33277.2	69825.7	86638.8
259000000000	18720.9	21678.2	28103.6	33363.7	69887.4	86548.9
260000000000	18702	21641.2	28233.9	33258.5	69934.6	86917.1
261000000000	18671.4	21735.2	28110.2	33388.2	70081.5	86738
262000000000	18727.5	21679.6	28161.9	33383.4	70149.8	86748.3
263000000000	18671.5	21606	28216.1	33353	70132.7	86978.1
264000000000	18653.9	21650	28109.5	33459.7	70297.4	87037.3
265000000000	18674.6	21680	28100.1	33436.4	70314.5	87094.8
266000000000	18701	21628.2	28174.9	33414.1	70380.7	87209
267000000000	18777.5	21610.9	28145.8	33386.2	70287.9	87302.1
268000000000	18804.6	21709.5	28178.8	33477.8	70357.2	87303.6
269000000000	18731	21661.1	28078.7	33508.3	70548.3	87466.4
270000000000	18692.1	21739	28136.1	33506.9	70695.2	87492.9
271000000000	18739.4	21629.6	28178.4	33536.6	70666	87727.1
272000000000	18779	21608.9	28193.8	33495.1	70630.5	87709.1
273000000000	18736.8	21593.3	28254.4	33502.9	70880.2	87833.6
274000000000	18633.2	21708	28281.6	33572.6	70852.4	87926.2
275000000000	18777.8	21571	28212.3	33656.4	70817	88115.8
276000000000	18667.2	21768.4	28210.6	33543	70776.8	88272.9
277000000000	18671.6	21646	28290.7	33540.6	70945.8	88211.3
278000000000	18763.9	21672.6	28198.6	33634.6	71042.3	88233.3
279000000000	18697.1	21707	28256	33735.5	71167.5	88290.4
280000000000	18754.9	21687	28275.4	33596.4	71081.1	88279
281000000000	18817.6	21655	28314.3	33651.6	71210.2	88428.7
282000000000	18738.7	21679.9	28250.8	33698.7	71308	88437.6
283000000000	18734.2	21686.9	28268.8	33619.5	71341.7	88748.7
284000000000	18716.9	21675.2	28263.3	33754.9	71428.6	88803.2
285000000000	18738.8	21744.7	28381	33652.9	71473.5	88721.5
286000000000	18671.3	21622	28190	33792.8	71456.1	88728.8
287000000000	18767.9	21727	28314.6	33662.2	71495.3	89004.6
288000000000	18875.8	21662.9	28222.8	33787.5	71466.1	89123.4
289000000000	18721.1	21626.9	28229.4	33801.9	71640.5	89139.5
290000000000	18761.3	21743.2	28308.1	33621.6	71713.6	89149.6
291000000000	18715.6	21717.1	28294.4	33759.2	71645.6	89038.2
292000000000	18731.7	21658.7	28227.3	33793.8	71758.3	89204.7
293000000000	18866.3	21698.5	28208.3	33758.4	71766.7	89419.6
294000000000	18799.7	21632.5	28279.7	33845.9	71909.7	89279
295000000000	18774.9	21631.9	28314.4	33790	71946.9	89364.3
296000000000	18641.8	21700.4	28316.6	33775	71990	89689.7
297000000000	18667.4	21728.3	28318.9	33922.9	72116.8	89547.9
298000000000	18681	21741	28368	33895.6	72166.8	89729.8
299000000000	18852.6	21701.2	28395.7	33963.4	72202.5	89868.9
300000000000	18735.4	21743.3	28355	33973.9	72046.3	89864.7
301000000000	18813.7	21665.9	28311.9	33978.5	72235.7	90035.9
302000000000	18721.7	21672.7	28329.8	34048.2	72385.5	89771.3
303000000000	18723.4	21646.1	28383.2	33917.8	72221	89922.8
304000000000	18787.2	21657	28247.3	33910.9	72459.4	90033.8
305000000000	18840.5	21677	28398.9	33974.9	72585.8	90267
306000000000	18781.9	21754.8	28384.9	34058.5	72431.1	90148
307000000000	18807.4	21663.6	28407.4	33988.5	72489.8	90172.3
308000000000	18808.8	21740.7	28366.8	34049.8	72490.1	90395.3
309000000000	18809.8	21781.7	28392.2	34020.2	72564.2	90535.1
310000000000	18801.6	21628.3	28376.6	34083.8	72679.9	90431.5
311000000000	18699.7	21717.5	28394.5	34043.5	72936	90475.5
312000000000	18781.5	21704.6	28321.5	34001.2	72732.8	90779.5
313000000000	18770	21711.4	28368.3	34030.8	72822.1	90699.9
314000000000	18817.5	21711.1	28490.6	33901.6	72920.5	90531.2
315000000000	18758.8	21723.9	28410.8	34107.4	73020.9	90885.4
316000000000	18859.7	21722.5	28311	34254	72950.2	90935.1
317000000000	18706.4	21731.9	28371.1	34087.4	73170.2	91103.8
318000000000	18826.3	21640.4	28278.5	34126.6	73134.6	91056.5
319000000000	18746	21754.3	28443.9	34230.9	73122	90759.5
320000000000	18809.8	21733.1	28386.7	34054.3	73172.6	91405.4
321000000000	18748.9	21769.5	28413.1	34196.9	73478.1	91289.5
322000000000	18805	21710.3	28393.5	34151.5	73260.9	91197.2
323000000000	18749.6	21723.1	28428	34145.7	73325.3	91316
324000000000	18806.1	21667.2	28382.1	34138.2	73396.5	91567.1
325000000000	18837.5	21684.5	28408.6	34108.2	73394.6	91473.6
326000000000	18822.8	21690.7	28555.2	34145.2	73651.8	91618.9
327000000000	18729.4	21692.1	28474.3	34078.8	73658.1	91561.2
328000000000	18778.4	21678.4	28384.9	34338.8	73375.5	91901.4
329000000000	18807.5	21711.8	28425.9	34174.9	73590.1	91731
330000000000	18747.9	21716.5	28520	34237	73696.2	91775.7
331000000000	18776.9	21705.4	28376.7	34292.8	73713.3	91930.4
332000000000	18859.6	21758.9	28426.2	34194	73937.9	92038.6
333000000000	18818.7	21639	28439.9	34116.9	73973.9	91992.9
334000000000	18739.4	21724.9	28508.8	34225.1	74037.4	92161.1
335000000000	18875.7	21743.6	28374.5	34419.5	73921.6	92109.1
336000000000	18841.1	21785.2	28578.4	34244	73963.5	92062.6
337000000000	18728.9	21694.5	28557.1	34246.2	74060.1	92318.1
338000000000	18732.7	21714	28501.7	34327.9	74180.7	92463.3
339000000000	18795.7	21752.9	28512.5	34427.3	74128	92393.8
340000000000	18828.2	21794.5	28479.7	34313.1	74242.6	92486.8
341000000000	18841.5	21711.6	28476.7	34305.8	74192.6	92496.8
342000000000	18842.4	21719	28467.2	34452.2	74345.8	92603.2
343000000000	18751.9	21758	28526.7	34422.7	74343.4	92795.3
344000000000	18716.7	21715.5	28563.7	34409.4	74537.5	92642.5
345000000000	18844.7	21636.8	28583	34462.5	74434.8	92806
346000000000	18847.8	21814	28443.2	34411.6	74395.1	92871.2
347000000000	18727.7	21710.1	28509.2	34446.9	74508.6	92745.3
348000000000	18759.8	21647.5	28573.3	34383.4	74731.3	92780.8
349000000000	18824.8	21683.8	28558.1	34356.3	74662.5	92974.7
350000000000	18805	21726.7	28518.9	34581.8	74518.5	92972.4
351000000000	18771.6	21750.9	28472.6	34550.6	74539	93129.6
352000000000	18911.8	21730.5	28482.1	34504.6	74626.9	93111.4
353000000000	18760.8	21693.9	28571.7	34574.7	74733.4	93306.2
354000000000	18853.5	21736.3	28591.9	34512.6	74872.5	93259.8
355000000000	18863.6	21774.9	28392.5	34450.1	74871.4	93390.4
356000000000	18810.9	21741.8	28564.8	34539.1	74870.4	93380.8
357000000000	18797.9	21708.1	28559	34486.1	75062.3	93481.2
358000000000	18840	21647.9	28477.7	34402.1	75004.7	93412.1
359000000000	18812.2	21664.9	28478.8	34573.6	75229.7	93401.7
360000000000	18795.9	21792.6	28489.8	34603.6	74989.4	93568.3
361000000000	18901.7	21671.5	28602.9	34544.6	75223.2	93630.1
362000000000	18838.2	21850.2	28630.6	34533.1	75185.6	93656.6
363000000000	18830.3	21682.3	28433.4	34565.2	75263.3	93826
364000000000	18877.7	21719.7	28509.7	34648.1	75287.3	93817.4
365000000000	18872.2	21689.7	28563.6	34742.1	75377.8	93795.7
366000000000	18866.3	21801.2	28646.9	34703.5	75277.7	93941.8
367000000000	18725.7	21681.9	28501.3	34646.7	75431.7	94243.8
368000000000	18825	21819.1	28563.1	34555.9	75479.2	94173.9
369000000000	18846.6	21819.9	28575.5	34519.5	75433.4	94100.4
370000000000	18873.4	21771.2	28631.4	34759.6	75480.6	94103.8
371000000000	18843.6	21767.4	28606.8	34641.4	75601.2	94230.9
372000000000	18800.8	21769.2	28669.8	34733.6	75676	94364.6
373000000000	18888.9	21749.8	28557.6	34712.3	75603.2	94477.2
374000000000	18866.7	21773.9	28685.1	34704.9	75707.9	94125.9
375000000000	18744.9	21776.5	28605.3	34687.8	75724.6	94460.3
376000000000	18837.6	21762.2	28570	34726.9	75668.2	94498.3
377000000000	18865	21811.6	28598.1	34740.4	75746.9	94584.3
378000000000	18794.7	21663.6	28625.5	34703.4	76135.6	94643.2
379000000000	18821.6	21790.1	28717.9	34732.9	76013.1	94737.7
380000000000	18832.9	21774.6	28712.2	34806.1	75960.6	94725.2
381000000000	18807	21808.9	28735.8	34808.4	76110.7	94767.2
382000000000	18795	21802.3	28799.5	34862.6	76044	94819.9
383000000000	18888.7	21697.3	28611.4	34797.5	76134.4	94899.3
384000000000	18955.4	21800.9	28647.2	34793.5	76175.6	95074.7
385000000000	18827.5	21774.5	28630.5	34872.5	76142.4	94834.6
386000000000	18772.2	21813.2	28724.2	34900.5	76237.4	94953.9
387000000000	18755.8	21875.8	28645	34816	76209.7	95126.5
388000000000	18836.6	21651.9	28605.4	34913.1	76318	95110
389000000000	18876.1	21804	28678.9	34886.8	76389.3	95206.8
390000000000	18835.2	21788.6	28721.9	34830.6	76387.1	95296.6
391000000000	18894.5	21816.9	28675.5	34873.5	76463.1	95350.1
392000000000	18813.9	21778.9	28664	34877.9	76644.6	95336.1
393000000000	18828.7	21752.5	28719.3	34874.8	76559.3	95115.2
394000000000	18837.7	21724.3	28638.9	34850.9	76626.5	95259.6
395000000000	18830.3	21724.6	28711.4	34862.5	76600.6	95611
396000000000	18845.3	21698.3	28582.1	35047.1	76784.7	95443.2
397000000000	18883.4	21751.6	28650.9	35094.6	76672.5	95715.2
398000000000	18835.8	21791.4	28672.4	34944.7	76853.4	95662.9
399000000000	18900.9	21633.7	28577.5	35061.1	76786.7	95657.5
400000000000	18892.5	21729.3	28707.6	34995.1	76542.7	95841.3
401000000000	18887.8	21696.5	28732.4	34943.3	76903.5	95617.3
402000000000	18848.7	21753.4	28707.8	34992.1	76810.8	96054.3
403000000000	18834.6	21753.8	28766.8	34952	77083	95744.4
404000000000	18808	21761.1	28748.4	35027.4	77022.1	96001.7
405000000000	18899.7	21818.6	28778.9	35011.7	77067	95970.7
406000000000	18875.8	21753.8	28691.2	34955.4	77111.9	95982.5
407000000000	18890.5	21746.6	28748.9	35065.6	77250.9	96137
408000000000	18883.4	21791.8	28714	35142	77263.8	96150.5
409000000000	18936	21747.7	28750.6	35079.6	77132.5	96273.1
410000000000	18927.7	21862.4	28724.2	35130.8	77276.8	96066.3
411000000000	18790	21841.4	28656.7	35097.4	77141.1	96249.7
412000000000	18869.4	21821.9	28665.1	35152.1	77179.4	95993.6
413000000000	18836.5	21709.9	28713.3	35198.7	77544.9	96418.4
414000000000	18965.9	21801.4	28837.1	35165	77295.9	96331
415000000000	18884.4	21710.2	28778.8	35103.7	77413.9	96425.5
416000000000	18967.4	21646.3	28822.6	35098.6	77275.6	96473.1
417000000000	18808.9	21738	28801.3	35089.2	77421.4	96397.7
418000000000	18815.3	21724.1	28790.8	35116.6	77489.9	96586.9
419000000000	18902.9	21713.9	28845.4	35257.2	77388.7	96391
420000000000	18880.2	21755.4	28901	35114.9	77612	96591.9
421000000000	18849.9	21796.4	28816.8	35147.1	77678.9	96725.2
422000000000	18796.9	21741.7	28967.1	35101.1	77658.2	96741.3
423000000000	18918.4	21799.2	28809.8	35300.8	77794.3	96827.1
424000000000	18842.9	21746.7	28753.7	35202.3	77854.5	96680.9
425000000000	18899.7	21781.5	28723.3	35126.6	77701.4	96717
426000000000	18869.3	21783	28790.7	35216.2	77919.6	96918.4
427000000000	18891.4	21671.7	28700.4	35233.6	77803.9	96722.6
428000000000	18955.2	21808.4	28811.8	35175.2	78112.3	96884.7
429000000000	18924.7	21746.2	28780.3	35270.9	78012.6	97151.2
430000000000	18859.1	21799.1	28907.2	35299.2	78132.4	96821.2
431000000000	18812.7	21773.7	28757.9	35254.3	78124.8	97323.5
432000000000	18893.2	21815.9	28817.8	35279.2	78018.8	97090.5
433000000000	18802.5	21882.8	28814.3	35280.9	78088.1	97254.2
434000000000	18857.5	21732	28839.4	35437.3	78195.3	97179.5
435000000000	18860.5	21771	28881.7	35158.2	78198	97231.3
436000000000	18847.5	21859.8	28810.9	35404.9	78292	97296.6
437000000000	18987.2	21842.8	28856.9	35388.8	78256.1	97261.5
438000000000	18932.2	21728.2	28878.1	35405	78348.4	97327.9
439000000000	18849.3	21816.8	28866.5	35381.2	78400.9	97308.8
440000000000	18935.6	21843.4	28924.5	35384.2	78343.5	97442.4
441000000000	18927.5	21801.8	28752.9	35427.1	78407.2	97401.6
442000000000	18895.5	21830.7	28956.7	35443	78508.9	97505.8
443000000000	18848.4	21827.3	28891.1	35336.3	78505.4	97691.3
444000000000	18814.3	21836.9	28905.9	35404.6	78395.8	97708
445000000000	18848.8	21773	28826.7	35409.6	78617	97784.6
446000000000	18891.9	21743.7	28945.7	35487.2	78651.1	97682.5
447000000000	18893.8	21691.3	28839.5	35478.3	78720.6	97883.7
448000000000	18866.2	21774.2	28924.2	35496.4	78707.6	97757.9
449000000000	18879.6	21766.8	28906	35449.7	78721.6	97697.2
450000000000	18854.6	21803.4	28864.1	35455.3	78722.3	97828.3
451000000000	18942.4	21703.3	28857.3	35471.7	78752.5	97897.4
452000000000	18973.3	21797.6	28891.4	35581.9	78646.4	97909.3
453000000000	18890.4	21849.6	28868.2	35545.4	78899.7	97987.9
454000000000	18872.4	21836.1	28885.2	35499.4	78778.7	97976
455000000000	18925.4	21682.6	28853.9	35528.7	78815.1	98032.7
456000000000	18889.1	21789.5	28911.5	35532.9	78870.9	98041.6
457000000000	18880.3	21833.1	29025.3	35470.7	78991.4	98120.5
458000000000	18892.3	21763.4	28926.1	35492.1	78998.3	98142.9
459000000000	18925.5	21832.1	29017.4	35626.7	79189.6	98214.4
460000000000	18827.9	21732.2	28865.2	35459.9	78898	98449.5
461000000000	18935.5	21829.3	28889.9	35561.9	79051	98234.5
462000000000	18993.2	21812.9	28941.6	35655.3	79237.9	98426.9
463000000000	18848.7	21724.9	28905	35572.7	79220.7	98248.6
464000000000	18860.8	21859.6	28875.7	35531	79239.7	98342.3
465000000000	18879.5	21788.6	28919.8	35592.3	79219.7	98486.8
466000000000	18948.6	21761.4	29048.3	35591.2	79384.8	98442.1
467000000000	18929.9	21814.2	29058.3	35576.4	79424.3	98482.5
468000000000	18851.1	21902.2	28967.7	35588.1	79422.4	98569.4
469000000000	18927.2	21725.7	28968.9	35779.6	79452	98580.9
470000000000	18912.7	21789.9	29009.4	35652.8	79459.9	98720.4
471000000000	18907.7	21758.5	28818.2	35663.9	79675	98704.5
472000000000	18908.3	21896	28996.3	35724.5	79514.4	98691.7
473000000000	18814.4	21818.6	29008.9	35684.7	79486	98595.1
474000000000	18926.5	21797.2	28906.8	35808.8	79460	98683.1
475000000000	18926.7	21707.5	28969.4	35668.4	79392.7	98861.3
476000000000	18868.4	21813.9	28965.3	35663.4	79555	98865.3
477000000000	18932.4	21818.2	29067.9	35681.3	79343.1	98931.1
478000000000	18957.4	21742.8	29041.9	35724.4	79700.5	98828
479000000000	18917.3	21790.4	29014.5	35589.1	79737.2	98937.6
480000000000	18890.4	21776.7	29052.1	35766.2	79376.5	98952.6
481000000000	18966.4	21903.7	28937.9	35794.8	79801.7	98769.5
482000000000	18862.8	21848.3	29091	35731.8	79718	99051.6
483000000000	18930.1	21739.5	29052.3	35642.7	79680.2	99164.3
484000000000	18808.3	21774.1	29140.9	35639.9	79844.4	99202
485000000000	18894.8	21867.1	29049.5	35771.8	79881.3	99224.5
486000000000	18805.2	21946.3	29127.4	35833.8	79915.3	99255
487000000000	18982.5	21866.3	29008.3	35625.3	80029.9	99426.4
488000000000	18936.7	21866	29033.7	35757.7	80102.6	99287.4
489000000000	18847.7	21840.7	29019.2	35779.4	80223.7	99356.1
490000000000	18944.8	21866.3	29012.3	35864.3	80089.2	99375.4
491000000000	18820.9	21822.8	29082.7	35859.3	80001.2	99643.5
492000000000	18872.3	21760.9	29047.6	35869.7	80088.3	99499.5
493000000000	18937.6	21783.7	29115.8	35906.1	80214.1	99741.7
494000000000	18944.2	21728	29031.5	35935	80052.7	99544
495000000000	18895.8	21772	29066.7	35830.5	80128.3	99639.1
496000000000	18818.6	21802.8	29087.5	35822.1	80347.1	99363.1
497000000000	18998.3	21797.8	29114.7	35930.3	80457.5	99769.6
498000000000	18967.2	21803.6	29034.2	35866	80354.9	99421.2
499000000000	18884.8	21779.4	29169.2	35876.1	80483.5	99531.6
500000000000	18822.7	21831.4	29124.2	35893.6	80488.9	99590.6
501000000000	18951	21857.5	29093.6	35946.7	80383.4	99774.5
502000000000	19009.1	21841.8	29083.2	35972.8	80520.2	99614.8
503000000000	18855.3	21835.3	29116.5	36018.8	80291	99603.7
504000000000	18990.9	21726.4	29103	36059.9	80504.6	99817.9
505000000000	18947.7	21750.3	29116.7	35927.4	80618.1	99626.7
506000000000	18921.3	21829.1	29033.4	35991.2	80511.2	99754
507000000000	18908.2	21852.1	29032.2	35961.8	80546.2	99826.4
508000000000	19014.4	21748.7	29146.3	35988.8	80788.7	100010
509000000000	18925.4	21842.6	29073.3	36006.5	80494.3	100125
510000000000	18950.7	21808	29160.9	36056.5	80706.7	99970
511000000000	18935.9	21877.7	29021.6	36145.8	80628.1	100037
512000000000	18945.9	21870.6	29034	35930.5	80741.4	100052
513000000000	18944.7	21774.9	29179.3	35992.2	80904.8	100041
514000000000	18888.9	21794.9	29168.1	35981	80555	100182
515000000000	18903.6	21878.3	29178.1	35966.8	80827.5	100010
516000000000	18912.3	21918.5	29172.3	36069.7	80850.3	100070
517000000000	19015.2	21857.5	29175.1	36103.9	80907	100245
518000000000	18944.3	21805	29063.4	36053.4	80861.8	100180
519000000000	18923.1	21762.4	29132.9	36220	80929.7	100448
520000000000	18903.6	21907.1	29233.9	36088.8	80929.5	100334
521000000000	19008.3	21901.3	29144.4	35997.9	81152.5	100378
522000000000	18889.2	21827.6	29209.4	36145.2	81201.7	100215
523000000000	18978.1	21788.5	29237.1	36187.3	81054.6	100382
524000000000	18896.7	21825.4	29242.3	36218.6	81132.1	100318
525000000000	18898.4	21823.7	29167.2	36191.1	81190.4	100757
526000000000	18883.5	21883.7	29205.2	36185.9	81173.5	100339
527000000000	19049.1	21747.4	29100	36160.7	81258.4	100619
528000000000	18862.8	21907.5	29333.6	36033.6	81169.5	100497
529000000000	18959.9	21864.8	29074.4	36205.6	81237.9	100535
530000000000	18857.8	21766.5	29347.3	36125.8	81180.6	100738
531000000000	18984.5	21801.9	29268.9	36114	81198.3	100496
532000000000	18918.5	21804.5	29191.1	36224.1	81255.1	100724
533000000000	18921.6	21788	29231.7	36207.9	81326.2	100612
534000000000	18995.5	21835.8	29172.5	36264.4	81274.9	100931
535000000000	18865.1	21766.3	29201.7	36086.4	81296.9	100841
536000000000	19019.3	21854.7	29251.8	36161.8	81532.1	100975
537000000000	18929.6	21878.8	29293.3	36152.6	81384.5	100736
538000000000	18994.8	21888.1	29173.6	36233.5	81573.6	100931
539000000000	18941.9	21832.4	29196.9	36156.4	81510.7	101066
540000000000	18875.3	21767.8	29226.3	36118.4	81443.2	100667
541000000000	19001.6	21970.8	29272.9	36263.7	81585.9	101161
542000000000	18970.3	21772.5	29209.6	36297.1	81646.6	100858
543000000000	18986.1	21964.3	29274	36333.2	81793	101007
544000000000	18979.9	21795.4	29296.5	36205.1	81705.4	101035
545000000000	18995.9	21831.6	29349.8	36236.3	81628.1	101030
546000000000	18998.4	21834.7	29261.1	36258.2	81670.2	101203
547000000000	18934	21860.1	29288.1	36296.9	81677.9	101076
548000000000	19011.1	21851	29423.4	36277.7	81805.8	101254
549000000000	18979.7	21797.7	29200.1	36325.5	81817	101304
550000000000	18944.5	21851.4	29274.8	36374.2	81994.8	101319
551000000000	18916.2	21800.2	29281.6	36374.9	81819.4	101450
552000000000	19018.1	21766.7	29372.7	36311.2	81873.3	101282
553000000000	18982.2	21841.4	29352.9	36429.5	81981	101375
554000000000	18860.4	21846.8	29283.2	36419.9	81805.8	101387
555000000000	19002.8	21803.8	29335.2	36462.6	81963.3	101461
556000000000	18979.2	21838.4	29433.4	36383.8	81887.8	101389
557000000000	18972.8	21849.7	29348.5	36390.9	82058.6	101394
558000000000	18903.7	21896.2	29315.5	36472.7	82097.2	101525
559000000000	18928.9	21784.7	29286.9	36431.9	81953.1	101428
560000000000	19008.9	21858.8	29283.4	36393	82238.5	101552
561000000000	18904.4	21840.5	29298.4	36408.5	82033.8	101347
562000000000	18966.4	21962.4	29260.6	36361.3	82084	101502
563000000000	18876.2	21814.9	29305.2	36521.9	82050.2	101687
564000000000	18907.6	21765.7	29300.2	36495.6	82226.8	101703
565000000000	18978.2	21825	29342.7	36595.6	82335.2	101604
566000000000	18925.4	21841.7	29383.7	36443.6	82165.8	101693
567000000000	18972.2	21920.9	29439.3	36449.9	82358.3	101815
568000000000	18945.8	21897.9	29460.5	36518.8	82459.9	101616
569000000000	18942.7	21850.4	29431.4	36523	82445.1	101969
570000000000	19012.7	21877.1	29304.8	36454.7	82524.4	101796
571000000000	18913.1	21879.9	29356.6	36417.7	82383	101694
572000000000	18947.5	21943.2	29399.2	36475	82493	101741
573000000000	18980.8	21831.8	29464.2	36456.8	82370.8	101928
574000000000	18959.1	21817.7	29334.9	36509.1	82268.5	101969
575000000000	18924.7	21808.8	29347.5	36571.6	82478.6	101964
576000000000	18878.9	21882.4	29363	36536.9	82683.2	102020
577000000000	18883.5	21802.4	29499.1	36543.3	82617.2	102206
578000000000	18911.5	21940.6	29370.9	36591	82565.2	102038
579000000000	18852.1	21824.5	29379.1	36560	82642.5	102067
580000000000	19005.1	21835.7	29399.7	36703.7	82710.1	102142
581000000000	18928.2	21827.4	29363.1	36551.4	82778.1	102148
582000000000	18898.7	21849.2	29364.1	36632	82862.6	102157
583000000000	18987.2	21807.6	29457.3	36545.2	82928.1	102004
584000000000	19008.3	21854.7	29488.9	36627.4	82837.8	102146
585000000000	18945.5	21970.3	29447.1	36636.7	82655.6	102320
586000000000	19070.3	21805.5	29455	36771	82620.7	102166
587000000000	18989.1	21856.6	29376.7	36614.2	82847.6	102280
588000000000	18941.5	21837.8	29450.6	36714.3	82777	102207
589000000000	18936.3	21873.4	29414.8	36803.5	83079.5	102128
590000000000	18988.5	21843.9	29587.6	36648.3	82805	102324
591000000000	18980.7	21838.9	29441.1	36662.2	82784.8	102387
592000000000	18942	21880.6	29464.6	36819.3	82993.4	102310
593000000000	18977.4	21973.7	29528.3	36713.9	82914.1	102435
594000000000	18996.1	21814.8	29517.6	36659.3	83159.8	102524
595000000000	18931.9	21825.1	29546.4	36730.4	82997.8	102419
596000000000	19060.8	21848.1	29632.7	36718.1	83052.6	102395
597000000000	18952.7	21878.3	29492.4	36741.6	83236.6	102641
598000000000	18975.2	21840.3	29485.9	36766	83092.8	102373
599000000000	18980.7	21897.9	29399.2	36838.8	83048.9	102645
600000000000	19010.2	21863.9	29446.6	36754.5	82985.3	102604

## Sheet: Sheet1
Time(s)	0uM:80uM::DMPG:DMPC	1uM:80uM::DMPG:DMPC	5uM:80uM::DMPG:DMPC	10uM:80uM::DMPG:DMPC	20uM:80uM::DMPG:DMPC	30uM:80uM::DMPG:DMPC
0	18251.8	20213.2	23987.3	25514.1	47456.6	49336.7
1	18262	20190.3	24147.4	25559.5	47744.7	49587.9
2	18253.7	20184.1	24196.8	25693.8	47909.9	49908.1
3	18248.3	20213	24241.3	25767.3	48197.5	50300.8
4	18327	20167	24299.7	25846.2	48320.6	50448.9
5	18273	20297.6	24301.5	25921.7	48677.6	50745.6
6	18306	20295	24452.7	25941.5	48913.6	51096.4
7	18284.1	20174.1	24416.2	26019.1	49106.4	51205.8
8	18271.9	20263.5	24505.1	26049.4	49426.2	51580.2
9	18295	20325.9	24587.8	26190.7	49508.2	51909.5
10	18279.5	20278.3	24589.1	26405.8	49701	51957.8
11	18396.2	20281.8	24717.8	26414.5	49966	52089.2
12	18305.3	20377.1	24781	26493.5	50148.9	52439.7
13	18176.6	20338.7	24746.4	26496.4	50229.4	52710.7
14	18301.4	20323.4	24738.9	26625.2	50434.4	52983.8
15	18347.5	20396.5	24868.9	26671.6	50665.8	53246.3
16	18243.1	20376.1	24978.4	26677.9	50841.1	53936.1
17	18303.6	20471	24979.4	26763.7	50991.5	53999.2
18	18349.1	20447.6	25035	26871.9	51131.2	54087.5
19	18338.4	20526.9	25097.3	26967.3	51219.1	54415.9
20	18309.9	20554	25133	26930.3	51436.6	54786.7
21	18322.8	20455.6	25104.4	27024.4	51624.4	54753.9
22	18404.9	20545.3	25317.5	27053.1	51463.1	55038.9
23	18314.2	20447	25283.6	27145.1	51800	55114.4
24	18306	20504.9	25255	27135.3	51886.8	55447
25	18299.3	20562.9	25312.6	27189.1	52052.3	55695.8
26	18329.1	20583.5	25279.2	27336.7	52292.4	55737.1
27	18279	20535.9	25419.3	27292.2	52329.7	55872.1
28	18243.8	20594.4	25452.2	27418	52523.1	56115.4
29	18385.7	20521	25619.5	27420	52543.6	56512.7
30	18299.2	20563.5	25498.8	27483.9	52814.4	56595.2
31	18341.7	20576	25546.9	27482	52903.8	56756
32	18404.5	20588.1	25564.7	27628.6	53047.3	56886.5
33	18281	20680.9	25594	27677.7	53112.1	57072.3
34	18287.8	20641.2	25655.2	27736.1	53237.5	57435.2
35	18285.1	20628	25717.2	27820.3	53406.9	57478.6
36	18281.9	20733.1	25740.7	27781.8	53553.9	57852.6
37	18331	20711	25740.5	27856.8	53537.2	57854.9
38	18350.6	20771	25718.4	28005.5	53629.5	58024
39	18319.8	20714.3	25721.2	27966.6	53876	58295.3
40	18336	20724.9	25859.3	28005.1	53830	58318
41	18377.8	20710.7	25852.4	27901.7	54045.4	58632
42	18351.3	20731.3	25891.9	28175.2	54052.8	58778.5
43	18331.9	20675	25953.1	28279.3	54312.4	58802.3
44	18364.5	20798.7	26008.4	28233.1	54325.4	58954
45	18341.3	20768.5	25915.5	28273.3	54353.5	59342.7
46	18251.4	20798.1	25908.7	28220.8	54564.1	59410.3
47	18419.7	20746.9	26044.6	28380.6	54691.8	59512.1
48	18369.1	20815.6	26115.2	28360.6	54761.5	59624.6
49	18363.4	20854.8	25939.6	28377.8	54869.6	60107.6
50	18356.6	20770.9	26010	28359.2	54954.8	60034.7
51	18356.4	20752.5	26145.7	28628.2	54955.8	60200.1
52	18328.2	20792	26045.9	28517.7	55137.7	60422.9
53	18378.8	20758.1	26042.9	28588.4	55313.2	60545.4
54	18428	20833.5	26164.4	28457.6	55298.9	60740.1
55	18385.6	20877.7	26095.6	28621	55435.3	61092.6
56	18337.5	20866.8	26175.7	28681.5	55640.1	61012.6
57	18422.3	20839.5	26201.5	28786.9	55670.1	61228.3
58	18396.8	20866.5	26264.3	28793	55938.9	61437.6
59	18321.3	20932.9	26334.1	28746.5	55964.5	61633.5
60	18411.8	20933	26364.9	28878.7	55874.4	61783.6
61	18386.9	20820.8	26331.6	28800.3	56121.6	62020.5
62	18421.7	20918.9	26215.1	28875.4	56008.6	62074.4
63	18336.5	20917.4	26403.6	28953.4	56196.8	62252.8
64	18451.3	20884.8	26253.5	28970.5	56162.6	62391.5
65	18388	20967.4	26460.4	29109.1	56376.9	62637
66	18439.4	21000.4	26490.3	29097.6	56493.8	62888
67	18458.2	20875.2	26513.1	29074.4	56491.5	62913.9
68	18402.1	21023.5	26411.1	29160.2	56520.7	62947.1
69	18377.6	20991.8	26517.4	29151.9	56601.3	63076.6
70	18364.3	20984.5	26521.5	29200.4	56718.1	63500.8
71	18447.1	20916.5	26513.2	29174.2	56725.1	63585.5
72	18407.9	20962.2	26545.8	29155.7	57101.4	63616
73	18395.5	20988.7	26569.5	29295	57009	63715.6
74	18463.2	21005.9	26616.6	29283.1	57216.6	64105.4
75	18432.6	20907.3	26528.3	29336.2	57266.6	64233.9
76	18442.4	20974.3	26554.2	29222.4	57216.3	64384.7
77	18469.9	21011.4	26601.7	29437	57318.4	64517.9
78	18510.2	20900	26619.1	29532.9	57425.6	64630.8
79	18471.2	21037.4	26665.8	29530.4	57786.4	64877.6
80	18370.5	20998.7	26720.4	29608.6	57746.5	64868.9
81	18474.7	21035.5	26592.9	29505.8	57723	65001.3
82	18527.2	21048.6	26769.5	29485.3	57828.3	65184.1
83	18431.2	21131.9	26681.4	29612.9	57850.3	65534.1
84	18427	21118.9	26734.5	29703.4	58014.8	65341.9
85	18482.7	21138	26697.9	29785.5	58063.9	65662.4
86	18352.2	21087.7	26654	29704.2	57993.1	65912.9
87	18494.3	21037	26753.7	29741.9	58133.3	65983.2
88	18539.8	21055	26793.7	29860.1	58309.2	66096.1
89	18455.5	21020.4	26797	29828.1	58474.5	66222.1
90	18472.9	21099.6	26849.1	29906.7	58627.5	66624.5
91	18421.7	21140.6	26826.9	29878.9	58415.3	66738.7
92	18461.7	21111.4	26837.1	29887.9	58662.8	66875.8
93	18389.1	21127.3	26861.2	29994.3	58619.9	67054.5
94	18493.7	21180.6	26948.5	29968.1	58714.1	67238
95	18350.6	21117.9	26884.3	30175.6	59008.3	67004.4
96	18471.2	21239	26915.5	30006.2	58788.9	67532.4
97	18514.5	21089.2	26942.7	29997.3	58985.6	67602
98	18451.4	21130.9	26907.9	30035.8	58923.4	67697.7
99	18504.8	21194.2	26966.2	30029.2	59223.5	67910.2
100	18478.3	21074	27015.2	30120.1	59179.7	68007.5
101	18484.3	21181.9	27014	30223.5	59240.4	68115.8
102	18452.9	21154.9	26980	30185.1	59492.4	68300.7
103	18463.1	21218.4	27006.4	30191.2	59503.6	68303.1
104	18428.5	21113.6	27045	30334.7	59556.5	68505.5
105	18414.8	21105.3	27010.3	30124.6	59558.2	68531.7
106	18439.2	21167.4	27031	30269.2	59795	68857.2
107	18394.9	21228.6	27063.9	30330.7	59924.3	69059.1
108	18532.9	21204.5	26993.6	30290.9	59822.5	69010.9
109	18403.4	21172	27069.8	30320	59886.8	69165
110	18463.4	21178.4	27174.5	30423.6	60053.3	69343.5
111	18514.3	21249.3	27074.2	30411.8	60020.3	69631.5
112	18508.8	21237.2	27139.6	30444.8	60264.9	69660.9
113	18461.6	21275.7	27118.5	30585.1	60202.9	69887.1
114	18456.8	21184.8	27135.6	30595.2	60304.7	69887
115	18539.5	21231.6	27181.1	30649	60393.2	70219.9
116	18539.2	21234.6	27211.7	30658	60575.2	70282.2
117	18442.1	21278.9	27217.7	30644.5	60510.6	70447.9
118	18513.5	21244	27195	30717	60592.5	70669.8
119	18434.9	21167.1	27181.3	30666.4	60538.1	70797.1
120	18443.3	21237	27146.1	30706.4	60756.2	70910.8
121	18544.9	21174.7	27184.7	30688.4	60750.9	70945
122	18517.5	21206.5	27256.8	30820.9	60892.7	71296.8
123	18496.3	21323.4	27278.5	30865.9	61022.6	71435.3
124	18544.8	21298.9	27241.8	30784	61052.9	71498
125	18526.8	21312.5	27211.2	30790.9	61163.6	71427.8
126	18482.9	21329.8	27319.9	30765.6	61336.8	71947.3
127	18551.5	21298.7	27342.8	30922.7	61180.9	71724.9
128	18486.7	21230.1	27315.3	30960.4	61333.4	71967
129	18486.4	21219.7	27271.8	30858.2	61356.5	72270
130	18533.9	21302.6	27388.1	30880.1	61520.6	72131.3
131	18496.2	21332.6	27221.6	30813.1	61585.3	72456.7
132	18576.5	21233.8	27334.7	30929.3	61589.6	72520.4
133	18552.4	21267	27353.7	31035.9	61707	72714.4
134	18537.8	21403.3	27283.2	31083.4	61861.4	72736.4
135	18495	21359.2	27382.4	31148.3	61845.3	72963.1
136	18567.9	21230.9	27470.8	31231.7	61980.7	73098.9
137	18560.1	21422.7	27335.3	31196.1	61979.6	73260.8
138	18491.4	21332.7	27347.2	31178.1	62032.2	73237.9
139	18452.7	21470.3	27384.7	31163.6	62102.2	73491.4
140	18429.2	21355.9	27405.8	31241.1	62141.2	73656
141	18627.2	21366	27449.3	31199.8	62364.3	73742.7
142	18603.8	21390.6	27427.4	31258.1	62284.7	73818.5
143	18571.7	21269.2	27446.8	31268	62417.5	73960.9
144	18488.5	21404	27462	31337	62462.1	74154.9
145	18512.1	21296.8	27398.5	31375.2	62593.3	74379.7
146	18667.8	21250.5	27488.5	31292.8	62671.5	74411.4
147	18538.7	21363.6	27362.1	31276.5	62681.5	74479.7
148	18520.9	21290.6	27416.9	31257	62700.2	74795.4
149	18565.1	21329.8	27403.5	31412.5	62862.1	74850
150	18552.4	21399.9	27490.9	31416.9	62887.7	75066.6
151	18569.6	21437	27526.1	31552.5	62936.6	75088.1
152	18571	21374.7	27452.5	31472.6	63072.2	75161.1
153	18594.3	21407	27451.2	31387	63129.2	75252.9
154	18540.2	21431.3	27534.1	31591.8	63214.5	75488.3
155	18508	21398.7	27490.3	31493.8	63028.7	75638.8
156	18562.5	21365.5	27516	31671.8	63388.5	75865.4
157	18612.2	21432.4	27570.2	31587.7	63229.1	75856.4
158	18551	21399	27574.3	31609.8	63511	75929.8
159	18587.7	21455.7	27492.2	31733.4	63335.1	76281.3
160	18549.5	21319.7	27624.5	31666.8	63590	76232.9
161	18674.9	21458.6	27561.2	31616.6	63755.8	76149.2
162	18461.7	21473.5	27652.5	31770.3	63699.7	76635.8
163	18581.9	21450.8	27653	31772.3	63877.5	76541
164	18563.9	21392.8	27616.3	31734	63901.1	76675.5
165	18631.5	21399.9	27667.7	31709.3	64054.8	76789.9
166	18572.9	21385.5	27692.7	31827.2	64086.3	76827.3
167	18595.1	21420.8	27687.7	31749.1	64084.7	77205.4
168	18580.2	21387.6	27636.8	31826.3	64140.8	77163.7
169	18512.9	21388.8	27636.4	31844.2	64448	77346.7
170	18562	21471.6	27653.7	31918.8	64379.4	77655.3
171	18575.1	21488.5	27662.5	31874.4	64446.6	77634.9
172	18595.8	21433.3	27762.2	31854	64481.2	77696.9
173	18585.1	21349.4	27652	31844.6	64499.7	77871.9
174	18620.4	21514	27654.2	31925.8	64419.4	77887.6
175	18685	21410.8	27590.6	31853.1	64678.9	78191.4
176	18661.9	21418.4	27667.1	31878.1	64654.5	78325.2
177	18580.7	21517.1	27618.4	31964.8	64863.4	78474
178	18595	21494.6	27766.4	32075.1	64981	78315.8
179	18616.9	21428	27798.6	32049	64786.7	78651.3
180	18677	21447	27641.6	32001.5	65035	78897.3
181	18518.1	21459.6	27732.3	32087.7	65049.1	78891.2
182	18593.3	21533.1	27825.6	32208.9	65168	78920.2
183	18548.1	21483.4	27661.9	32116.1	65122	78850.7
184	18529.5	21583.7	27833.5	32158	65153	79259
185	18688.9	21514.4	27809.3	32187.8	65299.6	79385.9
186	18538.9	21496.8	27623.3	32246.8	65508.7	79323.6
187	18643	21504.9	27746.1	32130.6	65561.3	79535.8
188	18647.4	21495.5	27770.2	32227.9	65508.6	79486.8
189	18569.3	21558.8	27894.1	32251.6	65600.5	79707
190	18624.2	21527.8	27842.8	32198.3	65718.7	79839.8
191	18655.3	21531.3	27741.7	32242.5	65607	79988.4
192	18585.5	21542.9	27761.6	32256.8	65790.1	79960.4
193	18630.8	21436.3	27815.8	32334	65926.4	80153.8
194	18634.1	21581.4	27788.9	32288.7	65884.7	80341.2
195	18615.9	21496.2	27831.1	32311.1	66019.4	80299.2
196	18613.4	21620.5	27834	32354	66256.4	80558.3
197	18611.2	21548.7	27825.4	32359.8	66072.7	80583.6
198	18583	21603.5	27899.4	32331.2	66115.4	80713.8
199	18628.7	21601.7	27757.8	32311	66164.5	80979.8
200	18675.5	21500.8	27828.8	32380.9	66264.8	80875.5
201	18551.2	21494.2	27789.4	32440.9	66293.8	81050.1
202	18621.8	21444.7	27875.7	32423.2	66350.2	81114.4
203	18644.4	21508.2	27980.2	32524.9	66480.9	81172.2
204	18575.5	21527.1	27888.3	32361.1	66530.6	81414.6
205	18666.4	21571.5	27882	32516.6	66706.9	81549.2
206	18629.6	21486.4	27813.6	32443.6	66545.5	81515
207	18642.3	21451.2	27923.3	32507.2	66778.4	81785.5
208	18688.8	21561.5	27908.4	32629.6	66669.4	81910.1
209	18666.7	21551.9	27923.3	32470.6	66758.4	82037.8
210	18647.7	21566.6	27872.5	32480.7	67092.8	81952
211	18643.1	21524.4	27946.6	32622.2	67119.6	82155.4
212	18760.2	21593.1	27926.9	32577.7	67071.2	82176
213	18689.8	21608.7	27905.4	32536.4	67324.8	82485.3
214	18544.2	21536.4	28034.9	32620.2	67117.2	82455.6
215	18569.8	21606.2	27979.6	32507.6	67417.1	82481.7
216	18735.7	21521.6	28001.8	32755.5	67360.8	82548.6
217	18720.2	21622.6	27959.8	32684	67517.9	82776
218	18664.3	21543.4	27890.4	32699.1	67396	82851.8
219	18572.3	21591.3	27871.3	32856.6	67562.2	82808.8
220	18628.4	21543.6	28031.8	32782.4	67568.6	82957.1
221	18661.4	21586.2	27990	32749.4	67676.5	83075.1
222	18715.6	21611.7	27908.1	32740	67919.1	83221.7
223	18639.4	21563.5	27968.3	32724.9	67865.7	83409.2
224	18641.6	21455	28032.7	32912.1	67812.9	83492.7
225	18696.4	21619.7	27919.6	32795.7	67679.7	83617.7
226	18725.4	21533.4	27929.4	32902.4	67855.8	83694.8
227	18656.6	21576.9	27932	32932.2	67881.4	83597.4
228	18735.2	21609.9	27950.8	32818.7	68172.6	83702.4
229	18693.9	21521.6	28101.4	32834.7	68107.8	84001.7
230	18718.1	21520.7	28037	32876.8	68111.1	84009.7
231	18715.2	21543.5	27990.2	32925.3	68231.5	84083.7
232	18662.3	21544	28090.9	32824.5	68260.6	84394.2
233	18706	21529.9	28118.9	32888.9	68275.5	84354.2
234	18715.9	21600.4	27999.5	32904.2	68409.8	84373.1
235	18725.6	21579.1	28048.5	33011.3	68525.1	84442.4
236	18599.1	21608.1	28072.2	32957.1	68623.4	84678.6
237	18733.9	21679	28083.7	32976.6	68632.5	84778.6
238	18730	21608.4	28116.1	33017.9	68723.9	84879
239	18718.9	21630.1	28147.7	33095.7	68738.7	84848
240	18709.1	21520.6	28053.4	33167.6	68752.9	84871
241	18779.1	21600.2	28039.5	33038.6	68813.7	85098.1
242	18690.5	21610.3	28204.1	33166.2	68829.1	85143.7
243	18661.4	21565.9	28075.4	33099.3	68921	85169.1
244	18680.3	21594.4	28111.6	33123.1	69216.5	85412.6
245	18637.1	21619.9	28085.4	33213.8	69123	85438.2
246	18747.7	21707.2	28069.8	33074.7	69174.2	85486.8
247	18672.8	21606	28171.7	33143.1	69177.7	85656.9
248	18634.4	21648	28033.3	33305.5	69298.3	85579.4
249	18689.6	21625.5	28046.8	33159.9	69373.7	85688.9
250	18735.5	21666.8	28213.3	33261.3	69448.2	85930.3
251	18692.1	21602.5	28230.7	33241.4	69342.1	85898.7
252	18750.2	21673.9	28230.2	33072.8	69523.5	85965.2
253	18608.8	21750.9	28172.5	33198.5	69580	85960.7
254	18758.5	21630.8	28119.7	33201.5	69772.4	86188.1
255	18761.5	21658.1	28107.4	33365.4	69851.6	86234.1
256	18739.4	21675.6	28103	33309.1	69721	86483.3
257	18642.7	21662.2	28193.4	33253.8	69759.1	86258.8
258	18734.7	21554.6	28060.9	33277.2	69825.7	86638.8
259	18720.9	21678.2	28103.6	33363.7	69887.4	86548.9
260	18702	21641.2	28233.9	33258.5	69934.6	86917.1
261	18671.4	21735.2	28110.2	33388.2	70081.5	86738
262	18727.5	21679.6	28161.9	33383.4	70149.8	86748.3
263	18671.5	21606	28216.1	33353	70132.7	86978.1
264	18653.9	21650	28109.5	33459.7	70297.4	87037.3
265	18674.6	21680	28100.1	33436.4	70314.5	87094.8
266	18701	21628.2	28174.9	33414.1	70380.7	87209
267	18777.5	21610.9	28145.8	33386.2	70287.9	87302.1
268	18804.6	21709.5	28178.8	33477.8	70357.2	87303.6
269	18731	21661.1	28078.7	33508.3	70548.3	87466.4
270	18692.1	21739	28136.1	33506.9	70695.2	87492.9
271	18739.4	21629.6	28178.4	33536.6	70666	87727.1
272	18779	21608.9	28193.8	33495.1	70630.5	87709.1
273	18736.8	21593.3	28254.4	33502.9	70880.2	87833.6
274	18633.2	21708	28281.6	33572.6	70852.4	87926.2
275	18777.8	21571	28212.3	33656.4	70817	88115.8
276	18667.2	21768.4	28210.6	33543	70776.8	88272.9
277	18671.6	21646	28290.7	33540.6	70945.8	88211.3
278	18763.9	21672.6	28198.6	33634.6	71042.3	88233.3
279	18697.1	21707	28256	33735.5	71167.5	88290.4
280	18754.9	21687	28275.4	33596.4	71081.1	88279
281	18817.6	21655	28314.3	33651.6	71210.2	88428.7
282	18738.7	21679.9	28250.8	33698.7	71308	88437.6
283	18734.2	21686.9	28268.8	33619.5	71341.7	88748.7
284	18716.9	21675.2	28263.3	33754.9	71428.6	88803.2
285	18738.8	21744.7	28381	33652.9	71473.5	88721.5
286	18671.3	21622	28190	33792.8	71456.1	88728.8
287	18767.9	21727	28314.6	33662.2	71495.3	89004.6
288	18875.8	21662.9	28222.8	33787.5	71466.1	89123.4
289	18721.1	21626.9	28229.4	33801.9	71640.5	89139.5
290	18761.3	21743.2	28308.1	33621.6	71713.6	89149.6
291	18715.6	21717.1	28294.4	33759.2	71645.6	89038.2
292	18731.7	21658.7	28227.3	33793.8	71758.3	89204.7
293	18866.3	21698.5	28208.3	33758.4	71766.7	89419.6
294	18799.7	21632.5	28279.7	33845.9	71909.7	89279
295	18774.9	21631.9	28314.4	33790	71946.9	89364.3
296	18641.8	21700.4	28316.6	33775	71990	89689.7
297	18667.4	21728.3	28318.9	33922.9	72116.8	89547.9
298	18681	21741	28368	33895.6	72166.8	89729.8
299	18852.6	21701.2	28395.7	33963.4	72202.5	89868.9
300	18735.4	21743.3	28355	33973.9	72046.3	89864.7
301	18813.7	21665.9	28311.9	33978.5	72235.7	90035.9
302	18721.7	21672.7	28329.8	34048.2	72385.5	89771.3
303	18723.4	21646.1	28383.2	33917.8	72221	89922.8
304	18787.2	21657	28247.3	33910.9	72459.4	90033.8
305	18840.5	21677	28398.9	33974.9	72585.8	90267
306	18781.9	21754.8	28384.9	34058.5	72431.1	90148
307	18807.4	21663.6	28407.4	33988.5	72489.8	90172.3
308	18808.8	21740.7	28366.8	34049.8	72490.1	90395.3
309	18809.8	21781.7	28392.2	34020.2	72564.2	90535.1
310	18801.6	21628.3	28376.6	34083.8	72679.9	90431.5
311	18699.7	21717.5	28394.5	34043.5	72936	90475.5
312	18781.5	21704.6	28321.5	34001.2	72732.8	90779.5
313	18770	21711.4	28368.3	34030.8	72822.1	90699.9
314	18817.5	21711.1	28490.6	33901.6	72920.5	90531.2
315	18758.8	21723.9	28410.8	34107.4	73020.9	90885.4
316	18859.7	21722.5	28311	34254	72950.2	90935.1
317	18706.4	21731.9	28371.1	34087.4	73170.2	91103.8
318	18826.3	21640.4	28278.5	34126.6	73134.6	91056.5
319	18746	21754.3	28443.9	34230.9	73122	90759.5
320	18809.8	21733.1	28386.7	34054.3	73172.6	91405.4
321	18748.9	21769.5	28413.1	34196.9	73478.1	91289.5
322	18805	21710.3	28393.5	34151.5	73260.9	91197.2
323	18749.6	21723.1	28428	34145.7	73325.3	91316
324	18806.1	21667.2	28382.1	34138.2	73396.5	91567.1
325	18837.5	21684.5	28408.6	34108.2	73394.6	91473.6
326	18822.8	21690.7	28555.2	34145.2	73651.8	91618.9
327	18729.4	21692.1	28474.3	34078.8	73658.1	91561.2
328	18778.4	21678.4	28384.9	34338.8	73375.5	91901.4
329	18807.5	21711.8	28425.9	34174.9	73590.1	91731
330	18747.9	21716.5	28520	34237	73696.2	91775.7
331	18776.9	21705.4	28376.7	34292.8	73713.3	91930.4
332	18859.6	21758.9	28426.2	34194	73937.9	92038.6
333	18818.7	21639	28439.9	34116.9	73973.9	91992.9
334	18739.4	21724.9	28508.8	34225.1	74037.4	92161.1
335	18875.7	21743.6	28374.5	34419.5	73921.6	92109.1
336	18841.1	21785.2	28578.4	34244	73963.5	92062.6
337	18728.9	21694.5	28557.1	34246.2	74060.1	92318.1
338	18732.7	21714	28501.7	34327.9	74180.7	92463.3
339	18795.7	21752.9	28512.5	34427.3	74128	92393.8
340	18828.2	21794.5	28479.7	34313.1	74242.6	92486.8
341	18841.5	21711.6	28476.7	34305.8	74192.6	92496.8
342	18842.4	21719	28467.2	34452.2	74345.8	92603.2
343	18751.9	21758	28526.7	34422.7	74343.4	92795.3
344	18716.7	21715.5	28563.7	34409.4	74537.5	92642.5
345	18844.7	21636.8	28583	34462.5	74434.8	92806
346	18847.8	21814	28443.2	34411.6	74395.1	92871.2
347	18727.7	21710.1	28509.2	34446.9	74508.6	92745.3
348	18759.8	21647.5	28573.3	34383.4	74731.3	92780.8
349	18824.8	21683.8	28558.1	34356.3	74662.5	92974.7
350	18805	21726.7	28518.9	34581.8	74518.5	92972.4
351	18771.6	21750.9	28472.6	34550.6	74539	93129.6
352	18911.8	21730.5	28482.1	34504.6	74626.9	93111.4
353	18760.8	21693.9	28571.7	34574.7	74733.4	93306.2
354	18853.5	21736.3	28591.9	34512.6	74872.5	93259.8
355	18863.6	21774.9	28392.5	34450.1	74871.4	93390.4
356	18810.9	21741.8	28564.8	34539.1	74870.4	93380.8
357	18797.9	21708.1	28559	34486.1	75062.3	93481.2
358	18840	21647.9	28477.7	34402.1	75004.7	93412.1
359	18812.2	21664.9	28478.8	34573.6	75229.7	93401.7
360	18795.9	21792.6	28489.8	34603.6	74989.4	93568.3
361	18901.7	21671.5	28602.9	34544.6	75223.2	93630.1
362	18838.2	21850.2	28630.6	34533.1	75185.6	93656.6
363	18830.3	21682.3	28433.4	34565.2	75263.3	93826
364	18877.7	21719.7	28509.7	34648.1	75287.3	93817.4
365	18872.2	21689.7	28563.6	34742.1	75377.8	93795.7
366	18866.3	21801.2	28646.9	34703.5	75277.7	93941.8
367	18725.7	21681.9	28501.3	34646.7	75431.7	94243.8
368	18825	21819.1	28563.1	34555.9	75479.2	94173.9
369	18846.6	21819.9	28575.5	34519.5	75433.4	94100.4
370	18873.4	21771.2	28631.4	34759.6	75480.6	94103.8
371	18843.6	21767.4	28606.8	34641.4	75601.2	94230.9
372	18800.8	21769.2	28669.8	34733.6	75676	94364.6
373	18888.9	21749.8	28557.6	34712.3	75603.2	94477.2
374	18866.7	21773.9	28685.1	34704.9	75707.9	94125.9
375	18744.9	21776.5	28605.3	34687.8	75724.6	94460.3
376	18837.6	21762.2	28570	34726.9	75668.2	94498.3
377	18865	21811.6	28598.1	34740.4	75746.9	94584.3
378	18794.7	21663.6	28625.5	34703.4	76135.6	94643.2
379	18821.6	21790.1	28717.9	34732.9	76013.1	94737.7
380	18832.9	21774.6	28712.2	34806.1	75960.6	94725.2
381	18807	21808.9	28735.8	34808.4	76110.7	94767.2
382	18795	21802.3	28799.5	34862.6	76044	94819.9
383	18888.7	21697.3	28611.4	34797.5	76134.4	94899.3
384	18955.4	21800.9	28647.2	34793.5	76175.6	95074.7
385	18827.5	21774.5	28630.5	34872.5	76142.4	94834.6
386	18772.2	21813.2	28724.2	34900.5	76237.4	94953.9
387	18755.8	21875.8	28645	34816	76209.7	95126.5
388	18836.6	21651.9	28605.4	34913.1	76318	95110
389	18876.1	21804	28678.9	34886.8	76389.3	95206.8
390	18835.2	21788.6	28721.9	34830.6	76387.1	95296.6
391	18894.5	21816.9	28675.5	34873.5	76463.1	95350.1
392	18813.9	21778.9	28664	34877.9	76644.6	95336.1
393	18828.7	21752.5	28719.3	34874.8	76559.3	95115.2
394	18837.7	21724.3	28638.9	34850.9	76626.5	95259.6
395	18830.3	21724.6	28711.4	34862.5	76600.6	95611
396	18845.3	21698.3	28582.1	35047.1	76784.7	95443.2
397	18883.4	21751.6	28650.9	35094.6	76672.5	95715.2
398	18835.8	21791.4	28672.4	34944.7	76853.4	95662.9
399	18900.9	21633.7	28577.5	35061.1	76786.7	95657.5
400	18892.5	21729.3	28707.6	34995.1	76542.7	95841.3
401	18887.8	21696.5	28732.4	34943.3	76903.5	95617.3
402	18848.7	21753.4	28707.8	34992.1	76810.8	96054.3
403	18834.6	21753.8	28766.8	34952	77083	95744.4
404	18808	21761.1	28748.4	35027.4	77022.1	96001.7
405	18899.7	21818.6	28778.9	35011.7	77067	95970.7
406	18875.8	21753.8	28691.2	34955.4	77111.9	95982.5
407	18890.5	21746.6	28748.9	35065.6	77250.9	96137
408	18883.4	21791.8	28714	35142	77263.8	96150.5
409	18936	21747.7	28750.6	35079.6	77132.5	96273.1
410	18927.7	21862.4	28724.2	35130.8	77276.8	96066.3
411	18790	21841.4	28656.7	35097.4	77141.1	96249.7
412	18869.4	21821.9	28665.1	35152.1	77179.4	95993.6
413	18836.5	21709.9	28713.3	35198.7	77544.9	96418.4
414	18965.9	21801.4	28837.1	35165	77295.9	96331
415	18884.4	21710.2	28778.8	35103.7	77413.9	96425.5
416	18967.4	21646.3	28822.6	35098.6	77275.6	96473.1
417	18808.9	21738	28801.3	35089.2	77421.4	96397.7
418	18815.3	21724.1	28790.8	35116.6	77489.9	96586.9
419	18902.9	21713.9	28845.4	35257.2	77388.7	96391
420	18880.2	21755.4	28901	35114.9	77612	96591.9
421	18849.9	21796.4	28816.8	35147.1	77678.9	96725.2
422	18796.9	21741.7	28967.1	35101.1	77658.2	96741.3
423	18918.4	21799.2	28809.8	35300.8	77794.3	96827.1
424	18842.9	21746.7	28753.7	35202.3	77854.5	96680.9
425	18899.7	21781.5	28723.3	35126.6	77701.4	96717
426	18869.3	21783	28790.7	35216.2	77919.6	96918.4
427	18891.4	21671.7	28700.4	35233.6	77803.9	96722.6
428	18955.2	21808.4	28811.8	35175.2	78112.3	96884.7
429	18924.7	21746.2	28780.3	35270.9	78012.6	97151.2
430	18859.1	21799.1	28907.2	35299.2	78132.4	96821.2
431	18812.7	21773.7	28757.9	35254.3	78124.8	97323.5
432	18893.2	21815.9	28817.8	35279.2	78018.8	97090.5
433	18802.5	21882.8	28814.3	35280.9	78088.1	97254.2
434	18857.5	21732	28839.4	35437.3	78195.3	97179.5
435	18860.5	21771	28881.7	35158.2	78198	97231.3
436	18847.5	21859.8	28810.9	35404.9	78292	97296.6
437	18987.2	21842.8	28856.9	35388.8	78256.1	97261.5
438	18932.2	21728.2	28878.1	35405	78348.4	97327.9
439	18849.3	21816.8	28866.5	35381.2	78400.9	97308.8
440	18935.6	21843.4	28924.5	35384.2	78343.5	97442.4
441	18927.5	21801.8	28752.9	35427.1	78407.2	97401.6
442	18895.5	21830.7	28956.7	35443	78508.9	97505.8
443	18848.4	21827.3	28891.1	35336.3	78505.4	97691.3
444	18814.3	21836.9	28905.9	35404.6	78395.8	97708
445	18848.8	21773	28826.7	35409.6	78617	97784.6
446	18891.9	21743.7	28945.7	35487.2	78651.1	97682.5
447	18893.8	21691.3	28839.5	35478.3	78720.6	97883.7
448	18866.2	21774.2	28924.2	35496.4	78707.6	97757.9
449	18879.6	21766.8	28906	35449.7	78721.6	97697.2
450	18854.6	21803.4	28864.1	35455.3	78722.3	97828.3
451	18942.4	21703.3	28857.3	35471.7	78752.5	97897.4
452	18973.3	21797.6	28891.4	35581.9	78646.4	97909.3
453	18890.4	21849.6	28868.2	35545.4	78899.7	97987.9
454	18872.4	21836.1	28885.2	35499.4	78778.7	97976
455	18925.4	21682.6	28853.9	35528.7	78815.1	98032.7
456	18889.1	21789.5	28911.5	35532.9	78870.9	98041.6
457	18880.3	21833.1	29025.3	35470.7	78991.4	98120.5
458	18892.3	21763.4	28926.1	35492.1	78998.3	98142.9
459	18925.5	21832.1	29017.4	35626.7	79189.6	98214.4
460	18827.9	21732.2	28865.2	35459.9	78898	98449.5
461	18935.5	21829.3	28889.9	35561.9	79051	98234.5
462	18993.2	21812.9	28941.6	35655.3	79237.9	98426.9
463	18848.7	21724.9	28905	35572.7	79220.7	98248.6
464	18860.8	21859.6	28875.7	35531	79239.7	98342.3
465	18879.5	21788.6	28919.8	35592.3	79219.7	98486.8
466	18948.6	21761.4	29048.3	35591.2	79384.8	98442.1
467	18929.9	21814.2	29058.3	35576.4	79424.3	98482.5
468	18851.1	21902.2	28967.7	35588.1	79422.4	98569.4
469	18927.2	21725.7	28968.9	35779.6	79452	98580.9
470	18912.7	21789.9	29009.4	35652.8	79459.9	98720.4
471	18907.7	21758.5	28818.2	35663.9	79675	98704.5
472	18908.3	21896	28996.3	35724.5	79514.4	98691.7
473	18814.4	21818.6	29008.9	35684.7	79486	98595.1
474	18926.5	21797.2	28906.8	35808.8	79460	98683.1
475	18926.7	21707.5	28969.4	35668.4	79392.7	98861.3
476	18868.4	21813.9	28965.3	35663.4	79555	98865.3
477	18932.4	21818.2	29067.9	35681.3	79343.1	98931.1
478	18957.4	21742.8	29041.9	35724.4	79700.5	98828
479	18917.3	21790.4	29014.5	35589.1	79737.2	98937.6
480	18890.4	21776.7	29052.1	35766.2	79376.5	98952.6
481	18966.4	21903.7	28937.9	35794.8	79801.7	98769.5
482	18862.8	21848.3	29091	35731.8	79718	99051.6
483	18930.1	21739.5	29052.3	35642.7	79680.2	99164.3
484	18808.3	21774.1	29140.9	35639.9	79844.4	99202
485	18894.8	21867.1	29049.5	35771.8	79881.3	99224.5
486	18805.2	21946.3	29127.4	35833.8	79915.3	99255
487	18982.5	21866.3	29008.3	35625.3	80029.9	99426.4
488	18936.7	21866	29033.7	35757.7	80102.6	99287.4
489	18847.7	21840.7	29019.2	35779.4	80223.7	99356.1
490	18944.8	21866.3	29012.3	35864.3	80089.2	99375.4
491	18820.9	21822.8	29082.7	35859.3	80001.2	99643.5
492	18872.3	21760.9	29047.6	35869.7	80088.3	99499.5
493	18937.6	21783.7	29115.8	35906.1	80214.1	99741.7
494	18944.2	21728	29031.5	35935	80052.7	99544
495	18895.8	21772	29066.7	35830.5	80128.3	99639.1
496	18818.6	21802.8	29087.5	35822.1	80347.1	99363.1
497	18998.3	21797.8	29114.7	35930.3	80457.5	99769.6
498	18967.2	21803.6	29034.2	35866	80354.9	99421.2
499	18884.8	21779.4	29169.2	35876.1	80483.5	99531.6
500	18822.7	21831.4	29124.2	35893.6	80488.9	99590.6
501	18951	21857.5	29093.6	35946.7	80383.4	99774.5
502	19009.1	21841.8	29083.2	35972.8	80520.2	99614.8
503	18855.3	21835.3	29116.5	36018.8	80291	99603.7
504	18990.9	21726.4	29103	36059.9	80504.6	99817.9
505	18947.7	21750.3	29116.7	35927.4	80618.1	99626.7
506	18921.3	21829.1	29033.4	35991.2	80511.2	99754
507	18908.2	21852.1	29032.2	35961.8	80546.2	99826.4
508	19014.4	21748.7	29146.3	35988.8	80788.7	100010
509	18925.4	21842.6	29073.3	36006.5	80494.3	100125
510	18950.7	21808	29160.9	36056.5	80706.7	99970
511	18935.9	21877.7	29021.6	36145.8	80628.1	100037
512	18945.9	21870.6	29034	35930.5	80741.4	100052
513	18944.7	21774.9	29179.3	35992.2	80904.8	100041
514	18888.9	21794.9	29168.1	35981	80555	100182
515	18903.6	21878.3	29178.1	35966.8	80827.5	100010
516	18912.3	21918.5	29172.3	36069.7	80850.3	100070
517	19015.2	21857.5	29175.1	36103.9	80907	100245
518	18944.3	21805	29063.4	36053.4	80861.8	100180
519	18923.1	21762.4	29132.9	36220	80929.7	100448
520	18903.6	21907.1	29233.9	36088.8	80929.5	100334
521	19008.3	21901.3	29144.4	35997.9	81152.5	100378
522	18889.2	21827.6	29209.4	36145.2	81201.7	100215
523	18978.1	21788.5	29237.1	36187.3	81054.6	100382
524	18896.7	21825.4	29242.3	36218.6	81132.1	100318
525	18898.4	21823.7	29167.2	36191.1	81190.4	100757
526	18883.5	21883.7	29205.2	36185.9	81173.5	100339
527	19049.1	21747.4	29100	36160.7	81258.4	100619
528	18862.8	21907.5	29333.6	36033.6	81169.5	100497
529	18959.9	21864.8	29074.4	36205.6	81237.9	100535
530	18857.8	21766.5	29347.3	36125.8	81180.6	100738
531	18984.5	21801.9	29268.9	36114	81198.3	100496
532	18918.5	21804.5	29191.1	36224.1	81255.1	100724
533	18921.6	21788	29231.7	36207.9	81326.2	100612
534	18995.5	21835.8	29172.5	36264.4	81274.9	100931
535	18865.1	21766.3	29201.7	36086.4	81296.9	100841
536	19019.3	21854.7	29251.8	36161.8	81532.1	100975
537	18929.6	21878.8	29293.3	36152.6	81384.5	100736
538	18994.8	21888.1	29173.6	36233.5	81573.6	100931
539	18941.9	21832.4	29196.9	36156.4	81510.7	101066
540	18875.3	21767.8	29226.3	36118.4	81443.2	100667
541	19001.6	21970.8	29272.9	36263.7	81585.9	101161
542	18970.3	21772.5	29209.6	36297.1	81646.6	100858
543	18986.1	21964.3	29274	36333.2	81793	101007
544	18979.9	21795.4	29296.5	36205.1	81705.4	101035
545	18995.9	21831.6	29349.8	36236.3	81628.1	101030
546	18998.4	21834.7	29261.1	36258.2	81670.2	101203
547	18934	21860.1	29288.1	36296.9	81677.9	101076
548	19011.1	21851	29423.4	36277.7	81805.8	101254
549	18979.7	21797.7	29200.1	36325.5	81817	101304
550	18944.5	21851.4	29274.8	36374.2	81994.8	101319
551	18916.2	21800.2	29281.6	36374.9	81819.4	101450
552	19018.1	21766.7	29372.7	36311.2	81873.3	101282
553	18982.2	21841.4	29352.9	36429.5	81981	101375
554	18860.4	21846.8	29283.2	36419.9	81805.8	101387
555	19002.8	21803.8	29335.2	36462.6	81963.3	101461
556	18979.2	21838.4	29433.4	36383.8	81887.8	101389
557	18972.8	21849.7	29348.5	36390.9	82058.6	101394
558	18903.7	21896.2	29315.5	36472.7	82097.2	101525
559	18928.9	21784.7	29286.9	36431.9	81953.1	101428
560	19008.9	21858.8	29283.4	36393	82238.5	101552
561	18904.4	21840.5	29298.4	36408.5	82033.8	101347
562	18966.4	21962.4	29260.6	36361.3	82084	101502
563	18876.2	21814.9	29305.2	36521.9	82050.2	101687
564	18907.6	21765.7	29300.2	36495.6	82226.8	101703
565	18978.2	21825	29342.7	36595.6	82335.2	101604
566	18925.4	21841.7	29383.7	36443.6	82165.8	101693
567	18972.2	21920.9	29439.3	36449.9	82358.3	101815
568	18945.8	21897.9	29460.5	36518.8	82459.9	101616
569	18942.7	21850.4	29431.4	36523	82445.1	101969
570	19012.7	21877.1	29304.8	36454.7	82524.4	101796
571	18913.1	21879.9	29356.6	36417.7	82383	101694
572	18947.5	21943.2	29399.2	36475	82493	101741
573	18980.8	21831.8	29464.2	36456.8	82370.8	101928
574	18959.1	21817.7	29334.9	36509.1	82268.5	101969
575	18924.7	21808.8	29347.5	36571.6	82478.6	101964
576	18878.9	21882.4	29363	36536.9	82683.2	102020
577	18883.5	21802.4	29499.1	36543.3	82617.2	102206
578	18911.5	21940.6	29370.9	36591	82565.2	102038
579	18852.1	21824.5	29379.1	36560	82642.5	102067
580	19005.1	21835.7	29399.7	36703.7	82710.1	102142
581	18928.2	21827.4	29363.1	36551.4	82778.1	102148
582	18898.7	21849.2	29364.1	36632	82862.6	102157
583	18987.2	21807.6	29457.3	36545.2	82928.1	102004
584	19008.3	21854.7	29488.9	36627.4	82837.8	102146
585	18945.5	21970.3	29447.1	36636.7	82655.6	102320
586	19070.3	21805.5	29455	36771	82620.7	102166
587	18989.1	21856.6	29376.7	36614.2	82847.6	102280
588	18941.5	21837.8	29450.6	36714.3	82777	102207
589	18936.3	21873.4	29414.8	36803.5	83079.5	102128
590	18988.5	21843.9	29587.6	36648.3	82805	102324
591	18980.7	21838.9	29441.1	36662.2	82784.8	102387
592	18942	21880.6	29464.6	36819.3	82993.4	102310
593	18977.4	21973.7	29528.3	36713.9	82914.1	102435
594	18996.1	21814.8	29517.6	36659.3	83159.8	102524
595	18931.9	21825.1	29546.4	36730.4	82997.8	102419
596	19060.8	21848.1	29632.7	36718.1	83052.6	102395
597	18952.7	21878.3	29492.4	36741.6	83236.6	102641
598	18975.2	21840.3	29485.9	36766	83092.8	102373
599	18980.7	21897.9	29399.2	36838.8	83048.9	102645
600	19010.2	21863.9	29446.6	36754.5	82985.3	102604

## Sheet: Sheet2
Time(s)	0uM:80uM::DMPG:DMPC	1uM:80uM::DMPG:DMPC	5uM:80uM::DMPG:DMPC	10uM:80uM::DMPG:DMPC	20uM:80uM::DMPG:DMPC	30uM:80uM::DMPG:DMPC
0	18251.8	20213.2	23987.3	25514.1	47456.6	49336.7
1	18262	20190.3	24147.4	25559.5	47744.7	49587.9
2	18253.7	20184.1	24196.8	25693.8	47909.9	49908.1								DMPG (%)	Rate
3	18248.3	20213	24241.3	25767.3	48197.5	50300.8								0	1.8315
4	18327	20167	24299.7	25846.2	48320.6	50448.9								1.23457	6.3011
5	18273	20297.6	24301.5	25921.7	48677.6	50745.6								5.88235	16.275
6	18306	20295	24452.7	25941.5	48913.6	51096.4								11.1111	31.869
7	18284.1	20174.1	24416.2	26019.1	49106.4	51205.8								20	85.34
8	18271.9	20263.5	24505.1	26049.4	49426.2	51580.2								27.2727	151.88
9	18295	20325.9	24587.8	26190.7	49508.2	51909.5
10	18279.5	20278.3	24589.1	26405.8	49701	51957.8
11	18396.2	20281.8	24717.8	26414.5	49966	52089.2
12	18305.3	20377.1	24781	26493.5	50148.9	52439.7
13	18176.6	20338.7	24746.4	26496.4	50229.4	52710.7
14	18301.4	20323.4	24738.9	26625.2	50434.4	52983.8
15	18347.5	20396.5	24868.9	26671.6	50665.8	53246.3
16	18243.1	20376.1	24978.4	26677.9	50841.1	53936.1
17	18303.6	20471	24979.4	26763.7	50991.5	53999.2
18	18349.1	20447.6	25035	26871.9	51131.2	54087.5
19	18338.4	20526.9	25097.3	26967.3	51219.1	54415.9
20	18309.9	20554	25133	26930.3	51436.6	54786.7
21	18322.8	20455.6	25104.4	27024.4	51624.4	54753.9
22	18404.9	20545.3	25317.5	27053.1	51463.1	55038.9
23	18314.2	20447	25283.6	27145.1	51800	55114.4
24	18306	20504.9	25255	27135.3	51886.8	55447
25	18299.3	20562.9	25312.6	27189.1	52052.3	55695.8
26	18329.1	20583.5	25279.2	27336.7	52292.4	55737.1
27	18279	20535.9	25419.3	27292.2	52329.7	55872.1
28	18243.8	20594.4	25452.2	27418	52523.1	56115.4
29	18385.7	20521	25619.5	27420	52543.6	56512.7
30	18299.2	20563.5	25498.8	27483.9	52814.4	56595.2
31	18341.7	20576	25546.9	27482	52903.8	56756
32	18404.5	20588.1	25564.7	27628.6	53047.3	56886.5
33	18281	20680.9	25594	27677.7	53112.1	57072.3
34	18287.8	20641.2	25655.2	27736.1	53237.5	57435.2
35	18285.1	20628	25717.2	27820.3	53406.9	57478.6
36	18281.9	20733.1	25740.7	27781.8	53553.9	57852.6
37	18331	20711	25740.5	27856.8	53537.2	57854.9
38	18350.6	20771	25718.4	28005.5	53629.5	58024
39	18319.8	20714.3	25721.2	27966.6	53876	58295.3
40	18336	20724.9	25859.3	28005.1	53830	58318
41	18377.8	20710.7	25852.4	27901.7	54045.4	58632
42	18351.3	20731.3	25891.9	28175.2	54052.8	58778.5
43	18331.9	20675	25953.1	28279.3	54312.4	58802.3
44	18364.5	20798.7	26008.4	28233.1	54325.4	58954
45	18341.3	20768.5	25915.5	28273.3	54353.5	59342.7
46	18251.4	20798.1	25908.7	28220.8	54564.1	59410.3
47	18419.7	20746.9	26044.6	28380.6	54691.8	59512.1
48	18369.1	20815.6	26115.2	28360.6	54761.5	59624.6
49	18363.4	20854.8	25939.6	28377.8	54869.6	60107.6
50	18356.6	20770.9	26010	28359.2	54954.8	60034.7
51	18356.4	20752.5	26145.7	28628.2	54955.8	60200.1
52	18328.2	20792	26045.9	28517.7	55137.7	60422.9
53	18378.8	20758.1	26042.9	28588.4	55313.2	60545.4
54	18428	20833.5	26164.4	28457.6	55298.9	60740.1
55	18385.6	20877.7	26095.6	28621	55435.3	61092.6
56	18337.5	20866.8	26175.7	28681.5	55640.1	61012.6
57	18422.3	20839.5	26201.5	28786.9	55670.1	61228.3
58	18396.8	20866.5	26264.3	28793	55938.9	61437.6
59	18321.3	20932.9	26334.1	28746.5	55964.5	61633.5
60	18411.8	20933	26364.9	28878.7	55874.4	61783.6
61	18386.9	20820.8	26331.6	28800.3	56121.6	62020.5
62	18421.7	20918.9	26215.1	28875.4	56008.6	62074.4
63	18336.5	20917.4	26403.6	28953.4	56196.8	62252.8
64	18451.3	20884.8	26253.5	28970.5	56162.6	62391.5
65	18388	20967.4	26460.4	29109.1	56376.9	62637
66	18439.4	21000.4	26490.3	29097.6	56493.8	62888
67	18458.2	20875.2	26513.1	29074.4	56491.5	62913.9
68	18402.1	21023.5	26411.1	29160.2	56520.7	62947.1
69	18377.6	20991.8	26517.4	29151.9	56601.3	63076.6
70	18364.3	20984.5	26521.5	29200.4	56718.1	63500.8
71	18447.1	20916.5	26513.2	29174.2	56725.1	63585.5
72	18407.9	20962.2	26545.8	29155.7	57101.4	63616
73	18395.5	20988.7	26569.5	29295	57009	63715.6
74	18463.2	21005.9	26616.6	29283.1	57216.6	64105.4
75	18432.6	20907.3	26528.3	29336.2	57266.6	64233.9
76	18442.4	20974.3	26554.2	29222.4	57216.3	64384.7
77	18469.9	21011.4	26601.7	29437	57318.4	64517.9
78	18510.2	20900	26619.1	29532.9	57425.6	64630.8
79	18471.2	21037.4	26665.8	29530.4	57786.4	64877.6
80	18370.5	20998.7	26720.4	29608.6	57746.5	64868.9
81	18474.7	21035.5	26592.9	29505.8	57723	65001.3
82	18527.2	21048.6	26769.5	29485.3	57828.3	65184.1
83	18431.2	21131.9	26681.4	29612.9	57850.3	65534.1
84	18427	21118.9	26734.5	29703.4	58014.8	65341.9
85	18482.7	21138	26697.9	29785.5	58063.9	65662.4
86	18352.2	21087.7	26654	29704.2	57993.1	65912.9
87	18494.3	21037	26753.7	29741.9	58133.3	65983.2
88	18539.8	21055	26793.7	29860.1	58309.2	66096.1
89	18455.5	21020.4	26797	29828.1	58474.5	66222.1
90	18472.9	21099.6	26849.1	29906.7	58627.5	66624.5
91	18421.7	21140.6	26826.9	29878.9	58415.3	66738.7
92	18461.7	21111.4	26837.1	29887.9	58662.8	66875.8
93	18389.1	21127.3	26861.2	29994.3	58619.9	67054.5
94	18493.7	21180.6	26948.5	29968.1	58714.1	67238
95	18350.6	21117.9	26884.3	30175.6	59008.3	67004.4
96	18471.2	21239	26915.5	30006.2	58788.9	67532.4
97	18514.5	21089.2	26942.7	29997.3	58985.6	67602
98	18451.4	21130.9	26907.9	30035.8	58923.4	67697.7
99	18504.8	21194.2	26966.2	30029.2	59223.5	67910.2
100	18478.3	21074	27015.2	30120.1	59179.7	68007.5
101	18484.3	21181.9	27014	30223.5	59240.4	68115.8
102	18452.9	21154.9	26980	30185.1	59492.4	68300.7
103	18463.1	21218.4	27006.4	30191.2	59503.6	68303.1
104	18428.5	21113.6	27045	30334.7	59556.5	68505.5
105	18414.8	21105.3	27010.3	30124.6	59558.2	68531.7
106	18439.2	21167.4	27031	30269.2	59795	68857.2
107	18394.9	21228.6	27063.9	30330.7	59924.3	69059.1
108	18532.9	21204.5	26993.6	30290.9	59822.5	69010.9
109	18403.4	21172	27069.8	30320	59886.8	69165
110	18463.4	21178.4	27174.5	30423.6	60053.3	69343.5
111	18514.3	21249.3	27074.2	30411.8	60020.3	69631.5
112	18508.8	21237.2	27139.6	30444.8	60264.9	69660.9
113	18461.6	21275.7	27118.5	30585.1	60202.9	69887.1
114	18456.8	21184.8	27135.6	30595.2	60304.7	69887
115	18539.5	21231.6	27181.1	30649	60393.2	70219.9
116	18539.2	21234.6	27211.7	30658	60575.2	70282.2
117	18442.1	21278.9	27217.7	30644.5	60510.6	70447.9
118	18513.5	21244	27195	30717	60592.5	70669.8
119	18434.9	21167.1	27181.3	30666.4	60538.1	70797.1
120	18443.3	21237	27146.1	30706.4	60756.2	70910.8
121	18544.9	21174.7	27184.7	30688.4	60750.9	70945
122	18517.5	21206.5	27256.8	30820.9	60892.7	71296.8
123	18496.3	21323.4	27278.5	30865.9	61022.6	71435.3
124	18544.8	21298.9	27241.8	30784	61052.9	71498
125	18526.8	21312.5	27211.2	30790.9	61163.6	71427.8
126	18482.9	21329.8	27319.9	30765.6	61336.8	71947.3
127	18551.5	21298.7	27342.8	30922.7	61180.9	71724.9
128	18486.7	21230.1	27315.3	30960.4	61333.4	71967
129	18486.4	21219.7	27271.8	30858.2	61356.5	72270
130	18533.9	21302.6	27388.1	30880.1	61520.6	72131.3
131	18496.2	21332.6	27221.6	30813.1	61585.3	72456.7
132	18576.5	21233.8	27334.7	30929.3	61589.6	72520.4
133	18552.4	21267	27353.7	31035.9	61707	72714.4
134	18537.8	21403.3	27283.2	31083.4	61861.4	72736.4
135	18495	21359.2	27382.4	31148.3	61845.3	72963.1
136	18567.9	21230.9	27470.8	31231.7	61980.7	73098.9
137	18560.1	21422.7	27335.3	31196.1	61979.6	73260.8
138	18491.4	21332.7	27347.2	31178.1	62032.2	73237.9
139	18452.7	21470.3	27384.7	31163.6	62102.2	73491.4
140	18429.2	21355.9	27405.8	31241.1	62141.2	73656
141	18627.2	21366	27449.3	31199.8	62364.3	73742.7
142	18603.8	21390.6	27427.4	31258.1	62284.7	73818.5
143	18571.7	21269.2	27446.8	31268	62417.5	73960.9
144	18488.5	21404	27462	31337	62462.1	74154.9
145	18512.1	21296.8	27398.5	31375.2	62593.3	74379.7
146	18667.8	21250.5	27488.5	31292.8	62671.5	74411.4
147	18538.7	21363.6	27362.1	31276.5	62681.5	74479.7
148	18520.9	21290.6	27416.9	31257	62700.2	74795.4
149	18565.1	21329.8	27403.5	31412.5	62862.1	74850
150	18552.4	21399.9	27490.9	31416.9	62887.7	75066.6
151	18569.6	21437	27526.1	31552.5	62936.6	75088.1
152	18571	21374.7	27452.5	31472.6	63072.2	75161.1
153	18594.3	21407	27451.2	31387	63129.2	75252.9
154	18540.2	21431.3	27534.1	31591.8	63214.5	75488.3
155	18508	21398.7	27490.3	31493.8	63028.7	75638.8
156	18562.5	21365.5	27516	31671.8	63388.5	75865.4
157	18612.2	21432.4	27570.2	31587.7	63229.1	75856.4
158	18551	21399	27574.3	31609.8	63511	75929.8
159	18587.7	21455.7	27492.2	31733.4	63335.1	76281.3
160	18549.5	21319.7	27624.5	31666.8	63590	76232.9
161	18674.9	21458.6	27561.2	31616.6	63755.8	76149.2
162	18461.7	21473.5	27652.5	31770.3	63699.7	76635.8
163	18581.9	21450.8	27653	31772.3	63877.5	76541
164	18563.9	21392.8	27616.3	31734	63901.1	76675.5
165	18631.5	21399.9	27667.7	31709.3	64054.8	76789.9
166	18572.9	21385.5	27692.7	31827.2	64086.3	76827.3
167	18595.1	21420.8	27687.7	31749.1	64084.7	77205.4
168	18580.2	21387.6	27636.8	31826.3	64140.8	77163.7
169	18512.9	21388.8	27636.4	31844.2	64448	77346.7
170	18562	21471.6	27653.7	31918.8	64379.4	77655.3
171	18575.1	21488.5	27662.5	31874.4	64446.6	77634.9
172	18595.8	21433.3	27762.2	31854	64481.2	77696.9
173	18585.1	21349.4	27652	31844.6	64499.7	77871.9
174	18620.4	21514	27654.2	31925.8	64419.4	77887.6
175	18685	21410.8	27590.6	31853.1	64678.9	78191.4
176	18661.9	21418.4	27667.1	31878.1	64654.5	78325.2
177	18580.7	21517.1	27618.4	31964.8	64863.4	78474
178	18595	21494.6	27766.4	32075.1	64981	78315.8
179	18616.9	21428	27798.6	32049	64786.7	78651.3
180	18677	21447	27641.6	32001.5	65035	78897.3
181	18518.1	21459.6	27732.3	32087.7	65049.1	78891.2
182	18593.3	21533.1	27825.6	32208.9	65168	78920.2
183	18548.1	21483.4	27661.9	32116.1	65122	78850.7
184	18529.5	21583.7	27833.5	32158	65153	79259
185	18688.9	21514.4	27809.3	32187.8	65299.6	79385.9
186	18538.9	21496.8	27623.3	32246.8	65508.7	79323.6
187	18643	21504.9	27746.1	32130.6	65561.3	79535.8
188	18647.4	21495.5	27770.2	32227.9	65508.6	79486.8
189	18569.3	21558.8	27894.1	32251.6	65600.5	79707
190	18624.2	21527.8	27842.8	32198.3	65718.7	79839.8
191	18655.3	21531.3	27741.7	32242.5	65607	79988.4
192	18585.5	21542.9	27761.6	32256.8	65790.1	79960.4
193	18630.8	21436.3	27815.8	32334	65926.4	80153.8
194	18634.1	21581.4	27788.9	32288.7	65884.7	80341.2
195	18615.9	21496.2	27831.1	32311.1	66019.4	80299.2
196	18613.4	21620.5	27834	32354	66256.4	80558.3
197	18611.2	21548.7	27825.4	32359.8	66072.7	80583.6
198	18583	21603.5	27899.4	32331.2	66115.4	80713.8
199	18628.7	21601.7	27757.8	32311	66164.5	80979.8
200	18675.5	21500.8	27828.8	32380.9	66264.8	80875.5
