# Supplementary material for: Daptomycin forms a stable complex with phosphatidylglycerol for selective uptake to bacterial membrane
Source: eLife. 2025 Jun 2;13:RP93267. doi: 10.7554/eLife.93267 (PMC12129450; doi:10.7554/eLife.93267)
Supplement: Figure 2—figure supplement 3—source data 3. [file elife-93267-fig2-figsupp3-data3.xlsx]

## Sheet: Multi Scans EM
Multi Scans EM
Labels	CONTROL 9 EM	8 EM	7 EM	6 EM	5 EM	4 EM	3 EM	2 EM	1 EM
Type	Emission Scan	Emission Scan	Emission Scan	Emission Scan	Emission Scan	Emission Scan	Emission Scan	Emission Scan	Emission Scan
Comment
Start	385	385	385	385	385	385	385	385	385
Stop	700	700	700	700	700	700	700	700	700
Step	1	1	1	1	1	1	1	1	1
Fixed/Offset	365	365	365	365	365	365	365	365	365
Xaxis	Wavelength	Wavelength	Wavelength	Wavelength	Wavelength	Wavelength	Wavelength	Wavelength	Wavelength
Yaxis	Counts	Counts	Counts	Counts	Counts	Counts	Counts	Counts	Counts
Scan Corr. by File	TRUE	TRUE	TRUE	TRUE	TRUE	TRUE	TRUE	TRUE	TRUE
Corr. by Ref. Det.	TRUE	TRUE	TRUE	TRUE	TRUE	TRUE	TRUE	TRUE	TRUE
Fixed/Offset Corr. by File	FALSE	FALSE	FALSE	FALSE	FALSE	FALSE	FALSE	FALSE	FALSE
Repeats	1	1	1	1	1	1	1	1	1
Dwell Time	0.1	0.1	0.1	0.1	0.1	0.1	0.1	0.1	0.1
Lamp	Xenon	Xenon	Xenon	Xenon	Xenon	Xenon	Xenon	Xenon	Xenon
Temp	0	0	0	0	0	0	0	0	0
Scan Polariser	None	None	None	None	None	None	None	None	None
Scan Slit	3.00015	3.00015	3.00015	3.00015	3.00015	3.00015	3.00015	3.00015	3.00015
Fixed/Offset Polariser	None	None	None	None	None	None	None	None	None
Fixed/Offset Slit	3.00015	3.00015	3.00015	3.00015	3.00015	3.00015	3.00015	3.00015	3.00015
Detector	pmt900	pmt900	pmt900	pmt900	pmt900	pmt900	pmt900	pmt900	pmt900
385	5169.14	5218.68	4864.55	4904.63	4651.81	5253.72	6127.42	6763.05	8168.42
386	4914.29	4842.94	4564.34	4735.11	4417.3	5044.55	5947.88	6574.04	7861.49
387	4607.61	4392.26	4027.77	4293.19	4174.85	4827.85	5749.14	6150.75	7637.59
388	4299.37	4281.69	4037.4	4075.11	3997.65	4727.41	5522.78	6301.21	7603.58
389	3922.26	4012.02	3820.41	3916.38	4088.66	4656.86	5582.53	6437.55	7509.95
390	3754.09	3737.6	3569.93	3725.49	3775.69	4746.73	5940.58	6798.26	7920.04
391	3542.86	3530.86	3373.13	3400.65	3662.05	4745.94	6221.74	7052.92	8111.51
392	3368.88	3301.53	3205.05	3454.6	3762.66	4987	6625.57	7855.11	8427.52
393	3209.57	3241.9	3168.38	3263.11	3695.71	5280.69	7051.86	8330.27	9320.64
394	3006.47	2994.68	2963.43	3289.94	3775.58	5767.14	7828.91	9363.54	10311.4
395	2950.17	3071.15	3005.7	3398.62	4110.82	6213.23	8778.09	10487.7	11326.1
396	2903.61	3097.38	3005.07	3533.36	4388	6983.13	10090.1	11827.9	12656.8
397	2905.6	3001.12	2988.74	3544.98	4526.63	7867.72	11434.4	13785.5	14552.8
398	2754.44	2836.85	3081.63	3634.63	5135.58	8474.32	13157.4	15940.9	16665.3
399	2751.26	2878.86	3071.53	3728.74	5360.84	9543.41	15173.7	18073.4	18750.5
400	2515.06	2844.44	3071.59	4049.53	5964.42	10926.5	17203.6	20636.8	21732.2
401	2554.96	2786.23	3364.97	4318.27	6545.45	12459.4	19734.3	24183.2	24961.4
402	2499.91	2920.76	3434.09	4592.13	7167.79	14072.4	22678.2	27627.3	28841.7
403	2492.7	3017.44	3476.39	5149.01	7766.14	15977	26419.2	31638	33042.5
404	2573.25	3027.57	3774.86	5356.44	9055.12	18162.8	30077.9	36386.3	37492.6
405	2606.91	3125.22	4012.42	5914.75	10179.7	20334.6	34271.7	41312.4	43015
406	2721.7	3289.97	4318.47	6554.03	11245.3	23826.2	38760.4	46662.4	48956.8
407	2783.44	3467.86	4610.57	7113.66	12568.8	26815.7	43973.7	53801	55130.9
408	3029.17	3793.85	5213.55	7904.07	14067.4	30277.7	49614.2	60143.9	62181.2
409	3199.18	4054.31	5720.74	8655.01	15490.4	33559.8	55450.8	67402.1	69245.1
410	3118.6	4000.73	6022.81	9364.53	17149.5	37450.6	63263.7	76830.7	78543.3
411	3339.88	4472.54	6672.9	10369.2	19082.9	41822.8	69650.3	84610.1	87023.8
412	4015.04	5132.05	7536.95	11608.4	21166.7	45853.8	77038.9	93199.3	96204.3
413	4475.1	5656.22	8416.69	12848	23567.5	50572	84508.4	102938	105538
414	5073.82	6391.56	9333.34	14147.4	25925.1	55554.3	93006.2	112133	116548
415	5627.15	7109.6	10292.8	15469.7	28240.8	60396.7	100686	122619	127605
416	6259.93	7645.63	11244	16866.4	31151.2	65804	108827	132613	137504
417	6770.25	8585.52	11925.3	17957	32842.6	70291.7	116842	141827	147309
418	7097.43	8815.5	12663.7	18988.9	34951.1	75742.6	125483	151785	158778
419	7259.62	9028.7	13241.1	20030.7	36902	80320.8	133360	161697	168981
420	7309.23	9326.34	13944.8	21025.6	39102.4	85226.6	142045	172756	179178
421	7414.67	9304.87	14000.2	22211.6	41426.6	90151.2	148482	181328	189180
422	7490.01	9511.61	14684.6	22832.5	42574	93897.7	157215	191406	200096
423	7636.68	9743.83	14888.4	23874.9	44692.6	98091.7	164591	199656	209518
424	7749.07	10442.5	15743.5	24463.6	47416.6	103208	173040	209332	219619
425	8249.47	10566.5	16009.5	25782.2	49162.6	107351	178505	219090	230274
426	8771.53	11129.5	16807.8	27176.1	51260.4	112343	186966	228532	239337
427	9252.97	11746.3	17649.5	28110.9	52976.7	115641	193875	237017	249763
428	9724.78	12289.7	18318.6	29175.3	55702.9	120996	201460	245309	259454
429	10124.2	13011.5	19432.9	30469.8	56845.9	124928	207354	253827	267717
430	10745.7	13670.5	20207	31687.6	59422.1	129051	215746	261004	276885
431	11315.2	14239.4	21081.4	33178	61078.3	133456	221792	269872	284999
432	12131	14696.5	22189.4	33642.9	63065.2	137572	228218	276882	294081
433	12809.5	15402.6	22733.6	34873.2	64467.9	140330	232885	283858	300427
434	13071.1	16138.7	23660.7	35742	66387.4	143916	239059	289461	309397
435	13721.8	16712.8	24169.3	36709.9	68238.6	146979	242725	294452	313689
436	14093.3	16918.4	25055.6	38003.6	68881.1	149048	247879	300269	319953
437	15085.7	17757.9	25790.9	38743.5	70538.9	152330	252581	307279	325745
438	15650.6	18097.7	26324.1	39424.4	72292	154765	255509	309780	330880
439	15955.8	18691.7	27090.9	40222.9	72751	157068	259152	314042	337274
440	16691.3	19582.8	27612.6	41136.7	74309	160253	262591	319529	339175
441	17363.6	20047.9	28371.2	41683.3	74860.5	161284	266214	322810	344132
442	17898.5	20829	29099.1	42267.9	75881.1	163937	268900	325312	347620
443	18239.4	21160.9	29457.6	43088.7	77116.9	163921	270539	328432	350775
444	18604.9	21235.8	30383.1	44122.5	77527	166504	272935	330730	354538
445	19430.1	22154.8	30916.3	44304.1	78364	167294	274110	332964	356198
446	20084.5	22704.3	31838.6	45168.3	79762.6	169732	276897	334348	360553
447	21131.6	23444.3	32501.6	45814.3	80481.6	170253	277798	337245	362018
448	21481.9	24082.7	33245	46592.8	80876	170563	278693	338608	363372
449	21873.5	24314.6	33724	46375.6	81207.4	170887	278672	339533	365507
450	22056.9	24194.8	33223.1	46958	80973.9	171629	280142	338267	365019
451	21999.9	24555.6	33076.3	46737	81106.8	171187	279838	338899	365386
452	22326.9	24841.3	33680.2	46490.7	81341.6	171598	279681	339598	365500
453	22717.5	24623.4	34072.4	46686.4	80676.7	171682	280232	339761	366907
454	22567	25172	33859.1	46325	81431.9	171147	278477	338563	365077
455	23369.2	25509.8	34300.4	47433.1	81401.5	170559	279012	338665	364275
456	23562.9	25732	34274.2	47282.9	80822.2	169743	277388	337242	363559
457	23929.3	25948.7	35011.8	46973	80751.1	169244	275815	334419	362555
458	24313	26204.3	34708.8	47570.9	80351.2	168396	275009	332133	361373
459	24056	26070.7	35153.5	47803.1	80601.4	167666	273090	331604	358349
460	24692.2	26593.2	35186.9	47544.8	80195.5	166825	272193	329827	357270
461	24550.4	26949.2	34957.4	47621.1	80020.5	166876	270665	327681	355749
462	25099.2	27152.1	35720.4	47332.6	80111.5	165341	268588	326290	353535
463	25589.1	26971.4	35544.8	47649.7	78557	164187	266287	323049	351956
464	25555.2	27008.5	35535.8	47173.1	77963.9	162938	263882	320753	347566
465	25699.7	27224.8	35747.3	47016.4	77881.1	161640	261760	317451	345773
466	25734.4	26969.3	35684	47356.6	76786.4	159371	259778	314554	342481
467	25914	27642.7	35449	47239.6	76673.4	157505	256409	311964	340234
468	25672.5	27739.6	35537.5	46710.7	76065.6	156905	254967	308542	336531
469	26226.1	27359.5	35442.8	46219.9	74810.3	154574	251405	304141	333424
470	25956.2	27209.2	35409.6	45950.2	74044.4	153117	248543	301165	328623
471	25924.1	27525.6	35178.9	45552.5	73592.8	151481	246728	298226	325666
472	26089.8	27150.3	35288.9	44946.5	73045.9	150726	242399	294822	321241
473	26339.6	26921	34962.9	44655.1	71784.1	147147	239737	290684	317784
474	26290.2	26856.1	34541.6	44472.2	71011.2	146505	234869	285831	313995
475	25942.5	26920.2	34406.1	43992.1	70600.2	143420	233399	282812	309408
476	25704.9	26882.3	34450.8	43803.1	68863.7	141805	229801	278603	306160
477	26124	26997.9	34212.6	43225.5	68806.3	139740	226763	274332	303240
478	25928.7	26634	33939.3	42858.8	67392.2	138699	223030	271322	297808
479	25918.3	26661.9	33627.5	42336.2	66804.1	135900	220693	267932	294813
480	25856.9	26726.5	33769	41696	66453	133639	216680	263741	290538
481	25559.4	26557.5	33497.6	41368.1	65403.3	131984	213634	260739	286194
482	25395.1	26063.2	33296.5	41237.2	64184.7	129917	209577	254542	280798
483	25252.7	26309.2	32743.2	40378.3	62971.4	128327	206770	249614	276492
484	25172.1	25356.6	32781.1	40312.3	62100.3	125594	202444	245786	272612
485	25130.5	25339.8	32122.6	39892.5	60969.4	124091	199846	242587	267572
486	24887.4	25717	31783.6	38887.3	60445.7	121423	195287	238269	263937
487	24870	25511.4	31218.3	38574.9	58668.7	119602	191504	234171	259088
488	24470.2	24780.7	31112.8	38278.3	58266.8	117807	188511	229502	253081
489	24339.8	24525.9	30687.3	37650.3	57225.6	115396	185312	225273	248889
490	24061.4	24563.8	30550.8	36712.4	56106.8	112956	182030	221065	245996
491	23905.8	24606.2	30436.1	36144.9	55336.1	110718	177841	216728	240775
492	23999.6	24200.1	29646.4	36492.4	54371.2	108733	174859	213444	237099
493	23478.8	23902.3	29480.4	35859.9	53114.5	107513	171271	209179	231706
494	23252	23676.8	29041.4	35005	53136.5	104418	168503	205232	227099
495	23075.7	23407	28840.5	34690.6	51500.9	102698	165148	201176	223737
496	23054.3	22929.5	28626.5	33734.5	50983.9	101135	161842	197030	218377
497	22392.8	22766.7	28120.7	33297.5	49745.7	99072.7	158827	193187	215279
498	22343.2	22487.2	27650	33174.9	49006.6	97060	156371	189036	211610
499	22073.3	22154.9	27382.3	32643.4	48102.5	94781	152881	185466	205851
500	21941.2	21933.2	27179.1	31928.1	46809.6	92744.6	148704	182129	201509
501	21704.4	21618.9	26909.2	31306	46202.5	90492.5	145205	176969	198056
502	21197.7	21291.7	26294.2	31058.1	45666	88683.8	143494	173962	192939
503	21022.4	21362.5	26054.8	30406.4	44296.8	87317.1	139356	169395	190465
504	20857.3	20710.3	25372	29697.1	43811.8	85805.1	136371	167661	185432
505	20759.9	20836.9	25051.9	29278.7	43097.5	83619.1	134271	162503	182627
506	20511.2	20036.3	25075.1	28795.8	41921.1	81991.2	130206	159627	177617
507	20040.3	19981.5	24490.4	28170.7	41678.9	80225.4	127166	155079	174007
508	19364.9	19652.7	24359.2	27583.3	40396.7	78195.9	124445	151599	169344
509	19278.1	19127.3	23795.6	27485.5	39269.8	76383.6	121353	148002	166266
510	19301.3	19109.1	23120.3	26706.7	38961.5	74508	119589	144623	161695
511	18860.1	19126.6	22494.8	26526	37653.2	73395.3	116305	141294	158983
512	18726.6	18924.2	22706.1	25691.4	36904.5	71344.6	113742	139052	154956
513	18375.8	18280.6	22607.8	25457.3	36500.6	70342.3	111976	135894	152211
514	17860.8	18338.5	22201.7	25050.9	35661.7	68721.8	109320	132180	149120
515	17887.3	17569.3	21339.9	24293	34736.5	66915.1	105854	128643	145563
516	17417.2	17605.1	20983.7	24369.5	34160	65580.7	103701	126798	141249
517	17403.7	17503.8	20770	23395.3	33600.9	64566.8	101533	123119	138500
518	17305.1	16743.3	20327.3	23018.8	32695.2	62905.9	98889.1	120460	135448
519	16875.1	16782.8	20141.4	22629.6	31803.5	61389.6	96778.2	117772	132487
520	16554.1	16617.6	19733.6	22315	31379.6	59758.6	95115.6	114896	129550
521	16305.4	16004.6	19466.4	21631.5	30475.9	58803	91279.2	112147	125684
522	15845.6	15799.1	19181.5	21110.8	30000	56667.8	89303.1	109249	122894
523	15842.4	15709.1	18410	20890.8	29413.9	55583.8	86703.9	107163	119006
524	15789.1	15271.3	18546.8	20398.7	28505.2	54227.3	85144.4	103376	116687
525	15231.4	15042.6	17834.4	20090.4	27842.6	52999.6	82831.1	100952	114093
526	14743.8	14845.1	17908.8	19934.8	27266.9	51283.5	81294.4	98585.9	111538
527	14907.5	14620.6	17455.8	19647.4	27180.1	50194.1	79943.8	97503.1	108534
528	14838.4	14432.1	17556.6	19178.3	26109.8	49118.9	77847.4	93872.8	106649
529	14546.3	14592.4	17045.8	19285.8	25901.4	48274.3	75996.1	92233.9	103608
530	14365.4	14489.3	17076.6	18483.9	25303.7	47076.2	73876.7	90503	101379
531	14330.8	14313.5	16539.4	18372.3	25041.9	46444.5	72481.8	87210.1	98941.4
532	13975.1	13497.2	16216.6	17755.6	24664.3	44907.7	69174.3	85619.5	96331.2
533	13426.8	13602.1	15651.9	17360	23149.2	43751.9	67819.1	82400.5	93335.2
534	12721.4	12844.5	15155.3	16786.9	22370.4	42639.4	65625.5	80700.3	90640.5
535	12788	12349	14746.2	16226.5	22174.6	41670.6	64439.5	78974.4	88525.8
536	12476.3	12094.5	14417.8	16160.8	21783.9	39876.4	62880	76190	86036.7
537	12376.1	12018.3	13964	15676.4	21138.4	39447.6	61399.4	74081.4	83902.8
538	12037.7	12260.7	14071.5	15353.7	20662.7	38031.9	59354.9	72571.9	82391
539	11800.4	11547.1	13538	14517.1	20336.9	37082.6	57924.7	70547.9	79283.9
540	11588.8	11424.3	13469.4	14452.6	20072	36569.2	56830.1	68365.7	77938.8
541	11206.3	11133.8	13208.3	14192.7	18888.5	35295.5	55158.2	66420.5	76056.8
542	11255.9	10990.8	12856.9	13756.5	18571.1	34170.6	53230.3	65227.8	73862.6
543	10758.9	10881.9	12815.8	13461.5	18110.5	33472.1	52835.3	63449.7	71653.8
544	10720.6	10374.5	12351.5	13321.3	18400.2	33129.3	51131.6	61703.6	69616.4
545	10509	10309.3	12012	13071.1	17573.4	32082.7	48974.7	60323.3	67931.1
546	10360.8	10511.6	12093.4	13338.9	17058.6	31458.1	48354	58909.4	66575.1
547	9986.72	9999.57	11601.7	12474.1	16590.4	30186	47397.5	57426.3	64827.4
548	10067.3	9890.38	11492.5	12059	16253.3	29692.9	45927.1	56067.8	63078.9
549	9619.36	9518.5	11135.9	12072.3	16007.4	29402.3	45088.9	54769.8	61835
550	9364.2	9565.5	10906.9	11563.1	15804.9	28074.7	43168	53415.5	59922.4
551	9468.58	9383.74	10854.8	11416.9	15204.4	27219.2	42313.4	52347.9	58218.4
552	9104.86	8824.17	10636.7	11361.8	14818.2	27041.6	41110.6	50577	57058.8
553	9064.42	8777.98	10420.6	10887.9	14315.4	26288.6	40541.5	49138.8	55797.8
554	8668.95	8616.89	10057.2	10593.9	13941.2	25702.4	39631.2	47778.5	53720.6
555	8791.9	8600.34	10001.5	10624.2	14003.6	25441.7	38770.3	46995.2	52298.8
556	8596.98	8475.45	9771.74	10416.4	13531.4	23920.5	37281.5	45341.2	51506.4
557	8319.69	8344.26	9873.92	10362.3	13363.9	23884.4	36487.4	44822.8	50145.6
558	8481.7	7646.5	9225.65	9847.76	13033.8	22622.1	35786.1	42661.7	48548.5
559	7946.53	7979.83	9050.48	9747.48	12777.8	22201.3	34629.3	42228.7	47784.9
560	8098.35	7668.53	8906.42	9412.56	12368.3	22211.7	33539.1	40740.7	46507.6
561	7924.94	7620.34	8816.84	9516.12	12224.8	21273.5	32819.2	39446.7	45454.7
562	7687.7	7514.21	8797.38	9054.05	11792.6	21124.5	31983.3	38585.7	43594.9
563	7741.17	7654.93	8510.17	9291.26	11731.6	20468.3	31539.3	37798.3	43035
564	7773.55	7334.44	8589.21	8917.85	11544.8	20033	30677.8	37035	42265.6
565	7891.27	7815.26	8470.24	9302.12	11834.7	20383.1	30494	36838.4	41748
566	7912.02	7862.08	8621.95	9209.52	11532.4	19676.7	29851.6	36037.1	40297.9
567	7998.73	7741.15	8559.27	8862.66	11368.2	19408.8	28980.5	35087.5	39935.1
568	7693.02	7339.92	8547.3	8668.55	10989.3	18558	28442	33933.4	38854.2
569	7212.92	7190.66	8129.13	8434.74	10890.5	18148.2	27207.3	32935.7	37798.2
570	6862.98	6702.73	7664.67	7819.97	10298.9	17459.2	26520.6	31767	36366.2
571	6623.67	6515.84	7499.27	7710.91	9667.68	16707.2	25166.7	31071.7	35254.3
572	6256.22	6016.7	7253.56	7371.02	9488.64	16508.7	25075.9	29757.3	33755.4
573	6175.37	5912.63	6921.6	7320.24	9189.06	15948.1	23949	29247.5	32943.8
574	5900.33	5595.03	6580.73	6934.83	8760.3	15298.2	23816.1	28781.7	32550.5
575	5868.37	5673.62	6378.58	7002.12	8851.85	15274.2	22976.6	27653	31666.6
576	5843.55	5703.36	6475.97	6928.03	8409.3	14919.5	22750	26601	31126.6
577	5678.31	5535.28	6388.16	6607.39	8261.75	14501.9	21773	26815.1	29691.2
578	5326.45	5351.3	6260.79	6609.64	8026.14	13798.2	21379.9	25702.2	29696.4
579	5287.57	5284.24	6464.07	6182.16	7772.35	13702.5	21126.7	25574.8	28731.9
580	5481.01	5290.4	6018.85	6385.11	7740.7	13432.8	20508.2	24195.3	27745.3
581	5204.25	4959.29	5954.2	6080.46	7591.66	13261.1	19775	24105.8	27162
582	5192.28	5119.81	5749.58	5941.42	7579.63	12580.4	19416.4	23375.1	26366.9
583	5281.62	4835.48	5691.52	5795.78	7147.8	12683.1	19042.4	22785.8	25631.2
584	5087.32	5052.37	5524.94	5622.53	7087.57	12149.6	18662.1	21889.3	25086.8
585	5015.48	4697.21	5637.89	5563.65	6923.52	11896.4	17694	21480.2	24535.9
586	4930.1	4664.96	5330.71	5599.34	6795.59	11577.6	17532	21488.1	24327.4
587	4872.38	4248.78	5277.32	5535.37	6702.63	11465.4	17265.8	20441.3	22803.1
588	4553.01	4684.31	5171.84	5402.99	6638.39	11387.9	17014.8	20181.4	22882.5
589	4613.96	4363.95	4855.94	4988.65	6481.8	10833	16445.8	19374	22179.1
590	4493.1	4323.89	4856.77	5084.15	6059.44	10759.1	15935	19341.7	22120.4
591	4400.41	4164.49	5077.4	4890.7	6157.81	10637.9	15278.5	18708.6	21221
592	4373.19	3973.09	4732.24	4746.69	6390.28	10128.9	14877.5	18053.7	20764.7
593	4238.8	4159.9	4770.36	4776.56	5905.64	10175	15070.2	18307.3	19876.6
594	4087.86	4089.5	4523.52	4720.81	5733.35	9450.78	14525.7	17066.7	19905.1
595	4101.99	3899.95	4492.32	4761.46	5711.17	9264.03	13977.1	17369.4	18736.9
596	3928.39	3878.69	4336.55	4610.63	5672.94	9422.42	13852.1	16175	18455.9
597	3895.11	3769.64	4383.45	4429.07	5435.37	8818.3	13325.7	15989.6	18489
598	3784.76	3661.76	4254.43	4350.21	5382.99	8809.84	12875.7	15562.1	18048.6
599	3705.03	3706.21	4190.43	4294.25	5254.6	8604.94	12495.2	14699	17311.6
600	3565.99	3488.35	3964.39	4093.72	4762.26	8466.05	12605.5	15079.2	16947.8
601	4040.94	3762.27	3905.03	4100.91	4929.93	8285.49	12215.5	14408.7	16623.3
602	3504.11	3504.66	3928.11	4083.32	4796.51	8500.69	11597.5	14384.3	15994.3
603	3465.8	3611.36	3980.89	3988.05	4690.62	7842.21	11627.4	13795.9	15535.9
604	3506.15	3446.2	3920.77	3963.45	4661.68	7712.95	11202.5	13291.3	15198.6
605	3376.6	3500.31	3672.35	3711.19	4428.35	7793.04	11223.5	13165.8	15254.6
606	3675.6	3401.13	3620.76	3663.13	4568.56	7513.16	10693.2	12910.6	15047.1
607	3303.05	3285.68	3646.78	3706.8	4340.71	7083.44	10432.6	12585.9	14575.9
608	3257.2	3154.58	3627.55	3579.21	4130.26	6775.19	10091	12358.9	13920.4
609	3239.04	2963.37	3473.2	3521.88	4298.09	6694.78	9996.71	12040.2	13378.6
610	3295.21	3152.78	3397.48	3495.46	4078.06	6660.21	9959.92	11717.3	13380.6
611	2914.67	2999.58	3249.97	3369.22	4129.44	6393.84	9599.77	11724.7	13007.9
612	3093.15	2911.66	3353.49	3462.28	4184.82	6624.25	9782.47	10956	12630.3
613	3015.68	2937.19	3377.28	3419.04	3939.94	6294.96	9105.02	11413.5	12606
614	3156.46	3027.81	3361.65	3397.7	3922.24	6242.53	9213.4	10513.1	12506.5
615	3007.18	2874.68	3309.04	3272.65	4060.43	6090.69	9001.38	10863	12264.6
616	3152.61	3007.04	3122.07	3104.99	3927.02	6038.99	8669.62	10189.9	11839.9
617	2936.76	2960.34	3080.11	3360.74	3672.45	6168.65	8763.34	10294.8	11589.1
618	3041.27	2940.99	3050.3	3176.37	3780.59	5854.12	8483.59	10247	11415.3
619	2731.22	2889.71	3062.18	3185.08	3622.25	5697.88	8349.24	9869.41	10999
620	2636.96	2741.75	2996.93	3110.07	3554.56	5527.91	8030.75	9378.97	10791.2
621	2969.76	2483.8	2840.46	2876.56	3565.45	5562.74	8308.22	9490.18	10904.9
622	2547.97	2501.41	2704.92	2926.81	3568.67	5371.24	8033.22	9185.6	10158.8
623	2669.78	2625.85	2992.17	2882.02	3379.6	5163.61	7365.53	8789.8	10051.6
624	2600.04	2525.46	2879.25	2720.69	3210.56	4991.18	6995.38	8582.74	9701.49
625	2370.23	2416.63	2713.94	2590.46	3217.35	4917.18	6897.1	8307.22	9423.88
626	2255.39	2349.08	2673.18	2648.78	3265.49	4789.95	6625.35	8387.46	9343.5
627	2474.27	2265.48	2545.01	2578.33	3039.25	4390.84	6801.15	8069.39	9094.1
628	2411.79	2407.06	2739.62	2505.66	2911.87	4543.69	6821.18	8037.56	8954
629	2435.76	2358.95	2366.57	2484.55	2889.24	4504.23	6410.21	7533.78	8674.84
630	2567.12	2218.14	2496.29	2459.45	3079.14	4333.93	6343.56	7459.1	8707.88
631	2202.24	2342.6	2526.28	2557.2	2754.82	4603.32	6155.73	7369.73	8220.5
632	2542.04	2242.19	2412.33	2587.11	2959.16	4391.44	6082.82	7313.19	8542.92
633	2569.92	2294.19	2550.62	2379.69	2665.05	4279.21	6238.63	7032.42	8065.92
634	2369.05	2122.79	2479.87	2417.18	2694.34	4152.21	5912.57	6628.95	7628.43
635	2158.18	2108.49	2408.07	2393.27	2626.64	3980.13	6047.58	6790.97	7995.81
636	2177.42	2185.55	2304.63	2423.97	2486.14	4013.14	5660.13	6681.14	7129.43
637	2083.97	2039.97	2369.42	2283.23	2488.49	3853.74	5726.24	6785.94	7443.32
638	2109.96	2005.98	2291.94	2216.96	2763.46	3908.43	5651.78	6540.62	7526.45
639	2080.96	2151.97	2184.82	2307.11	2346.16	3822.74	5154.11	6067.24	7005.1
640	2324.1	2053.47	2120.1	2092.82	2572.21	3837.98	5189.69	6083.33	7309.09
641	2078.66	2191.39	2200.44	2227.75	2460.59	3763.43	5198.51	6539.57	6980.91
642	2251.93	2118.49	2201.63	2276.91	2747.76	3819.75	5202.87	6154.66	6881.64
643	2319.84	2561.14	2333.36	2340.89	2543.48	3883.12	5048.59	6182.14	6843.28
644	2654.59	2553.5	2800.87	2603.94	2868.67	4370.56	5179	6615.04	7360.32
645	3102.61	3362.61	3186.27	3195.96	3657.93	4405.71	5699.59	7086.12	7970.9
646	3763.26	4041.12	3903.5	4011.14	4169.81	5236.91	6677.16	7860.14	8993.2
647	5020.42	4981.75	4784.39	4789.67	4702.8	6128.12	7608	8466.34	10339
648	5829.94	5742.06	5592.44	5091.33	4975.09	6422.12	8215.48	9418.38	11196.4
649	6258.78	5730.63	5717.61	5902.34	5496.19	7032.94	8306.58	9464.88	11604.4
650	5583.03	5715.68	5271.29	5640.93	5533.4	6946.89	8257.72	8663.17	11522.2
651	5202.66	5071.62	4980.68	5030.46	5078.54	6014.13	7269.25	8707.01	10090.9
652	4252.92	4227.05	4259.01	4102.25	3971.86	5127.56	6830.91	7475.83	9062.9
653	3435.05	2901.74	3365.32	3141.37	3559.37	4577.87	6023.68	6553.18	7811.49
654	2684.05	2532.66	2679.55	2742.63	2856.57	3607.33	4686.83	5785.22	6610.1
655	2069.53	2030.34	2203.74	2471.8	2229.49	3389.74	4514.36	5282.66	6046.56
656	2015.02	1914.23	1961.34	1991.19	2232.52	3214	4098.32	4901.65	5444.96
657	2294.06	2042.38	1853.12	1853.59	2073.39	3088.62	4012.13	4619.69	5435.3
658	1861.6	1736.85	1987.56	2141.7	2186.95	2968.61	4259.49	4896.71	5475.06
659	2233.4	1689.19	1994.31	1996.4	2175.75	2838.06	4252.81	4696.61	5308.58
660	2045.22	1839.51	1883.69	1938.77	2138.15	2612.53	3992.09	4731.39	5166.97
661	2009.6	1817.14	1850.91	2053.31	2149.59	3057.46	4019.55	4490.47	5149.85
662	2107.92	1661.01	1943.88	1945.07	2090.03	2652.76	3793.72	4570.52	5151.44
663	1949.89	2208.42	1907.86	2007.75	2176.26	2933.4	4051.98	4569.61	4953.51
664	1792.91	1883.72	2114.13	1825.31	1848.2	2625.02	3641.65	4368.77	4531.05
665	1897.86	1934.96	2011.21	1818.15	2279.42	2865.21	3753.47	4461.41	4887.17
666	1931.76	1952.6	1824.74	2001.55	2054.16	3095.46	3690.08	4356.07	5013.27
667	1733.64	1890.07	1735.59	1822.04	1945.63	2896.84	3642.21	4032.69	5059.82
668	2041.63	1947.77	1855.98	2026.88	1927.74	2619.32	3513.46	4289.2	5004.65
669	2055.87	1901.74	2210.58	2077.93	1953.06	2694.18	3597.82	3866.4	4842.54
670	2176.79	2049.8	2102.45	1985.53	2178.75	2959.48	3824.25	4136.32	4895.26
671	1991.23	1831.43	2045.06	1931.39	2219.24	2666.25	3346.53	4284.3	4933.54
672	1860.51	2086.39	2072.56	1923.83	2129.95	2738.22	3691.63	4041.94	4930.28
673	1726.81	1701.71	1713.87	1666.03	1874.83	2643.49	3652.53	4142.01	4590.48
674	1830.83	2244.61	1932.27	2267.18	2099.19	2627.52	3485.04	3919.5	4855.58
675	1879.62	2242.3	2008.77	2375.56	2087.08	2648.5	3322.02	3881.41	4830.84
676	2107.63	2207.36	1995.74	2021.45	2113.7	2780.7	3337.09	4413.8	4486.11
677	2264.16	2255.89	2062.09	2180.07	2022.68	2798.48	3282.37	3835.81	4694.27
678	2250.88	2129.12	2211.58	2236.81	2091.11	2861.87	3539.66	3880.2	4564.13
679	2257.72	2275.03	2069.07	1869.52	2081.37	3142.87	3534.68	3790.5	4886.7
680	582.94	635.805	768.427	815.581	854.161	1180.37	1647.05	1896.29	2241.56
681	653.327	707.384	686.667	726.567	708.009	1217.44	1733.07	2020.48	2316.99
682	620.107	660.192	645.265	706.75	875.914	1089.32	1844.06	1881.78	2393.35
683	557.424	633.476	755.963	753.063	851.279	1126.89	1716.44	1879.07	2264.73
684	572.557	664.276	737.676	600.905	774.111	799.549	1569.06	1854.31	2116.21
685	588.292	629.699	764.097	609.781	831.053	1092.29	1544.59	1980.31	1972.76
686	633.807	608.823	585.053	633.533	820.979	1098.52	1611.42	2052.67	2170.81
687	680.128	586.422	669.762	703.846	676.782	902.903	1448.71	1667.99	1817.08
688	620.841	571.609	632.465	627.732	630.554	1097.65	1492.29	1549.23	1761.84
689	606.444	548.497	601.811	597.297	647.396	1177.92	1209.1	1506.62	1818.79
690	670.623	588.291	545.913	654.236	632.836	1056.89	1333.14	1788.89	2015.81
691	488.274	685.459	708.795	541.06	781.992	1014.23	1484.26	1435.71	1657.05
692	592.841	507.265	487.932	607.66	759.801	1087.86	1313.61	1733.13	1834.15
693	676.002	456.765	545.693	650.749	525.516	841.345	1256.54	1436.32	1674.13
694	501.795	387.8	451.186	557.553	628.011	1008.95	1430.45	1310.28	1681.36
695	559.928	461.965	638.582	582.966	610.809	997.635	1128.01	1451.57	1750.37
696	559.598	495.078	481.552	635.392	681.458	790.034	1248.76	1420.55	1794.84
697	576.499	528.671	648.563	528.02	664.266	837.874	1113.85	1522.27	1668.12
698	593.758	571.571	523.016	608.225	728.517	859.674	1195.51	1334.86	1517.35
699	521.636	525.605	641.167	479.088	656.254	760.901	1166.86	1484.43	1493.94
700	428.922	349.401	446.282	523.51	535.023	799.933	1090.87	1261.05	1487.58

## Sheet: Sheet1
Wavelength(nm)	Control	0.65uM	1.30uM	2.60uM	5.20uM	10.41uM	20.83uM	41.66uM	83.33uM												Wavelength(nm)	Control	0.65uM	1.30uM	2.60uM	5.20uM	10.41uM	20.83uM	41.66uM	83.33uM
385	5169.14	5218.68	4864.55	4904.63	4651.81	5253.72	6127.42	6763.05	8168.42												385	51.6914	52.1868	48.6455	49.0463	46.5181	52.5372	61.2742	67.6305	81.6842
386	4914.29	4842.94	4564.34	4735.11	4417.3	5044.55	5947.88	6574.04	7861.49												386	49.1429	48.4294	45.6434	47.3511	44.173	50.4455	59.4788	65.7404	78.6149
387	4607.61	4392.26	4027.77	4293.19	4174.85	4827.85	5749.14	6150.75	7637.59												387	46.0761	43.9226	40.2777	42.9319	41.7485	48.2785	57.4914	61.5075	76.3759
388	4299.37	4281.69	4037.4	4075.11	3997.65	4727.41	5522.78	6301.21	7603.58												388	42.9937	42.8169	40.374	40.7511	39.9765	47.2741	55.2278	63.0121	76.0358
389	3922.26	4012.02	3820.41	3916.38	4088.66	4656.86	5582.53	6437.55	7509.95												389	39.2226	40.1202	38.2041	39.1638	40.8866	46.5686	55.8253	64.3755	75.0995
390	3754.09	3737.6	3569.93	3725.49	3775.69	4746.73	5940.58	6798.26	7920.04												390	37.5409	37.376	35.6993	37.2549	37.7569	47.4673	59.4058	67.9826	79.2004
391	3542.86	3530.86	3373.13	3400.65	3662.05	4745.94	6221.74	7052.92	8111.51												391	35.4286	35.3086	33.7313	34.0065	36.6205	47.4594	62.2174	70.5292	81.1151
392	3368.88	3301.53	3205.05	3454.6	3762.66	4987	6625.57	7855.11	8427.52												392	33.6888	33.0153	32.0505	34.546	37.6266	49.87	66.2557	78.5511	84.2752
393	3209.57	3241.9	3168.38	3263.11	3695.71	5280.69	7051.86	8330.27	9320.64												393	32.0957	32.419	31.6838	32.6311	36.9571	52.8069	70.5186	83.3027	93.2064
394	3006.47	2994.68	2963.43	3289.94	3775.58	5767.14	7828.91	9363.54	10311.4												394	30.0647	29.9468	29.6343	32.8994	37.7558	57.6714	78.2891	93.6354	103.114
395	2950.17	3071.15	3005.7	3398.62	4110.82	6213.23	8778.09	10487.7	11326.1												395	29.5017	30.7115	30.057	33.9862	41.1082	62.1323	87.7809	104.877	113.261
396	2903.61	3097.38	3005.07	3533.36	4388	6983.13	10090.1	11827.9	12656.8												396	29.0361	30.9738	30.0507	35.3336	43.88	69.8313	100.901	118.279	126.568
397	2905.6	3001.12	2988.74	3544.98	4526.63	7867.72	11434.4	13785.5	14552.8												397	29.056	30.0112	29.8874	35.4498	45.2663	78.6772	114.344	137.855	145.528
398	2754.44	2836.85	3081.63	3634.63	5135.58	8474.32	13157.4	15940.9	16665.3												398	27.5444	28.3685	30.8163	36.3463	51.3558	84.7432	131.574	159.409	166.653
399	2751.26	2878.86	3071.53	3728.74	5360.84	9543.41	15173.7	18073.4	18750.5												399	27.5126	28.7886	30.7153	37.2874	53.6084	95.4341	151.737	180.734	187.505
400	2515.06	2844.44	3071.59	4049.53	5964.42	10926.5	17203.6	20636.8	21732.2												400	25.1506	28.4444	30.7159	40.4953	59.6442	109.265	172.036	206.368	217.322
401	2554.96	2786.23	3364.97	4318.27	6545.45	12459.4	19734.3	24183.2	24961.4												401	25.5496	27.8623	33.6497	43.1827	65.4545	124.594	197.343	241.832	249.614
402	2499.91	2920.76	3434.09	4592.13	7167.79	14072.4	22678.2	27627.3	28841.7												402	24.9991	29.2076	34.3409	45.9213	71.6779	140.724	226.782	276.273	288.417
403	2492.7	3017.44	3476.39	5149.01	7766.14	15977	26419.2	31638	33042.5												403	24.927	30.1744	34.7639	51.4901	77.6614	159.77	264.192	316.38	330.425
404	2573.25	3027.57	3774.86	5356.44	9055.12	18162.8	30077.9	36386.3	37492.6												404	25.7325	30.2757	37.7486	53.5644	90.5512	181.628	300.779	363.863	374.926
405	2606.91	3125.22	4012.42	5914.75	10179.7	20334.6	34271.7	41312.4	43015												405	26.0691	31.2522	40.1242	59.1475	101.797	203.346	342.717	413.124	430.15
406	2721.7	3289.97	4318.47	6554.03	11245.3	23826.2	38760.4	46662.4	48956.8												406	27.217	32.8997	43.1847	65.5403	112.453	238.262	387.604	466.624	489.568
407	2783.44	3467.86	4610.57	7113.66	12568.8	26815.7	43973.7	53801	55130.9												407	27.8344	34.6786	46.1057	71.1366	125.688	268.157	439.737	538.01	551.309
408	3029.17	3793.85	5213.55	7904.07	14067.4	30277.7	49614.2	60143.9	62181.2												408	30.2917	37.9385	52.1355	79.0407	140.674	302.777	496.142	601.439	621.812
409	3199.18	4054.31	5720.74	8655.01	15490.4	33559.8	55450.8	67402.1	69245.1												409	31.9918	40.5431	57.2074	86.5501	154.904	335.598	554.508	674.021	692.451
410	3118.6	4000.73	6022.81	9364.53	17149.5	37450.6	63263.7	76830.7	78543.3												410	31.186	40.0073	60.2281	93.6453	171.495	374.506	632.637	768.307	785.433
411	3339.88	4472.54	6672.9	10369.2	19082.9	41822.8	69650.3	84610.1	87023.8												411	33.3988	44.7254	66.729	103.692	190.829	418.228	696.503	846.101	870.238
412	4015.04	5132.05	7536.95	11608.4	21166.7	45853.8	77038.9	93199.3	96204.3												412	40.1504	51.3205	75.3695	116.084	211.667	458.538	770.389	931.993	962.043
413	4475.1	5656.22	8416.69	12848	23567.5	50572	84508.4	102938	105538												413	44.751	56.5622	84.1669	128.48	235.675	505.72	845.084	1029.38	1055.38
414	5073.82	6391.56	9333.34	14147.4	25925.1	55554.3	93006.2	112133	116548												414	50.7382	63.9156	93.3334	141.474	259.251	555.543	930.062	1121.33	1165.48
415	5627.15	7109.6	10292.8	15469.7	28240.8	60396.7	100686	122619	127605												415	56.2715	71.096	102.928	154.697	282.408	603.967	1006.86	1226.19	1276.05
416	6259.93	7645.63	11244	16866.4	31151.2	65804	108827	132613	137504												416	62.5993	76.4563	112.44	168.664	311.512	658.04	1088.27	1326.13	1375.04
417	6770.25	8585.52	11925.3	17957	32842.6	70291.7	116842	141827	147309												417	67.7025	85.8552	119.253	179.57	328.426	702.917	1168.42	1418.27	1473.09
418	7097.43	8815.5	12663.7	18988.9	34951.1	75742.6	125483	151785	158778												418	70.9743	88.155	126.637	189.889	349.511	757.426	1254.83	1517.85	1587.78
419	7259.62	9028.7	13241.1	20030.7	36902	80320.8	133360	161697	168981												419	72.5962	90.287	132.411	200.307	369.02	803.208	1333.6	1616.97	1689.81
420	7309.23	9326.34	13944.8	21025.6	39102.4	85226.6	142045	172756	179178												420	73.0923	93.2634	139.448	210.256	391.024	852.266	1420.45	1727.56	1791.78
421	7414.67	9304.87	14000.2	22211.6	41426.6	90151.2	148482	181328	189180												421	74.1467	93.0487	140.002	222.116	414.266	901.512	1484.82	1813.29	1891.8
422	7490.01	9511.61	14684.6	22832.5	42574	93897.7	157215	191406	200096												422	74.9001	95.1161	146.846	228.325	425.74	938.977	1572.15	1914.06	2000.96
423	7636.68	9743.83	14888.4	23874.9	44692.6	98091.7	164591	199656	209518												423	76.3668	97.4383	148.884	238.749	446.926	980.917	1645.91	1996.56	2095.18
424	7749.07	10442.5	15743.5	24463.6	47416.6	103208	173040	209332	219619												424	77.4907	104.425	157.435	244.636	474.166	1032.08	1730.4	2093.32	2196.19
425	8249.47	10566.5	16009.5	25782.2	49162.6	107351	178505	219090	230274												425	82.4947	105.665	160.095	257.822	491.626	1073.51	1785.05	2190.9	2302.74
426	8771.53	11129.5	16807.8	27176.1	51260.4	112343	186966	228532	239337												426	87.7153	111.295	168.078	271.761	512.604	1123.43	1869.66	2285.32	2393.37
427	9252.97	11746.3	17649.5	28110.9	52976.7	115641	193875	237017	249763												427	92.5297	117.463	176.495	281.109	529.767	1156.41	1938.75	2370.17	2497.63
428	9724.78	12289.7	18318.6	29175.3	55702.9	120996	201460	245309	259454												428	97.2478	122.897	183.186	291.753	557.029	1209.96	2014.6	2453.09	2594.54
429	10124.2	13011.5	19432.9	30469.8	56845.9	124928	207354	253827	267717												429	101.242	130.115	194.329	304.698	568.459	1249.28	2073.54	2538.27	2677.17
430	10745.7	13670.5	20207	31687.6	59422.1	129051	215746	261004	276885												430	107.457	136.705	202.07	316.876	594.221	1290.51	2157.46	2610.04	2768.85
431	11315.2	14239.4	21081.4	33178	61078.3	133456	221792	269872	284999												431	113.152	142.394	210.814	331.78	610.783	1334.56	2217.92	2698.72	2849.99
432	12131	14696.5	22189.4	33642.9	63065.2	137572	228218	276882	294081												432	121.31	146.965	221.894	336.429	630.652	1375.72	2282.18	2768.82	2940.81
433	12809.5	15402.6	22733.6	34873.2	64467.9	140330	232885	283858	300427												433	128.095	154.026	227.336	348.732	644.679	1403.3	2328.85	2838.58	3004.27
434	13071.1	16138.7	23660.7	35742	66387.4	143916	239059	289461	309397												434	130.711	161.387	236.607	357.42	663.874	1439.16	2390.59	2894.61	3093.97
435	13721.8	16712.8	24169.3	36709.9	68238.6	146979	242725	294452	313689												435	137.218	167.128	241.693	367.099	682.386	1469.79	2427.25	2944.52	3136.89
436	14093.3	16918.4	25055.6	38003.6	68881.1	149048	247879	300269	319953												436	140.933	169.184	250.556	380.036	688.811	1490.48	2478.79	3002.69	3199.53
437	15085.7	17757.9	25790.9	38743.5	70538.9	152330	252581	307279	325745												437	150.857	177.579	257.909	387.435	705.389	1523.3	2525.81	3072.79	3257.45
438	15650.6	18097.7	26324.1	39424.4	72292	154765	255509	309780	330880												438	156.506	180.977	263.241	394.244	722.92	1547.65	2555.09	3097.8	3308.8
439	15955.8	18691.7	27090.9	40222.9	72751	157068	259152	314042	337274												439	159.558	186.917	270.909	402.229	727.51	1570.68	2591.52	3140.42	3372.74
440	16691.3	19582.8	27612.6	41136.7	74309	160253	262591	319529	339175												440	166.913	195.828	276.126	411.367	743.09	1602.53	2625.91	3195.29	3391.75
441	17363.6	20047.9	28371.2	41683.3	74860.5	161284	266214	322810	344132												441	173.636	200.479	283.712	416.833	748.605	1612.84	2662.14	3228.1	3441.32
442	17898.5	20829	29099.1	42267.9	75881.1	163937	268900	325312	347620												442	178.985	208.29	290.991	422.679	758.811	1639.37	2689	3253.12	3476.2
443	18239.4	21160.9	29457.6	43088.7	77116.9	163921	270539	328432	350775												443	182.394	211.609	294.576	430.887	771.169	1639.21	2705.39	3284.32	3507.75
444	18604.9	21235.8	30383.1	44122.5	77527	166504	272935	330730	354538												444	186.049	212.358	303.831	441.225	775.27	1665.04	2729.35	3307.3	3545.38
445	19430.1	22154.8	30916.3	44304.1	78364	167294	274110	332964	356198												445	194.301	221.548	309.163	443.041	783.64	1672.94	2741.1	3329.64	3561.98
446	20084.5	22704.3	31838.6	45168.3	79762.6	169732	276897	334348	360553												446	200.845	227.043	318.386	451.683	797.626	1697.32	2768.97	3343.48	3605.53
447	21131.6	23444.3	32501.6	45814.3	80481.6	170253	277798	337245	362018												447	211.316	234.443	325.016	458.143	804.816	1702.53	2777.98	3372.45	3620.18
448	21481.9	24082.7	33245	46592.8	80876	170563	278693	338608	363372												448	214.819	240.827	332.45	465.928	808.76	1705.63	2786.93	3386.08	3633.72
449	21873.5	24314.6	33724	46375.6	81207.4	170887	278672	339533	365507												449	218.735	243.146	337.24	463.756	812.074	1708.87	2786.72	3395.33	3655.07
450	22056.9	24194.8	33223.1	46958	80973.9	171629	280142	338267	365019												450	220.569	241.948	332.231	469.58	809.739	1716.29	2801.42	3382.67	3650.19
451	21999.9	24555.6	33076.3	46737	81106.8	171187	279838	338899	365386												451	219.999	245.556	330.763	467.37	811.068	1711.87	2798.38	3388.99	3653.86
452	22326.9	24841.3	33680.2	46490.7	81341.6	171598	279681	339598	365500												452	223.269	248.413	336.802	464.907	813.416	1715.98	2796.81	3395.98	3655
453	22717.5	24623.4	34072.4	46686.4	80676.7	171682	280232	339761	366907												453	227.175	246.234	340.724	466.864	806.767	1716.82	2802.32	3397.61	3669.07
454	22567	25172	33859.1	46325	81431.9	171147	278477	338563	365077												454	225.67	251.72	338.591	463.25	814.319	1711.47	2784.77	3385.63	3650.77
455	23369.2	25509.8	34300.4	47433.1	81401.5	170559	279012	338665	364275												455	233.692	255.098	343.004	474.331	814.015	1705.59	2790.12	3386.65	3642.75
456	23562.9	25732	34274.2	47282.9	80822.2	169743	277388	337242	363559												456	235.629	257.32	342.742	472.829	808.222	1697.43	2773.88	3372.42	3635.59
457	23929.3	25948.7	35011.8	46973	80751.1	169244	275815	334419	362555												457	239.293	259.487	350.118	469.73	807.511	1692.44	2758.15	3344.19	3625.55
458	24313	26204.3	34708.8	47570.9	80351.2	168396	275009	332133	361373												458	243.13	262.043	347.088	475.709	803.512	1683.96	2750.09	3321.33	3613.73
459	24056	26070.7	35153.5	47803.1	80601.4	167666	273090	331604	358349												459	240.56	260.707	351.535	478.031	806.014	1676.66	2730.9	3316.04	3583.49
460	24692.2	26593.2	35186.9	47544.8	80195.5	166825	272193	329827	357270												460	246.922	265.932	351.869	475.448	801.955	1668.25	2721.93	3298.27	3572.7
461	24550.4	26949.2	34957.4	47621.1	80020.5	166876	270665	327681	355749												461	245.504	269.492	349.574	476.211	800.205	1668.76	2706.65	3276.81	3557.49
462	25099.2	27152.1	35720.4	47332.6	80111.5	165341	268588	326290	353535												462	250.992	271.521	357.204	473.326	801.115	1653.41	2685.88	3262.9	3535.35
463	25589.1	26971.4	35544.8	47649.7	78557	164187	266287	323049	351956												463	255.891	269.714	355.448	476.497	785.57	1641.87	2662.87	3230.49	3519.57
464	25555.2	27008.5	35535.8	47173.1	77963.9	162938	263882	320753	347566												464	255.552	270.085	355.358	471.731	779.639	1629.38	2638.82	3207.53	3475.66
465	25699.7	27224.8	35747.3	47016.4	77881.1	161640	261760	317451	345773												465	256.997	272.248	357.473	470.164	778.811	1616.4	2617.6	3174.51	3457.73
466	25734.4	26969.3	35684	47356.6	76786.4	159371	259778	314554	342481												466	257.344	269.693	356.84	473.566	767.864	1593.71	2597.78	3145.54	3424.81
467	25914	27642.7	35449	47239.6	76673.4	157505	256409	311964	340234												467	259.14	276.427	354.49	472.396	766.734	1575.05	2564.09	3119.64	3402.34
468	25672.5	27739.6	35537.5	46710.7	76065.6	156905	254967	308542	336531												468	256.725	277.396	355.375	467.107	760.656	1569.05	2549.67	3085.42	3365.31
469	26226.1	27359.5	35442.8	46219.9	74810.3	154574	251405	304141	333424												469	262.261	273.595	354.428	462.199	748.103	1545.74	2514.05	3041.41	3334.24
470	25956.2	27209.2	35409.6	45950.2	74044.4	153117	248543	301165	328623												470	259.562	272.092	354.096	459.502	740.444	1531.17	2485.43	3011.65	3286.23
471	25924.1	27525.6	35178.9	45552.5	73592.8	151481	246728	298226	325666												471	259.241	275.256	351.789	455.525	735.928	1514.81	2467.28	2982.26	3256.66
472	26089.8	27150.3	35288.9	44946.5	73045.9	150726	242399	294822	321241												472	260.898	271.503	352.889	449.465	730.459	1507.26	2423.99	2948.22	3212.41
473	26339.6	26921	34962.9	44655.1	71784.1	147147	239737	290684	317784												473	263.396	269.21	349.629	446.551	717.841	1471.47	2397.37	2906.84	3177.84
474	26290.2	26856.1	34541.6	44472.2	71011.2	146505	234869	285831	313995												474	262.902	268.561	345.416	444.722	710.112	1465.05	2348.69	2858.31	3139.95
475	25942.5	26920.2	34406.1	43992.1	70600.2	143420	233399	282812	309408												475	259.425	269.202	344.061	439.921	706.003	1434.2	2333.99	2828.12	3094.08
476	25704.9	26882.3	34450.8	43803.1	68863.7	141805	229801	278603	306160												476	257.049	268.823	344.508	438.031	688.637	1418.05	2298.01	2786.03	3061.6
477	26124	26997.9	34212.6	43225.5	68806.3	139740	226763	274332	303240												477	261.24	269.979	342.126	432.255	688.063	1397.4	2267.63	2743.32	3032.4
478	25928.7	26634	33939.3	42858.8	67392.2	138699	223030	271322	297808												478	259.287	266.34	339.393	428.588	673.923	1386.99	2230.3	2713.22	2978.08
479	25918.3	26661.9	33627.5	42336.2	66804.1	135900	220693	267932	294813												479	259.183	266.619	336.275	423.362	668.041	1359	2206.93	2679.32	2948.13
480	25856.9	26726.5	33769	41696	66453	133639	216680	263741	290538												480	258.569	267.265	337.69	416.96	664.53	1336.39	2166.8	2637.41	2905.38
481	25559.4	26557.5	33497.6	41368.1	65403.3	131984	213634	260739	286194												481	255.594	265.575	334.976	413.681	654.033	1319.84	2136.34	2607.39	2861.94
482	25395.1	26063.2	33296.5	41237.2	64184.7	129917	209577	254542	280798												482	253.951	260.632	332.965	412.372	641.847	1299.17	2095.77	2545.42	2807.98
483	25252.7	26309.2	32743.2	40378.3	62971.4	128327	206770	249614	276492												483	252.527	263.092	327.432	403.783	629.714	1283.27	2067.7	2496.14	2764.92
484	25172.1	25356.6	32781.1	40312.3	62100.3	125594	202444	245786	272612												484	251.721	253.566	327.811	403.123	621.003	1255.94	2024.44	2457.86	2726.12
485	25130.5	25339.8	32122.6	39892.5	60969.4	124091	199846	242587	267572												485	251.305	253.398	321.226	398.925	609.694	1240.91	1998.46	2425.87	2675.72
486	24887.4	25717	31783.6	38887.3	60445.7	121423	195287	238269	263937												486	248.874	257.17	317.836	388.873	604.457	1214.23	1952.87	2382.69	2639.37
487	24870	25511.4	31218.3	38574.9	58668.7	119602	191504	234171	259088												487	248.7	255.114	312.183	385.749	586.687	1196.02	1915.04	2341.71	2590.88
488	24470.2	24780.7	31112.8	38278.3	58266.8	117807	188511	229502	253081												488	244.702	247.807	311.128	382.783	582.668	1178.07	1885.11	2295.02	2530.81
489	24339.8	24525.9	30687.3	37650.3	57225.6	115396	185312	225273	248889												489	243.398	245.259	306.873	376.503	572.256	1153.96	1853.12	2252.73	2488.89
490	24061.4	24563.8	30550.8	36712.4	56106.8	112956	182030	221065	245996												490	240.614	245.638	305.508	367.124	561.068	1129.56	1820.3	2210.65	2459.96
491	23905.8	24606.2	30436.1	36144.9	55336.1	110718	177841	216728	240775												491	239.058	246.062	304.361	361.449	553.361	1107.18	1778.41	2167.28	2407.75
492	23999.6	24200.1	29646.4	36492.4	54371.2	108733	174859	213444	237099												492	239.996	242.001	296.464	364.924	543.712	1087.33	1748.59	2134.44	2370.99
493	23478.8	23902.3	29480.4	35859.9	53114.5	107513	171271	209179	231706												493	234.788	239.023	294.804	358.599	531.145	1075.13	1712.71	2091.79	2317.06
494	23252	23676.8	29041.4	35005	53136.5	104418	168503	205232	227099												494	232.52	236.768	290.414	350.05	531.365	1044.18	1685.03	2052.32	2270.99
495	23075.7	23407	28840.5	34690.6	51500.9	102698	165148	201176	223737												495	230.757	234.07	288.405	346.906	515.009	1026.98	1651.48	2011.76	2237.37
496	23054.3	22929.5	28626.5	33734.5	50983.9	101135	161842	197030	218377												496	230.543	229.295	286.265	337.345	509.839	1011.35	1618.42	1970.3	2183.77
497	22392.8	22766.7	28120.7	33297.5	49745.7	99072.7	158827	193187	215279												497	223.928	227.667	281.207	332.975	497.457	990.727	1588.27	1931.87	2152.79
498	22343.2	22487.2	27650	33174.9	49006.6	97060	156371	189036	211610												498	223.432	224.872	276.5	331.749	490.066	970.6	1563.71	1890.36	2116.1
499	22073.3	22154.9	27382.3	32643.4	48102.5	94781	152881	185466	205851												499	220.733	221.549	273.823	326.434	481.025	947.81	1528.81	1854.66	2058.51
500	21941.2	21933.2	27179.1	31928.1	46809.6	92744.6	148704	182129	201509												500	219.412	219.332	271.791	319.281	468.096	927.446	1487.04	1821.29	2015.09
501	21704.4	21618.9	26909.2	31306	46202.5	90492.5	145205	176969	198056												501	217.044	216.189	269.092	313.06	462.025	904.925	1452.05	1769.69	1980.56
502	21197.7	21291.7	26294.2	31058.1	45666	88683.8	143494	173962	192939												502	211.977	212.917	262.942	310.581	456.66	886.838	1434.94	1739.62	1929.39
503	21022.4	21362.5	26054.8	30406.4	44296.8	87317.1	139356	169395	190465												503	210.224	213.625	260.548	304.064	442.968	873.171	1393.56	1693.95	1904.65
504	20857.3	20710.3	25372	29697.1	43811.8	85805.1	136371	167661	185432												504	208.573	207.103	253.72	296.971	438.118	858.051	1363.71	1676.61	1854.32
505	20759.9	20836.9	25051.9	29278.7	43097.5	83619.1	134271	162503	182627												505	207.599	208.369	250.519	292.787	430.975	836.191	1342.71	1625.03	1826.27
506	20511.2	20036.3	25075.1	28795.8	41921.1	81991.2	130206	159627	177617												506	205.112	200.363	250.751	287.958	419.211	819.912	1302.06	1596.27	1776.17
507	20040.3	19981.5	24490.4	28170.7	41678.9	80225.4	127166	155079	174007												507	200.403	199.815	244.904	281.707	416.789	802.254	1271.66	1550.79	1740.07
508	19364.9	19652.7	24359.2	27583.3	40396.7	78195.9	124445	151599	169344												508	193.649	196.527	243.592	275.833	403.967	781.959	1244.45	1515.99	1693.44
509	19278.1	19127.3	23795.6	27485.5	39269.8	76383.6	121353	148002	166266												509	192.781	191.273	237.956	274.855	392.698	763.836	1213.53	1480.02	1662.66
510	19301.3	19109.1	23120.3	26706.7	38961.5	74508	119589	144623	161695												510	193.013	191.091	231.203	267.067	389.615	745.08	1195.89	1446.23	1616.95
511	18860.1	19126.6	22494.8	26526	37653.2	73395.3	116305	141294	158983												511	188.601	191.266	224.948	265.26	376.532	733.953	1163.05	1412.93	1589.83
512	18726.6	18924.2	22706.1	25691.4	36904.5	71344.6	113742	139052	154956												512	187.266	189.242	227.061	256.914	369.045	713.446	1137.42	1390.52	1549.56
513	18375.8	18280.6	22607.8	25457.3	36500.6	70342.3	111976	135894	152211												513	183.758	182.806	226.078	254.573	365.006	703.423	1119.76	1358.94	1522.11
514	17860.8	18338.5	22201.7	25050.9	35661.7	68721.8	109320	132180	149120												514	178.608	183.385	222.017	250.509	356.617	687.217	1093.2	1321.8	1491.2
515	17887.3	17569.3	21339.9	24293	34736.5	66915.1	105854	128643	145563												515	178.873	175.693	213.399	242.93	347.365	669.151	1058.54	1286.43	1455.63
516	17417.2	17605.1	20983.7	24369.5	34160	65580.7	103701	126798	141249												516	174.172	176.051	209.837	243.695	341.6	655.807	1037.01	1267.98	1412.49
517	17403.7	17503.8	20770	23395.3	33600.9	64566.8	101533	123119	138500												517	174.037	175.038	207.7	233.953	336.009	645.668	1015.33	1231.19	1385
518	17305.1	16743.3	20327.3	23018.8	32695.2	62905.9	98889.1	120460	135448												518	173.051	167.433	203.273	230.188	326.952	629.059	988.891	1204.6	1354.48
519	16875.1	16782.8	20141.4	22629.6	31803.5	61389.6	96778.2	117772	132487												519	168.751	167.828	201.414	226.296	318.035	613.896	967.782	1177.72	1324.87
520	16554.1	16617.6	19733.6	22315	31379.6	59758.6	95115.6	114896	129550												520	165.541	166.176	197.336	223.15	313.796	597.586	951.156	1148.96	1295.5
521	16305.4	16004.6	19466.4	21631.5	30475.9	58803	91279.2	112147	125684												521	163.054	160.046	194.664	216.315	304.759	588.03	912.793	1121.47	1256.84
522	15845.6	15799.1	19181.5	21110.8	30000	56667.8	89303.1	109249	122894												522	158.456	157.991	191.815	211.108	300	566.678	893.031	1092.49	1228.94
523	15842.4	15709.1	18410	20890.8	29413.9	55583.8	86703.9	107163	119006												523	158.424	157.091	184.1	208.908	294.139	555.838	867.039	1071.63	1190.06
524	15789.1	15271.3	18546.8	20398.7	28505.2	54227.3	85144.4	103376	116687												524	157.891	152.713	185.468	203.987	285.052	542.273	851.444	1033.76	1166.87
525	15231.4	15042.6	17834.4	20090.4	27842.6	52999.6	82831.1	100952	114093												525	152.314	150.426	178.344	200.904	278.426	529.996	828.311	1009.52	1140.93
526	14743.8	14845.1	17908.8	19934.8	27266.9	51283.5	81294.4	98585.9	111538												526	147.438	148.451	179.088	199.348	272.669	512.835	812.944	985.859	1115.38
527	14907.5	14620.6	17455.8	19647.4	27180.1	50194.1	79943.8	97503.1	108534												527	149.075	146.206	174.558	196.474	271.801	501.941	799.438	975.031	1085.34
528	14838.4	14432.1	17556.6	19178.3	26109.8	49118.9	77847.4	93872.8	106649												528	148.384	144.321	175.566	191.783	261.098	491.189	778.474	938.728	1066.49
529	14546.3	14592.4	17045.8	19285.8	25901.4	48274.3	75996.1	92233.9	103608												529	145.463	145.924	170.458	192.858	259.014	482.743	759.961	922.339	1036.08
530	14365.4	14489.3	17076.6	18483.9	25303.7	47076.2	73876.7	90503	101379												530	143.654	144.893	170.766	184.839	253.037	470.762	738.767	905.03	1013.79
531	14330.8	14313.5	16539.4	18372.3	25041.9	46444.5	72481.8	87210.1	98941.4												531	143.308	143.135	165.394	183.723	250.419	464.445	724.818	872.101	989.414
532	13975.1	13497.2	16216.6	17755.6	24664.3	44907.7	69174.3	85619.5	96331.2												532	139.751	134.972	162.166	177.556	246.643	449.077	691.743	856.195	963.312
533	13426.8	13602.1	15651.9	17360	23149.2	43751.9	67819.1	82400.5	93335.2												533	134.268	136.021	156.519	173.6	231.492	437.519	678.191	824.005	933.352
534	12721.4	12844.5	15155.3	16786.9	22370.4	42639.4	65625.5	80700.3	90640.5												534	127.214	128.445	151.553	167.869	223.704	426.394	656.255	807.003	906.405
535	12788	12349	14746.2	16226.5	22174.6	41670.6	64439.5	78974.4	88525.8												535	127.88	123.49	147.462	162.265	221.746	416.706	644.395	789.744	885.258
536	12476.3	12094.5	14417.8	16160.8	21783.9	39876.4	62880	76190	86036.7												536	124.763	120.945	144.178	161.608	217.839	398.764	628.8	761.9	860.367
537	12376.1	12018.3	13964	15676.4	21138.4	39447.6	61399.4	74081.4	83902.8												537	123.761	120.183	139.64	156.764	211.384	394.476	613.994	740.814	839.028
538	12037.7	12260.7	14071.5	15353.7	20662.7	38031.9	59354.9	72571.9	82391												538	120.377	122.607	140.715	153.537	206.627	380.319	593.549	725.719	823.91
539	11800.4	11547.1	13538	14517.1	20336.9	37082.6	57924.7	70547.9	79283.9												539	118.004	115.471	135.38	145.171	203.369	370.826	579.247	705.479	792.839
540	11588.8	11424.3	13469.4	14452.6	20072	36569.2	56830.1	68365.7	77938.8												540	115.888	114.243	134.694	144.526	200.72	365.692	568.301	683.657	779.388
541	11206.3	11133.8	13208.3	14192.7	18888.5	35295.5	55158.2	66420.5	76056.8												541	112.063	111.338	132.083	141.927	188.885	352.955	551.582	664.205	760.568
542	11255.9	10990.8	12856.9	13756.5	18571.1	34170.6	53230.3	65227.8	73862.6												542	112.559	109.908	128.569	137.565	185.711	341.706	532.303	652.278	738.626
543	10758.9	10881.9	12815.8	13461.5	18110.5	33472.1	52835.3	63449.7	71653.8												543	107.589	108.819	128.158	134.615	181.105	334.721	528.353	634.497	716.538
544	10720.6	10374.5	12351.5	13321.3	18400.2	33129.3	51131.6	61703.6	69616.4												544	107.206	103.745	123.515	133.213	184.002	331.293	511.316	617.036	696.164
545	10509	10309.3	12012	13071.1	17573.4	32082.7	48974.7	60323.3	67931.1												545	105.09	103.093	120.12	130.711	175.734	320.827	489.747	603.233	679.311
546	10360.8	10511.6	12093.4	13338.9	17058.6	31458.1	48354	58909.4	66575.1												546	103.608	105.116	120.934	133.389	170.586	314.581	483.54	589.094	665.751
547	9986.72	9999.57	11601.7	12474.1	16590.4	30186	47397.5	57426.3	64827.4												547	99.8672	99.9957	116.017	124.741	165.904	301.86	473.975	574.263	648.274
548	10067.3	9890.38	11492.5	12059	16253.3	29692.9	45927.1	56067.8	63078.9												548	100.673	98.9038	114.925	120.59	162.533	296.929	459.271	560.678	630.789
549	9619.36	9518.5	11135.9	12072.3	16007.4	29402.3	45088.9	54769.8	61835												549	96.1936	95.185	111.359	120.723	160.074	294.023	450.889	547.698	618.35
550	9364.2	9565.5	10906.9	11563.1	15804.9	28074.7	43168	53415.5	59922.4												550	93.642	95.655	109.069	115.631	158.049	280.747	431.68	534.155	599.224
551	9468.58	9383.74	10854.8	11416.9	15204.4	27219.2	42313.4	52347.9	58218.4												551	94.6858	93.8374	108.548	114.169	152.044	272.192	423.134	523.479	582.184
552	9104.86	8824.17	10636.7	11361.8	14818.2	27041.6	41110.6	50577	57058.8												552	91.0486	88.2417	106.367	113.618	148.182	270.416	411.106	505.77	570.588
553	9064.42	8777.98	10420.6	10887.9	14315.4	26288.6	40541.5	49138.8	55797.8												553	90.6442	87.7798	104.206	108.879	143.154	262.886	405.415	491.388	557.978
554	8668.95	8616.89	10057.2	10593.9	13941.2	25702.4	39631.2	47778.5	53720.6												554	86.6895	86.1689	100.572	105.939	139.412	257.024	396.312	477.785	537.206
555	8791.9	8600.34	10001.5	10624.2	14003.6	25441.7	38770.3	46995.2	52298.8												555	87.919	86.0034	100.015	106.242	140.036	254.417	387.703	469.952	522.988
556	8596.98	8475.45	9771.74	10416.4	13531.4	23920.5	37281.5	45341.2	51506.4												556	85.9698	84.7545	97.7174	104.164	135.314	239.205	372.815	453.412	515.064
557	8319.69	8344.26	9873.92	10362.3	13363.9	23884.4	36487.4	44822.8	50145.6												557	83.1969	83.4426	98.7392	103.623	133.639	238.844	364.874	448.228	501.456
558	8481.7	7646.5	9225.65	9847.76	13033.8	22622.1	35786.1	42661.7	48548.5												558	84.817	76.465	92.2565	98.4776	130.338	226.221	357.861	426.617	485.485
559	7946.53	7979.83	9050.48	9747.48	12777.8	22201.3	34629.3	42228.7	47784.9												559	79.4653	79.7983	90.5048	97.4748	127.778	222.013	346.293	422.287	477.849
560	8098.35	7668.53	8906.42	9412.56	12368.3	22211.7	33539.1	40740.7	46507.6												560	80.9835	76.6853	89.0642	94.1256	123.683	222.117	335.391	407.407	465.076
561	7924.94	7620.34	8816.84	9516.12	12224.8	21273.5	32819.2	39446.7	45454.7												561	79.2494	76.2034	88.1684	95.1612	122.248	212.735	328.192	394.467	454.547
562	7687.7	7514.21	8797.38	9054.05	11792.6	21124.5	31983.3	38585.7	43594.9												562	76.877	75.1421	87.9738	90.5405	117.926	211.245	319.833	385.857	435.949
563	7741.17	7654.93	8510.17	9291.26	11731.6	20468.3	31539.3	37798.3	43035												563	77.4117	76.5493	85.1017	92.9126	117.316	204.683	315.393	377.983	430.35
564	7773.55	7334.44	8589.21	8917.85	11544.8	20033	30677.8	37035	42265.6												564	77.7355	73.3444	85.8921	89.1785	115.448	200.33	306.778	370.35	422.656
565	7891.27	7815.26	8470.24	9302.12	11834.7	20383.1	30494	36838.4	41748												565	78.9127	78.1526	84.7024	93.0212	118.347	203.831	304.94	368.384	417.48
566	7912.02	7862.08	8621.95	9209.52	11532.4	19676.7	29851.6	36037.1	40297.9												566	79.1202	78.6208	86.2195	92.0952	115.324	196.767	298.516	360.371	402.979
567	7998.73	7741.15	8559.27	8862.66	11368.2	19408.8	28980.5	35087.5	39935.1												567	79.9873	77.4115	85.5927	88.6266	113.682	194.088	289.805	350.875	399.351
568	7693.02	7339.92	8547.3	8668.55	10989.3	18558	28442	33933.4	38854.2												568	76.9302	73.3992	85.473	86.6855	109.893	185.58	284.42	339.334	388.542
569	7212.92	7190.66	8129.13	8434.74	10890.5	18148.2	27207.3	32935.7	37798.2												569	72.1292	71.9066	81.2913	84.3474	108.905	181.482	272.073	329.357	377.982
570	6862.98	6702.73	7664.67	7819.97	10298.9	17459.2	26520.6	31767	36366.2												570	68.6298	67.0273	76.6467	78.1997	102.989	174.592	265.206	317.67	363.662
571	6623.67	6515.84	7499.27	7710.91	9667.68	16707.2	25166.7	31071.7	35254.3												571	66.2367	65.1584	74.9927	77.1091	96.6768	167.072	251.667	310.717	352.543
572	6256.22	6016.7	7253.56	7371.02	9488.64	16508.7	25075.9	29757.3	33755.4												572	62.5622	60.167	72.5356	73.7102	94.8864	165.087	250.759	297.573	337.554
573	6175.37	5912.63	6921.6	7320.24	9189.06	15948.1	23949	29247.5	32943.8												573	61.7537	59.1263	69.216	73.2024	91.8906	159.481	239.49	292.475	329.438
574	5900.33	5595.03	6580.73	6934.83	8760.3	15298.2	23816.1	28781.7	32550.5												574	59.0033	55.9503	65.8073	69.3483	87.603	152.982	238.161	287.817	325.505
575	5868.37	5673.62	6378.58	7002.12	8851.85	15274.2	22976.6	27653	31666.6												575	58.6837	56.7362	63.7858	70.0212	88.5185	152.742	229.766	276.53	316.666
576	5843.55	5703.36	6475.97	6928.03	8409.3	14919.5	22750	26601	31126.6												576	58.4355	57.0336	64.7597	69.2803	84.093	149.195	227.5	266.01	311.266
577	5678.31	5535.28	6388.16	6607.39	8261.75	14501.9	21773	26815.1	29691.2												577	56.7831	55.3528	63.8816	66.0739	82.6175	145.019	217.73	268.151	296.912
578	5326.45	5351.3	6260.79	6609.64	8026.14	13798.2	21379.9	25702.2	29696.4												578	53.2645	53.513	62.6079	66.0964	80.2614	137.982	213.799	257.022	296.964
579	5287.57	5284.24	6464.07	6182.16	7772.35	13702.5	21126.7	25574.8	28731.9												579	52.8757	52.8424	64.6407	61.8216	77.7235	137.025	211.267	255.748	287.319
580	5481.01	5290.4	6018.85	6385.11	7740.7	13432.8	20508.2	24195.3	27745.3												580	54.8101	52.904	60.1885	63.8511	77.407	134.328	205.082	241.953	277.453
581	5204.25	4959.29	5954.2	6080.46	7591.66	13261.1	19775	24105.8	27162												581	52.0425	49.5929	59.542	60.8046	75.9166	132.611	197.75	241.058	271.62
582	5192.28	5119.81	5749.58	5941.42	7579.63	12580.4	19416.4	23375.1	26366.9												582	51.9228	51.1981	57.4958	59.4142	75.7963	125.804	194.164	233.751	263.669
583	5281.62	4835.48	5691.52	5795.78	7147.8	12683.1	19042.4	22785.8	25631.2												583	52.8162	48.3548	56.9152	57.9578	71.478	126.831	190.424	227.858	256.312
584	5087.32	5052.37	5524.94	5622.53	7087.57	12149.6	18662.1	21889.3	25086.8												584	50.8732	50.5237	55.2494	56.2253	70.8757	121.496	186.621	218.893	250.868
585	5015.48	4697.21	5637.89	5563.65	6923.52	11896.4	17694	21480.2	24535.9												585	50.1548	46.9721	56.3789	55.6365	69.2352	118.964	176.94	214.802	245.359
586	4930.1	4664.96	5330.71	5599.34	6795.59	11577.6	17532	21488.1	24327.4												586	49.301	46.6496	53.3071	55.9934	67.9559	115.776	175.32	214.881	243.274
587	4872.38	4248.78	5277.32	5535.37	6702.63	11465.4	17265.8	20441.3	22803.1												587	48.7238	42.4878	52.7732	55.3537	67.0263	114.654	172.658	204.413	228.031
588	4553.01	4684.31	5171.84	5402.99	6638.39	11387.9	17014.8	20181.4	22882.5												588	45.5301	46.8431	51.7184	54.0299	66.3839	113.879	170.148	201.814	228.825
589	4613.96	4363.95	4855.94	4988.65	6481.8	10833	16445.8	19374	22179.1												589	46.1396	43.6395	48.5594	49.8865	64.818	108.33	164.458	193.74	221.791
590	4493.1	4323.89	4856.77	5084.15	6059.44	10759.1	15935	19341.7	22120.4												590	44.931	43.2389	48.5677	50.8415	60.5944	107.591	159.35	193.417	221.204
591	4400.41	4164.49	5077.4	4890.7	6157.81	10637.9	15278.5	18708.6	21221												591	44.0041	41.6449	50.774	48.907	61.5781	106.379	152.785	187.086	212.21
592	4373.19	3973.09	4732.24	4746.69	6390.28	10128.9	14877.5	18053.7	20764.7												592	43.7319	39.7309	47.3224	47.4669	63.9028	101.289	148.775	180.537	207.647
593	4238.8	4159.9	4770.36	4776.56	5905.64	10175	15070.2	18307.3	19876.6												593	42.388	41.599	47.7036	47.7656	59.0564	101.75	150.702	183.073	198.766
594	4087.86	4089.5	4523.52	4720.81	5733.35	9450.78	14525.7	17066.7	19905.1												594	40.8786	40.895	45.2352	47.2081	57.3335	94.5078	145.257	170.667	199.051
595	4101.99	3899.95	4492.32	4761.46	5711.17	9264.03	13977.1	17369.4	18736.9												595	41.0199	38.9995	44.9232	47.6146	57.1117	92.6403	139.771	173.694	187.369
596	3928.39	3878.69	4336.55	4610.63	5672.94	9422.42	13852.1	16175	18455.9												596	39.2839	38.7869	43.3655	46.1063	56.7294	94.2242	138.521	161.75	184.559
597	3895.11	3769.64	4383.45	4429.07	5435.37	8818.3	13325.7	15989.6	18489												597	38.9511	37.6964	43.8345	44.2907	54.3537	88.183	133.257	159.896	184.89
598	3784.76	3661.76	4254.43	4350.21	5382.99	8809.84	12875.7	15562.1	18048.6												598	37.8476	36.6176	42.5443	43.5021	53.8299	88.0984	128.757	155.621	180.486
599	3705.03	3706.21	4190.43	4294.25	5254.6	8604.94	12495.2	14699	17311.6												599	37.0503	37.0621	41.9043	42.9425	52.546	86.0494	124.952	146.99	173.116
600	3565.99	3488.35	3964.39	4093.72	4762.26	8466.05	12605.5	15079.2	16947.8												600	35.6599	34.8835	39.6439	40.9372	47.6226	84.6605	126.055	150.792	169.478
601	4040.94	3762.27	3905.03	4100.91	4929.93	8285.49	12215.5	14408.7	16623.3												601	40.4094	37.6227	39.0503	41.0091	49.2993	82.8549	122.155	144.087	166.233
602	3504.11	3504.66	3928.11	4083.32	4796.51	8500.69	11597.5	14384.3	15994.3												602	35.0411	35.0466	39.2811	40.8332	47.9651	85.0069	115.975	143.843	159.943
603	3465.8	3611.36	3980.89	3988.05	4690.62	7842.21	11627.4	13795.9	15535.9												603	34.658	36.1136	39.8089	39.8805	46.9062	78.4221	116.274	137.959	155.359
604	3506.15	3446.2	3920.77	3963.45	4661.68	7712.95	11202.5	13291.3	15198.6												604	35.0615	34.462	39.2077	39.6345	46.6168	77.1295	112.025	132.913	151.986
605	3376.6	3500.31	3672.35	3711.19	4428.35	7793.04	11223.5	13165.8	15254.6												605	33.766	35.0031	36.7235	37.1119	44.2835	77.9304	112.235	131.658	152.546
606	3675.6	3401.13	3620.76	3663.13	4568.56	7513.16	10693.2	12910.6	15047.1												606	36.756	34.0113	36.2076	36.6313	45.6856	75.1316	106.932	129.106	150.471
607	3303.05	3285.68	3646.78	3706.8	4340.71	7083.44	10432.6	12585.9	14575.9												607	33.0305	32.8568	36.4678	37.068	43.4071	70.8344	104.326	125.859	145.759
608	3257.2	3154.58	3627.55	3579.21	4130.26	6775.19	10091	12358.9	13920.4												608	32.572	31.5458	36.2755	35.7921	41.3026	67.7519	100.91	123.589	139.204
609	3239.04	2963.37	3473.2	3521.88	4298.09	6694.78	9996.71	12040.2	13378.6												609	32.3904	29.6337	34.732	35.2188	42.9809	66.9478	99.9671	120.402	133.786
610	3295.21	3152.78	3397.48	3495.46	4078.06	6660.21	9959.92	11717.3	13380.6												610	32.9521	31.5278	33.9748	34.9546	40.7806	66.6021	99.5992	117.173	133.806
611	2914.67	2999.58	3249.97	3369.22	4129.44	6393.84	9599.77	11724.7	13007.9												611	29.1467	29.9958	32.4997	33.6922	41.2944	63.9384	95.9977	117.247	130.079
612	3093.15	2911.66	3353.49	3462.28	4184.82	6624.25	9782.47	10956	12630.3												612	30.9315	29.1166	33.5349	34.6228	41.8482	66.2425	97.8247	109.56	126.303
613	3015.68	2937.19	3377.28	3419.04	3939.94	6294.96	9105.02	11413.5	12606												613	30.1568	29.3719	33.7728	34.1904	39.3994	62.9496	91.0502	114.135	126.06
614	3156.46	3027.81	3361.65	3397.7	3922.24	6242.53	9213.4	10513.1	12506.5												614	31.5646	30.2781	33.6165	33.977	39.2224	62.4253	92.134	105.131	125.065
615	3007.18	2874.68	3309.04	3272.65	4060.43	6090.69	9001.38	10863	12264.6												615	30.0718	28.7468	33.0904	32.7265	40.6043	60.9069	90.0138	108.63	122.646
616	3152.61	3007.04	3122.07	3104.99	3927.02	6038.99	8669.62	10189.9	11839.9												616	31.5261	30.0704	31.2207	31.0499	39.2702	60.3899	86.6962	101.899	118.399
617	2936.76	2960.34	3080.11	3360.74	3672.45	6168.65	8763.34	10294.8	11589.1												617	29.3676	29.6034	30.8011	33.6074	36.7245	61.6865	87.6334	102.948	115.891
618	3041.27	2940.99	3050.3	3176.37	3780.59	5854.12	8483.59	10247	11415.3												618	30.4127	29.4099	30.503	31.7637	37.8059	58.5412	84.8359	102.47	114.153
619	2731.22	2889.71	3062.18	3185.08	3622.25	5697.88	8349.24	9869.41	10999												619	27.3122	28.8971	30.6218	31.8508	36.2225	56.9788	83.4924	98.6941	109.99
620	2636.96	2741.75	2996.93	3110.07	3554.56	5527.91	8030.75	9378.97	10791.2												620	26.3696	27.4175	29.9693	31.1007	35.5456	55.2791	80.3075	93.7897	107.912
621	2969.76	2483.8	2840.46	2876.56	3565.45	5562.74	8308.22	9490.18	10904.9												621	29.6976	24.838	28.4046	28.7656	35.6545	55.6274	83.0822	94.9018	109.049
622	2547.97	2501.41	2704.92	2926.81	3568.67	5371.24	8033.22	9185.6	10158.8												622	25.4797	25.0141	27.0492	29.2681	35.6867	53.7124	80.3322	91.856	101.588
623	2669.78	2625.85	2992.17	2882.02	3379.6	5163.61	7365.53	8789.8	10051.6												623	26.6978	26.2585	29.9217	28.8202	33.796	51.6361	73.6553	87.898	100.516
624	2600.04	2525.46	2879.25	2720.69	3210.56	4991.18	6995.38	8582.74	9701.49												624	26.0004	25.2546	28.7925	27.2069	32.1056	49.9118	69.9538	85.8274	97.0149
625	2370.23	2416.63	2713.94	2590.46	3217.35	4917.18	6897.1	8307.22	9423.88												625	23.7023	24.1663	27.1394	25.9046	32.1735	49.1718	68.971	83.0722	94.2388
626	2255.39	2349.08	2673.18	2648.78	3265.49	4789.95	6625.35	8387.46	9343.5												626	22.5539	23.4908	26.7318	26.4878	32.6549	47.8995	66.2535	83.8746	93.435
627	2474.27	2265.48	2545.01	2578.33	3039.25	4390.84	6801.15	8069.39	9094.1												627	24.7427	22.6548	25.4501	25.7833	30.3925	43.9084	68.0115	80.6939	90.941
628	2411.79	2407.06	2739.62	2505.66	2911.87	4543.69	6821.18	8037.56	8954												628	24.1179	24.0706	27.3962	25.0566	29.1187	45.4369	68.2118	80.3756	89.54
629	2435.76	2358.95	2366.57	2484.55	2889.24	4504.23	6410.21	7533.78	8674.84												629	24.3576	23.5895	23.6657	24.8455	28.8924	45.0423	64.1021	75.3378	86.7484
630	2567.12	2218.14	2496.29	2459.45	3079.14	4333.93	6343.56	7459.1	8707.88												630	25.6712	22.1814	24.9629	24.5945	30.7914	43.3393	63.4356	74.591	87.0787
631	2202.24	2342.6	2526.28	2557.2	2754.82	4603.32	6155.73	7369.73	8220.5												631	22.0224	23.426	25.2628	25.572	27.5482	46.0332	61.5573	73.6973	82.205
632	2542.04	2242.19	2412.33	2587.11	2959.16	4391.44	6082.82	7313.19	8542.92												632	25.4204	22.4219	24.1233	25.8711	29.5916	43.9144	60.8282	73.1319	85.4292
633	2569.92	2294.19	2550.62	2379.69	2665.05	4279.21	6238.63	7032.42	8065.92												633	25.6992	22.9419	25.5062	23.7969	26.6505	42.7921	62.3863	70.3242	80.6592
634	2369.05	2122.79	2479.87	2417.18	2694.34	4152.21	5912.57	6628.95	7628.43												634	23.6905	21.2279	24.7987	24.1718	26.9434	41.5221	59.1257	66.2895	76.2843
635	2158.18	2108.49	2408.07	2393.27	2626.64	3980.13	6047.58	6790.97	7995.81												635	21.5818	21.0849	24.0807	23.9327	26.2664	39.8013	60.4758	67.9097	79.9581
636	2177.42	2185.55	2304.63	2423.97	2486.14	4013.14	5660.13	6681.14	7129.43												636	21.7742	21.8555	23.0463	24.2397	24.8614	40.1314	56.6013	66.8114	71.2943
637	2083.97	2039.97	2369.42	2283.23	2488.49	3853.74	5726.24	6785.94	7443.32												637	20.8397	20.3997	23.6942	22.8323	24.8849	38.5374	57.2624	67.8594	74.4332
638	2109.96	2005.98	2291.94	2216.96	2763.46	3908.43	5651.78	6540.62	7526.45												638	21.0996	20.0598	22.9194	22.1696	27.6346	39.0843	56.5178	65.4062	75.2645
639	2080.96	2151.97	2184.82	2307.11	2346.16	3822.74	5154.11	6067.24	7005.1												639	20.8096	21.5197	21.8482	23.0711	23.4616	38.2274	51.5411	60.6724	70.051
640	2324.1	2053.47	2120.1	2092.82	2572.21	3837.98	5189.69	6083.33	7309.09												640	23.241	20.5347	21.201	20.9282	25.7221	38.3798	51.8969	60.8333	73.0909
641	2078.66	2191.39	2200.44	2227.75	2460.59	3763.43	5198.51	6539.57	6980.91												641	20.7866	21.9139	22.0044	22.2775	24.6059	37.6343	51.9851	65.3957	69.8091
642	2251.93	2118.49	2201.63	2276.91	2747.76	3819.75	5202.87	6154.66	6881.64												642	22.5193	21.1849	22.0163	22.7691	27.4776	38.1975	52.0287	61.5466	68.8164
643	2319.84	2561.14	2333.36	2340.89	2543.48	3883.12	5048.59	6182.14	6843.28												643	23.1984	25.6114	23.3336	23.4089	25.4348	38.8312	50.4859	61.8214	68.4328
644	2654.59	2553.5	2800.87	2603.94	2868.67	4370.56	5179	6615.04	7360.32												644	26.5459	25.535	28.0087	26.0394	28.6867	43.7056	51.79	66.1504	73.6032
645	3102.61	3362.61	3186.27	3195.96	3657.93	4405.71	5699.59	7086.12	7970.9												645	31.0261	33.6261	31.8627	31.9596	36.5793	44.0571	56.9959	70.8612	79.709
646	3763.26	4041.12	3903.5	4011.14	4169.81	5236.91	6677.16	7860.14	8993.2												646	37.6326	40.4112	39.035	40.1114	41.6981	52.3691	66.7716	78.6014	89.932
647	5020.42	4981.75	4784.39	4789.67	4702.8	6128.12	7608	8466.34	10339												647	50.2042	49.8175	47.8439	47.8967	47.028	61.2812	76.08	84.6634	103.39
648	5829.94	5742.06	5592.44	5091.33	4975.09	6422.12	8215.48	9418.38	11196.4												648	58.2994	57.4206	55.9244	50.9133	49.7509	64.2212	82.1548	94.1838	111.964
649	6258.78	5730.63	5717.61	5902.34	5496.19	7032.94	8306.58	9464.88	11604.4												649	62.5878	57.3063	57.1761	59.0234	54.9619	70.3294	83.0658	94.6488	116.044
650	5583.03	5715.68	5271.29	5640.93	5533.4	6946.89	8257.72	8663.17	11522.2												650	55.8303	57.1568	52.7129	56.4093	55.334	69.4689	82.5772	86.6317	115.222
651	5202.66	5071.62	4980.68	5030.46	5078.54	6014.13	7269.25	8707.01	10090.9												651	52.0266	50.7162	49.8068	50.3046	50.7854	60.1413	72.6925	87.0701	100.909
652	4252.92	4227.05	4259.01	4102.25	3971.86	5127.56	6830.91	7475.83	9062.9												652	42.5292	42.2705	42.5901	41.0225	39.7186	51.2756	68.3091	74.7583	90.629
653	3435.05	2901.74	3365.32	3141.37	3559.37	4577.87	6023.68	6553.18	7811.49												653	34.3505	29.0174	33.6532	31.4137	35.5937	45.7787	60.2368	65.5318	78.1149
654	2684.05	2532.66	2679.55	2742.63	2856.57	3607.33	4686.83	5785.22	6610.1												654	26.8405	25.3266	26.7955	27.4263	28.5657	36.0733	46.8683	57.8522	66.101
655	2069.53	2030.34	2203.74	2471.8	2229.49	3389.74	4514.36	5282.66	6046.56												655	20.6953	20.3034	22.0374	24.718	22.2949	33.8974	45.1436	52.8266	60.4656
656	2015.02	1914.23	1961.34	1991.19	2232.52	3214	4098.32	4901.65	5444.96												656	20.1502	19.1423	19.6134	19.9119	22.3252	32.14	40.9832	49.0165	54.4496
657	2294.06	2042.38	1853.12	1853.59	2073.39	3088.62	4012.13	4619.69	5435.3												657	22.9406	20.4238	18.5312	18.5359	20.7339	30.8862	40.1213	46.1969	54.353
658	1861.6	1736.85	1987.56	2141.7	2186.95	2968.61	4259.49	4896.71	5475.06												658	18.616	17.3685	19.8756	21.417	21.8695	29.6861	42.5949	48.9671	54.7506
659	2233.4	1689.19	1994.31	1996.4	2175.75	2838.06	4252.81	4696.61	5308.58												659	22.334	16.8919	19.9431	19.964	21.7575	28.3806	42.5281	46.9661	53.0858
660	2045.22	1839.51	1883.69	1938.77	2138.15	2612.53	3992.09	4731.39	5166.97												660	20.4522	18.3951	18.8369	19.3877	21.3815	26.1253	39.9209	47.3139	51.6697
661	2009.6	1817.14	1850.91	2053.31	2149.59	3057.46	4019.55	4490.47	5149.85												661	20.096	18.1714	18.5091	20.5331	21.4959	30.5746	40.1955	44.9047	51.4985
662	2107.92	1661.01	1943.88	1945.07	2090.03	2652.76	3793.72	4570.52	5151.44												662	21.0792	16.6101	19.4388	19.4507	20.9003	26.5276	37.9372	45.7052	51.5144
663	1949.89	2208.42	1907.86	2007.75	2176.26	2933.4	4051.98	4569.61	4953.51												663	19.4989	22.0842	19.0786	20.0775	21.7626	29.334	40.5198	45.6961	49.5351
664	1792.91	1883.72	2114.13	1825.31	1848.2	2625.02	3641.65	4368.77	4531.05												664	17.9291	18.8372	21.1413	18.2531	18.482	26.2502	36.4165	43.6877	45.3105
665	1897.86	1934.96	2011.21	1818.15	2279.42	2865.21	3753.47	4461.41	4887.17												665	18.9786	19.3496	20.1121	18.1815	22.7942	28.6521	37.5347	44.6141	48.8717
666	1931.76	1952.6	1824.74	2001.55	2054.16	3095.46	3690.08	4356.07	5013.27												666	19.3176	19.526	18.2474	20.0155	20.5416	30.9546	36.9008	43.5607	50.1327
667	1733.64	1890.07	1735.59	1822.04	1945.63	2896.84	3642.21	4032.69	5059.82												667	17.3364	18.9007	17.3559	18.2204	19.4563	28.9684	36.4221	40.3269	50.5982
668	2041.63	1947.77	1855.98	2026.88	1927.74	2619.32	3513.46	4289.2	5004.65												668	20.4163	19.4777	18.5598	20.2688	19.2774	26.1932	35.1346	42.892	50.0465
669	2055.87	1901.74	2210.58	2077.93	1953.06	2694.18	3597.82	3866.4	4842.54												669	20.5587	19.0174	22.1058	20.7793	19.5306	26.9418	35.9782	38.664	48.4254
670	2176.79	2049.8	2102.45	1985.53	2178.75	2959.48	3824.25	4136.32	4895.26												670	21.7679	20.498	21.0245	19.8553	21.7875	29.5948	38.2425	41.3632	48.9526
671	1991.23	1831.43	2045.06	1931.39	2219.24	2666.25	3346.53	4284.3	4933.54												671	19.9123	18.3143	20.4506	19.3139	22.1924	26.6625	33.4653	42.843	49.3354
672	1860.51	2086.39	2072.56	1923.83	2129.95	2738.22	3691.63	4041.94	4930.28												672	18.6051	20.8639	20.7256	19.2383	21.2995	27.3822	36.9163	40.4194	49.3028
673	1726.81	1701.71	1713.87	1666.03	1874.83	2643.49	3652.53	4142.01	4590.48												673	17.2681	17.0171	17.1387	16.6603	18.7483	26.4349	36.5253	41.4201	45.9048
674	1830.83	2244.61	1932.27	2267.18	2099.19	2627.52	3485.04	3919.5	4855.58												674	18.3083	22.4461	19.3227	22.6718	20.9919	26.2752	34.8504	39.195	48.5558
675	1879.62	2242.3	2008.77	2375.56	2087.08	2648.5	3322.02	3881.41	4830.84												675	18.7962	22.423	20.0877	23.7556	20.8708	26.485	33.2202	38.8141	48.3084
676	2107.63	2207.36	1995.74	2021.45	2113.7	2780.7	3337.09	4413.8	4486.11												676	21.0763	22.0736	19.9574	20.2145	21.137	27.807	33.3709	44.138	44.8611
677	2264.16	2255.89	2062.09	2180.07	2022.68	2798.48	3282.37	3835.81	4694.27												677	22.6416	22.5589	20.6209	21.8007	20.2268	27.9848	32.8237	38.3581	46.9427
678	2250.88	2129.12	2211.58	2236.81	2091.11	2861.87	3539.66	3880.2	4564.13												678	22.5088	21.2912	22.1158	22.3681	20.9111	28.6187	35.3966	38.802	45.6413
679	2257.72	2275.03	2069.07	1869.52	2081.37	3142.87	3534.68	3790.5	4886.7												679	22.5772	22.7503	20.6907	18.6952	20.8137	31.4287	35.3468	37.905	48.867
680	582.94	635.805	768.427	815.581	854.161	1180.37	1647.05	1896.29	2241.56												680	5.8294	6.35805	7.68427	8.15581	8.54161	11.8037	16.4705	18.9629	22.4156
681	653.327	707.384	686.667	726.567	708.009	1217.44	1733.07	2020.48	2316.99												681	6.53327	7.07384	6.86667	7.26567	7.08009	12.1744	17.3307	20.2048	23.1699
682	620.107	660.192	645.265	706.75	875.914	1089.32	1844.06	1881.78	2393.35												682	6.20107	6.60192	6.45265	7.0675	8.75914	10.8932	18.4406	18.8178	23.9335
683	557.424	633.476	755.963	753.063	851.279	1126.89	1716.44	1879.07	2264.73												683	5.57424	6.33476	7.55963	7.53063	8.51279	11.2689	17.1644	18.7907	22.6473
684	572.557	664.276	737.676	600.905	774.111	799.549	1569.06	1854.31	2116.21												684	5.72557	6.64276	7.37676	6.00905	7.74111	7.99549	15.6906	18.5431	21.1621
685	588.292	629.699	764.097	609.781	831.053	1092.29	1544.59	1980.31	1972.76												685	5.88292	6.29699	7.64097	6.09781	8.31053	10.9229	15.4459	19.8031	19.7276
686	633.807	608.823	585.053	633.533	820.979	1098.52	1611.42	2052.67	2170.81												686	6.33807	6.08823	5.85053	6.33533	8.20979	10.9852	16.1142	20.5267	21.7081
687	680.128	586.422	669.762	703.846	676.782	902.903	1448.71	1667.99	1817.08												687	6.80128	5.86422	6.69762	7.03846	6.76782	9.02903	14.4871	16.6799	18.1708
688	620.841	571.609	632.465	627.732	630.554	1097.65	1492.29	1549.23	1761.84												688	6.20841	5.71609	6.32465	6.27732	6.30554	10.9765	14.9229	15.4923	17.6184
689	606.444	548.497	601.811	597.297	647.396	1177.92	1209.1	1506.62	1818.79												689	6.06444	5.48497	6.01811	5.97297	6.47396	11.7792	12.091	15.0662	18.1879
690	670.623	588.291	545.913	654.236	632.836	1056.89	1333.14	1788.89	2015.81												690	6.70623	5.88291	5.45913	6.54236	6.32836	10.5689	13.3314	17.8889	20.1581
691	488.274	685.459	708.795	541.06	781.992	1014.23	1484.26	1435.71	1657.05												691	4.88274	6.85459	7.08795	5.4106	7.81992	10.1423	14.8426	14.3571	16.5705
692	592.841	507.265	487.932	607.66	759.801	1087.86	1313.61	1733.13	1834.15												692	5.92841	5.07265	4.87932	6.0766	7.59801	10.8786	13.1361	17.3313	18.3415
693	676.002	456.765	545.693	650.749	525.516	841.345	1256.54	1436.32	1674.13												693	6.76002	4.56765	5.45693	6.50749	5.25516	8.41345	12.5654	14.3632	16.7413
694	501.795	387.8	451.186	557.553	628.011	1008.95	1430.45	1310.28	1681.36												694	5.01795	3.878	4.51186	5.57553	6.28011	10.0895	14.3045	13.1028	16.8136
695	559.928	461.965	638.582	582.966	610.809	997.635	1128.01	1451.57	1750.37												695	5.59928	4.61965	6.38582	5.82966	6.10809	9.97635	11.2801	14.5157	17.5037
696	559.598	495.078	481.552	635.392	681.458	790.034	1248.76	1420.55	1794.84												696	5.59598	4.95078	4.81552	6.35392	6.81458	7.90034	12.4876	14.2055	17.9484
697	576.499	528.671	648.563	528.02	664.266	837.874	1113.85	1522.27	1668.12												697	5.76499	5.28671	6.48563	5.2802	6.64266	8.37874	11.1385	15.2227	16.6812
698	593.758	571.571	523.016	608.225	728.517	859.674	1195.51	1334.86	1517.35												698	5.93758	5.71571	5.23016	6.08225	7.28517	8.59674	11.9551	13.3486	15.1735
699	521.636	525.605	641.167	479.088	656.254	760.901	1166.86	1484.43	1493.94												699	5.21636	5.25605	6.41167	4.79088	6.56254	7.60901	11.6686	14.8443	14.9394
700	428.922	349.401	446.282	523.51	535.023	799.933	1090.87	1261.05	1487.58												700	4.28922	3.49401	4.46282	5.2351	5.35023	7.99933	10.9087	12.6105	14.8758
