# Supplementary material for: Daptomycin forms a stable complex with phosphatidylglycerol for selective uptake to bacterial membrane
Source: eLife. 2025 Jun 2;13:RP93267. doi: 10.7554/eLife.93267 (PMC12129450; doi:10.7554/eLife.93267)
Supplement: Figure 2—figure supplement 3—source data 4. [file elife-93267-fig2-figsupp3-data4.xlsx]

## Sheet: Multi Scans EM
Wavelength(nm)	Control	0.65uM	1.30uM	2.60uM	5.20uM	10.41uM	20.83uM	41.66uM	83.33uM											Wavelength(nm)	Control	0.65uM	1.30uM	2.60uM	5.20uM	10.41uM	20.83uM	41.66uM	83.33uM
385	5170	4890	4880	4470	4530	4810	4510	6260	7170											385	51.7	48.9	48.8	44.7	45.3	48.1	45.1	62.6	71.7
386	4910	4480	4510	3920	4250	4410	4270	5930	6800											386	49.1	44.8	45.1	39.2	42.5	44.1	42.7	59.3	68
387	4610	4200	4210	3860	3960	4230	4140	5840	6840											387	46.1	42	42.1	38.6	39.6	42.3	41.4	58.4	68.4
388	4300	4030	4060	3610	3710	4060	4030	5830	6720											388	43	40.3	40.6	36.1	37.1	40.6	40.3	58.3	67.2
389	3920	3560	3800	3330	3430	3920	3810	5820	6990											389	39.2	35.6	38	33.3	34.3	39.2	38.1	58.2	69.9
390	3750	3490	3520	3320	3360	3880	3830	5940	7110											390	37.5	34.9	35.2	33.2	33.6	38.8	38.3	59.4	71.1
391	3540	3200	3280	3080	3280	3620	4030	6410	7570											391	35.4	32	32.8	30.8	32.8	36.2	40.3	64.1	75.7
392	3370	3060	3220	3030	3180	3700	4000	6510	8090											392	33.7	30.6	32.2	30.3	31.8	37	40	65.1	80.9
393	3210	2970	3060	2690	3090	3770	4180	7050	8870											393	32.1	29.7	30.6	26.9	30.9	37.7	41.8	70.5	88.7
394	3010	2810	2930	2760	3090	3840	4420	7720	9500											394	30.1	28.1	29.3	27.6	30.9	38.4	44.2	77.2	95
395	2950	2780	2840	2710	3020	4040	4900	8660	10900											395	29.5	27.8	28.4	27.1	30.2	40.4	49	86.6	109
396	2900	2750	2890	2790	3190	4220	5130	9750	11900											396	29	27.5	28.9	27.9	31.9	42.2	51.3	97.5	119
397	2910	2620	2870	2890	3200	4600	5760	10800	13600											397	29.1	26.2	28.7	28.9	32	46	57.6	108	136
398	2750	2550	2790	2820	3310	4800	6270	12200	15500											398	27.5	25.5	27.9	28.2	33.1	48	62.7	122	155
399	2750	2550	2690	2820	3370	5240	7060	13800	17500											399	27.5	25.5	26.9	28.2	33.7	52.4	70.6	138	175
400	2520	2440	2690	2840	3440	5550	7820	15800	20400											400	25.2	24.4	26.9	28.4	34.4	55.5	78.2	158	204
401	2550	2460	2730	2870	3720	6020	8540	17600	22900											401	25.5	24.6	27.3	28.7	37.2	60.2	85.4	176	229
402	2500	2420	2710	3070	3860	6440	9890	20400	25600											402	25	24.2	27.1	30.7	38.6	64.4	98.9	204	256
403	2490	2460	2730	3110	4060	7470	10900	22900	29100											403	24.9	24.6	27.3	31.1	40.6	74.7	109	229	291
404	2570	2490	2830	3300	4560	8160	12300	25400	33100											404	25.7	24.9	28.3	33	45.6	81.6	123	254	331
405	2610	2500	2920	3500	5020	9100	13800	28900	36800											405	26.1	25	29.2	35	50.2	91	138	289	368
406	2720	2580	3000	3770	5470	10100	15500	32000	41900											406	27.2	25.8	30	37.7	54.7	101	155	320	419
407	2780	2770	3320	4120	5790	10800	17000	34900	45500											407	27.8	27.7	33.2	41.2	57.9	108	170	349	455
408	3030	2890	3430	4280	6290	11900	18600	39700	51300											408	30.3	28.9	34.3	42.8	62.9	119	186	397	513
409	3200	3150	3690	4760	6970	13500	20800	43900	56500											409	32	31.5	36.9	47.6	69.7	135	208	439	565
410	3120	3100	3640	4760	7270	14600	22900	48500	62900											410	31.2	31	36.4	47.6	72.7	146	229	485	629
411	3340	3610	4050	5380	8350	15800	25700	53100	69000											411	33.4	36.1	40.5	53.8	83.5	158	257	531	690
412	4020	3930	4540	6080	9240	17300	27400	58400	75500											412	40.2	39.3	45.4	60.8	92.4	173	274	584	755
413	4480	4460	5130	6620	10100	19000	30200	63200	81700											413	44.8	44.6	51.3	66.2	101	190	302	632	817
414	5070	5010	5730	7470	11200	20200	32900	68600	88700											414	50.7	50.1	57.3	74.7	112	202	329	686	887
415	5630	5620	6260	8450	12300	22400	35600	73600	95000											415	56.3	56.2	62.6	84.5	123	224	356	736	950
416	6260	6110	6850	9150	13200	24200	38300	79200	102000											416	62.6	61.1	68.5	91.5	132	242	383	792	1020
417	6770	6450	7350	9830	14100	25700	40600	84600	109000											417	67.7	64.5	73.5	98.3	141	257	406	846	1090
418	7100	6720	7870	10400	15100	27100	43200	89700	115000											418	71	67.2	78.7	104	151	271	432	897	1150
419	7260	7090	8200	10700	15700	29000	45700	95200	122000											419	72.6	70.9	82	107	157	290	457	952	1220
420	7310	7120	8130	11200	16300	30300	48600	99600	129000											420	73.1	71.2	81.3	112	163	303	486	996	1290
421	7410	7210	8540	11400	17100	31400	50800	105000	135000											421	74.1	72.1	85.4	114	171	314	508	1050	1350
422	7490	7320	8520	11800	17600	32400	52600	110000	141000											422	74.9	73.2	85.2	118	176	324	526	1100	1410
423	7640	7470	8760	12100	18100	34000	55600	115000	147000											423	76.4	74.7	87.6	121	181	340	556	1150	1470
424	7750	7650	9130	12500	18800	35200	57900	119000	153000											424	77.5	76.5	91.3	125	188	352	579	1190	1530
425	8250	7950	9390	13200	19500	36700	59900	123000	159000											425	82.5	79.5	93.9	132	195	367	599	1230	1590
426	8770	8520	10000	13600	20700	38300	62800	128000	165000											426	87.7	85.2	100	136	207	383	628	1280	1650
427	9250	8990	10400	14300	21400	39700	65500	132000	170000											427	92.5	89.9	104	143	214	397	655	1320	1700
428	9720	9380	10800	14900	22400	40800	67500	137000	177000											428	97.2	93.8	108	149	224	408	675	1370	1770
429	10100	10100	11500	15600	23200	42700	69600	141000	182000											429	101	101	115	156	232	427	696	1410	1820
430	10700	10600	12100	16500	24400	43900	72000	145000	188000											430	107	106	121	165	244	439	720	1450	1880
431	11300	11100	12600	17200	25300	45300	74700	149000	194000											431	113	111	126	172	253	453	747	1490	1940
432	12100	11600	13300	17900	26100	46600	77100	153000	196000											432	121	116	133	179	261	466	771	1530	1960
433	12800	12200	13900	18700	27200	48300	78200	156000	202000											433	128	122	139	187	272	483	782	1560	2020
434	13100	12700	14400	19200	27900	49200	80400	159000	207000											434	131	127	144	192	279	492	804	1590	2070
435	13700	13500	14800	20100	28700	50500	82100	163000	210000											435	137	135	148	201	287	505	821	1630	2100
436	14100	14100	15200	20700	29500	51100	83500	165000	214000											436	141	141	152	207	295	511	835	1650	2140
437	15100	14200	16000	21200	30400	52300	85800	168000	216000											437	151	142	160	212	304	523	858	1680	2160
438	15700	14800	16700	22000	31200	52900	87800	170000	220000											438	157	148	167	220	312	529	878	1700	2200
439	16000	15300	17000	22700	32000	53900	88600	172000	223000											439	160	153	170	227	320	539	886	1720	2230
440	16700	15800	17400	23300	33000	56000	89700	174000	226000											440	167	158	174	233	330	560	897	1740	2260
441	17400	16600	18000	23700	33300	55300	90800	177000	228000											441	174	166	180	237	333	553	908	1770	2280
442	17900	16900	18500	24300	33800	56600	92600	177000	230000											442	179	169	185	243	338	566	926	1770	2300
443	18200	17400	18800	24900	34500	56800	93100	179000	230000											443	182	174	188	249	345	568	931	1790	2300
444	18600	18000	19500	25300	35100	57700	93800	180000	232000											444	186	180	195	253	351	577	938	1800	2320
445	19400	18500	20000	26000	35800	58800	95100	181000	233000											445	194	185	200	260	358	588	951	1810	2330
446	20100	19100	20800	26800	36500	58800	95700	182000	235000											446	201	191	208	268	365	588	957	1820	2350
447	21100	19600	21500	27200	36900	60000	96900	183000	237000											447	211	196	215	272	369	600	969	1830	2370
448	21500	20500	22000	27800	37800	60000	97000	184000	236000											448	215	205	220	278	378	600	970	1840	2360
449	21900	20700	22200	28200	38400	60800	97300	184000	238000											449	219	207	222	282	384	608	973	1840	2380
450	22100	20900	22100	28400	38000	60300	97200	184000	238000											450	221	209	221	284	380	603	972	1840	2380
451	22000	21000	22200	28300	38300	60100	98100	183000	237000											451	220	210	222	283	383	601	981	1830	2370
452	22300	21100	22200	28500	38500	60400	97500	184000	238000											452	223	211	222	285	385	604	975	1840	2380
453	22700	21300	22700	28600	38200	60300	97800	183000	236000											453	227	213	227	286	382	603	978	1830	2360
454	22600	21600	22700	28900	38700	60300	98200	182000	234000											454	226	216	227	289	387	603	982	1820	2340
455	23400	22100	22800	29400	39000	60000	97700	182000	235000											455	234	221	228	294	390	600	977	1820	2350
456	23600	22000	23200	29700	39000	60400	97600	181000	234000											456	236	220	232	297	390	604	976	1810	2340
457	23900	22400	23600	29800	39300	60700	96700	180000	232000											457	239	224	236	298	393	607	967	1800	2320
458	24300	22900	23700	30100	39400	59800	96800	178000	231000											458	243	229	237	301	394	598	968	1780	2310
459	24100	22900	24200	30000	39600	60300	96400	177000	229000											459	241	229	242	300	396	603	964	1770	2290
460	24700	23200	24300	30300	39100	60100	95800	176000	228000											460	247	232	243	303	391	601	958	1760	2280
461	24600	23600	24200	30500	39500	59800	96000	174000	226000											461	246	236	242	305	395	598	960	1740	2260
462	25100	23600	24200	30800	39700	58900	95000	173000	225000											462	251	236	242	308	397	589	950	1730	2250
463	25600	24000	24500	31100	39800	59100	94000	172000	223000											463	256	240	245	311	398	591	940	1720	2230
464	25600	23900	24400	30800	39600	58600	93600	170000	220000											464	256	239	244	308	396	586	936	1700	2200
465	25700	24300	24700	31000	39400	58700	92600	169000	219000											465	257	243	247	310	394	587	926	1690	2190
466	25700	24500	24900	30900	39300	57900	92500	167000	217000											466	257	245	249	309	393	579	925	1670	2170
467	25900	24500	25100	31100	39300	57400	91800	165000	215000											467	259	245	251	311	393	574	918	1650	2150
468	25700	24700	25000	31200	39300	56900	90400	163000	213000											468	257	247	250	312	393	569	904	1630	2130
469	26200	24400	25300	30900	39000	57000	89600	162000	210000											469	262	244	253	309	390	570	896	1620	2100
470	26000	24700	25100	30600	38700	56100	89200	159000	207000											470	260	247	251	306	387	561	892	1590	2070
471	25900	24700	25400	30900	38900	55300	87700	159000	204000											471	259	247	254	309	389	553	877	1590	2040
472	26100	24700	24900	30600	38400	54500	87400	156000	202000											472	261	247	249	306	384	545	874	1560	2020
473	26300	24500	25000	30400	38200	54800	85800	153000	199000											473	263	245	250	304	382	548	858	1530	1990
474	26300	24400	25400	30100	38100	53900	85000	152000	195000											474	263	244	254	301	381	539	850	1520	1950
475	25900	24300	24700	29800	37900	53300	83900	150000	194000											475	259	243	247	298	379	533	839	1500	1940
476	25700	24300	24400	30100	37400	52300	83100	146000	191000											476	257	243	244	301	374	523	831	1460	1910
477	26100	24600	24600	29200	37200	51700	82400	145000	188000											477	261	246	246	292	372	517	824	1450	1880
478	25900	24300	24500	29400	36500	51600	81600	143000	186000											478	259	243	245	294	365	516	816	1430	1860
479	25900	24200	24400	29400	36700	51000	80300	140000	183000											479	259	242	244	294	367	510	803	1400	1830
480	25900	24100	24200	29200	36200	49900	79100	138000	180000											480	259	241	242	292	362	499	791	1380	1800
481	25600	24200	24000	29200	35700	49600	77900	136000	178000											481	256	242	240	292	357	496	779	1360	1780
482	25400	23900	24000	28800	35600	48600	75800	134000	174000											482	254	239	240	288	356	486	758	1340	1740
483	25300	23900	23900	28600	35500	47500	75800	132000	171000											483	253	239	239	286	355	475	758	1320	1710
484	25200	23800	23700	28300	35000	47200	74600	129000	168000											484	252	238	237	283	350	472	746	1290	1680
485	25100	24000	23300	28200	34500	46200	73300	127000	166000											485	251	240	233	282	345	462	733	1270	1660
486	24900	23300	23200	28000	33900	46100	71200	124000	162000											486	249	233	232	280	339	461	712	1240	1620
487	24900	23200	23200	27200	33700	45200	70800	121000	159000											487	249	232	232	272	337	452	708	1210	1590
488	24500	23000	22600	27200	33100	44400	69500	120000	156000											488	245	230	226	272	331	444	695	1200	1560
489	24300	22600	22400	26700	32900	43800	68800	117000	153000											489	243	226	224	267	329	438	688	1170	1530
490	24100	22500	22500	26500	32100	42400	67100	115000	150000											490	241	225	225	265	321	424	671	1150	1500
491	23900	22800	22300	26500	31900	42600	65700	113000	147000											491	239	228	223	265	319	426	657	1130	1470
492	24000	22000	22100	26200	31700	41200	64000	111000	145000											492	240	220	221	262	317	412	640	1110	1450
493	23500	21900	21900	25800	30800	41000	63300	108000	142000											493	235	219	219	258	308	410	633	1080	1420
494	23300	21900	21800	25700	31000	40200	62200	106000	139000											494	233	219	218	257	310	402	622	1060	1390
495	23100	21700	21300	25400	29900	39500	61200	104000	137000											495	231	217	213	254	299	395	612	1040	1370
496	23100	21300	21100	25000	29900	38900	60400	102000	134000											496	231	213	211	250	299	389	604	1020	1340
497	22400	21200	20800	24600	29200	38000	58900	100000	130000											497	224	212	208	246	292	380	589	1000	1300
498	22300	20800	20500	24300	28700	37500	57900	97800	129000											498	223	208	205	243	287	375	579	978	1290
499	22100	21000	20400	24200	28900	36900	56600	96200	126000											499	221	210	204	242	289	369	566	962	1260
500	21900	20400	20000	23300	28400	36200	55900	93500	123000											500	219	204	200	233	284	362	559	935	1230
501	21700	20500	20000	23000	27900	35900	54500	91800	120000											501	217	205	200	230	279	359	545	918	1200
502	21200	20100	19600	23000	27500	35200	53900	89500	118000											502	212	201	196	230	275	352	539	895	1180
503	21000	19600	19300	22400	27300	34000	52600	87400	115000											503	210	196	193	224	273	340	526	874	1150
504	20900	19500	19500	22100	26600	34000	51300	85600	113000											504	209	195	195	221	266	340	513	856	1130
505	20800	19200	18800	22100	26200	32600	49900	84100	109000											505	208	192	188	221	262	326	499	841	1090
506	20500	19100	18500	21600	25200	32200	49200	81800	107000											506	205	191	185	216	252	322	492	818	1070
507	20000	18600	18500	21400	25400	32000	48200	79900	105000											507	200	186	185	214	254	320	482	799	1050
508	19400	18600	18000	20600	24800	31400	47000	78000	103000											508	194	186	180	206	248	314	470	780	1030
509	19300	18400	17900	20500	24000	30300	46400	75900	100000											509	193	184	179	205	240	303	464	759	1000
510	19300	17700	17500	20200	24100	29600	45000	74600	98000											510	193	177	175	202	241	296	450	746	980
511	18900	17900	17500	19800	23300	29300	44300	72800	95600											511	189	179	175	198	233	293	443	728	956
512	18700	17800	17000	19400	23300	28800	43500	71600	94200											512	187	178	170	194	233	288	435	716	942
513	18400	17100	16800	19600	22600	28200	42600	70100	91300											513	184	171	168	196	226	282	426	701	913
514	17900	17000	16400	19100	22300	27500	41700	68000	90300											514	179	170	164	191	223	275	417	680	903
515	17900	16800	16100	18800	22000	27100	40900	66400	87200											515	179	168	161	188	220	271	409	664	872
516	17400	16500	15800	18400	21700	26500	39900	64700	85700											516	174	165	158	184	217	265	399	647	857
517	17400	16100	15700	18000	21000	25400	39300	62600	82900											517	174	161	157	180	210	254	393	626	829
518	17300	15600	15200	17400	20600	25100	37800	61600	81700											518	173	156	152	174	206	251	378	616	817
519	16900	15400	15100	17300	20100	24900	37300	60500	79500											519	169	154	151	173	201	249	373	605	795
520	16600	15400	15000	17300	19600	24300	36700	58500	77200											520	166	154	150	173	196	243	367	585	772
521	16300	15100	14500	16700	19300	23600	35600	57300	75300											521	163	151	145	167	193	236	356	573	753
522	15800	15100	14500	16400	19300	23600	34800	56100	74300											522	158	151	145	164	193	236	348	561	743
523	15800	14800	14200	16300	19000	22300	34100	54600	71900											523	158	148	142	163	190	223	341	546	719
524	15800	14500	13800	15800	18500	22800	33100	53100	69700											524	158	145	138	158	185	228	331	531	697
525	15200	14100	13400	15900	18200	21900	32300	51200	68300											525	152	141	134	159	182	219	323	512	683
526	14700	14100	13400	15400	17500	21400	32100	50800	66900											526	147	141	134	154	175	214	321	508	669
527	14900	13900	13500	15300	17200	21000	30900	50000	65500											527	149	139	135	153	172	210	309	500	655
528	14800	13800	13300	14700	17500	20400	30700	48400	63600											528	148	138	133	147	175	204	307	484	636
529	14500	13700	13500	15000	17400	20400	29600	48100	62500											529	145	137	135	150	174	204	296	481	625
530	14400	13500	13100	14800	16800	19800	29300	46400	60700											530	144	135	131	148	168	198	293	464	607
531	14300	13600	13200	14400	16700	19400	28600	45600	59700											531	143	136	132	144	167	194	286	456	597
532	14000	12900	12600	14000	16000	19100	27900	43800	57900											532	140	129	126	140	160	191	279	438	579
533	13400	12700	11900	13800	15700	18300	27200	42500	56600											533	134	127	119	138	157	183	272	425	566
534	12700	12100	11600	13200	15200	17600	25900	41100	54200											534	127	121	116	132	152	176	259	411	542
535	12800	11900	11700	13200	14900	17700	25200	40100	53100											535	128	119	117	132	149	177	252	401	531
536	12500	11700	11300	12400	14500	16900	25100	39400	52400											536	125	117	113	124	145	169	251	394	524
537	12400	11500	11000	12400	13900	16600	24300	38500	50700											537	124	115	110	124	139	166	243	385	507
538	12000	11200	10700	12200	14000	16100	23700	37200	49400											538	120	112	107	122	140	161	237	372	494
539	11800	10800	10600	11900	13500	15900	23200	35700	47900											539	118	108	106	119	135	159	232	357	479
540	11600	11000	10300	12000	13400	15400	22700	35200	45900											540	116	110	103	120	134	154	227	352	459
541	11200	10700	10200	11400	12900	14700	22300	34000	44900											541	112	107	102	114	129	147	223	340	449
542	11300	10300	9980	11100	12900	14800	21900	33300	44000											542	113	103	99.8	111	129	148	219	333	440
543	10800	10100	9830	11000	12600	14500	21000	32800	43700											543	108	101	98.3	110	126	145	210	328	437
544	10700	10100	9480	10600	12300	14100	20500	32100	42500											544	107	101	94.8	106	123	141	205	321	425
545	10500	9900	9180	10600	11900	13800	20100	31100	41200											545	105	99	91.8	106	119	138	201	311	412
546	10400	9680	9280	10200	11700	13600	19400	30400	40000											546	104	96.8	92.8	102	117	136	194	304	400
547	9990	9340	9110	10200	11400	13000	19200	29500	39000											547	99.9	93.4	91.1	102	114	130	192	295	390
548	10100	9270	8690	10000	11100	13000	18600	28600	37500											548	101	92.7	86.9	100	111	130	186	286	375
549	9620	9330	8730	9970	11000	12700	18700	28100	37200											549	96.2	93.3	87.3	99.7	110	127	187	281	372
550	9360	8790	8490	9710	10600	12200	18100	27200	36000											550	93.6	87.9	84.9	97.1	106	122	181	272	360
551	9470	8790	8500	9090	10600	12300	17500	27100	35500											551	94.7	87.9	85	90.9	106	123	175	271	355
552	9100	8630	8450	9150	10400	11600	17100	25500	34500											552	91	86.3	84.5	91.5	104	116	171	255	345
553	9060	8260	8030	8710	10000	11400	16300	25300	33300											553	90.6	82.6	80.3	87.1	100	114	163	253	333
554	8670	8380	7880	9020	9590	11400	16500	24500	32400											554	86.7	83.8	78.8	90.2	95.9	114	165	245	324
555	8790	8150	7670	8820	9550	10800	15700	24400	31700											555	87.9	81.5	76.7	88.2	95.5	108	157	244	317
556	8600	8010	7700	8570	9870	10600	15100	23700	31000											556	86	80.1	77	85.7	98.7	106	151	237	310
557	8320	7810	7440	8180	9080	10200	15100	22700	30400											557	83.2	78.1	74.4	81.8	90.8	102	151	227	304
558	8480	7740	7230	8250	8990	10200	14500	22300	29400											558	84.8	77.4	72.3	82.5	89.9	102	145	223	294
559	7950	7430	7230	7960	8780	10100	14500	21900	28700											559	79.5	74.3	72.3	79.6	87.8	101	145	219	287
560	8100	7360	6890	7410	8850	9770	13900	21100	27900											560	81	73.6	68.9	74.1	88.5	97.7	139	211	279
561	7920	7220	6860	7550	8490	9730	13500	20500	27100											561	79.2	72.2	68.6	75.5	84.9	97.3	135	205	271
562	7690	6950	6680	7290	8680	9580	13200	20400	27000											562	76.9	69.5	66.8	72.9	86.8	95.8	132	204	270
563	7740	6960	6670	7530	8420	9200	13100	19700	26400											563	77.4	69.6	66.7	75.3	84.2	92	131	197	264
564	7770	7210	6770	7540	8450	9470	12700	19700	25800											564	77.7	72.1	67.7	75.4	84.5	94.7	127	197	258
565	7890	7100	6820	7300	8300	9340	12800	19400	25000											565	78.9	71	68.2	73	83	93.4	128	194	250
566	7910	7390	7140	7330	8240	9250	12700	19300	25500											566	79.1	73.9	71.4	73.3	82.4	92.5	127	193	255
567	8000	7150	6860	7680	8290	9130	12800	18700	24400											567	80	71.5	68.6	76.8	82.9	91.3	128	187	244
568	7690	7090	6940	7330	7820	9060	11800	18100	23600											568	76.9	70.9	69.4	73.3	78.2	90.6	118	181	236
569	7210	6710	6450	6950	7770	8380	11600	17500	22800											569	72.1	67.1	64.5	69.5	77.7	83.8	116	175	228
570	6860	6340	6090	6640	7290	8080	11200	16700	21900											570	68.6	63.4	60.9	66.4	72.9	80.8	112	167	219
571	6620	5980	5840	6400	7010	7890	10700	16400	21500											571	66.2	59.8	58.4	64	70.1	78.9	107	164	215
572	6260	5930	5680	6210	6780	7820	10400	15700	20800											572	62.6	59.3	56.8	62.1	67.8	78.2	104	157	208
573	6180	5600	5500	6070	6610	7260	10300	15000	20000											573	61.8	56	55	60.7	66.1	72.6	103	150	200
574	5900	5740	5220	5940	6400	7280	10200	14900	19700											574	59	57.4	52.2	59.4	64	72.8	102	149	197
575	5870	5430	5270	5720	6470	7120	10000	14600	19300											575	58.7	54.3	52.7	57.2	64.7	71.2	100	146	193
576	5840	5390	5180	5800	6300	6590	9820	14200	18800											576	58.4	53.9	51.8	58	63	65.9	98.2	142	188
577	5680	5280	4900	5400	5830	6790	9540	13500	18200											577	56.8	52.8	49	54	58.3	67.9	95.4	135	182
578	5330	5040	4940	5420	5950	6430	8980	13300	17700											578	53.3	50.4	49.4	54.2	59.5	64.3	89.8	133	177
579	5290	5010	4740	5380	5560	6440	8810	13400	17000											579	52.9	50.1	47.4	53.8	55.6	64.4	88.1	134	170
580	5480	5040	4490	5150	5960	6220	8670	13000	17200											580	54.8	50.4	44.9	51.5	59.6	62.2	86.7	130	172
581	5200	4950	4720	5240	5620	6150	8450	12500	16300											581	52	49.5	47.2	52.4	56.2	61.5	84.5	125	163
582	5190	4970	4640	4870	5250	6070	8510	12700	16500											582	51.9	49.7	46.4	48.7	52.5	60.7	85.1	127	165
583	5280	4490	4570	5120	5450	5980	8100	11700	15900											583	52.8	44.9	45.7	51.2	54.5	59.8	81	117	159
584	5090	4620	4540	5000	5210	5660	7760	11500	15200											584	50.9	46.2	45.4	50	52.1	56.6	77.6	115	152
585	5020	4510	4260	4790	5190	5490	7820	11400	15100											585	50.2	45.1	42.6	47.9	51.9	54.9	78.2	114	151
586	4930	4450	4040	4880	5080	5460	7640	10700	14400											586	49.3	44.5	40.4	48.8	50.8	54.6	76.4	107	144
587	4870	4290	4230	4610	4950	5310	7360	11000	14300											587	48.7	42.9	42.3	46.1	49.5	53.1	73.6	110	143
588	4550	4350	4160	4460	4700	5340	7260	10500	14100											588	45.5	43.5	41.6	44.6	47	53.4	72.6	105	141
589	4610	4420	4070	4320	4730	5310	6910	10300	13600											589	46.1	44.2	40.7	43.2	47.3	53.1	69.1	103	136
590	4490	4130	4150	4480	4830	5020	6920	9860	13600											590	44.9	41.3	41.5	44.8	48.3	50.2	69.2	98.6	136
591	4400	4280	3830	4280	4680	4980	6750	9980	13000											591	44	42.8	38.3	42.8	46.8	49.8	67.5	99.8	130
592	4370	4140	3820	4270	4500	4970	6750	9850	12600											592	43.7	41.4	38.2	42.7	45	49.7	67.5	98.5	126
593	4240	3980	3770	4110	4510	4810	6520	9600	12600											593	42.4	39.8	37.7	41.1	45.1	48.1	65.2	96	126
594	4090	3880	3590	3840	4440	4720	6350	9350	12000											594	40.9	38.8	35.9	38.4	44.4	47.2	63.5	93.5	120
595	4100	3940	3570	3920	4280	4620	6190	8960	11900											595	41	39.4	35.7	39.2	42.8	46.2	61.9	89.6	119
596	3930	3720	3580	3980	4190	4360	5780	8900	11300											596	39.3	37.2	35.8	39.8	41.9	43.6	57.8	89	113
597	3900	3430	3460	3770	4350	4520	5810	8680	11100											597	39	34.3	34.6	37.7	43.5	45.2	58.1	86.8	111
598	3780	3560	3520	3610	4120	4450	5890	8490	11200											598	37.8	35.6	35.2	36.1	41.2	44.5	58.9	84.9	112
599	3710	3460	3240	3680	3730	4280	5690	8080	10900											599	37.1	34.6	32.4	36.8	37.3	42.8	56.9	80.8	109
600	3570	3640	3360	3460	3980	4150	5480	7980	10300											600	35.7	36.4	33.6	34.6	39.8	41.5	54.8	79.8	103
601	4040	3310	3160	3570	3820	4040	5530	7990	9900											601	40.4	33.1	31.6	35.7	38.2	40.4	55.3	79.9	99
602	3500	3480	3150	3420	3680	3930	5240	7820	10100											602	35	34.8	31.5	34.2	36.8	39.3	52.4	78.2	101
603	3470	3210	3110	3250	3830	4080	5290	7600	9980											603	34.7	32.1	31.1	32.5	38.3	40.8	52.9	76	99.8
604	3510	3140	3120	3450	3650	3850	5240	7240	9590											604	35.1	31.4	31.2	34.5	36.5	38.5	52.4	72.4	95.9
605	3380	3220	3020	3080	3630	3860	5040	7190	9630											605	33.8	32.2	30.2	30.8	36.3	38.6	50.4	71.9	96.3
606	3680	3170	2930	3300	3610	3570	5070	7090	8900											606	36.8	31.7	29.3	33	36.1	35.7	50.7	70.9	89
607	3300	3110	2890	2920	3440	3330	4790	6770	9110											607	33	31.1	28.9	29.2	34.4	33.3	47.9	67.7	91.1
608	3260	2960	2960	2980	3400	3420	4530	6730	8950											608	32.6	29.6	29.6	29.8	34	34.2	45.3	67.3	89.5
609	3240	2990	3010	3200	3170	3480	4780	6410	8750											609	32.4	29.9	30.1	32	31.7	34.8	47.8	64.1	87.5
610	3300	2920	2730	2950	3180	3440	4740	6440	8530											610	33	29.2	27.3	29.5	31.8	34.4	47.4	64.4	85.3
611	2910	2810	2730	2900	3110	3390	4510	6250	8290											611	29.1	28.1	27.3	29	31.1	33.9	45.1	62.5	82.9
612	3090	2940	2940	2890	2950	3200	4430	6230	8320											612	30.9	29.4	29.4	28.9	29.5	32	44.3	62.3	83.2
613	3020	2920	2750	2990	3110	3410	4190	6100	7640											613	30.2	29.2	27.5	29.9	31.1	34.1	41.9	61	76.4
614	3160	2700	2720	2620	3220	3220	4070	6010	7830											614	31.6	27	27.2	26.2	32.2	32.2	40.7	60.1	78.3
615	3010	2690	2680	2880	3090	3150	4170	5880	7800											615	30.1	26.9	26.8	28.8	30.9	31.5	41.7	58.8	78
616	3150	2610	2730	2650	3140	3130	4060	6000	7630											616	31.5	26.1	27.3	26.5	31.4	31.3	40.6	60	76.3
617	2940	2930	2690	2720	3130	3280	4010	5590	7910											617	29.4	29.3	26.9	27.2	31.3	32.8	40.1	55.9	79.1
618	3040	2870	2690	2790	3080	3160	3960	5720	7440											618	30.4	28.7	26.9	27.9	30.8	31.6	39.6	57.2	74.4
619	2730	2650	2670	2770	3160	3050	3710	5560	7170											619	27.3	26.5	26.7	27.7	31.6	30.5	37.1	55.6	71.7
620	2640	2430	2510	2570	2710	2970	3820	5480	6970											620	26.4	24.3	25.1	25.7	27.1	29.7	38.2	54.8	69.7
621	2970	2530	2450	2560	2560	2820	3730	4950	6580											621	29.7	25.3	24.5	25.6	25.6	28.2	37.3	49.5	65.8
622	2550	2520	2520	2400	2850	2830	3680	5150	6280											622	25.5	25.2	25.2	24	28.5	28.3	36.8	51.5	62.8
623	2670	2330	2270	2300	2470	2630	3470	5420	6630											623	26.7	23.3	22.7	23	24.7	26.3	34.7	54.2	66.3
624	2600	2340	2370	2430	2650	2830	3440	4920	6430											624	26	23.4	23.7	24.3	26.5	28.3	34.4	49.2	64.3
625	2370	2270	2290	2390	2510	2610	3380	4840	6100											625	23.7	22.7	22.9	23.9	25.1	26.1	33.8	48.4	61
626	2260	2180	2110	2370	2500	2560	3330	4770	6080											626	22.6	21.8	21.1	23.7	25	25.6	33.3	47.7	60.8
627	2470	2150	2050	2280	2530	2650	3360	4710	5830											627	24.7	21.5	20.5	22.8	25.3	26.5	33.6	47.1	58.3
628	2410	2280	2280	2280	2390	2660	3230	4350	6160											628	24.1	22.8	22.8	22.8	23.9	26.6	32.3	43.5	61.6
629	2440	2290	2260	2250	2400	2440	3190	4350	5870											629	24.4	22.9	22.6	22.5	24	24.4	31.9	43.5	58.7
630	2570	2280	2100	2210	2410	2590	3110	4370	5810											630	25.7	22.8	21	22.1	24.1	25.9	31.1	43.7	58.1
631	2200	2310	2130	2060	2160	2580	3210	4340	5660											631	22	23.1	21.3	20.6	21.6	25.8	32.1	43.4	56.6
632	2540	2110	1960	2030	2230	2290	2950	4320	5620											632	25.4	21.1	19.6	20.3	22.3	22.9	29.5	43.2	56.2
633	2570	2200	2160	2020	2370	2400	2980	4210	5420											633	25.7	22	21.6	20.2	23.7	24	29.8	42.1	54.2
634	2370	2060	1970	2060	2360	2500	2960	4120	5570											634	23.7	20.6	19.7	20.6	23.6	25	29.6	41.2	55.7
635	2160	2160	1980	2130	2010	2270	2730	4200	5500											635	21.6	21.6	19.8	21.3	20.1	22.7	27.3	42	55
636	2180	1890	2030	2030	2030	2120	2710	3990	5250											636	21.8	18.9	20.3	20.3	20.3	21.2	27.1	39.9	52.5
637	2080	1950	1990	2050	2020	2290	2980	3870	5430											637	20.8	19.5	19.9	20.5	20.2	22.9	29.8	38.7	54.3
638	2110	1970	1960	1990	2150	2310	2810	4010	5090											638	21.1	19.7	19.6	19.9	21.5	23.1	28.1	40.1	50.9
639	2080	1930	2020	1980	2090	2510	2820	3890	4890											639	20.8	19.3	20.2	19.8	20.9	25.1	28.2	38.9	48.9
640	2320	2020	1740	2080	2000	2060	2740	3650	4930											640	23.2	20.2	17.4	20.8	20	20.6	27.4	36.5	49.3
641	2080	2150	1810	1830	2230	2150	2760	3910	4760											641	20.8	21.5	18.1	18.3	22.3	21.5	27.6	39.1	47.6
642	2250	1730	2020	1960	1940	2150	2670	3690	4640											642	22.5	17.3	20.2	19.6	19.4	21.5	26.7	36.9	46.4
643	2320	1960	2030	2170	2190	2150	2630	3660	4750											643	23.2	19.6	20.3	21.7	21.9	21.5	26.3	36.6	47.5
644	2650	2320	2500	2170	2250	2480	2910	4270	5080											644	26.5	23.2	25	21.7	22.5	24.8	29.1	42.7	50.8
645	3100	2800	2850	2640	2620	2910	3000	4460	5490											645	31	28	28.5	26.4	26.2	29.1	30	44.6	54.9
646	3760	3280	3390	3330	3340	3760	3810	5270	6270											646	37.6	32.8	33.9	33.3	33.4	37.6	38.1	52.7	62.7
647	5020	4060	4320	3810	3920	4170	4330	6030	7310											647	50.2	40.6	43.2	38.1	39.2	41.7	43.3	60.3	73.1
648	5830	5190	4770	4600	4860	4640	4780	6710	8190											648	58.3	51.9	47.7	46	48.6	46.4	47.8	67.1	81.9
649	6260	5530	5500	5050	5420	5360	5070	7310	8770											649	62.6	55.3	55	50.5	54.2	53.6	50.7	73.1	87.7
650	5580	5380	5440	4900	4850	5110	5110	6790	8310											650	55.8	53.8	54.4	49	48.5	51.1	51.1	67.9	83.1
651	5200	4890	4870	4640	4550	4500	4760	6460	7920											651	52	48.9	48.7	46.4	45.5	45	47.6	64.6	79.2
652	4250	3960	3850	3750	3930	3870	4100	5660	7140											652	42.5	39.6	38.5	37.5	39.3	38.7	41	56.6	71.4
653	3440	3230	3160	3270	3350	3200	3580	4780	5720											653	34.4	32.3	31.6	32.7	33.5	32	35.8	47.8	57.2
654	2680	2690	2510	2360	2320	2450	2960	3740	4840											654	26.8	26.9	25.1	23.6	23.2	24.5	29.6	37.4	48.4
655	2070	2050	1980	1980	2220	2350	2580	3620	4410											655	20.7	20.5	19.8	19.8	22.2	23.5	25.8	36.2	44.1
656	2020	1940	1820	1680	1780	1900	2170	3250	4130											656	20.2	19.4	18.2	16.8	17.8	19	21.7	32.5	41.3
657	2290	1780	1830	1760	1870	2040	2120	3370	3770											657	22.9	17.8	18.3	17.6	18.7	20.4	21.2	33.7	37.7
658	1860	1830	1800	1990	2040	1910	1950	2900	3720											658	18.6	18.3	18	19.9	20.4	19.1	19.5	29	37.2
659	2230	1880	1640	1820	1900	1880	2210	3130	3630											659	22.3	18.8	16.4	18.2	19	18.8	22.1	31.3	36.3
660	2050	1910	1870	1880	1880	1650	2140	2830	3530											660	20.5	19.1	18.7	18.8	18.8	16.5	21.4	28.3	35.3
661	2010	1910	1730	1610	1760	1800	2250	2910	3710											661	20.1	19.1	17.3	16.1	17.6	18	22.5	29.1	37.1
662	2110	1760	1800	1790	1740	1750	1940	2960	3440											662	21.1	17.6	18	17.9	17.4	17.5	19.4	29.6	34.4
663	1950	1750	1670	1690	1880	1870	2170	2970	3650											663	19.5	17.5	16.7	16.9	18.8	18.7	21.7	29.7	36.5
664	1790	1610	1640	1700	1740	1750	2060	2940	3700											664	17.9	16.1	16.4	17	17.4	17.5	20.6	29.4	37
665	1900	1830	1980	1700	1830	1760	1900	2880	3670											665	19	18.3	19.8	17	18.3	17.6	19	28.8	36.7
666	1930	1850	1800	1690	1780	1870	1760	2860	3570											666	19.3	18.5	18	16.9	17.8	18.7	17.6	28.6	35.7
667	1730	1760	1860	1690	1850	1840	2060	2560	3380											667	17.3	17.6	18.6	16.9	18.5	18.4	20.6	25.6	33.8
668	2040	1800	1880	1830	1770	1890	1950	2860	3620											668	20.4	18	18.8	18.3	17.7	18.9	19.5	28.6	36.2
669	2060	1710	1640	1570	1750	1790	2050	2850	3320											669	20.6	17.1	16.4	15.7	17.5	17.9	20.5	28.5	33.2
670	2180	1730	1670	1820	1870	1850	1920	2850	3470											670	21.8	17.3	16.7	18.2	18.7	18.5	19.2	28.5	34.7
671	1990	1740	1890	1800	1830	1900	1970	2800	3340											671	19.9	17.4	18.9	18	18.3	19	19.7	28	33.4
672	1860	1700	1590	1960	1720	2000	2060	2790	3490											672	18.6	17	15.9	19.6	17.2	20	20.6	27.9	34.9
673	1730	1960	1710	1620	1770	1840	2040	2910	3540											673	17.3	19.6	17.1	16.2	17.7	18.4	20.4	29.1	35.4
674	1830	1730	1790	1740	1760	1800	1840	2720	3110											674	18.3	17.3	17.9	17.4	17.6	18	18.4	27.2	31.1
675	1880	1820	1740	1700	1650	1940	2050	2870	3540											675	18.8	18.2	17.4	17	16.5	19.4	20.5	28.7	35.4
676	2110	1900	1860	1670	1930	2080	2150	2870	3550											676	21.1	19	18.6	16.7	19.3	20.8	21.5	28.7	35.5
677	2260	1870	1830	1910	2050	1890	2010	2740	3660											677	22.6	18.7	18.3	19.1	20.5	18.9	20.1	27.4	36.6
678	2250	2020	1720	1780	1840	1910	2330	2760	3260											678	22.5	20.2	17.2	17.8	18.4	19.1	23.3	27.6	32.6
679	2260	1930	1910	1780	1740	1890	1980	2750	3580											679	22.6	19.3	19.1	17.8	17.4	18.9	19.8	27.5	35.8
680	583	615	717	560	647	692	904	1120	1700											680	5.83	6.15	7.17	5.6	6.47	6.92	9.04	11.2	17
681	653	617	671	654	657	658	952	1100	1610											681	6.53	6.17	6.71	6.54	6.57	6.58	9.52	11	16.1
682	620	540	609	678	725	602	864	1210	1650											682	6.2	5.4	6.09	6.78	7.25	6.02	8.64	12.1	16.5
683	557	655	515	731	677	596	758	1210	1470											683	5.57	6.55	5.15	7.31	6.77	5.96	7.58	12.1	14.7
684	573	642	581	578	485	508	865	1040	1610											684	5.73	6.42	5.81	5.78	4.85	5.08	8.65	10.4	16.1
685	588	511	500	617	537	598	674	1130	1370											685	5.88	5.11	5	6.17	5.37	5.98	6.74	11.3	13.7
686	634	541	567	633	536	522	768	1070	1570											686	6.34	5.41	5.67	6.33	5.36	5.22	7.68	10.7	15.7
687	680	662	422	689	613	591	740	934	1530											687	6.8	6.62	4.22	6.89	6.13	5.91	7.4	9.34	15.3
688	621	548	459	486	551	560	743	1040	1310											688	6.21	5.48	4.59	4.86	5.51	5.6	7.43	10.4	13.1
689	606	556	537	620	559	609	713	944	1310											689	6.06	5.56	5.37	6.2	5.59	6.09	7.13	9.44	13.1
690	671	421	505	541	495	569	682	1150	1350											690	6.71	4.21	5.05	5.41	4.95	5.69	6.82	11.5	13.5
691	488	484	537	589	510	453	766	874	1380											691	4.88	4.84	5.37	5.89	5.1	4.53	7.66	8.74	13.8
692	593	515	503	598	560	610	803	929	1250											692	5.93	5.15	5.03	5.98	5.6	6.1	8.03	9.29	12.5
693	676	548	469	597	500	611	680	1030	1410											693	6.76	5.48	4.69	5.97	5	6.11	6.8	10.3	14.1
694	502	497	544	555	559	620	793	965	1080											694	5.02	4.97	5.44	5.55	5.59	6.2	7.93	9.65	10.8
695	560	573	440	503	601	603	664	997	1400											695	5.6	5.73	4.4	5.03	6.01	6.03	6.64	9.97	14
696	560	382	507	361	637	523	683	905	1170											696	5.6	3.82	5.07	3.61	6.37	5.23	6.83	9.05	11.7
697	576	520	514	473	440	603	747	892	1120											697	5.76	5.2	5.14	4.73	4.4	6.03	7.47	8.92	11.2
698	594	590	459	516	565	538	767	786	1070											698	5.94	5.9	4.59	5.16	5.65	5.38	7.67	7.86	10.7
699	522	562	493	524	638	592	621	964	1190											699	5.22	5.62	4.93	5.24	6.38	5.92	6.21	9.64	11.9
700	429	515	566	419	413	507	526	913	1300											700	4.29	5.15	5.66	4.19	4.13	5.07	5.26	9.13	13
