# Supplementary material for: Daptomycin forms a stable complex with phosphatidylglycerol for selective uptake to bacterial membrane
Source: eLife. 2025 Jun 2;13:RP93267. doi: 10.7554/eLife.93267 (PMC12129450; doi:10.7554/eLife.93267)
Supplement: Figure 2—figure supplement 3—source data 5. [file elife-93267-fig2-figsupp3-data5.xlsx]

## Sheet: Multi Scans EM
Wavelength(nm)	Control	0.65uM	1.30uM	2.60uM	5.20uM	10.41uM	20.83uM	41.66uM	83.33uM											Wavelength(nm)	Control	1.30uM	2.60uM	5.20uM	10.41uM	20.83uM	41.66uM	83.33uM
385	2520	2380	5380	1950	5600	2700	3920	5350	6880											385	25.2	53.8	19.5	56	27	39.2	53.5	68.8
386	2340	2220	5090	1700	5260	2640	3430	5190	6430											386	23.4	50.9	17	52.6	26.4	34.3	51.9	64.3
387	2210	2070	4790	1590	4880	2480	3360	4870	6150											387	22.1	47.9	15.9	48.8	24.8	33.6	48.7	61.5
388	2010	1990	4490	1470	4680	2280	3170	4520	5750											388	20.1	44.9	14.7	46.8	22.8	31.7	45.2	57.5
389	1910	1880	4210	1430	4190	2290	2930	4230	5400											389	19.1	42.1	14.3	41.9	22.9	29.3	42.3	54
390	1830	1940	4030	1390	4090	2280	2820	4180	5310											390	18.3	40.3	13.9	40.9	22.8	28.2	41.8	53.1
391	1780	1670	3760	1370	3750	2180	2610	3950	5100											391	17.8	37.6	13.7	37.5	21.8	26.1	39.5	51
392	1620	1690	3530	1240	3600	2060	2660	4040	5010											392	16.2	35.3	12.4	36	20.6	26.6	40.4	50.1
393	1530	1580	3370	1190	3520	2230	2570	4000	5020											393	15.3	33.7	11.9	35.2	22.3	25.7	40	50.2
394	1540	1710	3290	1200	3250	2390	2560	3930	5040											394	15.4	32.9	12	32.5	23.9	25.6	39.3	50.4
395	1460	1570	3050	1170	3280	2440	2560	4060	5380											395	14.6	30.5	11.7	32.8	24.4	25.6	40.6	53.8
396	1380	1640	3150	1170	3210	2650	2610	4230	5600											396	13.8	31.5	11.7	32.1	26.5	26.1	42.3	56
397	1290	1670	3040	1320	3110	2780	2780	4420	5790											397	12.9	30.4	13.2	31.1	27.8	27.8	44.2	57.9
398	1420	1730	2940	1290	3260	3050	2830	4570	6200											398	14.2	29.4	12.9	32.6	30.5	28.3	45.7	62
399	1240	1820	2940	1320	3160	3320	2830	4910	6780											399	12.4	29.4	13.2	31.6	33.2	28.3	49.1	67.8
400	1300	1960	2690	1370	2960	3700	2890	5110	7290											400	13	26.9	13.7	29.6	37	28.9	51.1	72.9
401	1190	1980	2790	1520	3110	4030	3240	5740	7860											401	11.9	27.9	15.2	31.1	40.3	32.4	57.4	78.6
402	1310	2210	2770	1500	3080	4510	3360	6210	9020											402	13.1	27.7	15	30.8	45.1	33.6	62.1	90.2
403	1260	2340	2740	1630	3250	4930	3680	6850	9920											403	12.6	27.4	16.3	32.5	49.3	36.8	68.5	99.2
404	1260	2600	2850	1750	3340	5610	4000	7650	11000											404	12.6	28.5	17.5	33.4	56.1	40	76.5	110
405	1230	2900	2900	1920	3540	6410	4460	8550	12400											405	12.3	29	19.2	35.4	64.1	44.6	85.5	124
406	1300	3100	3040	2060	3680	7060	4930	9370	14100											406	13	30.4	20.6	36.8	70.6	49.3	93.7	141
407	1350	3430	3010	2260	3880	8000	5320	10500	15300											407	13.5	30.1	22.6	38.8	80	53.2	105	153
408	1450	3810	3420	2550	4060	8850	5790	11600	17100											408	14.5	34.2	25.5	40.6	88.5	57.9	116	171
409	1510	4260	3630	2890	4470	9960	6620	13200	19400											409	15.1	36.3	28.9	44.7	99.6	66.2	132	194
410	1400	4790	3440	3110	4620	11300	7100	14400	21100											410	14	34.4	31.1	46.2	113	71	144	211
411	1530	5420	3820	3670	5210	12400	8060	16300	23600											411	15.3	38.2	36.7	52.1	124	80.6	163	236
412	1720	6240	4450	4100	5760	14300	9050	17900	26500											412	17.2	44.5	41	57.6	143	90.5	179	265
413	1950	7240	5050	4620	6610	15800	10000	20100	29300											413	19.5	50.5	46.2	66.1	158	100	201	293
414	2260	8250	5650	5330	7520	18300	11300	22600	32200											414	22.6	56.5	53.3	75.2	183	113	226	322
415	2580	8990	6420	6020	8170	19500	12400	24700	35200											415	25.8	64.2	60.2	81.7	195	124	247	352
416	2630	10200	6770	6570	9020	21900	13600	27000	38400											416	26.3	67.7	65.7	90.2	219	136	270	384
417	2950	10800	7430	6840	9720	23400	14700	29200	41600											417	29.5	74.3	68.4	97.2	234	147	292	416
418	3100	11700	7660	7590	10300	25000	15900	31000	44700											418	31	76.6	75.9	103	250	159	310	447
419	3090	12200	8150	7800	10800	27100	16900	33900	47800											419	30.9	81.5	78	108	271	169	339	478
420	3190	13000	8150	8150	11000	28500	17700	36400	50900											420	31.9	81.5	81.5	110	285	177	364	509
421	3020	13200	8230	8430	11500	29600	18800	37800	53200											421	30.2	82.3	84.3	115	296	188	378	532
422	3000	13900	8520	8660	11800	31300	19400	39400	56500											422	30	85.2	86.6	118	313	194	394	565
423	3130	14300	8480	9050	11800	32700	20300	41700	60400											423	31.3	84.8	90.5	118	327	203	417	604
424	3220	14900	9030	9520	12500	34600	21400	44200	62700											424	32.2	90.3	95.2	125	346	214	442	627
425	3320	15300	9110	9910	12800	36300	22300	46100	65700											425	33.2	91.1	99.1	128	363	223	461	657
426	3420	16500	9900	10600	13600	38100	23500	48900	69400											426	34.2	99	106	136	381	235	489	694
427	3660	17300	10500	11100	14400	39900	24600	51300	72600											427	36.6	105	111	144	399	246	513	726
428	3800	18500	11000	11500	15200	42500	25800	53700	75800											428	38	110	115	152	425	258	537	758
429	4110	19300	11600	12300	15800	44100	26800	55200	79200											429	41.1	116	123	158	441	268	552	792
430	4420	20300	12200	12800	16900	46400	28400	58500	82900											430	44.2	122	128	169	464	284	585	829
431	4580	21300	12900	13500	17700	48200	29500	60700	86100											431	45.8	129	135	177	482	295	607	861
432	4830	22300	13800	14200	18400	50200	30800	63200	89000											432	48.3	138	142	184	502	308	632	890
433	5110	23300	14300	14900	19000	51600	32000	64600	91600											433	51.1	143	149	190	516	320	646	916
434	5270	24100	14700	15600	20000	53400	32800	67000	95000											434	52.7	147	156	200	534	328	670	950
435	5560	25300	15600	16100	20400	54900	33800	68500	96800											435	55.6	156	161	204	549	338	685	968
436	5770	26200	15900	16500	21300	57300	34900	70700	99600											436	57.7	159	165	213	573	349	707	996
437	6070	27200	16400	17100	21900	58300	35800	72300	102000											437	60.7	164	171	219	583	358	723	1020
438	6320	27600	17300	17700	22800	60400	36800	74000	105000											438	63.2	173	177	228	604	368	740	1050
439	6470	28700	17800	17800	23500	61500	38300	75500	107000											439	64.7	178	178	235	615	383	755	1070
440	6750	29400	18400	18700	24200	63500	38600	77500	110000											440	67.5	184	187	242	635	386	775	1100
441	7270	30400	19700	19300	25100	64500	39600	78800	111000											441	72.7	197	193	251	645	396	788	1110
442	7190	31000	20000	20100	25800	65900	40100	80000	112000											442	71.9	200	201	258	659	401	800	1120
443	7460	31800	20500	20400	26500	66800	41200	81200	114000											443	74.6	205	204	265	668	412	812	1140
444	7670	32300	21200	20800	26900	68300	41800	83200	116000											444	76.7	212	208	269	683	418	832	1160
445	7880	33100	22000	21500	28000	69500	42700	83400	117000											445	78.8	220	215	280	695	427	834	1170
446	8020	33900	22500	21600	28700	70100	43300	85800	119000											446	80.2	225	216	287	701	433	858	1190
447	8600	34500	23500	22200	29600	71600	44400	87000	121000											447	86	235	222	296	716	444	870	1210
448	8950	35400	24200	22600	30200	72200	44500	87600	122000											448	89.5	242	226	302	722	445	876	1220
449	9070	36200	24300	23000	30500	73300	45500	87900	123000											449	90.7	243	230	305	733	455	879	1230
450	8960	36300	24400	23000	30600	73200	45300	87900	122000											450	89.6	244	230	306	732	453	879	1220
451	9220	36900	24900	23100	30900	74500	45300	88700	123000											451	92.2	249	231	309	745	453	887	1230
452	9180	37300	24600	23500	30900	74800	45700	89700	124000											452	91.8	246	235	309	748	457	897	1240
453	9320	37900	25400	23700	31100	74800	45800	89300	124000											453	93.2	254	237	311	748	458	893	1240
454	9430	38200	25300	24400	31400	75900	46300	90500	124000											454	94.3	253	244	314	759	463	905	1240
455	9530	38700	26200	24500	31900	76400	47100	90200	125000											455	95.3	262	245	319	764	471	902	1250
456	9760	38700	26400	24800	32500	76600	46400	89900	124000											456	97.6	264	248	325	766	464	899	1240
457	9870	39300	26500	24600	32400	76700	46500	89500	125000											457	98.7	265	246	324	767	465	895	1250
458	9890	39700	26900	24800	33100	77400	46700	90000	125000											458	98.9	269	248	331	774	467	900	1250
459	9960	39600	27000	25200	33200	77000	47500	90200	125000											459	99.6	270	252	332	770	475	902	1250
460	10400	39900	27700	25600	33000	77400	47100	89600	124000											460	104	277	256	330	774	471	896	1240
461	10400	39900	27800	25500	33300	77900	47200	89700	124000											461	104	278	255	333	779	472	897	1240
462	10500	40100	28000	25700	33800	77600	46900	90000	124000											462	105	280	257	338	776	469	900	1240
463	10500	40400	28000	25900	33500	77300	46900	90200	123000											463	105	280	259	335	773	469	902	1230
464	10700	40400	28200	25300	34300	77100	46900	89000	123000											464	107	282	253	343	771	469	890	1230
465	10500	40300	28800	25700	33700	77500	46800	88300	121000											465	105	288	257	337	775	468	883	1210
466	10600	41000	28700	25700	34000	76700	46700	87900	121000											466	106	287	257	340	767	467	879	1210
467	10700	41000	29000	25700	34400	76200	46700	88100	120000											467	107	290	257	344	762	467	881	1200
468	11000	40900	28900	25900	34500	76100	46600	87000	119000											468	110	289	259	345	761	466	870	1190
469	10600	40600	28700	25800	34300	76200	46100	86300	119000											469	106	287	258	343	762	461	863	1190
470	10900	40700	29400	25800	34300	75200	45700	85900	117000											470	109	294	258	343	752	457	859	1170
471	11100	40700	29300	25400	33900	75300	45900	85700	116000											471	111	293	254	339	753	459	857	1160
472	11100	40400	29300	25800	34300	74500	45400	85000	116000											472	111	293	258	343	745	454	850	1160
473	10900	40400	28900	25600	34000	74100	45000	83900	114000											473	109	289	256	340	741	450	839	1140
474	11000	39800	29100	25700	34200	73500	44500	82800	112000											474	110	291	257	342	735	445	828	1120
475	10800	39700	29100	25500	33600	72600	44700	82000	111000											475	108	291	255	336	726	447	820	1110
476	10600	39300	29000	25100	33600	72300	44000	81700	109000											476	106	290	251	336	723	440	817	1090
477	10700	39100	28800	25000	33500	71700	44200	80100	109000											477	107	288	250	335	717	442	801	1090
478	10900	39300	28800	25100	33200	71600	43500	79800	108000											478	109	288	251	332	716	435	798	1080
479	10900	39700	28500	24900	33400	70500	43000	79100	107000											479	109	285	249	334	705	430	791	1070
480	11000	38900	28400	24800	33100	69300	43000	78300	105000											480	110	284	248	331	693	430	783	1050
481	10900	38100	28700	24600	32700	69300	41800	77100	104000											481	109	287	246	327	693	418	771	1040
482	11100	38100	28100	24100	32800	67900	41700	76200	102000											482	111	281	241	328	679	417	762	1020
483	10700	38500	27700	24000	32700	67400	40800	75000	101000											483	107	277	240	327	674	408	750	1010
484	10700	38100	27900	23900	32200	66400	40600	74000	99500											484	107	279	239	322	664	406	740	995
485	10600	37400	27900	23500	31900	66000	40100	72400	98100											485	106	279	235	319	660	401	724	981
486	10400	37200	27800	23700	31400	65100	39400	71400	96900											486	104	278	237	314	651	394	714	969
487	10500	36600	27200	23100	31300	64600	39400	70800	94300											487	105	272	231	313	646	394	708	943
488	10400	36600	27100	22700	30700	62700	38200	70000	93300											488	104	271	227	307	627	382	700	933
489	10300	35600	27300	22400	30400	62100	38100	67900	91700											489	103	273	224	304	621	381	679	917
490	10200	35700	27500	22400	30000	61700	37600	67000	90700											490	102	275	224	300	617	376	670	907
491	10100	35200	26600	22400	30000	60500	36600	66100	88200											491	101	266	224	300	605	366	661	882
492	10300	35000	26400	21800	30300	60000	36800	65500	86600											492	103	264	218	303	600	368	655	866
493	9900	34600	26600	21800	29800	59000	36000	64600	86100											493	99	266	218	298	590	360	646	861
494	10100	33800	26100	21400	29000	58000	35500	63000	84700											494	101	261	214	290	580	355	630	847
495	9840	33700	25800	21000	28700	57400	34500	62400	83000											495	98.4	258	210	287	574	345	624	830
496	9940	33000	25400	20900	28700	56300	34100	61600	80800											496	99.4	254	209	287	563	341	616	808
497	9560	32900	25400	20300	27900	55500	33700	60000	80000											497	95.6	254	203	279	555	337	600	800
498	9640	32500	24900	20700	27600	54600	33600	59300	78400											498	96.4	249	207	276	546	336	593	784
499	9670	31800	24600	20200	27600	53400	33000	57600	77400											499	96.7	246	202	276	534	330	576	774
500	9300	31100	24100	19700	27200	52500	32200	56800	75200											500	93	241	197	272	525	322	568	752
501	9410	31200	24200	19400	26700	51300	31600	56000	73900											501	94.1	242	194	267	513	316	560	739
502	9500	30300	23600	19000	26400	51100	31200	54700	73300											502	95	236	190	264	511	312	547	733
503	8920	30100	23300	18800	26200	50900	30800	53200	71300											503	89.2	233	188	262	509	308	532	713
504	8990	30000	23000	18600	25400	49400	30000	52600	69400											504	89.9	230	186	254	494	300	526	694
505	8940	29300	23000	18200	25600	48000	29600	51600	68400											505	89.4	230	182	256	480	296	516	684
506	8760	28800	22300	18200	25000	47400	29100	51300	66800											506	87.6	223	182	250	474	291	513	668
507	8590	28300	22200	17700	24600	46500	28300	49600	65800											507	85.9	222	177	246	465	283	496	658
508	8600	28000	21800	17800	24300	46000	27900	48900	63500											508	86	218	178	243	460	279	489	635
509	8410	27300	21800	17300	23900	45100	27400	47700	62900											509	84.1	218	173	239	451	274	477	629
510	8070	26900	21100	17100	23400	44100	26900	47200	61700											510	80.7	211	171	234	441	269	472	617
511	8090	26400	21300	16700	23000	42800	26400	46000	60200											511	80.9	213	167	230	428	264	460	602
512	8020	26100	21000	16600	22600	42400	26300	45100	58400											512	80.2	210	166	226	424	263	451	584
513	7940	25600	20800	16500	22400	41700	26000	43600	57200											513	79.4	208	165	224	417	260	436	572
514	7700	25300	20200	15800	22100	41100	24900	43200	56500											514	77	202	158	221	411	249	432	565
515	7670	25100	19900	15800	21800	40300	24400	42100	55400											515	76.7	199	158	218	403	244	421	554
516	7530	24500	19600	15200	21300	39500	24300	41200	54100											516	75.3	196	152	213	395	243	412	541
517	7380	23900	19700	15400	21300	38500	23800	40500	52500											517	73.8	197	154	213	385	238	405	525
518	7200	23500	19100	15000	20300	38400	23200	39100	51700											518	72	191	150	203	384	232	391	517
519	7220	23100	18800	14400	20300	36800	22700	39300	50200											519	72.2	188	144	203	368	227	393	502
520	7200	22300	18400	14400	19700	36400	22000	38400	49800											520	72	184	144	197	364	220	384	498
521	7270	22300	17900	13900	19700	35300	21400	37100	48400											521	72.7	179	139	197	353	214	371	484
522	6960	21900	17400	14100	19200	34800	21300	36200	47400											522	69.6	174	141	192	348	213	362	474
523	6600	21300	17500	13500	18900	34100	21100	35600	45600											523	66	175	135	189	341	211	356	456
524	6890	21300	16900	13500	18700	33500	20400	34900	44900											524	68.9	169	135	187	335	204	349	449
525	6440	21100	17100	13100	18300	33000	20100	33700	44000											525	64.4	171	131	183	330	201	337	440
526	6470	20000	16500	12700	17800	31800	19900	33300	42900											526	64.7	165	127	178	318	199	333	429
527	6390	20200	16600	12800	17700	31400	19300	32300	42000											527	63.9	166	128	177	314	193	323	420
528	6300	19600	16400	12200	17700	30900	19100	32300	41900											528	63	164	122	177	309	191	323	419
529	6310	19200	16300	12500	17600	30200	18800	31600	40200											529	63.1	163	125	176	302	188	316	402
530	6260	19100	16000	11800	17200	29800	18600	30700	39900											530	62.6	160	118	172	298	186	307	399
531	6490	18600	15900	11700	16700	28900	18000	30400	38800											531	64.9	159	117	167	289	180	304	388
532	6220	18400	15200	11300	16600	28400	17800	29000	37800											532	62.2	152	113	166	284	178	290	378
533	5710	17600	14700	11300	16200	27400	17200	28300	36700											533	57.1	147	113	162	274	172	283	367
534	5660	17500	14600	11200	15500	27000	16800	27600	35200											534	56.6	146	112	155	270	168	276	352
535	5680	17200	14200	10800	15200	26400	16400	27200	34600											535	56.8	142	108	152	264	164	272	346
536	5290	16700	13700	10300	14800	25600	15700	26800	33700											536	52.9	137	103	148	256	157	268	337
537	5320	16300	13500	10200	14500	25100	15600	25600	32900											537	53.2	135	102	145	251	156	256	329
538	5270	15900	13600	9950	14300	24700	15100	25300	32100											538	52.7	136	99.5	143	247	151	253	321
539	5140	15400	12700	9820	13900	24200	14600	24400	31200											539	51.4	127	98.2	139	242	146	244	312
540	4920	15300	13100	9490	13500	23700	14600	24200	30600											540	49.2	131	94.9	135	237	146	242	306
541	5090	14900	12300	9280	13600	23000	14200	23500	29600											541	50.9	123	92.8	136	230	142	235	296
542	4970	14700	12500	9220	13200	22800	13800	22500	28700											542	49.7	125	92.2	132	228	138	225	287
543	4710	14100	11800	9100	12900	22200	13200	22500	28400											543	47.1	118	91	129	222	132	225	284
544	4760	14000	11900	8820	12900	21800	13200	22100	27800											544	47.6	119	88.2	129	218	132	221	278
545	4570	13700	11500	8900	12400	21100	13100	20800	27100											545	45.7	115	89	124	211	131	208	271
546	4570	13500	11300	8450	12100	20500	12600	20900	26900											546	45.7	113	84.5	121	205	126	209	269
547	4450	13300	11100	8240	12200	19700	12200	20100	25700											547	44.5	111	82.4	122	197	122	201	257
548	4340	13100	10800	8390	11700	19600	12400	19800	25300											548	43.4	108	83.9	117	196	124	198	253
549	4300	12400	11000	8200	11400	19400	11600	19000	24300											549	43	110	82	114	194	116	190	243
550	4220	12400	10600	7560	11400	18900	11700	19100	23800											550	42.2	106	75.6	114	189	117	191	238
551	4120	12200	10700	7860	11000	18300	11500	18600	23200											551	41.2	107	78.6	110	183	115	186	232
552	3980	11800	10100	7460	10700	17900	11300	17800	22900											552	39.8	101	74.6	107	179	113	178	229
553	3910	11700	10100	7560	10700	17500	10900	17700	22000											553	39.1	101	75.6	107	175	109	177	220
554	3900	11300	9790	7250	10300	16900	10700	17100	21800											554	39	97.9	72.5	103	169	107	171	218
555	3760	11200	9460	6920	10300	16900	10600	17000	21200											555	37.6	94.6	69.2	103	169	106	170	212
556	3670	11000	9360	6830	9890	16500	9980	16400	20600											556	36.7	93.6	68.3	98.9	165	99.8	164	206
557	3760	10700	9180	6790	9700	16100	10100	16000	20000											557	37.6	91.8	67.9	97	161	101	160	200
558	3560	10100	9130	6820	9730	15800	9530	15900	19400											558	35.6	91.3	68.2	97.3	158	95.3	159	194
559	3510	10200	8860	6410	9320	15200	9580	15000	19400											559	35.1	88.6	64.1	93.2	152	95.8	150	194
560	3460	10200	8740	6250	9300	14900	9520	15000	18400											560	34.6	87.4	62.5	93	149	95.2	150	184
561	3390	9730	8520	6400	8880	14600	9130	14700	18100											561	33.9	85.2	64	88.8	146	91.3	147	181
562	3380	9550	8390	6040	8780	14800	9350	14400	17900											562	33.8	83.9	60.4	87.8	148	93.5	144	179
563	3300	9270	8280	6010	8980	14200	8840	14100	17600											563	33	82.8	60.1	89.8	142	88.4	141	176
564	3350	9520	8760	5970	8870	13800	8860	14000	17700											564	33.5	87.6	59.7	88.7	138	88.6	140	177
565	3340	9540	8460	5860	9090	13800	8680	13800	17600											565	33.4	84.6	58.6	90.9	138	86.8	138	176
566	3300	9040	8490	5940	9000	13600	8770	13800	17600											566	33	84.9	59.4	90	136	87.7	138	176
567	3660	9000	8740	5850	9050	13000	8590	13200	17000											567	36.6	87.4	58.5	90.5	130	85.9	132	170
568	3360	8900	8400	5540	8740	12500	8590	13300	16700											568	33.6	84	55.4	87.4	125	85.9	133	167
569	3110	8310	7570	5530	8410	12500	7900	12600	15800											569	31.1	75.7	55.3	84.1	125	79	126	158
570	3110	8180	7490	5370	7790	12100	7810	12200	15400											570	31.1	74.9	53.7	77.9	121	78.1	122	154
571	2780	7880	7130	5340	7440	11600	7410	12000	14300											571	27.8	71.3	53.4	74.4	116	74.1	120	143
572	2770	7780	7180	5010	7380	11700	7250	11400	14200											572	27.7	71.8	50.1	73.8	117	72.5	114	142
573	2760	7640	6620	4860	6900	11100	7110	11200	13700											573	27.6	66.2	48.6	69	111	71.1	112	137
574	2680	7590	6690	4860	7030	10800	6720	10800	13600											574	26.8	66.9	48.6	70.3	108	67.2	108	136
575	2590	7570	6430	4740	7360	10700	6650	10700	13100											575	25.9	64.3	47.4	73.6	107	66.5	107	131
576	2430	7200	6450	4550	6690	10400	6790	10600	12900											576	24.3	64.5	45.5	66.9	104	67.9	106	129
577	2560	6950	6120	4470	6550	10200	6600	10200	12400											577	25.6	61.2	44.7	65.5	102	66	102	124
578	2560	6800	6060	4250	6450	9740	6350	10000	12400											578	25.6	60.6	42.5	64.5	97.4	63.5	100	124
579	2290	6650	6140	4410	6300	9880	5920	9660	11900											579	22.9	61.4	44.1	63	98.8	59.2	96.6	119
580	2340	6410	5820	4260	6260	9420	5900	9400	11700											580	23.4	58.2	42.6	62.6	94.2	59	94	117
581	2420	6540	5870	4140	6090	9290	5810	9260	11400											581	24.2	58.7	41.4	60.9	92.9	58.1	92.6	114
582	2170	6130	5890	3940	5930	8810	5990	8960	10900											582	21.7	58.9	39.4	59.3	88.1	59.9	89.6	109
583	2370	6040	5520	4050	5800	9040	5720	8830	10900											583	23.7	55.2	40.5	58	90.4	57.2	88.3	109
584	2210	5990	5500	3860	5750	8550	5800	8800	10400											584	22.1	55	38.6	57.5	85.5	58	88	104
585	2160	5920	5540	3820	5520	8520	5360	8680	10600											585	21.6	55.4	38.2	55.2	85.2	53.6	86.8	106
586	2040	5800	5370	3750	5670	8130	5330	8350	10000											586	20.4	53.7	37.5	56.7	81.3	53.3	83.5	100
587	1940	5490	5080	3550	5190	7960	5320	8240	10200											587	19.4	50.8	35.5	51.9	79.6	53.2	82.4	102
588	2110	5610	5110	3560	5300	8030	5190	8150	9820											588	21.1	51.1	35.6	53	80.3	51.9	81.5	98.2
589	2160	5700	5020	3350	4930	7500	4870	7640	9550											589	21.6	50.2	33.5	49.3	75	48.7	76.4	95.5
590	2070	5340	5140	3360	5350	7550	5090	7640	9400											590	20.7	51.4	33.6	53.5	75.5	50.9	76.4	94
591	2000	5250	4810	3290	4910	7380	4980	7580	9230											591	20	48.1	32.9	49.1	73.8	49.8	75.8	92.3
592	1840	5190	4780	3400	4990	7730	4710	7150	8960											592	18.4	47.8	34	49.9	77.3	47.1	71.5	89.6
593	1960	5090	4660	3260	4790	7070	4550	7080	8870											593	19.6	46.6	32.6	47.9	70.7	45.5	70.8	88.7
594	1830	5140	4570	3270	4860	7040	4560	6920	8680											594	18.3	45.7	32.7	48.6	70.4	45.6	69.2	86.8
595	1730	4880	4320	3190	4480	6810	4380	6820	8340											595	17.3	43.2	31.9	44.8	68.1	43.8	68.2	83.4
596	1830	4610	4420	3210	4700	6660	4100	6680	7950											596	18.3	44.2	32.1	47	66.6	41	66.8	79.5
597	1670	4510	4390	2820	4340	6600	4350	6220	7810											597	16.7	43.9	28.2	43.4	66	43.5	62.2	78.1
598	1710	4600	4290	2960	4460	6760	4310	6530	7640											598	17.1	42.9	29.6	44.6	67.6	43.1	65.3	76.4
599	1650	4500	4270	2920	4370	6340	3800	6380	7600											599	16.5	42.7	29.2	43.7	63.4	38	63.8	76
600	1550	4430	3990	2680	4250	6020	3880	6060	7370											600	15.5	39.9	26.8	42.5	60.2	38.8	60.6	73.7
601	1550	4210	4080	2670	4090	5920	3940	5840	7400											601	15.5	40.8	26.7	40.9	59.2	39.4	58.4	74
602	1590	4030	4030	2710	4000	6120	3660	5910	7350											602	15.9	40.3	27.1	40	61.2	36.6	59.1	73.5
603	1570	4130	3870	2770	3850	5710	3660	5820	6780											603	15.7	38.7	27.7	38.5	57.1	36.6	58.2	67.8
604	1480	4000	3610	2490	4000	5540	3680	5510	6730											604	14.8	36.1	24.9	40	55.4	36.8	55.1	67.3
605	1490	3860	3600	2480	3910	5610	3640	5450	6870											605	14.9	36	24.8	39.1	56.1	36.4	54.5	68.7
606	1460	3820	3770	2310	3590	5330	3350	5260	6400											606	14.6	37.7	23.1	35.9	53.3	33.5	52.6	64
607	1450	3900	3780	2410	4080	5180	3260	5320	6430											607	14.5	37.8	24.1	40.8	51.8	32.6	53.2	64.3
608	1360	3610	3510	2380	3940	5270	3370	5150	6130											608	13.6	35.1	23.8	39.4	52.7	33.7	51.5	61.3
609	1490	3690	3500	2280	3590	4980	3290	5020	6410											609	14.9	35	22.8	35.9	49.8	32.9	50.2	64.1
610	1490	3640	3410	2210	3380	5090	3360	4880	6050											610	14.9	34.1	22.1	33.8	50.9	33.6	48.8	60.5
611	1510	3380	3410	2230	3720	4710	3280	5000	6050											611	15.1	34.1	22.3	37.2	47.1	32.8	50	60.5
612	1240	3390	3400	2170	3420	4610	3060	4880	5680											612	12.4	34	21.7	34.2	46.1	30.6	48.8	56.8
613	1350	3030	3300	2200	3500	4490	3090	4680	5630											613	13.5	33	22	35	44.9	30.9	46.8	56.3
614	1350	3180	3290	2220	3400	4500	3090	4590	5530											614	13.5	32.9	22.2	34	45	30.9	45.9	55.3
615	1410	3220	3360	2100	3140	4320	2980	4490	5340											615	14.1	33.6	21	31.4	43.2	29.8	44.9	53.4
616	1330	3210	3300	2050	3450	4540	3130	4510	5450											616	13.3	33	20.5	34.5	45.4	31.3	45.1	54.5
617	1550	3130	3200	2060	3380	4280	2920	4620	5400											617	15.5	32	20.6	33.8	42.8	29.2	46.2	54
618	1430	2990	3150	2130	3320	4440	2980	4560	5160											618	14.3	31.5	21.3	33.2	44.4	29.8	45.6	51.6
619	1160	3080	3210	1960	3260	4250	2760	4240	5300											619	11.6	32.1	19.6	32.6	42.5	27.6	42.4	53
620	1130	3000	3190	1750	3310	4130	2890	4410	5080											620	11.3	31.9	17.5	33.1	41.3	28.9	44.1	50.8
621	1340	2830	3090	1950	2920	3840	2720	4300	4900											621	13.4	30.9	19.5	29.2	38.4	27.2	43	49
622	1250	2750	2940	1790	3120	3910	2560	4070	4770											622	12.5	29.4	17.9	31.2	39.1	25.6	40.7	47.7
623	1150	2720	2910	1820	3130	3670	2540	3820	4480											623	11.5	29.1	18.2	31.3	36.7	25.4	38.2	44.8
624	1150	2660	2860	1780	2880	3520	2600	3690	4430											624	11.5	28.6	17.8	28.8	35.2	26	36.9	44.3
625	1070	2810	2740	1710	2900	3620	2510	3690	4580											625	10.7	27.4	17.1	29	36.2	25.1	36.9	45.8
626	1210	2520	2820	1750	2920	3580	2540	3810	4500											626	12.1	28.2	17.5	29.2	35.8	25.4	38.1	45
627	1110	2570	2540	1870	2760	3500	2310	3590	4390											627	11.1	25.4	18.7	27.6	35	23.1	35.9	43.9
628	1070	2450	2610	1590	2660	3450	2510	3610	4330											628	10.7	26.1	15.9	26.6	34.5	25.1	36.1	43.3
629	1100	2460	2380	1430	2680	3230	2270	3480	4180											629	11	23.8	14.3	26.8	32.3	22.7	34.8	41.8
630	1070	2480	2470	1480	2510	3430	2340	3400	4150											630	10.7	24.7	14.8	25.1	34.3	23.4	34	41.5
631	945	2260	2460	1540	2590	3130	2390	3510	4120											631	9.45	24.6	15.4	25.9	31.3	23.9	35.1	41.2
632	1080	2250	2760	1510	2650	3060	2310	3480	4110											632	10.8	27.6	15.1	26.5	30.6	23.1	34.8	41.1
633	1140	2170	2340	1460	2570	3030	2230	3330	3960											633	11.4	23.4	14.6	25.7	30.3	22.3	33.3	39.6
634	1070	2360	2600	1480	2390	2950	2140	3270	3770											634	10.7	26	14.8	23.9	29.5	21.4	32.7	37.7
635	1070	2290	2510	1620	2480	3150	2150	3080	3800											635	10.7	25.1	16.2	24.8	31.5	21.5	30.8	38
636	832	2000	2320	1480	2480	3000	2060	3290	3750											636	8.32	23.2	14.8	24.8	30	20.6	32.9	37.5
637	907	2130	2360	1360	2560	2950	1990	3050	3620											637	9.07	23.6	13.6	25.6	29.5	19.9	30.5	36.2
638	944	2030	2410	1490	2550	3030	1950	2880	3880											638	9.44	24.1	14.9	25.5	30.3	19.5	28.8	38.8
639	1110	2030	2210	1380	2330	2880	2160	2920	3790											639	11.1	22.1	13.8	23.3	28.8	21.6	29.2	37.9
640	935	1970	2380	1350	2410	2620	1930	3000	3750											640	9.35	23.8	13.5	24.1	26.2	19.3	30	37.5
641	934	2200	2260	1490	2380	2670	1940	2980	3400											641	9.34	22.6	14.9	23.8	26.7	19.4	29.8	34
642	1050	1960	2140	1320	2270	2720	1990	3100	3740											642	10.5	21.4	13.2	22.7	27.2	19.9	31	37.4
643	943	2040	2450	1380	2610	2700	2080	3160	3860											643	9.43	24.5	13.8	26.1	27	20.8	31.6	38.6
644	1040	2270	2820	1440	3050	2720	2190	3250	3910											644	10.4	28.2	14.4	30.5	27.2	21.9	32.5	39.1
645	1450	2430	3530	1540	3390	2780	2460	3660	4720											645	14.5	35.3	15.4	33.9	27.8	24.6	36.6	47.2
646	1690	2490	3970	1690	4390	3270	2980	4280	5370											646	16.9	39.7	16.9	43.9	32.7	29.8	42.8	53.7
647	2000	2890	5350	1980	5130	3860	3640	5350	6310											647	20	53.5	19.8	51.3	38.6	36.4	53.5	63.1
648	2510	3140	5890	2030	6130	4050	4030	6010	7420											648	25.1	58.9	20.3	61.3	40.5	40.3	60.1	74.2
649	2950	3260	6350	2260	6360	4390	4470	6410	8310											649	29.5	63.5	22.6	63.6	43.9	44.7	64.1	83.1
650	3170	3450	5740	2260	6270	4080	4500	6440	7690											650	31.7	57.4	22.6	62.7	40.8	45	64.4	76.9
651	2460	3140	5410	2160	5490	3770	4050	5510	7380											651	24.6	54.1	21.6	54.9	37.7	40.5	55.1	73.8
652	1950	2800	4280	1810	4720	3130	3620	4850	6260											652	19.5	42.8	18.1	47.2	31.3	36.2	48.5	62.6
653	1740	2360	3410	1420	3860	2730	2750	3950	5130											653	17.4	34.1	14.2	38.6	27.3	27.5	39.5	51.3
654	1260	2090	2910	1190	2940	2650	2180	3120	4170											654	12.6	29.1	11.9	29.4	26.5	21.8	31.2	41.7
655	1030	1900	2490	1080	2570	2310	1990	2920	3540											655	10.3	24.9	10.8	25.7	23.1	19.9	29.2	35.4
656	987	1640	2190	1060	2210	2130	1850	2730	3040											656	9.87	21.9	10.6	22.1	21.3	18.5	27.3	30.4
657	823	1760	2150	1090	2110	1970	1720	2370	2820											657	8.23	21.5	10.9	21.1	19.7	17.2	23.7	28.2
658	868	1670	2080	1220	2070	2120	1600	2480	3050											658	8.68	20.8	12.2	20.7	21.2	16	24.8	30.5
659	899	1580	2260	1080	2220	2080	1740	2480	2960											659	8.99	22.6	10.8	22.2	20.8	17.4	24.8	29.6
660	851	1620	1850	1120	2050	1880	1580	2370	3080											660	8.51	18.5	11.2	20.5	18.8	15.8	23.7	30.8
661	860	1430	2100	986	2200	2120	1580	2370	2970											661	8.6	21	9.86	22	21.2	15.8	23.7	29.7
662	838	1540	2110	1100	2000	2100	1680	2330	2960											662	8.38	21.1	11	20	21	16.8	23.3	29.6
663	688	1640	1970	857	2120	1890	1650	2430	3000											663	6.88	19.7	8.57	21.2	18.9	16.5	24.3	30
664	970	1540	2050	987	1950	1860	1640	2380	2740											664	9.7	20.5	9.87	19.5	18.6	16.4	23.8	27.4
665	880	1380	1990	897	1910	1720	1610	2160	2930											665	8.8	19.9	8.97	19.1	17.2	16.1	21.6	29.3
666	788	1480	2090	1090	1990	1790	1620	2510	2840											666	7.88	20.9	10.9	19.9	17.9	16.2	25.1	28.4
667	866	1350	1930	1050	2020	1830	1610	2230	2810											667	8.66	19.3	10.5	20.2	18.3	16.1	22.3	28.1
668	1090	1490	2170	893	2030	1750	1540	2370	2880											668	10.9	21.7	8.93	20.3	17.5	15.4	23.7	28.8
669	982	1490	2250	863	2060	1790	1850	2330	2960											669	9.82	22.5	8.63	20.6	17.9	18.5	23.3	29.6
670	917	1460	2150	746	2100	2000	1620	2240	2820											670	9.17	21.5	7.46	21	20	16.2	22.4	28.2
671	869	1540	2110	1010	2140	1690	1880	2340	3070											671	8.69	21.1	10.1	21.4	16.9	18.8	23.4	30.7
672	960	1550	1930	941	2130	1890	1650	2190	2730											672	9.6	19.3	9.41	21.3	18.9	16.5	21.9	27.3
673	886	1320	2280	980	2150	1680	1530	2570	3040											673	8.86	22.8	9.8	21.5	16.8	15.3	25.7	30.4
674	822	1330	2360	935	2450	1920	1760	2400	2920											674	8.22	23.6	9.35	24.5	19.2	17.6	24	29.2
675	928	1290	2300	1020	2470	1920	1390	2610	3070											675	9.28	23	10.2	24.7	19.2	13.9	26.1	30.7
676	1080	1630	2260	848	2410	1740	1580	2490	2750											676	10.8	22.6	8.48	24.1	17.4	15.8	24.9	27.5
677	946	1370	2190	859	2040	1910	1550	2320	2770											677	9.46	21.9	8.59	20.4	19.1	15.5	23.2	27.7
678	947	1460	1990	993	2290	1590	1370	2400	3150											678	9.47	19.9	9.93	22.9	15.9	13.7	24	31.5
679	961	1460	2520	933	2250	1710	1720	2450	2830											679	9.61	25.2	9.33	22.5	17.1	17.2	24.5	28.3
680	335	797	862	452	844	1100	627	846	1330											680	3.35	8.62	4.52	8.44	11	6.27	8.46	13.3
681	382	652	801	459	662	1000	586	807	983											681	3.82	8.01	4.59	6.62	10	5.86	8.07	9.83
682	316	819	637	414	759	1180	703	921	1120											682	3.16	6.37	4.14	7.59	11.8	7.03	9.21	11.2
683	255	758	728	554	585	1160	616	919	956											683	2.55	7.28	5.54	5.85	11.6	6.16	9.19	9.56
684	236	828	738	569	676	947	632	947	925											684	2.36	7.38	5.69	6.76	9.47	6.32	9.47	9.25
685	337	705	787	516	822	924	733	855	1130											685	3.37	7.87	5.16	8.22	9.24	7.33	8.55	11.3
686	349	631	611	423	764	720	627	960	991											686	3.49	6.11	4.23	7.64	7.2	6.27	9.6	9.91
687	223	601	542	414	696	1110	589	715	815											687	2.23	5.42	4.14	6.96	11.1	5.89	7.15	8.15
688	281	625	582	506	595	851	509	812	794											688	2.81	5.82	5.06	5.95	8.51	5.09	8.12	7.94
689	230	690	574	361	660	1070	637	782	854											689	2.3	5.74	3.61	6.6	10.7	6.37	7.82	8.54
690	305	668	517	317	588	884	671	670	868											690	3.05	5.17	3.17	5.88	8.84	6.71	6.7	8.68
691	236	661	591	404	787	713	598	847	1040											691	2.36	5.91	4.04	7.87	7.13	5.98	8.47	10.4
692	223	580	633	402	564	816	582	784	843											692	2.23	6.33	4.02	5.64	8.16	5.82	7.84	8.43
693	269	589	574	400	666	640	591	795	788											693	2.69	5.74	4	6.66	6.4	5.91	7.95	7.88
694	315	691	538	484	519	719	495	702	877											694	3.15	5.38	4.84	5.19	7.19	4.95	7.02	8.77
695	268	649	414	350	509	668	476	739	783											695	2.68	4.14	3.5	5.09	6.68	4.76	7.39	7.83
696	298	536	634	382	669	883	367	804	839											696	2.98	6.34	3.82	6.69	8.83	3.67	8.04	8.39
697	169	695	526	477	516	770	463	788	906											697	1.69	5.26	4.77	5.16	7.7	4.63	7.88	9.06
698	253	443	608	302	532	727	525	727	717											698	2.53	6.08	3.02	5.32	7.27	5.25	7.27	7.17
699	247	523	570	390	382	781	523	766	709											699	2.47	5.7	3.9	3.82	7.81	5.23	7.66	7.09
700	269	521	512	301	568	660	379	654	701											700	2.69	5.12	3.01	5.68	6.6	3.79	6.54	7.01
