# Supplementary material for: Daptomycin forms a stable complex with phosphatidylglycerol for selective uptake to bacterial membrane
Source: eLife. 2025 Jun 2;13:RP93267. doi: 10.7554/eLife.93267 (PMC12129450; doi:10.7554/eLife.93267)
Supplement: Figure 2—source data 1. [file elife-93267-fig2-data1.xlsx]

## Sheet: Multi Scans KIN
Multi Scans KIN
Labels	CONTROL 9 KIN	8 KIN	7 KIN	6 KIN	5 KIN	4 KIN	3 KIN	2 KIN	1 KIN
Type	Kinetic Scan	Kinetic Scan	Kinetic Scan	Kinetic Scan	Kinetic Scan	Kinetic Scan	Kinetic Scan	Kinetic Scan	Kinetic Scan
Comment
Start	0	0	0	0	0	0	0	0	0
Stop	600000000000	600000000000	600000000000	600000000000	600000000000	600000000000	600000000000	600000000000	600000000000
Step	1000000000	1000000000	1000000000	1000000000	1000000000	1000000000	1000000000	1000000000	1000000000
Fixed/Offset
XAxis	Time(ns)	Time(ns)	Time(ns)	Time(ns)	Time(ns)	Time(ns)	Time(ns)	Time(ns)	Time(ns)
YAxis	Counts	Counts	Counts	Counts	Counts	Counts	Counts	Counts	Counts
0	20189.7	21889.5	26871.4	28338.8	34176.5	46583	67833.8	105202	92652.2
1000000000	20211.9	21876.2	27033.2	28369.6	34412.5	46719.8	68798.4	107565	94595.2
2000000000	20105.3	21964.9	26900.9	28511.1	34523.2	47053.1	69968.1	109855	96706.9
3000000000	20114.2	21786.1	27012.7	28580.4	34624.8	47497.2	70793.7	112540	98871.1
4000000000	20183.6	21941.3	26963.9	28592	34827.2	47850.8	71722.7	114537	100766
5000000000	20202.8	21829.1	27046.3	28689.5	34982.6	48054.4	72785.8	116975	102775
6000000000	20241.2	21916.8	27006.5	28720.8	35091.4	48413.4	73628.8	119428	104888
7000000000	20209.9	21849.2	27052.8	28919.6	35198.9	48820.5	74612.8	121865	106894
8000000000	20364.4	21929.4	27095.3	28962.3	35299.3	49004.3	75622.9	124078	109176
9000000000	20208.3	21992.2	27106.5	28991.8	35554.6	49458.2	76606.4	126548	111148
10000000000	20171.5	21902.5	27175.1	29067.8	35634	49626.1	77374.3	128986	113000
11000000000	20160.3	21910.3	27209.5	29236.9	35722.7	50091.2	78398.1	131183	114875
12000000000	20203.6	21911.5	27126.2	29084.7	35851	50312.1	79571.5	133765	117134
13000000000	20253.2	21859.6	27078.8	29232.5	35976.3	50835.7	80348	136153	118937
14000000000	20292.7	21881.8	27243.3	29320.5	36039.1	51123.5	81186.6	138322	120886
15000000000	20164	21894.1	27291.7	29303	36372.7	51359.6	81994.2	140645	122859
16000000000	20302.3	21949.3	27203.1	29428.3	36286.3	51878.2	83377.3	143132	124894
17000000000	20301.6	21893.1	27258.7	29398.9	36518.4	52168.1	84262.7	145455	126856
18000000000	20309.4	21929.4	27285.5	29574.4	36519.4	52635.2	85385.5	147524	128967
19000000000	20225.8	21876.2	27364.1	29609.9	36833.5	52980.8	86268.9	149807	130677
20000000000	20255.4	21986.4	27459.6	29716	36738.3	53510.2	87132.8	152140	132726
21000000000	20240.4	21947.8	27310	29661.1	36946.5	53920	88164.7	154529	134606
22000000000	20353	22045.3	27390.8	29752.1	36954.6	54094.8	89348.9	156581	136582
23000000000	20330	21996.7	27362.7	29744.6	37006.2	54696	90470.1	158788	138459
24000000000	20300.8	21990.9	27393	29836.3	37301.5	55183.8	91392.6	161239	140426
25000000000	20267.2	21950.5	27416.1	29981.1	37238	55427.7	92671.4	163281	142183
26000000000	20280.8	22018.5	27467.8	30083.2	37433.2	55940.9	93544.4	165616	143919
27000000000	20245.8	22015.5	27509.2	30008.7	37510.6	56541.4	94365.2	167766	146062
28000000000	20320.3	21988	27452.9	30070.6	37519.5	56871.1	95634.9	169887	147774
29000000000	20336.3	21971.4	27577.1	30184.9	37740.4	57235.2	96730.2	171926	149482
30000000000	20303.1	22099.2	27571.3	30285.3	37822.8	57657.8	97814	174049	151418
31000000000	20370.7	22004.5	27637.8	30331.3	37863.8	58297.6	98950	176362	153403
32000000000	20413.1	22153.6	27461.6	30281.6	37971.6	58725.8	99979.6	178196	155095
33000000000	20228.6	22051.4	27560.9	30423	38178.9	59115.8	101106	180294	156866
34000000000	20407.1	22086.8	27489.5	30527.3	38282.4	59417.8	101862	182342	158807
35000000000	20440.6	22011.3	27692.6	30555.3	38343.6	60030.3	103032	184258	160433
36000000000	20336.6	22139	27616.5	30606	38338.4	60374.8	104382	186531	162362
37000000000	20254.3	22085.2	27688.7	30551.7	38539.7	60769.9	105467	188493	163994
38000000000	20302.6	22047.9	27687.1	30735.2	38578.1	61407.7	106509	190209	165645
39000000000	20373.4	22164.1	27668.9	30709.2	38743.5	61824.3	107703	192402	167471
40000000000	20379.5	22021.7	27614.9	30816.2	38842.1	62290.6	108746	194007	169282
41000000000	20403.7	22162.8	27636.9	30937.5	38858.8	62751.9	109895	196029	170660
42000000000	20288.1	22161.1	27681.8	30843.8	39002.7	63128.3	110825	198000	172283
43000000000	20227.9	22099.5	27845.7	30900.4	39053.5	63656.3	112130	199348	174488
44000000000	20323.7	22077.7	27769.7	30959.2	39046.1	64151.1	113107	201623	175756
45000000000	20412.7	22070.3	27755.4	30999.3	39240.9	64566.1	114321	203224	177521
46000000000	20360.3	22126	27763.6	31060.8	39229.2	64951.5	115282	204931	179126
47000000000	20344	22140.7	27801.5	31105.5	39266	65352.6	116572	206739	180831
48000000000	20279.2	22183.1	27819.9	31176.1	39584.7	65878.6	117512	208485	182246
49000000000	20377	22069.7	27813.8	31191.1	39532.8	66363.9	118923	209964	183819
50000000000	20357.1	22199.4	27923.7	31329.3	39704.4	66714.5	119827	211692	185688
51000000000	20391.8	22104.2	27950.4	31366.8	39750.4	67141.2	120933	213323	186950
52000000000	20407.8	22156.7	27782.2	31350.3	39837.7	67682.4	121721	215111	188902
53000000000	20319.3	22284.1	27957.7	31332.2	39988.2	68160.2	123017	216509	190272
54000000000	20273	22228.1	27934.3	31636.6	40047.9	68542.2	124306	218259	192008
55000000000	20393.4	22133.7	27979.4	31487.4	40124.8	68925.3	125277	219574	193371
56000000000	20395	22167.7	27871	31512.9	40101.8	69399.7	126257	221015	194971
57000000000	20420.3	22155.1	27954.7	31646.1	40379.1	69726.8	127462	222486	196569
58000000000	20325	22265.9	28002.2	31654.9	40388.3	70286.8	128447	224006	197995
59000000000	20275.1	22205.9	27901.2	31740.2	40504.1	70872.7	129665	225205	199293
60000000000	20379.1	22240.9	27952.9	31820.8	40566.2	71108.2	130685	227021	200985
61000000000	20377.4	22200.9	27951.2	31823.6	40737.5	71412.8	131745	228300	202260
62000000000	20391.4	22164	28083.2	31821.1	40723.3	72005.4	132807	230254	204116
63000000000	20310.3	22234.1	27972	31966.5	40788	72507.9	133612	231202	205566
64000000000	20378.5	22314.5	28077.6	31995.1	40848.7	72816.1	134726	232611	206795
65000000000	20328.6	22253.3	28206.3	32035.9	40866.3	73202.9	135686	234145	207993
66000000000	20441.9	22213.3	28088.6	31978.1	40953.8	73934.6	136933	235062	209751
67000000000	20387.6	22214.7	27985.1	32095.9	41207.5	74198.8	137911	236613	210953
68000000000	20379	22216.5	28052.9	32086.3	41153.8	74756.5	138622	237652	212142
69000000000	20393.8	22200	28155.4	32217.1	41318	74882.9	139545	239316	214171
70000000000	20363.8	22233.1	28132.9	32272	41343.5	75581.9	140560	240445	215094
71000000000	20401.7	22245.9	28122.9	32307.1	41414.9	76033.8	141616	241553	216833
72000000000	20383.2	22259.6	28055.4	32254.7	41358.7	76382.4	142701	243200	218139
73000000000	20319.5	22284.8	28236.2	32493.6	41766.6	76836.2	143478	243777	219311
74000000000	20361.6	22291.7	28161.4	32224.9	41708.6	77130.7	144283	245151	220600
75000000000	20379	22233.4	28171.7	32383.9	41856.9	77786.8	145447	246423	221975
76000000000	20414.4	22318	28251.1	32423.2	41778.1	78041.1	146310	247685	223279
77000000000	20345.9	22314.3	28170.4	32549.9	41900	78684.8	147148	248849	224598
78000000000	20404.5	22225	28283.7	32645.7	42152.2	78916	148309	249824	226263
79000000000	20467.2	22295.8	28298.1	32591	42136.9	79494.2	148940	250886	227340
80000000000	20481.2	22281.6	28280.3	32670	42197.2	79692.5	149852	252118	228577
81000000000	20461	22363.2	28204.9	32678.1	42284.1	80145.2	150808	252985	229923
82000000000	20346.5	22295.4	28279	32741	42277.8	80580.5	151848	253935	230873
83000000000	20338.4	22327.2	28353.7	32832.3	42453.5	81050.4	152775	254963	231896
84000000000	20312.1	22301.5	28445.3	32827.2	42488	81558	153452	255903	233563
85000000000	20454.4	22334	28346.3	32877.4	42573.3	81778.9	154488	257232	234686
86000000000	20479.4	22185.7	28315.7	32814.6	42669.3	82519.8	155359	257799	236013
87000000000	20396.5	22361.4	28539	32923.9	42835.5	82820.8	156358	258942	237089
88000000000	20401.5	22301.9	28454.3	32976.6	42877.9	83208.8	157011	260044	238196
89000000000	20455.3	22425.6	28483.3	33067.8	43084	83346.7	157950	260578	239660
90000000000	20346.6	22344.2	28421.1	33116.1	43020.6	84025.8	158623	261686	240360
91000000000	20431	22358.7	28419	33205.1	43168.4	84511.1	159446	262765	242080
92000000000	20463.4	22324.6	28405.9	33184.4	43328.2	84915.1	160276	263698	243043
93000000000	20389.3	22331	28330.3	33163.9	43405.8	85323.6	160873	264352	244039
94000000000	20397.4	22439	28515.1	33329.6	43358	85788.2	161944	265294	245104
95000000000	20415.2	22341	28406.7	33316.3	43577.4	85952.6	162599	266027	246185
96000000000	20389.2	22348.9	28595.9	33228.7	43602.2	86538.4	163468	267030	247506
97000000000	20392.3	22309.1	28486.9	33379.4	43644.7	86975.4	164236	268092	248402
98000000000	20464.3	22356.3	28419.8	33390.8	43621.3	87406.1	165052	268694	249625
99000000000	20399.7	22304.8	28581	33424	43784.7	87716.8	165787	269936	250941
100000000000	20353	22423	28475	33432.7	43998.4	88033.8	166578	270022	251759
101000000000	20411.7	22330.2	28533.7	33422.6	44044.4	88614.8	167206	270888	252997
102000000000	20469	22376.5	28492.1	33488.8	44109.8	88908.5	168065	271760	253715
103000000000	20314.9	22429.2	28559.4	33568.3	44230	89223	168554	272616	255113
104000000000	20497.6	22447	28462.8	33598.5	44386.8	89544	169258	273810	255693
105000000000	20466.4	22378.5	28702.3	33662.4	44330.6	90071.1	170089	274367	257202
106000000000	20421	22500.5	28575.5	33721.1	44386.7	90610.2	170878	274839	257852
107000000000	20387.3	22441.6	28634.4	33786	44531.3	90869.7	171744	275576	259213
108000000000	20379.4	22419.8	28641	33824.2	44660.2	91223.1	172278	276144	259976
109000000000	20474	22339.1	28605.5	33782.4	44649	91689.8	173012	276968	260875
110000000000	20416.8	22290.2	28626.5	33843.2	44903.5	92316.9	173676	277726	261910
111000000000	20516.7	22391.6	28822	33800.4	44870.8	92542	174520	278634	262492
112000000000	20465.9	22448.8	28576.2	33934	44924.5	92949.3	175021	279017	263840
113000000000	20456.2	22352.5	28693.8	33909.6	45084.1	93389.9	175663	279714	264765
114000000000	20357.4	22422.3	28699.7	33979.8	45213.5	93873.8	176684	280522	265541
115000000000	20392.3	22476.4	28751.2	33916.7	45357.1	93949.6	177201	280822	266411
116000000000	20410.1	22434.9	28681.7	34091.7	45408	94219.7	177802	281573	267787
117000000000	20450.2	22492.6	28728.4	34150.6	45524.6	94736.4	178192	282550	268484
118000000000	20380.6	22443.9	28727.5	34031.8	45568.7	95286.6	178967	282661	269226
119000000000	20381.9	22475.2	28821.7	34171.8	45713.6	95690.5	179699	283386	270144
120000000000	20379	22452.6	28823.7	34259.1	45757.5	95896.8	180308	284035	270814
121000000000	20392.7	22407.4	28740.6	34202.8	45822.2	96275.3	180877	284615	271655
122000000000	20389.9	22352.4	28759.7	34165.3	45856.6	96634.8	181476	285184	273016
123000000000	20399.2	22396.6	28803.1	34279.7	45967.2	97218.1	182185	285766	273509
124000000000	20385.5	22420.4	28774.7	34370.2	46065.7	97657.4	182866	286325	274290
125000000000	20388.8	22415.8	28773.9	34191.5	46100.3	97774.3	183517	287236	275263
126000000000	20348.7	22434.2	28906.6	34217.7	46242.7	98291.2	183798	287334	276339
127000000000	20379	22485.4	28805.5	34428.2	46351.1	98454.8	184586	287965	276913
128000000000	20413	22523.2	28779.7	34399.9	46421.2	99022.2	184987	288922	277681
129000000000	20405.8	22489.3	28805.8	34467.8	46588.9	99414.3	185704	288865	278189
130000000000	20494.1	22461.5	28857.4	34585.3	46595.2	99725	186254	289715	279577
131000000000	20443.8	22607.3	28860.4	34650.1	46833.8	100019	186940	289978	279532
132000000000	20410.8	22463.2	28888.4	34531	46856.2	100402	187424	290654	280944
133000000000	20392.4	22531.7	28869	34594.9	46968.4	100917	188027	291151	281494
134000000000	20458.1	22548.8	28809.7	34656.1	47055.7	101145	188686	291659	282367
135000000000	20382.7	22428.2	28921.7	34648.2	47053.8	101572	189079	291982	283011
136000000000	20357.1	22489	28973.7	34748.4	47201.7	101759	189560	292288	283601
137000000000	20347.2	22472.5	28930	34714.2	47292.3	102147	190152	293077	284357
138000000000	20305.7	22537.2	28807.9	34713	47449.1	102533	190647	293887	284982
139000000000	20465.4	22419.6	28959	34686.2	47467.9	102871	191250	293871	285794
140000000000	20420.5	22452.7	28976.6	34825.1	47558.3	103263	191828	294416	286451
141000000000	20534.5	22475.4	29003.2	34841.5	47735.5	103422	192393	295099	286844
142000000000	20403.8	22590.1	29007.6	34835.9	47793.3	103896	192570	295625	287987
143000000000	20556.1	22515.5	28899.1	34930.7	47811.6	104118	193325	295712	288565
144000000000	20372.5	22592.6	28966.1	34863.7	48025.6	104684	193811	296154	289097
145000000000	20463.2	22489.1	28984.9	34924.6	48135.5	105085	194512	296356	289772
146000000000	20481.9	22364.6	28971.5	34981.7	48296	105070	194649	296779	290570
147000000000	20457	22494.7	29061	34979	48214.6	105601	195416	297256	291178
148000000000	20436.6	22412.4	28935.9	35005.7	48316.9	105874	196009	297709	291717
149000000000	20423.8	22455.3	29038.7	34978.1	48413.2	106312	196258	298547	292298
150000000000	20487.8	22509.7	29082.2	35055	48623.4	106399	196606	298427	292919
151000000000	20437.8	22492.2	29010.6	35150.7	48661	106903	197623	298867	293672
152000000000	20500.4	22484.2	29041	35164.3	48742.3	107191	197814	299213	295779
153000000000	20372.1	22535.8	29057.5	35132	48884.9	107612	198313	299808	295862
154000000000	20384.7	22560.7	29085.2	35284.7	48829.1	108035	198674	299868	296730
155000000000	20383.2	22580.7	28997	35134.4	48954.5	108309	199325	300444	297307
156000000000	20505.6	22585.4	29041.7	35223.4	49012.7	108437	199450	300620	297636
157000000000	20439.2	22504.2	29064.8	35449.7	49188.9	108699	200145	300893	297959
158000000000	20429.6	22532.4	29044.1	35240.5	49296.9	109133	200562	301644	298950
159000000000	20431.1	22599.5	29060.2	35304.6	49509.7	109417	200869	301662	299238
160000000000	20346.8	22484.3	29094.5	35327.5	49587	109762	201466	302208	299859
161000000000	20526.7	22471.3	29220.2	35347.3	49458.8	110125	202016	302378	300279
162000000000	20534.4	22486.7	29267.6	35410.9	49612.9	110282	202207	302604	300862
163000000000	20434.1	22534.7	29124.4	35468.2	49945.4	110777	202587	303270	301065
164000000000	20475	22529.7	29077.1	35321.7	49842.9	111007	203206	303668	301376
165000000000	20497.8	22590.9	29148	35501.3	49991.6	111250	203818	303891	302288
166000000000	20470	22587.8	29194.8	35557.4	50073.3	111622	204201	303941	303089
167000000000	20510.8	22509.2	29271.7	35510.4	50014.6	111751	204600	304308	303288
168000000000	20416	22526	29210.7	35510.8	50361.5	112157	205260	304384	303915
169000000000	20471	22547.9	29231.2	35547.4	50379	112408	205279	305005	304297
170000000000	20402.2	22608.3	29251.4	35521.7	50444.2	112837	205821	304913	305110
171000000000	20486.8	22542.5	29210.7	35679.3	50386.9	113142	206092	305373	305498
172000000000	20443.9	22562.6	29121	35614.1	50584	113316	206430	305907	306017
173000000000	20518.3	22563	29271.8	35572	50655.4	113760	207106	306110	306506
174000000000	20538.6	22583.3	29134.5	35750	50634.3	113912	207515	306114	307011
175000000000	20459.2	22570.5	29137	35856.3	50800.7	113949	207774	306497	307181
176000000000	20531.9	22505.5	29213.1	35864.9	50962.1	114482	208444	307022	307342
177000000000	20427	22595.7	29191.9	35793.6	51044.3	114621	208736	306964	307985
178000000000	20422	22567.3	29224.2	35867.2	51136.5	115103	208914	307291	308518
179000000000	20485.2	22574.6	29208.5	35870.2	51052.6	115506	209610	307538	309095
180000000000	20551.9	22514.9	29346.1	35891.4	51471.2	115684	209890	308070	309107
181000000000	20512.4	22593.3	29227.8	35984.5	51355.5	115898	210195	308312	309886
182000000000	20408.4	22633.9	29333.4	35927.1	51629.9	116158	210452	308402	310306
183000000000	20475.5	22658.8	29292.4	36062	51651.9	116349	210646	308588	310306
184000000000	20513.8	22611.5	29331	36090	51695.9	116798	211330	309036	310754
185000000000	20538.3	22477.9	29313	35952.3	51788.7	116988	211632	308806	311657
186000000000	20521.5	22573	29202.1	36101.5	51995.1	117076	212207	309287	311867
187000000000	20496.4	22653.3	29383.4	36031.2	51773.9	117368	212351	309715	312635
188000000000	20575.3	22625.7	29383.4	36052.8	51963.3	117735	212572	309731	313249
189000000000	20551.9	22624.8	29413.8	35996.9	52197.7	117939	213205	309914	313048
190000000000	20446.4	22659.6	29458.2	36106.6	52155.6	118090	213339	310515	313537
191000000000	20473.4	22535.2	29340	36005.3	52250.7	118430	213770	310691	313709
192000000000	20469.1	22718.8	29425.8	36124.7	52287	118792	214156	310483	314136
193000000000	20469.2	22602.4	29319.7	36209.2	52397.9	118912	214565	311130	314453
194000000000	20527.3	22635.8	29442	36322.7	52587.9	119186	215016	311302	314709
195000000000	20427.1	22565.1	29415.7	36215	52792.2	119513	215364	311735	315441
196000000000	20410.5	22599.1	29456.8	36215.9	52748	119790	215363	311635	315500
197000000000	20500.1	22671.6	29380.8	36376.1	52797.7	120077	215825	311658	315831
198000000000	20423.1	22576.7	29366.5	36166	52937	120509	216088	312137	316120
199000000000	20500.8	22542.5	29442.1	36268.4	53141.1	120508	216428	312409	316867
200000000000	20409.3	22459.7	29433.5	36225.5	52979.9	120816	216724	312249	317189
201000000000	20547.5	22679.9	29430.5	36342.5	53082.5	120950	216936	312659	317034
202000000000	20450.9	22626.1	29414.4	36406.6	53112.9	121345	217561	313060	317250
203000000000	20391.2	22535.6	29434.6	36424.7	53267.6	121508	217589	313269	317966
204000000000	20490	22621.1	29523.9	36426.6	53537.4	121783	217834	313304	318092
205000000000	20440.3	22737.2	29414.7	36334.5	53545.8	121755	218529	312977	318698
206000000000	20438.7	22651.1	29488.4	36411.1	53633.1	122321	218865	313347	318723
207000000000	20469	22741.1	29417.4	36419.7	53702.1	122342	219030	313417	318970
208000000000	20523.7	22688.3	29435.4	36510.5	53558.2	122653	219412	313666	319303
209000000000	20504.3	22532.6	29471.1	36396.6	53909.5	123161	219622	313789	319736
210000000000	20498.6	22735.8	29527.2	36482.7	53743.9	122983	219665	314244	319950
211000000000	20521.6	22628.9	29536.5	36504.1	54012.7	123302	220359	314396	320103
212000000000	20440.2	22748.8	29568	36549.1	54034.7	123603	220517	314657	320520
213000000000	20537.9	22546.2	29512.3	36601.2	54282	123620	220952	314471	320857
214000000000	20594.3	22705.6	29559.5	36453.1	54320.2	123830	221552	315109	320776
215000000000	20397.3	22589.7	29480	36631.9	54403.9	124167	221822	314809	320955
216000000000	20496.3	22580.9	29547.2	36584.7	54406.1	124338	221637	315046	321538
217000000000	20567.2	22761.5	29584.6	36663.3	54509.3	124768	222079	315122	321668
218000000000	20547.3	22703.3	29540.9	36640.2	54675	124727	222253	315408	321602
219000000000	20576.3	22585.9	29577.3	36614.1	54731.1	125074	222892	315357	322140
220000000000	20494.9	22568.8	29598.7	36699.8	54675.2	125222	223198	315498	322280
221000000000	20496.9	22673.1	29508.9	36749.9	54973.7	125470	223250	316075	322215
222000000000	20492.2	22653.2	29587.6	36700.7	55011.8	125913	223686	316213	322602
223000000000	20501.4	22696.2	29622.1	36760.3	55047.2	125951	223958	315740	322950
224000000000	20512.3	22597.4	29530.9	36695.3	55238	126426	224040	316319	323366
225000000000	20588.2	22712.5	29621.3	36902.7	55252.6	126288	224586	316545	323210
226000000000	20471.1	22652.1	29615.5	36905.8	55206.7	126517	224469	316366	323639
227000000000	20506.9	22668.5	29664.2	36796.4	55449.9	126849	224681	316619	323792
228000000000	20400.1	22644.9	29610.6	36838.2	55506.4	126957	225352	316820	324017
229000000000	20509.6	22646.9	29639.9	36898.6	55427.6	127233	225236	317140	324560
230000000000	20518.6	22660.4	29492.1	36975.3	55707	127419	225741	317117	324655
231000000000	20489.9	22658.3	29626	36876.9	55753.7	127802	225948	317197	324498
232000000000	20471.5	22704	29566.3	36963.1	55814.2	127672	226254	317199	324884
233000000000	20457.6	22729.6	29555.1	37104.7	55734.4	127852	226385	317258	325104
234000000000	20516.3	22623.7	29556.2	37057.6	56055.2	128097	226727	317468	325194
235000000000	20484.4	22603.3	29627.1	36908.6	55986.3	128404	226818	317578	325338
236000000000	20497.7	22647.2	29700.6	37107.6	55997.6	128778	227163	317780	325562
237000000000	20501.5	22736.1	29721.2	37116.1	56249.9	128765	227564	317971	326058
238000000000	20542.6	22715.8	29583.4	36976.7	56201	128753	227795	317792	325981
239000000000	20506.2	22620.9	29657.8	37054.9	56282	129135	228079	318123	325738
240000000000	20549.2	22587.1	29678.6	37134.4	56471.8	129510	228128	317876	326219
241000000000	20491.8	22686.8	29626.3	37109.1	56608	129291	228500	318201	326498
242000000000	20534.1	22814.7	29692.8	37179.4	56419.1	129816	228804	318368	326543
243000000000	20597.5	22742.2	29622.4	37162.5	56754.4	129906	228920	318356	326730
244000000000	20529.8	22630.3	29703.5	37166.7	56738.1	130092	229195	318124	326841
245000000000	20433.5	22748.9	29682.6	37252.7	56783.4	130210	229377	318728	327181
246000000000	20429.3	22661.5	29635.4	37270	56857.6	130317	229856	318608	327492
247000000000	20506.8	22725.3	29598.8	37282.3	56917	130534	230038	318933	327551
248000000000	20502.6	22681.2	29628.8	37241.5	56857.8	130782	230268	319021	327613
249000000000	20520.8	22633.8	29629.9	37334.2	57206	130841	230459	319157	328092
250000000000	20434.7	22645	29701.5	37428.2	57106.9	130956	230649	319062	328396
251000000000	20559.9	22714	29729.1	37352	57213.3	131191	230731	318887	328026
252000000000	20487	22668	29714	37387.7	57279.9	131411	230859	318933	328198
253000000000	20580.7	22702.7	29765.7	37418.6	57399.7	131411	231020	319598	328292
254000000000	20623.4	22572.4	29695.5	37385.9	57421.3	132053	231158	319472	328618
255000000000	20476	22614.7	29760.2	37452.4	57609.4	132170	231732	319510	328640
256000000000	20531.4	22696.6	29681.6	37423.3	57456.3	132198	231731	319413	328945
257000000000	20561.8	22723.9	29624.5	37510.5	57748.8	132205	232136	319318	329085
258000000000	20545.7	22639.3	29785.7	37476.8	57782.7	132515	232370	319921	329157
259000000000	20542.8	22715.6	29763.3	37457.2	58047.6	132860	232441	319554	329045
260000000000	20534.2	22593	29682.7	37557.1	57960.9	132782	232782	320256	329351
261000000000	20599.8	22647.5	29815.5	37593.2	58161.1	132955	232850	319864	329556
262000000000	20618	22655.4	29792.9	37616	58105	133117	233019	320032	329685
263000000000	20528	22709.1	29698.2	37494.3	58255	133568	233061	320096	329354
264000000000	20542.9	22707.5	29823.6	37656.2	58287.7	133237	233595	320185	329437
265000000000	20614.3	22658.6	29749	37667.5	58528.6	133654	233939	320294	330106
266000000000	20599.2	22779.2	29768.7	37667.7	58520.1	133933	233793	320286	330146
267000000000	20568.6	22763.1	29794.8	37670	58483.5	134048	234217	320638	330057
268000000000	20534.8	22712.8	29936.2	37659.1	58601.8	134016	234734	320530	330280
269000000000	20570.3	22657.5	29824.7	37706.8	58609.2	134460	234701	320664	330619
270000000000	20583.1	22623.3	29727.5	37682.4	58643.8	134631	234856	320391	330486
271000000000	20503.2	22617.6	29787.6	37872.1	58910.1	134795	235053	320492	330604
272000000000	20569	22655.4	29855	37764.6	59144.8	134648	235540	320786	330624
273000000000	20527.5	22709	29814.5	37718.9	58888.8	135071	235346	320888	330783
274000000000	20574.6	22585.8	29697.9	37778.4	58954.1	135175	235648	321150	330718
275000000000	20510.3	22659.6	29949.8	37853.5	59046.9	135240	235726	320882	331485
276000000000	20597.9	22650	29792.1	37844.2	59151.1	135409	235943	321161	330969
277000000000	20549.8	22697.6	29699.2	37913	59159	135723	235932	320962	330928
278000000000	20573.6	22690.5	29798.3	37956.4	59401.9	135552	236459	320929	331183
279000000000	20470.2	22748	29717.4	38048.3	59384.1	135987	236526	321215	331484
280000000000	20463.6	22709.5	29731.7	38045.2	59353.1	136112	236650	320901	331311
281000000000	20556	22690	29832.4	37997.1	59573.1	136424	236920	320875	331518
282000000000	20493.2	22785.9	29920.9	37948.6	59539.8	136322	237116	321103	331674
283000000000	20572.7	22763.1	29880.5	38074.6	59628.7	136347	237129	321371	331754
284000000000	20517	22710.6	29913.4	37949.5	59759	136579	237219	321340	331838
285000000000	20476.6	22666.2	29826.9	38049.6	59805.4	136797	237528	321562	331929
286000000000	20593.2	22723.4	29901.8	38030.1	59956.3	136960	237850	321573	332140
287000000000	20559.1	22731.7	29808.7	38051.9	60022.7	137043	238029	321561	331751
288000000000	20465.6	22784	29810.9	38112.7	59991	137133	238007	321486	332283
289000000000	20466.5	22741.2	29907	38207.9	60104	137454	238274	321972	332188
290000000000	20537.4	22710.3	29883.7	38103	60232.3	137769	238490	321729	332371
291000000000	20488.8	22645.8	29753.2	38024.9	60373.7	137486	238439	321625	332379
292000000000	20620.1	22850.9	29907.6	38034.5	60380.9	137710	238644	321683	332156
293000000000	20472.6	22738.1	29846.1	38173.5	60484.7	138062	239126	322180	332505
294000000000	20560.5	22713	29864.8	38297.6	60338.1	138073	239131	322095	332398
295000000000	20582.9	22773.3	29916.1	38189	60661.6	137995	239413	321885	332902
296000000000	20499.9	22775.3	29937	38227.2	60490.5	138277	239498	321840	332362
297000000000	20559.7	22796.2	29963.7	38391.6	60720.4	138669	239814	321789	332967
298000000000	20632.9	22737.6	29793.1	38348.9	60722.1	138672	239660	322235	332608
299000000000	20518.9	22676.9	29966.5	38248.1	60749.6	138826	239780	321786	332819
300000000000	20587.8	22861.2	29978.6	38459.1	60815.9	138741	240105	322093	332384
301000000000	20559.2	22683.4	29864	38399.4	60923.4	138981	240238	322220	332819
302000000000	20595.9	22700.5	29859.6	38477.5	61055.1	139169	240780	322468	333488
303000000000	20587	22650.2	29892.7	38449.6	61013.7	139530	240386	322304	333123
304000000000	20605.1	22736.3	29961.2	38442.3	61206.9	139542	240674	322280	333467
305000000000	20544.9	22725.6	30019.8	38465.5	61244.5	139571	240762	322455	332839
306000000000	20504.5	22782.2	29949.1	38518.5	61286.4	139629	241338	322184	333206
307000000000	20648.6	22779	29962.2	38529.3	61392.5	139898	240770	322432	333516
308000000000	20545.9	22722.2	29926.5	38595.3	61198.1	140179	241089	322407	333324
309000000000	20543.6	22680.6	29898.7	38447.4	61523.5	139988	241606	322413	333472
310000000000	20533	22673.4	30026.6	38635.8	61453.6	140291	241615	322760	333438
311000000000	20565.1	22675.7	29958	38646.6	61548.7	140453	241814	322555	333255
312000000000	20524.5	22641.6	29927	38564	61711.2	140532	242019	322584	333645
313000000000	20539.1	22703.9	29976.9	38643.6	61856.9	140539	242161	322654	333778
314000000000	20612.1	22718	29968.2	38681.2	61754.3	140706	242231	322695	333664
315000000000	20510.2	22748.2	30000.6	38574.8	62069.2	140906	242181	322377	333872
316000000000	20608.8	22679.4	30032.8	38641.7	61764.3	141061	242750	322191	333717
317000000000	20558.7	22681.1	29998.4	38731.5	61945	141093	242656	322576	333705
318000000000	20616.7	22842.9	30003.5	38855.2	62030.7	141202	242681	322628	334009
319000000000	20514.8	22638.1	29916.3	38835.1	62080.2	141383	242954	322799	333737
320000000000	20597.9	22805.2	29995.9	38633.1	62119.6	141672	243053	322737	333903
321000000000	20514.9	22659.7	30005.5	38811.2	62247.4	141715	243464	323111	333855
322000000000	20523.9	22695.9	30020	38709.3	62329.3	141675	243572	322881	334196
323000000000	20582.6	22713.2	29997.4	38761.4	62550.9	141824	243529	322985	334132
324000000000	20469.8	22801.8	29964.6	38827.9	62475.5	141944	243538	322695	334011
325000000000	20528.8	22730	30005.4	38817.3	62601.9	142034	243925	322746	334277
326000000000	20702.8	22708.8	30114.8	38883.2	62470.4	142383	244120	322956	333590
327000000000	20598.8	22711.8	29999.2	38807.3	62522.4	142498	244066	322896	334049
328000000000	20634.9	22730.6	30062.5	38927.5	62695.8	142252	244442	322960	334352
329000000000	20499.4	22766.1	30111.3	38898.3	62697.7	142499	244381	322948	333973
330000000000	20631.2	22728.7	30154.8	38823.9	62766.8	142521	244347	322829	334042
331000000000	20554.9	22709.5	29908.5	38931.9	63027.2	142749	244630	322689	334509
332000000000	20529.7	22654.6	30067.3	38990.2	62907	142682	244767	323023	334278
333000000000	20626.3	22690.6	30094.5	38921.2	63092.8	143029	244733	322680	334359
334000000000	20567.9	22741.1	30087.4	39070.1	63129.4	143219	244815	323131	334224
335000000000	20633	22706.6	30078.3	39073.1	63053.4	143206	244983	323100	334326
336000000000	20529.8	22749.9	30059	39132.5	63183.7	143227	245228	322590	334390
337000000000	20617.5	22674.1	29910.8	39150	63233.7	143562	245142	322761	334547
338000000000	20545.8	22650.5	30058.3	39018.7	63301.4	143500	245459	322701	334432
339000000000	20517.7	22740.7	30138.7	38994.6	63388.7	143576	245423	322936	334561
340000000000	20465.4	22755.7	30115.1	39038.9	63403.5	143655	245776	322951	334723
341000000000	20582.2	22745.1	30170.1	39197.4	63602.9	144026	245894	322960	334168
342000000000	20584.7	22771.7	30106.7	39056.3	63528.9	144089	246039	322999	334505
343000000000	20484.3	22776	30114.1	39212.8	63678.9	143979	245951	323178	334453
344000000000	20540	22818.5	30085.3	39282.6	63463.3	144158	246371	322830	334344
345000000000	20549	22778.1	30124.6	39193	63657.3	144004	246245	322944	334723
346000000000	20597.2	22781.9	30059	39287.4	63721.5	144555	246459	322709	333970
347000000000	20495.3	22746.4	30027.4	39371.3	63798.8	144405	246792	323258	334929
348000000000	20648.7	22825.9	30127.3	39240.4	63944.2	144314	246399	323402	335012
349000000000	20581.8	22688.2	30134.3	39316.9	64012.4	144575	246822	322811	335061
350000000000	20528.3	22852.7	30054.2	39399.9	63951.8	144508	247344	322932	334834
351000000000	20595	22781.8	30073.8	39309	64117	144807	246894	323149	334819
352000000000	20540.9	22742.3	30086.1	39307	64120.3	144483	247145	323161	334923
353000000000	20638.6	22724.9	30119.5	39390.2	64353.6	144799	247131	323173	334823
354000000000	20561.4	22717	30289	39400.2	64316.3	145117	247059	322748	334555
355000000000	20577.1	22895.8	30140.4	39420.8	64338.4	145147	247314	322851	334638
356000000000	20551.5	22677.7	30102.4	39403.7	64464.6	145088	247775	323003	334805
357000000000	20482.4	22800.8	30110.7	39451.5	64520.1	145498	247886	323158	335221
358000000000	20519.6	22660	30082.8	39463.8	64553.4	145570	247568	322747	334698
359000000000	20537	22689.8	30175.3	39468.9	64593.5	145526	247660	322856	334911
360000000000	20545	22847.7	30073	39537.5	64715.8	145735	248032	322967	334842
361000000000	20580.3	22739.4	30102.9	39490.7	64687.6	145722	248066	323068	335090
362000000000	20564.5	22825.8	30135.2	39640.1	64728	146088	248240	323024	334905
363000000000	20556.5	22819.6	30137.5	39487.9	64808.5	145742	248117	322963	334956
364000000000	20632.7	22777.2	30180.3	39569.1	64857.3	146011	248206	323221	334903
365000000000	20590.1	22673.6	30160.5	39680.6	64867.6	146230	248434	323107	334992
366000000000	20544.2	22851.3	30280.1	39586.8	64929.9	146202	248710	322869	334883
367000000000	20583.3	22764.5	30119.4	39727.6	65124.3	146343	248563	323183	334820
368000000000	20603.8	22778.3	30205.6	39529	65000.7	146311	248943	323318	335111
369000000000	20537.9	22839.4	30269.5	39679.2	65111.6	146606	249007	323159	334936
370000000000	20635.7	22782.5	30190.4	39659.4	65262.6	146634	249066	322723	334977
371000000000	20564.9	22694.9	30217.9	39748.6	65288.5	146390	249104	322825	335118
372000000000	20530.8	22650.4	30217.6	39852.3	65304.6	146707	249354	323074	335047
373000000000	20569.1	22806.3	30300.2	39932.9	65330.9	146674	249103	322871	335033
374000000000	20427.1	22869.4	30252.2	39834.7	65429.9	147101	249201	322804	335237
375000000000	20451.1	22760.9	30244.7	39765.5	65479.7	146894	249356	322940	335319
376000000000	20617.4	22771.5	30221.4	39698.6	65504.7	147007	249461	322847	334969
377000000000	20491.4	22697.2	30213.1	39855.1	65578.5	147122	249717	322917	335326
378000000000	20591.5	22746.1	30195.9	39875.3	65591.6	146993	249564	323019	334741
379000000000	20521.5	22743.8	30149.5	39857.4	65656.4	147280	249788	322590	335183
380000000000	20497.3	22779.8	30279.8	39838.5	65655.2	147279	250045	323080	335167
381000000000	20642.8	22750.5	30181	39862.6	65741	147529	250139	322701	335410
382000000000	20605.6	22640.7	30231.2	39969.5	65757.9	147495	250055	322694	334875
383000000000	20593.4	22755.7	30188	40124.4	65967.2	147461	250197	322787	334995
384000000000	20624.2	22730.2	30226.7	40004.4	65924.8	147790	250292	322551	334786
385000000000	20570.8	22831	30241.8	39895.6	65889.6	147628	250508	323019	335150
386000000000	20622.2	22704	30272.2	39932.5	65848.7	147859	250382	322986	335628
387000000000	20639.9	22798.9	30256.9	39981.2	66099.8	147880	250778	322527	335295
388000000000	20561	22770.9	30357.4	39901.5	66139.9	147737	250671	322789	335018
389000000000	20606.7	22761.1	30215.2	40022.1	66107.8	148273	250738	322775	335411
390000000000	20531.8	22696	30242.2	40073.9	66123.6	148201	250729	322576	335159
391000000000	20499.4	22801.8	30351.4	40160.7	66246.1	148415	250900	322966	335033
392000000000	20517.3	22735.3	30285.2	40218.5	66334.1	148413	250974	322745	334804
393000000000	20512.5	22698.7	30344.5	40045.2	66513.3	148491	251126	322920	335172
394000000000	20550.7	22733.4	30490.3	40193.4	66493.3	148503	251053	322604	335153
395000000000	20631	22756.8	30256.6	40131.3	66517.5	148689	251409	322716	334997
396000000000	20623.2	22685.2	30342.8	40084.1	66627.9	148626	251391	322872	335640
397000000000	20593.2	22740.3	30251.6	40033.4	66583.6	148969	251281	322668	334946
398000000000	20546.5	22795.1	30377.4	40174.9	66656.9	148961	251698	322619	335029
399000000000	20554.4	22694.9	30303.2	40207.9	66793.4	149111	251355	322457	335239
400000000000	20590.2	22671.4	30339.4	40080	66521.6	149046	251508	322496	335004
401000000000	20490.7	22720.7	30285.6	40287.5	66752	149273	251763	322491	334885
402000000000	20506	22752.5	30401.1	40234.4	66927.5	149137	251792	322616	334825
403000000000	20522.2	22720.1	30277.1	40264.8	66979.2	149264	252038	322522	334964
404000000000	20658.5	22785.2	30219	40201.3	66906.6	149104	252018	322714	335143
405000000000	20652.2	22751.7	30342	40353.2	67018.8	149170	252043	322584	335143
406000000000	20525.3	22723.8	30346.3	40412.3	66991.1	149372	252094	322600	335110
407000000000	20558.1	22787.2	30301.3	40469.2	67192.4	149459	252064	322290	335126
408000000000	20655	22843.8	30308.5	40338.3	67190.4	149344	252472	322574	335049
409000000000	20652.3	22712.2	30236.5	40463.3	66981.8	149799	252459	322588	334960
410000000000	20491	22725.1	30391	40375.4	67175.5	149645	252484	322221	335068
411000000000	20625.6	22717.4	30356	40449.6	67305	149722	252578	322359	334868
412000000000	20552.7	22699.6	30384.2	40421.2	67347.6	149594	252604	322518	335053
413000000000	20471.2	22760.6	30286.4	40477.2	67284.7	149921	252557	322115	335089
414000000000	20544.6	22837.4	30334	40462.2	67518.3	149902	253022	322511	335119
415000000000	20616.7	22908.6	30385.8	40445.2	67590.7	150006	252880	322238	334986
416000000000	20544.6	22769.8	30395.8	40528.4	67446.5	150063	252802	322870	334671
417000000000	20524	22741.4	30358.7	40456.5	67438.9	150052	253097	322336	334881
418000000000	20578.5	22801	30316.3	40611.8	67656.4	150153	252901	322338	335325
419000000000	20497.1	22745.4	30399.5	40590.1	67615.5	150451	253240	322341	334986
420000000000	20595.3	22824	30363.1	40569.4	67613.3	150530	253052	322046	335055
421000000000	20619.8	22712.4	30391.1	40650.1	67743.4	150213	253140	322166	335193
422000000000	20568	22766.7	30482.9	40560.6	67831.5	150172	253345	322291	335160
423000000000	20595.7	22787.9	30362.8	40591.2	67853.7	150356	253477	322070	335012
424000000000	20588.9	22805	30350.8	40626.4	67954.8	150659	253145	322299	334748
425000000000	20568.4	22795.8	30388.4	40663.5	67885.5	150896	253407	321834	334933
426000000000	20624.3	22780.2	30358.3	40677.8	67951.2	150478	253675	322233	334948
427000000000	20582.2	22715	30361.7	40682.7	67989.7	150909	253621	321974	334843
428000000000	20646.9	22746.5	30413.3	40722.2	68002.8	150879	253284	321796	335063
429000000000	20646.5	22820.7	30389.3	40738.2	68305	151056	253555	322065	335315
430000000000	20548.7	22780.8	30377.5	40743.6	68184.7	150938	253721	321985	335037
431000000000	20504.9	22784.9	30338.9	40774.6	68297.7	151208	253652	321714	335175
432000000000	20605.4	22739.4	30474.4	40714.8	68408.4	151181	253829	321990	335211
433000000000	20631.1	22751.3	30398	40756.1	68342.9	151226	254219	322162	334983
434000000000	20692.9	22764.8	30320.6	40682.5	68468.8	151337	254083	322093	335210
435000000000	20685.5	22805.4	30306	40932.8	68317.7	151273	253658	321976	335120
436000000000	20630.5	22755.2	30340.4	41018.8	68432.7	151548	254160	321858	334850
437000000000	20675.2	22836.1	30490.7	40959.2	68545.2	151653	254372	321602	335034
438000000000	20619.1	22743.4	30440.2	40848.3	68639.6	151653	254239	321797	335069
439000000000	20631.1	22775.9	30407.1	40837.8	68702.6	151540	254292	321526	335162
440000000000	20525.2	22763.5	30405.9	40867.4	68431.3	151312	254261	321656	334951
441000000000	20622.9	22840.8	30412.4	40865.7	68714.7	151680	254226	321736	334725
442000000000	20572.1	22775.8	30462.6	40946.8	68683.9	151741	254579	321597	334880
443000000000	20501.2	22809.8	30405	41036.5	68774.8	151893	254386	321585	334528
444000000000	20655.5	22829.8	30431.4	41110.2	68765.1	151796	254539	321399	335082
445000000000	20570.2	22797.5	30538	40909.5	68824.7	151807	254351	321720	334992
446000000000	20681.3	22784	30352.8	40995.5	68914	152010	254470	321432	335091
447000000000	20633.3	22694.2	30368.9	41071.2	68838	152003	254782	321558	334960
448000000000	20607.1	22905	30395.8	41005.4	68942.4	152286	254864	321457	335157
449000000000	20623.2	22811.1	30476.1	41022.9	68901.8	152023	254671	321422	334985
450000000000	20546.7	22759.6	30408.5	40967.1	68934.1	151928	254989	321266	334926
451000000000	20599.4	22799.2	30441.5	41087.2	69188.4	152320	254929	321402	334648
452000000000	20544.7	22687.9	30464.8	41169.6	69358.2	152224	255122	321438	335033
453000000000	20461.6	22717	30391.2	41153.7	69092.6	152458	254788	321354	334925
454000000000	20610.8	22821.2	30375.8	41208.5	69238.8	152372	255368	321586	335133
455000000000	20600.7	22871.5	30362.3	41166.7	69293.5	152478	254928	321457	334826
456000000000	20620.6	22742.7	30440.1	41092.6	69331.5	152422	255304	321020	334688
457000000000	20582.2	22727.2	30382.2	41224.1	69416.4	152573	255355	321321	334752
458000000000	20516	22772.3	30425.3	41123.1	69161.6	152503	255103	320952	334816
459000000000	20547.6	22847.1	30565.1	41217.3	69234.6	152546	255105	321250	335000
460000000000	20587	22739.7	30434.4	41293.1	69546	152826	255325	321176	334918
461000000000	20603.5	22833.4	30436.1	41189.7	69593.9	152753	255251	321023	334703
462000000000	20515.3	22829.2	30547.6	41294.7	69736.1	152826	255253	320701	334995
463000000000	20623.7	22870.1	30481	41230.6	69449.4	152838	255611	320970	334841
464000000000	20542.4	22728.6	30580.2	41245.1	69622.9	153215	255578	321327	334978
465000000000	20582.1	22740	30498	41188.7	69907.9	153042	255589	320890	334542
466000000000	20571.3	22941.7	30395.1	41335	69861.9	152982	255788	320819	334705
467000000000	20518.2	22828.9	30513	41376.1	69690.8	153027	255792	320931	334883
468000000000	20619.4	22700.2	30476.1	41364.2	69671	153252	255760	320924	334938
469000000000	20585.4	22775	30542.5	41437	69677.8	153293	255640	320541	334604
470000000000	20605.9	22795.8	30492.9	41454.3	69724.4	153227	255976	320964	334699
471000000000	20648.1	22695.6	30469.5	41530.2	69892.1	153273	255840	320736	334483
472000000000	20564.3	22844.8	30557.2	41371.9	70070.6	153361	255968	320619	334865
473000000000	20597.3	22787.2	30566.3	41424	69899.3	153398	256065	320521	334283
474000000000	20506.3	22741.4	30512.2	41420.3	70067.6	153112	255932	320561	334756
475000000000	20607	22764.9	30580	41413.8	70046.2	153529	256232	321022	334743
476000000000	20547.5	22912.1	30508.8	41403.2	70026.9	153388	256349	320676	334559
477000000000	20664.5	22922.5	30450	41403.6	70211	153715	256176	320347	334445
478000000000	20544.4	22783.5	30547.7	41469	70159	153619	256077	320678	334604
479000000000	20602.7	22774.7	30600.7	41406.1	70124.1	153844	256231	320697	334647
480000000000	20619.1	22798.8	30508.6	41550.1	70281.9	153778	256312	320748	334611
481000000000	20558.7	22812.7	30518.8	41503	70283.8	153812	256081	320762	334689
482000000000	20570.3	22766.5	30585	41515.4	70353.2	153668	256065	320538	334552
483000000000	20612.6	22848.8	30510	41480	70273.1	153812	256584	320585	334847
484000000000	20583.6	22830.7	30548.4	41512.8	70312.6	153636	256436	319866	334387
485000000000	20573.2	22722	30557.5	41513.3	70521.7	153985	256587	320262	334653
486000000000	20614.9	22736.5	30565.9	41471.3	70431.3	153887	256297	320166	334697
487000000000	20568.9	22708.7	30454.2	41598.8	70410.9	154091	256779	320053	334646
488000000000	20560.8	22843.8	30527.3	41484.2	70505.8	154073	256673	319996	334790
489000000000	20513.3	22806.2	30594.6	41518.9	70585.6	154184	256544	320195	334434
490000000000	20637.8	22755.8	30571	41629.2	70469.8	154062	256891	320058	334471
491000000000	20518.5	22736.3	30577.7	41726.8	70666.6	154218	256552	320227	334614
492000000000	20603.4	22843.9	30574.5	41665.3	70726.5	154079	256965	320222	334448
493000000000	20593.2	22713.3	30553.2	41671.6	70726.1	154298	256618	320005	334237
494000000000	20507.3	22635.5	30597.1	41510.5	70778.5	154497	256879	320179	334292
495000000000	20574.1	22890.6	30535.8	41617.7	70955.1	154558	256659	320246	334546
496000000000	20631.2	22819.1	30619.2	41628.6	70903.3	154426	257034	319754	334438
497000000000	20580.2	22888.1	30594	41770.3	70877	154422	256436	320004	334179
498000000000	20480.9	22818.2	30603.8	41684.7	70832.4	154678	256928	319929	334011
499000000000	20623.9	22789.3	30549.8	41687	70716.8	154570	256977	319768	334514
500000000000	20600.6	22798.1	30607.5	41818.9	70954	154515	257017	319954	334612
501000000000	20509.4	22786.4	30673	41753.5	71069.6	154484	257211	319755	334247
502000000000	20596.2	22822.5	30594.4	41758.2	71031.6	154628	257071	320008	334270
503000000000	20556.7	22840.7	30542.2	41806.7	71004.6	154516	257276	319869	334444
504000000000	20539.8	22820.4	30530.8	41959.4	71131.9	154654	257189	319792	333858
505000000000	20596.1	22819.3	30596.7	41830.7	71171.3	154755	257125	319867	334131
506000000000	20598.4	22765.8	30478.9	41967.4	71231.9	154779	257294	319418	334277
507000000000	20531.3	22868.2	30687.6	41930.5	71151.8	154518	257355	319563	334055
508000000000	20565.7	22743.1	30739.5	41955.1	71288.6	154940	257566	319339	334078
509000000000	20575.5	22847.1	30542.5	41955.9	71334.7	155048	257490	319661	334179
510000000000	20575.8	22806	30748.4	41933.3	71339.4	155047	257169	319181	334239
511000000000	20595.8	22778.8	30618.9	41960.3	71378.8	155119	257196	319508	333936
512000000000	20600.9	22828.8	30583.1	41918.5	71289.2	155076	257591	319607	334280
513000000000	20561	22732.6	30668.4	41856.6	71535.1	154984	257373	319315	334032
514000000000	20647	22811.9	30775.6	42044.2	71494.9	154939	257225	319170	333946
515000000000	20519.1	22833	30613.8	42067.2	71399.3	155314	257381	319396	334098
516000000000	20577.3	22799.7	30712.3	41987.1	71399.2	155335	257460	319211	334257
517000000000	20550.6	22767.8	30652.4	42026.4	71530.1	155290	257617	319411	334094
518000000000	20538.7	22851.7	30621.8	42188.3	71598.2	155478	257512	319336	334108
519000000000	20548.5	22794.3	30646.3	42194.4	71601.5	155329	257535	319215	333808
520000000000	20597.1	22758.7	30649.6	42185.1	71734.8	155200	257705	319039	334078
521000000000	20496.2	22797.5	30582.1	42127.6	71852.3	155414	257598	319286	334104
522000000000	20633.7	22712.6	30704.3	42224.8	71597.6	155375	257881	319136	334264
523000000000	20616.7	22733.5	30599.3	42055.6	71677.7	155594	257653	319021	334129
524000000000	20604.6	22782.7	30643.2	42213.7	71795.2	155477	257645	318974	334014
525000000000	20553.3	22714.3	30692.7	42213.3	71898.1	155441	257791	319084	333851
526000000000	20507.5	22720.9	30723.1	42070.2	71903.2	155440	257865	318736	333777
527000000000	20507.3	22804.4	30676.8	42215.2	71903.8	155387	258040	318568	333955
528000000000	20575.7	22795.6	30548.8	42126	72017.3	155702	257983	318897	334139
529000000000	20533.6	22748.6	30575.3	41985.1	72001.8	155624	257965	319138	334103
530000000000	20481.1	22763.1	30680.1	42254.6	72048.9	155660	257736	318927	333908
531000000000	20545.2	22732	30719.9	42248.7	72006.2	155607	258054	318899	333851
532000000000	20572.6	22708.5	30649.7	42208.9	71992	155743	257853	318878	334052
533000000000	20611.4	22820	30725.3	42291.8	72221	156086	258047	318949	333775
534000000000	20535.4	22788.6	30651.5	42306.9	72268.5	155819	257646	318415	334121
535000000000	20571.3	22741.6	30782.5	42272	72069.4	156030	257990	318529	333711
536000000000	20548.5	22775	30762.6	42281.2	72360.6	155940	257978	318603	333983
537000000000	20585.6	22790.7	30699.9	42331.1	72248.4	155905	258074	318952	333716
538000000000	20546.3	22816.7	30748.8	42216.2	72198.7	155827	258158	318660	333902
539000000000	20564	22726.1	30701.7	42376.4	72422.6	156061	258144	318722	333560
540000000000	20643.3	22814.4	30762.8	42197.7	72242.9	156315	258247	318407	333905
541000000000	20555.6	22667.8	30643.4	42363.7	72260.3	156040	258444	318197	334082
542000000000	20578.8	22806.5	30705.7	42336.8	72411.8	156053	257941	318158	334121
543000000000	20575.9	22816.5	30612.5	42439.1	72313.8	156226	258201	318596	333715
544000000000	20596.1	22812.1	30770.4	42425.7	72390.3	155972	258134	318300	333900
545000000000	20542	22874.1	30728.1	42476.8	72399.6	156265	258158	318429	333491
546000000000	20650	22708.2	30737.2	42285.5	72579	156454	258348	318376	333874
547000000000	20571.2	22734.9	30658.7	42411.6	72589.9	156184	258371	318157	333512
548000000000	20668.8	22812.4	30754.7	42466.5	72733.2	156361	258375	317951	334103
549000000000	20555.5	22841.1	30755.3	42638.5	72742.5	156317	258062	318354	333424
550000000000	20585.6	22767.4	30755.7	42457.1	72771.5	156447	258397	318212	333770
551000000000	20578.8	22733.2	30644.2	42508.6	72615.3	156425	258462	318326	333614
552000000000	20535.7	22848.1	30716.8	42533.2	72784.4	156636	258538	317670	333864
553000000000	20583.2	22689.3	30683	42488	72688.9	156736	258370	318356	333631
554000000000	20577.5	22821.4	30779.5	42597	72660.2	156469	258727	317767	333717
555000000000	20555.2	22738.7	30731.9	42490.4	72808.8	156810	258458	317847	333973
556000000000	20579.9	22840.8	30868.9	42563.7	72913.1	156572	258478	318032	333583
557000000000	20576.2	22815	30675.2	42488.5	72879.6	156652	258592	317054	333831
558000000000	20539.3	22864.4	30773.6	42635.2	72840.3	156669	258346	317696	333556
559000000000	20583.4	22717.3	30792.2	42698.7	72907.4	156569	258609	317656	333638
560000000000	20549.8	22720.5	30836.5	42523.7	72993.3	156673	258492	317631	333678
561000000000	20597.4	22783.7	30713.7	42678.8	73083.9	156818	258821	317433	333801
562000000000	20565.3	22753.6	30744.8	42663.9	73018.9	156597	258763	317515	333563
563000000000	20542.8	22744.9	30773.1	42718.9	73064	156802	258467	317697	333423
564000000000	20600.7	22765.7	30776.6	42579.4	73097.1	157156	258553	317346	333579
565000000000	20607.1	22817.4	30675.3	42663	73036.6	156970	258699	317485	333719
566000000000	20579.3	22740.7	30848.7	42607.9	73055.6	157199	258522	317734	333465
567000000000	20500.1	22783.2	30782.7	42737.8	73164.2	156905	258577	317448	333560
568000000000	20656	22803.8	30713.8	42671.5	73145.5	157108	258765	317285	333755
569000000000	20537.4	22772	30767.5	42769.7	73249.8	156737	258528	317567	333666
570000000000	20618	22798.1	30832.3	42705.4	73214.1	157044	258677	317130	333694
571000000000	20607.3	22751.7	30777.1	42805.4	73306.4	157259	258693	317370	333220
572000000000	20605.8	22774.6	30856	42744.2	73320.2	156950	259012	317357	333177
573000000000	20514	22866.6	30726.1	42766.2	73425.4	157072	258706	317335	333541
574000000000	20566	22841.6	30774.1	42710.8	73263.6	157251	258755	317089	333731
575000000000	20614	22669.3	30799.9	42693.3	73312.4	156901	258711	317115	333180
576000000000	20626	22860.5	30808.2	42837.3	73433.8	157299	258626	317135	333316
577000000000	20602.1	22839.9	30788.7	42731.7	73311.7	157338	258743	317112	333478
578000000000	20645.5	22779.8	30881.5	42781.9	73427.3	157272	258940	317383	333090
579000000000	20579.6	22721.2	30903.5	42816	73514.6	157355	258856	317100	333205
580000000000	20576.5	22718.9	30816.7	42900.7	73526.6	157305	258968	316891	333511
581000000000	20589.7	22773.3	30861.4	42885	73508	157197	258938	316861	333157
582000000000	20641.9	22754	30882.8	43069.5	73632.3	157521	258915	316940	333672
583000000000	20570.5	22800.2	30834.5	42886	73597.1	157545	258900	316605	333476
584000000000	20534.4	22808.8	30793.5	42927.7	73623	157454	258600	317344	333169
585000000000	20504.7	22847.8	30853.3	42953	73527.7	157358	259049	316822	333476
586000000000	20596.4	22869.9	30814.1	42926.2	73779.8	157326	258749	316611	333248
587000000000	20580.6	22804.5	30775.3	42947	73662.7	157627	258966	316682	333467
588000000000	20657.9	22812.4	30751.3	43027.1	73722.5	157522	258728	316538	333468
589000000000	20599.6	22766.5	30842.7	43023.9	73689.8	157492	258838	316482	333174
590000000000	20618.6	22700.8	30866.1	43018	73737.5	157704	259124	316552	333501
591000000000	20563.2	22740.7	30918.4	43062.6	73874	157938	258971	316389	332999
592000000000	20474.7	22741.8	30873.8	43063.2	73857.4	157609	259017	316494	333431
593000000000	20628.4	22870	30909.9	43007.3	73866.8	157588	258830	316581	333167
594000000000	20529.2	22806	30843.2	42906.5	73780.8	157692	258941	316067	333309
595000000000	20600.7	22734.9	30874	43037.8	73923.7	157736	258879	316252	333463
596000000000	20644.9	22798.7	30809.4	43040	74055	157457	259257	316267	332999
597000000000	20572.1	22848.6	30907.4	42957	74098	157559	258978	316395	333152
598000000000	20528.8	22780.7	30856	43043.2	73866.2	157840	259011	316301	333093
599000000000	20621.7	22731.2	30823.6	43181	73988	157990	259075	316387	333000
600000000000	20574.8	22801.3	30932.8	43055.5	74095.1	157657	258771	315950	333333

## Sheet: Sheet1
																			Time	0 uM DMPG	0.65uM DMPG	1.30um DMPG	2.60 uM DMPG	5.2uM DMPG	10.41uM DMPG	20.83uM DMPG	41.66uM DMPG	83.33uM
Time	Control	0.65uM	1.30uM	2.60uM	5.20uM	10.41uM	20.83uM	41.66uM	83.33uM	micelle system: 20mM HEPES, pH7.5; DMPC= 166uM; Ca2+=1.67mM, Dap=15uM									Time	DMPC	0.65 uM DMPG	1.30 um DMPG	2.60 uM DMPG	5.2uM DMPG	10.41uM DMPG	20.83uM DMPG	41.66uM DMPG	83.33uM							DMPG	F450(t=10 min)					DMPG	F450 (t=0)
0	20189.7	21889.5	26871.4	28338.8	34176.5	46583	67833.8	105202	92652.2										0	201.897	218.895	268.714	283.388	341.765	465.83	678.338	1052.02	926.522							0	206					0	202
1	20211.9	21876.2	27033.2	28369.6	34412.5	46719.8	68798.4	107565	94595.2										1	202.119	218.762	270.332	283.696	344.125	467.198	687.984	1075.65	945.952							0.65	228					0.65	219
2	20105.3	21964.9	26900.9	28511.1	34523.2	47053.1	69968.1	109855	96706.9										2	201.053	219.649	269.009	285.111	345.233	470.531	699.681	1098.55	967.069							1.3	309					1.3	269
3	20114.2	21786.1	27012.7	28580.4	34624.8	47497.2	70793.7	112540	98871.1										3	201.142	217.861	270.127	285.804	346.248	474.972	707.937	1125.4	988.711							2.6	431					2.6	283
4	20183.6	21941.3	26963.9	28592	34827.2	47850.8	71722.7	114537	100766										4	201.836	219.413	269.639	285.92	348.272	478.508	717.227	1145.37	1007.66							5.2	741					5.2	342
5	20202.8	21829.1	27046.3	28689.5	34982.6	48054.4	72785.8	116975	102775										5	202.028	218.291	270.463	286.895	349.826	480.544	727.858	1169.75	1027.75							10.41	1580					10.41	466
6	20241.2	21916.8	27006.5	28720.8	35091.4	48413.4	73628.8	119428	104888										6	202.412	219.168	270.065	287.208	350.914	484.134	736.288	1194.28	1048.88							20.83	2590					20.83	678
7	20209.9	21849.2	27052.8	28919.6	35198.9	48820.5	74612.8	121865	106894										7	202.099	218.492	270.528	289.196	351.989	488.205	746.128	1218.65	1068.94							41.66	3160					41.66	1050
8	20364.4	21929.4	27095.3	28962.3	35299.3	49004.3	75622.9	124078	109176										8	203.644	219.294	270.953	289.623	352.993	490.043	756.229	1240.78	1091.76							83.33	3330
9	20208.3	21992.2	27106.5	28991.8	35554.6	49458.2	76606.4	126548	111148										9	202.083	219.922	271.065	289.918	355.546	494.582	766.064	1265.48	1111.48
10	20171.5	21902.5	27175.1	29067.8	35634	49626.1	77374.3	128986	113000										10	201.715	219.025	271.751	290.678	356.34	496.261	773.743	1289.86	1130
11	20160.3	21910.3	27209.5	29236.9	35722.7	50091.2	78398.1	131183	114875										11	201.603	219.103	272.095	292.369	357.227	500.912	783.981	1311.83	1148.75
12	20203.6	21911.5	27126.2	29084.7	35851	50312.1	79571.5	133765	117134										12	202.036	219.115	271.262	290.847	358.51	503.121	795.715	1337.65	1171.34
13	20253.2	21859.6	27078.8	29232.5	35976.3	50835.7	80348	136153	118937										13	202.532	218.596	270.788	292.325	359.763	508.357	803.48	1361.53	1189.37
14	20292.7	21881.8	27243.3	29320.5	36039.1	51123.5	81186.6	138322	120886										14	202.927	218.818	272.433	293.205	360.391	511.235	811.866	1383.22	1208.86
15	20164	21894.1	27291.7	29303	36372.7	51359.6	81994.2	140645	122859										15	201.64	218.941	272.917	293.03	363.727	513.596	819.942	1406.45	1228.59
16	20302.3	21949.3	27203.1	29428.3	36286.3	51878.2	83377.3	143132	124894										16	203.023	219.493	272.031	294.283	362.863	518.782	833.773	1431.32	1248.94
17	20301.6	21893.1	27258.7	29398.9	36518.4	52168.1	84262.7	145455	126856										17	203.016	218.931	272.587	293.989	365.184	521.681	842.627	1454.55	1268.56
18	20309.4	21929.4	27285.5	29574.4	36519.4	52635.2	85385.5	147524	128967										18	203.094	219.294	272.855	295.744	365.194	526.352	853.855	1475.24	1289.67
19	20225.8	21876.2	27364.1	29609.9	36833.5	52980.8	86268.9	149807	130677										19	202.258	218.762	273.641	296.099	368.335	529.808	862.689	1498.07	1306.77
20	20255.4	21986.4	27459.6	29716	36738.3	53510.2	87132.8	152140	132726										20	202.554	219.864	274.596	297.16	367.383	535.102	871.328	1521.4	1327.26
21	20240.4	21947.8	27310	29661.1	36946.5	53920	88164.7	154529	134606										21	202.404	219.478	273.1	296.611	369.465	539.2	881.647	1545.29	1346.06
22	20353	22045.3	27390.8	29752.1	36954.6	54094.8	89348.9	156581	136582										22	203.53	220.453	273.908	297.521	369.546	540.948	893.489	1565.81	1365.82
23	20330	21996.7	27362.7	29744.6	37006.2	54696	90470.1	158788	138459										23	203.3	219.967	273.627	297.446	370.062	546.96	904.701	1587.88	1384.59
24	20300.8	21990.9	27393	29836.3	37301.5	55183.8	91392.6	161239	140426										24	203.008	219.909	273.93	298.363	373.015	551.838	913.926	1612.39	1404.26
25	20267.2	21950.5	27416.1	29981.1	37238	55427.7	92671.4	163281	142183										25	202.672	219.505	274.161	299.811	372.38	554.277	926.714	1632.81	1421.83
26	20280.8	22018.5	27467.8	30083.2	37433.2	55940.9	93544.4	165616	143919										26	202.808	220.185	274.678	300.832	374.332	559.409	935.444	1656.16	1439.19
27	20245.8	22015.5	27509.2	30008.7	37510.6	56541.4	94365.2	167766	146062										27	202.458	220.155	275.092	300.087	375.106	565.414	943.652	1677.66	1460.62
28	20320.3	21988	27452.9	30070.6	37519.5	56871.1	95634.9	169887	147774										28	203.203	219.88	274.529	300.706	375.195	568.711	956.349	1698.87	1477.74
29	20336.3	21971.4	27577.1	30184.9	37740.4	57235.2	96730.2	171926	149482										29	203.363	219.714	275.771	301.849	377.404	572.352	967.302	1719.26	1494.82
30	20303.1	22099.2	27571.3	30285.3	37822.8	57657.8	97814	174049	151418										30	203.031	220.992	275.713	302.853	378.228	576.578	978.14	1740.49	1514.18
31	20370.7	22004.5	27637.8	30331.3	37863.8	58297.6	98950	176362	153403										31	203.707	220.045	276.378	303.313	378.638	582.976	989.5	1763.62	1534.03
32	20413.1	22153.6	27461.6	30281.6	37971.6	58725.8	99979.6	178196	155095										32	204.131	221.536	274.616	302.816	379.716	587.258	999.796	1781.96	1550.95
33	20228.6	22051.4	27560.9	30423	38178.9	59115.8	101106	180294	156866										33	202.286	220.514	275.609	304.23	381.789	591.158	1011.06	1802.94	1568.66
34	20407.1	22086.8	27489.5	30527.3	38282.4	59417.8	101862	182342	158807										34	204.071	220.868	274.895	305.273	382.824	594.178	1018.62	1823.42	1588.07
35	20440.6	22011.3	27692.6	30555.3	38343.6	60030.3	103032	184258	160433										35	204.406	220.113	276.926	305.553	383.436	600.303	1030.32	1842.58	1604.33
36	20336.6	22139	27616.5	30606	38338.4	60374.8	104382	186531	162362										36	203.366	221.39	276.165	306.06	383.384	603.748	1043.82	1865.31	1623.62															DMPG	POPA
37	20254.3	22085.2	27688.7	30551.7	38539.7	60769.9	105467	188493	163994										37	202.543	220.852	276.887	305.517	385.397	607.699	1054.67	1884.93	1639.94														0	206	146.927
38	20302.6	22047.9	27687.1	30735.2	38578.1	61407.7	106509	190209	165645										38	203.026	220.479	276.871	307.352	385.781	614.077	1065.09	1902.09	1656.45														0.65	228	133.206
39	20373.4	22164.1	27668.9	30709.2	38743.5	61824.3	107703	192402	167471										39	203.734	221.641	276.689	307.092	387.435	618.243	1077.03	1924.02	1674.71														1.3	309	173.629
40	20379.5	22021.7	27614.9	30816.2	38842.1	62290.6	108746	194007	169282										40	203.795	220.217	276.149	308.162	388.421	622.906	1087.46	1940.07	1692.82														2.6	431	164.981
41	20403.7	22162.8	27636.9	30937.5	38858.8	62751.9	109895	196029	170660										41	204.037	221.628	276.369	309.375	388.588	627.519	1098.95	1960.29	1706.6														5.2	741	97.1145
42	20288.1	22161.1	27681.8	30843.8	39002.7	63128.3	110825	198000	172283										42	202.881	221.611	276.818	308.438	390.027	631.283	1108.25	1980	1722.83														10.41	1580	104.032
43	20227.9	22099.5	27845.7	30900.4	39053.5	63656.3	112130	199348	174488										43	202.279	220.995	278.457	309.004	390.535	636.563	1121.3	1993.48	1744.88														20.83	2590	161.09
44	20323.7	22077.7	27769.7	30959.2	39046.1	64151.1	113107	201623	175756										44	203.237	220.777	277.697	309.592	390.461	641.511	1131.07	2016.23	1757.56														41.66	3160	178.218
45	20412.7	22070.3	27755.4	30999.3	39240.9	64566.1	114321	203224	177521										45	204.127	220.703	277.554	309.993	392.409	645.661	1143.21	2032.24	1775.21														83.33	3330	205.945
46	20360.3	22126	27763.6	31060.8	39229.2	64951.5	115282	204931	179126										46	203.603	221.26	277.636	310.608	392.292	649.515	1152.82	2049.31	1791.26
47	20344	22140.7	27801.5	31105.5	39266	65352.6	116572	206739	180831										47	203.44	221.407	278.015	311.055	392.66	653.526	1165.72	2067.39	1808.31
48	20279.2	22183.1	27819.9	31176.1	39584.7	65878.6	117512	208485	182246										48	202.792	221.831	278.199	311.761	395.847	658.786	1175.12	2084.85	1822.46
49	20377	22069.7	27813.8	31191.1	39532.8	66363.9	118923	209964	183819										49	203.77	220.697	278.138	311.911	395.328	663.639	1189.23	2099.64	1838.19
50	20357.1	22199.4	27923.7	31329.3	39704.4	66714.5	119827	211692	185688										50	203.571	221.994	279.237	313.293	397.044	667.145	1198.27	2116.92	1856.88
51	20391.8	22104.2	27950.4	31366.8	39750.4	67141.2	120933	213323	186950										51	203.918	221.042	279.504	313.668	397.504	671.412	1209.33	2133.23	1869.5
52	20407.8	22156.7	27782.2	31350.3	39837.7	67682.4	121721	215111	188902										52	204.078	221.567	277.822	313.503	398.377	676.824	1217.21	2151.11	1889.02
53	20319.3	22284.1	27957.7	31332.2	39988.2	68160.2	123017	216509	190272										53	203.193	222.841	279.577	313.322	399.882	681.602	1230.17	2165.09	1902.72
54	20273	22228.1	27934.3	31636.6	40047.9	68542.2	124306	218259	192008										54	202.73	222.281	279.343	316.366	400.479	685.422	1243.06	2182.59	1920.08
55	20393.4	22133.7	27979.4	31487.4	40124.8	68925.3	125277	219574	193371										55	203.934	221.337	279.794	314.874	401.248	689.253	1252.77	2195.74	1933.71
56	20395	22167.7	27871	31512.9	40101.8	69399.7	126257	221015	194971										56	203.95	221.677	278.71	315.129	401.018	693.997	1262.57	2210.15	1949.71
57	20420.3	22155.1	27954.7	31646.1	40379.1	69726.8	127462	222486	196569										57	204.203	221.551	279.547	316.461	403.791	697.268	1274.62	2224.86	1965.69
58	20325	22265.9	28002.2	31654.9	40388.3	70286.8	128447	224006	197995										58	203.25	222.659	280.022	316.549	403.883	702.868	1284.47	2240.06	1979.95
59	20275.1	22205.9	27901.2	31740.2	40504.1	70872.7	129665	225205	199293										59	202.751	222.059	279.012	317.402	405.041	708.727	1296.65	2252.05	1992.93
60	20379.1	22240.9	27952.9	31820.8	40566.2	71108.2	130685	227021	200985										60	203.791	222.409	279.529	318.208	405.662	711.082	1306.85	2270.21	2009.85
61	20377.4	22200.9	27951.2	31823.6	40737.5	71412.8	131745	228300	202260										61	203.774	222.009	279.512	318.236	407.375	714.128	1317.45	2283	2022.6
62	20391.4	22164	28083.2	31821.1	40723.3	72005.4	132807	230254	204116										62	203.914	221.64	280.832	318.211	407.233	720.054	1328.07	2302.54	2041.16
63	20310.3	22234.1	27972	31966.5	40788	72507.9	133612	231202	205566										63	203.103	222.341	279.72	319.665	407.88	725.079	1336.12	2312.02	2055.66
64	20378.5	22314.5	28077.6	31995.1	40848.7	72816.1	134726	232611	206795										64	203.785	223.145	280.776	319.951	408.487	728.161	1347.26	2326.11	2067.95
65	20328.6	22253.3	28206.3	32035.9	40866.3	73202.9	135686	234145	207993										65	203.286	222.533	282.063	320.359	408.663	732.029	1356.86	2341.45	2079.93
66	20441.9	22213.3	28088.6	31978.1	40953.8	73934.6	136933	235062	209751										66	204.419	222.133	280.886	319.781	409.538	739.346	1369.33	2350.62	2097.51
67	20387.6	22214.7	27985.1	32095.9	41207.5	74198.8	137911	236613	210953										67	203.876	222.147	279.851	320.959	412.075	741.988	1379.11	2366.13	2109.53
68	20379	22216.5	28052.9	32086.3	41153.8	74756.5	138622	237652	212142										68	203.79	222.165	280.529	320.863	411.538	747.565	1386.22	2376.52	2121.42
69	20393.8	22200	28155.4	32217.1	41318	74882.9	139545	239316	214171										69	203.938	222	281.554	322.171	413.18	748.829	1395.45	2393.16	2141.71
70	20363.8	22233.1	28132.9	32272	41343.5	75581.9	140560	240445	215094										70	203.638	222.331	281.329	322.72	413.435	755.819	1405.6	2404.45	2150.94
71	20401.7	22245.9	28122.9	32307.1	41414.9	76033.8	141616	241553	216833										71	204.017	222.459	281.229	323.071	414.149	760.338	1416.16	2415.53	2168.33
72	20383.2	22259.6	28055.4	32254.7	41358.7	76382.4	142701	243200	218139										72	203.832	222.596	280.554	322.547	413.587	763.824	1427.01	2432	2181.39
73	20319.5	22284.8	28236.2	32493.6	41766.6	76836.2	143478	243777	219311										73	203.195	222.848	282.362	324.936	417.666	768.362	1434.78	2437.77	2193.11
74	20361.6	22291.7	28161.4	32224.9	41708.6	77130.7	144283	245151	220600										74	203.616	222.917	281.614	322.249	417.086	771.307	1442.83	2451.51	2206
75	20379	22233.4	28171.7	32383.9	41856.9	77786.8	145447	246423	221975										75	203.79	222.334	281.717	323.839	418.569	777.868	1454.47	2464.23	2219.75
76	20414.4	22318	28251.1	32423.2	41778.1	78041.1	146310	247685	223279										76	204.144	223.18	282.511	324.232	417.781	780.411	1463.1	2476.85	2232.79
77	20345.9	22314.3	28170.4	32549.9	41900	78684.8	147148	248849	224598										77	203.459	223.143	281.704	325.499	419	786.848	1471.48	2488.49	2245.98
78	20404.5	22225	28283.7	32645.7	42152.2	78916	148309	249824	226263										78	204.045	222.25	282.837	326.457	421.522	789.16	1483.09	2498.24	2262.63
79	20467.2	22295.8	28298.1	32591	42136.9	79494.2	148940	250886	227340										79	204.672	222.958	282.981	325.91	421.369	794.942	1489.4	2508.86	2273.4
80	20481.2	22281.6	28280.3	32670	42197.2	79692.5	149852	252118	228577										80	204.812	222.816	282.803	326.7	421.972	796.925	1498.52	2521.18	2285.77
81	20461	22363.2	28204.9	32678.1	42284.1	80145.2	150808	252985	229923										81	204.61	223.632	282.049	326.781	422.841	801.452	1508.08	2529.85	2299.23
82	20346.5	22295.4	28279	32741	42277.8	80580.5	151848	253935	230873										82	203.465	222.954	282.79	327.41	422.778	805.805	1518.47	2539.35	2308.73
83	20338.4	22327.2	28353.7	32832.3	42453.5	81050.4	152775	254963	231896										83	203.384	223.272	283.537	328.323	424.535	810.504	1527.75	2549.63	2318.96
84	20312.1	22301.5	28445.3	32827.2	42488	81558	153452	255903	233563										84	203.121	223.015	284.453	328.272	424.88	815.58	1534.52	2559.03	2335.63
85	20454.4	22334	28346.3	32877.4	42573.3	81778.9	154488	257232	234686										85	204.544	223.34	283.463	328.774	425.733	817.789	1544.88	2572.32	2346.86
86	20479.4	22185.7	28315.7	32814.6	42669.3	82519.8	155359	257799	236013										86	204.794	221.857	283.157	328.146	426.693	825.198	1553.59	2577.99	2360.13
87	20396.5	22361.4	28539	32923.9	42835.5	82820.8	156358	258942	237089										87	203.965	223.614	285.39	329.239	428.355	828.208	1563.58	2589.42	2370.89
88	20401.5	22301.9	28454.3	32976.6	42877.9	83208.8	157011	260044	238196										88	204.015	223.019	284.543	329.766	428.779	832.087	1570.11	2600.43	2381.96
89	20455.3	22425.6	28483.3	33067.8	43084	83346.7	157950	260578	239660										89	204.553	224.256	284.833	330.678	430.84	833.467	1579.5	2605.78	2396.6
90	20346.6	22344.2	28421.1	33116.1	43020.6	84025.8	158623	261686	240360										90	203.466	223.442	284.211	331.161	430.206	840.258	1586.23	2616.86	2403.6
91	20431	22358.7	28419	33205.1	43168.4	84511.1	159446	262765	242080										91	204.31	223.587	284.19	332.051	431.684	845.111	1594.46	2627.65	2420.8
92	20463.4	22324.6	28405.9	33184.4	43328.2	84915.1	160276	263698	243043										92	204.634	223.246	284.059	331.844	433.282	849.151	1602.76	2636.98	2430.43
93	20389.3	22331	28330.3	33163.9	43405.8	85323.6	160873	264352	244039										93	203.893	223.31	283.303	331.639	434.058	853.236	1608.73	2643.52	2440.39
94	20397.4	22439	28515.1	33329.6	43358	85788.2	161944	265294	245104										94	203.974	224.39	285.151	333.296	433.58	857.882	1619.44	2652.94	2451.03
95	20415.2	22341	28406.7	33316.3	43577.4	85952.6	162599	266027	246185										95	204.152	223.41	284.067	333.163	435.774	859.526	1625.99	2660.27	2461.85
96	20389.2	22348.9	28595.9	33228.7	43602.2	86538.4	163468	267030	247506										96	203.892	223.489	285.959	332.287	436.022	865.384	1634.68	2670.3	2475.06
97	20392.3	22309.1	28486.9	33379.4	43644.7	86975.4	164236	268092	248402										97	203.923	223.091	284.869	333.794	436.447	869.754	1642.36	2680.92	2484.02
98	20464.3	22356.3	28419.8	33390.8	43621.3	87406.1	165052	268694	249625										98	204.643	223.563	284.198	333.908	436.213	874.061	1650.52	2686.94	2496.25
99	20399.7	22304.8	28581	33424	43784.7	87716.8	165787	269936	250941										99	203.997	223.048	285.81	334.24	437.847	877.168	1657.87	2699.36	2509.41
100	20353	22423	28475	33432.7	43998.4	88033.8	166578	270022	251759										100	203.53	224.23	284.75	334.327	439.984	880.338	1665.78	2700.22	2517.59
101	20411.7	22330.2	28533.7	33422.6	44044.4	88614.8	167206	270888	252997										101	204.117	223.302	285.337	334.226	440.444	886.148	1672.06	2708.88	2529.97
102	20469	22376.5	28492.1	33488.8	44109.8	88908.5	168065	271760	253715										102	204.69	223.765	284.921	334.888	441.098	889.085	1680.65	2717.6	2537.15
103	20314.9	22429.2	28559.4	33568.3	44230	89223	168554	272616	255113										103	203.149	224.292	285.594	335.683	442.3	892.23	1685.54	2726.16	2551.13
104	20497.6	22447	28462.8	33598.5	44386.8	89544	169258	273810	255693										104	204.976	224.47	284.628	335.985	443.868	895.44	1692.58	2738.1	2556.93
105	20466.4	22378.5	28702.3	33662.4	44330.6	90071.1	170089	274367	257202										105	204.664	223.785	287.023	336.624	443.306	900.711	1700.89	2743.67	2572.02
106	20421	22500.5	28575.5	33721.1	44386.7	90610.2	170878	274839	257852										106	204.21	225.005	285.755	337.211	443.867	906.102	1708.78	2748.39	2578.52
107	20387.3	22441.6	28634.4	33786	44531.3	90869.7	171744	275576	259213										107	203.873	224.416	286.344	337.86	445.313	908.697	1717.44	2755.76	2592.13
108	20379.4	22419.8	28641	33824.2	44660.2	91223.1	172278	276144	259976										108	203.794	224.198	286.41	338.242	446.602	912.231	1722.78	2761.44	2599.76
109	20474	22339.1	28605.5	33782.4	44649	91689.8	173012	276968	260875										109	204.74	223.391	286.055	337.824	446.49	916.898	1730.12	2769.68	2608.75
110	20416.8	22290.2	28626.5	33843.2	44903.5	92316.9	173676	277726	261910										110	204.168	222.902	286.265	338.432	449.035	923.169	1736.76	2777.26	2619.1
111	20516.7	22391.6	28822	33800.4	44870.8	92542	174520	278634	262492										111	205.167	223.916	288.22	338.004	448.708	925.42	1745.2	2786.34	2624.92
112	20465.9	22448.8	28576.2	33934	44924.5	92949.3	175021	279017	263840										112	204.659	224.488	285.762	339.34	449.245	929.493	1750.21	2790.17	2638.4
113	20456.2	22352.5	28693.8	33909.6	45084.1	93389.9	175663	279714	264765										113	204.562	223.525	286.938	339.096	450.841	933.899	1756.63	2797.14	2647.65
114	20357.4	22422.3	28699.7	33979.8	45213.5	93873.8	176684	280522	265541										114	203.574	224.223	286.997	339.798	452.135	938.738	1766.84	2805.22	2655.41
115	20392.3	22476.4	28751.2	33916.7	45357.1	93949.6	177201	280822	266411										115	203.923	224.764	287.512	339.167	453.571	939.496	1772.01	2808.22	2664.11
116	20410.1	22434.9	28681.7	34091.7	45408	94219.7	177802	281573	267787										116	204.101	224.349	286.817	340.917	454.08	942.197	1778.02	2815.73	2677.87
117	20450.2	22492.6	28728.4	34150.6	45524.6	94736.4	178192	282550	268484										117	204.502	224.926	287.284	341.506	455.246	947.364	1781.92	2825.5	2684.84
118	20380.6	22443.9	28727.5	34031.8	45568.7	95286.6	178967	282661	269226										118	203.806	224.439	287.275	340.318	455.687	952.866	1789.67	2826.61	2692.26
119	20381.9	22475.2	28821.7	34171.8	45713.6	95690.5	179699	283386	270144										119	203.819	224.752	288.217	341.718	457.136	956.905	1796.99	2833.86	2701.43
120	20379	22452.6	28823.7	34259.1	45757.5	95896.8	180308	284035	270814										120	203.79	224.526	288.237	342.591	457.575	958.968	1803.08	2840.35	2708.14
121	20392.7	22407.4	28740.6	34202.8	45822.2	96275.3	180877	284615	271655										121	203.927	224.074	287.406	342.028	458.222	962.753	1808.77	2846.15	2716.55
122	20389.9	22352.4	28759.7	34165.3	45856.6	96634.8	181476	285184	273016										122	203.899	223.524	287.597	341.653	458.566	966.348	1814.76	2851.84	2730.16
123	20399.2	22396.6	28803.1	34279.7	45967.2	97218.1	182185	285766	273509										123	203.992	223.966	288.031	342.797	459.672	972.181	1821.85	2857.66	2735.09
124	20385.5	22420.4	28774.7	34370.2	46065.7	97657.4	182866	286325	274290										124	203.855	224.204	287.747	343.702	460.657	976.574	1828.66	2863.25	2742.9
125	20388.8	22415.8	28773.9	34191.5	46100.3	97774.3	183517	287236	275263										125	203.888	224.158	287.739	341.915	461.003	977.743	1835.17	2872.36	2752.63
126	20348.7	22434.2	28906.6	34217.7	46242.7	98291.2	183798	287334	276339										126	203.487	224.342	289.066	342.177	462.427	982.912	1837.98	2873.34	2763.39
127	20379	22485.4	28805.5	34428.2	46351.1	98454.8	184586	287965	276913										127	203.79	224.854	288.055	344.282	463.511	984.548	1845.86	2879.65	2769.13
128	20413	22523.2	28779.7	34399.9	46421.2	99022.2	184987	288922	277681										128	204.13	225.232	287.797	343.999	464.212	990.222	1849.87	2889.22	2776.81
129	20405.8	22489.3	28805.8	34467.8	46588.9	99414.3	185704	288865	278189										129	204.058	224.893	288.058	344.678	465.889	994.143	1857.04	2888.65	2781.89
130	20494.1	22461.5	28857.4	34585.3	46595.2	99725	186254	289715	279577										130	204.941	224.615	288.574	345.853	465.952	997.25	1862.54	2897.15	2795.77
131	20443.8	22607.3	28860.4	34650.1	46833.8	100019	186940	289978	279532										131	204.438	226.073	288.604	346.501	468.337	1000.19	1869.4	2899.78	2795.32
132	20410.8	22463.2	28888.4	34531	46856.2	100402	187424	290654	280944										132	204.108	224.632	288.884	345.31	468.562	1004.02	1874.24	2906.53	2809.44
133	20392.4	22531.7	28869	34594.9	46968.4	100917	188027	291151	281494										133	203.924	225.317	288.69	345.949	469.684	1009.17	1880.27	2911.51	2814.94
134	20458.1	22548.8	28809.7	34656.1	47055.7	101145	188686	291659	282367										134	204.581	225.488	288.097	346.561	470.557	1011.45	1886.87	2916.59	2823.67
135	20382.7	22428.2	28921.7	34648.2	47053.8	101572	189079	291982	283011										135	203.827	224.282	289.217	346.482	470.538	1015.72	1890.79	2919.82	2830.11
136	20357.1	22489	28973.7	34748.4	47201.7	101759	189560	292288	283601										136	203.571	224.89	289.737	347.484	472.017	1017.59	1895.6	2922.88	2836.01
137	20347.2	22472.5	28930	34714.2	47292.3	102147	190152	293077	284357										137	203.472	224.725	289.3	347.142	472.923	1021.47	1901.52	2930.77	2843.57
138	20305.7	22537.2	28807.9	34713	47449.1	102533	190647	293887	284982										138	203.057	225.372	288.079	347.13	474.491	1025.33	1906.47	2938.87	2849.82
139	20465.4	22419.6	28959	34686.2	47467.9	102871	191250	293871	285794										139	204.654	224.196	289.59	346.862	474.679	1028.71	1912.5	2938.71	2857.94
140	20420.5	22452.7	28976.6	34825.1	47558.3	103263	191828	294416	286451										140	204.205	224.527	289.766	348.251	475.583	1032.63	1918.28	2944.16	2864.51
141	20534.5	22475.4	29003.2	34841.5	47735.5	103422	192393	295099	286844										141	205.345	224.754	290.032	348.415	477.355	1034.22	1923.93	2950.99	2868.44
142	20403.8	22590.1	29007.6	34835.9	47793.3	103896	192570	295625	287987										142	204.038	225.901	290.076	348.359	477.933	1038.96	1925.7	2956.25	2879.87
143	20556.1	22515.5	28899.1	34930.7	47811.6	104118	193325	295712	288565										143	205.561	225.155	288.991	349.307	478.116	1041.18	1933.25	2957.12	2885.65
144	20372.5	22592.6	28966.1	34863.7	48025.6	104684	193811	296154	289097										144	203.725	225.926	289.661	348.637	480.256	1046.84	1938.11	2961.54	2890.97
145	20463.2	22489.1	28984.9	34924.6	48135.5	105085	194512	296356	289772										145	204.632	224.891	289.849	349.246	481.355	1050.85	1945.12	2963.57	2897.72
146	20481.9	22364.6	28971.5	34981.7	48296	105070	194649	296779	290570										146	204.819	223.646	289.715	349.817	482.96	1050.7	1946.49	2967.79	2905.7
147	20457	22494.7	29061	34979	48214.6	105601	195416	297256	291178										147	204.57	224.947	290.61	349.79	482.146	1056.01	1954.16	2972.56	2911.78
148	20436.6	22412.4	28935.9	35005.7	48316.9	105874	196009	297709	291717										148	204.366	224.124	289.359	350.057	483.169	1058.74	1960.09	2977.09	2917.17
149	20423.8	22455.3	29038.7	34978.1	48413.2	106312	196258	298547	292298										149	204.238	224.553	290.387	349.781	484.132	1063.12	1962.58	2985.47	2922.98
150	20487.8	22509.7	29082.2	35055	48623.4	106399	196606	298427	292919										150	204.878	225.097	290.822	350.55	486.234	1063.99	1966.06	2984.27	2929.19
151	20437.8	22492.2	29010.6	35150.7	48661	106903	197623	298867	293672										151	204.378	224.922	290.106	351.507	486.61	1069.03	1976.23	2988.67	2936.72
152	20500.4	22484.2	29041	35164.3	48742.3	107191	197814	299213	295779										152	205.004	224.842	290.41	351.643	487.423	1071.91	1978.14	2992.13	2957.79
153	20372.1	22535.8	29057.5	35132	48884.9	107612	198313	299808	295862										153	203.721	225.358	290.575	351.32	488.849	1076.12	1983.13	2998.08	2958.62
154	20384.7	22560.7	29085.2	35284.7	48829.1	108035	198674	299868	296730										154	203.847	225.607	290.852	352.847	488.291	1080.35	1986.74	2998.68	2967.3
155	20383.2	22580.7	28997	35134.4	48954.5	108309	199325	300444	297307										155	203.832	225.807	289.97	351.344	489.545	1083.09	1993.25	3004.44	2973.07
156	20505.6	22585.4	29041.7	35223.4	49012.7	108437	199450	300620	297636										156	205.056	225.854	290.417	352.234	490.127	1084.37	1994.5	3006.2	2976.36
157	20439.2	22504.2	29064.8	35449.7	49188.9	108699	200145	300893	297959										157	204.392	225.042	290.648	354.497	491.889	1086.99	2001.45	3008.93	2979.59
158	20429.6	22532.4	29044.1	35240.5	49296.9	109133	200562	301644	298950										158	204.296	225.324	290.441	352.405	492.969	1091.33	2005.62	3016.44	2989.5
159	20431.1	22599.5	29060.2	35304.6	49509.7	109417	200869	301662	299238										159	204.311	225.995	290.602	353.046	495.097	1094.17	2008.69	3016.62	2992.38
160	20346.8	22484.3	29094.5	35327.5	49587	109762	201466	302208	299859										160	203.468	224.843	290.945	353.275	495.87	1097.62	2014.66	3022.09	2998.59
161	20526.7	22471.3	29220.2	35347.3	49458.8	110125	202016	302378	300279										161	205.267	224.713	292.202	353.473	494.587	1101.25	2020.16	3023.78	3002.79
162	20534.4	22486.7	29267.6	35410.9	49612.9	110282	202207	302604	300862										162	205.344	224.867	292.676	354.109	496.129	1102.82	2022.07	3026.04	3008.62
163	20434.1	22534.7	29124.4	35468.2	49945.4	110777	202587	303270	301065										163	204.341	225.347	291.244	354.682	499.454	1107.77	2025.87	3032.7	3010.65
164	20475	22529.7	29077.1	35321.7	49842.9	111007	203206	303668	301376										164	204.75	225.297	290.771	353.217	498.429	1110.07	2032.06	3036.68	3013.76
165	20497.8	22590.9	29148	35501.3	49991.6	111250	203818	303891	302288										165	204.978	225.909	291.48	355.013	499.916	1112.5	2038.18	3038.91	3022.88
166	20470	22587.8	29194.8	35557.4	50073.3	111622	204201	303941	303089										166	204.7	225.878	291.948	355.574	500.733	1116.22	2042.01	3039.41	3030.89
167	20510.8	22509.2	29271.7	35510.4	50014.6	111751	204600	304308	303288										167	205.108	225.092	292.717	355.104	500.146	1117.51	2046	3043.08	3032.88
168	20416	22526	29210.7	35510.8	50361.5	112157	205260	304384	303915										168	204.16	225.26	292.107	355.108	503.615	1121.57	2052.6	3043.84	3039.15
169	20471	22547.9	29231.2	35547.4	50379	112408	205279	305005	304297										169	204.71	225.479	292.312	355.474	503.79	1124.08	2052.79	3050.05	3042.97
170	20402.2	22608.3	29251.4	35521.7	50444.2	112837	205821	304913	305110										170	204.022	226.083	292.514	355.217	504.442	1128.37	2058.21	3049.13	3051.1
171	20486.8	22542.5	29210.7	35679.3	50386.9	113142	206092	305373	305498										171	204.868	225.425	292.107	356.793	503.869	1131.42	2060.92	3053.73	3054.98
172	20443.9	22562.6	29121	35614.1	50584	113316	206430	305907	306017										172	204.439	225.626	291.21	356.141	505.84	1133.16	2064.3	3059.07	3060.17
173	20518.3	22563	29271.8	35572	50655.4	113760	207106	306110	306506										173	205.183	225.63	292.718	355.72	506.554	1137.6	2071.06	3061.1	3065.06
174	20538.6	22583.3	29134.5	35750	50634.3	113912	207515	306114	307011										174	205.386	225.833	291.345	357.5	506.343	1139.12	2075.15	3061.14	3070.11
175	20459.2	22570.5	29137	35856.3	50800.7	113949	207774	306497	307181										175	204.592	225.705	291.37	358.563	508.007	1139.49	2077.74	3064.97	3071.81
176	20531.9	22505.5	29213.1	35864.9	50962.1	114482	208444	307022	307342										176	205.319	225.055	292.131	358.649	509.621	1144.82	2084.44	3070.22	3073.43
177	20427	22595.7	29191.9	35793.6	51044.3	114621	208736	306964	307985										177	204.27	225.957	291.919	357.936	510.443	1146.21	2087.36	3069.64	3079.85
178	20422	22567.3	29224.2	35867.2	51136.5	115103	208914	307291	308518										178	204.22	225.673	292.242	358.672	511.365	1151.03	2089.14	3072.91	3085.18
179	20485.2	22574.6	29208.5	35870.2	51052.6	115506	209610	307538	309095										179	204.852	225.746	292.085	358.702	510.526	1155.06	2096.1	3075.38	3090.95
180	20551.9	22514.9	29346.1	35891.4	51471.2	115684	209890	308070	309107										180	205.519	225.149	293.461	358.914	514.712	1156.84	2098.9	3080.7	3091.07
181	20512.4	22593.3	29227.8	35984.5	51355.5	115898	210195	308312	309886										181	205.124	225.933	292.278	359.845	513.555	1158.98	2101.95	3083.12	3098.86
182	20408.4	22633.9	29333.4	35927.1	51629.9	116158	210452	308402	310306										182	204.084	226.339	293.334	359.271	516.299	1161.58	2104.52	3084.02	3103.06
183	20475.5	22658.8	29292.4	36062	51651.9	116349	210646	308588	310306										183	204.755	226.588	292.924	360.62	516.519	1163.49	2106.46	3085.88	3103.06
184	20513.8	22611.5	29331	36090	51695.9	116798	211330	309036	310754										184	205.138	226.115	293.31	360.9	516.959	1167.98	2113.3	3090.36	3107.54
185	20538.3	22477.9	29313	35952.3	51788.7	116988	211632	308806	311657										185	205.383	224.779	293.13	359.523	517.887	1169.88	2116.32	3088.06	3116.57
186	20521.5	22573	29202.1	36101.5	51995.1	117076	212207	309287	311867										186	205.215	225.73	292.021	361.015	519.951	1170.76	2122.07	3092.87	3118.67
187	20496.4	22653.3	29383.4	36031.2	51773.9	117368	212351	309715	312635										187	204.964	226.533	293.834	360.312	517.739	1173.68	2123.51	3097.15	3126.35
188	20575.3	22625.7	29383.4	36052.8	51963.3	117735	212572	309731	313249										188	205.753	226.257	293.834	360.528	519.633	1177.35	2125.72	3097.31	3132.49
189	20551.9	22624.8	29413.8	35996.9	52197.7	117939	213205	309914	313048										189	205.519	226.248	294.138	359.969	521.977	1179.39	2132.05	3099.14	3130.48
190	20446.4	22659.6	29458.2	36106.6	52155.6	118090	213339	310515	313537										190	204.464	226.596	294.582	361.066	521.556	1180.9	2133.39	3105.15	3135.37
191	20473.4	22535.2	29340	36005.3	52250.7	118430	213770	310691	313709										191	204.734	225.352	293.4	360.053	522.507	1184.3	2137.7	3106.91	3137.09
192	20469.1	22718.8	29425.8	36124.7	52287	118792	214156	310483	314136										192	204.691	227.188	294.258	361.247	522.87	1187.92	2141.56	3104.83	3141.36
193	20469.2	22602.4	29319.7	36209.2	52397.9	118912	214565	311130	314453										193	204.692	226.024	293.197	362.092	523.979	1189.12	2145.65	3111.3	3144.53
194	20527.3	22635.8	29442	36322.7	52587.9	119186	215016	311302	314709										194	205.273	226.358	294.42	363.227	525.879	1191.86	2150.16	3113.02	3147.09
195	20427.1	22565.1	29415.7	36215	52792.2	119513	215364	311735	315441										195	204.271	225.651	294.157	362.15	527.922	1195.13	2153.64	3117.35	3154.41
196	20410.5	22599.1	29456.8	36215.9	52748	119790	215363	311635	315500										196	204.105	225.991	294.568	362.159	527.48	1197.9	2153.63	3116.35	3155
197	20500.1	22671.6	29380.8	36376.1	52797.7	120077	215825	311658	315831										197	205.001	226.716	293.808	363.761	527.977	1200.77	2158.25	3116.58	3158.31
198	20423.1	22576.7	29366.5	36166	52937	120509	216088	312137	316120										198	204.231	225.767	293.665	361.66	529.37	1205.09	2160.88	3121.37	3161.2
199	20500.8	22542.5	29442.1	36268.4	53141.1	120508	216428	312409	316867										199	205.008	225.425	294.421	362.684	531.411	1205.08	2164.28	3124.09	3168.67
200	20409.3	22459.7	29433.5	36225.5	52979.9	120816	216724	312249	317189										200	204.093	224.597	294.335	362.255	529.799	1208.16	2167.24	3122.49	3171.89
201	20547.5	22679.9	29430.5	36342.5	53082.5	120950	216936	312659	317034										201	205.475	226.799	294.305	363.425	530.825	1209.5	2169.36	3126.59	3170.34
202	20450.9	22626.1	29414.4	36406.6	53112.9	121345	217561	313060	317250										202	204.509	226.261	294.144	364.066	531.129	1213.45	2175.61	3130.6	3172.5
203	20391.2	22535.6	29434.6	36424.7	53267.6	121508	217589	313269	317966										203	203.912	225.356	294.346	364.247	532.676	1215.08	2175.89	3132.69	3179.66
204	20490	22621.1	29523.9	36426.6	53537.4	121783	217834	313304	318092										204	204.9	226.211	295.239	364.266	535.374	1217.83	2178.34	3133.04	3180.92
205	20440.3	22737.2	29414.7	36334.5	53545.8	121755	218529	312977	318698										205	204.403	227.372	294.147	363.345	535.458	1217.55	2185.29	3129.77	3186.98
206	20438.7	22651.1	29488.4	36411.1	53633.1	122321	218865	313347	318723										206	204.387	226.511	294.884	364.111	536.331	1223.21	2188.65	3133.47	3187.23
207	20469	22741.1	29417.4	36419.7	53702.1	122342	219030	313417	318970										207	204.69	227.411	294.174	364.197	537.021	1223.42	2190.3	3134.17	3189.7
208	20523.7	22688.3	29435.4	36510.5	53558.2	122653	219412	313666	319303										208	205.237	226.883	294.354	365.105	535.582	1226.53	2194.12	3136.66	3193.03
209	20504.3	22532.6	29471.1	36396.6	53909.5	123161	219622	313789	319736										209	205.043	225.326	294.711	363.966	539.095	1231.61	2196.22	3137.89	3197.36
210	20498.6	22735.8	29527.2	36482.7	53743.9	122983	219665	314244	319950										210	204.986	227.358	295.272	364.827	537.439	1229.83	2196.65	3142.44	3199.5
211	20521.6	22628.9	29536.5	36504.1	54012.7	123302	220359	314396	320103										211	205.216	226.289	295.365	365.041	540.127	1233.02	2203.59	3143.96	3201.03
212	20440.2	22748.8	29568	36549.1	54034.7	123603	220517	314657	320520										212	204.402	227.488	295.68	365.491	540.347	1236.03	2205.17	3146.57	3205.2
213	20537.9	22546.2	29512.3	36601.2	54282	123620	220952	314471	320857										213	205.379	225.462	295.123	366.012	542.82	1236.2	2209.52	3144.71	3208.57
214	20594.3	22705.6	29559.5	36453.1	54320.2	123830	221552	315109	320776										214	205.943	227.056	295.595	364.531	543.202	1238.3	2215.52	3151.09	3207.76
215	20397.3	22589.7	29480	36631.9	54403.9	124167	221822	314809	320955										215	203.973	225.897	294.8	366.319	544.039	1241.67	2218.22	3148.09	3209.55
216	20496.3	22580.9	29547.2	36584.7	54406.1	124338	221637	315046	321538										216	204.963	225.809	295.472	365.847	544.061	1243.38	2216.37	3150.46	3215.38
217	20567.2	22761.5	29584.6	36663.3	54509.3	124768	222079	315122	321668										217	205.672	227.615	295.846	366.633	545.093	1247.68	2220.79	3151.22	3216.68
218	20547.3	22703.3	29540.9	36640.2	54675	124727	222253	315408	321602										218	205.473	227.033	295.409	366.402	546.75	1247.27	2222.53	3154.08	3216.02
219	20576.3	22585.9	29577.3	36614.1	54731.1	125074	222892	315357	322140										219	205.763	225.859	295.773	366.141	547.311	1250.74	2228.92	3153.57	3221.4
220	20494.9	22568.8	29598.7	36699.8	54675.2	125222	223198	315498	322280										220	204.949	225.688	295.987	366.998	546.752	1252.22	2231.98	3154.98	3222.8
221	20496.9	22673.1	29508.9	36749.9	54973.7	125470	223250	316075	322215										221	204.969	226.731	295.089	367.499	549.737	1254.7	2232.5	3160.75	3222.15
222	20492.2	22653.2	29587.6	36700.7	55011.8	125913	223686	316213	322602										222	204.922	226.532	295.876	367.007	550.118	1259.13	2236.86	3162.13	3226.02
223	20501.4	22696.2	29622.1	36760.3	55047.2	125951	223958	315740	322950										223	205.014	226.962	296.221	367.603	550.472	1259.51	2239.58	3157.4	3229.5
224	20512.3	22597.4	29530.9	36695.3	55238	126426	224040	316319	323366										224	205.123	225.974	295.309	366.953	552.38	1264.26	2240.4	3163.19	3233.66
225	20588.2	22712.5	29621.3	36902.7	55252.6	126288	224586	316545	323210										225	205.882	227.125	296.213	369.027	552.526	1262.88	2245.86	3165.45	3232.1
226	20471.1	22652.1	29615.5	36905.8	55206.7	126517	224469	316366	323639										226	204.711	226.521	296.155	369.058	552.067	1265.17	2244.69	3163.66	3236.39
227	20506.9	22668.5	29664.2	36796.4	55449.9	126849	224681	316619	323792										227	205.069	226.685	296.642	367.964	554.499	1268.49	2246.81	3166.19	3237.92
228	20400.1	22644.9	29610.6	36838.2	55506.4	126957	225352	316820	324017										228	204.001	226.449	296.106	368.382	555.064	1269.57	2253.52	3168.2	3240.17
229	20509.6	22646.9	29639.9	36898.6	55427.6	127233	225236	317140	324560										229	205.096	226.469	296.399	368.986	554.276	1272.33	2252.36	3171.4	3245.6
230	20518.6	22660.4	29492.1	36975.3	55707	127419	225741	317117	324655										230	205.186	226.604	294.921	369.753	557.07	1274.19	2257.41	3171.17	3246.55
231	20489.9	22658.3	29626	36876.9	55753.7	127802	225948	317197	324498										231	204.899	226.583	296.26	368.769	557.537	1278.02	2259.48	3171.97	3244.98
232	20471.5	22704	29566.3	36963.1	55814.2	127672	226254	317199	324884										232	204.715	227.04	295.663	369.631	558.142	1276.72	2262.54	3171.99	3248.84
233	20457.6	22729.6	29555.1	37104.7	55734.4	127852	226385	317258	325104										233	204.576	227.296	295.551	371.047	557.344	1278.52	2263.85	3172.58	3251.04
234	20516.3	22623.7	29556.2	37057.6	56055.2	128097	226727	317468	325194										234	205.163	226.237	295.562	370.576	560.552	1280.97	2267.27	3174.68	3251.94
235	20484.4	22603.3	29627.1	36908.6	55986.3	128404	226818	317578	325338										235	204.844	226.033	296.271	369.086	559.863	1284.04	2268.18	3175.78	3253.38
236	20497.7	22647.2	29700.6	37107.6	55997.6	128778	227163	317780	325562										236	204.977	226.472	297.006	371.076	559.976	1287.78	2271.63	3177.8	3255.62
237	20501.5	22736.1	29721.2	37116.1	56249.9	128765	227564	317971	326058										237	205.015	227.361	297.212	371.161	562.499	1287.65	2275.64	3179.71	3260.58
238	20542.6	22715.8	29583.4	36976.7	56201	128753	227795	317792	325981										238	205.426	227.158	295.834	369.767	562.01	1287.53	2277.95	3177.92	3259.81
239	20506.2	22620.9	29657.8	37054.9	56282	129135	228079	318123	325738										239	205.062	226.209	296.578	370.549	562.82	1291.35	2280.79	3181.23	3257.38
240	20549.2	22587.1	29678.6	37134.4	56471.8	129510	228128	317876	326219										240	205.492	225.871	296.786	371.344	564.718	1295.1	2281.28	3178.76	3262.19
241	20491.8	22686.8	29626.3	37109.1	56608	129291	228500	318201	326498										241	204.918	226.868	296.263	371.091	566.08	1292.91	2285	3182.01	3264.98
242	20534.1	22814.7	29692.8	37179.4	56419.1	129816	228804	318368	326543										242	205.341	228.147	296.928	371.794	564.191	1298.16	2288.04	3183.68	3265.43
243	20597.5	22742.2	29622.4	37162.5	56754.4	129906	228920	318356	326730										243	205.975	227.422	296.224	371.625	567.544	1299.06	2289.2	3183.57	3267.3
244	20529.8	22630.3	29703.5	37166.7	56738.1	130092	229195	318124	326841										244	205.298	226.303	297.035	371.667	567.381	1300.92	2291.95	3181.24	3268.41
245	20433.5	22748.9	29682.6	37252.7	56783.4	130210	229377	318728	327181										245	204.335	227.489	296.826	372.527	567.834	1302.1	2293.77	3187.28	3271.81
246	20429.3	22661.5	29635.4	37270	56857.6	130317	229856	318608	327492										246	204.293	226.615	296.354	372.7	568.576	1303.17	2298.56	3186.08	3274.92
247	20506.8	22725.3	29598.8	37282.3	56917	130534	230038	318933	327551										247	205.068	227.253	295.988	372.823	569.17	1305.34	2300.38	3189.33	3275.51
248	20502.6	22681.2	29628.8	37241.5	56857.8	130782	230268	319021	327613										248	205.026	226.812	296.288	372.415	568.578	1307.82	2302.68	3190.21	3276.13
249	20520.8	22633.8	29629.9	37334.2	57206	130841	230459	319157	328092										249	205.208	226.338	296.299	373.342	572.06	1308.41	2304.59	3191.57	3280.92
250	20434.7	22645	29701.5	37428.2	57106.9	130956	230649	319062	328396										250	204.347	226.45	297.015	374.282	571.069	1309.56	2306.49	3190.62	3283.96
251	20559.9	22714	29729.1	37352	57213.3	131191	230731	318887	328026										251	205.599	227.14	297.291	373.52	572.133	1311.91	2307.31	3188.87	3280.26
252	20487	22668	29714	37387.7	57279.9	131411	230859	318933	328198										252	204.87	226.68	297.14	373.877	572.799	1314.11	2308.59	3189.33	3281.98
253	20580.7	22702.7	29765.7	37418.6	57399.7	131411	231020	319598	328292										253	205.807	227.027	297.657	374.186	573.997	1314.11	2310.2	3195.98	3282.92
254	20623.4	22572.4	29695.5	37385.9	57421.3	132053	231158	319472	328618										254	206.234	225.724	296.955	373.859	574.213	1320.53	2311.58	3194.72	3286.18
255	20476	22614.7	29760.2	37452.4	57609.4	132170	231732	319510	328640										255	204.76	226.147	297.603	374.524	576.094	1321.7	2317.32	3195.1	3286.4
256	20531.4	22696.6	29681.6	37423.3	57456.3	132198	231731	319413	328945										256	205.314	226.966	296.816	374.233	574.563	1321.98	2317.31	3194.13	3289.45
257	20561.8	22723.9	29624.5	37510.5	57748.8	132205	232136	319318	329085										257	205.618	227.239	296.245	375.105	577.488	1322.05	2321.36	3193.18	3290.85
258	20545.7	22639.3	29785.7	37476.8	57782.7	132515	232370	319921	329157										258	205.457	226.393	297.857	374.768	577.827	1325.15	2323.7	3199.21	3291.57
259	20542.8	22715.6	29763.3	37457.2	58047.6	132860	232441	319554	329045										259	205.428	227.156	297.633	374.572	580.476	1328.6	2324.41	3195.54	3290.45
260	20534.2	22593	29682.7	37557.1	57960.9	132782	232782	320256	329351										260	205.342	225.93	296.827	375.571	579.609	1327.82	2327.82	3202.56	3293.51
261	20599.8	22647.5	29815.5	37593.2	58161.1	132955	232850	319864	329556										261	205.998	226.475	298.155	375.932	581.611	1329.55	2328.5	3198.64	3295.56
262	20618	22655.4	29792.9	37616	58105	133117	233019	320032	329685										262	206.18	226.554	297.929	376.16	581.05	1331.17	2330.19	3200.32	3296.85
263	20528	22709.1	29698.2	37494.3	58255	133568	233061	320096	329354										263	205.28	227.091	296.982	374.943	582.55	1335.68	2330.61	3200.96	3293.54
264	20542.9	22707.5	29823.6	37656.2	58287.7	133237	233595	320185	329437										264	205.429	227.075	298.236	376.562	582.877	1332.37	2335.95	3201.85	3294.37
265	20614.3	22658.6	29749	37667.5	58528.6	133654	233939	320294	330106										265	206.143	226.586	297.49	376.675	585.286	1336.54	2339.39	3202.93	3301.06
266	20599.2	22779.2	29768.7	37667.7	58520.1	133933	233793	320286	330146										266	205.992	227.792	297.687	376.677	585.201	1339.33	2337.93	3202.86	3301.46
267	20568.6	22763.1	29794.8	37670	58483.5	134048	234217	320638	330057										267	205.686	227.631	297.948	376.7	584.835	1340.48	2342.17	3206.38	3300.57
268	20534.8	22712.8	29936.2	37659.1	58601.8	134016	234734	320530	330280										268	205.348	227.128	299.362	376.591	586.018	1340.16	2347.34	3205.3	3302.8
269	20570.3	22657.5	29824.7	37706.8	58609.2	134460	234701	320664	330619										269	205.703	226.575	298.247	377.068	586.092	1344.6	2347.01	3206.64	3306.19
270	20583.1	22623.3	29727.5	37682.4	58643.8	134631	234856	320391	330486										270	205.831	226.233	297.275	376.824	586.438	1346.31	2348.56	3203.91	3304.86
271	20503.2	22617.6	29787.6	37872.1	58910.1	134795	235053	320492	330604										271	205.032	226.176	297.876	378.721	589.101	1347.95	2350.53	3204.92	3306.04
272	20569	22655.4	29855	37764.6	59144.8	134648	235540	320786	330624										272	205.69	226.554	298.55	377.646	591.448	1346.48	2355.4	3207.86	3306.24
273	20527.5	22709	29814.5	37718.9	58888.8	135071	235346	320888	330783										273	205.275	227.09	298.145	377.189	588.888	1350.71	2353.46	3208.88	3307.83
274	20574.6	22585.8	29697.9	37778.4	58954.1	135175	235648	321150	330718										274	205.746	225.858	296.979	377.784	589.541	1351.75	2356.48	3211.5	3307.18
275	20510.3	22659.6	29949.8	37853.5	59046.9	135240	235726	320882	331485										275	205.103	226.596	299.498	378.535	590.469	1352.4	2357.26	3208.82	3314.85
276	20597.9	22650	29792.1	37844.2	59151.1	135409	235943	321161	330969										276	205.979	226.5	297.921	378.442	591.511	1354.09	2359.43	3211.61	3309.69
277	20549.8	22697.6	29699.2	37913	59159	135723	235932	320962	330928										277	205.498	226.976	296.992	379.13	591.59	1357.23	2359.32	3209.62	3309.28
278	20573.6	22690.5	29798.3	37956.4	59401.9	135552	236459	320929	331183										278	205.736	226.905	297.983	379.564	594.019	1355.52	2364.59	3209.29	3311.83
279	20470.2	22748	29717.4	38048.3	59384.1	135987	236526	321215	331484										279	204.702	227.48	297.174	380.483	593.841	1359.87	2365.26	3212.15	3314.84
280	20463.6	22709.5	29731.7	38045.2	59353.1	136112	236650	320901	331311										280	204.636	227.095	297.317	380.452	593.531	1361.12	2366.5	3209.01	3313.11
281	20556	22690	29832.4	37997.1	59573.1	136424	236920	320875	331518										281	205.56	226.9	298.324	379.971	595.731	1364.24	2369.2	3208.75	3315.18
282	20493.2	22785.9	29920.9	37948.6	59539.8	136322	237116	321103	331674										282	204.932	227.859	299.209	379.486	595.398	1363.22	2371.16	3211.03	3316.74
283	20572.7	22763.1	29880.5	38074.6	59628.7	136347	237129	321371	331754										283	205.727	227.631	298.805	380.746	596.287	1363.47	2371.29	3213.71	3317.54
284	20517	22710.6	29913.4	37949.5	59759	136579	237219	321340	331838										284	205.17	227.106	299.134	379.495	597.59	1365.79	2372.19	3213.4	3318.38
285	20476.6	22666.2	29826.9	38049.6	59805.4	136797	237528	321562	331929										285	204.766	226.662	298.269	380.496	598.054	1367.97	2375.28	3215.62	3319.29
286	20593.2	22723.4	29901.8	38030.1	59956.3	136960	237850	321573	332140										286	205.932	227.234	299.018	380.301	599.563	1369.6	2378.5	3215.73	3321.4
287	20559.1	22731.7	29808.7	38051.9	60022.7	137043	238029	321561	331751										287	205.591	227.317	298.087	380.519	600.227	1370.43	2380.29	3215.61	3317.51
288	20465.6	22784	29810.9	38112.7	59991	137133	238007	321486	332283										288	204.656	227.84	298.109	381.127	599.91	1371.33	2380.07	3214.86	3322.83
289	20466.5	22741.2	29907	38207.9	60104	137454	238274	321972	332188										289	204.665	227.412	299.07	382.079	601.04	1374.54	2382.74	3219.72	3321.88
290	20537.4	22710.3	29883.7	38103	60232.3	137769	238490	321729	332371										290	205.374	227.103	298.837	381.03	602.323	1377.69	2384.9	3217.29	3323.71
291	20488.8	22645.8	29753.2	38024.9	60373.7	137486	238439	321625	332379										291	204.888	226.458	297.532	380.249	603.737	1374.86	2384.39	3216.25	3323.79
292	20620.1	22850.9	29907.6	38034.5	60380.9	137710	238644	321683	332156										292	206.201	228.509	299.076	380.345	603.809	1377.1	2386.44	3216.83	3321.57
293	20472.6	22738.1	29846.1	38173.5	60484.7	138062	239126	322180	332505										293	204.726	227.381	298.461	381.735	604.847	1380.62	2391.26	3221.8	3325.05
294	20560.5	22713	29864.8	38297.6	60338.1	138073	239131	322095	332398										294	205.605	227.13	298.648	382.976	603.381	1380.73	2391.31	3220.95	3323.98
295	20582.9	22773.3	29916.1	38189	60661.6	137995	239413	321885	332902										295	205.829	227.733	299.161	381.89	606.616	1379.95	2394.13	3218.85	3329.02
296	20499.9	22775.3	29937	38227.2	60490.5	138277	239498	321840	332362										296	204.999	227.753	299.37	382.272	604.905	1382.77	2394.98	3218.4	3323.62
297	20559.7	22796.2	29963.7	38391.6	60720.4	138669	239814	321789	332967										297	205.597	227.962	299.637	383.916	607.204	1386.69	2398.14	3217.89	3329.67
298	20632.9	22737.6	29793.1	38348.9	60722.1	138672	239660	322235	332608										298	206.329	227.376	297.931	383.489	607.221	1386.72	2396.6	3222.35	3326.08
299	20518.9	22676.9	29966.5	38248.1	60749.6	138826	239780	321786	332819										299	205.189	226.769	299.665	382.481	607.496	1388.26	2397.8	3217.86	3328.19
300	20587.8	22861.2	29978.6	38459.1	60815.9	138741	240105	322093	332384										300	205.878	228.612	299.786	384.591	608.159	1387.41	2401.05	3220.93	3323.84
301	20559.2	22683.4	29864	38399.4	60923.4	138981	240238	322220	332819										301	205.592	226.834	298.64	383.994	609.234	1389.81	2402.38	3222.2	3328.19
302	20595.9	22700.5	29859.6	38477.5	61055.1	139169	240780	322468	333488										302	205.959	227.005	298.596	384.775	610.551	1391.69	2407.8	3224.68	3334.88
303	20587	22650.2	29892.7	38449.6	61013.7	139530	240386	322304	333123										303	205.87	226.502	298.927	384.496	610.137	1395.3	2403.86	3223.04	3331.23
304	20605.1	22736.3	29961.2	38442.3	61206.9	139542	240674	322280	333467										304	206.051	227.363	299.612	384.423	612.069	1395.42	2406.74	3222.8	3334.67
305	20544.9	22725.6	30019.8	38465.5	61244.5	139571	240762	322455	332839										305	205.449	227.256	300.198	384.655	612.445	1395.71	2407.62	3224.55	3328.39
306	20504.5	22782.2	29949.1	38518.5	61286.4	139629	241338	322184	333206										306	205.045	227.822	299.491	385.185	612.864	1396.29	2413.38	3221.84	3332.06
307	20648.6	22779	29962.2	38529.3	61392.5	139898	240770	322432	333516										307	206.486	227.79	299.622	385.293	613.925	1398.98	2407.7	3224.32	3335.16
308	20545.9	22722.2	29926.5	38595.3	61198.1	140179	241089	322407	333324										308	205.459	227.222	299.265	385.953	611.981	1401.79	2410.89	3224.07	3333.24
309	20543.6	22680.6	29898.7	38447.4	61523.5	139988	241606	322413	333472										309	205.436	226.806	298.987	384.474	615.235	1399.88	2416.06	3224.13	3334.72
310	20533	22673.4	30026.6	38635.8	61453.6	140291	241615	322760	333438										310	205.33	226.734	300.266	386.358	614.536	1402.91	2416.15	3227.6	3334.38
311	20565.1	22675.7	29958	38646.6	61548.7	140453	241814	322555	333255										311	205.651	226.757	299.58	386.466	615.487	1404.53	2418.14	3225.55	3332.55
312	20524.5	22641.6	29927	38564	61711.2	140532	242019	322584	333645										312	205.245	226.416	299.27	385.64	617.112	1405.32	2420.19	3225.84	3336.45
313	20539.1	22703.9	29976.9	38643.6	61856.9	140539	242161	322654	333778										313	205.391	227.039	299.769	386.436	618.569	1405.39	2421.61	3226.54	3337.78
314	20612.1	22718	29968.2	38681.2	61754.3	140706	242231	322695	333664										314	206.121	227.18	299.682	386.812	617.543	1407.06	2422.31	3226.95	3336.64
315	20510.2	22748.2	30000.6	38574.8	62069.2	140906	242181	322377	333872										315	205.102	227.482	300.006	385.748	620.692	1409.06	2421.81	3223.77	3338.72
316	20608.8	22679.4	30032.8	38641.7	61764.3	141061	242750	322191	333717										316	206.088	226.794	300.328	386.417	617.643	1410.61	2427.5	3221.91	3337.17
317	20558.7	22681.1	29998.4	38731.5	61945	141093	242656	322576	333705										317	205.587	226.811	299.984	387.315	619.45	1410.93	2426.56	3225.76	3337.05
318	20616.7	22842.9	30003.5	38855.2	62030.7	141202	242681	322628	334009										318	206.167	228.429	300.035	388.552	620.307	1412.02	2426.81	3226.28	3340.09
319	20514.8	22638.1	29916.3	38835.1	62080.2	141383	242954	322799	333737										319	205.148	226.381	299.163	388.351	620.802	1413.83	2429.54	3227.99	3337.37
320	20597.9	22805.2	29995.9	38633.1	62119.6	141672	243053	322737	333903										320	205.979	228.052	299.959	386.331	621.196	1416.72	2430.53	3227.37	3339.03
321	20514.9	22659.7	30005.5	38811.2	62247.4	141715	243464	323111	333855										321	205.149	226.597	300.055	388.112	622.474	1417.15	2434.64	3231.11	3338.55
322	20523.9	22695.9	30020	38709.3	62329.3	141675	243572	322881	334196										322	205.239	226.959	300.2	387.093	623.293	1416.75	2435.72	3228.81	3341.97
323	20582.6	22713.2	29997.4	38761.4	62550.9	141824	243529	322985	334132										323	205.826	227.132	299.974	387.614	625.509	1418.24	2435.29	3229.85	3341.32
324	20469.8	22801.8	29964.6	38827.9	62475.5	141944	243538	322695	334011										324	204.698	228.018	299.646	388.279	624.755	1419.44	2435.38	3226.95	3340.11
325	20528.8	22730	30005.4	38817.3	62601.9	142034	243925	322746	334277										325	205.288	227.3	300.054	388.173	626.019	1420.34	2439.25	3227.46	3342.77
326	20702.8	22708.8	30114.8	38883.2	62470.4	142383	244120	322956	333590										326	207.028	227.088	301.148	388.832	624.704	1423.83	2441.2	3229.56	3335.9
327	20598.8	22711.8	29999.2	38807.3	62522.4	142498	244066	322896	334049										327	205.988	227.118	299.992	388.073	625.224	1424.98	2440.66	3228.96	3340.49
328	20634.9	22730.6	30062.5	38927.5	62695.8	142252	244442	322960	334352										328	206.349	227.306	300.625	389.275	626.958	1422.52	2444.43	3229.6	3343.52
329	20499.4	22766.1	30111.3	38898.3	62697.7	142499	244381	322948	333973										329	204.994	227.661	301.113	388.983	626.977	1424.99	2443.81	3229.48	3339.73
330	20631.2	22728.7	30154.8	38823.9	62766.8	142521	244347	322829	334042										330	206.312	227.287	301.548	388.239	627.668	1425.21	2443.47	3228.29	3340.42
331	20554.9	22709.5	29908.5	38931.9	63027.2	142749	244630	322689	334509										331	205.549	227.095	299.085	389.319	630.273	1427.49	2446.3	3226.89	3345.09
332	20529.7	22654.6	30067.3	38990.2	62907	142682	244767	323023	334278										332	205.297	226.546	300.673	389.902	629.07	1426.82	2447.67	3230.23	3342.78
333	20626.3	22690.6	30094.5	38921.2	63092.8	143029	244733	322680	334359										333	206.263	226.906	300.945	389.212	630.928	1430.29	2447.33	3226.8	3343.59
334	20567.9	22741.1	30087.4	39070.1	63129.4	143219	244815	323131	334224										334	205.679	227.411	300.874	390.701	631.294	1432.19	2448.15	3231.31	3342.24
335	20633	22706.6	30078.3	39073.1	63053.4	143206	244983	323100	334326										335	206.33	227.066	300.783	390.731	630.534	1432.06	2449.83	3231	3343.26
336	20529.8	22749.9	30059	39132.5	63183.7	143227	245228	322590	334390										336	205.298	227.499	300.59	391.325	631.837	1432.27	2452.28	3225.9	3343.9
337	20617.5	22674.1	29910.8	39150	63233.7	143562	245142	322761	334547										337	206.175	226.741	299.108	391.5	632.337	1435.62	2451.42	3227.61	3345.47
338	20545.8	22650.5	30058.3	39018.7	63301.4	143500	245459	322701	334432										338	205.458	226.505	300.583	390.187	633.014	1435	2454.59	3227.01	3344.32
339	20517.7	22740.7	30138.7	38994.6	63388.7	143576	245423	322936	334561										339	205.177	227.407	301.387	389.946	633.887	1435.76	2454.23	3229.36	3345.61
340	20465.4	22755.7	30115.1	39038.9	63403.5	143655	245776	322951	334723										340	204.654	227.557	301.151	390.389	634.035	1436.55	2457.76	3229.51	3347.23
341	20582.2	22745.1	30170.1	39197.4	63602.9	144026	245894	322960	334168										341	205.822	227.451	301.701	391.974	636.029	1440.26	2458.94	3229.6	3341.68
342	20584.7	22771.7	30106.7	39056.3	63528.9	144089	246039	322999	334505										342	205.847	227.717	301.067	390.563	635.289	1440.89	2460.39	3229.99	3345.05
343	20484.3	22776	30114.1	39212.8	63678.9	143979	245951	323178	334453										343	204.843	227.76	301.141	392.127	636.789	1439.79	2459.51	3231.78	3344.53
344	20540	22818.5	30085.3	39282.6	63463.3	144158	246371	322830	334344										344	205.4	228.185	300.853	392.826	634.633	1441.58	2463.71	3228.3	3343.43
345	20549	22778.1	30124.6	39193	63657.3	144004	246245	322944	334723										345	205.49	227.781	301.246	391.93	636.573	1440.04	2462.45	3229.44	3347.23
346	20597.2	22781.9	30059	39287.4	63721.5	144555	246459	322709	333970										346	205.972	227.819	300.59	392.874	637.215	1445.55	2464.59	3227.09	3339.7
347	20495.3	22746.4	30027.4	39371.3	63798.8	144405	246792	323258	334929										347	204.953	227.464	300.274	393.713	637.988	1444.05	2467.92	3232.58	3349.29
348	20648.7	22825.9	30127.3	39240.4	63944.2	144314	246399	323402	335012										348	206.487	228.259	301.273	392.404	639.442	1443.14	2463.99	3234.02	3350.12
349	20581.8	22688.2	30134.3	39316.9	64012.4	144575	246822	322811	335061										349	205.818	226.882	301.343	393.169	640.124	1445.75	2468.22	3228.11	3350.61
350	20528.3	22852.7	30054.2	39399.9	63951.8	144508	247344	322932	334834										350	205.283	228.527	300.542	393.999	639.518	1445.08	2473.44	3229.32	3348.34
351	20595	22781.8	30073.8	39309	64117	144807	246894	323149	334819										351	205.95	227.818	300.738	393.09	641.17	1448.07	2468.94	3231.49	3348.19
352	20540.9	22742.3	30086.1	39307	64120.3	144483	247145	323161	334923										352	205.409	227.423	300.861	393.07	641.203	1444.83	2471.45	3231.61	3349.23
353	20638.6	22724.9	30119.5	39390.2	64353.6	144799	247131	323173	334823										353	206.386	227.249	301.195	393.902	643.536	1447.99	2471.31	3231.73	3348.23
354	20561.4	22717	30289	39400.2	64316.3	145117	247059	322748	334555										354	205.614	227.17	302.89	394.002	643.163	1451.17	2470.59	3227.48	3345.55
355	20577.1	22895.8	30140.4	39420.8	64338.4	145147	247314	322851	334638										355	205.771	228.958	301.404	394.208	643.384	1451.47	2473.14	3228.51	3346.38
356	20551.5	22677.7	30102.4	39403.7	64464.6	145088	247775	323003	334805										356	205.515	226.777	301.024	394.037	644.646	1450.88	2477.75	3230.03	3348.05
357	20482.4	22800.8	30110.7	39451.5	64520.1	145498	247886	323158	335221										357	204.824	228.008	301.107	394.515	645.201	1454.98	2478.86	3231.59	3352.21
358	20519.6	22660	30082.8	39463.8	64553.4	145570	247568	322747	334698										358	205.196	226.6	300.828	394.638	645.534	1455.7	2475.68	3227.47	3346.98
359	20537	22689.8	30175.3	39468.9	64593.5	145526	247660	322856	334911										359	205.37	226.898	301.753	394.689	645.935	1455.26	2476.6	3228.56	3349.11
360	20545	22847.7	30073	39537.5	64715.8	145735	248032	322967	334842										360	205.45	228.477	300.73	395.375	647.158	1457.35	2480.32	3229.67	3348.43
361	20580.3	22739.4	30102.9	39490.7	64687.6	145722	248066	323068	335090										361	205.803	227.394	301.029	394.907	646.876	1457.22	2480.66	3230.68	3350.9
362	20564.5	22825.8	30135.2	39640.1	64728	146088	248240	323024	334905										362	205.645	228.258	301.352	396.401	647.28	1460.88	2482.4	3230.24	3349.05
363	20556.5	22819.6	30137.5	39487.9	64808.5	145742	248117	322963	334956										363	205.565	228.196	301.375	394.879	648.085	1457.42	2481.17	3229.63	3349.56
364	20632.7	22777.2	30180.3	39569.1	64857.3	146011	248206	323221	334903										364	206.327	227.772	301.803	395.691	648.573	1460.11	2482.06	3232.21	3349.03
365	20590.1	22673.6	30160.5	39680.6	64867.6	146230	248434	323107	334992										365	205.901	226.736	301.605	396.806	648.676	1462.3	2484.34	3231.07	3349.92
366	20544.2	22851.3	30280.1	39586.8	64929.9	146202	248710	322869	334883										366	205.442	228.513	302.801	395.868	649.299	1462.02	2487.1	3228.69	3348.83
367	20583.3	22764.5	30119.4	39727.6	65124.3	146343	248563	323183	334820										367	205.833	227.645	301.194	397.276	651.243	1463.43	2485.63	3231.83	3348.2
368	20603.8	22778.3	30205.6	39529	65000.7	146311	248943	323318	335111										368	206.038	227.783	302.056	395.29	650.007	1463.11	2489.43	3233.18	3351.11
369	20537.9	22839.4	30269.5	39679.2	65111.6	146606	249007	323159	334936										369	205.379	228.394	302.695	396.792	651.116	1466.07	2490.07	3231.59	3349.36
370	20635.7	22782.5	30190.4	39659.4	65262.6	146634	249066	322723	334977										370	206.357	227.825	301.904	396.594	652.626	1466.34	2490.66	3227.23	3349.77
371	20564.9	22694.9	30217.9	39748.6	65288.5	146390	249104	322825	335118										371	205.649	226.949	302.179	397.486	652.885	1463.9	2491.04	3228.25	3351.18
372	20530.8	22650.4	30217.6	39852.3	65304.6	146707	249354	323074	335047										372	205.308	226.504	302.176	398.523	653.046	1467.07	2493.54	3230.74	3350.47
373	20569.1	22806.3	30300.2	39932.9	65330.9	146674	249103	322871	335033										373	205.691	228.063	303.002	399.329	653.309	1466.74	2491.03	3228.71	3350.33
374	20427.1	22869.4	30252.2	39834.7	65429.9	147101	249201	322804	335237										374	204.271	228.694	302.522	398.347	654.299	1471.01	2492.01	3228.04	3352.37
375	20451.1	22760.9	30244.7	39765.5	65479.7	146894	249356	322940	335319										375	204.511	227.609	302.447	397.655	654.797	1468.94	2493.56	3229.4	3353.19
376	20617.4	22771.5	30221.4	39698.6	65504.7	147007	249461	322847	334969										376	206.174	227.715	302.214	396.986	655.047	1470.07	2494.61	3228.47	3349.69
377	20491.4	22697.2	30213.1	39855.1	65578.5	147122	249717	322917	335326										377	204.914	226.972	302.131	398.551	655.785	1471.22	2497.17	3229.17	3353.26
378	20591.5	22746.1	30195.9	39875.3	65591.6	146993	249564	323019	334741										378	205.915	227.461	301.959	398.753	655.916	1469.93	2495.64	3230.19	3347.41
379	20521.5	22743.8	30149.5	39857.4	65656.4	147280	249788	322590	335183										379	205.215	227.438	301.495	398.574	656.564	1472.8	2497.88	3225.9	3351.83
380	20497.3	22779.8	30279.8	39838.5	65655.2	147279	250045	323080	335167										380	204.973	227.798	302.798	398.385	656.552	1472.79	2500.45	3230.8	3351.67
381	20642.8	22750.5	30181	39862.6	65741	147529	250139	322701	335410										381	206.428	227.505	301.81	398.626	657.41	1475.29	2501.39	3227.01	3354.1
382	20605.6	22640.7	30231.2	39969.5	65757.9	147495	250055	322694	334875										382	206.056	226.407	302.312	399.695	657.579	1474.95	2500.55	3226.94	3348.75
383	20593.4	22755.7	30188	40124.4	65967.2	147461	250197	322787	334995										383	205.934	227.557	301.88	401.244	659.672	1474.61	2501.97	3227.87	3349.95
384	20624.2	22730.2	30226.7	40004.4	65924.8	147790	250292	322551	334786										384	206.243	227.302	302.267	400.044	659.248	1477.9	2502.92	3225.51	3347.86
385	20570.8	22831	30241.8	39895.6	65889.6	147628	250508	323019	335150										385	205.708	228.31	302.418	398.956	658.896	1476.28	2505.08	3230.19	3351.5
386	20622.2	22704	30272.2	39932.5	65848.7	147859	250382	322986	335628										386	206.222	227.04	302.722	399.325	658.487	1478.59	2503.82	3229.86	3356.28
387	20639.9	22798.9	30256.9	39981.2	66099.8	147880	250778	322527	335295										387	206.399	227.989	302.569	399.812	660.998	1478.8	2507.78	3225.27	3352.95
388	20561	22770.9	30357.4	39901.5	66139.9	147737	250671	322789	335018										388	205.61	227.709	303.574	399.015	661.399	1477.37	2506.71	3227.89	3350.18
389	20606.7	22761.1	30215.2	40022.1	66107.8	148273	250738	322775	335411										389	206.067	227.611	302.152	400.221	661.078	1482.73	2507.38	3227.75	3354.11
390	20531.8	22696	30242.2	40073.9	66123.6	148201	250729	322576	335159										390	205.318	226.96	302.422	400.739	661.236	1482.01	2507.29	3225.76	3351.59
391	20499.4	22801.8	30351.4	40160.7	66246.1	148415	250900	322966	335033										391	204.994	228.018	303.514	401.607	662.461	1484.15	2509	3229.66	3350.33
392	20517.3	22735.3	30285.2	40218.5	66334.1	148413	250974	322745	334804										392	205.173	227.353	302.852	402.185	663.341	1484.13	2509.74	3227.45	3348.04
393	20512.5	22698.7	30344.5	40045.2	66513.3	148491	251126	322920	335172										393	205.125	226.987	303.445	400.452	665.133	1484.91	2511.26	3229.2	3351.72
394	20550.7	22733.4	30490.3	40193.4	66493.3	148503	251053	322604	335153										394	205.507	227.334	304.903	401.934	664.933	1485.03	2510.53	3226.04	3351.53
395	20631	22756.8	30256.6	40131.3	66517.5	148689	251409	322716	334997										395	206.31	227.568	302.566	401.313	665.175	1486.89	2514.09	3227.16	3349.97
396	20623.2	22685.2	30342.8	40084.1	66627.9	148626	251391	322872	335640										396	206.232	226.852	303.428	400.841	666.279	1486.26	2513.91	3228.72	3356.41
397	20593.2	22740.3	30251.6	40033.4	66583.6	148969	251281	322668	334946										397	205.932	227.403	302.516	400.334	665.836	1489.69	2512.81	3226.68	3349.46
398	20546.5	22795.1	30377.4	40174.9	66656.9	148961	251698	322619	335029										398	205.465	227.951	303.774	401.749	666.569	1489.61	2516.98	3226.19	3350.29
399	20554.4	22694.9	30303.2	40207.9	66793.4	149111	251355	322457	335239										399	205.544	226.949	303.032	402.079	667.934	1491.11	2513.55	3224.57	3352.39
400	20590.2	22671.4	30339.4	40080	66521.6	149046	251508	322496	335004										400	205.902	226.714	303.394	400.8	665.216	1490.46	2515.08	3224.96	3350.04
401	20490.7	22720.7	30285.6	40287.5	66752	149273	251763	322491	334885										401	204.907	227.207	302.856	402.875	667.52	1492.73	2517.63	3224.91	3348.85
402	20506	22752.5	30401.1	40234.4	66927.5	149137	251792	322616	334825										402	205.06	227.525	304.011	402.344	669.275	1491.37	2517.92	3226.16	3348.25
403	20522.2	22720.1	30277.1	40264.8	66979.2	149264	252038	322522	334964										403	205.222	227.201	302.771	402.648	669.792	1492.64	2520.38	3225.22	3349.64
404	20658.5	22785.2	30219	40201.3	66906.6	149104	252018	322714	335143										404	206.585	227.852	302.19	402.013	669.066	1491.04	2520.18	3227.14	3351.43
405	20652.2	22751.7	30342	40353.2	67018.8	149170	252043	322584	335143										405	206.522	227.517	303.42	403.532	670.188	1491.7	2520.43	3225.84	3351.43
406	20525.3	22723.8	30346.3	40412.3	66991.1	149372	252094	322600	335110										406	205.253	227.238	303.463	404.123	669.911	1493.72	2520.94	3226	3351.1
407	20558.1	22787.2	30301.3	40469.2	67192.4	149459	252064	322290	335126										407	205.581	227.872	303.013	404.692	671.924	1494.59	2520.64	3222.9	3351.26
408	20655	22843.8	30308.5	40338.3	67190.4	149344	252472	322574	335049										408	206.55	228.438	303.085	403.383	671.904	1493.44	2524.72	3225.74	3350.49
409	20652.3	22712.2	30236.5	40463.3	66981.8	149799	252459	322588	334960										409	206.523	227.122	302.365	404.633	669.817	1497.99	2524.59	3225.88	3349.6
410	20491	22725.1	30391	40375.4	67175.5	149645	252484	322221	335068										410	204.91	227.251	303.91	403.754	671.755	1496.45	2524.84	3222.21	3350.68
411	20625.6	22717.4	30356	40449.6	67305	149722	252578	322359	334868										411	206.256	227.174	303.56	404.496	673.05	1497.22	2525.78	3223.59	3348.68
412	20552.7	22699.6	30384.2	40421.2	67347.6	149594	252604	322518	335053										412	205.527	226.996	303.842	404.212	673.476	1495.94	2526.04	3225.18	3350.53
413	20471.2	22760.6	30286.4	40477.2	67284.7	149921	252557	322115	335089										413	204.712	227.606	302.864	404.772	672.847	1499.21	2525.57	3221.15	3350.89
414	20544.6	22837.4	30334	40462.2	67518.3	149902	253022	322511	335119										414	205.446	228.374	303.34	404.622	675.183	1499.02	2530.22	3225.11	3351.19
415	20616.7	22908.6	30385.8	40445.2	67590.7	150006	252880	322238	334986										415	206.167	229.086	303.858	404.452	675.907	1500.06	2528.8	3222.38	3349.86
416	20544.6	22769.8	30395.8	40528.4	67446.5	150063	252802	322870	334671										416	205.446	227.698	303.958	405.284	674.465	1500.63	2528.02	3228.7	3346.71
417	20524	22741.4	30358.7	40456.5	67438.9	150052	253097	322336	334881										417	205.24	227.414	303.587	404.565	674.389	1500.52	2530.97	3223.36	3348.81
418	20578.5	22801	30316.3	40611.8	67656.4	150153	252901	322338	335325										418	205.785	228.01	303.163	406.118	676.564	1501.53	2529.01	3223.38	3353.25
419	20497.1	22745.4	30399.5	40590.1	67615.5	150451	253240	322341	334986										419	204.971	227.454	303.995	405.901	676.155	1504.51	2532.4	3223.41	3349.86
420	20595.3	22824	30363.1	40569.4	67613.3	150530	253052	322046	335055										420	205.953	228.24	303.631	405.694	676.133	1505.3	2530.52	3220.46	3350.55
421	20619.8	22712.4	30391.1	40650.1	67743.4	150213	253140	322166	335193										421	206.198	227.124	303.911	406.501	677.434	1502.13	2531.4	3221.66	3351.93
422	20568	22766.7	30482.9	40560.6	67831.5	150172	253345	322291	335160										422	205.68	227.667	304.829	405.606	678.315	1501.72	2533.45	3222.91	3351.6
423	20595.7	22787.9	30362.8	40591.2	67853.7	150356	253477	322070	335012										423	205.957	227.879	303.628	405.912	678.537	1503.56	2534.77	3220.7	3350.12
424	20588.9	22805	30350.8	40626.4	67954.8	150659	253145	322299	334748										424	205.889	228.05	303.508	406.264	679.548	1506.59	2531.45	3222.99	3347.48
425	20568.4	22795.8	30388.4	40663.5	67885.5	150896	253407	321834	334933										425	205.684	227.958	303.884	406.635	678.855	1508.96	2534.07	3218.34	3349.33
426	20624.3	22780.2	30358.3	40677.8	67951.2	150478	253675	322233	334948										426	206.243	227.802	303.583	406.778	679.512	1504.78	2536.75	3222.33	3349.48
427	20582.2	22715	30361.7	40682.7	67989.7	150909	253621	321974	334843										427	205.822	227.15	303.617	406.827	679.897	1509.09	2536.21	3219.74	3348.43
428	20646.9	22746.5	30413.3	40722.2	68002.8	150879	253284	321796	335063										428	206.469	227.465	304.133	407.222	680.028	1508.79	2532.84	3217.96	3350.63
429	20646.5	22820.7	30389.3	40738.2	68305	151056	253555	322065	335315										429	206.465	228.207	303.893	407.382	683.05	1510.56	2535.55	3220.65	3353.15
430	20548.7	22780.8	30377.5	40743.6	68184.7	150938	253721	321985	335037										430	205.487	227.808	303.775	407.436	681.847	1509.38	2537.21	3219.85	3350.37
431	20504.9	22784.9	30338.9	40774.6	68297.7	151208	253652	321714	335175										431	205.049	227.849	303.389	407.746	682.977	1512.08	2536.52	3217.14	3351.75
432	20605.4	22739.4	30474.4	40714.8	68408.4	151181	253829	321990	335211										432	206.054	227.394	304.744	407.148	684.084	1511.81	2538.29	3219.9	3352.11
433	20631.1	22751.3	30398	40756.1	68342.9	151226	254219	322162	334983										433	206.311	227.513	303.98	407.561	683.429	1512.26	2542.19	3221.62	3349.83
434	20692.9	22764.8	30320.6	40682.5	68468.8	151337	254083	322093	335210										434	206.929	227.648	303.206	406.825	684.688	1513.37	2540.83	3220.93	3352.1
435	20685.5	22805.4	30306	40932.8	68317.7	151273	253658	321976	335120										435	206.855	228.054	303.06	409.328	683.177	1512.73	2536.58	3219.76	3351.2
436	20630.5	22755.2	30340.4	41018.8	68432.7	151548	254160	321858	334850										436	206.305	227.552	303.404	410.188	684.327	1515.48	2541.6	3218.58	3348.5
437	20675.2	22836.1	30490.7	40959.2	68545.2	151653	254372	321602	335034										437	206.752	228.361	304.907	409.592	685.452	1516.53	2543.72	3216.02	3350.34
438	20619.1	22743.4	30440.2	40848.3	68639.6	151653	254239	321797	335069										438	206.191	227.434	304.402	408.483	686.396	1516.53	2542.39	3217.97	3350.69
439	20631.1	22775.9	30407.1	40837.8	68702.6	151540	254292	321526	335162										439	206.311	227.759	304.071	408.378	687.026	1515.4	2542.92	3215.26	3351.62
440	20525.2	22763.5	30405.9	40867.4	68431.3	151312	254261	321656	334951										440	205.252	227.635	304.059	408.674	684.313	1513.12	2542.61	3216.56	3349.51
441	20622.9	22840.8	30412.4	40865.7	68714.7	151680	254226	321736	334725										441	206.229	228.408	304.124	408.657	687.147	1516.8	2542.26	3217.36	3347.25
442	20572.1	22775.8	30462.6	40946.8	68683.9	151741	254579	321597	334880										442	205.721	227.758	304.626	409.467	686.839	1517.41	2545.79	3215.97	3348.8
443	20501.2	22809.8	30405	41036.5	68774.8	151893	254386	321585	334528										443	205.012	228.098	304.05	410.365	687.747	1518.93	2543.86	3215.85	3345.28
444	20655.5	22829.8	30431.4	41110.2	68765.1	151796	254539	321399	335082										444	206.555	228.298	304.314	411.102	687.651	1517.96	2545.39	3213.99	3350.82
445	20570.2	22797.5	30538	40909.5	68824.7	151807	254351	321720	334992										445	205.702	227.975	305.38	409.095	688.247	1518.07	2543.51	3217.2	3349.92
446	20681.3	22784	30352.8	40995.5	68914	152010	254470	321432	335091										446	206.813	227.84	303.527	409.955	689.14	1520.1	2544.7	3214.32	3350.91
447	20633.3	22694.2	30368.9	41071.2	68838	152003	254782	321558	334960										447	206.333	226.942	303.689	410.712	688.38	1520.03	2547.82	3215.58	3349.59
448	20607.1	22905	30395.8	41005.4	68942.4	152286	254864	321457	335157										448	206.071	229.05	303.958	410.054	689.424	1522.86	2548.64	3214.57	3351.57
449	20623.2	22811.1	30476.1	41022.9	68901.8	152023	254671	321422	334985										449	206.232	228.111	304.761	410.229	689.018	1520.23	2546.71	3214.22	3349.85
450	20546.7	22759.6	30408.5	40967.1	68934.1	151928	254989	321266	334926										450	205.467	227.596	304.085	409.671	689.341	1519.28	2549.89	3212.66	3349.26
451	20599.4	22799.2	30441.5	41087.2	69188.4	152320	254929	321402	334648										451	205.994	227.992	304.415	410.872	691.884	1523.2	2549.29	3214.02	3346.48
452	20544.7	22687.9	30464.8	41169.6	69358.2	152224	255122	321438	335033										452	205.447	226.879	304.648	411.696	693.582	1522.24	2551.22	3214.39	3350.33
453	20461.6	22717	30391.2	41153.7	69092.6	152458	254788	321354	334925										453	204.616	227.17	303.913	411.537	690.926	1524.58	2547.88	3213.54	3349.25
454	20610.8	22821.2	30375.8	41208.5	69238.8	152372	255368	321586	335133										454	206.108	228.212	303.758	412.085	692.388	1523.72	2553.68	3215.86	3351.33
455	20600.7	22871.5	30362.3	41166.7	69293.5	152478	254928	321457	334826										455	206.007	228.715	303.623	411.667	692.935	1524.78	2549.28	3214.57	3348.26
456	20620.6	22742.7	30440.1	41092.6	69331.5	152422	255304	321020	334688										456	206.206	227.427	304.401	410.926	693.315	1524.22	2553.04	3210.2	3346.88
457	20582.2	22727.2	30382.2	41224.1	69416.4	152573	255355	321321	334752										457	205.822	227.272	303.822	412.241	694.164	1525.73	2553.55	3213.21	3347.52
458	20516	22772.3	30425.3	41123.1	69161.6	152503	255103	320952	334816										458	205.16	227.723	304.253	411.231	691.616	1525.03	2551.03	3209.52	3348.16
459	20547.6	22847.1	30565.1	41217.3	69234.6	152546	255105	321250	335000										459	205.476	228.471	305.651	412.173	692.346	1525.46	2551.05	3212.5	3350
460	20587	22739.7	30434.4	41293.1	69546	152826	255325	321176	334918										460	205.87	227.397	304.344	412.931	695.46	1528.26	2553.25	3211.76	3349.18
461	20603.5	22833.4	30436.1	41189.7	69593.9	152753	255251	321023	334703										461	206.035	228.334	304.361	411.897	695.939	1527.53	2552.51	3210.23	3347.03
462	20515.3	22829.2	30547.6	41294.7	69736.1	152826	255253	320701	334995										462	205.153	228.292	305.476	412.947	697.361	1528.26	2552.53	3207.01	3349.95
463	20623.7	22870.1	30481	41230.6	69449.4	152838	255611	320970	334841										463	206.237	228.701	304.81	412.306	694.494	1528.38	2556.11	3209.7	3348.41
464	20542.4	22728.6	30580.2	41245.1	69622.9	153215	255578	321327	334978										464	205.424	227.286	305.802	412.451	696.229	1532.15	2555.78	3213.27	3349.78
465	20582.1	22740	30498	41188.7	69907.9	153042	255589	320890	334542										465	205.821	227.4	304.98	411.887	699.079	1530.42	2555.89	3208.9	3345.42
466	20571.3	22941.7	30395.1	41335	69861.9	152982	255788	320819	334705										466	205.713	229.417	303.951	413.35	698.619	1529.82	2557.88	3208.19	3347.05
467	20518.2	22828.9	30513	41376.1	69690.8	153027	255792	320931	334883										467	205.182	228.289	305.13	413.761	696.908	1530.27	2557.92	3209.31	3348.83
468	20619.4	22700.2	30476.1	41364.2	69671	153252	255760	320924	334938										468	206.194	227.002	304.761	413.642	696.71	1532.52	2557.6	3209.24	3349.38
469	20585.4	22775	30542.5	41437	69677.8	153293	255640	320541	334604										469	205.854	227.75	305.425	414.37	696.778	1532.93	2556.4	3205.41	3346.04
470	20605.9	22795.8	30492.9	41454.3	69724.4	153227	255976	320964	334699										470	206.059	227.958	304.929	414.543	697.244	1532.27	2559.76	3209.64	3346.99
471	20648.1	22695.6	30469.5	41530.2	69892.1	153273	255840	320736	334483										471	206.481	226.956	304.695	415.302	698.921	1532.73	2558.4	3207.36	3344.83
472	20564.3	22844.8	30557.2	41371.9	70070.6	153361	255968	320619	334865										472	205.643	228.448	305.572	413.719	700.706	1533.61	2559.68	3206.19	3348.65
473	20597.3	22787.2	30566.3	41424	69899.3	153398	256065	320521	334283										473	205.973	227.872	305.663	414.24	698.993	1533.98	2560.65	3205.21	3342.83
474	20506.3	22741.4	30512.2	41420.3	70067.6	153112	255932	320561	334756										474	205.063	227.414	305.122	414.203	700.676	1531.12	2559.32	3205.61	3347.56
475	20607	22764.9	30580	41413.8	70046.2	153529	256232	321022	334743										475	206.07	227.649	305.8	414.138	700.462	1535.29	2562.32	3210.22	3347.43
476	20547.5	22912.1	30508.8	41403.2	70026.9	153388	256349	320676	334559										476	205.475	229.121	305.088	414.032	700.269	1533.88	2563.49	3206.76	3345.59
477	20664.5	22922.5	30450	41403.6	70211	153715	256176	320347	334445										477	206.645	229.225	304.5	414.036	702.11	1537.15	2561.76	3203.47	3344.45
478	20544.4	22783.5	30547.7	41469	70159	153619	256077	320678	334604										478	205.444	227.835	305.477	414.69	701.59	1536.19	2560.77	3206.78	3346.04
479	20602.7	22774.7	30600.7	41406.1	70124.1	153844	256231	320697	334647										479	206.027	227.747	306.007	414.061	701.241	1538.44	2562.31	3206.97	3346.47
480	20619.1	22798.8	30508.6	41550.1	70281.9	153778	256312	320748	334611										480	206.191	227.988	305.086	415.501	702.819	1537.78	2563.12	3207.48	3346.11
481	20558.7	22812.7	30518.8	41503	70283.8	153812	256081	320762	334689										481	205.587	228.127	305.188	415.03	702.838	1538.12	2560.81	3207.61	3346.89
482	20570.3	22766.5	30585	41515.4	70353.2	153668	256065	320538	334552										482	205.703	227.665	305.85	415.154	703.533	1536.68	2560.65	3205.38	3345.52
483	20612.6	22848.8	30510	41480	70273.1	153812	256584	320585	334847										483	206.126	228.488	305.1	414.8	702.731	1538.12	2565.84	3205.85	3348.47
484	20583.6	22830.7	30548.4	41512.8	70312.6	153636	256436	319866	334387										484	205.836	228.307	305.484	415.128	703.126	1536.36	2564.36	3198.66	3343.87
485	20573.2	22722	30557.5	41513.3	70521.7	153985	256587	320262	334653										485	205.732	227.22	305.575	415.133	705.217	1539.85	2565.87	3202.62	3346.53
486	20614.9	22736.5	30565.9	41471.3	70431.3	153887	256297	320166	334697										486	206.149	227.365	305.659	414.713	704.313	1538.87	2562.97	3201.66	3346.97
487	20568.9	22708.7	30454.2	41598.8	70410.9	154091	256779	320053	334646										487	205.689	227.087	304.542	415.988	704.109	1540.91	2567.79	3200.53	3346.46
488	20560.8	22843.8	30527.3	41484.2	70505.8	154073	256673	319996	334790										488	205.608	228.438	305.273	414.842	705.058	1540.73	2566.73	3199.96	3347.9
489	20513.3	22806.2	30594.6	41518.9	70585.6	154184	256544	320195	334434										489	205.133	228.062	305.946	415.189	705.856	1541.84	2565.44	3201.95	3344.34
490	20637.8	22755.8	30571	41629.2	70469.8	154062	256891	320058	334471										490	206.378	227.558	305.71	416.292	704.698	1540.62	2568.91	3200.58	3344.71
491	20518.5	22736.3	30577.7	41726.8	70666.6	154218	256552	320227	334614										491	205.185	227.363	305.777	417.268	706.666	1542.18	2565.52	3202.27	3346.14
492	20603.4	22843.9	30574.5	41665.3	70726.5	154079	256965	320222	334448										492	206.034	228.439	305.745	416.653	707.265	1540.79	2569.65	3202.22	3344.48
493	20593.2	22713.3	30553.2	41671.6	70726.1	154298	256618	320005	334237										493	205.932	227.133	305.532	416.716	707.261	1542.98	2566.18	3200.05	3342.37
494	20507.3	22635.5	30597.1	41510.5	70778.5	154497	256879	320179	334292										494	205.073	226.355	305.971	415.105	707.785	1544.97	2568.79	3201.79	3342.92
495	20574.1	22890.6	30535.8	41617.7	70955.1	154558	256659	320246	334546										495	205.741	228.906	305.358	416.177	709.551	1545.58	2566.59	3202.46	3345.46
496	20631.2	22819.1	30619.2	41628.6	70903.3	154426	257034	319754	334438										496	206.312	228.191	306.192	416.286	709.033	1544.26	2570.34	3197.54	3344.38
497	20580.2	22888.1	30594	41770.3	70877	154422	256436	320004	334179										497	205.802	228.881	305.94	417.703	708.77	1544.22	2564.36	3200.04	3341.79
498	20480.9	22818.2	30603.8	41684.7	70832.4	154678	256928	319929	334011										498	204.809	228.182	306.038	416.847	708.324	1546.78	2569.28	3199.29	3340.11
499	20623.9	22789.3	30549.8	41687	70716.8	154570	256977	319768	334514										499	206.239	227.893	305.498	416.87	707.168	1545.7	2569.77	3197.68	3345.14
500	20600.6	22798.1	30607.5	41818.9	70954	154515	257017	319954	334612										500	206.006	227.981	306.075	418.189	709.54	1545.15	2570.17	3199.54	3346.12
501	20509.4	22786.4	30673	41753.5	71069.6	154484	257211	319755	334247										501	205.094	227.864	306.73	417.535	710.696	1544.84	2572.11	3197.55	3342.47
502	20596.2	22822.5	30594.4	41758.2	71031.6	154628	257071	320008	334270										502	205.962	228.225	305.944	417.582	710.316	1546.28	2570.71	3200.08	3342.7
503	20556.7	22840.7	30542.2	41806.7	71004.6	154516	257276	319869	334444										503	205.567	228.407	305.422	418.067	710.046	1545.16	2572.76	3198.69	3344.44
504	20539.8	22820.4	30530.8	41959.4	71131.9	154654	257189	319792	333858										504	205.398	228.204	305.308	419.594	711.319	1546.54	2571.89	3197.92	3338.58
505	20596.1	22819.3	30596.7	41830.7	71171.3	154755	257125	319867	334131										505	205.961	228.193	305.967	418.307	711.713	1547.55	2571.25	3198.67	3341.31
506	20598.4	22765.8	30478.9	41967.4	71231.9	154779	257294	319418	334277										506	205.984	227.658	304.789	419.674	712.319	1547.79	2572.94	3194.18	3342.77
507	20531.3	22868.2	30687.6	41930.5	71151.8	154518	257355	319563	334055										507	205.313	228.682	306.876	419.305	711.518	1545.18	2573.55	3195.63	3340.55
508	20565.7	22743.1	30739.5	41955.1	71288.6	154940	257566	319339	334078										508	205.657	227.431	307.395	419.551	712.886	1549.4	2575.66	3193.39	3340.78
509	20575.5	22847.1	30542.5	41955.9	71334.7	155048	257490	319661	334179										509	205.755	228.471	305.425	419.559	713.347	1550.48	2574.9	3196.61	3341.79
510	20575.8	22806	30748.4	41933.3	71339.4	155047	257169	319181	334239										510	205.758	228.06	307.484	419.333	713.394	1550.47	2571.69	3191.81	3342.39
511	20595.8	22778.8	30618.9	41960.3	71378.8	155119	257196	319508	333936										511	205.958	227.787	306.189	419.603	713.788	1551.19	2571.96	3195.08	3339.36
512	20600.9	22828.8	30583.1	41918.5	71289.2	155076	257591	319607	334280										512	206.009	228.288	305.831	419.185	712.892	1550.76	2575.91	3196.07	3342.8
513	20561	22732.6	30668.4	41856.6	71535.1	154984	257373	319315	334032										513	205.61	227.326	306.684	418.566	715.351	1549.84	2573.73	3193.15	3340.32
514	20647	22811.9	30775.6	42044.2	71494.9	154939	257225	319170	333946										514	206.47	228.119	307.756	420.442	714.949	1549.39	2572.25	3191.7	3339.46
515	20519.1	22833	30613.8	42067.2	71399.3	155314	257381	319396	334098										515	205.191	228.33	306.138	420.672	713.993	1553.14	2573.81	3193.96	3340.98
516	20577.3	22799.7	30712.3	41987.1	71399.2	155335	257460	319211	334257										516	205.773	227.997	307.123	419.871	713.992	1553.35	2574.6	3192.11	3342.57
517	20550.6	22767.8	30652.4	42026.4	71530.1	155290	257617	319411	334094										517	205.506	227.678	306.524	420.264	715.301	1552.9	2576.17	3194.11	3340.94
518	20538.7	22851.7	30621.8	42188.3	71598.2	155478	257512	319336	334108										518	205.387	228.517	306.218	421.883	715.982	1554.78	2575.12	3193.36	3341.08
519	20548.5	22794.3	30646.3	42194.4	71601.5	155329	257535	319215	333808										519	205.485	227.943	306.463	421.944	716.015	1553.29	2575.35	3192.15	3338.08
520	20597.1	22758.7	30649.6	42185.1	71734.8	155200	257705	319039	334078										520	205.971	227.587	306.496	421.851	717.348	1552	2577.05	3190.39	3340.78
521	20496.2	22797.5	30582.1	42127.6	71852.3	155414	257598	319286	334104										521	204.962	227.975	305.821	421.276	718.523	1554.14	2575.98	3192.86	3341.04
522	20633.7	22712.6	30704.3	42224.8	71597.6	155375	257881	319136	334264										522	206.337	227.126	307.043	422.248	715.976	1553.75	2578.81	3191.36	3342.64
523	20616.7	22733.5	30599.3	42055.6	71677.7	155594	257653	319021	334129										523	206.167	227.335	305.993	420.556	716.777	1555.94	2576.53	3190.21	3341.29
524	20604.6	22782.7	30643.2	42213.7	71795.2	155477	257645	318974	334014										524	206.046	227.827	306.432	422.137	717.952	1554.77	2576.45	3189.74	3340.14
525	20553.3	22714.3	30692.7	42213.3	71898.1	155441	257791	319084	333851										525	205.533	227.143	306.927	422.133	718.981	1554.41	2577.91	3190.84	3338.51
526	20507.5	22720.9	30723.1	42070.2	71903.2	155440	257865	318736	333777										526	205.075	227.209	307.231	420.702	719.032	1554.4	2578.65	3187.36	3337.77
527	20507.3	22804.4	30676.8	42215.2	71903.8	155387	258040	318568	333955										527	205.073	228.044	306.768	422.152	719.038	1553.87	2580.4	3185.68	3339.55
528	20575.7	22795.6	30548.8	42126	72017.3	155702	257983	318897	334139										528	205.757	227.956	305.488	421.26	720.173	1557.02	2579.83	3188.97	3341.39
529	20533.6	22748.6	30575.3	41985.1	72001.8	155624	257965	319138	334103										529	205.336	227.486	305.753	419.851	720.018	1556.24	2579.65	3191.38	3341.03
530	20481.1	22763.1	30680.1	42254.6	72048.9	155660	257736	318927	333908										530	204.811	227.631	306.801	422.546	720.489	1556.6	2577.36	3189.27	3339.08
531	20545.2	22732	30719.9	42248.7	72006.2	155607	258054	318899	333851										531	205.452	227.32	307.199	422.487	720.062	1556.07	2580.55	3188.99	3338.51
532	20572.6	22708.5	30649.7	42208.9	71992	155743	257853	318878	334052										532	205.726	227.085	306.497	422.089	719.92	1557.43	2578.53	3188.78	3340.52
533	20611.4	22820	30725.3	42291.8	72221	156086	258047	318949	333775										533	206.114	228.2	307.253	422.918	722.21	1560.86	2580.47	3189.49	3337.75
534	20535.4	22788.6	30651.5	42306.9	72268.5	155819	257646	318415	334121										534	205.354	227.886	306.515	423.069	722.685	1558.19	2576.46	3184.15	3341.21
535	20571.3	22741.6	30782.5	42272	72069.4	156030	257990	318529	333711										535	205.713	227.416	307.825	422.72	720.694	1560.3	2579.9	3185.29	3337.11
536	20548.5	22775	30762.6	42281.2	72360.6	155940	257978	318603	333983										536	205.485	227.75	307.626	422.812	723.606	1559.4	2579.78	3186.03	3339.83
537	20585.6	22790.7	30699.9	42331.1	72248.4	155905	258074	318952	333716										537	205.856	227.907	306.999	423.311	722.484	1559.05	2580.74	3189.52	3337.16
538	20546.3	22816.7	30748.8	42216.2	72198.7	155827	258158	318660	333902										538	205.463	228.167	307.488	422.162	721.987	1558.27	2581.58	3186.6	3339.02
539	20564	22726.1	30701.7	42376.4	72422.6	156061	258144	318722	333560										539	205.64	227.261	307.017	423.764	724.226	1560.61	2581.44	3187.22	3335.6
540	20643.3	22814.4	30762.8	42197.7	72242.9	156315	258247	318407	333905										540	206.433	228.144	307.628	421.977	722.429	1563.15	2582.47	3184.07	3339.05
541	20555.6	22667.8	30643.4	42363.7	72260.3	156040	258444	318197	334082										541	205.556	226.678	306.434	423.637	722.603	1560.4	2584.44	3181.97	3340.82
542	20578.8	22806.5	30705.7	42336.8	72411.8	156053	257941	318158	334121										542	205.788	228.065	307.057	423.368	724.118	1560.53	2579.41	3181.58	3341.21
543	20575.9	22816.5	30612.5	42439.1	72313.8	156226	258201	318596	333715										543	205.759	228.165	306.125	424.391	723.138	1562.26	2582.01	3185.96	3337.15
544	20596.1	22812.1	30770.4	42425.7	72390.3	155972	258134	318300	333900										544	205.961	228.121	307.704	424.257	723.903	1559.72	2581.34	3183	3339
545	20542	22874.1	30728.1	42476.8	72399.6	156265	258158	318429	333491										545	205.42	228.741	307.281	424.768	723.996	1562.65	2581.58	3184.29	3334.91
546	20650	22708.2	30737.2	42285.5	72579	156454	258348	318376	333874										546	206.5	227.082	307.372	422.855	725.79	1564.54	2583.48	3183.76	3338.74
547	20571.2	22734.9	30658.7	42411.6	72589.9	156184	258371	318157	333512										547	205.712	227.349	306.587	424.116	725.899	1561.84	2583.71	3181.57	3335.12
548	20668.8	22812.4	30754.7	42466.5	72733.2	156361	258375	317951	334103										548	206.688	228.124	307.547	424.665	727.332	1563.61	2583.75	3179.51	3341.03
549	20555.5	22841.1	30755.3	42638.5	72742.5	156317	258062	318354	333424										549	205.555	228.411	307.553	426.385	727.425	1563.17	2580.62	3183.54	3334.24
550	20585.6	22767.4	30755.7	42457.1	72771.5	156447	258397	318212	333770										550	205.856	227.674	307.557	424.571	727.715	1564.47	2583.97	3182.12	3337.7
551	20578.8	22733.2	30644.2	42508.6	72615.3	156425	258462	318326	333614										551	205.788	227.332	306.442	425.086	726.153	1564.25	2584.62	3183.26	3336.14
552	20535.7	22848.1	30716.8	42533.2	72784.4	156636	258538	317670	333864										552	205.357	228.481	307.168	425.332	727.844	1566.36	2585.38	3176.7	3338.64
553	20583.2	22689.3	30683	42488	72688.9	156736	258370	318356	333631										553	205.832	226.893	306.83	424.88	726.889	1567.36	2583.7	3183.56	3336.31
554	20577.5	22821.4	30779.5	42597	72660.2	156469	258727	317767	333717										554	205.775	228.214	307.795	425.97	726.602	1564.69	2587.27	3177.67	3337.17
555	20555.2	22738.7	30731.9	42490.4	72808.8	156810	258458	317847	333973										555	205.552	227.387	307.319	424.904	728.088	1568.1	2584.58	3178.47	3339.73
556	20579.9	22840.8	30868.9	42563.7	72913.1	156572	258478	318032	333583										556	205.799	228.408	308.689	425.637	729.131	1565.72	2584.78	3180.32	3335.83
557	20576.2	22815	30675.2	42488.5	72879.6	156652	258592	317054	333831										557	205.762	228.15	306.752	424.885	728.796	1566.52	2585.92	3170.54	3338.31
558	20539.3	22864.4	30773.6	42635.2	72840.3	156669	258346	317696	333556										558	205.393	228.644	307.736	426.352	728.403	1566.69	2583.46	3176.96	3335.56
559	20583.4	22717.3	30792.2	42698.7	72907.4	156569	258609	317656	333638										559	205.834	227.173	307.922	426.987	729.074	1565.69	2586.09	3176.56	3336.38
560	20549.8	22720.5	30836.5	42523.7	72993.3	156673	258492	317631	333678										560	205.498	227.205	308.365	425.237	729.933	1566.73	2584.92	3176.31	3336.78
561	20597.4	22783.7	30713.7	42678.8	73083.9	156818	258821	317433	333801										561	205.974	227.837	307.137	426.788	730.839	1568.18	2588.21	3174.33	3338.01
562	20565.3	22753.6	30744.8	42663.9	73018.9	156597	258763	317515	333563										562	205.653	227.536	307.448	426.639	730.189	1565.97	2587.63	3175.15	3335.63
563	20542.8	22744.9	30773.1	42718.9	73064	156802	258467	317697	333423										563	205.428	227.449	307.731	427.189	730.64	1568.02	2584.67	3176.97	3334.23
564	20600.7	22765.7	30776.6	42579.4	73097.1	157156	258553	317346	333579										564	206.007	227.657	307.766	425.794	730.971	1571.56	2585.53	3173.46	3335.79
565	20607.1	22817.4	30675.3	42663	73036.6	156970	258699	317485	333719										565	206.071	228.174	306.753	426.63	730.366	1569.7	2586.99	3174.85	3337.19
566	20579.3	22740.7	30848.7	42607.9	73055.6	157199	258522	317734	333465										566	205.793	227.407	308.487	426.079	730.556	1571.99	2585.22	3177.34	3334.65
567	20500.1	22783.2	30782.7	42737.8	73164.2	156905	258577	317448	333560										567	205.001	227.832	307.827	427.378	731.642	1569.05	2585.77	3174.48	3335.61
568	20656	22803.8	30713.8	42671.5	73145.5	157108	258765	317285	333755										568	206.56	228.038	307.138	426.715	731.455	1571.08	2587.65	3172.85	3337.55
569	20537.4	22772	30767.5	42769.7	73249.8	156737	258528	317567	333666										569	205.374	227.72	307.675	427.697	732.498	1567.37	2585.28	3175.67	3336.66
570	20618	22798.1	30832.3	42705.4	73214.1	157044	258677	317130	333694										570	206.18	227.981	308.323	427.054	732.141	1570.44	2586.77	3171.3	3336.94
571	20607.3	22751.7	30777.1	42805.4	73306.4	157259	258693	317370	333220										571	206.073	227.517	307.771	428.054	733.064	1572.59	2586.93	3173.7	3332.2
572	20605.8	22774.6	30856	42744.2	73320.2	156950	259012	317357	333177										572	206.058	227.746	308.56	427.442	733.202	1569.5	2590.12	3173.57	3331.77
573	20514	22866.6	30726.1	42766.2	73425.4	157072	258706	317335	333541										573	205.14	228.666	307.261	427.662	734.254	1570.72	2587.06	3173.35	3335.41
574	20566	22841.6	30774.1	42710.8	73263.6	157251	258755	317089	333731										574	205.66	228.416	307.741	427.108	732.636	1572.51	2587.55	3170.89	3337.31
575	20614	22669.3	30799.9	42693.3	73312.4	156901	258711	317115	333180										575	206.14	226.693	307.999	426.933	733.124	1569.01	2587.11	3171.15	3331.8
576	20626	22860.5	30808.2	42837.3	73433.8	157299	258626	317135	333316										576	206.26	228.605	308.082	428.373	734.338	1572.99	2586.26	3171.35	3333.16
577	20602.1	22839.9	30788.7	42731.7	73311.7	157338	258743	317112	333478										577	206.021	228.399	307.887	427.317	733.117	1573.38	2587.43	3171.12	3334.78
578	20645.5	22779.8	30881.5	42781.9	73427.3	157272	258940	317383	333090										578	206.455	227.798	308.815	427.819	734.273	1572.72	2589.4	3173.83	3330.9
579	20579.6	22721.2	30903.5	42816	73514.6	157355	258856	317100	333205										579	205.796	227.212	309.035	428.16	735.146	1573.55	2588.56	3171	3332.05
580	20576.5	22718.9	30816.7	42900.7	73526.6	157305	258968	316891	333511										580	205.765	227.189	308.167	429.007	735.266	1573.05	2589.68	3168.91	3335.11
581	20589.7	22773.3	30861.4	42885	73508	157197	258938	316861	333157										581	205.897	227.733	308.614	428.85	735.08	1571.97	2589.38	3168.61	3331.57
582	20641.9	22754	30882.8	43069.5	73632.3	157521	258915	316940	333672										582	206.419	227.54	308.828	430.695	736.323	1575.21	2589.15	3169.4	3336.72
583	20570.5	22800.2	30834.5	42886	73597.1	157545	258900	316605	333476										583	205.705	228.002	308.345	428.86	735.971	1575.45	2589	3166.05	3334.76
584	20534.4	22808.8	30793.5	42927.7	73623	157454	258600	317344	333169										584	205.344	228.088	307.935	429.277	736.23	1574.54	2586	3173.44	3331.69
585	20504.7	22847.8	30853.3	42953	73527.7	157358	259049	316822	333476										585	205.047	228.478	308.533	429.53	735.277	1573.58	2590.49	3168.22	3334.76
586	20596.4	22869.9	30814.1	42926.2	73779.8	157326	258749	316611	333248										586	205.964	228.699	308.141	429.262	737.798	1573.26	2587.49	3166.11	3332.48
587	20580.6	22804.5	30775.3	42947	73662.7	157627	258966	316682	333467										587	205.806	228.045	307.753	429.47	736.627	1576.27	2589.66	3166.82	3334.67
588	20657.9	22812.4	30751.3	43027.1	73722.5	157522	258728	316538	333468										588	206.579	228.124	307.513	430.271	737.225	1575.22	2587.28	3165.38	3334.68
589	20599.6	22766.5	30842.7	43023.9	73689.8	157492	258838	316482	333174										589	205.996	227.665	308.427	430.239	736.898	1574.92	2588.38	3164.82	3331.74
590	20618.6	22700.8	30866.1	43018	73737.5	157704	259124	316552	333501										590	206.186	227.008	308.661	430.18	737.375	1577.04	2591.24	3165.52	3335.01
591	20563.2	22740.7	30918.4	43062.6	73874	157938	258971	316389	332999										591	205.632	227.407	309.184	430.626	738.74	1579.38	2589.71	3163.89	3329.99
592	20474.7	22741.8	30873.8	43063.2	73857.4	157609	259017	316494	333431										592	204.747	227.418	308.738	430.632	738.574	1576.09	2590.17	3164.94	3334.31
593	20628.4	22870	30909.9	43007.3	73866.8	157588	258830	316581	333167										593	206.284	228.7	309.099	430.073	738.668	1575.88	2588.3	3165.81	3331.67
594	20529.2	22806	30843.2	42906.5	73780.8	157692	258941	316067	333309										594	205.292	228.06	308.432	429.065	737.808	1576.92	2589.41	3160.67	3333.09
595	20600.7	22734.9	30874	43037.8	73923.7	157736	258879	316252	333463										595	206.007	227.349	308.74	430.378	739.237	1577.36	2588.79	3162.52	3334.63
596	20644.9	22798.7	30809.4	43040	74055	157457	259257	316267	332999										596	206.449	227.987	308.094	430.4	740.55	1574.57	2592.57	3162.67	3329.99
597	20572.1	22848.6	30907.4	42957	74098	157559	258978	316395	333152										597	205.721	228.486	309.074	429.57	740.98	1575.59	2589.78	3163.95	3331.52
598	20528.8	22780.7	30856	43043.2	73866.2	157840	259011	316301	333093										598	205.288	227.807	308.56	430.432	738.662	1578.4	2590.11	3163.01	3330.93
599	20621.7	22731.2	30823.6	43181	73988	157990	259075	316387	333000										599	206.217	227.312	308.236	431.81	739.88	1579.9	2590.75	3163.87	3330
600	20574.8	22801.3	30932.8	43055.5	74095.1	157657	258771	315950	333333										600	205.748	228.013	309.328	430.555	740.951	1576.57	2587.71	3159.5	3333.33
