# Supplementary material for: Daptomycin forms a stable complex with phosphatidylglycerol for selective uptake to bacterial membrane
Source: eLife. 2025 Jun 2;13:RP93267. doi: 10.7554/eLife.93267 (PMC12129450; doi:10.7554/eLife.93267)
Supplement: Figure 2—source data 2. [file elife-93267-fig2-data2.xlsx]

## Sheet: Sheet1
	Time	Control	FPP-20.83uM	CL-20.83uM	DMPG-20.83uM	POPA-20.83uM	POPS-20.83uM	POPE-20.8uM		Conditions: DMPC=166uM, Ca2+ = 1.67 mM, Dap = 15 uM, micelles with sonication, Fluorescence at 454 nM											Time	100% DMPC	11.5% FPP	11.5% CL	11.5% DMPG	11.5% POPA	11.5% POPS	11.5% POPE
	0	20189.7	19217.2	93512.2	67833.8	16015.1	47760.8	16738.6													0	201.897	192.172	935.122	678.338	160.151	477.608	167.386
	1	20211.9	19236.9	93477.3	68798.4	16048.7	47747.4	16676.6													1	202.119	192.369	934.773	687.984	160.487	477.474	166.766
	2	20105.3	19220.5	93470.8	69968.1	16019.2	47719.1	16758.5													2	201.053	192.205	934.708	699.681	160.192	477.191	167.585
	3	20114.2	19185.3	93530.9	70793.7	16057.7	47470.2	16704.3													3	201.142	191.853	935.309	707.937	160.577	474.702	167.043
	4	20183.6	19055.8	93601.2	71722.7	16048.4	47443.4	16759.9													4	201.836	190.558	936.012	717.227	160.484	474.434	167.599
	5	20202.8	19089.5	93500.5	72785.8	16010.8	47460.2	16721.9													5	202.028	190.895	935.005	727.858	160.108	474.602	167.219
	6	20241.2	19039.8	93585	73628.8	16047	47460.6	16733.8													6	202.412	190.398	935.85	736.288	160.47	474.606	167.338
	7	20209.9	19014.9	93616.8	74612.8	16039.7	47440	16715.3													7	202.099	190.149	936.168	746.128	160.397	474.4	167.153
	8	20364.4	19064.6	93488.7	75622.9	15980.7	47261.3	16743.6													8	203.644	190.646	934.887	756.229	159.807	472.613	167.436
	9	20208.3	18972.5	93554.8	76606.4	16043.6	47185.9	16807.5													9	202.083	189.725	935.548	766.064	160.436	471.859	168.075
	10	20171.5	19041.1	93598.2	77374.3	15948.6	47214.2	16826.7													10	201.715	190.411	935.982	773.743	159.486	472.142	168.267
	11	20160.3	19062.4	93560.4	78398.1	16050.5	47259.7	16856.5													11	201.603	190.624	935.604	783.981	160.505	472.597	168.565
	12	20203.6	18995.5	93464.7	79571.5	16073.3	47250.1	16793.4													12	202.036	189.955	934.647	795.715	160.733	472.501	167.934
	13	20253.2	18987.8	93734.5	80348	16010	47110.7	16778.9													13	202.532	189.878	937.345	803.48	160.1	471.107	167.789
	14	20292.7	18954.2	93657.4	81186.6	15959.4	47135.1	16749.7													14	202.927	189.542	936.574	811.866	159.594	471.351	167.497
	15	20164	19079.8	93518	81994.2	16013	47296.8	16769.2													15	201.64	190.798	935.18	819.942	160.13	472.968	167.692
	16	20302.3	19026.3	93564.6	83377.3	16057.4	46994.7	16747.1													16	203.023	190.263	935.646	833.773	160.574	469.947	167.471
	17	20301.6	19039	93700.8	84262.7	16068.8	47129.2	16757.6													17	203.016	190.39	937.008	842.627	160.688	471.292	167.576
	18	20309.4	18955.7	93535.7	85385.5	16054.5	46934.7	16774													18	203.094	189.557	935.357	853.855	160.545	469.347	167.74
	19	20225.8	19052.8	93821.3	86268.9	16051.2	46936.3	16723.2													19	202.258	190.528	938.213	862.689	160.512	469.363	167.232
	20	20255.4	19004.8	93787.5	87132.8	16022.8	47028.8	16728.5													20	202.554	190.048	937.875	871.328	160.228	470.288	167.285
	21	20240.4	18965.7	93779.3	88164.7	15968	47019.1	16804.5													21	202.404	189.657	937.793	881.647	159.68	470.191	168.045
	22	20353	18966.5	93746.1	89348.9	16112.7	46856.1	16816.2													22	203.53	189.665	937.461	893.489	161.127	468.561	168.162
	23	20330	18996.6	93798.7	90470.1	16049.8	46921.4	16770.7													23	203.3	189.966	937.987	904.701	160.498	469.214	167.707
	24	20300.8	18876.4	93712.3	91392.6	16003.4	46985.2	16748.1													24	203.008	188.764	937.123	913.926	160.034	469.852	167.481
	25	20267.2	19056.1	93827.4	92671.4	16058.8	46817.7	16751.9													25	202.672	190.561	938.274	926.714	160.588	468.177	167.519
	26	20280.8	19022.7	93998.9	93544.4	16051.8	46824.2	16778.4													26	202.808	190.227	939.989	935.444	160.518	468.242	167.784
	27	20245.8	19005.9	93939.6	94365.2	15970.4	46814.5	16908.6													27	202.458	190.059	939.396	943.652	159.704	468.145	169.086
	28	20320.3	19017.6	93785.9	95634.9	16108.9	46860.4	16819													28	203.203	190.176	937.859	956.349	161.089	468.604	168.19
	29	20336.3	19053.6	93829.4	96730.2	16060.8	46821.9	16737.8													29	203.363	190.536	938.294	967.302	160.608	468.219	167.378
	30	20303.1	18866	93818.2	97814	16081.7	46868	16773.9													30	203.031	188.66	938.182	978.14	160.817	468.68	167.739
	31	20370.7	18964.8	93939.5	98950	16000.2	46772.9	16782													31	203.707	189.648	939.395	989.5	160.002	467.729	167.82
	32	20413.1	18885.6	93920.2	99979.6	15964.8	46827.7	16787.3													32	204.131	188.856	939.202	999.796	159.648	468.277	167.873
	33	20228.6	18977.1	94080.3	101106	15982.4	46599	16826.8													33	202.286	189.771	940.803	1011.06	159.824	465.99	168.268
	34	20407.1	18895.7	94103.3	101862	16065.9	46614.8	16776.5													34	204.071	188.957	941.033	1018.62	160.659	466.148	167.765
	35	20440.6	18991.5	93976	103032	16044.8	46661.8	16763.9													35	204.406	189.915	939.76	1030.32	160.448	466.618	167.639
	36	20336.6	18875.4	94110.8	104382	15992.1	46686.3	16807.9													36	203.366	188.754	941.108	1043.82	159.921	466.863	168.079
	37	20254.3	18882.3	93866.5	105467	16066.8	46492.6	16867.1													37	202.543	188.823	938.665	1054.67	160.668	464.926	168.671
	38	20302.6	18922.9	94109.7	106509	15985.7	46551.2	16793.1													38	203.026	189.229	941.097	1065.09	159.857	465.512	167.931
	39	20373.4	18900	93833.3	107703	16140.8	46650	16821.3													39	203.734	189	938.333	1077.03	161.408	466.5	168.213
	40	20379.5	18947.6	94089.8	108746	16022	46561.1	16791.7													40	203.795	189.476	940.898	1087.46	160.22	465.611	167.917
	41	20403.7	18833	94009.6	109895	16045.7	46694.2	16805.2													41	204.037	188.33	940.096	1098.95	160.457	466.942	168.052
	42	20288.1	18880.4	94316	110825	16069.4	46426.5	16778.4													42	202.881	188.804	943.16	1108.25	160.694	464.265	167.784
	43	20227.9	18930.2	94439.9	112130	16077.7	46537.8	16901.4													43	202.279	189.302	944.399	1121.3	160.777	465.378	169.014
	44	20323.7	18793.2	94269.4	113107	16043.2	46528.2	16741.5													44	203.237	187.932	942.694	1131.07	160.432	465.282	167.415
	45	20412.7	18883.2	94225.3	114321	16010.3	46306	16747.4													45	204.127	188.832	942.253	1143.21	160.103	463.06	167.474
	46	20360.3	18836.4	94099.1	115282	16076.5	46451.3	16809.8													46	203.603	188.364	940.991	1152.82	160.765	464.513	168.098
	47	20344	18832.8	94339.8	116572	16121.3	46520.8	16864.1													47	203.44	188.328	943.398	1165.72	161.213	465.208	168.641
	48	20279.2	18890.8	94277.8	117512	16065.1	46420.2	16748.5													48	202.792	188.908	942.778	1175.12	160.651	464.202	167.485
	49	20377	18911	94324.4	118923	16143.9	46297.3	16809.4													49	203.77	189.11	943.244	1189.23	161.439	462.973	168.094
	50	20357.1	18907.2	94445.1	119827	15996.4	46186.5	16717.1													50	203.571	189.072	944.451	1198.27	159.964	461.865	167.171
	51	20391.8	18905.3	94296.6	120933	16018	46288	16737.9													51	203.918	189.053	942.966	1209.33	160.18	462.88	167.379
	52	20407.8	18846	94254.1	121721	16067.6	46220.5	16797.1													52	204.078	188.46	942.541	1217.21	160.676	462.205	167.971
	53	20319.3	18913.3	94420.5	123017	16129.2	46246.7	16853.7													53	203.193	189.133	944.205	1230.17	161.292	462.467	168.537
	54	20273	18867.3	94395.7	124306	16063.7	46268.8	16822													54	202.73	188.673	943.957	1243.06	160.637	462.688	168.22
	55	20393.4	18898	94495.1	125277	16076.6	46269.7	16835.2													55	203.934	188.98	944.951	1252.77	160.766	462.697	168.352
	56	20395	18798.9	94391.5	126257	15991.7	46243.5	16814.2													56	203.95	187.989	943.915	1262.57	159.917	462.435	168.142
	57	20420.3	18832.7	94393.4	127462	16090.3	46175.5	16744.8													57	204.203	188.327	943.934	1274.62	160.903	461.755	167.448
	58	20325	18886.3	94622.8	128447	16025.9	46203.5	16866.8													58	203.25	188.863	946.228	1284.47	160.259	462.035	168.668
	59	20275.1	18743.2	94386.4	129665	15997.5	46263.3	16826.4													59	202.751	187.432	943.864	1296.65	159.975	462.633	168.264
	60	20379.1	18756.8	94516.1	130685	16010.7	46234.7	16778.1													60	203.791	187.568	945.161	1306.85	160.107	462.347	167.781
	61	20377.4	18918.1	94612	131745	16058.3	46119.7	16851.6													61	203.774	189.181	946.12	1317.45	160.583	461.197	168.516
	62	20391.4	18762.4	94416	132807	16029.9	46165.7	16846.4													62	203.914	187.624	944.16	1328.07	160.299	461.657	168.464
	63	20310.3	18894.8	94543.2	133612	16053.7	46090.7	16828.7													63	203.103	188.948	945.432	1336.12	160.537	460.907	168.287
	64	20378.5	18783.2	94575.7	134726	15989.8	46150.3	16841.5													64	203.785	187.832	945.757	1347.26	159.898	461.503	168.415
	65	20328.6	18860.1	94586.8	135686	15955.5	46142.1	16826.1													65	203.286	188.601	945.868	1356.86	159.555	461.421	168.261
	66	20441.9	18822.9	94651.9	136933	16044.4	46002.3	16922.4													66	204.419	188.229	946.519	1369.33	160.444	460.023	169.224
	67	20387.6	18798.6	94527.9	137911	16119.8	46028.4	16861													67	203.876	187.986	945.279	1379.11	161.198	460.284	168.61
	68	20379	18770.3	94675	138622	16118.6	46037.7	16879.1													68	203.79	187.703	946.75	1386.22	161.186	460.377	168.791
	69	20393.8	18777.1	94684.6	139545	16090.2	45935.9	16805.1													69	203.938	187.771	946.846	1395.45	160.902	459.359	168.051
	70	20363.8	18847.8	94608.9	140560	15992.6	45835.9	16849.2													70	203.638	188.478	946.089	1405.6	159.926	458.359	168.492
	71	20401.7	18766.9	94475.5	141616	16060.8	45858.6	16899.1													71	204.017	187.669	944.755	1416.16	160.608	458.586	168.991
	72	20383.2	18869	94742.6	142701	16163.6	45876.8	16842.4													72	203.832	188.69	947.426	1427.01	161.636	458.767	168.424
	73	20319.5	18729.3	94690.9	143478	16100	45966.2	16851.5													73	203.195	187.293	946.909	1434.78	161	459.662	168.515
	74	20361.6	18794.8	94817.8	144283	16118.1	45878.9	16912.4													74	203.616	187.948	948.178	1442.83	161.181	458.789	169.124
	75	20379	18875.5	94712.4	145447	16073.8	45869.6	16829.4													75	203.79	188.755	947.124	1454.47	160.738	458.696	168.294
	76	20414.4	18711.5	94678.7	146310	16027.1	45896.5	16887.3													76	204.144	187.115	946.787	1463.1	160.271	458.965	168.873
	77	20345.9	18715.4	94759	147148	16076.9	45835.2	16913.2													77	203.459	187.154	947.59	1471.48	160.769	458.352	169.132
	78	20404.5	18713.7	94777.2	148309	16101.9	45729.5	16870.7													78	204.045	187.137	947.772	1483.09	161.019	457.295	168.707
	79	20467.2	18729.4	94656.6	148940	16118.9	45799.2	16976.4													79	204.672	187.294	946.566	1489.4	161.189	457.992	169.764
	80	20481.2	18780.2	94759.4	149852	16041.6	45840	16942.4													80	204.812	187.802	947.594	1498.52	160.416	458.4	169.424
	81	20461	18727.9	94673	150808	16111.7	45735.2	16903.8													81	204.61	187.279	946.73	1508.08	161.117	457.352	169.038
	82	20346.5	18763.3	94605.1	151848	16054.4	45742	16941.7													82	203.465	187.633	946.051	1518.47	160.544	457.42	169.417
	83	20338.4	18745.4	94703.8	152775	16042.7	45830.2	16858													83	203.384	187.454	947.038	1527.75	160.427	458.302	168.58
	84	20312.1	18691.1	94607.4	153452	16155.1	45656.6	16900.9													84	203.121	186.911	946.074	1534.52	161.551	456.566	169.009
	85	20454.4	18696.9	94827	154488	16043.3	45649.9	16977.4													85	204.544	186.969	948.27	1544.88	160.433	456.499	169.774
	86	20479.4	18841.8	95051.6	155359	16079.5	45789.8	16929													86	204.794	188.418	950.516	1553.59	160.795	457.898	169.29
	87	20396.5	18812	94966.1	156358	16063	45814.9	16903.9													87	203.965	188.12	949.661	1563.58	160.63	458.149	169.039
	88	20401.5	18707.3	95009.6	157011	16011.6	45621.6	16943.8													88	204.015	187.073	950.096	1570.11	160.116	456.216	169.438
	89	20455.3	18692.4	95015.4	157950	16029.8	45714.7	16980.5													89	204.553	186.924	950.154	1579.5	160.298	457.147	169.805
	90	20346.6	18677.5	94912.9	158623	16079.8	45679.7	16916.5													90	203.466	186.775	949.129	1586.23	160.798	456.797	169.165
	91	20431	18695.8	94986.3	159446	16121.8	45627.1	16857.4													91	204.31	186.958	949.863	1594.46	161.218	456.271	168.574
	92	20463.4	18757.2	94992.9	160276	16117.2	45548.9	16931.3													92	204.634	187.572	949.929	1602.76	161.172	455.489	169.313
	93	20389.3	18650.6	95187.7	160873	16107	45528.7	16965.8													93	203.893	186.506	951.877	1608.73	161.07	455.287	169.658
	94	20397.4	18699.3	94994.4	161944	16046.9	45516.6	16908.5													94	203.974	186.993	949.944	1619.44	160.469	455.166	169.085
	95	20415.2	18734.7	94840	162599	16094.8	45597.9	16933.8													95	204.152	187.347	948.4	1625.99	160.947	455.979	169.338
	96	20389.2	18686.9	95047.1	163468	16066.3	45506.6	16935.5													96	203.892	186.869	950.471	1634.68	160.663	455.066	169.355
	97	20392.3	18703.7	95077	164236	16061.9	45637.1	16941													97	203.923	187.037	950.77	1642.36	160.619	456.371	169.41
	98	20464.3	18683.9	94752.7	165052	16022	45447.7	17018.9													98	204.643	186.839	947.527	1650.52	160.22	454.477	170.189
	99	20399.7	18701.4	95041.5	165787	16113.1	45530.4	16974.4													99	203.997	187.014	950.415	1657.87	161.131	455.304	169.744
	100	20353	18687.6	95063.2	166578	16055.3	45635.5	16893.5													100	203.53	186.876	950.632	1665.78	160.553	456.355	168.935
	101	20411.7	18678.6	95066.9	167206	16054.8	45601	16861.4													101	204.117	186.786	950.669	1672.06	160.548	456.01	168.614
	102	20469	18699.5	95204.4	168065	16045.1	45465.4	17003													102	204.69	186.995	952.044	1680.65	160.451	454.654	170.03
	103	20314.9	18629.8	95078.8	168554	16117.6	45429.3	16966.3													103	203.149	186.298	950.788	1685.54	161.176	454.293	169.663
	104	20497.6	18614	95007.1	169258	16041.5	45460.6	17022.6													104	204.976	186.14	950.071	1692.58	160.415	454.606	170.226
	105	20466.4	18690.1	95180.5	170089	16064.9	45365.3	17012.5													105	204.664	186.901	951.805	1700.89	160.649	453.653	170.125
	106	20421	18638.8	94936	170878	16136.8	45359	16995.5													106	204.21	186.388	949.36	1708.78	161.368	453.59	169.955
	107	20387.3	18687.3	94986.7	171744	16036.8	45353.6	16968													107	203.873	186.873	949.867	1717.44	160.368	453.536	169.68
	108	20379.4	18584.4	95039.9	172278	16095.1	45423.2	16968.7													108	203.794	185.844	950.399	1722.78	160.951	454.232	169.687
	109	20474	18666.7	95009.7	173012	16111.7	45505	17011.4													109	204.74	186.667	950.097	1730.12	161.117	455.05	170.114
	110	20416.8	18690.8	95071.9	173676	16125.4	45315.3	17098.1													110	204.168	186.908	950.719	1736.76	161.254	453.153	170.981
	111	20516.7	18540.7	95031	174520	16097.4	45427.2	16993.4													111	205.167	185.407	950.31	1745.2	160.974	454.272	169.934
	112	20465.9	18662.3	95103.6	175021	16018.7	45362.9	16953.1													112	204.659	186.623	951.036	1750.21	160.187	453.629	169.531
	113	20456.2	18739.3	95132.1	175663	16022.7	45348.4	17097.4													113	204.562	187.393	951.321	1756.63	160.227	453.484	170.974
	114	20357.4	18631.1	95097.4	176684	16154.9	45198.1	17069.9													114	203.574	186.311	950.974	1766.84	161.549	451.981	170.699
	115	20392.3	18682.3	95364.1	177201	16048.7	45264.6	17062													115	203.923	186.823	953.641	1772.01	160.487	452.646	170.62
	116	20410.1	18605.2	95233.2	177802	16077.4	45102.1	17082.9													116	204.101	186.052	952.332	1778.02	160.774	451.021	170.829
	117	20450.2	18627.5	94886.3	178192	16088	45297.1	17068.5													117	204.502	186.275	948.863	1781.92	160.88	452.971	170.685
	118	20380.6	18601.3	95173.5	178967	16142.3	45111.6	17071.8													118	203.806	186.013	951.735	1789.67	161.423	451.116	170.718
	119	20381.9	18675.8	95130.6	179699	16091.9	45266.5	17051													119	203.819	186.758	951.306	1796.99	160.919	452.665	170.51
	120	20379	18696	95309.5	180308	16095.3	45297.3	17086.1													120	203.79	186.96	953.095	1803.08	160.953	452.973	170.861
	121	20392.7	18653.6	95044.2	180877	16113.7	45226.3	17077.6													121	203.927	186.536	950.442	1808.77	161.137	452.263	170.776
	122	20389.9	18575.8	95119.4	181476	16050.4	45155.1	17147.7													122	203.899	185.758	951.194	1814.76	160.504	451.551	171.477
	123	20399.2	18526.4	95116.3	182185	16168.4	45002.8	17163.1													123	203.992	185.264	951.163	1821.85	161.684	450.028	171.631
	124	20385.5	18612.4	95136.9	182866	16129.6	45214.8	17096													124	203.855	186.124	951.369	1828.66	161.296	452.147	170.96
	125	20388.8	18572	95157.9	183517	16105.4	44934.3	17118.5													125	203.888	185.72	951.579	1835.17	161.054	449.343	171.185
	126	20348.7	18566.1	95209.5	183798	16035.7	45215.7	17140.4													126	203.487	185.661	952.095	1837.98	160.357	452.157	171.404
	127	20379	18634.3	95101.3	184586	16114.1	45081.1	17163.2													127	203.79	186.343	951.013	1845.86	161.141	450.811	171.632
	128	20413	18644.4	94888	184987	16122.8	45078.6	17090.9													128	204.13	186.444	948.88	1849.87	161.228	450.786	170.909
	129	20405.8	18591.7	95201.4	185704	16127.4	45138.4	17095.4													129	204.058	185.917	952.014	1857.04	161.274	451.384	170.954
	130	20494.1	18653.9	95086.5	186254	16114.9	44993.9	17167.8													130	204.941	186.539	950.865	1862.54	161.149	449.939	171.678
	131	20443.8	18612.1	95300.7	186940	16082	45022.2	17155.3													131	204.438	186.121	953.007	1869.4	160.82	450.222	171.553
	132	20410.8	18538.7	94950.4	187424	16047.1	44984.9	17088.4													132	204.108	185.387	949.504	1874.24	160.471	449.849	170.884
	133	20392.4	18640.2	95001.1	188027	16033.9	44994.7	17094.8													133	203.924	186.402	950.011	1880.27	160.339	449.947	170.948
	134	20458.1	18578.4	95124.1	188686	16064.7	44925.4	17079.8													134	204.581	185.784	951.241	1886.87	160.647	449.254	170.798
	135	20382.7	18619.7	95163.8	189079	16047.7	44989.6	17177.3													135	203.827	186.197	951.638	1890.79	160.477	449.896	171.773
	136	20357.1	18612.8	95200.1	189560	16118.1	45020.3	17131.9													136	203.571	186.128	952.001	1895.6	161.181	450.203	171.319
	137	20347.2	18500.1	95144.2	190152	16105.7	45013.3	17252.4													137	203.472	185.001	951.442	1901.52	161.057	450.133	172.524
	138	20305.7	18595.8	95136.9	190647	16066.6	44938.8	17186.4													138	203.057	185.958	951.369	1906.47	160.666	449.388	171.864
	139	20465.4	18627.5	95035	191250	16172.8	44997.5	17170.6													139	204.654	186.275	950.35	1912.5	161.728	449.975	171.706
	140	20420.5	18621	94918.8	191828	16070.9	44940.6	17259.5													140	204.205	186.21	949.188	1918.28	160.709	449.406	172.595
	141	20534.5	18594.8	95153.9	192393	16105.1	44928.4	17187.9													141	205.345	185.948	951.539	1923.93	161.051	449.284	171.879
	142	20403.8	18559.3	95255.5	192570	16090.8	44883.5	17231.6													142	204.038	185.593	952.555	1925.7	160.908	448.835	172.316
	143	20556.1	18628.2	94975.3	193325	16108.9	44956.1	17210.4													143	205.561	186.282	949.753	1933.25	161.089	449.561	172.104
	144	20372.5	18662.1	95082.2	193811	16153.4	44800.2	17187.4													144	203.725	186.621	950.822	1938.11	161.534	448.002	171.874
	145	20463.2	18546.3	95132.8	194512	16060.9	44912	17187.7													145	204.632	185.463	951.328	1945.12	160.609	449.12	171.877
	146	20481.9	18518.1	95049.4	194649	16077.3	44817.7	17268.8													146	204.819	185.181	950.494	1946.49	160.773	448.177	172.688
	147	20457	18698.5	94969.3	195416	16106	44817.6	17207.2													147	204.57	186.985	949.693	1954.16	161.06	448.176	172.072
	148	20436.6	18482.9	95228.7	196009	16071.3	44945	17248.9													148	204.366	184.829	952.287	1960.09	160.713	449.45	172.489
	149	20423.8	18629.6	95216.5	196258	16085	44827.9	17328.8													149	204.238	186.296	952.165	1962.58	160.85	448.279	173.288
	150	20487.8	18381.8	94880.6	196606	16150.6	44848.9	17249.3													150	204.878	183.818	948.806	1966.06	161.506	448.489	172.493
	151	20437.8	18614.2	95017.2	197623	16094.6	44803.2	17367.8													151	204.378	186.142	950.172	1976.23	160.946	448.032	173.678
	152	20500.4	18496.4	95091.9	197814	16043.1	44915.9	17371.3													152	205.004	184.964	950.919	1978.14	160.431	449.159	173.713
	153	20372.1	18593.9	95098.4	198313	16094.3	44834.8	17383.3													153	203.721	185.939	950.984	1983.13	160.943	448.348	173.833
	154	20384.7	18612.6	95055	198674	16104.9	44797.5	17323.8													154	203.847	186.126	950.55	1986.74	161.049	447.975	173.238
	155	20383.2	18521	94865.6	199325	16078.3	44897.2	17295.7													155	203.832	185.21	948.656	1993.25	160.783	448.972	172.957
	156	20505.6	18573.2	95132.1	199450	16118.4	44880	17413.6													156	205.056	185.732	951.321	1994.5	161.184	448.8	174.136
	157	20439.2	18573.9	95147.7	200145	16103.5	44792.3	17382.3													157	204.392	185.739	951.477	2001.45	161.035	447.923	173.823
	158	20429.6	18539.7	95343	200562	16165.2	44800.9	17353													158	204.296	185.397	953.43	2005.62	161.652	448.009	173.53
	159	20431.1	18545.3	95128.8	200869	16073.7	44681.4	17455.5													159	204.311	185.453	951.288	2008.69	160.737	446.814	174.555
	160	20346.8	18575.4	95190.1	201466	16137.5	44697.3	17424.8													160	203.468	185.754	951.901	2014.66	161.375	446.973	174.248
	161	20526.7	18622.4	95234.9	202016	16190.3	44660.8	17483.8													161	205.267	186.224	952.349	2020.16	161.903	446.608	174.838
	162	20534.4	18545.9	95275.4	202207	16118.8	44710.1	17489.3													162	205.344	185.459	952.754	2022.07	161.188	447.101	174.893
	163	20434.1	18549.8	95215.3	202587	16134.6	44717.8	17608.1													163	204.341	185.498	952.153	2025.87	161.346	447.178	176.081
	164	20475	18597.5	95067	203206	16032.8	44762.6	17486													164	204.75	185.975	950.67	2032.06	160.328	447.626	174.86
	165	20497.8	18541.6	95133.1	203818	16069.3	44738.4	17475.1													165	204.978	185.416	951.331	2038.18	160.693	447.384	174.751
	166	20470	18504.3	95147.8	204201	16170.8	44630.1	17489.6													166	204.7	185.043	951.478	2042.01	161.708	446.301	174.896
	167	20510.8	18566.7	95242.4	204600	16089.3	44638.3	17488.1													167	205.108	185.667	952.424	2046	160.893	446.383	174.881
	168	20416	18634.8	95139.2	205260	16098.1	44624.9	17498.8													168	204.16	186.348	951.392	2052.6	160.981	446.249	174.988
	169	20471	18548.5	95259	205279	16078.4	44548.6	17600.2													169	204.71	185.485	952.59	2052.79	160.784	445.486	176.002
	170	20402.2	18458.3	95082.3	205821	16062.5	44611	17491.3													170	204.022	184.583	950.823	2058.21	160.625	446.11	174.913
	171	20486.8	18638.9	95131.9	206092	16052.5	44626.9	17487.4													171	204.868	186.389	951.319	2060.92	160.525	446.269	174.874
	172	20443.9	18592	95028	206430	16143.5	44634.5	17616.7													172	204.439	185.92	950.28	2064.3	161.435	446.345	176.167
	173	20518.3	18532.6	95135	207106	16142.8	44605.8	17603.9													173	205.183	185.326	951.35	2071.06	161.428	446.058	176.039
	174	20538.6	18451.1	95110.4	207515	16122.6	44676.9	17703.5													174	205.386	184.511	951.104	2075.15	161.226	446.769	177.035
	175	20459.2	18487	95047.7	207774	16077.6	44516.3	17618.4													175	204.592	184.87	950.477	2077.74	160.776	445.163	176.184
	176	20531.9	18505.7	95026	208444	16079.2	44493.1	17597.8													176	205.319	185.057	950.26	2084.44	160.792	444.931	175.978
	177	20427	18570.7	95104.9	208736	16014.3	44629.2	17623.5													177	204.27	185.707	951.049	2087.36	160.143	446.292	176.235
	178	20422	18537.3	94997.6	208914	16065.3	44503.4	17685.4													178	204.22	185.373	949.976	2089.14	160.653	445.034	176.854
	179	20485.2	18515.6	94862.8	209610	16129	44593.9	17660.5													179	204.852	185.156	948.628	2096.1	161.29	445.939	176.605
	180	20551.9	18516.2	94996.1	209890	16183.7	44482.7	17732.2													180	205.519	185.162	949.961	2098.9	161.837	444.827	177.322
	181	20512.4	18626.3	94900.7	210195	16022.6	44534.7	17655.8													181	205.124	186.263	949.007	2101.95	160.226	445.347	176.558
	182	20408.4	18481.6	95014.4	210452	16092.9	44628.3	17711.6													182	204.084	184.816	950.144	2104.52	160.929	446.283	177.116
	183	20475.5	18520	94986.5	210646	16071.9	44428.9	17658.3													183	204.755	185.2	949.865	2106.46	160.719	444.289	176.583
	184	20513.8	18463.4	94944.6	211330	16071.3	44408.3	17636.1													184	205.138	184.634	949.446	2113.3	160.713	444.083	176.361
	185	20538.3	18526.8	95062.3	211632	16062.4	44452.8	17753.5													185	205.383	185.268	950.623	2116.32	160.624	444.528	177.535
	186	20521.5	18535.4	94931	212207	16068.3	44502.7	17736.8													186	205.215	185.354	949.31	2122.07	160.683	445.027	177.368
	187	20496.4	18506.4	95035.3	212351	16145.6	44383.2	17746.8													187	204.964	185.064	950.353	2123.51	161.456	443.832	177.468
	188	20575.3	18442.2	95049.7	212572	16166.5	44456.4	17772.3													188	205.753	184.422	950.497	2125.72	161.665	444.564	177.723
	189	20551.9	18447.3	94936.2	213205	16150.8	44457.3	17837.2													189	205.519	184.473	949.362	2132.05	161.508	444.573	178.372
	190	20446.4	18463.9	95014.9	213339	16166.5	44417.1	17860.2													190	204.464	184.639	950.149	2133.39	161.665	444.171	178.602
	191	20473.4	18485.7	94787.9	213770	16066.8	44471.8	17786.9													191	204.734	184.857	947.879	2137.7	160.668	444.718	177.869
	192	20469.1	18448.8	95039.2	214156	16185.7	44456.5	17790.4													192	204.691	184.488	950.392	2141.56	161.857	444.565	177.904
	193	20469.2	18532.7	95024	214565	16179.9	44317.6	17885													193	204.692	185.327	950.24	2145.65	161.799	443.176	178.85
	194	20527.3	18482.2	95118	215016	16092.1	44399	17834.1													194	205.273	184.822	951.18	2150.16	160.921	443.99	178.341
	195	20427.1	18435.3	94989.2	215364	16076.2	44462.8	17754.8													195	204.271	184.353	949.892	2153.64	160.762	444.628	177.548
	196	20410.5	18501.8	95105.9	215363	16091.5	44434.2	17897.5													196	204.105	185.018	951.059	2153.63	160.915	444.342	178.975
	197	20500.1	18496.3	94935.4	215825	16084.1	44290.3	17819.2													197	205.001	184.963	949.354	2158.25	160.841	442.903	178.192
	198	20423.1	18512.1	94946.8	216088	16105.5	44273.5	17912.2													198	204.231	185.121	949.468	2160.88	161.055	442.735	179.122
	199	20500.8	18470.1	94909.2	216428	16055.1	44387.1	17876.9													199	205.008	184.701	949.092	2164.28	160.551	443.871	178.769
	200	20409.3	18413.2	95120.4	216724	16126.1	44204.3	17901.5													200	204.093	184.132	951.204	2167.24	161.261	442.043	179.015
	201	20547.5	18451.7	94853.8	216936	16071.6	44382	18013.9													201	205.475	184.517	948.538	2169.36	160.716	443.82	180.139
	202	20450.9	18497.7	94933.6	217561	16094.8	44319	17989.6													202	204.509	184.977	949.336	2175.61	160.948	443.19	179.896
	203	20391.2	18504.6	94955.4	217589	16051.8	44343.8	17967.8													203	203.912	185.046	949.554	2175.89	160.518	443.438	179.678
	204	20490	18442.3	94977.4	217834	16085.9	44309.4	18057.5													204	204.9	184.423	949.774	2178.34	160.859	443.094	180.575
	205	20440.3	18449.9	95019.8	218529	16159	44361.4	18009.4													205	204.403	184.499	950.198	2185.29	161.59	443.614	180.094
	206	20438.7	18490.8	94802.4	218865	16082.8	44271.6	18082.7													206	204.387	184.908	948.024	2188.65	160.828	442.716	180.827
	207	20469	18422.5	94901.5	219030	16131.4	44169.1	18048.9													207	204.69	184.225	949.015	2190.3	161.314	441.691	180.489
	208	20523.7	18393.5	94927.4	219412	16105.7	44137	18071.2													208	205.237	183.935	949.274	2194.12	161.057	441.37	180.712
	209	20504.3	18424.7	94804.6	219622	16076.4	44204.9	18105													209	205.043	184.247	948.046	2196.22	160.764	442.049	181.05
	210	20498.6	18515	94758.8	219665	16122.5	44258.8	18100.6													210	204.986	185.15	947.588	2196.65	161.225	442.588	181.006
	211	20521.6	18487.6	94806.7	220359	16188.4	44265.7	18103.8													211	205.216	184.876	948.067	2203.59	161.884	442.657	181.038
	212	20440.2	18471.4	94668	220517	16128.6	44214.3	18159.3													212	204.402	184.714	946.68	2205.17	161.286	442.143	181.593
	213	20537.9	18422.8	94735.1	220952	16091.9	44180.4	18162.1													213	205.379	184.228	947.351	2209.52	160.919	441.804	181.621
	214	20594.3	18472.6	94925.2	221552	16053.6	44161.7	18181.4													214	205.943	184.726	949.252	2215.52	160.536	441.617	181.814
	215	20397.3	18545.9	94713.1	221822	16102	44366.6	18129.3													215	203.973	185.459	947.131	2218.22	161.02	443.666	181.293
	216	20496.3	18495.6	94652.9	221637	16056	44306.7	18171.9													216	204.963	184.956	946.529	2216.37	160.56	443.067	181.719
	217	20567.2	18500.3	94657.1	222079	16106.7	44264.5	18197.9													217	205.672	185.003	946.571	2220.79	161.067	442.645	181.979
	218	20547.3	18504.5	94749.4	222253	16177.5	44107.3	18179.2													218	205.473	185.045	947.494	2222.53	161.775	441.073	181.792
	219	20576.3	18480.5	94877	222892	16142.9	44183.4	18139.4													219	205.763	184.805	948.77	2228.92	161.429	441.834	181.394
	220	20494.9	18497.8	94603.5	223198	16064.3	44128.3	18169.5													220	204.949	184.978	946.035	2231.98	160.643	441.283	181.695
	221	20496.9	18463.7	94759.4	223250	16134.9	44170.3	18149.1													221	204.969	184.637	947.594	2232.5	161.349	441.703	181.491
	222	20492.2	18425.1	94588.9	223686	16086.1	44149.3	18187.3													222	204.922	184.251	945.889	2236.86	160.861	441.493	181.873
	223	20501.4	18454.9	94729.8	223958	16248.9	44134.9	18301.2													223	205.014	184.549	947.298	2239.58	162.489	441.349	183.012
	224	20512.3	18513.9	94876.6	224040	16128.3	44152.7	18235.5													224	205.123	185.139	948.766	2240.4	161.283	441.527	182.355
	225	20588.2	18458.3	94699.1	224586	16085.1	44083.7	18298.8													225	205.882	184.583	946.991	2245.86	160.851	440.837	182.988
	226	20471.1	18515.7	94614.6	224469	16171.8	44045.2	18290.6													226	204.711	185.157	946.146	2244.69	161.718	440.452	182.906
	227	20506.9	18392.5	94633.4	224681	16231.4	44210.7	18339.3													227	205.069	183.925	946.334	2246.81	162.314	442.107	183.393
	228	20400.1	18459.3	94478.1	225352	16050.6	44054.3	18297.9													228	204.001	184.593	944.781	2253.52	160.506	440.543	182.979
	229	20509.6	18422.5	94702.3	225236	16177.7	44025.2	18328													229	205.096	184.225	947.023	2252.36	161.777	440.252	183.28
	230	20518.6	18407.1	94464.4	225741	16090.9	43919.8	18414.6													230	205.186	184.071	944.644	2257.41	160.909	439.198	184.146
	231	20489.9	18395.6	94674	225948	16012.3	44033.6	18342.4													231	204.899	183.956	946.74	2259.48	160.123	440.336	183.424
	232	20471.5	18487.4	94593.2	226254	16149.4	44072	18393													232	204.715	184.874	945.932	2262.54	161.494	440.72	183.93
	233	20457.6	18433.6	94500.6	226385	16132.7	44061.6	18366.6													233	204.576	184.336	945.006	2263.85	161.327	440.616	183.666
	234	20516.3	18467.4	94661	226727	16070.2	44106.2	18447.3													234	205.163	184.674	946.61	2267.27	160.702	441.062	184.473
	235	20484.4	18393.6	94696.6	226818	16121.4	44092.6	18397													235	204.844	183.936	946.966	2268.18	161.214	440.926	183.97
	236	20497.7	18528.7	94408.7	227163	16130	44102	18511.3													236	204.977	185.287	944.087	2271.63	161.3	441.02	185.113
	237	20501.5	18521.5	94608	227564	16106.8	44081.9	18454.1													237	205.015	185.215	946.08	2275.64	161.068	440.819	184.541
	238	20542.6	18480.7	94567.9	227795	16159.9	44083.5	18397.3													238	205.426	184.807	945.679	2277.95	161.599	440.835	183.973
	239	20506.2	18491.4	94292.5	228079	16048.6	43893.4	18497													239	205.062	184.914	942.925	2280.79	160.486	438.934	184.97
	240	20549.2	18488.2	94648.8	228128	16182.7	43987.7	18523.9													240	205.492	184.882	946.488	2281.28	161.827	439.877	185.239
	241	20491.8	18476.1	94456.1	228500	16098	44094.7	18588.4													241	204.918	184.761	944.561	2285	160.98	440.947	185.884
	242	20534.1	18530.7	94535.1	228804	16126.5	44036.8	18544.1													242	205.341	185.307	945.351	2288.04	161.265	440.368	185.441
	243	20597.5	18468.1	94665.6	228920	16010.4	44015.1	18580.7													243	205.975	184.681	946.656	2289.2	160.104	440.151	185.807
	244	20529.8	18388.8	94364.8	229195	16040.7	44018.1	18524.1													244	205.298	183.888	943.648	2291.95	160.407	440.181	185.241
	245	20433.5	18470.5	94375.6	229377	16137	43835.8	18588.8													245	204.335	184.705	943.756	2293.77	161.37	438.358	185.888
	246	20429.3	18403.2	94441.2	229856	16085.2	44031	18554.8													246	204.293	184.032	944.412	2298.56	160.852	440.31	185.548
	247	20506.8	18409.1	94282.2	230038	16053.3	43909.3	18523.6													247	205.068	184.091	942.822	2300.38	160.533	439.093	185.236
	248	20502.6	18459	94490.6	230268	16099.4	43791.4	18610.6													248	205.026	184.59	944.906	2302.68	160.994	437.914	186.106
	249	20520.8	18544.4	94477.6	230459	16111.4	43965.3	18654.9													249	205.208	185.444	944.776	2304.59	161.114	439.653	186.549
	250	20434.7	18492.8	94413.8	230649	16183.2	43900.1	18623													250	204.347	184.928	944.138	2306.49	161.832	439.001	186.23
	251	20559.9	18447.1	94477.5	230731	16095.5	43849.1	18622.7													251	205.599	184.471	944.775	2307.31	160.955	438.491	186.227
	252	20487	18559.8	94526.8	230859	16059.6	43962.7	18655													252	204.87	185.598	945.268	2308.59	160.596	439.627	186.55
	253	20580.7	18474.4	94450.1	231020	16102.7	43845.9	18723.4													253	205.807	184.744	944.501	2310.2	161.027	438.459	187.234
	254	20623.4	18552.8	94442.5	231158	16161.3	43807	18600.3													254	206.234	185.528	944.425	2311.58	161.613	438.07	186.003
	255	20476	18429.7	94128.2	231732	16115.8	43831	18710.1													255	204.76	184.297	941.282	2317.32	161.158	438.31	187.101
	256	20531.4	18488.2	94199.4	231731	16082	43834.1	18720.8													256	205.314	184.882	941.994	2317.31	160.82	438.341	187.208
	257	20561.8	18491.8	94323.8	232136	16093.5	43891.1	18731.7													257	205.618	184.918	943.238	2321.36	160.935	438.911	187.317
	258	20545.7	18291.6	94301.5	232370	16128.2	43894.4	18652.5													258	205.457	182.916	943.015	2323.7	161.282	438.944	186.525
	259	20542.8	18497.2	94347.5	232441	16126.2	43822.9	18733.4													259	205.428	184.972	943.475	2324.41	161.262	438.229	187.334
	260	20534.2	18441.4	94335.5	232782	16041.8	43798.5	18765.5													260	205.342	184.414	943.355	2327.82	160.418	437.985	187.655
	261	20599.8	18408.1	94221.1	232850	16108.2	43812.1	18710.6													261	205.998	184.081	942.211	2328.5	161.082	438.121	187.106
	262	20618	18380.4	94400	233019	16178.4	43823.5	18730													262	206.18	183.804	944	2330.19	161.784	438.235	187.3
	263	20528	18534	94155.4	233061	16122	43694.4	18783.5													263	205.28	185.34	941.554	2330.61	161.22	436.944	187.835
	264	20542.9	18371.3	94145.4	233595	16120.1	43817.2	18850.2													264	205.429	183.713	941.454	2335.95	161.201	438.172	188.502
	265	20614.3	18487.8	94076.8	233939	16111.8	43797.6	18728.9													265	206.143	184.878	940.768	2339.39	161.118	437.976	187.289
	266	20599.2	18502.2	94063.8	233793	16096.2	43905.2	18878.3													266	205.992	185.022	940.638	2337.93	160.962	439.052	188.783
	267	20568.6	18483.3	94152.4	234217	16065.3	43727.1	18893.9													267	205.686	184.833	941.524	2342.17	160.653	437.271	188.939
	268	20534.8	18374.8	94101.6	234734	16007.1	43812.5	18862.9													268	205.348	183.748	941.016	2347.34	160.071	438.125	188.629
	269	20570.3	18438.3	94055.3	234701	16145.5	43746	18887.5													269	205.703	184.383	940.553	2347.01	161.455	437.46	188.875
	270	20583.1	18404.8	94024.4	234856	16096.2	43665.7	18823.8													270	205.831	184.048	940.244	2348.56	160.962	436.657	188.238
	271	20503.2	18451.1	94190.9	235053	16120.2	43857.6	18966.7													271	205.032	184.511	941.909	2350.53	161.202	438.576	189.667
	272	20569	18540.7	94058.2	235540	16087.3	43886.1	19033.6													272	205.69	185.407	940.582	2355.4	160.873	438.861	190.336
	273	20527.5	18408.7	94092.7	235346	16104.2	43762	18947													273	205.275	184.087	940.927	2353.46	161.042	437.62	189.47
	274	20574.6	18491.6	94107.9	235648	16132.5	43768	18983.8													274	205.746	184.916	941.079	2356.48	161.325	437.68	189.838
	275	20510.3	18466.8	93935.9	235726	16101.7	43634	18919.3													275	205.103	184.668	939.359	2357.26	161.017	436.34	189.193
	276	20597.9	18447.3	93912.7	235943	16054.9	43635.6	18967.6													276	205.979	184.473	939.127	2359.43	160.549	436.356	189.676
	277	20549.8	18442.9	94128.2	235932	16117.5	43802.4	18982													277	205.498	184.429	941.282	2359.32	161.175	438.024	189.82
	278	20573.6	18491.2	94054.7	236459	16008.9	43580.5	19007.3													278	205.736	184.912	940.547	2364.59	160.089	435.805	190.073
	279	20470.2	18434	93949.9	236526	16157.8	43673.6	18840.9													279	204.702	184.34	939.499	2365.26	161.578	436.736	188.409
	280	20463.6	18410.4	94165.8	236650	16159.1	43581.7	18967													280	204.636	184.104	941.658	2366.5	161.591	435.817	189.67
	281	20556	18504.4	93963.2	236920	16155.9	43672.6	18955.6													281	205.56	185.044	939.632	2369.2	161.559	436.726	189.556
	282	20493.2	18469.4	94011.4	237116	16120	43765.8	19093.3													282	204.932	184.694	940.114	2371.16	161.2	437.658	190.933
	283	20572.7	18527.2	93967.2	237129	16167	43656.2	19074.2													283	205.727	185.272	939.672	2371.29	161.67	436.562	190.742
	284	20517	18539.6	94046.2	237219	16151.4	43615.3	19006.6													284	205.17	185.396	940.462	2372.19	161.514	436.153	190.066
	285	20476.6	18493.8	93853.4	237528	16172.5	43522.5	19087													285	204.766	184.938	938.534	2375.28	161.725	435.225	190.87
	286	20593.2	18461.9	93971.4	237850	16132.7	43605.1	19096.8													286	205.932	184.619	939.714	2378.5	161.327	436.051	190.968
	287	20559.1	18433.7	93915.7	238029	16138.9	43560.3	19187.7													287	205.591	184.337	939.157	2380.29	161.389	435.603	191.877
	288	20465.6	18385.3	93857.7	238007	16146.5	43598.7	19069.1													288	204.656	183.853	938.577	2380.07	161.465	435.987	190.691
	289	20466.5	18362	93905	238274	16083.6	43727.9	19101.5													289	204.665	183.62	939.05	2382.74	160.836	437.279	191.015
	290	20537.4	18402	93877.1	238490	16132.5	43729.5	19156.4													290	205.374	184.02	938.771	2384.9	161.325	437.295	191.564
	291	20488.8	18506.4	93923.3	238439	16070.6	43561.4	19200.6													291	204.888	185.064	939.233	2384.39	160.706	435.614	192.006
	292	20620.1	18430.8	93956.2	238644	16165.4	43449.4	19301.5													292	206.201	184.308	939.562	2386.44	161.654	434.494	193.015
	293	20472.6	18447.6	93691.6	239126	16162.1	43595.7	19213.7													293	204.726	184.476	936.916	2391.26	161.621	435.957	192.137
	294	20560.5	18440.7	93870	239131	16014.7	43555.5	19229.8													294	205.605	184.407	938.7	2391.31	160.147	435.555	192.298
	295	20582.9	18534.4	93929.8	239413	16084.3	43700	19199.8													295	205.829	185.344	939.298	2394.13	160.843	437	191.998
	296	20499.9	18519.5	93844.2	239498	16173.1	43453	19219													296	204.999	185.195	938.442	2394.98	161.731	434.53	192.19
	297	20559.7	18424.6	93608.2	239814	16141.4	43697.7	19304.4													297	205.597	184.246	936.082	2398.14	161.414	436.977	193.044
	298	20632.9	18499.4	93653	239660	16190.3	43444.4	19214.8													298	206.329	184.994	936.53	2396.6	161.903	434.444	192.148
	299	20518.9	18456.2	93839.9	239780	16138.5	43550	19247.2													299	205.189	184.562	938.399	2397.8	161.385	435.5	192.472
	300	20587.8	18423.8	93768.6	240105	16124.1	43481.8	19337.9													300	205.878	184.238	937.686	2401.05	161.241	434.818	193.379
	301	20559.2	18421.1	93906.5	240238	16201.8	43570.9	19349													301	205.592	184.211	939.065	2402.38	162.018	435.709	193.49
	302	20595.9	18412.6	93778.3	240780	16090.2	43436.7	19348													302	205.959	184.126	937.783	2407.8	160.902	434.367	193.48
	303	20587	18468.2	93757.2	240386	16103.8	43605.5	19302.2													303	205.87	184.682	937.572	2403.86	161.038	436.055	193.022
	304	20605.1	18439.4	93678.6	240674	16174	43689.8	19273.9													304	206.051	184.394	936.786	2406.74	161.74	436.898	192.739
	305	20544.9	18483	93671.8	240762	16096.3	43549	19317.2													305	205.449	184.83	936.718	2407.62	160.963	435.49	193.172
	306	20504.5	18404.1	93612.7	241338	16103.2	43586	19362.3													306	205.045	184.041	936.127	2413.38	161.032	435.86	193.623
	307	20648.6	18493.7	93664.1	240770	16154.7	43462.4	19294.4													307	206.486	184.937	936.641	2407.7	161.547	434.624	192.944
	308	20545.9	18431.7	93653.2	241089	16136.7	43580.6	19343.4													308	205.459	184.317	936.532	2410.89	161.367	435.806	193.434
	309	20543.6	18475.2	93697.7	241606	16195.7	43496.3	19445.7													309	205.436	184.752	936.977	2416.06	161.957	434.963	194.457
	310	20533	18426.2	93698.5	241615	16189.4	43539	19496.7													310	205.33	184.262	936.985	2416.15	161.894	435.39	194.967
	311	20565.1	18503	93517.9	241814	16160.9	43445.4	19407.4													311	205.651	185.03	935.179	2418.14	161.609	434.454	194.074
	312	20524.5	18426.5	93687.7	242019	16210	43451.3	19441.8													312	205.245	184.265	936.877	2420.19	162.1	434.513	194.418
	313	20539.1	18432.8	93723.5	242161	16137.6	43526.7	19546.5													313	205.391	184.328	937.235	2421.61	161.376	435.267	195.465
	314	20612.1	18419.7	93430.5	242231	16147.8	43439	19527.5													314	206.121	184.197	934.305	2422.31	161.478	434.39	195.275
	315	20510.2	18450.6	93465.2	242181	16073.4	43489.8	19468.9													315	205.102	184.506	934.652	2421.81	160.734	434.898	194.689
	316	20608.8	18398.5	93666.5	242750	16054.8	43586.1	19491.6													316	206.088	183.985	936.665	2427.5	160.548	435.861	194.916
	317	20558.7	18548.8	93409.6	242656	16183.4	43453.3	19416.8													317	205.587	185.488	934.096	2426.56	161.834	434.533	194.168
	318	20616.7	18363.4	93572.4	242681	16042.6	43463.1	19488.2													318	206.167	183.634	935.724	2426.81	160.426	434.631	194.882
	319	20514.8	18374.6	93491.8	242954	16066.4	43464	19533.9													319	205.148	183.746	934.918	2429.54	160.664	434.64	195.339
	320	20597.9	18393.2	93398.3	243053	16196.4	43303.8	19650.6													320	205.979	183.932	933.983	2430.53	161.964	433.038	196.506
	321	20514.9	18491.1	93608.2	243464	16138	43405.8	19592.4													321	205.149	184.911	936.082	2434.64	161.38	434.058	195.924
	322	20523.9	18502.5	93650.1	243572	16203.5	43371.3	19598.3													322	205.239	185.025	936.501	2435.72	162.035	433.713	195.983
	323	20582.6	18465.1	93442.1	243529	16091.8	43470.6	19501.3													323	205.826	184.651	934.421	2435.29	160.918	434.706	195.013
	324	20469.8	18424.2	93461.8	243538	16123.7	43456.6	19565.6													324	204.698	184.242	934.618	2435.38	161.237	434.566	195.656
	325	20528.8	18473.5	93408.4	243925	16210.2	43578.6	19692.6													325	205.288	184.735	934.084	2439.25	162.102	435.786	196.926
	326	20702.8	18487.7	93522	244120	16174.4	43427.3	19681.4													326	207.028	184.877	935.22	2441.2	161.744	434.273	196.814
	327	20598.8	18466.5	93548	244066	16193.1	43475.4	19681.7													327	205.988	184.665	935.48	2440.66	161.931	434.754	196.817
	328	20634.9	18411.4	93655.9	244442	16199.9	43416.1	19586.7													328	206.349	184.114	936.559	2444.43	161.999	434.161	195.867
	329	20499.4	18410.6	93683	244381	16116.6	43515.6	19806.3													329	204.994	184.106	936.83	2443.81	161.166	435.156	198.063
	330	20631.2	18448.7	93358.7	244347	16045.7	43390.8	19617.6													330	206.312	184.487	933.587	2443.47	160.457	433.908	196.176
	331	20554.9	18409.7	93396.1	244630	16092.8	43381.5	19634.7													331	205.549	184.097	933.961	2446.3	160.928	433.815	196.347
	332	20529.7	18381.4	93448.7	244767	16168	43358.5	19771.3													332	205.297	183.814	934.487	2447.67	161.68	433.585	197.713
	333	20626.3	18357.5	93361.7	244733	16187.5	43373.3	19690.7													333	206.263	183.575	933.617	2447.33	161.875	433.733	196.907
	334	20567.9	18489.6	93268.1	244815	16041.4	43439.8	19750.8													334	205.679	184.896	932.681	2448.15	160.414	434.398	197.508
	335	20633	18395.5	93460.7	244983	16150.8	43312	19768.1													335	206.33	183.955	934.607	2449.83	161.508	433.12	197.681
	336	20529.8	18399.9	93223	245228	16238.8	43293.3	19739.7													336	205.298	183.999	932.23	2452.28	162.388	432.933	197.397
	337	20617.5	18373.8	93444.1	245142	16132.7	43310.5	19672.4													337	206.175	183.738	934.441	2451.42	161.327	433.105	196.724
	338	20545.8	18457.9	93310.9	245459	16192.7	43384.8	19719.9													338	205.458	184.579	933.109	2454.59	161.927	433.848	197.199
	339	20517.7	18539.8	93301.4	245423	16165.8	43490.4	19821.8													339	205.177	185.398	933.014	2454.23	161.658	434.904	198.218
	340	20465.4	18382.9	93311	245776	16118.4	43322	19733.7													340	204.654	183.829	933.11	2457.76	161.184	433.22	197.337
	341	20582.2	18454.6	93424.3	245894	16116	43397.8	19769.7													341	205.822	184.546	934.243	2458.94	161.16	433.978	197.697
	342	20584.7	18395.2	93501.8	246039	16040.9	43367	19752.5													342	205.847	183.952	935.018	2460.39	160.409	433.67	197.525
	343	20484.3	18432	93422.7	245951	16055.5	43347.5	19827.4													343	204.843	184.32	934.227	2459.51	160.555	433.475	198.274
	344	20540	18342	93390.9	246371	16178.9	43318.2	19851.5													344	205.4	183.42	933.909	2463.71	161.789	433.182	198.515
	345	20549	18391.3	93476.8	246245	16255.1	43147.7	19786.8													345	205.49	183.913	934.768	2462.45	162.551	431.477	197.868
	346	20597.2	18456	93264.3	246459	16255.8	43275.9	19839.9													346	205.972	184.56	932.643	2464.59	162.558	432.759	198.399
	347	20495.3	18397.6	93280.3	246792	16069.8	43257.4	19907													347	204.953	183.976	932.803	2467.92	160.698	432.574	199.07
	348	20648.7	18431.4	93335.5	246399	16093.5	43243.3	19868.5													348	206.487	184.314	933.355	2463.99	160.935	432.433	198.685
	349	20581.8	18424.5	93261.6	246822	16171.8	43357.1	19946.8													349	205.818	184.245	932.616	2468.22	161.718	433.571	199.468
	350	20528.3	18432	93317.1	247344	16128.4	43404	19908.9													350	205.283	184.32	933.171	2473.44	161.284	434.04	199.089
	351	20595	18434.8	93323.9	246894	16172.3	43177.1	19885.9													351	205.95	184.348	933.239	2468.94	161.723	431.771	198.859
	352	20540.9	18445.9	93177.9	247145	16104.3	43269.2	19929.4													352	205.409	184.459	931.779	2471.45	161.043	432.692	199.294
	353	20638.6	18346.2	93152.8	247131	16161.2	43281.4	19869.8													353	206.386	183.462	931.528	2471.31	161.612	432.814	198.698
	354	20561.4	18454.7	93159.6	247059	16146.6	43343.5	19883.7													354	205.614	184.547	931.596	2470.59	161.466	433.435	198.837
	355	20577.1	18391.3	93237.9	247314	16114.2	43338	19904.2													355	205.771	183.913	932.379	2473.14	161.142	433.38	199.042
	356	20551.5	18383.7	93276.5	247775	16108.6	43244.1	19884.8													356	205.515	183.837	932.765	2477.75	161.086	432.441	198.848
	357	20482.4	18459.2	93216.5	247886	16137.7	43199.1	19955.2													357	204.824	184.592	932.165	2478.86	161.377	431.991	199.552
	358	20519.6	18440.9	93158	247568	16176.3	43184.2	19937.8													358	205.196	184.409	931.58	2475.68	161.763	431.842	199.378
	359	20537	18405.5	93186.2	247660	16148.8	43238.2	19837.9													359	205.37	184.055	931.862	2476.6	161.488	432.382	198.379
	360	20545	18435.6	93277.9	248032	15989.5	43171.7	19883.4													360	205.45	184.356	932.779	2480.32	159.895	431.717	198.834
	361	20580.3	18438.4	93223.1	248066	16143.1	43204.8	20033.1													361	205.803	184.384	932.231	2480.66	161.431	432.048	200.331
	362	20564.5	18373.5	93244.9	248240	16060.1	43244.7	19978.8													362	205.645	183.735	932.449	2482.4	160.601	432.447	199.788
	363	20556.5	18379.8	93289.2	248117	16168.1	43043.9	20006.1													363	205.565	183.798	932.892	2481.17	161.681	430.439	200.061
	364	20632.7	18440.6	93179	248206	16169.1	43195.4	20006.6													364	206.327	184.406	931.79	2482.06	161.691	431.954	200.066
	365	20590.1	18526.8	92968.7	248434	16184.2	43242.4	20015.2													365	205.901	185.268	929.687	2484.34	161.842	432.424	200.152
	366	20544.2	18433.7	93029.1	248710	16154.2	43034.5	20008.9													366	205.442	184.337	930.291	2487.1	161.542	430.345	200.089
	367	20583.3	18358.7	93258.6	248563	16108.5	43291.6	20037.1													367	205.833	183.587	932.586	2485.63	161.085	432.916	200.371
	368	20603.8	18438.7	93093.8	248943	16159.7	43284.2	20109.9													368	206.038	184.387	930.938	2489.43	161.597	432.842	201.099
	369	20537.9	18401.5	93187.4	249007	16127.2	43214.4	20108.9													369	205.379	184.015	931.874	2490.07	161.272	432.144	201.089
	370	20635.7	18352.1	93121.4	249066	16130.7	43133.8	20057.3													370	206.357	183.521	931.214	2490.66	161.307	431.338	200.573
	371	20564.9	18446.9	93052.8	249104	16121.6	43229.4	20116.3													371	205.649	184.469	930.528	2491.04	161.216	432.294	201.163
	372	20530.8	18495.2	93110.6	249354	16163.9	43073.5	20112.6													372	205.308	184.952	931.106	2493.54	161.639	430.735	201.126
	373	20569.1	18424.2	93052	249103	16184.6	43129.4	20092.5													373	205.691	184.242	930.52	2491.03	161.846	431.294	200.925
	374	20427.1	18310.6	92873.2	249201	16122.5	43223.1	20080													374	204.271	183.106	928.732	2492.01	161.225	432.231	200.8
	375	20451.1	18357.2	92994.7	249356	16167.7	43263.6	20113.5													375	204.511	183.572	929.947	2493.56	161.677	432.636	201.135
	376	20617.4	18398.5	93052.8	249461	16097.1	43102.2	20137.4													376	206.174	183.985	930.528	2494.61	160.971	431.022	201.374
	377	20491.4	18452.7	93148.5	249717	16214.9	43032.3	20120.5													377	204.914	184.527	931.485	2497.17	162.149	430.323	201.205
	378	20591.5	18411.6	92914.1	249564	16169.5	43049.9	20189.4													378	205.915	184.116	929.141	2495.64	161.695	430.499	201.894
	379	20521.5	18487.8	92958.9	249788	16118.2	42996.8	20111.4													379	205.215	184.878	929.589	2497.88	161.182	429.968	201.114
	380	20497.3	18404.3	92821.3	250045	16109.1	43114.1	20062.4													380	204.973	184.043	928.213	2500.45	161.091	431.141	200.624
	381	20642.8	18458.6	92854.7	250139	16176.1	43044.9	20214.9													381	206.428	184.586	928.547	2501.39	161.761	430.449	202.149
	382	20605.6	18463.5	92941.7	250055	16163.8	43062.6	20170.4													382	206.056	184.635	929.417	2500.55	161.638	430.626	201.704
	383	20593.4	18422.5	92696.2	250197	16152.2	43199.9	20093.2													383	205.934	184.225	926.962	2501.97	161.522	431.999	200.932
	384	20624.2	18403	92986.3	250292	16079.3	43163.6	20154.5													384	206.243	184.03	929.863	2502.92	160.793	431.636	201.545
	385	20570.8	18391.9	92891.2	250508	16219.5	43088	20142.9													385	205.708	183.919	928.912	2505.08	162.195	430.88	201.429
	386	20622.2	18481	92863.5	250382	16164.8	43009.9	20180.2													386	206.222	184.81	928.635	2503.82	161.648	430.099	201.802
	387	20639.9	18414.5	92896.6	250778	16152.5	43036.1	20220.9													387	206.399	184.145	928.966	2507.78	161.525	430.361	202.209
	388	20561	18401.2	93053.2	250671	16149.3	42968.1	20234.3													388	205.61	184.012	930.532	2506.71	161.493	429.681	202.343
	389	20606.7	18440.5	92859.8	250738	16196.6	43131.1	20171.2													389	206.067	184.405	928.598	2507.38	161.966	431.311	201.712
	390	20531.8	18472.7	92987.9	250729	16234.9	42993.2	20253.7													390	205.318	184.727	929.879	2507.29	162.349	429.932	202.537
	391	20499.4	18436.3	92946	250900	16196.7	43154.3	20275.6													391	204.994	184.363	929.46	2509	161.967	431.543	202.756
	392	20517.3	18442.4	92812.6	250974	16191.3	42944.2	20223.4													392	205.173	184.424	928.126	2509.74	161.913	429.442	202.234
	393	20512.5	18434.5	92801.2	251126	16094.9	43083.8	20251.5													393	205.125	184.345	928.012	2511.26	160.949	430.837	202.515
	394	20550.7	18501.7	92912.1	251053	16122.2	43087.1	20296.4													394	205.507	185.017	929.121	2510.53	161.222	430.871	202.964
	395	20631	18490.3	92910.4	251409	16172.3	43226.8	20172.2													395	206.31	184.903	929.104	2514.09	161.723	432.268	201.722
	396	20623.2	18470.2	92722.9	251391	16216.7	43063.1	20380.9													396	206.232	184.702	927.229	2513.91	162.167	430.631	203.809
	397	20593.2	18430	92963.5	251281	16194.8	43107.4	20318.1													397	205.932	184.3	929.635	2512.81	161.948	431.074	203.181
	398	20546.5	18454.3	92762.9	251698	16118.6	43004.4	20317.2													398	205.465	184.543	927.629	2516.98	161.186	430.044	203.172
	399	20554.4	18439.3	93036	251355	16125.2	43135.7	20396.5													399	205.544	184.393	930.36	2513.55	161.252	431.357	203.965
	400	20590.2	18506	92708.1	251508	16141.9	43041	20437.9													400	205.902	185.06	927.081	2515.08	161.419	430.41	204.379
	401	20490.7	18408.1	92794.1	251763	16198.3	42958.4	20324.5													401	204.907	184.081	927.941	2517.63	161.983	429.584	203.245
	402	20506	18402.3	92780.3	251792	16192.5	43051.4	20294.7													402	205.06	184.023	927.803	2517.92	161.925	430.514	202.947
	403	20522.2	18467.9	92974.3	252038	16096.6	42987.2	20262.1													403	205.222	184.679	929.743	2520.38	160.966	429.872	202.621
	404	20658.5	18509.3	92853.5	252018	16169.8	43017.2	20389.2													404	206.585	185.093	928.535	2520.18	161.698	430.172	203.892
	405	20652.2	18456.2	92791.5	252043	16099.8	42921.6	20269.2													405	206.522	184.562	927.915	2520.43	160.998	429.216	202.692
	406	20525.3	18453.8	92743.2	252094	16148.5	43023.1	20370.6													406	205.253	184.538	927.432	2520.94	161.485	430.231	203.706
	407	20558.1	18383.4	92890.5	252064	16120.3	42988.6	20321.8													407	205.581	183.834	928.905	2520.64	161.203	429.886	203.218
	408	20655	18389.9	92667.3	252472	16144.5	42940	20462.7													408	206.55	183.899	926.673	2524.72	161.445	429.4	204.627
	409	20652.3	18509.6	92846.5	252459	16231.5	43070.5	20426.6													409	206.523	185.096	928.465	2524.59	162.315	430.705	204.266
	410	20491	18481	92826.6	252484	16157.5	43053.5	20354.7													410	204.91	184.81	928.266	2524.84	161.575	430.535	203.547
	411	20625.6	18399	92700.4	252578	16123.8	42974.7	20387.2													411	206.256	183.99	927.004	2525.78	161.238	429.747	203.872
	412	20552.7	18401.9	92586.2	252604	16081.2	42929.8	20404													412	205.527	184.019	925.862	2526.04	160.812	429.298	204.04
	413	20471.2	18356	92871.4	252557	16155.4	42963.3	20335.9													413	204.712	183.56	928.714	2525.57	161.554	429.633	203.359
	414	20544.6	18464	92592.5	253022	16146.2	42960.5	20458.9													414	205.446	184.64	925.925	2530.22	161.462	429.605	204.589
	415	20616.7	18559.2	92834.8	252880	16122	42993	20390.1													415	206.167	185.592	928.348	2528.8	161.22	429.93	203.901
	416	20544.6	18448.9	92746.5	252802	16144	42982.1	20426.1													416	205.446	184.489	927.465	2528.02	161.44	429.821	204.261
	417	20524	18479	92795.3	253097	16144.3	43027.2	20449.4													417	205.24	184.79	927.953	2530.97	161.443	430.272	204.494
	418	20578.5	18426.7	92545	252901	16130.8	42969.2	20462.5													418	205.785	184.267	925.45	2529.01	161.308	429.692	204.625
	419	20497.1	18433.8	92527.6	253240	16150	42954.9	20498													419	204.971	184.338	925.276	2532.4	161.5	429.549	204.98
	420	20595.3	18437.2	92730.8	253052	16178.7	42938	20482.2													420	205.953	184.372	927.308	2530.52	161.787	429.38	204.822
	421	20619.8	18431.3	92687.2	253140	16200.6	42957.5	20454.1													421	206.198	184.313	926.872	2531.4	162.006	429.575	204.541
	422	20568	18356.1	92657.9	253345	16125.9	42957.5	20565.8													422	205.68	183.561	926.579	2533.45	161.259	429.575	205.658
	423	20595.7	18433	92667.6	253477	16185	42844.7	20442.9													423	205.957	184.33	926.676	2534.77	161.85	428.447	204.429
	424	20588.9	18339	92756.8	253145	16168.2	42924.1	20508.9													424	205.889	183.39	927.568	2531.45	161.682	429.241	205.089
	425	20568.4	18525	92624.5	253407	16151.6	42891	20569.4													425	205.684	185.25	926.245	2534.07	161.516	428.91	205.694
	426	20624.3	18453.3	92598.3	253675	16076.4	43005.6	20528.6													426	206.243	184.533	925.983	2536.75	160.764	430.056	205.286
	427	20582.2	18429	92625.5	253621	16051.9	42958.4	20563.8													427	205.822	184.29	926.255	2536.21	160.519	429.584	205.638
	428	20646.9	18369.3	92653	253284	16183.2	43031.6	20422													428	206.469	183.693	926.53	2532.84	161.832	430.316	204.22
	429	20646.5	18499.3	92391.5	253555	16137.8	42888.2	20555													429	206.465	184.993	923.915	2535.55	161.378	428.882	205.55
	430	20548.7	18455.9	92633.3	253721	16071.9	42982.9	20432.4													430	205.487	184.559	926.333	2537.21	160.719	429.829	204.324
	431	20504.9	18384.5	92545.7	253652	16164.2	42862.1	20507.5													431	205.049	183.845	925.457	2536.52	161.642	428.621	205.075
	432	20605.4	18419.9	92205.2	253829	16020.7	42904.4	20587.4													432	206.054	184.199	922.052	2538.29	160.207	429.044	205.874
	433	20631.1	18461.5	92601.6	254219	16109.3	42968.6	20550.7													433	206.311	184.615	926.016	2542.19	161.093	429.686	205.507
	434	20692.9	18396.7	92396.8	254083	16154.1	43031.7	20667													434	206.929	183.967	923.968	2540.83	161.541	430.317	206.67
	435	20685.5	18427.1	92653.3	253658	16105.4	42876.4	20558.4													435	206.855	184.271	926.533	2536.58	161.054	428.764	205.584
	436	20630.5	18479.2	92678	254160	16091.6	42882.4	20559.3													436	206.305	184.792	926.78	2541.6	160.916	428.824	205.593
	437	20675.2	18475.3	92639	254372	16113.5	42782.9	20568.4													437	206.752	184.753	926.39	2543.72	161.135	427.829	205.684
	438	20619.1	18356.3	92545.5	254239	16102.7	42956.9	20731.8													438	206.191	183.563	925.455	2542.39	161.027	429.569	207.317
	439	20631.1	18408.7	92386.7	254292	16221.3	42778.5	20586.9													439	206.311	184.087	923.867	2542.92	162.213	427.785	205.869
	440	20525.2	18436.7	92321.7	254261	16162.7	42844.1	20597.6													440	205.252	184.367	923.217	2542.61	161.627	428.441	205.976
	441	20622.9	18371.6	92533.9	254226	16188	42907.3	20629.4													441	206.229	183.716	925.339	2542.26	161.88	429.073	206.294
	442	20572.1	18445.2	92402.2	254579	16217.9	42933.5	20657.7													442	205.721	184.452	924.022	2545.79	162.179	429.335	206.577
	443	20501.2	18466.7	92584.3	254386	16126.4	42731.8	20704.5													443	205.012	184.667	925.843	2543.86	161.264	427.318	207.045
	444	20655.5	18427.2	92341	254539	16136.4	42931.4	20600.4													444	206.555	184.272	923.41	2545.39	161.364	429.314	206.004
	445	20570.2	18447.5	92686.8	254351	16150.5	42910	20681.8													445	205.702	184.475	926.868	2543.51	161.505	429.1	206.818
	446	20681.3	18458.3	92597.3	254470	16135.6	42870.6	20727.7													446	206.813	184.583	925.973	2544.7	161.356	428.706	207.277
	447	20633.3	18354.5	92428.5	254782	16164.7	42800.8	20702.8													447	206.333	183.545	924.285	2547.82	161.647	428.008	207.028
	448	20607.1	18389.1	92409.6	254864	16132.9	42732	20669.6													448	206.071	183.891	924.096	2548.64	161.329	427.32	206.696
	449	20623.2	18405.4	92524.4	254671	16115.2	42905.4	20687													449	206.232	184.054	925.244	2546.71	161.152	429.054	206.87
	450	20546.7	18462.4	92481	254989	16091.9	42841.7	20695.7													450	205.467	184.624	924.81	2549.89	160.919	428.417	206.957
	451	20599.4	18418.2	92293.6	254929	16100.1	42830.7	20743.2													451	205.994	184.182	922.936	2549.29	161.001	428.307	207.432
	452	20544.7	18459.9	92374.3	255122	16188.9	42937.1	20720													452	205.447	184.599	923.743	2551.22	161.889	429.371	207.2
	453	20461.6	18411.2	92362.1	254788	16143.1	42893.8	20710.4													453	204.616	184.112	923.621	2547.88	161.431	428.938	207.104
	454	20610.8	18361.8	92448.1	255368	16165.5	42698.7	20666.8													454	206.108	183.618	924.481	2553.68	161.655	426.987	206.668
	455	20600.7	18297.1	92324.5	254928	16130.7	42858.4	20809.4													455	206.007	182.971	923.245	2549.28	161.307	428.584	208.094
	456	20620.6	18409	92236.4	255304	16278.6	42833	20751													456	206.206	184.09	922.364	2553.04	162.786	428.33	207.51
	457	20582.2	18489	92415.6	255355	16169.1	42920.8	20735.8													457	205.822	184.89	924.156	2553.55	161.691	429.208	207.358
	458	20516	18368.2	92243	255103	16171.8	42810.2	20604.2													458	205.16	183.682	922.43	2551.03	161.718	428.102	206.042
	459	20547.6	18429.8	92447.3	255105	16168.8	42791.5	20789.1													459	205.476	184.298	924.473	2551.05	161.688	427.915	207.891
	460	20587	18485.8	92388	255325	16037.1	42877.2	20768.7													460	205.87	184.858	923.88	2553.25	160.371	428.772	207.687
	461	20603.5	18419.9	92304.1	255251	16101.9	42786.2	20747.6													461	206.035	184.199	923.041	2552.51	161.019	427.862	207.476
	462	20515.3	18419.3	92299.1	255253	16198.2	42864	20784.9													462	205.153	184.193	922.991	2552.53	161.982	428.64	207.849
	463	20623.7	18459.7	92263.7	255611	16187	42781.8	20793.9													463	206.237	184.597	922.637	2556.11	161.87	427.818	207.939
	464	20542.4	18444.6	92257.5	255578	16034.7	42851.5	20736.3													464	205.424	184.446	922.575	2555.78	160.347	428.515	207.363
	465	20582.1	18366.5	92415.5	255589	16206.6	42710.8	20845.4													465	205.821	183.665	924.155	2555.89	162.066	427.108	208.454
	466	20571.3	18441.9	92248.7	255788	16196	42819.5	20796.7													466	205.713	184.419	922.487	2557.88	161.96	428.195	207.967
	467	20518.2	18409	92250.3	255792	16176.9	42790.8	20884													467	205.182	184.09	922.503	2557.92	161.769	427.908	208.84
	468	20619.4	18397.2	92260.4	255760	16255.9	42943.1	20761.5													468	206.194	183.972	922.604	2557.6	162.559	429.431	207.615
	469	20585.4	18416.1	92275.8	255640	16135.5	42766.9	20724.5													469	205.854	184.161	922.758	2556.4	161.355	427.669	207.245
	470	20605.9	18363.5	92237.4	255976	16275.6	42684.3	20795.5													470	206.059	183.635	922.374	2559.76	162.756	426.843	207.955
	471	20648.1	18446.2	92211.1	255840	16103.7	42757.7	20784.9													471	206.481	184.462	922.111	2558.4	161.037	427.577	207.849
	472	20564.3	18428.7	92016.9	255968	16165.3	42789.5	20820.9													472	205.643	184.287	920.169	2559.68	161.653	427.895	208.209
	473	20597.3	18450.3	92237.2	256065	16189.4	42757.2	20735.9													473	205.973	184.503	922.372	2560.65	161.894	427.572	207.359
	474	20506.3	18386.5	92096.3	255932	16219.2	42726.7	20923.3													474	205.063	183.865	920.963	2559.32	162.192	427.267	209.233
	475	20607	18375.8	92220.2	256232	16142.1	42747.6	20912													475	206.07	183.758	922.202	2562.32	161.421	427.476	209.12
	476	20547.5	18389.2	92190.4	256349	16144.7	42823.3	20834.4													476	205.475	183.892	921.904	2563.49	161.447	428.233	208.344
	477	20664.5	18417.9	92178.4	256176	16072.6	42691.5	20823.8													477	206.645	184.179	921.784	2561.76	160.726	426.915	208.238
	478	20544.4	18537.3	92217.8	256077	16040.5	42767.8	20913.7													478	205.444	185.373	922.178	2560.77	160.405	427.678	209.137
	479	20602.7	18396.2	92179.5	256231	16196.7	42637.2	20801													479	206.027	183.962	921.795	2562.31	161.967	426.372	208.01
	480	20619.1	18435.9	91859.8	256312	16167.2	42698.5	20922													480	206.191	184.359	918.598	2563.12	161.672	426.985	209.22
	481	20558.7	18426.8	92306.7	256081	16148.4	42703.4	20814.1													481	205.587	184.268	923.067	2560.81	161.484	427.034	208.141
	482	20570.3	18450.4	92097.3	256065	16239.5	42742.3	20979.4													482	205.703	184.504	920.973	2560.65	162.395	427.423	209.794
	483	20612.6	18446.4	92274.2	256584	16174.8	42724.8	20917.3													483	206.126	184.464	922.742	2565.84	161.748	427.248	209.173
	484	20583.6	18338.7	92357.6	256436	16171.1	42706.1	20872.5													484	205.836	183.387	923.576	2564.36	161.711	427.061	208.725
	485	20573.2	18387.9	92253.1	256587	16168.2	42728.5	20893.4													485	205.732	183.879	922.531	2565.87	161.682	427.285	208.934
	486	20614.9	18334.8	92114.6	256297	16109.7	42757.1	20998.9													486	206.149	183.348	921.146	2562.97	161.097	427.571	209.989
	487	20568.9	18459.9	92138.2	256779	16182.9	42755.8	20869.3													487	205.689	184.599	921.382	2567.79	161.829	427.558	208.693
	488	20560.8	18368	92093	256673	16186.7	42701.7	20840.8													488	205.608	183.68	920.93	2566.73	161.867	427.017	208.408
	489	20513.3	18385.2	92013.9	256544	16221.5	42684.8	20947.3													489	205.133	183.852	920.139	2565.44	162.215	426.848	209.473
	490	20637.8	18397.3	92395.6	256891	16171.9	42729.8	20934.2													490	206.378	183.973	923.956	2568.91	161.719	427.298	209.342
	491	20518.5	18482.3	92323	256552	16107.7	42650.3	21065.1													491	205.185	184.823	923.23	2565.52	161.077	426.503	210.651
	492	20603.4	18379.4	92314.4	256965	16226.9	42668.2	20853.2													492	206.034	183.794	923.144	2569.65	162.269	426.682	208.532
	493	20593.2	18360.7	92098.7	256618	16183.5	42877.5	20895.9													493	205.932	183.607	920.987	2566.18	161.835	428.775	208.959
	494	20507.3	18432.9	92077.8	256879	16200.9	42837	21022.4													494	205.073	184.329	920.778	2568.79	162.009	428.37	210.224
	495	20574.1	18418	92105.1	256659	16183.4	42584.4	21012.2													495	205.741	184.18	921.051	2566.59	161.834	425.844	210.122
	496	20631.2	18438.1	92065.9	257034	16069.3	42725.8	20962.6													496	206.312	184.381	920.659	2570.34	160.693	427.258	209.626
	497	20580.2	18388	92058.7	256436	16162.3	42755.9	20943.1													497	205.802	183.88	920.587	2564.36	161.623	427.559	209.431
	498	20480.9	18437	92087.6	256928	16185.8	42709.9	21012.5													498	204.809	184.37	920.876	2569.28	161.858	427.099	210.125
	499	20623.9	18449.6	92002.5	256977	16183.4	42676.4	21111.6													499	206.239	184.496	920.025	2569.77	161.834	426.764	211.116
	500	20600.6	18414.1	91848.7	257017	16109	42635.2	20974.1													500	206.006	184.141	918.487	2570.17	161.09	426.352	209.741
	501	20509.4	18381.6	91875.8	257211	16082.6	42529.3	20952.9													501	205.094	183.816	918.758	2572.11	160.826	425.293	209.529
	502	20596.2	18424.7	92084.7	257071	16099.6	42754.3	20978.5													502	205.962	184.247	920.847	2570.71	160.996	427.543	209.785
	503	20556.7	18371.8	91959.1	257276	16135	42695.5	21127.3													503	205.567	183.718	919.591	2572.76	161.35	426.955	211.273
	504	20539.8	18396.2	92077.8	257189	16155	42695.4	20908.9													504	205.398	183.962	920.778	2571.89	161.55	426.954	209.089
	505	20596.1	18424.8	92112.6	257125	16116.7	42686.4	20964.2													505	205.961	184.248	921.126	2571.25	161.167	426.864	209.642
	506	20598.4	18429.3	92081.5	257294	16118.3	42640	21128.4													506	205.984	184.293	920.815	2572.94	161.183	426.4	211.284
	507	20531.3	18366.2	92029.8	257355	16157.4	42648.4	21031.5													507	205.313	183.662	920.298	2573.55	161.574	426.484	210.315
	508	20565.7	18394.8	91784.8	257566	16166.1	42594.4	21050													508	205.657	183.948	917.848	2575.66	161.661	425.944	210.5
	509	20575.5	18466.2	92087.1	257490	16056.6	42691.3	20975.9													509	205.755	184.662	920.871	2574.9	160.566	426.913	209.759
	510	20575.8	18431.8	91890.8	257169	16109.5	42719	21083.1													510	205.758	184.318	918.908	2571.69	161.095	427.19	210.831
	511	20595.8	18383.4	91805.6	257196	16068.7	42583.9	20999													511	205.958	183.834	918.056	2571.96	160.687	425.839	209.99
	512	20600.9	18415.4	91882.9	257591	16119	42599.4	21075.8													512	206.009	184.154	918.829	2575.91	161.19	425.994	210.758
	513	20561	18493.3	91866.1	257373	16141.6	42602.7	21072.5													513	205.61	184.933	918.661	2573.73	161.416	426.027	210.725
	514	20647	18374.8	91948.2	257225	16102.7	42634.3	21124.2													514	206.47	183.748	919.482	2572.25	161.027	426.343	211.242
	515	20519.1	18421	91820.2	257381	16200	42705.5	21099.6													515	205.191	184.21	918.202	2573.81	162	427.055	210.996
	516	20577.3	18409.2	91860.4	257460	16133.7	42567	21103.5													516	205.773	184.092	918.604	2574.6	161.337	425.67	211.035
	517	20550.6	18407.2	91700.9	257617	16156.9	42603.2	21048.8													517	205.506	184.072	917.009	2576.17	161.569	426.032	210.488
	518	20538.7	18374.2	91920	257512	16188.5	42639.9	21066.1													518	205.387	183.742	919.2	2575.12	161.885	426.399	210.661
	519	20548.5	18448.9	91768.9	257535	16094.2	42631.1	21069.7													519	205.485	184.489	917.689	2575.35	160.942	426.311	210.697
	520	20597.1	18382.3	91961.6	257705	16218.1	42491.7	21074.1													520	205.971	183.823	919.616	2577.05	162.181	424.917	210.741
	521	20496.2	18334.5	91772	257598	16212.5	42609.1	21154.3													521	204.962	183.345	917.72	2575.98	162.125	426.091	211.543
	522	20633.7	18441.5	91756.7	257881	16222.5	42621	21088.8													522	206.337	184.415	917.567	2578.81	162.225	426.21	210.888
	523	20616.7	18467.8	91701.4	257653	16193.8	42630.6	21120.3													523	206.167	184.678	917.014	2576.53	161.938	426.306	211.203
	524	20604.6	18508.2	91903	257645	16174.9	42408.8	21039.7													524	206.046	185.082	919.03	2576.45	161.749	424.088	210.397
	525	20553.3	18379.4	91853	257791	16107.4	42584	21074.8													525	205.533	183.794	918.53	2577.91	161.074	425.84	210.748
	526	20507.5	18483.2	91833.8	257865	16191	42647.2	21075													526	205.075	184.832	918.338	2578.65	161.91	426.472	210.75
	527	20507.3	18386.4	91687.9	258040	16198.7	42618.8	21113.6													527	205.073	183.864	916.879	2580.4	161.987	426.188	211.136
	528	20575.7	18486.4	91637.1	257983	16257.2	42498.4	21095.1													528	205.757	184.864	916.371	2579.83	162.572	424.984	210.951
	529	20533.6	18439.3	91768.4	257965	16081	42526.7	21112.3													529	205.336	184.393	917.684	2579.65	160.81	425.267	211.123
	530	20481.1	18403	91644	257736	16182.7	42642.6	21186.3													530	204.811	184.03	916.44	2577.36	161.827	426.426	211.863
	531	20545.2	18394.1	91736.3	258054	16153.5	42534.5	21086													531	205.452	183.941	917.363	2580.55	161.535	425.345	210.86
	532	20572.6	18365.5	91585.9	257853	16175	42630.2	21212.2													532	205.726	183.655	915.859	2578.53	161.75	426.302	212.122
	533	20611.4	18448.9	91770	258047	16207.3	42475.7	21093													533	206.114	184.489	917.7	2580.47	162.073	424.757	210.93
	534	20535.4	18448.3	91782.9	257646	16092.2	42524.3	21232.2													534	205.354	184.483	917.829	2576.46	160.922	425.243	212.322
	535	20571.3	18366.1	91651.9	257990	16122.3	42554.8	21175.5													535	205.713	183.661	916.519	2579.9	161.223	425.548	211.755
	536	20548.5	18393.1	91624.6	257978	16126.9	42623.2	21169.8													536	205.485	183.931	916.246	2579.78	161.269	426.232	211.698
	537	20585.6	18387.6	91694.1	258074	16174.7	42641.5	21126.6													537	205.856	183.876	916.941	2580.74	161.747	426.415	211.266
	538	20546.3	18344.2	91658.9	258158	16225.7	42437.2	21112.5													538	205.463	183.442	916.589	2581.58	162.257	424.372	211.125
	539	20564	18387.2	91606.4	258144	16171.4	42682.3	21299.8													539	205.64	183.872	916.064	2581.44	161.714	426.823	212.998
	540	20643.3	18355.8	91679.6	258247	16192.6	42587.7	21208.6													540	206.433	183.558	916.796	2582.47	161.926	425.877	212.086
	541	20555.6	18347	91615.2	258444	16133.1	42713.1	21158.4													541	205.556	183.47	916.152	2584.44	161.331	427.131	211.584
	542	20578.8	18378.9	91408	257941	16098.1	42600.1	21180.7													542	205.788	183.789	914.08	2579.41	160.981	426.001	211.807
	543	20575.9	18462	91731.9	258201	16129	42686.3	21271.4													543	205.759	184.62	917.319	2582.01	161.29	426.863	212.714
	544	20596.1	18455.7	91548.2	258134	16158.8	42481.1	21263.1													544	205.961	184.557	915.482	2581.34	161.588	424.811	212.631
	545	20542	18434.4	91476.6	258158	16160.9	42672.5	21311.4													545	205.42	184.344	914.766	2581.58	161.609	426.725	213.114
	546	20650	18424.7	91418.8	258348	16119.7	42502.5	21318.8													546	206.5	184.247	914.188	2583.48	161.197	425.025	213.188
	547	20571.2	18420.3	91511.4	258371	16166.8	42620.9	21297.2													547	205.712	184.203	915.114	2583.71	161.668	426.209	212.972
	548	20668.8	18440.2	91482.8	258375	16041	42526.7	21214.6													548	206.688	184.402	914.828	2583.75	160.41	425.267	212.146
	549	20555.5	18402.7	91461.3	258062	16160.4	42528.6	21195.4													549	205.555	184.027	914.613	2580.62	161.604	425.286	211.954
	550	20585.6	18388.8	91629.2	258397	16125.2	42593.9	21289.1													550	205.856	183.888	916.292	2583.97	161.252	425.939	212.891
	551	20578.8	18388.1	91649.7	258462	16174.6	42567.7	21353.8													551	205.788	183.881	916.497	2584.62	161.746	425.677	213.538
	552	20535.7	18378.7	91645.7	258538	16166.4	42406.6	21273.3													552	205.357	183.787	916.457	2585.38	161.664	424.066	212.733
	553	20583.2	18500.3	91586.7	258370	16178	42504.3	21215.5													553	205.832	185.003	915.867	2583.7	161.78	425.043	212.155
	554	20577.5	18404.8	91562.9	258727	16102.1	42547.4	21216.2													554	205.775	184.048	915.629	2587.27	161.021	425.474	212.162
	555	20555.2	18450.1	91464.7	258458	16196.6	42526.3	21242.5													555	205.552	184.501	914.647	2584.58	161.966	425.263	212.425
	556	20579.9	18391.8	91464.5	258478	16147.2	42578.8	21317.9													556	205.799	183.918	914.645	2584.78	161.472	425.788	213.179
	557	20576.2	18381.3	91554.4	258592	16186.5	42494.7	21301.3													557	205.762	183.813	915.544	2585.92	161.865	424.947	213.013
	558	20539.3	18461.1	91498.1	258346	16129.7	42455.8	21235.6													558	205.393	184.611	914.981	2583.46	161.297	424.558	212.356
	559	20583.4	18425.4	91592.3	258609	16176.6	42600.8	21307.1													559	205.834	184.254	915.923	2586.09	161.766	426.008	213.071
	560	20549.8	18372	91314.7	258492	16151	42575.5	21316.5													560	205.498	183.72	913.147	2584.92	161.51	425.755	213.165
	561	20597.4	18443.4	91252.8	258821	16188.2	42613.5	21383.2													561	205.974	184.434	912.528	2588.21	161.882	426.135	213.832
	562	20565.3	18465.7	91476.6	258763	16116.4	42594.6	21420.5													562	205.653	184.657	914.766	2587.63	161.164	425.946	214.205
	563	20542.8	18446.5	91525.1	258467	16170.7	42592.1	21287.1													563	205.428	184.465	915.251	2584.67	161.707	425.921	212.871
	564	20600.7	18292.9	91547.3	258553	16143.4	42402	21371													564	206.007	182.929	915.473	2585.53	161.434	424.02	213.71
	565	20607.1	18342.5	91489	258699	16203.7	42558.8	21304.8													565	206.071	183.425	914.89	2586.99	162.037	425.588	213.048
	566	20579.3	18430.5	91390.4	258522	16118.7	42592.9	21266.9													566	205.793	184.305	913.904	2585.22	161.187	425.929	212.669
	567	20500.1	18370.2	91462.5	258577	16101.7	42466.6	21338.1													567	205.001	183.702	914.625	2585.77	161.017	424.666	213.381
	568	20656	18327.9	91463	258765	16174.2	42425.2	21326.4													568	206.56	183.279	914.63	2587.65	161.742	424.252	213.264
	569	20537.4	18343	91297.2	258528	16133	42451.8	21393.7													569	205.374	183.43	912.972	2585.28	161.33	424.518	213.937
	570	20618	18407.7	91503.4	258677	16157.5	42428.4	21384.8													570	206.18	184.077	915.034	2586.77	161.575	424.284	213.848
	571	20607.3	18383.8	91516.6	258693	16126.9	42498	21386.1													571	206.073	183.838	915.166	2586.93	161.269	424.98	213.861
	572	20605.8	18349.2	91539	259012	16115.5	42474.4	21287.8													572	206.058	183.492	915.39	2590.12	161.155	424.744	212.878
	573	20514	18402.9	91269.7	258706	16113.9	42499.3	21255.3													573	205.14	184.029	912.697	2587.06	161.139	424.993	212.553
	574	20566	18402.3	91109.7	258755	16196.2	42413.6	21305.1													574	205.66	184.023	911.097	2587.55	161.962	424.136	213.051
	575	20614	18366.5	91252.1	258711	16131.9	42573.2	21331													575	206.14	183.665	912.521	2587.11	161.319	425.732	213.31
	576	20626	18353	91277.5	258626	16105	42339.6	21402.2													576	206.26	183.53	912.775	2586.26	161.05	423.396	214.023
	577	20602.1	18405.8	91319.4	258743	16105.5	42456.2	21317.9													577	206.021	184.058	913.194	2587.43	161.055	424.562	213.179
	578	20645.5	18441.3	91226.4	258940	16118.7	42480.9	21350.6													578	206.455	184.413	912.264	2589.4	161.187	424.809	213.506
	579	20579.6	18424.7	91413.2	258856	16138.5	42427.8	21276.2													579	205.796	184.247	914.132	2588.56	161.385	424.278	212.762
	580	20576.5	18384.9	91270.2	258968	16160.5	42379.3	21371.3													580	205.765	183.849	912.702	2589.68	161.605	423.793	213.713
	581	20589.7	18437.4	91385.8	258938	16105.2	42508	21393													581	205.897	184.374	913.858	2589.38	161.052	425.08	213.93
	582	20641.9	18461.2	91279.5	258915	16123.2	42486.6	21375.7													582	206.419	184.612	912.795	2589.15	161.232	424.866	213.757
	583	20570.5	18349.4	91477.8	258900	16140.6	42580.7	21430.7													583	205.705	183.494	914.778	2589	161.406	425.807	214.307
	584	20534.4	18458.9	91178.1	258600	16127.1	42513.5	21514.5													584	205.344	184.589	911.781	2586	161.271	425.135	215.145
	585	20504.7	18425.2	91254.5	259049	16124.1	42413.4	21445													585	205.047	184.252	912.545	2590.49	161.241	424.134	214.45
	586	20596.4	18374.7	91266.3	258749	16201	42422.8	21457.9													586	205.964	183.747	912.663	2587.49	162.01	424.228	214.579
	587	20580.6	18393.6	91214.8	258966	16134.1	42400.6	21442													587	205.806	183.936	912.148	2589.66	161.341	424.006	214.42
	588	20657.9	18411	91203	258728	16140.7	42561.4	21380.8													588	206.579	184.11	912.03	2587.28	161.407	425.614	213.808
	589	20599.6	18434.4	91219.4	258838	16140.9	42555.8	21466.7													589	205.996	184.344	912.194	2588.38	161.409	425.558	214.667
	590	20618.6	18299	91257.6	259124	16128.1	42469.8	21465.9													590	206.186	182.99	912.576	2591.24	161.281	424.698	214.659
	591	20563.2	18371.5	91200.5	258971	16110.9	42484	21453.5													591	205.632	183.715	912.005	2589.71	161.109	424.84	214.535
	592	20474.7	18361.4	91034.5	259017	16171.7	42423.3	21502.1													592	204.747	183.614	910.345	2590.17	161.717	424.233	215.021
	593	20628.4	18395.9	91013.8	258830	16120.2	42466	21447.1													593	206.284	183.959	910.138	2588.3	161.202	424.66	214.471
	594	20529.2	18420.6	91201.1	258941	16104.8	42562.5	21498.6													594	205.292	184.206	912.011	2589.41	161.048	425.625	214.986
	595	20600.7	18295.8	91219.1	258879	16127.1	42416.4	21428.2													595	206.007	182.958	912.191	2588.79	161.271	424.164	214.282
	596	20644.9	18417.8	91156.6	259257	16079	42499.4	21481.1													596	206.449	184.178	911.566	2592.57	160.79	424.994	214.811
	597	20572.1	18427.4	91123.8	258978	16179.1	42363.9	21543.8													597	205.721	184.274	911.238	2589.78	161.791	423.639	215.438
	598	20528.8	18416.1	91156.1	259011	16163.4	42410.3	21547.1													598	205.288	184.161	911.561	2590.11	161.634	424.103	215.471
	599	20621.7	18393.7	90962.9	259075	16173.6	42277	21457.9													599	206.217	183.937	909.629	2590.75	161.736	422.77	214.579
	600	20574.8	18499.4	91169.3	258771	16206.2	42429.1	21545.6													600	205.748	184.994	911.693	2587.71	162.062	424.291	215.456
