# Supplementary material for: Daptomycin forms a stable complex with phosphatidylglycerol for selective uptake to bacterial membrane
Source: eLife. 2025 Jun 2;13:RP93267. doi: 10.7554/eLife.93267 (PMC12129450; doi:10.7554/eLife.93267)
Supplement: Figure 2—source data 3. [file elife-93267-fig2-data3.xlsx]

## Sheet: Multi Scans KIN
Time	Control	0.65uM	1.30uM	2.60uM	5.20uM	10.41uM	20.83uM	41.66uM	83.33uM											Time	Control	0.65uM	1.30uM	2.60uM	5.20uM	10.41uM	20.83uM	41.66uM	83.33uM
0	20200	19600	20600	25200	35300	62800	93500	203000	269000											0	202	196	206	252	353	628	935	2030	2690
1	20200	19500	20600	25300	35400	62700	93500	203000	269000											1	202	195	206	253	354	627	935	2030	2690
2	20100	19500	20600	25200	35400	62600	93500	202000	269000											2	201	195	206	252	354	626	935	2020	2690
3	20100	19600	20600	25300	35500	62500	93500	202000	269000											3	201	196	206	253	355	625	935	2020	2690
4	20200	19600	20700	25200	35600	62400	93600	202000	269000											4	202	196	207	252	356	624	936	2020	2690
5	20200	19600	20800	25300	35600	62400	93500	202000	269000											5	202	196	208	253	356	624	935	2020	2690
6	20200	19600	20700	25400	35600	62400	93600	202000	269000											6	202	196	207	254	356	624	936	2020	2690
7	20200	19600	20800	25400	35700	62300	93600	201000	269000											7	202	196	208	254	357	623	936	2010	2690
8	20400	19600	20700	25500	35700	62300	93500	201000	269000											8	204	196	207	255	357	623	935	2010	2690
9	20200	19600	20800	25500	35800	62200	93600	201000	269000											9	202	196	208	255	358	622	936	2010	2690
10	20200	19600	20800	25500	35800	62100	93600	201000	270000											10	202	196	208	255	358	621	936	2010	2700
11	20200	19500	20800	25400	35700	62000	93600	201000	270000											11	202	195	208	254	357	620	936	2010	2700
12	20200	19500	20800	25500	35800	61900	93500	201000	270000											12	202	195	208	255	358	619	935	2010	2700
13	20300	19600	20900	25500	35900	61700	93700	200000	270000											13	203	196	209	255	359	617	937	2000	2700
14	20300	19600	20800	25600	35700	61900	93700	200000	270000											14	203	196	208	256	357	619	937	2000	2700
15	20200	19600	20700	25600	35900	61800	93500	200000	270000											15	202	196	207	256	359	618	935	2000	2700
16	20300	19600	20800	25600	35900	61800	93600	200000	270000											16	203	196	208	256	359	618	936	2000	2700
17	20300	19600	20900	25600	35800	61700	93700	200000	270000											17	203	196	209	256	358	617	937	2000	2700
18	20300	19600	20900	25700	36000	61600	93500	199000	270000											18	203	196	209	257	360	616	935	1990	2700
19	20200	19600	20900	25700	36000	61600	93800	199000	270000											19	202	196	209	257	360	616	938	1990	2700
20	20300	19600	20900	25600	35900	61800	93800	199000	269000											20	203	196	209	256	359	618	938	1990	2690
21	20200	19600	20900	25800	35900	61600	93800	199000	270000											21	202	196	209	258	359	616	938	1990	2700
22	20400	19600	20900	25800	36100	61600	93700	199000	269000											22	204	196	209	258	361	616	937	1990	2690
23	20300	19600	20900	25800	35900	61500	93800	198000	270000											23	203	196	209	258	359	615	938	1980	2700
24	20300	19600	21000	25700	36000	61500	93700	199000	270000											24	203	196	210	257	360	615	937	1990	2700
25	20300	19600	21000	25900	36000	61500	93800	199000	269000											25	203	196	210	259	360	615	938	1990	2690
26	20300	19700	21000	25800	36100	61400	94000	198000	269000											26	203	197	210	258	361	614	940	1980	2690
27	20200	19600	21000	25900	36000	61300	93900	198000	269000											27	202	196	210	259	360	613	939	1980	2690
28	20300	19600	21000	25800	36100	61300	93800	198000	269000											28	203	196	210	258	361	613	938	1980	2690
29	20300	19500	21000	25800	36000	61200	93800	198000	269000											29	203	195	210	258	360	612	938	1980	2690
30	20300	19600	20900	25800	36100	61300	93800	198000	269000											30	203	196	209	258	361	613	938	1980	2690
31	20400	19700	20900	25800	36100	61300	93900	198000	269000											31	204	197	209	258	361	613	939	1980	2690				CL	F450
32	20400	19700	20900	25900	36300	61200	93900	197000	269000											32	204	197	209	259	363	612	939	1970	2690				0	206
33	20200	19700	21000	25800	36200	61200	94100	197000	269000											33	202	197	210	258	362	612	941	1970	2690				0.65	196
34	20400	19700	21000	25800	36300	61200	94100	197000	269000											34	204	197	210	258	363	612	941	1970	2690				1.3	207
35	20400	19600	20800	25900	36100	61000	94000	197000	268000											35	204	196	208	259	361	610	940	1970	2680				2.6	264
36	20300	19600	20900	25800	36200	61200	94100	197000	268000											36	203	196	209	258	362	612	941	1970	2680				5.2	357
37	20300	19700	20900	25900	36200	61000	93900	197000	269000											37	203	197	209	259	362	610	939	1970	2690				10.41	565
38	20300	19700	21000	26000	36200	61000	94100	197000	268000											38	203	197	210	260	362	610	941	1970	2680				20.83	912
39	20400	19600	21000	26000	36200	61100	93800	197000	268000											39	204	196	210	260	362	611	938	1970	2680				41.66	1720
40	20400	19600	21000	25900	36300	60900	94100	196000	268000											40	204	196	210	259	363	609	941	1960	2680				83.33	2220
41	20400	19600	21000	26000	36200	61100	94000	196000	268000											41	204	196	210	260	362	611	940	1960	2680
42	20300	19600	21000	26000	36300	61000	94300	196000	268000											42	203	196	210	260	363	610	943	1960	2680
43	20200	19500	21000	26000	36200	60800	94400	196000	268000											43	202	195	210	260	362	608	944	1960	2680
44	20300	19700	21000	26000	36200	60900	94300	196000	268000											44	203	197	210	260	362	609	943	1960	2680
45	20400	19500	21100	26000	36300	61000	94200	196000	267000											45	204	195	211	260	363	610	942	1960	2670
46	20400	19600	21000	26000	36200	60800	94100	196000	268000											46	204	196	210	260	362	608	941	1960	2680
47	20300	19600	21000	26100	36300	60900	94300	196000	267000											47	203	196	210	261	363	609	943	1960	2670
48	20300	19600	21000	26100	36300	60800	94300	196000	267000											48	203	196	210	261	363	608	943	1960	2670
49	20400	19700	21000	26100	36300	60800	94300	195000	267000											49	204	197	210	261	363	608	943	1950	2670
50	20400	19600	21100	26100	36300	60800	94400	196000	267000											50	204	196	211	261	363	608	944	1960	2670
51	20400	19600	21100	26100	36300	60800	94300	195000	267000											51	204	196	211	261	363	608	943	1950	2670
52	20400	19600	21000	26100	36400	60800	94300	195000	267000											52	204	196	210	261	364	608	943	1950	2670
53	20300	19700	21000	26100	36300	60700	94400	195000	267000											53	203	197	210	261	363	607	944	1950	2670
54	20300	19600	21000	26100	36300	60800	94400	195000	267000											54	203	196	210	261	363	608	944	1950	2670
55	20400	19700	21000	26100	36400	60600	94500	195000	267000											55	204	197	210	261	364	606	945	1950	2670
56	20400	19700	21100	26200	36300	60600	94400	195000	266000											56	204	197	211	262	363	606	944	1950	2660
57	20400	19500	21000	26100	36300	60700	94400	195000	266000											57	204	195	210	261	363	607	944	1950	2660
58	20300	19600	21000	26200	36300	60600	94600	194000	266000											58	203	196	210	262	363	606	946	1940	2660
59	20300	19600	20900	26200	36300	60600	94400	194000	266000											59	203	196	209	262	363	606	944	1940	2660
60	20400	19700	20900	26300	36300	60400	94500	194000	266000											60	204	197	209	263	363	604	945	1940	2660
61	20400	19600	21100	26100	36400	60600	94600	194000	266000											61	204	196	211	261	364	606	946	1940	2660
62	20400	19600	21000	26200	36300	60600	94400	194000	266000											62	204	196	210	262	363	606	944	1940	2660
63	20300	19600	21100	26200	36300	60500	94500	194000	266000											63	203	196	211	262	363	605	945	1940	2660
64	20400	19600	20900	26200	36300	60600	94600	194000	266000											64	204	196	209	262	363	606	946	1940	2660
65	20300	19700	21100	26200	36400	60500	94600	194000	266000											65	203	197	211	262	364	605	946	1940	2660
66	20400	19700	21000	26300	36300	60600	94700	194000	266000											66	204	197	210	263	363	606	947	1940	2660
67	20400	19700	20900	26300	36300	60300	94500	193000	266000											67	204	197	209	263	363	603	945	1930	2660
68	20400	19600	21100	26300	36400	60400	94700	194000	266000											68	204	196	211	263	364	604	947	1940	2660
69	20400	19600	21100	26300	36400	60400	94700	193000	265000											69	204	196	211	263	364	604	947	1930	2650
70	20400	19700	21000	26300	36400	60400	94600	193000	265000											70	204	197	210	263	364	604	946	1930	2650
71	20400	19600	21100	26300	36300	60400	94500	193000	265000											71	204	196	211	263	363	604	945	1930	2650
72	20400	19600	21000	26200	36300	60300	94700	193000	265000											72	204	196	210	262	363	603	947	1930	2650
73	20300	19700	21000	26200	36400	60300	94700	193000	265000											73	203	197	210	262	364	603	947	1930	2650
74	20400	19700	21000	26300	36400	60200	94800	193000	265000											74	204	197	210	263	364	602	948	1930	2650
75	20400	19700	21000	26400	36400	60400	94700	193000	265000											75	204	197	210	264	364	604	947	1930	2650
76	20400	19600	21100	26300	36400	60200	94700	193000	264000											76	204	196	211	263	364	602	947	1930	2640
77	20300	19600	21100	26300	36300	60300	94800	193000	264000											77	203	196	211	263	363	603	948	1930	2640
78	20400	19500	21000	26300	36400	60300	94800	193000	265000											78	204	195	210	263	364	603	948	1930	2650
79	20500	19600	21100	26400	36400	60200	94700	192000	265000											79	205	196	211	264	364	602	947	1920	2650
80	20500	19600	21100	26300	36400	60200	94800	192000	264000											80	205	196	211	263	364	602	948	1920	2640
81	20500	19700	21100	26400	36300	60400	94700	192000	264000											81	205	197	211	264	363	604	947	1920	2640
82	20300	19700	21200	26200	36200	60400	94600	192000	264000											82	203	197	212	262	362	604	946	1920	2640
83	20300	19700	21000	26400	36300	60300	94700	192000	264000											83	203	197	210	264	363	603	947	1920	2640
84	20300	19700	21000	26300	36300	60000	94600	192000	264000											84	203	197	210	263	363	600	946	1920	2640
85	20500	19600	21100	26400	36200	60300	94800	192000	264000											85	205	196	211	264	362	603	948	1920	2640
86	20500	19600	21100	26400	36400	60300	95100	192000	264000											86	205	196	211	264	364	603	951	1920	2640
87	20400	19600	21000	26300	36400	60200	95000	192000	264000											87	204	196	210	263	364	602	950	1920	2640
88	20400	19600	21100	26300	36200	60100	95000	191000	264000											88	204	196	211	263	362	601	950	1910	2640
89	20500	19600	21100	26300	36400	60200	95000	191000	263000											89	205	196	211	263	364	602	950	1910	2630
90	20300	19600	21100	26400	36500	60200	94900	191000	263000											90	203	196	211	264	365	602	949	1910	2630
91	20400	19600	21000	26400	36400	60000	95000	191000	263000											91	204	196	210	264	364	600	950	1910	2630
92	20500	19600	21100	26400	36300	60100	95000	191000	263000											92	205	196	211	264	363	601	950	1910	2630
93	20400	19700	21100	26300	36400	60100	95200	191000	263000											93	204	197	211	263	364	601	952	1910	2630
94	20400	19600	21100	26500	36400	60100	95000	191000	263000											94	204	196	211	265	364	601	950	1910	2630
95	20400	19600	21100	26400	36400	60000	94800	191000	263000											95	204	196	211	264	364	600	948	1910	2630
96	20400	19600	21200	26300	36300	60100	95000	191000	263000											96	204	196	212	263	363	601	950	1910	2630
97	20400	19500	21200	26400	36300	60300	95100	191000	263000											97	204	195	212	264	363	603	951	1910	2630
98	20500	19600	21100	26400	36400	60100	94800	191000	263000											98	205	196	211	264	364	601	948	1910	2630
99	20400	19700	21000	26300	36300	60100	95000	191000	263000											99	204	197	210	263	363	601	950	1910	2630
100	20400	19600	21000	26300	36500	60100	95100	191000	262000											100	204	196	210	263	365	601	951	1910	2620
101	20400	19700	21000	26400	36400	60000	95100	190000	262000											101	204	197	210	264	364	600	951	1900	2620
102	20500	19600	21100	26400	36400	60000	95200	190000	262000											102	205	196	211	264	364	600	952	1900	2620
103	20300	19700	21100	26400	36400	59900	95100	190000	262000											103	203	197	211	264	364	599	951	1900	2620
104	20500	19700	21000	26400	36500	59900	95000	190000	262000											104	205	197	210	264	365	599	950	1900	2620
105	20500	19600	21000	26500	36400	60000	95200	190000	262000											105	205	196	210	265	364	600	952	1900	2620
106	20400	19700	21000	26400	36500	60000	94900	190000	262000											106	204	197	210	264	365	600	949	1900	2620
107	20400	19600	21200	26400	36400	59800	95000	190000	262000											107	204	196	212	264	364	598	950	1900	2620
108	20400	19700	21100	26400	36400	60000	95000	190000	261000											108	204	197	211	264	364	600	950	1900	2610
109	20500	19600	21100	26500	36500	60000	95000	190000	261000											109	205	196	211	265	365	600	950	1900	2610
110	20400	19700	21100	26400	36400	59900	95100	190000	261000											110	204	197	211	264	364	599	951	1900	2610
111	20500	19600	21000	26500	36300	59900	95000	190000	261000											111	205	196	210	265	363	599	950	1900	2610
112	20500	19600	21100	26500	36300	59900	95100	189000	261000											112	205	196	211	265	363	599	951	1890	2610
113	20500	19700	21100	26500	36500	59700	95100	189000	261000											113	205	197	211	265	365	597	951	1890	2610
114	20400	19600	21000	26500	36300	59700	95100	190000	261000											114	204	196	210	265	363	597	951	1900	2610
115	20400	19700	21000	26400	36400	59800	95400	189000	261000											115	204	197	210	264	364	598	954	1890	2610
116	20400	19700	21100	26500	36500	59800	95200	189000	261000											116	204	197	211	265	365	598	952	1890	2610
117	20500	19600	21000	26400	36300	59600	94900	189000	261000											117	205	196	210	264	363	596	949	1890	2610
118	20400	19700	21000	26400	36400	59700	95200	189000	261000											118	204	197	210	264	364	597	952	1890	2610
119	20400	19700	21100	26500	36400	59800	95100	189000	261000											119	204	197	211	265	364	598	951	1890	2610
120	20400	19600	21100	26400	36400	59800	95300	189000	260000											120	204	196	211	264	364	598	953	1890	2600
121	20400	19700	21200	26400	36400	59800	95000	189000	261000											121	204	197	212	264	364	598	950	1890	2610
122	20400	19700	21000	26400	36300	59700	95100	189000	260000											122	204	197	210	264	363	597	951	1890	2600
123	20400	19700	21100	26400	36500	59600	95100	188000	260000											123	204	197	211	264	365	596	951	1880	2600
124	20400	19600	21100	26500	36400	59700	95100	188000	260000											124	204	196	211	265	364	597	951	1880	2600
125	20400	19600	21100	26400	36400	59700	95200	188000	260000											125	204	196	211	264	364	597	952	1880	2600
126	20300	19600	21200	26500	36500	59800	95200	188000	259000											126	203	196	212	265	365	598	952	1880	2590
127	20400	19600	21000	26400	36400	59600	95100	188000	260000											127	204	196	210	264	364	596	951	1880	2600
128	20400	19700	21100	26400	36400	59500	94900	188000	260000											128	204	197	211	264	364	595	949	1880	2600
129	20400	19600	21100	26500	36400	59600	95200	188000	259000											129	204	196	211	265	364	596	952	1880	2590
130	20500	19600	21200	26400	36300	59600	95100	188000	259000											130	205	196	212	264	363	596	951	1880	2590
131	20400	19700	21200	26300	36400	59600	95300	188000	259000											131	204	197	212	263	364	596	953	1880	2590
132	20400	19700	21100	26400	36300	59700	95000	188000	259000											132	204	197	211	264	363	597	950	1880	2590
133	20400	19700	21100	26500	36400	59600	95000	188000	259000											133	204	197	211	265	364	596	950	1880	2590
134	20500	19700	21100	26500	36400	59600	95100	188000	259000											134	205	197	211	265	364	596	951	1880	2590
135	20400	19600	21100	26600	36300	59600	95200	187000	259000											135	204	196	211	266	363	596	952	1870	2590
136	20400	19600	21100	26400	36300	59600	95200	187000	259000											136	204	196	211	264	363	596	952	1870	2590
137	20300	19700	21100	26400	36400	59600	95100	188000	259000											137	203	197	211	264	364	596	951	1880	2590
138	20300	19700	21100	26500	36400	59600	95100	187000	259000											138	203	197	211	265	364	596	951	1870	2590
139	20500	19700	21100	26400	36300	59600	95000	187000	258000											139	205	197	211	264	363	596	950	1870	2580
140	20400	19700	21100	26400	36400	59600	94900	187000	258000											140	204	197	211	264	364	596	949	1870	2580
141	20500	19700	21100	26500	36400	59500	95200	187000	258000											141	205	197	211	265	364	595	952	1870	2580
142	20400	19700	21200	26400	36300	59700	95300	187000	258000											142	204	197	212	264	363	597	953	1870	2580
143	20600	19600	21100	26500	36400	59500	95000	187000	258000											143	206	196	211	265	364	595	950	1870	2580
144	20400	19700	21200	26400	36200	59500	95100	187000	258000											144	204	197	212	264	362	595	951	1870	2580
145	20500	19600	21200	26500	36200	59300	95100	187000	258000											145	205	196	212	265	362	593	951	1870	2580
146	20500	19600	21200	26500	36300	59500	95000	186000	257000											146	205	196	212	265	363	595	950	1860	2570
147	20500	19700	21100	26500	36300	59400	95000	187000	258000											147	205	197	211	265	363	594	950	1870	2580
148	20400	19600	21100	26500	36300	59500	95200	187000	257000											148	204	196	211	265	363	595	952	1870	2570
149	20400	19700	21300	26400	36400	59400	95200	187000	257000											149	204	197	213	264	364	594	952	1870	2570
150	20500	19700	21100	26500	36400	59600	94900	186000	257000											150	205	197	211	265	364	596	949	1860	2570
151	20400	19700	21200	26500	36300	59400	95000	186000	257000											151	204	197	212	265	363	594	950	1860	2570
152	20500	19700	21200	26500	36400	59500	95100	186000	257000											152	205	197	212	265	364	595	951	1860	2570
153	20400	19600	21300	26500	36400	59500	95100	186000	257000											153	204	196	213	265	364	595	951	1860	2570
154	20400	19700	21200	26500	36300	59300	95100	186000	257000											154	204	197	212	265	363	593	951	1860	2570
155	20400	19600	21200	26500	36400	59400	94900	186000	257000											155	204	196	212	265	364	594	949	1860	2570
156	20500	19700	21200	26500	36400	59400	95100	186000	256000											156	205	197	212	265	364	594	951	1860	2560
157	20400	19500	21100	26400	36400	59600	95100	186000	256000											157	204	195	211	264	364	596	951	1860	2560
158	20400	19700	21200	26400	36300	59300	95300	186000	256000											158	204	197	212	264	363	593	953	1860	2560
159	20400	19700	21200	26400	36200	59200	95100	186000	256000											159	204	197	212	264	362	592	951	1860	2560
160	20300	19700	21100	26400	36300	59500	95200	186000	256000											160	203	197	211	264	363	595	952	1860	2560
161	20500	19700	21100	26500	36300	59400	95200	186000	256000											161	205	197	211	265	363	594	952	1860	2560
162	20500	19600	21200	26600	36300	59300	95300	186000	256000											162	205	196	212	266	363	593	953	1860	2560
163	20400	19700	21100	26500	36300	59200	95200	186000	256000											163	204	197	211	265	363	592	952	1860	2560
164	20500	19700	21200	26500	36400	59400	95100	186000	256000											164	205	197	212	265	364	594	951	1860	2560
165	20500	19600	21200	26400	36200	59300	95100	185000	256000											165	205	196	212	264	362	593	951	1850	2560
166	20500	19700	21300	26500	36200	59300	95100	185000	255000											166	205	197	213	265	362	593	951	1850	2550
167	20500	19600	21200	26600	36300	59400	95200	186000	255000											167	205	196	212	266	363	594	952	1860	2550
168	20400	19600	21200	26500	36300	59300	95100	185000	255000											168	204	196	212	265	363	593	951	1850	2550
169	20500	19600	21100	26500	36300	59400	95300	185000	255000											169	205	196	211	265	363	594	953	1850	2550
170	20400	19700	21200	26600	36300	59400	95100	185000	255000											170	204	197	212	266	363	594	951	1850	2550
171	20500	19800	21200	26500	36400	59300	95100	185000	255000											171	205	198	212	265	364	593	951	1850	2550
172	20400	19700	21200	26500	36200	59200	95000	185000	255000											172	204	197	212	265	362	592	950	1850	2550
173	20500	19600	21200	26600	36300	59200	95100	185000	255000											173	205	196	212	266	363	592	951	1850	2550
174	20500	19600	21200	26600	36100	59200	95100	185000	255000											174	205	196	212	266	361	592	951	1850	2550
175	20500	19600	21200	26500	36400	59100	95000	185000	254000											175	205	196	212	265	364	591	950	1850	2540
176	20500	19700	21200	26500	36300	59300	95000	185000	254000											176	205	197	212	265	363	593	950	1850	2540
177	20400	19700	21200	26700	36300	59100	95100	185000	255000											177	204	197	212	267	363	591	951	1850	2550
178	20400	19600	21200	26600	36200	59200	95000	185000	254000											178	204	196	212	266	362	592	950	1850	2540
179	20500	19700	21100	26500	36200	59000	94900	185000	254000											179	205	197	211	265	362	590	949	1850	2540
180	20600	19600	21100	26600	36300	59300	95000	185000	254000											180	206	196	211	266	363	593	950	1850	2540
181	20500	19600	21300	26600	36200	59200	94900	184000	254000											181	205	196	213	266	362	592	949	1840	2540
182	20400	19700	21200	26600	36400	59200	95000	185000	254000											182	204	197	212	266	364	592	950	1850	2540
183	20500	19600	21200	26500	36300	59200	95000	185000	253000											183	205	196	212	265	363	592	950	1850	2530
184	20500	19600	21200	26600	36200	59200	94900	184000	253000											184	205	196	212	266	362	592	949	1840	2530
185	20500	19600	21200	26500	36200	59100	95100	185000	253000											185	205	196	212	265	362	591	951	1850	2530
186	20500	19600	21200	26600	36100	59000	94900	185000	254000											186	205	196	212	266	361	590	949	1850	2540
187	20500	19600	21200	26600	36400	59100	95000	184000	253000											187	205	196	212	266	364	591	950	1840	2530
188	20600	19600	21200	26500	36200	59100	95000	184000	253000											188	206	196	212	265	362	591	950	1840	2530
189	20600	19700	21100	26600	36300	59000	94900	184000	253000											189	206	197	211	266	363	590	949	1840	2530
190	20400	19700	21200	26600	36300	59100	95000	184000	253000											190	204	197	212	266	363	591	950	1840	2530
191	20500	19600	21200	26600	36300	59100	94800	184000	253000											191	205	196	212	266	363	591	948	1840	2530
192	20500	19700	21100	26600	36300	59100	95000	184000	253000											192	205	197	211	266	363	591	950	1840	2530
193	20500	19700	21200	26600	36200	59000	95000	184000	252000											193	205	197	212	266	362	590	950	1840	2520
194	20500	19700	21100	26600	36400	59000	95100	184000	253000											194	205	197	211	266	364	590	951	1840	2530
195	20400	19700	21200	26600	36300	58900	95000	184000	252000											195	204	197	212	266	363	589	950	1840	2520
196	20400	19700	21200	26500	36300	59200	95100	184000	252000											196	204	197	212	265	363	592	951	1840	2520
197	20500	19600	21200	26600	36400	59000	94900	184000	252000											197	205	196	212	266	364	590	949	1840	2520
198	20400	19700	21200	26600	36300	59000	94900	184000	252000											198	204	197	212	266	363	590	949	1840	2520
199	20500	19700	21300	26600	36200	58800	94900	184000	252000											199	205	197	213	266	362	588	949	1840	2520
200	20400	19600	21300	26600	36300	58900	95100	184000	252000											200	204	196	213	266	363	589	951	1840	2520
201	20500	19600	21100	26600	36200	59000	94900	184000	252000											201	205	196	211	266	362	590	949	1840	2520
202	20500	19500	21100	26700	36400	58900	94900	184000	252000											202	205	195	211	267	364	589	949	1840	2520
203	20400	19700	21300	26700	36100	58900	95000	183000	252000											203	204	197	213	267	361	589	950	1830	2520
204	20500	19700	21100	26700	36300	58900	95000	183000	252000											204	205	197	211	267	363	589	950	1830	2520
205	20400	19700	21100	26600	36300	58900	95000	183000	251000											205	204	197	211	266	363	589	950	1830	2510
206	20400	19700	21200	26500	36400	58700	94800	184000	252000											206	204	197	212	265	364	587	948	1840	2520
207	20500	19600	21100	26700	36200	59000	94900	183000	251000											207	205	196	211	267	362	590	949	1830	2510
208	20500	19700	21200	26700	36200	58900	94900	183000	252000											208	205	197	212	267	362	589	949	1830	2520
209	20500	19600	21200	26700	36200	58800	94800	183000	251000											209	205	196	212	267	362	588	948	1830	2510
210	20500	19600	21200	26700	36300	58900	94800	183000	251000											210	205	196	212	267	363	589	948	1830	2510
211	20500	19700	21100	26600	36300	58900	94800	183000	251000											211	205	197	211	266	363	589	948	1830	2510
212	20400	19600	21100	26600	36300	58800	94700	183000	251000											212	204	196	211	266	363	588	947	1830	2510
213	20500	19600	21100	26600	36300	58800	94700	183000	250000											213	205	196	211	266	363	588	947	1830	2500
214	20600	19700	21100	26700	36200	58700	94900	183000	251000											214	206	197	211	267	362	587	949	1830	2510
215	20400	19600	21000	26600	36200	58800	94700	183000	250000											215	204	196	210	266	362	588	947	1830	2500
216	20500	19700	21200	26600	36200	58800	94700	183000	250000											216	205	197	212	266	362	588	947	1830	2500
217	20600	19600	21200	26800	36200	58900	94700	183000	250000											217	206	196	212	268	362	589	947	1830	2500
218	20500	19600	21200	26700	36200	58800	94700	183000	250000											218	205	196	212	267	362	588	947	1830	2500
219	20600	19700	21100	26700	36200	58800	94900	183000	250000											219	206	197	211	267	362	588	949	1830	2500
220	20500	19700	21200	26600	36300	58700	94600	183000	250000											220	205	197	212	266	363	587	946	1830	2500
221	20500	19700	21200	26700	36100	58700	94800	182000	250000											221	205	197	212	267	361	587	948	1820	2500
222	20500	19600	21300	26600	36200	59000	94600	182000	250000											222	205	196	213	266	362	590	946	1820	2500
223	20500	19600	21200	26700	36200	58800	94700	183000	250000											223	205	196	212	267	362	588	947	1830	2500
224	20500	19600	21200	26600	36100	58700	94900	183000	250000											224	205	196	212	266	361	587	949	1830	2500
225	20600	19700	21200	26600	36300	58700	94700	183000	250000											225	206	197	212	266	363	587	947	1830	2500
226	20500	19600	21200	26700	36200	58800	94600	183000	249000											226	205	196	212	267	362	588	946	1830	2490
227	20500	19600	21200	26700	36100	58700	94600	183000	250000											227	205	196	212	267	361	587	946	1830	2500
228	20400	19600	21300	26600	36200	58600	94500	183000	249000											228	204	196	213	266	362	586	945	1830	2490
229	20500	19600	21200	26700	36200	58700	94700	182000	249000											229	205	196	212	267	362	587	947	1820	2490
230	20500	19700	21200	26700	36300	58500	94500	182000	249000											230	205	197	212	267	363	585	945	1820	2490
231	20500	19700	21200	26700	36100	58700	94700	182000	249000											231	205	197	212	267	361	587	947	1820	2490
232	20500	19700	21200	26600	36200	58800	94600	182000	249000											232	205	197	212	266	362	588	946	1820	2490
233	20500	19700	21100	26600	36300	58700	94500	182000	249000											233	205	197	211	266	363	587	945	1820	2490
234	20500	19700	21200	26700	36300	58600	94700	182000	249000											234	205	197	212	267	363	586	947	1820	2490
235	20500	19500	21200	26700	36200	58800	94700	182000	249000											235	205	195	212	267	362	588	947	1820	2490
236	20500	19500	21200	26700	36200	58700	94400	182000	249000											236	205	195	212	267	362	587	944	1820	2490
237	20500	19600	21200	26600	36200	58700	94600	182000	248000											237	205	196	212	266	362	587	946	1820	2480
238	20500	19600	21200	26600	36200	58700	94600	182000	249000											238	205	196	212	266	362	587	946	1820	2490
239	20500	19700	21000	26700	36200	58600	94300	182000	248000											239	205	197	210	267	362	586	943	1820	2480
240	20500	19600	21200	26700	36300	58600	94600	182000	248000											240	205	196	212	267	363	586	946	1820	2480
241	20500	19700	21300	26600	36200	58800	94500	182000	248000											241	205	197	213	266	362	588	945	1820	2480
242	20500	19700	21100	26800	36200	58600	94500	182000	248000											242	205	197	211	268	362	586	945	1820	2480
243	20600	19500	21200	26600	36100	58800	94700	182000	248000											243	206	195	212	266	361	588	947	1820	2480
244	20500	19600	21100	26700	36200	58400	94400	182000	248000											244	205	196	211	267	362	584	944	1820	2480
245	20400	19700	21100	26700	36200	58600	94400	182000	248000											245	204	197	211	267	362	586	944	1820	2480
246	20400	19600	21100	26600	36100	58500	94400	182000	248000											246	204	196	211	266	361	585	944	1820	2480
247	20500	19600	21200	26700	36100	58600	94300	182000	248000											247	205	196	212	267	361	586	943	1820	2480
248	20500	19500	21100	26700	36200	58600	94500	181000	248000											248	205	195	211	267	362	586	945	1810	2480
249	20500	19700	21200	26600	36200	58600	94500	181000	248000											249	205	197	212	266	362	586	945	1810	2480
250	20400	19700	21000	26800	36200	58600	94400	182000	247000											250	204	197	210	268	362	586	944	1820	2470
251	20600	19500	21000	26700	36100	58500	94500	182000	247000											251	206	195	210	267	361	585	945	1820	2470
252	20500	19600	21100	26700	36300	58600	94500	182000	247000											252	205	196	211	267	363	586	945	1820	2470
253	20600	19600	21100	26700	36300	58500	94500	181000	247000											253	206	196	211	267	363	585	945	1810	2470
254	20600	19500	21100	26700	36100	58500	94400	181000	247000											254	206	195	211	267	361	585	944	1810	2470
255	20500	19600	21100	26600	36100	58600	94100	181000	247000											255	205	196	211	266	361	586	941	1810	2470
256	20500	19700	21200	26700	36200	58500	94200	181000	247000											256	205	197	212	267	362	585	942	1810	2470
257	20600	19700	21100	26700	36200	58600	94300	181000	247000											257	206	197	211	267	362	586	943	1810	2470
258	20500	19600	21100	26800	36100	58500	94300	181000	247000											258	205	196	211	268	361	585	943	1810	2470
259	20500	19600	21200	26600	36200	58400	94300	181000	246000											259	205	196	212	266	362	584	943	1810	2460
260	20500	19700	21100	26700	36200	58500	94300	181000	246000											260	205	197	211	267	362	585	943	1810	2460
261	20600	19600	21100	26700	36100	58600	94200	181000	246000											261	206	196	211	267	361	586	942	1810	2460
262	20600	19600	21000	26700	36200	58300	94400	181000	246000											262	206	196	210	267	362	583	944	1810	2460
263	20500	19700	21100	26600	36300	58400	94200	181000	246000											263	205	197	211	266	363	584	942	1810	2460
264	20500	19700	21100	26700	36400	58400	94100	181000	246000											264	205	197	211	267	364	584	941	1810	2460
265	20600	19600	21100	26700	36000	58400	94100	181000	246000											265	206	196	211	267	360	584	941	1810	2460
266	20600	19600	21100	26700	36100	58400	94100	181000	246000											266	206	196	211	267	361	584	941	1810	2460
267	20600	19600	21200	26700	36300	58200	94200	181000	246000											267	206	196	212	267	363	582	942	1810	2460
268	20500	19600	21100	26700	36200	58600	94100	181000	246000											268	205	196	211	267	362	586	941	1810	2460
269	20600	19700	21000	26800	36200	58300	94100	181000	246000											269	206	197	210	268	362	583	941	1810	2460
270	20600	19600	21100	26700	36100	58400	94000	181000	246000											270	206	196	211	267	361	584	940	1810	2460
271	20500	19600	21100	26700	36100	58500	94200	181000	245000											271	205	196	211	267	361	585	942	1810	2450
272	20600	19700	21100	26700	36100	58400	94100	181000	246000											272	206	197	211	267	361	584	941	1810	2460
273	20500	19600	21100	26800	36200	58400	94100	181000	245000											273	205	196	211	268	362	584	941	1810	2450
274	20600	19700	21000	26700	36200	58300	94100	181000	245000											274	206	197	210	267	362	583	941	1810	2450
275	20500	19600	21000	26700	36000	58500	93900	181000	245000											275	205	196	210	267	360	585	939	1810	2450
276	20600	19600	21100	26700	36100	58200	93900	181000	245000											276	206	196	211	267	361	582	939	1810	2450
277	20500	19600	21100	26700	36000	58300	94100	181000	245000											277	205	196	211	267	360	583	941	1810	2450
278	20600	19600	21100	26700	36200	58400	94100	181000	245000											278	206	196	211	267	362	584	941	1810	2450
279	20500	19600	21100	26800	36100	58200	93900	181000	245000											279	205	196	211	268	361	582	939	1810	2450
280	20500	19700	21000	26800	36000	58300	94200	180000	245000											280	205	197	210	268	360	583	942	1800	2450
281	20600	19600	21100	26700	36000	58200	94000	180000	245000											281	206	196	211	267	360	582	940	1800	2450
282	20500	19600	21100	26700	36100	58300	94000	181000	245000											282	205	196	211	267	361	583	940	1810	2450
283	20600	19600	21200	26800	36200	58400	94000	181000	244000											283	206	196	212	268	362	584	940	1810	2440
284	20500	19700	21000	26700	36000	58300	94000	180000	245000											284	205	197	210	267	360	583	940	1800	2450
285	20500	19600	21100	26700	36000	58200	93900	180000	244000											285	205	196	211	267	360	582	939	1800	2440
286	20600	19600	21200	26600	36100	58300	94000	180000	244000											286	206	196	212	266	361	583	940	1800	2440
287	20600	19600	21100	26700	36000	58200	93900	180000	244000											287	206	196	211	267	360	582	939	1800	2440
288	20500	19600	21100	26600	36100	58300	93900	180000	244000											288	205	196	211	266	361	583	939	1800	2440
289	20500	19700	21200	26700	36100	58300	93900	180000	244000											289	205	197	212	267	361	583	939	1800	2440
290	20500	19600	21000	26600	36100	58300	93900	180000	244000											290	205	196	210	266	361	583	939	1800	2440
291	20500	19600	21000	26700	36300	58400	93900	180000	244000											291	205	196	210	267	363	584	939	1800	2440
292	20600	19600	21000	26600	36000	58200	94000	180000	243000											292	206	196	210	266	360	582	940	1800	2430
293	20500	19700	21000	26700	36100	58200	93700	180000	244000											293	205	197	210	267	361	582	937	1800	2440
294	20600	19700	21100	26700	36100	58200	93900	180000	244000											294	206	197	211	267	361	582	939	1800	2440
295	20600	19700	21100	26600	36100	58200	93900	180000	243000											295	206	197	211	266	361	582	939	1800	2430
296	20500	19700	21100	26600	36000	58300	93800	180000	243000											296	205	197	211	266	360	583	938	1800	2430
297	20600	19600	21000	26700	36000	58200	93600	180000	243000											297	206	196	210	267	360	582	936	1800	2430
298	20600	19600	21000	26700	36100	58200	93700	180000	243000											298	206	196	210	267	361	582	937	1800	2430
299	20500	19600	21100	26700	36100	58400	93800	180000	243000											299	205	196	211	267	361	584	938	1800	2430
300	20600	19600	21000	26600	36100	58200	93800	180000	243000											300	206	196	210	266	361	582	938	1800	2430
301	20600	19600	21100	26700	36100	58200	93900	180000	243000											301	206	196	211	267	361	582	939	1800	2430
302	20600	19700	21100	26700	36100	58200	93800	180000	243000											302	206	197	211	267	361	582	938	1800	2430
303	20600	19600	21000	26600	36000	58100	93800	180000	243000											303	206	196	210	266	360	581	938	1800	2430
304	20600	19700	21000	26600	36200	58100	93700	180000	243000											304	206	197	210	266	362	581	937	1800	2430
305	20500	19700	21000	26700	36100	58200	93700	180000	243000											305	205	197	210	267	361	582	937	1800	2430
306	20500	19600	21100	26700	36100	58200	93600	180000	243000											306	205	196	211	267	361	582	936	1800	2430
307	20600	19600	20900	26700	36100	58300	93700	180000	242000											307	206	196	209	267	361	583	937	1800	2420
308	20500	19700	21000	26600	36100	58300	93700	180000	242000											308	205	197	210	266	361	583	937	1800	2420
309	20500	19600	21100	26600	36100	58100	93700	180000	242000											309	205	196	211	266	361	581	937	1800	2420
310	20500	19600	21100	26600	36000	58100	93700	180000	242000											310	205	196	211	266	360	581	937	1800	2420
311	20600	19600	20900	26500	36000	58000	93500	180000	242000											311	206	196	209	265	360	580	935	1800	2420
312	20500	19600	21000	26800	36000	58100	93700	180000	242000											312	205	196	210	268	360	581	937	1800	2420
313	20500	19700	21000	26800	36100	58200	93700	179000	242000											313	205	197	210	268	361	582	937	1790	2420
314	20600	19600	21000	26600	36000	58000	93400	180000	242000											314	206	196	210	266	360	580	934	1800	2420
315	20500	19700	21000	26800	36000	58200	93500	179000	242000											315	205	197	210	268	360	582	935	1790	2420
316	20600	19600	21000	26600	36000	57900	93700	180000	241000											316	206	196	210	266	360	579	937	1800	2410
317	20600	19600	21000	26600	36100	58000	93400	179000	241000											317	206	196	210	266	361	580	934	1790	2410
318	20600	19600	21000	26700	35900	58100	93600	179000	241000											318	206	196	210	267	359	581	936	1790	2410
319	20500	19600	21000	26700	36000	58000	93500	179000	241000											319	205	196	210	267	360	580	935	1790	2410
320	20600	19700	21000	26600	36000	58000	93400	179000	241000											320	206	197	210	266	360	580	934	1790	2410
321	20500	19600	21000	26600	36000	58200	93600	179000	241000											321	205	196	210	266	360	582	936	1790	2410
322	20500	19600	21100	26600	36100	57900	93700	180000	241000											322	205	196	211	266	361	579	937	1800	2410
323	20600	19700	21000	26700	36000	58100	93400	179000	241000											323	206	197	210	267	360	581	934	1790	2410
324	20500	19700	21000	26700	36000	58000	93500	179000	241000											324	205	197	210	267	360	580	935	1790	2410
325	20500	19600	21000	26600	36000	58000	93400	179000	241000											325	205	196	210	266	360	580	934	1790	2410
326	20700	19600	21000	26600	36000	58200	93500	179000	241000											326	207	196	210	266	360	582	935	1790	2410
327	20600	19600	21000	26600	36000	57800	93500	179000	240000											327	206	196	210	266	360	578	935	1790	2400
328	20600	19600	21000	26700	35900	58100	93700	179000	241000											328	206	196	210	267	359	581	937	1790	2410
329	20500	19700	21000	26700	36200	58000	93700	179000	240000											329	205	197	210	267	362	580	937	1790	2400
330	20600	19600	21000	26800	36100	57900	93400	179000	240000											330	206	196	210	268	361	579	934	1790	2400
331	20600	19700	21000	26600	36100	57900	93400	179000	240000											331	206	197	210	266	361	579	934	1790	2400
332	20500	19600	21000	26700	36100	57800	93400	179000	241000											332	205	196	210	267	361	578	934	1790	2410
333	20600	19600	20900	26700	36000	58000	93400	179000	240000											333	206	196	209	267	360	580	934	1790	2400
334	20600	19600	21000	26700	36100	57900	93300	179000	240000											334	206	196	210	267	361	579	933	1790	2400
335	20600	19600	21000	26700	36100	58000	93500	179000	240000											335	206	196	210	267	361	580	935	1790	2400
336	20500	19700	21000	26700	36000	58000	93200	179000	240000											336	205	197	210	267	360	580	932	1790	2400
337	20600	19600	21000	26600	36000	58100	93400	179000	240000											337	206	196	210	266	360	581	934	1790	2400
338	20500	19600	21000	26600	36000	57900	93300	179000	240000											338	205	196	210	266	360	579	933	1790	2400
339	20500	19500	20900	26700	36000	57800	93300	179000	240000											339	205	195	209	267	360	578	933	1790	2400
340	20500	19600	21000	26600	36000	57800	93300	179000	240000											340	205	196	210	266	360	578	933	1790	2400
341	20600	19600	21000	26600	36100	57900	93400	179000	239000											341	206	196	210	266	361	579	934	1790	2390
342	20600	19600	20900	26500	36100	58000	93500	179000	240000											342	206	196	209	265	361	580	935	1790	2400
343	20500	19600	20800	26700	36000	58000	93400	179000	239000											343	205	196	208	267	360	580	934	1790	2390
344	20500	19600	20800	26600	36000	57900	93400	179000	239000											344	205	196	208	266	360	579	934	1790	2390
345	20500	19600	21000	26600	35900	57900	93500	179000	239000											345	205	196	210	266	359	579	935	1790	2390
346	20600	19700	20900	26600	36000	57900	93300	179000	239000											346	206	197	209	266	360	579	933	1790	2390
347	20500	19600	21000	26600	35900	57800	93300	179000	239000											347	205	196	210	266	359	578	933	1790	2390
348	20600	19600	21000	26600	36000	57900	93300	179000	239000											348	206	196	210	266	360	579	933	1790	2390
349	20600	19600	20900	26500	36000	57900	93300	179000	239000											349	206	196	209	265	360	579	933	1790	2390
350	20500	19700	21000	26500	35900	57800	93300	179000	239000											350	205	197	210	265	359	578	933	1790	2390
351	20600	19600	20900	26700	36000	57900	93300	178000	239000											351	206	196	209	267	360	579	933	1780	2390
352	20500	19600	20900	26500	35900	57700	93200	178000	238000											352	205	196	209	265	359	577	932	1780	2380
353	20600	19500	21000	26600	36000	57900	93200	178000	238000											353	206	195	210	266	360	579	932	1780	2380
354	20600	19700	20900	26700	35900	57800	93200	178000	238000											354	206	197	209	267	359	578	932	1780	2380
355	20600	19600	21000	26500	36000	57700	93200	178000	238000											355	206	196	210	265	360	577	932	1780	2380
356	20600	19600	20900	26600	35900	57900	93300	178000	238000											356	206	196	209	266	359	579	933	1780	2380
357	20500	19500	20900	26700	35900	57900	93200	178000	238000											357	205	195	209	267	359	579	932	1780	2380
358	20500	19500	20800	26700	35900	57700	93200	178000	238000											358	205	195	208	267	359	577	932	1780	2380
359	20500	19600	20900	26600	36000	57900	93200	178000	238000											359	205	196	209	266	360	579	932	1780	2380
360	20500	19600	21000	26600	35900	57800	93300	179000	238000											360	205	196	210	266	359	578	933	1790	2380
361	20600	19600	20900	26500	36000	57900	93200	178000	238000											361	206	196	209	265	360	579	932	1780	2380
362	20600	19600	21000	26600	36000	57800	93200	179000	237000											362	206	196	210	266	360	578	932	1790	2370
363	20600	19600	20900	26700	36000	57700	93300	178000	238000											363	206	196	209	267	360	577	933	1780	2380
364	20600	19600	20900	26700	35900	57800	93200	178000	238000											364	206	196	209	267	359	578	932	1780	2380
365	20600	19600	21000	26600	35900	57800	93000	178000	237000											365	206	196	210	266	359	578	930	1780	2370
366	20500	19600	21000	26600	35900	57800	93000	178000	238000											366	205	196	210	266	359	578	930	1780	2380
367	20600	19600	20900	26600	36000	57700	93300	178000	238000											367	206	196	209	266	360	577	933	1780	2380
368	20600	19500	20900	26600	36000	57800	93100	178000	237000											368	206	195	209	266	360	578	931	1780	2370
369	20500	19600	20800	26600	35900	57800	93200	178000	237000											369	205	196	208	266	359	578	932	1780	2370
370	20600	19500	20900	26600	36000	57800	93100	178000	237000											370	206	195	209	266	360	578	931	1780	2370
371	20600	19600	20900	26600	35800	57900	93100	178000	237000											371	206	196	209	266	358	579	931	1780	2370
372	20500	19600	20900	26600	35900	57600	93100	178000	237000											372	205	196	209	266	359	576	931	1780	2370
373	20600	19600	20800	26600	35800	57700	93100	178000	237000											373	206	196	208	266	358	577	931	1780	2370
374	20400	19600	20900	26600	36000	57600	92900	178000	237000											374	204	196	209	266	360	576	929	1780	2370
375	20500	19600	20900	26600	35900	57800	93000	178000	237000											375	205	196	209	266	359	578	930	1780	2370
376	20600	19600	21000	26600	35900	57800	93100	178000	237000											376	206	196	210	266	359	578	931	1780	2370
377	20500	19600	20800	26600	36000	57800	93100	178000	237000											377	205	196	208	266	360	578	931	1780	2370
378	20600	19600	20800	26500	35900	57600	92900	178000	237000											378	206	196	208	265	359	576	929	1780	2370
379	20500	19600	20800	26600	35800	57800	93000	178000	236000											379	205	196	208	266	358	578	930	1780	2360
380	20500	19500	20800	26500	36000	57600	92800	178000	236000											380	205	195	208	265	360	576	928	1780	2360
381	20600	19600	20800	26700	36000	57700	92900	178000	237000											381	206	196	208	267	360	577	929	1780	2370
382	20600	19700	20800	26500	35900	57700	92900	178000	236000											382	206	197	208	265	359	577	929	1780	2360
383	20600	19600	20800	26600	36000	57700	92700	177000	236000											383	206	196	208	266	360	577	927	1770	2360
384	20600	19500	20800	26500	35900	57700	93000	178000	236000											384	206	195	208	265	359	577	930	1780	2360
385	20600	19500	20800	26500	35800	57600	92900	178000	236000											385	206	195	208	265	358	576	929	1780	2360
386	20600	19500	20800	26700	36000	57700	92900	178000	236000											386	206	195	208	267	360	577	929	1780	2360
387	20600	19500	20900	26600	35900	57800	92900	178000	236000											387	206	195	209	266	359	578	929	1780	2360
388	20600	19600	20800	26500	35900	57600	93100	178000	236000											388	206	196	208	265	359	576	931	1780	2360
389	20600	19700	20900	26500	36000	57700	92900	178000	236000											389	206	197	209	265	360	577	929	1780	2360
390	20500	19600	20800	26500	35900	57600	93000	177000	236000											390	205	196	208	265	359	576	930	1770	2360
391	20500	19700	20800	26600	36000	57600	92900	177000	236000											391	205	197	208	266	360	576	929	1770	2360
392	20500	19700	20900	26400	35800	57600	92800	177000	235000											392	205	197	209	264	358	576	928	1770	2350
393	20500	19600	20800	26500	36000	57800	92800	177000	236000											393	205	196	208	265	360	578	928	1770	2360
394	20600	19500	20900	26600	35900	57500	92900	177000	235000											394	206	195	209	266	359	575	929	1770	2350
395	20600	19600	20800	26500	36000	57500	92900	177000	235000											395	206	196	208	265	360	575	929	1770	2350
396	20600	19500	20800	26500	35900	57600	92700	177000	235000											396	206	195	208	265	359	576	927	1770	2350
397	20600	19600	20700	26600	35900	57300	93000	177000	235000											397	206	196	207	266	359	573	930	1770	2350
398	20500	19600	20900	26700	35800	57600	92800	177000	235000											398	205	196	209	267	358	576	928	1770	2350
399	20600	19600	20900	26500	36000	57700	93000	177000	235000											399	206	196	209	265	360	577	930	1770	2350
400	20600	19600	20700	26500	35800	57700	92700	177000	235000											400	206	196	207	265	358	577	927	1770	2350
401	20500	19600	20800	26600	35800	57500	92800	177000	235000											401	205	196	208	266	358	575	928	1770	2350
402	20500	19500	20700	26400	35800	57500	92800	177000	235000											402	205	195	207	264	358	575	928	1770	2350
403	20500	19600	20800	26500	35900	57600	93000	177000	235000											403	205	196	208	265	359	576	930	1770	2350
404	20700	19600	20800	26500	35800	57500	92900	177000	235000											404	207	196	208	265	358	575	929	1770	2350
405	20700	19600	20900	26500	35800	57500	92800	177000	235000											405	207	196	209	265	358	575	928	1770	2350
406	20500	19600	20900	26600	35900	57500	92700	177000	234000											406	205	196	209	266	359	575	927	1770	2340
407	20600	19600	20800	26400	35900	57400	92900	177000	234000											407	206	196	208	264	359	574	929	1770	2340
408	20700	19600	20800	26400	35800	57500	92700	177000	234000											408	207	196	208	264	358	575	927	1770	2340
409	20700	19600	20800	26400	35800	57600	92800	177000	234000											409	207	196	208	264	358	576	928	1770	2340
410	20500	19600	20800	26600	35800	57600	92800	177000	234000											410	205	196	208	266	358	576	928	1770	2340
411	20600	19500	20800	26600	35900	57500	92700	177000	234000											411	206	195	208	266	359	575	927	1770	2340
412	20600	19600	20900	26500	35900	57400	92600	177000	234000											412	206	196	209	265	359	574	926	1770	2340
413	20500	19600	20800	26400	35900	57500	92900	177000	234000											413	205	196	208	264	359	575	929	1770	2340
414	20500	19600	20800	26500	35900	57300	92600	177000	234000											414	205	196	208	265	359	573	926	1770	2340
415	20600	19700	20900	26600	35900	57400	92800	177000	234000											415	206	197	209	266	359	574	928	1770	2340
416	20500	19500	20800	26600	35900	57600	92700	177000	234000											416	205	195	208	266	359	576	927	1770	2340
417	20500	19600	20800	26500	35800	57500	92800	177000	234000											417	205	196	208	265	358	575	928	1770	2340
418	20600	19600	20800	26500	36000	57600	92500	177000	234000											418	206	196	208	265	360	576	925	1770	2340
419	20500	19600	20800	26500	35800	57600	92500	177000	234000											419	205	196	208	265	358	576	925	1770	2340
420	20600	19500	20800	26500	35900	57600	92700	177000	234000											420	206	195	208	265	359	576	927	1770	2340
421	20600	19600	20800	26500	35900	57500	92700	176000	234000											421	206	196	208	265	359	575	927	1760	2340
422	20600	19600	20800	26600	35900	57500	92700	177000	234000											422	206	196	208	266	359	575	927	1770	2340
423	20600	19500	20900	26500	35900	57500	92700	176000	233000											423	206	195	209	265	359	575	927	1760	2330
424	20600	19700	20800	26500	35900	57600	92800	176000	233000											424	206	197	208	265	359	576	928	1760	2330
425	20600	19500	20900	26600	35900	57500	92600	176000	233000											425	206	195	209	266	359	575	926	1760	2330
426	20600	19600	20700	26500	35800	57300	92600	176000	233000											426	206	196	207	265	358	573	926	1760	2330
427	20600	19600	20800	26400	35800	57500	92600	176000	233000											427	206	196	208	264	358	575	926	1760	2330
428	20600	19600	20800	26400	35800	57400	92700	176000	233000											428	206	196	208	264	358	574	927	1760	2330
429	20600	19600	20800	26400	35800	57300	92400	176000	233000											429	206	196	208	264	358	573	924	1760	2330
430	20500	19500	20800	26500	35800	57400	92600	176000	233000											430	205	195	208	265	358	574	926	1760	2330
431	20500	19600	20700	26500	35700	57500	92500	176000	233000											431	205	196	207	265	357	575	925	1760	2330
432	20600	19600	20900	26600	35900	57400	92200	176000	233000											432	206	196	209	266	359	574	922	1760	2330
433	20600	19500	20800	26400	35700	57400	92600	176000	233000											433	206	195	208	264	357	574	926	1760	2330
434	20700	19600	20800	26400	35900	57400	92400	176000	233000											434	207	196	208	264	359	574	924	1760	2330
435	20700	19600	20700	26600	35900	57400	92700	176000	233000											435	207	196	207	266	359	574	927	1760	2330
436	20600	19600	20800	26500	35900	57400	92700	176000	233000											436	206	196	208	265	359	574	927	1760	2330
437	20700	19600	20800	26500	35700	57600	92600	176000	232000											437	207	196	208	265	357	576	926	1760	2320
438	20600	19700	20800	26500	35700	57500	92500	176000	232000											438	206	197	208	265	357	575	925	1760	2320
439	20600	19600	20800	26500	35900	57600	92400	176000	232000											439	206	196	208	265	359	576	924	1760	2320
440	20500	19500	20800	26500	35900	57200	92300	176000	232000											440	205	195	208	265	359	572	923	1760	2320
441	20600	19500	20900	26500	35900	57300	92500	176000	232000											441	206	195	209	265	359	573	925	1760	2320
442	20600	19600	20800	26500	35700	57500	92400	176000	232000											442	206	196	208	265	357	575	924	1760	2320
443	20500	19500	20800	26500	35700	57200	92600	176000	232000											443	205	195	208	265	357	572	926	1760	2320
444	20700	19500	20800	26400	35800	57400	92300	176000	232000											444	207	195	208	264	358	574	923	1760	2320
445	20600	19600	20700	26500	35700	57300	92700	176000	232000											445	206	196	207	265	357	573	927	1760	2320
446	20700	19500	20900	26500	35700	57300	92600	176000	232000											446	207	195	209	265	357	573	926	1760	2320
447	20600	19700	20800	26500	35900	57400	92400	176000	232000											447	206	197	208	265	359	574	924	1760	2320
448	20600	19600	20900	26400	35800	57400	92400	176000	231000											448	206	196	209	264	358	574	924	1760	2310
449	20600	19500	20800	26500	35900	57200	92500	176000	231000											449	206	195	208	265	359	572	925	1760	2310
450	20500	19500	20800	26500	35900	57300	92500	176000	232000											450	205	195	208	265	359	573	925	1760	2320
451	20600	19600	20800	26500	35800	57500	92300	176000	231000											451	206	196	208	265	358	575	923	1760	2310
452	20500	19600	20800	26500	35800	57300	92400	176000	231000											452	205	196	208	265	358	573	924	1760	2310
453	20500	19600	20800	26500	35800	57200	92400	176000	231000											453	205	196	208	265	358	572	924	1760	2310
454	20600	19600	20800	26500	35800	57100	92400	176000	231000											454	206	196	208	265	358	571	924	1760	2310
455	20600	19600	20800	26600	35800	57200	92300	176000	231000											455	206	196	208	266	358	572	923	1760	2310
456	20600	19600	20700	26400	35800	57200	92200	176000	231000											456	206	196	207	264	358	572	922	1760	2310
457	20600	19500	20700	26500	35800	57300	92400	175000	231000											457	206	195	207	265	358	573	924	1750	2310
458	20500	19600	20800	26500	35900	57200	92200	175000	231000											458	205	196	208	265	359	572	922	1750	2310
459	20500	19600	20700	26500	35700	57400	92400	176000	231000											459	205	196	207	265	357	574	924	1760	2310
460	20600	19500	20700	26500	35900	57200	92400	176000	231000											460	206	195	207	265	359	572	924	1760	2310
461	20600	19600	20700	26500	35800	57100	92300	175000	231000											461	206	196	207	265	358	571	923	1750	2310
462	20500	19600	20800	26500	35800	57200	92300	175000	230000											462	205	196	208	265	358	572	923	1750	2300
463	20600	19600	20800	26600	35700	57100	92300	175000	230000											463	206	196	208	266	357	571	923	1750	2300
464	20500	19500	20800	26500	35700	57100	92300	175000	231000											464	205	195	208	265	357	571	923	1750	2310
465	20600	19500	20800	26500	35800	57000	92400	175000	231000											465	206	195	208	265	358	570	924	1750	2310
466	20600	19600	20700	26400	35800	57200	92200	175000	230000											466	206	196	207	264	358	572	922	1750	2300
467	20500	19500	20800	26500	35800	57300	92300	175000	230000											467	205	195	208	265	358	573	923	1750	2300
468	20600	19600	20800	26600	35800	57300	92300	175000	231000											468	206	196	208	266	358	573	923	1750	2310
469	20600	19500	20700	26500	35800	57100	92300	175000	230000											469	206	195	207	265	358	571	923	1750	2300
470	20600	19600	20800	26500	35800	57200	92200	175000	230000											470	206	196	208	265	358	572	922	1750	2300
471	20600	19600	20700	26500	35800	57100	92200	175000	230000											471	206	196	207	265	358	571	922	1750	2300
472	20600	19600	20800	26500	35800	57300	92000	175000	230000											472	206	196	208	265	358	573	920	1750	2300
473	20600	19600	20800	26500	35700	57200	92200	175000	230000											473	206	196	208	265	357	572	922	1750	2300
474	20500	19600	20700	26400	35800	57000	92100	175000	230000											474	205	196	207	264	358	570	921	1750	2300
475	20600	19600	20700	26400	35900	57000	92200	175000	230000											475	206	196	207	264	359	570	922	1750	2300
476	20500	19600	20800	26500	35800	57200	92200	175000	230000											476	205	196	208	265	358	572	922	1750	2300
477	20700	19500	20800	26500	35800	57000	92200	175000	230000											477	207	195	208	265	358	570	922	1750	2300
478	20500	19500	20600	26400	35800	57100	92200	175000	230000											478	205	195	206	264	358	571	922	1750	2300
479	20600	19500	20700	26400	35800	57200	92200	175000	230000											479	206	195	207	264	358	572	922	1750	2300
480	20600	19600	20800	26400	35800	57000	91900	175000	230000											480	206	196	208	264	358	570	919	1750	2300
481	20600	19500	20700	26500	35800	57200	92300	175000	230000											481	206	195	207	265	358	572	923	1750	2300
482	20600	19500	20800	26500	35800	57100	92100	175000	229000											482	206	195	208	265	358	571	921	1750	2290
483	20600	19600	20700	26500	35700	57200	92300	175000	229000											483	206	196	207	265	357	572	923	1750	2290
484	20600	19600	20800	26300	35900	57100	92400	175000	229000											484	206	196	208	263	359	571	924	1750	2290
485	20600	19600	20700	26600	35600	57100	92300	175000	229000											485	206	196	207	266	356	571	923	1750	2290
486	20600	19600	20700	26500	35900	57200	92100	175000	229000											486	206	196	207	265	359	572	921	1750	2290
487	20600	19600	20700	26500	35800	57200	92100	175000	229000											487	206	196	207	265	358	572	921	1750	2290
488	20600	19600	20800	26500	35700	57000	92100	175000	229000											488	206	196	208	265	357	570	921	1750	2290
489	20500	19600	20800	26500	35800	57000	92000	175000	229000											489	205	196	208	265	358	570	920	1750	2290
490	20600	19600	20800	26500	35700	57200	92400	174000	229000											490	206	196	208	265	357	572	924	1740	2290
491	20500	19600	20700	26500	35800	57000	92300	175000	229000											491	205	196	207	265	358	570	923	1750	2290
492	20600	19600	20700	26600	35600	57000	92300	175000	229000											492	206	196	207	266	356	570	923	1750	2290
493	20600	19500	20700	26500	35700	56900	92100	175000	229000											493	206	195	207	265	357	569	921	1750	2290
494	20500	19600	20800	26500	35800	57000	92100	174000	229000											494	205	196	208	265	358	570	921	1740	2290
495	20600	19500	20700	26500	35700	57000	92100	175000	229000											495	206	195	207	265	357	570	921	1750	2290
496	20600	19500	20700	26600	35700	57000	92100	174000	229000											496	206	195	207	266	357	570	921	1740	2290
497	20600	19500	20700	26500	35800	57100	92100	174000	228000											497	206	195	207	265	358	571	921	1740	2280
498	20500	19600	20800	26400	35800	57100	92100	174000	228000											498	205	196	208	264	358	571	921	1740	2280
499	20600	19600	20700	26500	35800	57000	92000	174000	228000											499	206	196	207	265	358	570	920	1740	2280
500	20600	19500	20800	26500	35800	57000	91800	175000	228000											500	206	195	208	265	358	570	918	1750	2280
501	20500	19500	20700	26300	35700	57000	91900	175000	228000											501	205	195	207	263	357	570	919	1750	2280
502	20600	19600	20700	26500	35700	57000	92100	174000	228000											502	206	196	207	265	357	570	921	1740	2280
503	20600	19600	20700	26500	35700	57100	92000	174000	228000											503	206	196	207	265	357	571	920	1740	2280
504	20500	19600	20800	26500	35800	57000	92100	174000	228000											504	205	196	208	265	358	570	921	1740	2280
505	20600	19500	20800	26600	35800	57100	92100	174000	228000											505	206	195	208	266	358	571	921	1740	2280
506	20600	19600	20800	26500	35700	57100	92100	174000	228000											506	206	196	208	265	357	571	921	1740	2280
507	20500	19600	20800	26500	35800	56900	92000	174000	228000											507	205	196	208	265	358	569	920	1740	2280
508	20600	19600	20600	26400	35700	57000	91800	174000	228000											508	206	196	206	264	357	570	918	1740	2280
509	20600	19500	20800	26400	35700	57000	92100	174000	228000											509	206	195	208	264	357	570	921	1740	2280
510	20600	19500	20700	26600	35700	56900	91900	174000	228000											510	206	195	207	266	357	569	919	1740	2280
511	20600	19600	20800	26600	35700	57000	91800	174000	228000											511	206	196	208	266	357	570	918	1740	2280
512	20600	19500	20800	26500	35700	57000	91900	174000	227000											512	206	195	208	265	357	570	919	1740	2270
513	20600	19500	20700	26500	35800	57000	91900	174000	227000											513	206	195	207	265	358	570	919	1740	2270
514	20600	19600	20700	26500	35800	56900	91900	174000	227000											514	206	196	207	265	358	569	919	1740	2270
515	20500	19500	20800	26500	35700	57100	91800	174000	227000											515	205	195	208	265	357	571	918	1740	2270
516	20600	19500	20700	26500	35600	56900	91900	174000	227000											516	206	195	207	265	356	569	919	1740	2270
517	20600	19500	20900	26500	35800	56800	91700	174000	227000											517	206	195	209	265	358	568	917	1740	2270
518	20500	19600	20800	26500	35700	57000	91900	174000	227000											518	205	196	208	265	357	570	919	1740	2270
519	20500	19600	20700	26500	35700	56900	91800	174000	227000											519	205	196	207	265	357	569	918	1740	2270
520	20600	19500	20800	26400	35700	56900	92000	174000	227000											520	206	195	208	264	357	569	920	1740	2270
521	20500	19600	20700	26500	35700	57000	91800	174000	227000											521	205	196	207	265	357	570	918	1740	2270
522	20600	19500	20700	26500	35800	56900	91800	174000	227000											522	206	195	207	265	358	569	918	1740	2270
523	20600	19600	20800	26400	35600	56800	91700	174000	226000											523	206	196	208	264	356	568	917	1740	2260
524	20600	19600	20700	26400	35600	57000	91900	173000	227000											524	206	196	207	264	356	570	919	1730	2270
525	20600	19500	20700	26500	35700	56700	91900	174000	227000											525	206	195	207	265	357	567	919	1740	2270
526	20500	19600	20700	26500	35600	56900	91800	173000	227000											526	205	196	207	265	356	569	918	1730	2270
527	20500	19600	20700	26500	35800	56800	91700	174000	227000											527	205	196	207	265	358	568	917	1740	2270
528	20600	19500	20700	26500	35700	56800	91600	173000	226000											528	206	195	207	265	357	568	916	1730	2260
529	20500	19500	20800	26500	35700	56700	91800	173000	226000											529	205	195	208	265	357	567	918	1730	2260
530	20500	19500	20800	26400	35800	56800	91600	173000	227000											530	205	195	208	264	358	568	916	1730	2270
531	20500	19600	20800	26500	35700	57000	91700	173000	226000											531	205	196	208	265	357	570	917	1730	2260
532	20600	19500	20800	26400	35700	56800	91600	173000	226000											532	206	195	208	264	357	568	916	1730	2260
533	20600	19600	20700	26400	35700	56700	91800	173000	226000											533	206	196	207	264	357	567	918	1730	2260
534	20500	19600	20700	26500	35600	56800	91800	173000	226000											534	205	196	207	265	356	568	918	1730	2260
535	20600	19500	20700	26500	35700	57000	91700	173000	226000											535	206	195	207	265	357	570	917	1730	2260
536	20500	19600	20800	26400	35700	56700	91600	173000	226000											536	205	196	208	264	357	567	916	1730	2260
537	20600	19500	20700	26500	35600	56700	91700	173000	226000											537	206	195	207	265	356	567	917	1730	2260
538	20500	19600	20700	26600	35700	56700	91700	173000	225000											538	205	196	207	266	357	567	917	1730	2250
539	20600	19600	20700	26400	35800	56800	91600	173000	226000											539	206	196	207	264	358	568	916	1730	2260
540	20600	19700	20800	26400	35700	56900	91700	173000	226000											540	206	197	208	264	357	569	917	1730	2260
541	20600	19600	20700	26500	35600	56800	91600	173000	226000											541	206	196	207	265	356	568	916	1730	2260
542	20600	19600	20800	26500	35600	56700	91400	173000	225000											542	206	196	208	265	356	567	914	1730	2250
543	20600	19600	20700	26500	35700	56800	91700	173000	225000											543	206	196	207	265	357	568	917	1730	2250
544	20600	19600	20700	26600	35800	56700	91500	173000	225000											544	206	196	207	266	358	567	915	1730	2250
545	20500	19500	20700	26500	35600	56800	91500	173000	225000											545	205	195	207	265	356	568	915	1730	2250
546	20700	19600	20800	26400	35800	56900	91400	173000	225000											546	207	196	208	264	358	569	914	1730	2250
547	20600	19600	20700	26500	35500	56800	91500	173000	225000											547	206	196	207	265	355	568	915	1730	2250
548	20700	19600	20800	26500	35600	56800	91500	173000	225000											548	207	196	208	265	356	568	915	1730	2250
549	20600	19600	20700	26500	35700	56900	91500	173000	225000											549	206	196	207	265	357	569	915	1730	2250
550	20600	19500	20800	26500	35700	56800	91600	173000	225000											550	206	195	208	265	357	568	916	1730	2250
551	20600	19500	20700	26500	35600	56800	91600	173000	225000											551	206	195	207	265	356	568	916	1730	2250
552	20500	19600	20800	26500	35800	56700	91600	173000	225000											552	205	196	208	265	358	567	916	1730	2250
553	20600	19600	20700	26500	35700	56700	91600	173000	225000											553	206	196	207	265	357	567	916	1730	2250
554	20600	19600	20800	26400	35700	56600	91600	173000	225000											554	206	196	208	264	357	566	916	1730	2250
555	20600	19600	20800	26400	35700	56600	91500	173000	225000											555	206	196	208	264	357	566	915	1730	2250
556	20600	19500	20800	26400	35700	56700	91500	173000	225000											556	206	195	208	264	357	567	915	1730	2250
557	20600	19600	20700	26500	35600	56400	91600	173000	225000											557	206	196	207	265	356	564	916	1730	2250
558	20500	19500	20700	26500	35700	56700	91500	173000	225000											558	205	195	207	265	357	567	915	1730	2250
559	20600	19400	20800	26400	35500	56800	91600	173000	224000											559	206	194	208	264	355	568	916	1730	2240
560	20500	19600	20700	26400	35700	56700	91300	172000	224000											560	205	196	207	264	357	567	913	1720	2240
561	20600	19600	20800	26400	35600	56700	91300	173000	224000											561	206	196	208	264	356	567	913	1730	2240
562	20600	19700	20800	26500	35700	56800	91500	173000	224000											562	206	197	208	265	357	568	915	1730	2240
563	20500	19500	20700	26400	35700	56700	91500	173000	224000											563	205	195	207	264	357	567	915	1730	2240
564	20600	19600	20700	26500	35700	56700	91500	173000	224000											564	206	196	207	265	357	567	915	1730	2240
565	20600	19600	20800	26500	35800	56700	91500	173000	224000											565	206	196	208	265	358	567	915	1730	2240
566	20600	19500	20800	26500	35700	56600	91400	172000	224000											566	206	195	208	265	357	566	914	1720	2240
567	20500	19500	20800	26400	35600	56800	91500	172000	224000											567	205	195	208	264	356	568	915	1720	2240
568	20700	19500	20800	26400	35700	56700	91500	172000	224000											568	207	195	208	264	357	567	915	1720	2240
569	20500	19600	20700	26400	35700	56900	91300	173000	224000											569	205	196	207	264	357	569	913	1730	2240
570	20600	19600	20800	26400	35600	56600	91500	173000	224000											570	206	196	208	264	356	566	915	1730	2240
571	20600	19600	20700	26400	35600	56500	91500	172000	223000											571	206	196	207	264	356	565	915	1720	2230
572	20600	19600	20700	26400	35600	56700	91500	172000	224000											572	206	196	207	264	356	567	915	1720	2240
573	20500	19600	20800	26400	35600	56700	91300	172000	224000											573	205	196	208	264	356	567	913	1720	2240
574	20600	19600	20800	26400	35600	56600	91100	172000	223000											574	206	196	208	264	356	566	911	1720	2230
575	20600	19600	20800	26400	35600	56600	91300	172000	223000											575	206	196	208	264	356	566	913	1720	2230
576	20600	19600	20800	26400	35700	56700	91300	172000	223000											576	206	196	208	264	357	567	913	1720	2230
577	20600	19600	20700	26400	35600	56800	91300	172000	223000											577	206	196	207	264	356	568	913	1720	2230
578	20600	19500	20700	26400	35700	56500	91200	172000	223000											578	206	195	207	264	357	565	912	1720	2230
579	20600	19600	20600	26600	35700	56700	91400	172000	223000											579	206	196	206	266	357	567	914	1720	2230
580	20600	19500	20700	26400	35600	56600	91300	172000	223000											580	206	195	207	264	356	566	913	1720	2230
581	20600	19600	20800	26400	35600	56600	91400	172000	223000											581	206	196	208	264	356	566	914	1720	2230
582	20600	19600	20800	26400	35600	56700	91300	172000	223000											582	206	196	208	264	356	567	913	1720	2230
583	20600	19500	20700	26400	35700	56500	91500	172000	223000											583	206	195	207	264	357	565	915	1720	2230
584	20500	19600	20700	26400	35600	56600	91200	172000	223000											584	205	196	207	264	356	566	912	1720	2230
585	20500	19500	20700	26400	35500	56800	91300	172000	222000											585	205	195	207	264	355	568	913	1720	2220
586	20600	19500	20700	26400	35600	56400	91300	172000	223000											586	206	195	207	264	356	564	913	1720	2230
587	20600	19500	20700	26400	35500	56700	91200	172000	223000											587	206	195	207	264	355	567	912	1720	2230
588	20700	19600	20700	26400	35600	56500	91200	172000	223000											588	207	196	207	264	356	565	912	1720	2230
589	20600	19600	20700	26300	35600	56700	91200	172000	222000											589	206	196	207	263	356	567	912	1720	2220
590	20600	19600	20700	26400	35500	56600	91300	172000	222000											590	206	196	207	264	355	566	913	1720	2220
591	20600	19500	20700	26400	35600	56700	91200	172000	222000											591	206	195	207	264	356	567	912	1720	2220
592	20500	19500	20700	26400	35600	56600	91000	172000	222000											592	205	195	207	264	356	566	910	1720	2220
593	20600	19600	20800	26400	35500	56400	91000	172000	222000											593	206	196	208	264	355	564	910	1720	2220
594	20500	19500	20700	26400	35500	56600	91200	172000	222000											594	205	195	207	264	355	566	912	1720	2220
595	20600	19500	20800	26400	35700	56500	91200	172000	222000											595	206	195	208	264	357	565	912	1720	2220
596	20600	19500	20800	26500	35600	56600	91200	172000	222000											596	206	195	208	265	356	566	912	1720	2220
597	20600	19500	20800	26400	35500	56700	91100	172000	222000											597	206	195	208	264	355	567	911	1720	2220
598	20500	19500	20800	26400	35500	56500	91200	172000	222000											598	205	195	208	264	355	565	912	1720	2220
599	20600	19500	20700	26400	35700	56500	91000	172000	222000											599	206	195	207	264	357	565	910	1720	2220
600	20600	19600	20700	26400	35600	56500	91200	172000	222000											600	206	196	207	264	356	565	912	1720	2220
