# Supplementary material for: Daptomycin forms a stable complex with phosphatidylglycerol for selective uptake to bacterial membrane
Source: eLife. 2025 Jun 2;13:RP93267. doi: 10.7554/eLife.93267 (PMC12129450; doi:10.7554/eLife.93267)
Supplement: Figure 2—source data 4. [file elife-93267-fig2-data4.xlsx]

## Sheet: Multi Scans KIN
Multi Scans KIN
Labels	9 KIN	8 KIN	7 KIN REPEAT	6 KIN	5 KIN	4 KIN	3 KIN	2 KIN	1 KIN
Type	Kinetic Scan	Kinetic Scan	Kinetic Scan	Kinetic Scan	Kinetic Scan	Kinetic Scan	Kinetic Scan	Kinetic Scan	Kinetic Scan
Comment
Start	0	0	0	0	0	0	0	0	0
Stop	600000000000	600000000000	600000000000	600000000000	600000000000	600000000000	600000000000	600000000000	600000000000
Step	1000000000	1000000000	1000000000	1000000000	1000000000	1000000000	1000000000	1000000000	1000000000
Fixed/Offset
XAxis	Time(ns)	Time(ns)	Time(ns)	Time(ns)	Time(ns)	Time(ns)	Time(ns)	Time(ns)	Time(ns)
YAxis	Counts	Counts	Counts	Counts	Counts	Counts	Counts	Counts	Counts
0	9213.88	36376.5	24967.8	22693.2	30700.8	76333.6	47760.8	93550.5	129609
1000000000	9279.59	36228.6	24970.9	22706.9	30720	76208.9	47747.4	93335.3	129520
2000000000	9168.83	36365.6	25050.8	22633.5	30730.2	75965.4	47719.1	93149.8	129369
3000000000	9239.7	36281.5	24883.6	22685.3	30650	76096.3	47470.2	93076.3	129164
4000000000	9165.12	36269	24909.5	22645.3	30694	75906.6	47443.4	92956	129207
5000000000	9204.05	36373.6	25010.5	22508	30657.2	75778.1	47460.2	92929.6	128588
6000000000	9173.38	36252.7	25039.2	22583.1	30649.2	75986	47460.6	93052.8	128489
7000000000	9149.72	36163.8	25042.9	22513.5	30601.6	75727.4	47440	92908.2	128407
8000000000	9189.88	36237.2	24841	22450.2	30673.5	75752.3	47261.3	92739.9	128466
9000000000	9120.57	36313	24963.8	22475.2	30528.1	75683.6	47185.9	92832.7	128130
10000000000	9134.81	36294.2	24880.2	22501.1	30693.1	75571.4	47214.2	92543.4	128128
11000000000	9134.64	36199.2	24904.5	22428.5	30571.3	75699.9	47259.7	92581.5	128029
12000000000	9179.56	36165.6	24914.1	22541.5	30480.7	75439.1	47250.1	92633.6	127754
13000000000	9148.82	36154.4	24915.2	22382	30485.4	75458.7	47110.7	92440.6	127759
14000000000	9129.05	36196.9	24864.3	22348.4	30433.3	75594	47135.1	92434.7	127604
15000000000	9092.95	36289	24916.3	22385.7	30359.8	75481	47296.8	92300.6	127618
16000000000	9086.19	36184.7	24944.5	22475.1	30449.7	75507.5	46994.7	92415	127486
17000000000	9092.08	36149.7	24826.7	22393.1	30488.7	75513.9	47129.2	92115	127571
18000000000	9085.72	36119.6	24754.1	22384.3	30378.2	75182	46934.7	92399.7	127427
19000000000	9095.12	36111.3	24845.6	22346.1	30502.5	75260.8	46936.3	92155.6	127371
20000000000	9150.36	36092.8	24781.8	22299.8	30390.5	75282.2	47028.8	92043.6	127163
21000000000	9114.41	36215.8	24922.7	22319.4	30469.4	75105.4	47019.1	92255.4	127202
22000000000	9055.8	36121.1	24799.8	22275.1	30425.8	75360.5	46856.1	92007.4	127002
23000000000	9051.29	36039.3	24745.1	22282.8	30288.4	75310	46921.4	91986.1	127401
24000000000	9067.38	36175.4	24776.4	22291.5	30340.6	75162.4	46985.2	91966.9	127244
25000000000	9069.54	36150.9	24745.7	22214.6	30330.1	75387.2	46817.7	91945.7	127265
26000000000	9115.19	36096.1	24747.8	22271.6	30329.7	75124.7	46824.2	91795.5	127116
27000000000	9071	36075	24771.1	22111.2	30375.8	75016.9	46814.5	91947	127158
28000000000	9074.14	36207.2	24722.2	22223.1	30291.7	75044.9	46860.4	91651.5	126985
29000000000	9121.71	36083	24713.7	22251.4	30338.9	75057.4	46821.9	91841.7	127197
30000000000	9093.38	36061.8	24722.1	22175.6	30242.4	75041	46868	91821	126923
31000000000	9062.14	35879.6	24761.9	22180.5	30310.8	75071.5	46772.9	91815.4	126644
32000000000	9029.68	36081.4	24832.4	22269.9	30243.2	74898.2	46827.7	91613	126816
33000000000	9085.84	35931.5	24643	22205.4	30364.8	75032	46599	91429.1	126731
34000000000	9060.67	36055	24777.9	22069.5	30351.1	74831.1	46614.8	91670.1	126723
35000000000	9046.19	35916.9	24677.2	22249.4	30328.7	74778.7	46661.8	91468.4	126695
36000000000	9070.5	36081.3	24613.2	22154.6	30322.9	74699.2	46686.3	91312.6	126773
37000000000	9015.9	36186.4	24662.4	22191.5	30129.2	74820.2	46492.6	91261.2	126723
38000000000	9086.37	36074.6	24538.4	22163.2	30160	74649.5	46551.2	91152.6	126650
39000000000	9070.55	36026.2	24678.9	22158.1	30148.1	74591.6	46650	91280.4	126199
40000000000	8928.24	35933.6	24663.1	22123.5	30181.7	74679.1	46561.1	91259.3	126449
41000000000	9013.24	35945.1	24661.6	22161.4	30121	74672.6	46694.2	91091.7	126322
42000000000	9082.7	36012.3	24577.3	22081.6	30159.5	74523.2	46426.5	91086.8	126080
43000000000	9010.15	36037.6	24546	22032.2	30256.3	74487.5	46537.8	91027.2	126370
44000000000	9008.28	35941.2	24519.8	22117	30177.3	74469.6	46528.2	90876.7	126230
45000000000	9012.25	35917.3	24590.2	22130.4	30174.8	74488.4	46306	90847.9	126103
46000000000	9021.63	36021.7	24643.8	22163.4	30076.6	74329.3	46451.3	90805.6	126108
47000000000	9023.83	35956.7	24420.5	22061.4	30123	74435.5	46520.8	90761.2	126189
48000000000	9036.53	35906.5	24515.9	22106.8	30092.3	74385.4	46420.2	90881.6	125891
49000000000	9046.64	35954.9	24588.2	22197.3	30106.2	74297.2	46297.3	90649.8	125874
50000000000	8994.49	35988.1	24452.1	22047.5	30101.3	74383.7	46186.5	90703.5	125705
51000000000	9042.94	35836.8	24492.3	22015.4	30059.7	74275.9	46288	90559.7	125755
52000000000	9011.42	35997.9	24400.6	22094.1	30014.4	74268.7	46220.5	90802.3	125725
53000000000	9002.75	35961.8	24500.4	21972.6	30081.5	74136	46246.7	90539.8	125560
54000000000	9016.07	36001.8	24542.6	22076.2	30032.9	74252.9	46268.8	90424.2	125490
55000000000	8976.33	35878.6	24466.6	22004.5	30147.1	74247.4	46269.7	90430.1	125381
56000000000	9016.62	35992.1	24495.5	22057.5	29978.3	74216.5	46243.5	90455.8	125530
57000000000	8999.39	35984.1	24395.7	22070.4	29906	74217	46175.5	90644.8	125426
58000000000	9008.27	35921.7	24505.2	22000.3	30007.5	74314.7	46203.5	90600.6	125473
59000000000	8995.41	35848.6	24401.7	21959.9	29923	74016.1	46263.3	90234.5	125152
60000000000	8941.13	35843.5	24589.7	22004.9	29911.4	74121.9	46234.7	90481	125302
61000000000	8938.86	35734.8	24382.5	22177.2	29915.5	74219.6	46119.7	90147.7	125208
62000000000	8965.67	35895.3	24356.5	21988.5	30005.8	74240.4	46165.7	90392.4	125273
63000000000	8976.72	35871	24318.8	21971.4	29951.2	74001.8	46090.7	90399.3	124935
64000000000	8999.58	35975.2	24380.1	22041.6	29873.7	74135	46150.3	90143.9	125070
65000000000	8989.08	35896.6	24375.4	21993.3	29884.3	73983.9	46142.1	90369.3	124965
66000000000	8904.79	35840.6	24501.2	22070.3	29948.9	73887.6	46002.3	90132.6	124990
67000000000	8952.67	35851.1	24421.1	22066.8	29910.8	73955.6	46028.4	89980.9	124744
68000000000	8925.62	35876.7	24339.2	22095.8	29927.2	73819.3	46037.7	90133.5	124951
69000000000	9011.86	35778.9	24304.2	21991.2	29879.8	73927.6	45935.9	90118.7	124769
70000000000	8954.23	35873.9	24322.9	22010.3	29857.2	73782.2	45835.9	89764.1	124893
71000000000	8989.79	35799.4	24368	22080.6	29950.4	73926.9	45858.6	89943.2	124824
72000000000	8934.89	35731.4	24292.3	22078.6	29957.7	73883.3	45876.8	89988.3	124612
73000000000	8907.58	35896.6	24258.6	22035.6	29870.1	73792.1	45966.2	89877.2	124438
74000000000	8974.58	35772.1	24252.8	22034.4	29883.6	73678.4	45878.9	89914.7	124559
75000000000	9017.63	35851.2	24330.2	22005	29964.3	73780.6	45869.6	89739.2	124522
76000000000	8959.78	35776.4	24201.2	21997	29854.6	73556.5	45896.5	89749.8	124412
77000000000	8978.34	35761	24285.2	22043.2	29868.4	73617.9	45835.2	89669.3	124450
78000000000	8898.83	35757.2	24262.8	22089.1	29755	73622.9	45729.5	89622.3	124407
79000000000	8956.53	35782.4	24123.4	22006.3	29858.4	73608.9	45799.2	89673.4	124333
80000000000	8894.74	35753	24234.6	22126.2	29818.7	73448.2	45840	89657.2	124350
81000000000	8943.24	35673.2	24234.9	21967.9	29854.8	73662	45735.2	89669.7	124073
82000000000	8893.44	35715	24216	22080.8	29825.7	73529.4	45742	89489.5	124329
83000000000	8934.38	35800.7	24257.3	22065.9	29712.6	73591.5	45830.2	89537.3	124106
84000000000	8887.49	35707.4	24169.9	22087.3	29780.5	73495.8	45656.6	89373.9	124081
85000000000	8878.01	35593.5	24089.9	21987	29678.5	73531.5	45649.9	89527.7	124064
86000000000	8891.62	35744.6	24218.3	21971.5	29682	73393	45789.8	89399.9	123936
87000000000	8876.83	35790.2	24044.9	22108.5	29801.7	73334.1	45814.9	89496.1	124075
88000000000	8875.07	35751.6	24201.6	22087.9	29787.3	73415.7	45621.6	89521.3	123845
89000000000	8890.02	35759.3	24210.9	22086.5	29723.5	73320.2	45714.7	89390.6	123838
90000000000	8878.31	35749	24119	22094.3	29695.1	73406.5	45679.7	89279.5	123941
91000000000	8920.75	35744.7	24046.5	22018.8	29794.4	73317	45627.1	89275.2	123740
92000000000	8871.68	35575.9	24169.6	22004.8	29734	73235.7	45548.9	89287.5	123608
93000000000	8885.13	35696.2	24180.2	22062.1	29804.3	73209.6	45528.7	89240.3	123760
94000000000	8891.61	35643	24047.6	22016.7	29794	73142.7	45516.6	89145	123492
95000000000	8894.5	35604.4	24131.8	21977	29821.4	73238.3	45597.9	89272.1	123471
96000000000	8928.75	35658.9	24108.2	22009.6	29849.8	73166.7	45506.6	88971.2	123817
97000000000	8870.94	35582.2	24176.4	21958.7	29685.6	73143.3	45637.1	89025.7	123513
98000000000	8853.95	35709.3	24110.2	22045	29794.4	73161	45447.7	89065.2	123492
99000000000	8909.84	35587.6	24014.6	21946.8	29713.3	73296.4	45530.4	88881.2	123189
100000000000	8884.21	35713.5	24017.2	22001.3	29648.9	73041.5	45635.5	89088.7	123460
101000000000	8871.64	35566.6	24083.4	22076.9	29708.5	73077.3	45601	89063.7	123601
102000000000	8812.53	35652.7	24030.3	22055.5	29747.2	73149	45465.4	88955.4	123320
103000000000	8875.26	35515.5	23993.8	21990.7	29630.2	72998.5	45429.3	89034.5	123194
104000000000	8909.96	35593.3	24009.7	22049.2	29622.4	73003.6	45460.6	88941.6	123251
105000000000	8796.2	35617.5	23975.5	22027.4	29634	72931.4	45365.3	88748.9	123264
106000000000	8834.17	35606.2	23998.5	22003.3	29665	73170.5	45359	88884	123264
107000000000	8915.1	35656.9	24015.9	22035.8	29712.4	72758.3	45353.6	88751.4	123026
108000000000	8867.11	35588	24001.2	21987.9	29647	73038.9	45423.2	88888.1	123071
109000000000	8852.87	35475.7	23913.1	22107.5	29734.1	73026.8	45505	88777.3	123192
110000000000	8846.83	35641.4	23944.1	22062.9	29622.9	72895	45315.3	88688.7	122952
111000000000	8879.35	35575.8	24007.6	22025	29602.2	73038.9	45427.2	88816.2	123000
112000000000	8865.01	35550.8	23919.7	22064.9	29685.9	72755.6	45362.9	88659.3	122877
113000000000	8841.49	35543.6	23973.7	22120.1	29672.4	72947.3	45348.4	88652	122743
114000000000	8890.73	35458.3	23962.2	21989.3	29596.1	73002.9	45198.1	88614.4	122958
115000000000	8904.31	35388.9	24030.4	21994.4	29840.4	72681.7	45264.6	88647.7	122612
116000000000	8789.6	35532.5	23968.3	21962.4	29623	72820.4	45102.1	88435.1	122496
117000000000	8831.05	35450.4	24026.1	22024.1	29604.2	72882.5	45297.1	88461.5	122448
118000000000	8852.11	35410.5	23881.7	22086.3	29468.5	72941	45111.6	88570.4	122751
119000000000	8823.88	35568.4	23950.9	22001.2	29686.4	72727.2	45266.5	88414.8	122553
120000000000	8834.07	35535.3	23856.4	22016.7	29611.6	72871.7	45297.3	88399.5	122293
121000000000	8854.31	35533.7	23969.1	22046.7	29601.1	72941.6	45226.3	88407.6	122442
122000000000	8853.28	35413.8	23891.1	22031.6	29620.9	72773.1	45155.1	88448.6	122551
123000000000	8888.9	35395.9	23984.9	21993.6	29592.6	72826.4	45002.8	88538.9	122419
124000000000	8799.69	35465.1	23809	22164.9	29668.9	72831.4	45214.8	88215.9	122405
125000000000	8874.19	35580	24026.9	21998.5	29575.8	72724.1	44934.3	88369.7	122319
126000000000	8847.07	35469.8	23972.7	22104.8	29575	72940.9	45215.7	88352.2	122372
127000000000	8755.01	35386.7	23810.6	22045.8	29604.1	72514.5	45081.1	88395.3	122448
128000000000	8781.32	35526.8	23870.1	22061.3	29513.6	72589.9	45078.6	88306.7	122182
129000000000	8821.43	35449.9	23836.9	22115	29488.9	72730.6	45138.4	88295.7	122191
130000000000	8802.57	35575.6	23935.9	22066.1	29511.2	72739.6	44993.9	88180.2	122236
131000000000	8821.79	35439.6	23958.3	22078	29526.8	72448.6	45022.2	88114	122010
132000000000	8779.48	35398.5	23890.3	22088.4	29414.4	72433.4	44984.9	88200.1	122197
133000000000	8820.53	35444.2	23861.8	21879.6	29487.1	72554	44994.7	88164.5	122342
134000000000	8797.86	35481	23816.4	22081.1	29551.3	72434.2	44925.4	88173.7	122238
135000000000	8847.12	35458.4	23819	22091.8	29633.6	72545.9	44989.6	88034	122076
136000000000	8769.16	35549.9	23923.6	22051.1	29559.8	72536.3	45020.3	88165.4	122284
137000000000	8817.46	35330.4	23836	22042.7	29575	72424.2	45013.3	88010.1	121969
138000000000	8836.76	35340.3	23881.8	22040.2	29491.5	72220	44938.8	88015.3	122138
139000000000	8811.58	35339.2	23716.6	22057.3	29582.6	72583	44997.5	87928.3	121922
140000000000	8759.36	35353.5	23824.6	22036.8	29553	72562.3	44940.6	87893.4	121956
141000000000	8805.18	35288.4	23846.7	22087.7	29519	72591.2	44928.4	88079.8	121805
142000000000	8832.91	35366	23850.6	21939	29595.6	72484.9	44883.5	87775	122048
143000000000	8821.36	35310.7	23770.2	22024	29457.9	72412.1	44956.1	87814.6	121792
144000000000	8789.07	35428.8	23727.9	22073.8	29466.5	72366.2	44800.2	87917.5	121841
145000000000	8779.8	35422.6	23863.7	22003.9	29490.6	72489	44912	87839	121831
146000000000	8786.63	35321.7	23797.8	22024.7	29516.9	72386.9	44817.7	87869.5	121696
147000000000	8825.95	35240.4	23745.1	22092.3	29497.4	72409.8	44817.6	87812.2	121718
148000000000	8861.14	35345.4	23783.4	22036.3	29417.2	72367.2	44945	87784.8	121620
149000000000	8790.26	35285.9	23735.4	22053.3	29487.9	72421.5	44827.9	87564.7	121766
150000000000	8787.7	35346.1	23783.7	22017.9	29508.8	72255.1	44848.9	87762	121770
151000000000	8841.14	35375.4	23762.4	22089.8	29507	72419.5	44803.2	87578.9	121551
152000000000	8850.55	35269.2	23674	22095.6	29488	72258.2	44915.9	87722.2	121761
153000000000	8799.77	35260.5	23698.4	22154	29421.3	72371.6	44834.8	87564.8	121329
154000000000	8800.51	35386.1	23761.3	22004.1	29521.3	72303.5	44797.5	87575.3	121399
155000000000	8756.75	35268.9	23777.9	22142.3	29542	72070.7	44897.2	87436.1	121433
156000000000	8759.18	35228	23669.4	22021.6	29473	72353.4	44880	87347.8	121362
157000000000	8855.48	35230.4	23662.6	22051.9	29451.7	72124.8	44792.3	87491.3	121635
158000000000	8783.97	35235.1	23776.2	22005.6	29428.5	72183.4	44800.9	87384	121496
159000000000	8778.71	35258.2	23813.7	21858.4	29498.7	72268.2	44681.4	87309.9	121400
160000000000	8799.34	35333.4	23729.1	22074.2	29454.6	72162.1	44697.3	87417.9	121524
161000000000	8776.67	35216.1	23623.5	22009.6	29447.7	72121.5	44660.8	87393.7	121496
162000000000	8793.59	35297.1	23697.3	21984.9	29437	72295.6	44710.1	87286.2	121388
163000000000	8769.58	35263	23673.6	22073.2	29392.8	71908	44717.8	87259	121391
164000000000	8737.19	35380.1	23764.7	22089.8	29514.8	72052.8	44762.6	87431.6	121399
165000000000	8786.14	35282.8	23664.4	22050.2	29390.5	72331.6	44738.4	87263.7	121427
166000000000	8805.06	35151.6	23766.6	21967	29443.6	72050.5	44630.1	87131.5	121174
167000000000	8795.56	35287.9	23695.7	22163.1	29348	72157.7	44638.3	87445.6	121413
168000000000	8811.64	35227.3	23738.1	22142	29289.5	71962.2	44624.9	87217.1	121430
169000000000	8785.25	35186.9	23608.2	22040.1	29466.4	72123.3	44548.6	87214.9	121303
170000000000	8735.82	35189.8	23733	22014.7	29493.5	72358.9	44611	87333.4	120991
171000000000	8761.04	35138.1	23763.1	22087.3	29265.5	72144.2	44626.9	87086.5	121179
172000000000	8729.58	35138.9	23789.7	22006.3	29393.1	72011.4	44634.5	87252.6	121021
173000000000	8759.04	35244.2	23665.2	22029.9	29434	72064.1	44605.8	87017.2	121129
174000000000	8817.22	35285.8	23718.7	22127.7	29278.1	72080.9	44676.9	87028.7	121196
175000000000	8766.67	35065.9	23771.2	22038.2	29446.4	72032.2	44516.3	87238.4	120875
176000000000	8827.95	35269	23670.8	21986.8	29342.5	72070.1	44493.1	87009.1	121099
177000000000	8742.19	35137	23615	22168	29481	71875.1	44629.2	87008.7	121106
178000000000	8822.67	35140.4	23701.5	22102.8	29443.1	72088.3	44503.4	87066.2	121080
179000000000	8786.66	35120.9	23688.4	22046.7	29323.4	71927.5	44593.9	86901.6	120908
180000000000	8787.52	35237.5	23601.6	22002.9	29371.1	71980.2	44482.7	86883.3	121067
181000000000	8716.87	35162.1	23629.1	22032.4	29505.4	71964.1	44534.7	86938.5	120824
182000000000	8745.69	35206.7	23670.5	22164.4	29282.4	71976.4	44628.3	86880.7	120758
183000000000	8731.93	35246.9	23656.4	21988.8	29374.6	71920.7	44428.9	86903	120845
184000000000	8757.99	35200.1	23644.2	22078.7	29378.9	71801.2	44408.3	86848.9	120821
185000000000	8748.21	35120.4	23674.1	22009.6	29326.4	71886.3	44452.8	87240	121006
186000000000	8749.5	35151.8	23710.5	21955.6	29409.9	71878.5	44502.7	86911.9	120895
187000000000	8794.68	35152.9	23677.6	22050.8	29313.3	71859.6	44383.2	86855.7	120948
188000000000	8809.09	35158.5	23646.2	21997.9	29264.4	71857.8	44456.4	86795.6	120848
189000000000	8778.03	35139.9	23635.9	21970.6	29424.1	71922.6	44457.3	86842.5	120712
190000000000	8740.78	35190.1	23537.7	22034.3	29334.4	71880.8	44417.1	86830.3	120453
191000000000	8780.03	35129.1	23661.3	22022.3	29386.3	71830	44471.8	86647	120390
192000000000	8689.67	35102.8	23644	22049.9	29387.2	71860.4	44456.5	86635.9	120664
193000000000	8796.42	35115.6	23528	21999.5	29224.1	71630.3	44317.6	86785.8	120689
194000000000	8799.15	35149.3	23602.1	22007.1	29366.2	71832.8	44399	86828.7	120533
195000000000	8736.97	35094	23558.1	22044.8	29358.4	71764.5	44462.8	86689.7	120698
196000000000	8711.06	35093.8	23548.1	22052.8	29342.1	71965.7	44434.2	86625	120825
197000000000	8640.58	35115	23585.5	21966.5	29271.3	71734.7	44290.3	86811.4	120647
198000000000	8704.76	35201.2	23590.6	22023.7	29251.6	71420.3	44273.5	86659.9	120590
199000000000	8728.42	34984.9	23546.8	22014.4	29339.2	71595.8	44387.1	86707.4	120657
200000000000	8729.12	35063.2	23522.7	22000	29344.7	71714.4	44204.3	86354.9	120881
201000000000	8721.71	35050.9	23647.9	22017.7	29301	71693.2	44382	86599.2	120625
202000000000	8747.83	35074.4	23619.4	22003.8	29315.9	71711.4	44319	86631.2	120628
203000000000	8768.92	35114.2	23617.7	22024.8	29315.2	71644.8	44343.8	86615.8	120755
204000000000	8697.1	35092.5	23581.7	22086	29319.9	71737.3	44309.4	86590.8	120588
205000000000	8733.96	35025.7	23613.7	22034.8	29317.3	71623.1	44361.4	86468.6	120435
206000000000	8819.67	35089	23601.2	21950.4	29313.7	71595	44271.6	86594.2	120347
207000000000	8709.98	35061.1	23611	22036.3	29355.3	71726.6	44169.1	86424	120523
208000000000	8671.1	35048.1	23447.8	22077.4	29273.1	71641.6	44137	86537.2	120490
209000000000	8735.64	35066.4	23598	21965.5	29231.3	71381.8	44204.9	86402.4	120437
210000000000	8685.34	34997.8	23592.2	22077.1	29226.6	71570	44258.8	86493.9	120661
211000000000	8776.34	35026.4	23512.4	22037.9	29147	71698.8	44265.7	86367.7	120283
212000000000	8728.49	35052.9	23544.1	21982	29318.6	71622	44214.3	86355.8	120316
213000000000	8739.78	35044.3	23581	21988.1	29265.7	71715.3	44180.4	86313.1	120066
214000000000	8654.44	35128.3	23593.7	21970.8	29330.4	71655.4	44161.7	86374.8	120432
215000000000	8731.41	35025.1	23531.9	22027.3	29278.3	71554.7	44366.6	86232	120257
216000000000	8680.81	35118.7	23530	22068.1	29204.7	71506.2	44306.7	86002.6	120253
217000000000	8680.98	35058.7	23464.6	22053	29286.1	71579.7	44264.5	86189.4	120213
218000000000	8755.64	35087.8	23530.4	21985.4	29269.9	71312.4	44107.3	86194.2	120314
219000000000	8636.65	35104.7	23402	22043.9	29190.8	71497.6	44183.4	86187.4	120463
220000000000	8706.32	35002.1	23433.4	21987.3	29240.2	71599.7	44128.3	86204.6	120360
221000000000	8705.55	34953.9	23513.4	21980	29235.1	71414	44170.3	86224.4	120179
222000000000	8727.75	35120.1	23600	22057.9	29221.4	71476.6	44149.3	86106.7	119956
223000000000	8761.28	35070.8	23439.8	22016.7	29272.7	71333.9	44134.9	86169	119954
224000000000	8719.19	34992.1	23397.6	21960.5	29281.5	71412.5	44152.7	86074.2	120144
225000000000	8691.01	34950.2	23653.5	21952.9	29326.6	71407.5	44083.7	86108.7	119992
226000000000	8669.12	35022	23457.9	22034.9	29277.3	71481.2	44045.2	86043.7	120099
227000000000	8734.27	35068.9	23457.5	21977.6	29314.4	71431.6	44210.7	86196.4	120208
228000000000	8770.09	35045.9	23582.3	21946	29236.1	71327.5	44054.3	86041.6	119909
229000000000	8744.5	34911.5	23506.1	21992.6	29307.1	71510.2	44025.2	85909.6	119991
230000000000	8696.79	35026.9	23445.7	22058.2	29184.7	71383.1	43919.8	85913.3	119987
231000000000	8697.87	35049.2	23448	22047.7	29337	71497.2	44033.6	86072	120134
232000000000	8691.04	34964.5	23493.2	22043.5	29264.8	71563.8	44072	85967.3	119912
233000000000	8723.68	35056.3	23513.3	21943.2	29314.6	71529	44061.6	86140.3	120003
234000000000	8661.81	34994.6	23492.2	21945.4	29288.6	71360.5	44106.2	86049.1	119906
235000000000	8716.04	34951.3	23425.7	21918.4	29238.1	71372.4	44092.6	85952.4	119946
236000000000	8734.93	34929.7	23475.4	21975.6	29188.1	71285.2	44102	85874.2	120030
237000000000	8749.27	35008.5	23453.1	22026.7	29301	71331.3	44081.9	85911.5	120054
238000000000	8669.99	35133	23460.2	21995.4	29209.9	71412.5	44083.5	86086	119838
239000000000	8743.66	35114.3	23448.5	22035.9	29316.1	71340.2	43893.4	85803.6	119985
240000000000	8743.85	35088.6	23475.4	21959.9	29286.6	71348	43987.7	86021.8	119850
241000000000	8746.68	34936	23485.3	21999.5	29264.8	71226.2	44094.7	85759.2	119760
242000000000	8707.98	35043.4	23547.5	22012.8	29173.4	71372.4	44036.8	85761.7	119743
243000000000	8700.25	34923.6	23449.2	21983.6	29257.6	71273	44015.1	85734.3	119787
244000000000	8719.29	34885.1	23559.4	21969	29209	71445.3	44018.1	85776.4	120024
245000000000	8676.93	34993.2	23489.5	22022.8	29143.6	71179.6	43835.8	85477.4	119733
246000000000	8684.26	35079.7	23450.8	21986.4	29353.8	71293.5	44031	85838.9	119963
247000000000	8722.52	35009.4	23454.8	21993.9	29223.6	71227.1	43909.3	85761	119779
248000000000	8711.84	35038.1	23501.9	22076.5	29343.8	71348.2	43791.4	85799	119688
249000000000	8693.74	34996.4	23470.9	21958.3	29167.9	71298.7	43965.3	85728.8	119790
250000000000	8597.26	34952	23426.2	21964.4	29272.7	71278.8	43900.1	85738.8	119837
251000000000	8703.06	34812.1	23382.4	21978.6	29229.6	71199.4	43849.1	85707	119450
252000000000	8699.16	34962.9	23377.5	21991.5	29241.4	71238.5	43962.7	85751.7	119656
253000000000	8651.77	34955.9	23412.8	22041.6	29136.1	71227.9	43845.9	85758.7	119636
254000000000	8699.19	34864.7	23391.4	21950.6	29055.7	71276.4	43807	85755.8	119600
255000000000	8716.67	34911.7	23392.5	22048.7	29113.3	71112.1	43831	85680.4	119449
256000000000	8656.45	34974.7	23455.8	21973.6	29187.2	71148.6	43834.1	85806.1	119519
257000000000	8702.8	34944.4	23459	22004.8	29171.4	71175.1	43891.1	85553.5	119844
258000000000	8675.42	34862	23489.2	21959.9	29121.3	71148	43894.4	85394.3	119588
259000000000	8712.53	34860.5	23374.8	21962.6	29089.1	71124.1	43822.9	85607.7	119657
260000000000	8719.64	34842.8	23442.6	22010.4	29105.8	71172.5	43798.5	85393.9	119741
261000000000	8690.09	34874.2	23430	22034.2	29170.7	71212.6	43812.1	85666.1	119362
262000000000	8667.56	34950.8	23424.5	21923.6	29246.4	71225.2	43823.5	85590.5	119450
263000000000	8760.11	34891.4	23366.5	22046.7	29147	71120.4	43694.4	85552.4	119324
264000000000	8647.88	34945.5	23487.6	22052.2	29143	71113.4	43817.2	85575.4	119455
265000000000	8702.35	34868.5	23392.8	22051.7	29156	71170.3	43797.6	85498.8	119470
266000000000	8728.29	34933.3	23407.9	21974.4	29238.2	71207	43905.2	85733.5	119492
267000000000	8664.25	34936.8	23383.3	22095.9	29152.2	71172.7	43727.1	85435	119408
268000000000	8699.04	34900.2	23454.6	21957.6	29177.7	71014.2	43812.5	85461.1	119505
269000000000	8642.18	35006.6	23374.1	21924	29186.2	71098.3	43746	85485.7	119234
270000000000	8715.56	34853	23423.3	21989.3	29135.6	70898.7	43665.7	85380.6	119436
271000000000	8664.75	34896.4	23425.3	21904.6	29214.3	71006.5	43857.6	85213.2	119384
272000000000	8686.19	34904.1	23428.5	21907.9	29115.4	70967.6	43886.1	85461.7	119397
273000000000	8669.33	34850.7	23477.8	22009	29094.6	71112.5	43762	85530.2	119427
274000000000	8683.89	34906.5	23375.3	21948.6	29104.1	71125.2	43768	85168.7	119513
275000000000	8642.37	34754	23309.7	21909	29144.3	70902.6	43634	85218.9	119191
276000000000	8676.64	34900.1	23413.4	21938.5	29133.5	71013.5	43635.6	85357.1	119322
277000000000	8621.75	34803.3	23402	21930.7	29156.1	71021.9	43802.4	85302.2	119077
278000000000	8719.62	34866.6	23359.9	21951.2	29263.6	70919	43580.5	85219	119239
279000000000	8705.34	34861.9	23268.2	21926.9	29013.8	70946.5	43673.6	85438.2	119095
280000000000	8662.39	34903.4	23321.6	21976.4	29186.3	70773.4	43581.7	85215.8	119297
281000000000	8657.17	34741.6	23456.3	21931.3	29071.2	70848.4	43672.6	85382.4	119260
282000000000	8664.81	34843.3	23326.8	22030.5	29179.1	71139.8	43765.8	85368.5	119045
283000000000	8662.75	34845.1	23344	21987.8	29130.4	71068.2	43656.2	85241.5	119127
284000000000	8696.93	34860.7	23402.9	22032.9	29085.9	70873.3	43615.3	85294.4	119188
285000000000	8602.01	34848.1	23373.8	21950	29174.1	70872.2	43522.5	85159.1	119061
286000000000	8693.18	34829.6	23366.2	22005.2	29107	70937.6	43605.1	85184.8	119251
287000000000	8682.63	34815.8	23333.1	21976.2	29137.7	70838.2	43560.3	85121.5	118954
288000000000	8690.16	34821.9	23310.7	21946.4	29190.6	71030.3	43598.7	85372.9	119032
289000000000	8654.25	34767.3	23404.5	21979.3	29060	70833.1	43727.9	85038.2	119010
290000000000	8661.59	34764.6	23413.7	21906.9	29098.9	70912.1	43729.5	85134.4	119107
291000000000	8647.28	34854.6	23332.5	21921.3	29209.9	70932.4	43561.4	85291.9	119023
292000000000	8658.38	34988	23360	21990.8	29058.3	70737.6	43449.4	85022.5	118954
293000000000	8603.31	34890.7	23327.5	21930.2	29159.1	70927.4	43595.7	85177.9	118719
294000000000	8647.91	34748.1	23362.8	21876.2	29066.3	70862.4	43555.5	85122	118881
295000000000	8659.01	34855.5	23412.6	21972.4	29089.3	70952.6	43700	85006	118922
296000000000	8603.81	34795.6	23366.3	21909.2	29020.4	70920.9	43453	85305.2	118839
297000000000	8608.46	34759.8	23317.9	21955	29091.4	70697.2	43697.7	85064.1	118888
298000000000	8616.49	34841	23302.5	22005.1	29076.8	70791	43444.4	85234.8	118869
299000000000	8706.22	34799.2	23284.4	21940.1	29109.4	70931	43550	84924.1	118965
300000000000	8671.59	34857.4	23396.9	21955.3	29051.6	70842.6	43481.8	85055.2	118964
301000000000	8608.27	34861.4	23264.3	22033.2	29037	70832.1	43570.9	84971.5	118804
302000000000	8665.24	34867.3	23296.7	21887.7	29173.8	70830.5	43436.7	85023.4	118704
303000000000	8663.97	34863.3	23245.1	21899.7	29137.2	70787.2	43605.5	84983.2	118929
304000000000	8585.94	34823.7	23302.7	22015.4	28931.1	70619.5	43689.8	85004.2	118747
305000000000	8622.72	34727	23326.3	21902.4	29078.5	70847.8	43549	85046	118676
306000000000	8598.37	34896.2	23411.6	21875.2	29143.9	70736.6	43586	85170.4	118789
307000000000	8632.54	34788.6	23334.5	21949.1	29204.2	70778.3	43462.4	84838.4	118461
308000000000	8692.16	34721.1	23412	21927.8	29151.4	70568	43580.6	84916.7	118627
309000000000	8668.94	34657.2	23318.8	21920.5	29000	70827.9	43496.3	84861.4	118770
310000000000	8610.27	34937.1	23266	21901.3	29196.9	70837.8	43539	84934.7	118743
311000000000	8653.76	34794.1	23350.9	21907.9	28983.6	70744.9	43445.4	85047	118663
312000000000	8665.18	34928	23305	21909.8	29034.3	70660.5	43451.3	84953	118895
313000000000	8587.59	34708.2	23422.1	21790.5	29065.8	70680.9	43526.7	84944.9	118592
314000000000	8629.15	34832.8	23284.1	21990.3	29031.3	70696.3	43439	84906.7	118720
315000000000	8668.77	34908.4	23339.6	21920.4	28986.2	70745.2	43489.8	84830.1	118872
316000000000	8652.41	34703.7	23272.6	22005.3	29098.2	70760.8	43586.1	84892.8	118626
317000000000	8691.55	34755.3	23358.8	21890.9	29046.1	70568.3	43453.3	84804	118558
318000000000	8646.94	34722.5	23276.9	21993.8	29066.7	70686.4	43463.1	84803.4	118598
319000000000	8651.05	34672.4	23261.7	21817.2	29072.4	70679	43464	84593.3	118636
320000000000	8636.5	34820.1	23315.5	21857	29098.7	70505.2	43303.8	84881.8	118511
321000000000	8590.02	34742.9	23300.8	21902.9	29101.9	70776.3	43405.8	84801.3	118471
322000000000	8664.52	34715.8	23304.7	21933.8	28948.7	70698.3	43371.3	84822.8	118718
323000000000	8605.56	34788.1	23206.7	21902.3	29017.5	70488.8	43470.6	84914.9	118431
324000000000	8637.76	34673.6	23303.1	21872.5	29010.3	70540.9	43456.6	84842.1	118374
325000000000	8700.78	34621.6	23295.8	21945.6	29011.1	70583.2	43578.6	84770.7	118445
326000000000	8614.9	34755.3	23256.1	21954.7	29041.1	70532.2	43427.3	84670.7	118432
327000000000	8639.43	34709.6	23225	21909.8	28972.9	70599.2	43475.4	84712.4	118531
328000000000	8645.72	34832.1	23307.5	21934.3	28939.6	70424.6	43416.1	84660.2	118410
329000000000	8663.32	34683.7	23298.4	21941.5	28968	70564.1	43515.6	84504	118420
330000000000	8578.27	34789.4	23227.9	21874.8	29016.1	70601.3	43390.8	84589.2	118457
331000000000	8653.78	34746.8	23311.9	21991.4	29042.4	70651.1	43381.5	84601.5	118485
332000000000	8612.8	34617.2	23319.2	21824.8	29042.6	70598.4	43358.5	84720.9	118235
333000000000	8588.47	34722.9	23245.4	22002.3	28986.7	70604.5	43373.3	84647.2	118201
334000000000	8588.11	34743.3	23200	21919.5	29070.7	70509.8	43439.8	84763.7	118389
335000000000	8627.9	34676.1	23303.9	21927.3	29121.2	70589.5	43312	84699.6	118270
336000000000	8600.13	34711.3	23249.5	21940	29015.1	70544.4	43293.3	84596.5	118175
337000000000	8630.94	34647.7	23293.1	21956.6	29090.1	70523	43310.5	84634.3	118192
338000000000	8617.78	34723	23290.1	21919.6	28933.6	70474.5	43384.8	84299	118234
339000000000	8667.1	34767.1	23146.6	22024.8	29093.2	70649.9	43490.4	84783	118129
340000000000	8642.72	34688	23294.5	21883.1	29045.8	70306.1	43322	84451.9	118244
341000000000	8624.54	34685.3	23187.2	21854.2	29084.7	70618.9	43397.8	84682.4	118222
342000000000	8663.74	34590.1	23352.1	21950.6	29030.2	70413.5	43367	84422.3	118100
343000000000	8629.62	34596.1	23252	21867.2	29078.3	70560	43347.5	84649.1	118293
344000000000	8660.52	34681.4	23214.5	22009.4	28990.6	70471.1	43318.2	84429.3	118443
345000000000	8644.36	34707.3	23263.5	21932.6	28997.9	70359.7	43147.7	84519.9	118036
346000000000	8578.03	34708.9	23249.9	21850.7	29037	70512.1	43275.9	84719.5	118164
347000000000	8638.77	34613.6	23229.2	21936.6	29044.9	70507.9	43257.4	84497.2	118197
348000000000	8680.31	34726.8	23245.9	21953.9	29115	70515.5	43243.3	84629.9	118090
349000000000	8621.27	34674	23221.5	21894.5	29017.6	70502.7	43357.1	84501.9	118086
350000000000	8590.51	34747.9	23328.4	21948.6	28992	70501.8	43404	84409.9	117927
351000000000	8562.14	34633	23169.9	21818.6	28942.3	70369.6	43177.1	84449.5	118061
352000000000	8594.33	34640.1	23275.6	21958.7	28966.6	70332.7	43269.2	84430.2	118139
353000000000	8589.14	34760.3	23163.8	21961.7	28956.1	70520.3	43281.4	84554.5	118018
354000000000	8638.16	34758.5	23189.9	22004	29113.5	70481.8	43343.5	84471.6	117864
355000000000	8628.23	34784.3	23190.2	21824.4	28940.1	70439.8	43338	84422.6	118076
356000000000	8577.35	34541.1	23197.3	21982.6	29044.2	70290.9	43244.1	84528.2	118029
357000000000	8605.24	34692.7	23195.8	21894.2	28943.4	70318.5	43199.1	84302.8	117948
358000000000	8593.83	34600.2	23210.4	21866	28829.4	70357.3	43184.2	84366	117961
359000000000	8595.65	34651.4	23140.2	21877.5	28914.3	70169.7	43238.2	84378.3	118040
360000000000	8607.44	34693.3	23115.1	21884.2	29036.1	70238	43171.7	84376.7	117926
361000000000	8618.88	34619.2	23149.3	21854.6	29064.6	70212	43204.8	84283.1	117886
362000000000	8607.83	34712.4	23166	21922	29092.1	70377.7	43244.7	84444.6	117889
363000000000	8643.45	34592.7	23150.7	21963.4	28897.5	70281.6	43043.9	84192.8	118029
364000000000	8646.25	34643.6	23193.3	21901.3	29024.8	70260.3	43195.4	84333.5	117958
365000000000	8625.43	34709.6	23165.5	21791.7	29036.2	70470.4	43242.4	84292.7	117774
366000000000	8658.31	34749.7	23317.6	21953.5	29071.2	70340.1	43034.5	84247.8	117950
367000000000	8533.54	34637.5	23135.5	21942.1	28980.7	70400.2	43291.6	84313.2	117898
368000000000	8597.86	34705	23167	21988.8	28981.7	70231.4	43284.2	84039.6	117911
369000000000	8615.41	34684.9	23271.6	21893.9	28993	70353.5	43214.4	84281.9	117842
370000000000	8540.44	34699.1	23205.4	21939	28988.4	70251.8	43133.8	84225	117811
371000000000	8668.29	34644.7	23178.6	21920.6	29010.1	70333.9	43229.4	84353.7	118036
372000000000	8600.45	34587.4	23156.6	21844.7	28974.9	70270.5	43073.5	84289.1	117826
373000000000	8629.13	34603.8	23284.8	21850	29000.4	70244.7	43129.4	84246.7	117779
374000000000	8631.27	34738.1	23308.3	21873.3	28869	70286.9	43223.1	84280.3	118028
375000000000	8621	34749	23119.3	21886.5	28978.9	70352.8	43263.6	84168.5	117888
376000000000	8602.13	34706.1	23314.8	21836.3	28990.4	70178.1	43102.2	84294.1	117701
377000000000	8626.57	34669.6	23162.9	21824.4	28981.6	70226.9	43032.3	84188.8	117797
378000000000	8604.99	34738.6	23210.3	21879.5	28977.3	70120.3	43049.9	84144	117728
379000000000	8600.2	34670	23106.3	21865.1	28941.9	70305.6	42996.8	84215.8	117694
380000000000	8577.12	34539.1	23290.9	21888.7	28896.9	70365.9	43114.1	84303.9	117643
381000000000	8603.65	34566.8	23227.8	21854.4	28965.7	70196.2	43044.9	84146.9	117766
382000000000	8577.08	34611	23233.2	21842.7	29007.7	70272.2	43062.6	84093.9	117738
383000000000	8597.13	34588.9	23179.3	21871.2	28929.9	70149.3	43199.9	84083.1	117618
384000000000	8549.19	34646.5	23287.6	21776.9	28941.1	70283.2	43163.6	84060.5	117581
385000000000	8604.94	34517.9	23177.8	21873	28777.1	70115.7	43088	84226.1	117711
386000000000	8621.36	34558.4	23140.8	21827.9	29039.9	70176.3	43009.9	84195.5	117494
387000000000	8587.03	34700.2	23173.3	21966.3	28936.2	70165	43036.1	84102.9	117760
388000000000	8647.86	34493.9	23260.7	21867.5	28956.6	70251.9	42968.1	84021.3	117663
389000000000	8559.93	34697.9	23175.6	21808.3	28982	70124.1	43131.1	83909.7	117536
390000000000	8640.55	34496.9	23217.3	21898.7	29006.4	70218.9	42993.2	84184.3	117417
391000000000	8589.71	34516.7	23178.4	21833.6	28900.1	70102.2	43154.3	84065.3	117504
392000000000	8614.27	34683	23208.1	21834.8	29008.2	70237.9	42944.2	84051.6	117537
393000000000	8605.64	34511.5	23109.4	21839	28843.8	70218.2	43083.8	83963.6	117577
394000000000	8642.95	34630.4	23258.8	21925.7	28926.5	70054.6	43087.1	83986.8	117499
395000000000	8575.6	34646.2	23158.6	21883.1	28873.7	70229.2	43226.8	83957.6	117648
396000000000	8601.63	34404.1	23150.9	21892.8	28881.6	70115.1	43063.1	84087.6	117684
397000000000	8599.51	34590.2	23181.4	21884.3	28965.4	70273.9	43107.4	84086.3	117626
398000000000	8574.54	34573.3	23140.2	21918.6	28890.6	70225.4	43004.4	83918.6	117418
399000000000	8660.88	34637.8	23067.5	21841.8	28748.7	70101.2	43135.7	83939.8	117544
400000000000	8598.49	34567	23063.6	21907.5	28831.7	70381.4	43041	83949.4	117392
401000000000	8623.6	34631.8	23029.6	21920.3	28930.6	70155.5	42958.4	84106.6	117411
402000000000	8654.34	34605.1	23118.9	22001	28935.6	70001	43051.4	83928	117474
403000000000	8566.16	34584.7	23280.8	21783.1	28901.9	70211.8	42987.2	84038.8	117438
404000000000	8618.41	34622.6	23198.9	21797.1	28855.4	70105.5	43017.2	83905.5	117260
405000000000	8577.62	34507.7	23116.8	21777.9	28909	70064.9	42921.6	83753.6	117214
406000000000	8602.48	34601.5	23191.7	21861.6	28927.8	69900.1	43023.1	83992	117335
407000000000	8591.81	34546.5	23113	21792.4	28937.6	70080.1	42988.6	83716.1	117340
408000000000	8596.51	34580.5	23222.8	21855.4	28966.1	70096.7	42940	83790.8	117347
409000000000	8617.08	34505.9	23149.6	21917	28924.3	69827	43070.5	83983.2	117335
410000000000	8670.34	34545.2	23263.1	21907.1	28854.5	70041.3	43053.5	83813.9	117335
411000000000	8543.78	34493.6	23221	21846.4	28980.4	70108.7	42974.7	83710.1	117381
412000000000	8571.21	34563.8	23147.1	21837.9	28867.9	70125.4	42929.8	83836.4	117035
413000000000	8606.39	34686.4	23140	21770.9	28898.3	70058.3	42963.3	83716.3	117468
414000000000	8594.47	34497.6	23206.5	21863.2	28823.4	70047.6	42960.5	83954.7	117202
415000000000	8548.56	34569.5	23144.2	21852.8	28891.5	70033.4	42993	83940.5	116948
416000000000	8552.96	34467	23065.6	21891.2	28972.5	69828.8	42982.1	83820.1	117152
417000000000	8546.51	34534.7	23072.7	21897.7	28919.9	70077	43027.2	83768.9	117227
418000000000	8558.37	34552.4	23194.4	21870.6	28880.6	69995.7	42969.2	83698.1	117378
419000000000	8600.77	34510.7	23116.1	21799.2	28955.1	69903.8	42954.9	83833.9	117153
420000000000	8631.31	34612.1	23042.9	21829.1	28912.4	69792.2	42938	83854.3	117481
421000000000	8624.4	34617.9	23098.2	21932.4	29005.7	69934.5	42957.5	83799.6	117232
422000000000	8552.95	34528.6	23195.8	21797.4	28966.6	69943.7	42957.5	83816.7	117022
423000000000	8612.41	34556.3	23244.4	21923.2	28967.3	69907.1	42844.7	83776.4	117108
424000000000	8565.41	34448.4	23138.3	21888.1	28752.7	69940.3	42924.1	83713.3	117266
425000000000	8587.48	34579.4	23110.8	21767.4	28963.9	69973.4	42891	83775	117068
426000000000	8585.81	34555.5	23150.4	21949.5	28821.5	69930.4	43005.6	83792.8	117108
427000000000	8618.55	34515.6	23175	21855.1	28953	69930	42958.4	83802.1	117222
428000000000	8604.49	34462.8	23053.6	21777.6	28871.7	69762.2	43031.6	83911.6	117105
429000000000	8563.96	34506.5	23019.3	21868	28911.3	70091.1	42888.2	83613.9	116984
430000000000	8629.67	34522.9	23072.1	21850.4	29035.9	70046.8	42982.9	83673.7	116878
431000000000	8615.02	34600.4	23055.2	21831.4	28942.2	69965.4	42862.1	83704.6	117077
432000000000	8652.94	34473.7	23117.8	21904.1	28924.3	70009.6	42904.4	83825.6	117156
433000000000	8574.05	34399.1	23151.7	21834.6	28913	69915	42968.6	83858	117178
434000000000	8589.65	34623.5	23086.7	21834.1	28747.9	69921.7	43031.7	83809.9	116982
435000000000	8661.51	34472.7	23094.2	21767.7	28979.7	69943.1	42876.4	83710.3	117025
436000000000	8551.19	34442.2	23124.1	21846.7	28855	69765.6	42882.4	83535.7	116998
437000000000	8642.32	34583.8	23147.6	21889.2	28923.3	69872.4	42782.9	83679.3	116950
438000000000	8552.59	34532.7	23027.9	21817.5	28921.5	69787.3	42956.9	83707	117021
439000000000	8624.35	34457.9	23114.8	21982.7	28933	69668.3	42778.5	83714.4	117070
440000000000	8599.04	34489.1	23177.6	21763.9	28855.5	69907.8	42844.1	83792	116864
441000000000	8598.56	34428.6	23117.5	21848.4	28912	69892.2	42907.3	83640.8	116900
442000000000	8617.5	34513.4	23150.6	21883.1	28726	69860.4	42933.5	83659.9	116882
443000000000	8548.07	34422.8	23026.3	21852.9	28881.9	69765.4	42731.8	83538.4	117080
444000000000	8595.66	34494.1	23011.9	21855.4	28847.7	69884.3	42931.4	83776.5	116826
445000000000	8580.64	34565	23067.1	21876.6	28823.2	69893.7	42910	83627.7	116844
446000000000	8579.18	34482	23030.2	21742.3	28803.1	69991.8	42870.6	83756.1	116855
447000000000	8609.01	34427.6	23171.2	21799.2	28892.4	69895.1	42800.8	83660.7	116815
448000000000	8557.95	34517.5	23112.8	21752	28879.4	69858.5	42732	83630.9	116805
449000000000	8529.43	34460	23220	21816.7	28800.1	69745.2	42905.4	83464.6	116963
450000000000	8578.66	34428.8	23058.9	21715.9	28790.6	69927.2	42841.7	83485	116836
451000000000	8559.43	34433.2	23073.8	21801.9	28819.8	69803.4	42830.7	83664.4	116861
452000000000	8525.07	34491.1	23088.4	21791.7	28871.2	69801.6	42937.1	83437	116842
453000000000	8552.34	34549.8	23076.7	21759.7	28855.1	69804.9	42893.8	83353.9	116937
454000000000	8553.35	34517.1	23168.1	21748.4	28803.1	69783.3	42698.7	83556.3	116830
455000000000	8545.89	34377.8	23099.1	21864.6	28900.3	69800.4	42858.4	83421.1	116600
456000000000	8589.15	34482.9	23133.3	21796.9	28768.2	69849.2	42833	83710	116678
457000000000	8628.25	34524.3	23063.2	21801.6	28821	69964.3	42920.8	83490.3	116942
458000000000	8577.52	34437.6	23175.2	21737.8	28796.8	69885.6	42810.2	83568.2	116766
459000000000	8620.62	34487.9	23031.5	21746.2	28737.2	69836.2	42791.5	83605.8	116849
460000000000	8576.39	34510.2	23014.5	21791.9	28886.1	69695.4	42877.2	83629.4	116876
461000000000	8565.07	34404.1	23015.6	21817.4	28880.6	69890	42786.2	83570.2	116598
462000000000	8560.47	34517.2	23094.2	21755	28827.5	69806.8	42864	83298.7	116715
463000000000	8539.84	34477.6	23102.3	21805.4	28862.3	69775.7	42781.8	83472.5	116670
464000000000	8557.14	34514.5	23115.7	21794.7	28742.2	69723.4	42851.5	83545	116854
465000000000	8518.95	34507.2	23079.4	21808	28782.4	69543.6	42710.8	83464.3	116519
466000000000	8594.9	34446.9	23036.7	21787.5	28910.3	69640.5	42819.5	83625.6	116698
467000000000	8525.92	34465	23177.8	21831.5	28864.2	69601.2	42790.8	83430.3	116624
468000000000	8527.36	34510.5	23007	21796.8	28817.9	69570.3	42943.1	83392	116545
469000000000	8484.87	34345	22972.8	21742.7	28924.2	69856	42766.9	83514.2	116676
470000000000	8577.05	34420.8	23097.1	21780.3	28757.1	69644.7	42684.3	83449.1	116500
471000000000	8490.83	34427.8	23021	21820.3	28773	69617.4	42757.7	83606.3	116777
472000000000	8531.72	34349.9	23090	21729.6	28815.2	69791.5	42789.5	83425.4	116558
473000000000	8529.28	34467.5	23060.5	21756.1	28831.1	69616.2	42757.2	83286.9	116402
474000000000	8591.96	34530.1	23055	21797.1	28781.4	69674.4	42726.7	83412.3	116484
475000000000	8559.3	34370.9	23020.8	21767.3	28864.5	69693.4	42747.6	83386.8	116510
476000000000	8531.66	34443.7	23051	21752.8	28823.3	69508.5	42823.3	83456.9	116482
477000000000	8571.38	34395.6	23107.9	21792.9	28802	69714	42691.5	83347.4	116587
478000000000	8521.02	34405.7	23045.1	21736.7	28828.9	69747.8	42767.8	83453.1	116614
479000000000	8561.14	34471.2	22970.1	21779.2	28761.6	69652.3	42637.2	83417.4	116412
480000000000	8488.38	34431.8	23159.8	21869.2	28908.9	69442.2	42698.5	83375.4	116354
481000000000	8541.01	34352	23133.2	21799	28819.1	69603.1	42703.4	83305.9	116509
482000000000	8540.72	34370.2	23001	21753.8	28860.7	69721	42742.3	83322.1	116550
483000000000	8573.82	34323.8	23053.7	21895	28804.5	69583.8	42724.8	83349.6	116634
484000000000	8570.95	34370.8	23116.8	21774.5	28702.6	69656.5	42706.1	83246.8	116531
485000000000	8545.66	34505.2	23024.1	21719.7	28726.7	69652.2	42728.5	83439.5	116334
486000000000	8568.86	34425.2	23042.7	21802.9	28827.4	69589.9	42757.1	83200.4	116453
487000000000	8556.98	34422.3	23142.7	21797.1	28720.2	69457.5	42755.8	83349.8	116295
488000000000	8559.56	34336.5	23058.9	21779	28798.3	69611.4	42701.7	83285.9	116286
489000000000	8528.6	34442.2	23045.5	21712.6	28798.5	69539.1	42684.8	83314.9	116306
490000000000	8533.95	34316	23007.9	21764	28750.8	69686.5	42729.8	83489.8	116233
491000000000	8574.21	34348.8	22955.1	21833.9	28742.2	69603.9	42650.3	83267.9	116344
492000000000	8577.88	34429	22995.8	21694.6	28843.4	69464.4	42668.2	83372.7	116202
493000000000	8569.97	34380.4	23028.3	21764.6	28863.4	69594.9	42877.5	83362.9	116307
494000000000	8598.22	34466.2	23075	21777.7	28813.5	69574.8	42837	83325.1	116443
495000000000	8554.72	34384.4	23032.1	21871.2	28919.2	69553.6	42584.4	83386.7	116296
496000000000	8607.84	34370.4	23012	21833.6	28849.9	69492.5	42725.8	83265.6	116226
497000000000	8555.29	34524.4	23030.7	21654.6	28835.6	69661.7	42755.9	83209.6	116262
498000000000	8514.82	34304.6	23065.4	21703.4	28640.7	69723.6	42709.9	83163	116132
499000000000	8587.38	34378.3	22991.2	21789.2	28739.3	69625.2	42676.4	83121.7	116146
500000000000	8522.7	34232.6	23061.4	21732.7	28730.2	69454.9	42635.2	83409.8	116113
501000000000	8508.53	34346.2	23040.2	21818.6	28771.8	69436.6	42529.3	83277.8	116173
502000000000	8539.07	34402.6	23039.9	21833.4	28709.3	69536.8	42754.3	83193.4	116144
503000000000	8558.67	34352.8	23089.4	21894.2	28684.8	69590.7	42695.5	83297.2	116171
504000000000	8553.04	34282.4	23053.8	21812.3	28828.9	69492.4	42695.4	83240.7	116229
505000000000	8610.26	34379.9	22926.8	21744.6	28796.8	69472	42686.4	83228	116011
506000000000	8501.52	34279.6	23048.4	21843.5	28690.1	69531.1	42640	83410.9	115971
507000000000	8573.94	34441.6	23026.4	21762.2	28767	69461.9	42648.4	83129.5	116061
508000000000	8588.88	34366.8	23040.1	21759.5	28817.8	69390.3	42594.4	83258.9	116174
509000000000	8519.72	34475.4	23028.5	21752.1	28886.1	69451.4	42691.3	83046.7	116065
510000000000	8576.51	34382	23111.2	21740.8	28777.9	69488.9	42719	83142.2	116025
511000000000	8507.31	34308.7	23092.8	21722.2	28768.7	69407.4	42583.9	83326.7	116027
512000000000	8531.25	34414.8	22977.4	21734.2	28788.4	69629.2	42599.4	83177.4	115838
513000000000	8516.87	34356.4	23022.6	21826	28714.8	69509.3	42602.7	83183.9	116125
514000000000	8549.88	34410.2	23064.2	21835.3	28728.3	69329	42634.3	83212.7	116016
515000000000	8548.18	34367	23040.2	21741.3	28754.4	69496.1	42705.5	83283.2	115897
516000000000	8558.52	34266.1	23124.1	21742.3	28744.8	69521.1	42567	83139.8	116174
517000000000	8605.13	34265.6	23090.4	21709.1	28718.9	69349.6	42603.2	83209.5	115959
518000000000	8565.08	34344.5	22970.2	21771.8	28711.9	69520.2	42639.9	83218.6	115915
519000000000	8544.12	34319.3	23025.8	21760.2	28804.8	69528.9	42631.1	83178.2	116043
520000000000	8569.78	34361.3	23051.3	21703.5	28790	69368	42491.7	83166.9	116192
521000000000	8521.55	34289.4	23057.7	21720	28775.7	69359.1	42609.1	83262.7	115781
522000000000	8603.88	34287	23089	21742.5	28734	69453.8	42621	83054.5	115843
523000000000	8519.38	34234.1	23027.4	21675.2	28734.9	69372.9	42630.6	83189.1	115950
524000000000	8564.11	34238.9	23113.5	21742.3	28748.4	69364.7	42408.8	83135.2	116107
525000000000	8528.29	34358.5	23021.8	21761.3	28803.6	69479.4	42584	83141.9	115824
526000000000	8551.62	34266.8	23101.3	21770.2	28821.6	69352.3	42647.2	83119.5	115859
527000000000	8532.62	34301.6	23037.6	21772.1	28827.4	69377.8	42618.8	83189.2	115726
528000000000	8538.28	34346.5	23018.5	21651.5	28762.2	69320	42498.4	83297.9	115657
529000000000	8566.79	34360.6	22985.4	21744.7	28778	69426.7	42526.7	82940.2	115816
530000000000	8615.36	34450	23065.6	21775.6	28767.3	69259.2	42642.6	82922.2	115971
531000000000	8549.71	34382.7	23001.9	21806.5	28792.1	69440.8	42534.5	83101.4	115779
532000000000	8542.39	34321.6	23139	21664.2	28700.9	69498.1	42630.2	83151.2	115735
533000000000	8499.53	34305.3	23076.6	21727.9	28750.7	69375	42475.7	83019.1	115848
534000000000	8564.06	34343.9	22980.1	21749.9	28770.2	69347.7	42524.3	82934.2	115731
535000000000	8495.47	34153.5	23027.5	21692	28682.1	69191.8	42554.8	83019.1	115872
536000000000	8492.46	34290.4	23017.5	21776.5	28645.8	69328.9	42623.2	83216	115740
537000000000	8522.6	34251.4	23068.2	21728.7	28731	69390.8	42641.5	83025.2	115625
538000000000	8574.47	34408	23016.6	21745.3	28649.6	69400.4	42437.2	83274.9	115792
539000000000	8441.79	34310.8	23069.2	21722.6	28735.5	69392.2	42682.3	83075.6	115662
540000000000	8522.67	34276.5	23042.5	21718.4	28738.2	69393.3	42587.7	82930.8	115639
541000000000	8557.83	34252.3	23089.2	21837	28763.9	69349	42713.1	83027	115454
542000000000	8587.85	34308.6	22985.7	21660.5	28650.2	69348.1	42600.1	83118.1	115593
543000000000	8564.45	34248.1	22994.4	21774.3	28719.4	69434.1	42686.3	83105.7	115626
544000000000	8564.36	34342.3	22934.7	21736.8	28792.2	69251.6	42481.1	83167.1	115696
545000000000	8557.66	34298.8	23078	21663.2	28682.4	69283.8	42672.5	83212.2	115580
546000000000	8533.9	34328	23049.4	21710	28750	69451.3	42502.5	83041.7	115629
547000000000	8555.85	34291.8	23018.3	21705.4	28750.4	69258.2	42620.9	82755	115581
548000000000	8553.25	34248.4	23034.6	21732.1	28636	69404.9	42526.7	83079.4	115813
549000000000	8477.91	34232.8	22968.6	21717.7	28766.8	69495.4	42528.6	83057.5	115654
550000000000	8535.04	34152.9	22981.6	21651.3	28756.1	69468	42593.9	83162.5	115624
551000000000	8526.4	34390.3	22946.4	21688.8	28720.1	69292.6	42567.7	83053.8	115551
552000000000	8515.75	34388.9	23029.7	21759.9	28874.2	69358	42406.6	82946.6	115481
553000000000	8583.9	34224.1	22942.2	21765.5	28716.9	69149.1	42504.3	82973.9	115574
554000000000	8532.74	34334.6	22990.7	21774.5	28725.2	69252.1	42547.4	83006.3	115597
555000000000	8543.34	34204.5	23041.7	21843.2	28740	69302.5	42526.3	82943.1	115535
556000000000	8540.35	34269.6	23042.4	21825.7	28787	69387.1	42578.8	82907.7	115496
557000000000	8520.37	34305.3	23010.5	21590.9	28676.3	69269.1	42494.7	82842.3	115278
558000000000	8555.33	34263.8	23006.2	21696.6	28802.5	69279.3	42455.8	82828.4	115684
559000000000	8534.38	34206.6	23082	21743.7	28570.3	69162.8	42600.8	82835.8	115514
560000000000	8510.22	34205	22955.2	21705.5	28703.7	69055.8	42575.5	83167	115680
561000000000	8563.39	34246.3	23019.9	21746.8	28621.6	69233	42613.5	82915.2	115577
562000000000	8486.93	34297	23053.5	21697.6	28714.1	69256.2	42594.6	82945.7	115519
563000000000	8548.31	34241	23041	21738.3	28722.7	69177.3	42592.1	83017.7	115354
564000000000	8484.67	34282.1	22997.3	21711.9	28682	69181.2	42402	82936.4	115723
565000000000	8531.49	34257.4	23102	21717.5	28705.5	69079.9	42558.8	82967.6	115429
566000000000	8505.29	34152.7	23029.9	21671.8	28664	69127.7	42592.9	83081.4	115473
567000000000	8534.7	34202.6	22965.6	21760.2	28683.5	69137.4	42466.6	83051.2	115290
568000000000	8582.36	34276.4	23014.4	21749.2	28690.5	69139.1	42425.2	82872.8	115251
569000000000	8532.63	34162.7	22879.8	21693.7	28697	69302.9	42451.8	82912.7	115379
570000000000	8628.26	34262.7	23075.6	21738.6	28812.1	69096.8	42428.4	82675.3	115498
571000000000	8518.64	34305.2	22996	21709.2	28726.8	69232.6	42498	82873.4	115315
572000000000	8446.59	34237.2	22988.4	21671.3	28566.1	69136.4	42474.4	82911	115325
573000000000	8537.59	34330.2	23000.3	21732.6	28764.2	69072.3	42499.3	82760	115168
574000000000	8522.92	34166.3	23037.6	21728.5	28627.6	69078.3	42413.6	82831.6	115306
575000000000	8571.04	34220.2	22989.8	21723.8	28599.5	69127.9	42573.2	82889.1	115258
576000000000	8517.63	34222.8	22951.2	21721.4	28659	69150.5	42339.6	82794.2	115354
577000000000	8545.07	34294.1	22901.1	21622	28668.5	69077.3	42456.2	82838.2	115187
578000000000	8462.69	34185.2	23006.8	21724.7	28708.5	69243.5	42480.9	82774.7	115186
579000000000	8557.31	34315.7	23015	21656.9	28586.4	69146.8	42427.8	82912.3	115300
580000000000	8538.82	34275.2	22982.2	21734	28606.5	69176.7	42379.3	82793	115147
581000000000	8481.03	34293.1	23054.8	21723	28713.8	69015.5	42508	82885.7	115332
582000000000	8516.78	34173.1	23051.2	21643.4	28758.9	69131.5	42486.6	82772.8	115145
583000000000	8554.83	34218.6	23011.1	21767.1	28603.1	69066.4	42580.7	82765.2	115106
584000000000	8552.46	34250.1	22943.9	21783.9	28584.5	69295.1	42513.5	82892	115200
585000000000	8533.29	34245.5	23008.5	21590.6	28673.1	69158.1	42413.4	82733.5	114995
586000000000	8474.03	34175.2	22993.7	21680.3	28595	68943	42422.8	82830.9	115306
587000000000	8546.41	34241.9	22981.9	21670.9	28668.3	69029.3	42400.6	82753.2	115208
588000000000	8514.81	34141	23014.5	21656.8	28601.3	69012.6	42561.4	82921.8	115066
589000000000	8463.02	34281.6	23005.9	21748.2	28648.2	68968.5	42555.8	82875.4	115121
590000000000	8508.77	34241.5	23037.4	21645.8	28641.1	69150.8	42469.8	82881	115241
591000000000	8568.3	34164.3	22954.3	21764.7	28689.9	69088	42484	82739.8	115300
592000000000	8485.5	34273.4	23065.6	21649.5	28607.8	69056	42423.3	82721.6	114989
593000000000	8501.78	34221.2	23003.3	21650.9	28679.5	69107.1	42466	82657.7	115055
594000000000	8522.24	34309	22935.6	21722.2	28720.4	69137.3	42562.5	82805.8	115168
595000000000	8476.93	34197.1	22923.8	21619.4	28632.7	68920	42416.4	82606.7	115197
596000000000	8521.91	34250.8	23008.4	21683	28694.8	68982.5	42499.4	82677.2	115102
597000000000	8495.2	34257.3	23028.7	21677.2	28604.4	68977.3	42363.9	82878.1	114914
598000000000	8538.07	34215.3	22918.6	21618.2	28674.8	69054.6	42410.3	82802.4	115104
599000000000	8509.45	34224.3	22982.2	21681.2	28551.3	68917.7	42277	82692.6	115017
600000000000	8526.31	34212.7	23019.6	21595	28501.5	68970.9	42429.1	82670.8	115141

## Sheet: Sheet1
Time	Control	0.65uM	1.30uM	2.60uM	5.20uM	10.41uM	20.83uM	41.66uM	83.33uM													Time	Control	0.65uM	1.30uM	2.60uM	5.20uM	10.41uM	20.83uM	41.66uM	83.33uM
0	9213.88	36376.5	24967.8	22693.2	30700.8	76333.6	47760.8	93550.5	129609													0	92.1388	363.765	249.678	226.932	307.008	763.336	477.608	935.505	1296.09
1	9279.59	36228.6	24970.9	22706.9	30720	76208.9	47747.4	93335.3	129520													1	92.7959	362.286	249.709	227.069	307.2	762.089	477.474	933.353	1295.2
2	9168.83	36365.6	25050.8	22633.5	30730.2	75965.4	47719.1	93149.8	129369													2	91.6883	363.656	250.508	226.335	307.302	759.654	477.191	931.498	1293.69
3	9239.7	36281.5	24883.6	22685.3	30650	76096.3	47470.2	93076.3	129164													3	92.397	362.815	248.836	226.853	306.5	760.963	474.702	930.763	1291.64
4	9165.12	36269	24909.5	22645.3	30694	75906.6	47443.4	92956	129207													4	91.6512	362.69	249.095	226.453	306.94	759.066	474.434	929.56	1292.07					POPS	F450
5	9204.05	36373.6	25010.5	22508	30657.2	75778.1	47460.2	92929.6	128588													5	92.0405	363.736	250.105	225.08	306.572	757.781	474.602	929.296	1285.88					0	85.2631
6	9173.38	36252.7	25039.2	22583.1	30649.2	75986	47460.6	93052.8	128489													6	91.7338	362.527	250.392	225.831	306.492	759.86	474.606	930.528	1284.89					0.56	342.127
7	9149.72	36163.8	25042.9	22513.5	30601.6	75727.4	47440	92908.2	128407													7	91.4972	361.638	250.429	225.135	306.016	757.274	474.4	929.082	1284.07					1.3	230.196
8	9189.88	36237.2	24841	22450.2	30673.5	75752.3	47261.3	92739.9	128466													8	91.8988	362.372	248.41	224.502	306.735	757.523	472.613	927.399	1284.66					2.6	215.95
9	9120.57	36313	24963.8	22475.2	30528.1	75683.6	47185.9	92832.7	128130													9	91.2057	363.13	249.638	224.752	305.281	756.836	471.859	928.327	1281.3					5.2	285.015
10	9134.81	36294.2	24880.2	22501.1	30693.1	75571.4	47214.2	92543.4	128128													10	91.3481	362.942	248.802	225.011	306.931	755.714	472.142	925.434	1281.28					10.41	689.709
11	9134.64	36199.2	24904.5	22428.5	30571.3	75699.9	47259.7	92581.5	128029													11	91.3464	361.992	249.045	224.285	305.713	756.999	472.597	925.815	1280.29					20.83	424.291
12	9179.56	36165.6	24914.1	22541.5	30480.7	75439.1	47250.1	92633.6	127754													12	91.7956	361.656	249.141	225.415	304.807	754.391	472.501	926.336	1277.54					41.66	826.708
13	9148.82	36154.4	24915.2	22382	30485.4	75458.7	47110.7	92440.6	127759													13	91.4882	361.544	249.152	223.82	304.854	754.587	471.107	924.406	1277.59					83.3	1151.41
14	9129.05	36196.9	24864.3	22348.4	30433.3	75594	47135.1	92434.7	127604													14	91.2905	361.969	248.643	223.484	304.333	755.94	471.351	924.347	1276.05
15	9092.95	36289	24916.3	22385.7	30359.8	75481	47296.8	92300.6	127618													15	90.9295	362.89	249.163	223.857	303.598	754.81	472.968	923.006	1276.18
16	9086.19	36184.7	24944.5	22475.1	30449.7	75507.5	46994.7	92415	127486													16	90.8619	361.847	249.445	224.751	304.497	755.075	469.947	924.15	1274.86
17	9092.08	36149.7	24826.7	22393.1	30488.7	75513.9	47129.2	92115	127571													17	90.9208	361.497	248.267	223.931	304.887	755.139	471.292	921.15	1275.71
18	9085.72	36119.6	24754.1	22384.3	30378.2	75182	46934.7	92399.7	127427													18	90.8572	361.196	247.541	223.843	303.782	751.82	469.347	923.997	1274.27
19	9095.12	36111.3	24845.6	22346.1	30502.5	75260.8	46936.3	92155.6	127371													19	90.9512	361.113	248.456	223.461	305.025	752.608	469.363	921.556	1273.71
20	9150.36	36092.8	24781.8	22299.8	30390.5	75282.2	47028.8	92043.6	127163													20	91.5036	360.928	247.818	222.998	303.905	752.822	470.288	920.436	1271.63
21	9114.41	36215.8	24922.7	22319.4	30469.4	75105.4	47019.1	92255.4	127202													21	91.1441	362.158	249.227	223.194	304.694	751.054	470.191	922.554	1272.02
22	9055.8	36121.1	24799.8	22275.1	30425.8	75360.5	46856.1	92007.4	127002													22	90.558	361.211	247.998	222.751	304.258	753.605	468.561	920.074	1270.02
23	9051.29	36039.3	24745.1	22282.8	30288.4	75310	46921.4	91986.1	127401													23	90.5129	360.393	247.451	222.828	302.884	753.1	469.214	919.861	1274.01
24	9067.38	36175.4	24776.4	22291.5	30340.6	75162.4	46985.2	91966.9	127244													24	90.6738	361.754	247.764	222.915	303.406	751.624	469.852	919.669	1272.44
25	9069.54	36150.9	24745.7	22214.6	30330.1	75387.2	46817.7	91945.7	127265													25	90.6954	361.509	247.457	222.146	303.301	753.872	468.177	919.457	1272.65
26	9115.19	36096.1	24747.8	22271.6	30329.7	75124.7	46824.2	91795.5	127116													26	91.1519	360.961	247.478	222.716	303.297	751.247	468.242	917.955	1271.16
27	9071	36075	24771.1	22111.2	30375.8	75016.9	46814.5	91947	127158													27	90.71	360.75	247.711	221.112	303.758	750.169	468.145	919.47	1271.58
28	9074.14	36207.2	24722.2	22223.1	30291.7	75044.9	46860.4	91651.5	126985													28	90.7414	362.072	247.222	222.231	302.917	750.449	468.604	916.515	1269.85
29	9121.71	36083	24713.7	22251.4	30338.9	75057.4	46821.9	91841.7	127197													29	91.2171	360.83	247.137	222.514	303.389	750.574	468.219	918.417	1271.97
30	9093.38	36061.8	24722.1	22175.6	30242.4	75041	46868	91821	126923													30	90.9338	360.618	247.221	221.756	302.424	750.41	468.68	918.21	1269.23
31	9062.14	35879.6	24761.9	22180.5	30310.8	75071.5	46772.9	91815.4	126644													31	90.6214	358.796	247.619	221.805	303.108	750.715	467.729	918.154	1266.44
32	9029.68	36081.4	24832.4	22269.9	30243.2	74898.2	46827.7	91613	126816													32	90.2968	360.814	248.324	222.699	302.432	748.982	468.277	916.13	1268.16
33	9085.84	35931.5	24643	22205.4	30364.8	75032	46599	91429.1	126731													33	90.8584	359.315	246.43	222.054	303.648	750.32	465.99	914.291	1267.31
34	9060.67	36055	24777.9	22069.5	30351.1	74831.1	46614.8	91670.1	126723													34	90.6067	360.55	247.779	220.695	303.511	748.311	466.148	916.701	1267.23
35	9046.19	35916.9	24677.2	22249.4	30328.7	74778.7	46661.8	91468.4	126695													35	90.4619	359.169	246.772	222.494	303.287	747.787	466.618	914.684	1266.95
36	9070.5	36081.3	24613.2	22154.6	30322.9	74699.2	46686.3	91312.6	126773													36	90.705	360.813	246.132	221.546	303.229	746.992	466.863	913.126	1267.73
37	9015.9	36186.4	24662.4	22191.5	30129.2	74820.2	46492.6	91261.2	126723													37	90.159	361.864	246.624	221.915	301.292	748.202	464.926	912.612	1267.23
38	9086.37	36074.6	24538.4	22163.2	30160	74649.5	46551.2	91152.6	126650													38	90.8637	360.746	245.384	221.632	301.6	746.495	465.512	911.526	1266.5
39	9070.55	36026.2	24678.9	22158.1	30148.1	74591.6	46650	91280.4	126199													39	90.7055	360.262	246.789	221.581	301.481	745.916	466.5	912.804	1261.99
40	8928.24	35933.6	24663.1	22123.5	30181.7	74679.1	46561.1	91259.3	126449													40	89.2824	359.336	246.631	221.235	301.817	746.791	465.611	912.593	1264.49
41	9013.24	35945.1	24661.6	22161.4	30121	74672.6	46694.2	91091.7	126322													41	90.1324	359.451	246.616	221.614	301.21	746.726	466.942	910.917	1263.22
42	9082.7	36012.3	24577.3	22081.6	30159.5	74523.2	46426.5	91086.8	126080													42	90.827	360.123	245.773	220.816	301.595	745.232	464.265	910.868	1260.8
43	9010.15	36037.6	24546	22032.2	30256.3	74487.5	46537.8	91027.2	126370													43	90.1015	360.376	245.46	220.322	302.563	744.875	465.378	910.272	1263.7
44	9008.28	35941.2	24519.8	22117	30177.3	74469.6	46528.2	90876.7	126230													44	90.0828	359.412	245.198	221.17	301.773	744.696	465.282	908.767	1262.3
45	9012.25	35917.3	24590.2	22130.4	30174.8	74488.4	46306	90847.9	126103													45	90.1225	359.173	245.902	221.304	301.748	744.884	463.06	908.479	1261.03
46	9021.63	36021.7	24643.8	22163.4	30076.6	74329.3	46451.3	90805.6	126108													46	90.2163	360.217	246.438	221.634	300.766	743.293	464.513	908.056	1261.08
47	9023.83	35956.7	24420.5	22061.4	30123	74435.5	46520.8	90761.2	126189													47	90.2383	359.567	244.205	220.614	301.23	744.355	465.208	907.612	1261.89
48	9036.53	35906.5	24515.9	22106.8	30092.3	74385.4	46420.2	90881.6	125891													48	90.3653	359.065	245.159	221.068	300.923	743.854	464.202	908.816	1258.91
49	9046.64	35954.9	24588.2	22197.3	30106.2	74297.2	46297.3	90649.8	125874													49	90.4664	359.549	245.882	221.973	301.062	742.972	462.973	906.498	1258.74
50	8994.49	35988.1	24452.1	22047.5	30101.3	74383.7	46186.5	90703.5	125705													50	89.9449	359.881	244.521	220.475	301.013	743.837	461.865	907.035	1257.05
51	9042.94	35836.8	24492.3	22015.4	30059.7	74275.9	46288	90559.7	125755													51	90.4294	358.368	244.923	220.154	300.597	742.759	462.88	905.597	1257.55
52	9011.42	35997.9	24400.6	22094.1	30014.4	74268.7	46220.5	90802.3	125725													52	90.1142	359.979	244.006	220.941	300.144	742.687	462.205	908.023	1257.25
53	9002.75	35961.8	24500.4	21972.6	30081.5	74136	46246.7	90539.8	125560													53	90.0275	359.618	245.004	219.726	300.815	741.36	462.467	905.398	1255.6
54	9016.07	36001.8	24542.6	22076.2	30032.9	74252.9	46268.8	90424.2	125490													54	90.1607	360.018	245.426	220.762	300.329	742.529	462.688	904.242	1254.9
55	8976.33	35878.6	24466.6	22004.5	30147.1	74247.4	46269.7	90430.1	125381													55	89.7633	358.786	244.666	220.045	301.471	742.474	462.697	904.301	1253.81
56	9016.62	35992.1	24495.5	22057.5	29978.3	74216.5	46243.5	90455.8	125530													56	90.1662	359.921	244.955	220.575	299.783	742.165	462.435	904.558	1255.3
57	8999.39	35984.1	24395.7	22070.4	29906	74217	46175.5	90644.8	125426													57	89.9939	359.841	243.957	220.704	299.06	742.17	461.755	906.448	1254.26
58	9008.27	35921.7	24505.2	22000.3	30007.5	74314.7	46203.5	90600.6	125473													58	90.0827	359.217	245.052	220.003	300.075	743.147	462.035	906.006	1254.73
59	8995.41	35848.6	24401.7	21959.9	29923	74016.1	46263.3	90234.5	125152													59	89.9541	358.486	244.017	219.599	299.23	740.161	462.633	902.345	1251.52
60	8941.13	35843.5	24589.7	22004.9	29911.4	74121.9	46234.7	90481	125302													60	89.4113	358.435	245.897	220.049	299.114	741.219	462.347	904.81	1253.02
61	8938.86	35734.8	24382.5	22177.2	29915.5	74219.6	46119.7	90147.7	125208													61	89.3886	357.348	243.825	221.772	299.155	742.196	461.197	901.477	1252.08
62	8965.67	35895.3	24356.5	21988.5	30005.8	74240.4	46165.7	90392.4	125273													62	89.6567	358.953	243.565	219.885	300.058	742.404	461.657	903.924	1252.73
63	8976.72	35871	24318.8	21971.4	29951.2	74001.8	46090.7	90399.3	124935													63	89.7672	358.71	243.188	219.714	299.512	740.018	460.907	903.993	1249.35
64	8999.58	35975.2	24380.1	22041.6	29873.7	74135	46150.3	90143.9	125070													64	89.9958	359.752	243.801	220.416	298.737	741.35	461.503	901.439	1250.7
65	8989.08	35896.6	24375.4	21993.3	29884.3	73983.9	46142.1	90369.3	124965													65	89.8908	358.966	243.754	219.933	298.843	739.839	461.421	903.693	1249.65
66	8904.79	35840.6	24501.2	22070.3	29948.9	73887.6	46002.3	90132.6	124990													66	89.0479	358.406	245.012	220.703	299.489	738.876	460.023	901.326	1249.9
67	8952.67	35851.1	24421.1	22066.8	29910.8	73955.6	46028.4	89980.9	124744													67	89.5267	358.511	244.211	220.668	299.108	739.556	460.284	899.809	1247.44
68	8925.62	35876.7	24339.2	22095.8	29927.2	73819.3	46037.7	90133.5	124951													68	89.2562	358.767	243.392	220.958	299.272	738.193	460.377	901.335	1249.51
69	9011.86	35778.9	24304.2	21991.2	29879.8	73927.6	45935.9	90118.7	124769													69	90.1186	357.789	243.042	219.912	298.798	739.276	459.359	901.187	1247.69
70	8954.23	35873.9	24322.9	22010.3	29857.2	73782.2	45835.9	89764.1	124893													70	89.5423	358.739	243.229	220.103	298.572	737.822	458.359	897.641	1248.93
71	8989.79	35799.4	24368	22080.6	29950.4	73926.9	45858.6	89943.2	124824													71	89.8979	357.994	243.68	220.806	299.504	739.269	458.586	899.432	1248.24
72	8934.89	35731.4	24292.3	22078.6	29957.7	73883.3	45876.8	89988.3	124612													72	89.3489	357.314	242.923	220.786	299.577	738.833	458.767	899.883	1246.12
73	8907.58	35896.6	24258.6	22035.6	29870.1	73792.1	45966.2	89877.2	124438													73	89.0758	358.966	242.586	220.356	298.701	737.921	459.662	898.772	1244.38
74	8974.58	35772.1	24252.8	22034.4	29883.6	73678.4	45878.9	89914.7	124559													74	89.7458	357.721	242.528	220.344	298.836	736.784	458.789	899.147	1245.59
75	9017.63	35851.2	24330.2	22005	29964.3	73780.6	45869.6	89739.2	124522													75	90.1763	358.512	243.302	220.05	299.643	737.806	458.696	897.392	1245.22
76	8959.78	35776.4	24201.2	21997	29854.6	73556.5	45896.5	89749.8	124412													76	89.5978	357.764	242.012	219.97	298.546	735.565	458.965	897.498	1244.12
77	8978.34	35761	24285.2	22043.2	29868.4	73617.9	45835.2	89669.3	124450													77	89.7834	357.61	242.852	220.432	298.684	736.179	458.352	896.693	1244.5
78	8898.83	35757.2	24262.8	22089.1	29755	73622.9	45729.5	89622.3	124407													78	88.9883	357.572	242.628	220.891	297.55	736.229	457.295	896.223	1244.07
79	8956.53	35782.4	24123.4	22006.3	29858.4	73608.9	45799.2	89673.4	124333													79	89.5653	357.824	241.234	220.063	298.584	736.089	457.992	896.734	1243.33
80	8894.74	35753	24234.6	22126.2	29818.7	73448.2	45840	89657.2	124350													80	88.9474	357.53	242.346	221.262	298.187	734.482	458.4	896.572	1243.5
81	8943.24	35673.2	24234.9	21967.9	29854.8	73662	45735.2	89669.7	124073													81	89.4324	356.732	242.349	219.679	298.548	736.62	457.352	896.697	1240.73
82	8893.44	35715	24216	22080.8	29825.7	73529.4	45742	89489.5	124329													82	88.9344	357.15	242.16	220.808	298.257	735.294	457.42	894.895	1243.29
83	8934.38	35800.7	24257.3	22065.9	29712.6	73591.5	45830.2	89537.3	124106													83	89.3438	358.007	242.573	220.659	297.126	735.915	458.302	895.373	1241.06
84	8887.49	35707.4	24169.9	22087.3	29780.5	73495.8	45656.6	89373.9	124081													84	88.8749	357.074	241.699	220.873	297.805	734.958	456.566	893.739	1240.81
85	8878.01	35593.5	24089.9	21987	29678.5	73531.5	45649.9	89527.7	124064													85	88.7801	355.935	240.899	219.87	296.785	735.315	456.499	895.277	1240.64
86	8891.62	35744.6	24218.3	21971.5	29682	73393	45789.8	89399.9	123936													86	88.9162	357.446	242.183	219.715	296.82	733.93	457.898	893.999	1239.36
87	8876.83	35790.2	24044.9	22108.5	29801.7	73334.1	45814.9	89496.1	124075													87	88.7683	357.902	240.449	221.085	298.017	733.341	458.149	894.961	1240.75
88	8875.07	35751.6	24201.6	22087.9	29787.3	73415.7	45621.6	89521.3	123845													88	88.7507	357.516	242.016	220.879	297.873	734.157	456.216	895.213	1238.45
89	8890.02	35759.3	24210.9	22086.5	29723.5	73320.2	45714.7	89390.6	123838													89	88.9002	357.593	242.109	220.865	297.235	733.202	457.147	893.906	1238.38
90	8878.31	35749	24119	22094.3	29695.1	73406.5	45679.7	89279.5	123941													90	88.7831	357.49	241.19	220.943	296.951	734.065	456.797	892.795	1239.41
91	8920.75	35744.7	24046.5	22018.8	29794.4	73317	45627.1	89275.2	123740													91	89.2075	357.447	240.465	220.188	297.944	733.17	456.271	892.752	1237.4
92	8871.68	35575.9	24169.6	22004.8	29734	73235.7	45548.9	89287.5	123608													92	88.7168	355.759	241.696	220.048	297.34	732.357	455.489	892.875	1236.08
93	8885.13	35696.2	24180.2	22062.1	29804.3	73209.6	45528.7	89240.3	123760													93	88.8513	356.962	241.802	220.621	298.043	732.096	455.287	892.403	1237.61
94	8891.61	35643	24047.6	22016.7	29794	73142.7	45516.6	89145	123492													94	88.9161	356.43	240.476	220.167	297.94	731.427	455.166	891.45	1234.92
95	8894.5	35604.4	24131.8	21977	29821.4	73238.3	45597.9	89272.1	123471													95	88.945	356.044	241.318	219.77	298.214	732.383	455.979	892.721	1234.71
96	8928.75	35658.9	24108.2	22009.6	29849.8	73166.7	45506.6	88971.2	123817													96	89.2875	356.589	241.082	220.096	298.498	731.667	455.066	889.712	1238.17
97	8870.94	35582.2	24176.4	21958.7	29685.6	73143.3	45637.1	89025.7	123513													97	88.7094	355.822	241.764	219.587	296.856	731.433	456.371	890.257	1235.13
98	8853.95	35709.3	24110.2	22045	29794.4	73161	45447.7	89065.2	123492													98	88.5395	357.093	241.102	220.45	297.944	731.61	454.477	890.652	1234.92
99	8909.84	35587.6	24014.6	21946.8	29713.3	73296.4	45530.4	88881.2	123189													99	89.0984	355.876	240.146	219.468	297.133	732.964	455.304	888.812	1231.89
100	8884.21	35713.5	24017.2	22001.3	29648.9	73041.5	45635.5	89088.7	123460													100	88.8421	357.135	240.172	220.013	296.489	730.415	456.355	890.887	1234.6
101	8871.64	35566.6	24083.4	22076.9	29708.5	73077.3	45601	89063.7	123601													101	88.7164	355.666	240.834	220.769	297.085	730.773	456.01	890.637	1236.01
102	8812.53	35652.7	24030.3	22055.5	29747.2	73149	45465.4	88955.4	123320													102	88.1253	356.527	240.303	220.555	297.472	731.49	454.654	889.554	1233.2
103	8875.26	35515.5	23993.8	21990.7	29630.2	72998.5	45429.3	89034.5	123194													103	88.7526	355.155	239.938	219.907	296.302	729.985	454.293	890.345	1231.94
104	8909.96	35593.3	24009.7	22049.2	29622.4	73003.6	45460.6	88941.6	123251													104	89.0996	355.933	240.097	220.492	296.224	730.036	454.606	889.416	1232.51
105	8796.2	35617.5	23975.5	22027.4	29634	72931.4	45365.3	88748.9	123264													105	87.962	356.175	239.755	220.274	296.34	729.314	453.653	887.489	1232.64
106	8834.17	35606.2	23998.5	22003.3	29665	73170.5	45359	88884	123264													106	88.3417	356.062	239.985	220.033	296.65	731.705	453.59	888.84	1232.64
107	8915.1	35656.9	24015.9	22035.8	29712.4	72758.3	45353.6	88751.4	123026													107	89.151	356.569	240.159	220.358	297.124	727.583	453.536	887.514	1230.26
108	8867.11	35588	24001.2	21987.9	29647	73038.9	45423.2	88888.1	123071													108	88.6711	355.88	240.012	219.879	296.47	730.389	454.232	888.881	1230.71
109	8852.87	35475.7	23913.1	22107.5	29734.1	73026.8	45505	88777.3	123192													109	88.5287	354.757	239.131	221.075	297.341	730.268	455.05	887.773	1231.92
110	8846.83	35641.4	23944.1	22062.9	29622.9	72895	45315.3	88688.7	122952													110	88.4683	356.414	239.441	220.629	296.229	728.95	453.153	886.887	1229.52
111	8879.35	35575.8	24007.6	22025	29602.2	73038.9	45427.2	88816.2	123000													111	88.7935	355.758	240.076	220.25	296.022	730.389	454.272	888.162	1230
112	8865.01	35550.8	23919.7	22064.9	29685.9	72755.6	45362.9	88659.3	122877													112	88.6501	355.508	239.197	220.649	296.859	727.556	453.629	886.593	1228.77
113	8841.49	35543.6	23973.7	22120.1	29672.4	72947.3	45348.4	88652	122743													113	88.4149	355.436	239.737	221.201	296.724	729.473	453.484	886.52	1227.43
114	8890.73	35458.3	23962.2	21989.3	29596.1	73002.9	45198.1	88614.4	122958													114	88.9073	354.583	239.623	219.893	295.961	730.029	451.981	886.144	1229.58
115	8904.31	35388.9	24030.4	21994.4	29840.4	72681.7	45264.6	88647.7	122612													115	89.0431	353.889	240.304	219.944	298.404	726.817	452.646	886.477	1226.12
116	8789.6	35532.5	23968.3	21962.4	29623	72820.4	45102.1	88435.1	122496													116	87.896	355.325	239.683	219.624	296.23	728.204	451.021	884.351	1224.96
117	8831.05	35450.4	24026.1	22024.1	29604.2	72882.5	45297.1	88461.5	122448													117	88.3105	354.504	240.261	220.241	296.042	728.825	452.971	884.615	1224.48
118	8852.11	35410.5	23881.7	22086.3	29468.5	72941	45111.6	88570.4	122751													118	88.5211	354.105	238.817	220.863	294.685	729.41	451.116	885.704	1227.51
119	8823.88	35568.4	23950.9	22001.2	29686.4	72727.2	45266.5	88414.8	122553													119	88.2388	355.684	239.509	220.012	296.864	727.272	452.665	884.148	1225.53
120	8834.07	35535.3	23856.4	22016.7	29611.6	72871.7	45297.3	88399.5	122293													120	88.3407	355.353	238.564	220.167	296.116	728.717	452.973	883.995	1222.93
121	8854.31	35533.7	23969.1	22046.7	29601.1	72941.6	45226.3	88407.6	122442													121	88.5431	355.337	239.691	220.467	296.011	729.416	452.263	884.076	1224.42
122	8853.28	35413.8	23891.1	22031.6	29620.9	72773.1	45155.1	88448.6	122551													122	88.5328	354.138	238.911	220.316	296.209	727.731	451.551	884.486	1225.51
123	8888.9	35395.9	23984.9	21993.6	29592.6	72826.4	45002.8	88538.9	122419													123	88.889	353.959	239.849	219.936	295.926	728.264	450.028	885.389	1224.19
124	8799.69	35465.1	23809	22164.9	29668.9	72831.4	45214.8	88215.9	122405													124	87.9969	354.651	238.09	221.649	296.689	728.314	452.147	882.159	1224.05
125	8874.19	35580	24026.9	21998.5	29575.8	72724.1	44934.3	88369.7	122319													125	88.7419	355.8	240.269	219.985	295.758	727.241	449.343	883.697	1223.19
126	8847.07	35469.8	23972.7	22104.8	29575	72940.9	45215.7	88352.2	122372													126	88.4707	354.698	239.727	221.048	295.75	729.409	452.157	883.522	1223.72
127	8755.01	35386.7	23810.6	22045.8	29604.1	72514.5	45081.1	88395.3	122448													127	87.5501	353.867	238.106	220.458	296.041	725.145	450.811	883.953	1224.48
128	8781.32	35526.8	23870.1	22061.3	29513.6	72589.9	45078.6	88306.7	122182													128	87.8132	355.268	238.701	220.613	295.136	725.899	450.786	883.067	1221.82
129	8821.43	35449.9	23836.9	22115	29488.9	72730.6	45138.4	88295.7	122191													129	88.2143	354.499	238.369	221.15	294.889	727.306	451.384	882.957	1221.91
130	8802.57	35575.6	23935.9	22066.1	29511.2	72739.6	44993.9	88180.2	122236													130	88.0257	355.756	239.359	220.661	295.112	727.396	449.939	881.802	1222.36
131	8821.79	35439.6	23958.3	22078	29526.8	72448.6	45022.2	88114	122010													131	88.2179	354.396	239.583	220.78	295.268	724.486	450.222	881.14	1220.1
132	8779.48	35398.5	23890.3	22088.4	29414.4	72433.4	44984.9	88200.1	122197													132	87.7948	353.985	238.903	220.884	294.144	724.334	449.849	882.001	1221.97
133	8820.53	35444.2	23861.8	21879.6	29487.1	72554	44994.7	88164.5	122342													133	88.2053	354.442	238.618	218.796	294.871	725.54	449.947	881.645	1223.42
134	8797.86	35481	23816.4	22081.1	29551.3	72434.2	44925.4	88173.7	122238													134	87.9786	354.81	238.164	220.811	295.513	724.342	449.254	881.737	1222.38
135	8847.12	35458.4	23819	22091.8	29633.6	72545.9	44989.6	88034	122076													135	88.4712	354.584	238.19	220.918	296.336	725.459	449.896	880.34	1220.76
136	8769.16	35549.9	23923.6	22051.1	29559.8	72536.3	45020.3	88165.4	122284													136	87.6916	355.499	239.236	220.511	295.598	725.363	450.203	881.654	1222.84
137	8817.46	35330.4	23836	22042.7	29575	72424.2	45013.3	88010.1	121969													137	88.1746	353.304	238.36	220.427	295.75	724.242	450.133	880.101	1219.69
138	8836.76	35340.3	23881.8	22040.2	29491.5	72220	44938.8	88015.3	122138													138	88.3676	353.403	238.818	220.402	294.915	722.2	449.388	880.153	1221.38
139	8811.58	35339.2	23716.6	22057.3	29582.6	72583	44997.5	87928.3	121922													139	88.1158	353.392	237.166	220.573	295.826	725.83	449.975	879.283	1219.22
140	8759.36	35353.5	23824.6	22036.8	29553	72562.3	44940.6	87893.4	121956													140	87.5936	353.535	238.246	220.368	295.53	725.623	449.406	878.934	1219.56
141	8805.18	35288.4	23846.7	22087.7	29519	72591.2	44928.4	88079.8	121805													141	88.0518	352.884	238.467	220.877	295.19	725.912	449.284	880.798	1218.05
142	8832.91	35366	23850.6	21939	29595.6	72484.9	44883.5	87775	122048													142	88.3291	353.66	238.506	219.39	295.956	724.849	448.835	877.75	1220.48
143	8821.36	35310.7	23770.2	22024	29457.9	72412.1	44956.1	87814.6	121792													143	88.2136	353.107	237.702	220.24	294.579	724.121	449.561	878.146	1217.92
144	8789.07	35428.8	23727.9	22073.8	29466.5	72366.2	44800.2	87917.5	121841													144	87.8907	354.288	237.279	220.738	294.665	723.662	448.002	879.175	1218.41
145	8779.8	35422.6	23863.7	22003.9	29490.6	72489	44912	87839	121831													145	87.798	354.226	238.637	220.039	294.906	724.89	449.12	878.39	1218.31
146	8786.63	35321.7	23797.8	22024.7	29516.9	72386.9	44817.7	87869.5	121696													146	87.8663	353.217	237.978	220.247	295.169	723.869	448.177	878.695	1216.96
147	8825.95	35240.4	23745.1	22092.3	29497.4	72409.8	44817.6	87812.2	121718													147	88.2595	352.404	237.451	220.923	294.974	724.098	448.176	878.122	1217.18
148	8861.14	35345.4	23783.4	22036.3	29417.2	72367.2	44945	87784.8	121620													148	88.6114	353.454	237.834	220.363	294.172	723.672	449.45	877.848	1216.2
149	8790.26	35285.9	23735.4	22053.3	29487.9	72421.5	44827.9	87564.7	121766													149	87.9026	352.859	237.354	220.533	294.879	724.215	448.279	875.647	1217.66
150	8787.7	35346.1	23783.7	22017.9	29508.8	72255.1	44848.9	87762	121770													150	87.877	353.461	237.837	220.179	295.088	722.551	448.489	877.62	1217.7
151	8841.14	35375.4	23762.4	22089.8	29507	72419.5	44803.2	87578.9	121551													151	88.4114	353.754	237.624	220.898	295.07	724.195	448.032	875.789	1215.51
152	8850.55	35269.2	23674	22095.6	29488	72258.2	44915.9	87722.2	121761													152	88.5055	352.692	236.74	220.956	294.88	722.582	449.159	877.222	1217.61
153	8799.77	35260.5	23698.4	22154	29421.3	72371.6	44834.8	87564.8	121329													153	87.9977	352.605	236.984	221.54	294.213	723.716	448.348	875.648	1213.29
154	8800.51	35386.1	23761.3	22004.1	29521.3	72303.5	44797.5	87575.3	121399													154	88.0051	353.861	237.613	220.041	295.213	723.035	447.975	875.753	1213.99
155	8756.75	35268.9	23777.9	22142.3	29542	72070.7	44897.2	87436.1	121433													155	87.5675	352.689	237.779	221.423	295.42	720.707	448.972	874.361	1214.33
156	8759.18	35228	23669.4	22021.6	29473	72353.4	44880	87347.8	121362													156	87.5918	352.28	236.694	220.216	294.73	723.534	448.8	873.478	1213.62
157	8855.48	35230.4	23662.6	22051.9	29451.7	72124.8	44792.3	87491.3	121635													157	88.5548	352.304	236.626	220.519	294.517	721.248	447.923	874.913	1216.35
158	8783.97	35235.1	23776.2	22005.6	29428.5	72183.4	44800.9	87384	121496													158	87.8397	352.351	237.762	220.056	294.285	721.834	448.009	873.84	1214.96
159	8778.71	35258.2	23813.7	21858.4	29498.7	72268.2	44681.4	87309.9	121400													159	87.7871	352.582	238.137	218.584	294.987	722.683	446.814	873.099	1214
160	8799.34	35333.4	23729.1	22074.2	29454.6	72162.1	44697.3	87417.9	121524													160	87.9934	353.334	237.291	220.742	294.546	721.621	446.973	874.179	1215.24
161	8776.67	35216.1	23623.5	22009.6	29447.7	72121.5	44660.8	87393.7	121496													161	87.7667	352.161	236.235	220.096	294.477	721.215	446.608	873.937	1214.96
162	8793.59	35297.1	23697.3	21984.9	29437	72295.6	44710.1	87286.2	121388													162	87.9359	352.971	236.973	219.849	294.37	722.956	447.101	872.862	1213.88
163	8769.58	35263	23673.6	22073.2	29392.8	71908	44717.8	87259	121391													163	87.6958	352.63	236.736	220.732	293.928	719.08	447.178	872.59	1213.91
164	8737.19	35380.1	23764.7	22089.8	29514.8	72052.8	44762.6	87431.6	121399													164	87.3719	353.801	237.647	220.898	295.148	720.528	447.626	874.316	1213.99
165	8786.14	35282.8	23664.4	22050.2	29390.5	72331.6	44738.4	87263.7	121427													165	87.8614	352.828	236.644	220.502	293.905	723.316	447.384	872.637	1214.27
166	8805.06	35151.6	23766.6	21967	29443.6	72050.5	44630.1	87131.5	121174													166	88.0506	351.516	237.666	219.67	294.436	720.505	446.301	871.315	1211.74
167	8795.56	35287.9	23695.7	22163.1	29348	72157.7	44638.3	87445.6	121413													167	87.9556	352.879	236.957	221.631	293.48	721.577	446.383	874.456	1214.13
168	8811.64	35227.3	23738.1	22142	29289.5	71962.2	44624.9	87217.1	121430													168	88.1164	352.273	237.381	221.42	292.895	719.622	446.249	872.171	1214.3
169	8785.25	35186.9	23608.2	22040.1	29466.4	72123.3	44548.6	87214.9	121303													169	87.8525	351.869	236.082	220.401	294.664	721.233	445.486	872.149	1213.03
170	8735.82	35189.8	23733	22014.7	29493.5	72358.9	44611	87333.4	120991													170	87.3582	351.898	237.33	220.147	294.935	723.589	446.11	873.334	1209.91
171	8761.04	35138.1	23763.1	22087.3	29265.5	72144.2	44626.9	87086.5	121179													171	87.6104	351.381	237.631	220.873	292.655	721.442	446.269	870.865	1211.79
172	8729.58	35138.9	23789.7	22006.3	29393.1	72011.4	44634.5	87252.6	121021													172	87.2958	351.389	237.897	220.063	293.931	720.114	446.345	872.526	1210.21
173	8759.04	35244.2	23665.2	22029.9	29434	72064.1	44605.8	87017.2	121129													173	87.5904	352.442	236.652	220.299	294.34	720.641	446.058	870.172	1211.29
174	8817.22	35285.8	23718.7	22127.7	29278.1	72080.9	44676.9	87028.7	121196													174	88.1722	352.858	237.187	221.277	292.781	720.809	446.769	870.287	1211.96
175	8766.67	35065.9	23771.2	22038.2	29446.4	72032.2	44516.3	87238.4	120875													175	87.6667	350.659	237.712	220.382	294.464	720.322	445.163	872.384	1208.75
176	8827.95	35269	23670.8	21986.8	29342.5	72070.1	44493.1	87009.1	121099													176	88.2795	352.69	236.708	219.868	293.425	720.701	444.931	870.091	1210.99
177	8742.19	35137	23615	22168	29481	71875.1	44629.2	87008.7	121106													177	87.4219	351.37	236.15	221.68	294.81	718.751	446.292	870.087	1211.06
178	8822.67	35140.4	23701.5	22102.8	29443.1	72088.3	44503.4	87066.2	121080													178	88.2267	351.404	237.015	221.028	294.431	720.883	445.034	870.662	1210.8
179	8786.66	35120.9	23688.4	22046.7	29323.4	71927.5	44593.9	86901.6	120908													179	87.8666	351.209	236.884	220.467	293.234	719.275	445.939	869.016	1209.08
180	8787.52	35237.5	23601.6	22002.9	29371.1	71980.2	44482.7	86883.3	121067													180	87.8752	352.375	236.016	220.029	293.711	719.802	444.827	868.833	1210.67
181	8716.87	35162.1	23629.1	22032.4	29505.4	71964.1	44534.7	86938.5	120824													181	87.1687	351.621	236.291	220.324	295.054	719.641	445.347	869.385	1208.24
182	8745.69	35206.7	23670.5	22164.4	29282.4	71976.4	44628.3	86880.7	120758													182	87.4569	352.067	236.705	221.644	292.824	719.764	446.283	868.807	1207.58
183	8731.93	35246.9	23656.4	21988.8	29374.6	71920.7	44428.9	86903	120845													183	87.3193	352.469	236.564	219.888	293.746	719.207	444.289	869.03	1208.45
184	8757.99	35200.1	23644.2	22078.7	29378.9	71801.2	44408.3	86848.9	120821													184	87.5799	352.001	236.442	220.787	293.789	718.012	444.083	868.489	1208.21
185	8748.21	35120.4	23674.1	22009.6	29326.4	71886.3	44452.8	87240	121006													185	87.4821	351.204	236.741	220.096	293.264	718.863	444.528	872.4	1210.06
186	8749.5	35151.8	23710.5	21955.6	29409.9	71878.5	44502.7	86911.9	120895													186	87.495	351.518	237.105	219.556	294.099	718.785	445.027	869.119	1208.95
187	8794.68	35152.9	23677.6	22050.8	29313.3	71859.6	44383.2	86855.7	120948													187	87.9468	351.529	236.776	220.508	293.133	718.596	443.832	868.557	1209.48
188	8809.09	35158.5	23646.2	21997.9	29264.4	71857.8	44456.4	86795.6	120848													188	88.0909	351.585	236.462	219.979	292.644	718.578	444.564	867.956	1208.48
189	8778.03	35139.9	23635.9	21970.6	29424.1	71922.6	44457.3	86842.5	120712													189	87.7803	351.399	236.359	219.706	294.241	719.226	444.573	868.425	1207.12
190	8740.78	35190.1	23537.7	22034.3	29334.4	71880.8	44417.1	86830.3	120453													190	87.4078	351.901	235.377	220.343	293.344	718.808	444.171	868.303	1204.53
191	8780.03	35129.1	23661.3	22022.3	29386.3	71830	44471.8	86647	120390													191	87.8003	351.291	236.613	220.223	293.863	718.3	444.718	866.47	1203.9
192	8689.67	35102.8	23644	22049.9	29387.2	71860.4	44456.5	86635.9	120664													192	86.8967	351.028	236.44	220.499	293.872	718.604	444.565	866.359	1206.64
193	8796.42	35115.6	23528	21999.5	29224.1	71630.3	44317.6	86785.8	120689													193	87.9642	351.156	235.28	219.995	292.241	716.303	443.176	867.858	1206.89
194	8799.15	35149.3	23602.1	22007.1	29366.2	71832.8	44399	86828.7	120533													194	87.9915	351.493	236.021	220.071	293.662	718.328	443.99	868.287	1205.33
195	8736.97	35094	23558.1	22044.8	29358.4	71764.5	44462.8	86689.7	120698													195	87.3697	350.94	235.581	220.448	293.584	717.645	444.628	866.897	1206.98
196	8711.06	35093.8	23548.1	22052.8	29342.1	71965.7	44434.2	86625	120825													196	87.1106	350.938	235.481	220.528	293.421	719.657	444.342	866.25	1208.25
197	8640.58	35115	23585.5	21966.5	29271.3	71734.7	44290.3	86811.4	120647													197	86.4058	351.15	235.855	219.665	292.713	717.347	442.903	868.114	1206.47
198	8704.76	35201.2	23590.6	22023.7	29251.6	71420.3	44273.5	86659.9	120590													198	87.0476	352.012	235.906	220.237	292.516	714.203	442.735	866.599	1205.9
199	8728.42	34984.9	23546.8	22014.4	29339.2	71595.8	44387.1	86707.4	120657													199	87.2842	349.849	235.468	220.144	293.392	715.958	443.871	867.074	1206.57
200	8729.12	35063.2	23522.7	22000	29344.7	71714.4	44204.3	86354.9	120881													200	87.2912	350.632	235.227	220	293.447	717.144	442.043	863.549	1208.81
201	8721.71	35050.9	23647.9	22017.7	29301	71693.2	44382	86599.2	120625													201	87.2171	350.509	236.479	220.177	293.01	716.933	443.82	865.992	1206.25
202	8747.83	35074.4	23619.4	22003.8	29315.9	71711.4	44319	86631.2	120628													202	87.4783	350.744	236.194	220.038	293.159	717.114	443.19	866.312	1206.28
203	8768.92	35114.2	23617.7	22024.8	29315.2	71644.8	44343.8	86615.8	120755													203	87.6892	351.142	236.177	220.248	293.152	716.448	443.438	866.158	1207.55
204	8697.1	35092.5	23581.7	22086	29319.9	71737.3	44309.4	86590.8	120588													204	86.971	350.925	235.817	220.86	293.199	717.373	443.094	865.908	1205.88
205	8733.96	35025.7	23613.7	22034.8	29317.3	71623.1	44361.4	86468.6	120435													205	87.3396	350.257	236.137	220.347	293.173	716.231	443.614	864.686	1204.35
206	8819.67	35089	23601.2	21950.4	29313.7	71595	44271.6	86594.2	120347													206	88.1967	350.89	236.012	219.504	293.137	715.95	442.716	865.942	1203.47
207	8709.98	35061.1	23611	22036.3	29355.3	71726.6	44169.1	86424	120523													207	87.0998	350.611	236.11	220.363	293.553	717.266	441.691	864.24	1205.23
208	8671.1	35048.1	23447.8	22077.4	29273.1	71641.6	44137	86537.2	120490													208	86.711	350.481	234.478	220.774	292.731	716.416	441.37	865.372	1204.9
209	8735.64	35066.4	23598	21965.5	29231.3	71381.8	44204.9	86402.4	120437													209	87.3564	350.664	235.98	219.655	292.313	713.818	442.049	864.024	1204.37
210	8685.34	34997.8	23592.2	22077.1	29226.6	71570	44258.8	86493.9	120661													210	86.8534	349.978	235.922	220.771	292.266	715.7	442.588	864.939	1206.61
211	8776.34	35026.4	23512.4	22037.9	29147	71698.8	44265.7	86367.7	120283													211	87.7634	350.264	235.124	220.379	291.47	716.988	442.657	863.677	1202.83
212	8728.49	35052.9	23544.1	21982	29318.6	71622	44214.3	86355.8	120316													212	87.2849	350.529	235.441	219.82	293.186	716.22	442.143	863.558	1203.16
213	8739.78	35044.3	23581	21988.1	29265.7	71715.3	44180.4	86313.1	120066													213	87.3978	350.443	235.81	219.881	292.657	717.153	441.804	863.131	1200.66
214	8654.44	35128.3	23593.7	21970.8	29330.4	71655.4	44161.7	86374.8	120432													214	86.5444	351.283	235.937	219.708	293.304	716.554	441.617	863.748	1204.32
215	8731.41	35025.1	23531.9	22027.3	29278.3	71554.7	44366.6	86232	120257													215	87.3141	350.251	235.319	220.273	292.783	715.547	443.666	862.32	1202.57
216	8680.81	35118.7	23530	22068.1	29204.7	71506.2	44306.7	86002.6	120253													216	86.8081	351.187	235.3	220.681	292.047	715.062	443.067	860.026	1202.53
217	8680.98	35058.7	23464.6	22053	29286.1	71579.7	44264.5	86189.4	120213													217	86.8098	350.587	234.646	220.53	292.861	715.797	442.645	861.894	1202.13
218	8755.64	35087.8	23530.4	21985.4	29269.9	71312.4	44107.3	86194.2	120314													218	87.5564	350.878	235.304	219.854	292.699	713.124	441.073	861.942	1203.14
219	8636.65	35104.7	23402	22043.9	29190.8	71497.6	44183.4	86187.4	120463													219	86.3665	351.047	234.02	220.439	291.908	714.976	441.834	861.874	1204.63
220	8706.32	35002.1	23433.4	21987.3	29240.2	71599.7	44128.3	86204.6	120360													220	87.0632	350.021	234.334	219.873	292.402	715.997	441.283	862.046	1203.6
221	8705.55	34953.9	23513.4	21980	29235.1	71414	44170.3	86224.4	120179													221	87.0555	349.539	235.134	219.8	292.351	714.14	441.703	862.244	1201.79
222	8727.75	35120.1	23600	22057.9	29221.4	71476.6	44149.3	86106.7	119956													222	87.2775	351.201	236	220.579	292.214	714.766	441.493	861.067	1199.56
223	8761.28	35070.8	23439.8	22016.7	29272.7	71333.9	44134.9	86169	119954													223	87.6128	350.708	234.398	220.167	292.727	713.339	441.349	861.69	1199.54
224	8719.19	34992.1	23397.6	21960.5	29281.5	71412.5	44152.7	86074.2	120144													224	87.1919	349.921	233.976	219.605	292.815	714.125	441.527	860.742	1201.44
225	8691.01	34950.2	23653.5	21952.9	29326.6	71407.5	44083.7	86108.7	119992													225	86.9101	349.502	236.535	219.529	293.266	714.075	440.837	861.087	1199.92
226	8669.12	35022	23457.9	22034.9	29277.3	71481.2	44045.2	86043.7	120099													226	86.6912	350.22	234.579	220.349	292.773	714.812	440.452	860.437	1200.99
227	8734.27	35068.9	23457.5	21977.6	29314.4	71431.6	44210.7	86196.4	120208													227	87.3427	350.689	234.575	219.776	293.144	714.316	442.107	861.964	1202.08
228	8770.09	35045.9	23582.3	21946	29236.1	71327.5	44054.3	86041.6	119909													228	87.7009	350.459	235.823	219.46	292.361	713.275	440.543	860.416	1199.09
229	8744.5	34911.5	23506.1	21992.6	29307.1	71510.2	44025.2	85909.6	119991													229	87.445	349.115	235.061	219.926	293.071	715.102	440.252	859.096	1199.91
230	8696.79	35026.9	23445.7	22058.2	29184.7	71383.1	43919.8	85913.3	119987													230	86.9679	350.269	234.457	220.582	291.847	713.831	439.198	859.133	1199.87
231	8697.87	35049.2	23448	22047.7	29337	71497.2	44033.6	86072	120134													231	86.9787	350.492	234.48	220.477	293.37	714.972	440.336	860.72	1201.34
232	8691.04	34964.5	23493.2	22043.5	29264.8	71563.8	44072	85967.3	119912													232	86.9104	349.645	234.932	220.435	292.648	715.638	440.72	859.673	1199.12
233	8723.68	35056.3	23513.3	21943.2	29314.6	71529	44061.6	86140.3	120003													233	87.2368	350.563	235.133	219.433	293.146	715.29	440.616	861.403	1200.03
234	8661.81	34994.6	23492.2	21945.4	29288.6	71360.5	44106.2	86049.1	119906													234	86.6181	349.946	234.922	219.454	292.886	713.605	441.062	860.491	1199.06
235	8716.04	34951.3	23425.7	21918.4	29238.1	71372.4	44092.6	85952.4	119946													235	87.1604	349.513	234.257	219.184	292.381	713.724	440.926	859.524	1199.46
236	8734.93	34929.7	23475.4	21975.6	29188.1	71285.2	44102	85874.2	120030													236	87.3493	349.297	234.754	219.756	291.881	712.852	441.02	858.742	1200.3
237	8749.27	35008.5	23453.1	22026.7	29301	71331.3	44081.9	85911.5	120054													237	87.4927	350.085	234.531	220.267	293.01	713.313	440.819	859.115	1200.54
238	8669.99	35133	23460.2	21995.4	29209.9	71412.5	44083.5	86086	119838													238	86.6999	351.33	234.602	219.954	292.099	714.125	440.835	860.86	1198.38
239	8743.66	35114.3	23448.5	22035.9	29316.1	71340.2	43893.4	85803.6	119985													239	87.4366	351.143	234.485	220.359	293.161	713.402	438.934	858.036	1199.85
240	8743.85	35088.6	23475.4	21959.9	29286.6	71348	43987.7	86021.8	119850													240	87.4385	350.886	234.754	219.599	292.866	713.48	439.877	860.218	1198.5
241	8746.68	34936	23485.3	21999.5	29264.8	71226.2	44094.7	85759.2	119760													241	87.4668	349.36	234.853	219.995	292.648	712.262	440.947	857.592	1197.6
242	8707.98	35043.4	23547.5	22012.8	29173.4	71372.4	44036.8	85761.7	119743													242	87.0798	350.434	235.475	220.128	291.734	713.724	440.368	857.617	1197.43
243	8700.25	34923.6	23449.2	21983.6	29257.6	71273	44015.1	85734.3	119787													243	87.0025	349.236	234.492	219.836	292.576	712.73	440.151	857.343	1197.87
244	8719.29	34885.1	23559.4	21969	29209	71445.3	44018.1	85776.4	120024													244	87.1929	348.851	235.594	219.69	292.09	714.453	440.181	857.764	1200.24
245	8676.93	34993.2	23489.5	22022.8	29143.6	71179.6	43835.8	85477.4	119733													245	86.7693	349.932	234.895	220.228	291.436	711.796	438.358	854.774	1197.33
246	8684.26	35079.7	23450.8	21986.4	29353.8	71293.5	44031	85838.9	119963													246	86.8426	350.797	234.508	219.864	293.538	712.935	440.31	858.389	1199.63
247	8722.52	35009.4	23454.8	21993.9	29223.6	71227.1	43909.3	85761	119779													247	87.2252	350.094	234.548	219.939	292.236	712.271	439.093	857.61	1197.79
248	8711.84	35038.1	23501.9	22076.5	29343.8	71348.2	43791.4	85799	119688													248	87.1184	350.381	235.019	220.765	293.438	713.482	437.914	857.99	1196.88
249	8693.74	34996.4	23470.9	21958.3	29167.9	71298.7	43965.3	85728.8	119790													249	86.9374	349.964	234.709	219.583	291.679	712.987	439.653	857.288	1197.9
250	8597.26	34952	23426.2	21964.4	29272.7	71278.8	43900.1	85738.8	119837													250	85.9726	349.52	234.262	219.644	292.727	712.788	439.001	857.388	1198.37
251	8703.06	34812.1	23382.4	21978.6	29229.6	71199.4	43849.1	85707	119450													251	87.0306	348.121	233.824	219.786	292.296	711.994	438.491	857.07	1194.5
252	8699.16	34962.9	23377.5	21991.5	29241.4	71238.5	43962.7	85751.7	119656													252	86.9916	349.629	233.775	219.915	292.414	712.385	439.627	857.517	1196.56
253	8651.77	34955.9	23412.8	22041.6	29136.1	71227.9	43845.9	85758.7	119636													253	86.5177	349.559	234.128	220.416	291.361	712.279	438.459	857.587	1196.36
254	8699.19	34864.7	23391.4	21950.6	29055.7	71276.4	43807	85755.8	119600													254	86.9919	348.647	233.914	219.506	290.557	712.764	438.07	857.558	1196
255	8716.67	34911.7	23392.5	22048.7	29113.3	71112.1	43831	85680.4	119449													255	87.1667	349.117	233.925	220.487	291.133	711.121	438.31	856.804	1194.49
256	8656.45	34974.7	23455.8	21973.6	29187.2	71148.6	43834.1	85806.1	119519													256	86.5645	349.747	234.558	219.736	291.872	711.486	438.341	858.061	1195.19
257	8702.8	34944.4	23459	22004.8	29171.4	71175.1	43891.1	85553.5	119844													257	87.028	349.444	234.59	220.048	291.714	711.751	438.911	855.535	1198.44
258	8675.42	34862	23489.2	21959.9	29121.3	71148	43894.4	85394.3	119588													258	86.7542	348.62	234.892	219.599	291.213	711.48	438.944	853.943	1195.88
259	8712.53	34860.5	23374.8	21962.6	29089.1	71124.1	43822.9	85607.7	119657													259	87.1253	348.605	233.748	219.626	290.891	711.241	438.229	856.077	1196.57
260	8719.64	34842.8	23442.6	22010.4	29105.8	71172.5	43798.5	85393.9	119741													260	87.1964	348.428	234.426	220.104	291.058	711.725	437.985	853.939	1197.41
261	8690.09	34874.2	23430	22034.2	29170.7	71212.6	43812.1	85666.1	119362													261	86.9009	348.742	234.3	220.342	291.707	712.126	438.121	856.661	1193.62
262	8667.56	34950.8	23424.5	21923.6	29246.4	71225.2	43823.5	85590.5	119450													262	86.6756	349.508	234.245	219.236	292.464	712.252	438.235	855.905	1194.5
263	8760.11	34891.4	23366.5	22046.7	29147	71120.4	43694.4	85552.4	119324													263	87.6011	348.914	233.665	220.467	291.47	711.204	436.944	855.524	1193.24
264	8647.88	34945.5	23487.6	22052.2	29143	71113.4	43817.2	85575.4	119455													264	86.4788	349.455	234.876	220.522	291.43	711.134	438.172	855.754	1194.55
265	8702.35	34868.5	23392.8	22051.7	29156	71170.3	43797.6	85498.8	119470													265	87.0235	348.685	233.928	220.517	291.56	711.703	437.976	854.988	1194.7
266	8728.29	34933.3	23407.9	21974.4	29238.2	71207	43905.2	85733.5	119492													266	87.2829	349.333	234.079	219.744	292.382	712.07	439.052	857.335	1194.92
267	8664.25	34936.8	23383.3	22095.9	29152.2	71172.7	43727.1	85435	119408													267	86.6425	349.368	233.833	220.959	291.522	711.727	437.271	854.35	1194.08
268	8699.04	34900.2	23454.6	21957.6	29177.7	71014.2	43812.5	85461.1	119505													268	86.9904	349.002	234.546	219.576	291.777	710.142	438.125	854.611	1195.05
269	8642.18	35006.6	23374.1	21924	29186.2	71098.3	43746	85485.7	119234													269	86.4218	350.066	233.741	219.24	291.862	710.983	437.46	854.857	1192.34
270	8715.56	34853	23423.3	21989.3	29135.6	70898.7	43665.7	85380.6	119436													270	87.1556	348.53	234.233	219.893	291.356	708.987	436.657	853.806	1194.36
271	8664.75	34896.4	23425.3	21904.6	29214.3	71006.5	43857.6	85213.2	119384													271	86.6475	348.964	234.253	219.046	292.143	710.065	438.576	852.132	1193.84
272	8686.19	34904.1	23428.5	21907.9	29115.4	70967.6	43886.1	85461.7	119397													272	86.8619	349.041	234.285	219.079	291.154	709.676	438.861	854.617	1193.97
273	8669.33	34850.7	23477.8	22009	29094.6	71112.5	43762	85530.2	119427													273	86.6933	348.507	234.778	220.09	290.946	711.125	437.62	855.302	1194.27
274	8683.89	34906.5	23375.3	21948.6	29104.1	71125.2	43768	85168.7	119513													274	86.8389	349.065	233.753	219.486	291.041	711.252	437.68	851.687	1195.13
275	8642.37	34754	23309.7	21909	29144.3	70902.6	43634	85218.9	119191													275	86.4237	347.54	233.097	219.09	291.443	709.026	436.34	852.189	1191.91
276	8676.64	34900.1	23413.4	21938.5	29133.5	71013.5	43635.6	85357.1	119322													276	86.7664	349.001	234.134	219.385	291.335	710.135	436.356	853.571	1193.22
277	8621.75	34803.3	23402	21930.7	29156.1	71021.9	43802.4	85302.2	119077													277	86.2175	348.033	234.02	219.307	291.561	710.219	438.024	853.022	1190.77
278	8719.62	34866.6	23359.9	21951.2	29263.6	70919	43580.5	85219	119239													278	87.1962	348.666	233.599	219.512	292.636	709.19	435.805	852.19	1192.39
279	8705.34	34861.9	23268.2	21926.9	29013.8	70946.5	43673.6	85438.2	119095													279	87.0534	348.619	232.682	219.269	290.138	709.465	436.736	854.382	1190.95
280	8662.39	34903.4	23321.6	21976.4	29186.3	70773.4	43581.7	85215.8	119297													280	86.6239	349.034	233.216	219.764	291.863	707.734	435.817	852.158	1192.97
281	8657.17	34741.6	23456.3	21931.3	29071.2	70848.4	43672.6	85382.4	119260													281	86.5717	347.416	234.563	219.313	290.712	708.484	436.726	853.824	1192.6
282	8664.81	34843.3	23326.8	22030.5	29179.1	71139.8	43765.8	85368.5	119045													282	86.6481	348.433	233.268	220.305	291.791	711.398	437.658	853.685	1190.45
283	8662.75	34845.1	23344	21987.8	29130.4	71068.2	43656.2	85241.5	119127													283	86.6275	348.451	233.44	219.878	291.304	710.682	436.562	852.415	1191.27
284	8696.93	34860.7	23402.9	22032.9	29085.9	70873.3	43615.3	85294.4	119188													284	86.9693	348.607	234.029	220.329	290.859	708.733	436.153	852.944	1191.88
285	8602.01	34848.1	23373.8	21950	29174.1	70872.2	43522.5	85159.1	119061													285	86.0201	348.481	233.738	219.5	291.741	708.722	435.225	851.591	1190.61
286	8693.18	34829.6	23366.2	22005.2	29107	70937.6	43605.1	85184.8	119251													286	86.9318	348.296	233.662	220.052	291.07	709.376	436.051	851.848	1192.51
287	8682.63	34815.8	23333.1	21976.2	29137.7	70838.2	43560.3	85121.5	118954													287	86.8263	348.158	233.331	219.762	291.377	708.382	435.603	851.215	1189.54
288	8690.16	34821.9	23310.7	21946.4	29190.6	71030.3	43598.7	85372.9	119032													288	86.9016	348.219	233.107	219.464	291.906	710.303	435.987	853.729	1190.32
289	8654.25	34767.3	23404.5	21979.3	29060	70833.1	43727.9	85038.2	119010													289	86.5425	347.673	234.045	219.793	290.6	708.331	437.279	850.382	1190.1
290	8661.59	34764.6	23413.7	21906.9	29098.9	70912.1	43729.5	85134.4	119107													290	86.6159	347.646	234.137	219.069	290.989	709.121	437.295	851.344	1191.07
291	8647.28	34854.6	23332.5	21921.3	29209.9	70932.4	43561.4	85291.9	119023													291	86.4728	348.546	233.325	219.213	292.099	709.324	435.614	852.919	1190.23
292	8658.38	34988	23360	21990.8	29058.3	70737.6	43449.4	85022.5	118954													292	86.5838	349.88	233.6	219.908	290.583	707.376	434.494	850.225	1189.54
293	8603.31	34890.7	23327.5	21930.2	29159.1	70927.4	43595.7	85177.9	118719													293	86.0331	348.907	233.275	219.302	291.591	709.274	435.957	851.779	1187.19
294	8647.91	34748.1	23362.8	21876.2	29066.3	70862.4	43555.5	85122	118881													294	86.4791	347.481	233.628	218.762	290.663	708.624	435.555	851.22	1188.81
295	8659.01	34855.5	23412.6	21972.4	29089.3	70952.6	43700	85006	118922													295	86.5901	348.555	234.126	219.724	290.893	709.526	437	850.06	1189.22
296	8603.81	34795.6	23366.3	21909.2	29020.4	70920.9	43453	85305.2	118839													296	86.0381	347.956	233.663	219.092	290.204	709.209	434.53	853.052	1188.39
297	8608.46	34759.8	23317.9	21955	29091.4	70697.2	43697.7	85064.1	118888													297	86.0846	347.598	233.179	219.55	290.914	706.972	436.977	850.641	1188.88
298	8616.49	34841	23302.5	22005.1	29076.8	70791	43444.4	85234.8	118869													298	86.1649	348.41	233.025	220.051	290.768	707.91	434.444	852.348	1188.69
299	8706.22	34799.2	23284.4	21940.1	29109.4	70931	43550	84924.1	118965													299	87.0622	347.992	232.844	219.401	291.094	709.31	435.5	849.241	1189.65
300	8671.59	34857.4	23396.9	21955.3	29051.6	70842.6	43481.8	85055.2	118964													300	86.7159	348.574	233.969	219.553	290.516	708.426	434.818	850.552	1189.64
301	8608.27	34861.4	23264.3	22033.2	29037	70832.1	43570.9	84971.5	118804													301	86.0827	348.614	232.643	220.332	290.37	708.321	435.709	849.715	1188.04
302	8665.24	34867.3	23296.7	21887.7	29173.8	70830.5	43436.7	85023.4	118704													302	86.6524	348.673	232.967	218.877	291.738	708.305	434.367	850.234	1187.04
303	8663.97	34863.3	23245.1	21899.7	29137.2	70787.2	43605.5	84983.2	118929													303	86.6397	348.633	232.451	218.997	291.372	707.872	436.055	849.832	1189.29
304	8585.94	34823.7	23302.7	22015.4	28931.1	70619.5	43689.8	85004.2	118747													304	85.8594	348.237	233.027	220.154	289.311	706.195	436.898	850.042	1187.47
305	8622.72	34727	23326.3	21902.4	29078.5	70847.8	43549	85046	118676													305	86.2272	347.27	233.263	219.024	290.785	708.478	435.49	850.46	1186.76
306	8598.37	34896.2	23411.6	21875.2	29143.9	70736.6	43586	85170.4	118789													306	85.9837	348.962	234.116	218.752	291.439	707.366	435.86	851.704	1187.89
307	8632.54	34788.6	23334.5	21949.1	29204.2	70778.3	43462.4	84838.4	118461													307	86.3254	347.886	233.345	219.491	292.042	707.783	434.624	848.384	1184.61
308	8692.16	34721.1	23412	21927.8	29151.4	70568	43580.6	84916.7	118627													308	86.9216	347.211	234.12	219.278	291.514	705.68	435.806	849.167	1186.27
309	8668.94	34657.2	23318.8	21920.5	29000	70827.9	43496.3	84861.4	118770													309	86.6894	346.572	233.188	219.205	290	708.279	434.963	848.614	1187.7
310	8610.27	34937.1	23266	21901.3	29196.9	70837.8	43539	84934.7	118743													310	86.1027	349.371	232.66	219.013	291.969	708.378	435.39	849.347	1187.43
311	8653.76	34794.1	23350.9	21907.9	28983.6	70744.9	43445.4	85047	118663													311	86.5376	347.941	233.509	219.079	289.836	707.449	434.454	850.47	1186.63
312	8665.18	34928	23305	21909.8	29034.3	70660.5	43451.3	84953	118895													312	86.6518	349.28	233.05	219.098	290.343	706.605	434.513	849.53	1188.95
313	8587.59	34708.2	23422.1	21790.5	29065.8	70680.9	43526.7	84944.9	118592													313	85.8759	347.082	234.221	217.905	290.658	706.809	435.267	849.449	1185.92
314	8629.15	34832.8	23284.1	21990.3	29031.3	70696.3	43439	84906.7	118720													314	86.2915	348.328	232.841	219.903	290.313	706.963	434.39	849.067	1187.2
315	8668.77	34908.4	23339.6	21920.4	28986.2	70745.2	43489.8	84830.1	118872													315	86.6877	349.084	233.396	219.204	289.862	707.452	434.898	848.301	1188.72
316	8652.41	34703.7	23272.6	22005.3	29098.2	70760.8	43586.1	84892.8	118626													316	86.5241	347.037	232.726	220.053	290.982	707.608	435.861	848.928	1186.26
317	8691.55	34755.3	23358.8	21890.9	29046.1	70568.3	43453.3	84804	118558													317	86.9155	347.553	233.588	218.909	290.461	705.683	434.533	848.04	1185.58
318	8646.94	34722.5	23276.9	21993.8	29066.7	70686.4	43463.1	84803.4	118598													318	86.4694	347.225	232.769	219.938	290.667	706.864	434.631	848.034	1185.98
319	8651.05	34672.4	23261.7	21817.2	29072.4	70679	43464	84593.3	118636													319	86.5105	346.724	232.617	218.172	290.724	706.79	434.64	845.933	1186.36
320	8636.5	34820.1	23315.5	21857	29098.7	70505.2	43303.8	84881.8	118511													320	86.365	348.201	233.155	218.57	290.987	705.052	433.038	848.818	1185.11
321	8590.02	34742.9	23300.8	21902.9	29101.9	70776.3	43405.8	84801.3	118471													321	85.9002	347.429	233.008	219.029	291.019	707.763	434.058	848.013	1184.71
322	8664.52	34715.8	23304.7	21933.8	28948.7	70698.3	43371.3	84822.8	118718													322	86.6452	347.158	233.047	219.338	289.487	706.983	433.713	848.228	1187.18
323	8605.56	34788.1	23206.7	21902.3	29017.5	70488.8	43470.6	84914.9	118431													323	86.0556	347.881	232.067	219.023	290.175	704.888	434.706	849.149	1184.31
324	8637.76	34673.6	23303.1	21872.5	29010.3	70540.9	43456.6	84842.1	118374													324	86.3776	346.736	233.031	218.725	290.103	705.409	434.566	848.421	1183.74
325	8700.78	34621.6	23295.8	21945.6	29011.1	70583.2	43578.6	84770.7	118445													325	87.0078	346.216	232.958	219.456	290.111	705.832	435.786	847.707	1184.45
326	8614.9	34755.3	23256.1	21954.7	29041.1	70532.2	43427.3	84670.7	118432													326	86.149	347.553	232.561	219.547	290.411	705.322	434.273	846.707	1184.32
327	8639.43	34709.6	23225	21909.8	28972.9	70599.2	43475.4	84712.4	118531													327	86.3943	347.096	232.25	219.098	289.729	705.992	434.754	847.124	1185.31
328	8645.72	34832.1	23307.5	21934.3	28939.6	70424.6	43416.1	84660.2	118410													328	86.4572	348.321	233.075	219.343	289.396	704.246	434.161	846.602	1184.1
329	8663.32	34683.7	23298.4	21941.5	28968	70564.1	43515.6	84504	118420													329	86.6332	346.837	232.984	219.415	289.68	705.641	435.156	845.04	1184.2
330	8578.27	34789.4	23227.9	21874.8	29016.1	70601.3	43390.8	84589.2	118457													330	85.7827	347.894	232.279	218.748	290.161	706.013	433.908	845.892	1184.57
331	8653.78	34746.8	23311.9	21991.4	29042.4	70651.1	43381.5	84601.5	118485													331	86.5378	347.467	233.119	219.914	290.424	706.511	433.815	846.015	1184.85
332	8612.8	34617.2	23319.2	21824.8	29042.6	70598.4	43358.5	84720.9	118235													332	86.128	346.172	233.192	218.248	290.426	705.984	433.585	847.209	1182.35
333	8588.47	34722.9	23245.4	22002.3	28986.7	70604.5	43373.3	84647.2	118201													333	85.8847	347.229	232.454	220.023	289.867	706.045	433.733	846.472	1182.01
334	8588.11	34743.3	23200	21919.5	29070.7	70509.8	43439.8	84763.7	118389													334	85.8811	347.433	232	219.195	290.707	705.098	434.398	847.637	1183.89
335	8627.9	34676.1	23303.9	21927.3	29121.2	70589.5	43312	84699.6	118270													335	86.279	346.761	233.039	219.273	291.212	705.895	433.12	846.996	1182.7
336	8600.13	34711.3	23249.5	21940	29015.1	70544.4	43293.3	84596.5	118175													336	86.0013	347.113	232.495	219.4	290.151	705.444	432.933	845.965	1181.75
337	8630.94	34647.7	23293.1	21956.6	29090.1	70523	43310.5	84634.3	118192													337	86.3094	346.477	232.931	219.566	290.901	705.23	433.105	846.343	1181.92
338	8617.78	34723	23290.1	21919.6	28933.6	70474.5	43384.8	84299	118234													338	86.1778	347.23	232.901	219.196	289.336	704.745	433.848	842.99	1182.34
339	8667.1	34767.1	23146.6	22024.8	29093.2	70649.9	43490.4	84783	118129													339	86.671	347.671	231.466	220.248	290.932	706.499	434.904	847.83	1181.29
340	8642.72	34688	23294.5	21883.1	29045.8	70306.1	43322	84451.9	118244													340	86.4272	346.88	232.945	218.831	290.458	703.061	433.22	844.519	1182.44
341	8624.54	34685.3	23187.2	21854.2	29084.7	70618.9	43397.8	84682.4	118222													341	86.2454	346.853	231.872	218.542	290.847	706.189	433.978	846.824	1182.22
342	8663.74	34590.1	23352.1	21950.6	29030.2	70413.5	43367	84422.3	118100													342	86.6374	345.901	233.521	219.506	290.302	704.135	433.67	844.223	1181
343	8629.62	34596.1	23252	21867.2	29078.3	70560	43347.5	84649.1	118293													343	86.2962	345.961	232.52	218.672	290.783	705.6	433.475	846.491	1182.93
344	8660.52	34681.4	23214.5	22009.4	28990.6	70471.1	43318.2	84429.3	118443													344	86.6052	346.814	232.145	220.094	289.906	704.711	433.182	844.293	1184.43
345	8644.36	34707.3	23263.5	21932.6	28997.9	70359.7	43147.7	84519.9	118036													345	86.4436	347.073	232.635	219.326	289.979	703.597	431.477	845.199	1180.36
346	8578.03	34708.9	23249.9	21850.7	29037	70512.1	43275.9	84719.5	118164													346	85.7803	347.089	232.499	218.507	290.37	705.121	432.759	847.195	1181.64
347	8638.77	34613.6	23229.2	21936.6	29044.9	70507.9	43257.4	84497.2	118197													347	86.3877	346.136	232.292	219.366	290.449	705.079	432.574	844.972	1181.97
348	8680.31	34726.8	23245.9	21953.9	29115	70515.5	43243.3	84629.9	118090													348	86.8031	347.268	232.459	219.539	291.15	705.155	432.433	846.299	1180.9
349	8621.27	34674	23221.5	21894.5	29017.6	70502.7	43357.1	84501.9	118086													349	86.2127	346.74	232.215	218.945	290.176	705.027	433.571	845.019	1180.86
350	8590.51	34747.9	23328.4	21948.6	28992	70501.8	43404	84409.9	117927													350	85.9051	347.479	233.284	219.486	289.92	705.018	434.04	844.099	1179.27
351	8562.14	34633	23169.9	21818.6	28942.3	70369.6	43177.1	84449.5	118061													351	85.6214	346.33	231.699	218.186	289.423	703.696	431.771	844.495	1180.61
352	8594.33	34640.1	23275.6	21958.7	28966.6	70332.7	43269.2	84430.2	118139													352	85.9433	346.401	232.756	219.587	289.666	703.327	432.692	844.302	1181.39
353	8589.14	34760.3	23163.8	21961.7	28956.1	70520.3	43281.4	84554.5	118018													353	85.8914	347.603	231.638	219.617	289.561	705.203	432.814	845.545	1180.18
354	8638.16	34758.5	23189.9	22004	29113.5	70481.8	43343.5	84471.6	117864													354	86.3816	347.585	231.899	220.04	291.135	704.818	433.435	844.716	1178.64
355	8628.23	34784.3	23190.2	21824.4	28940.1	70439.8	43338	84422.6	118076													355	86.2823	347.843	231.902	218.244	289.401	704.398	433.38	844.226	1180.76
356	8577.35	34541.1	23197.3	21982.6	29044.2	70290.9	43244.1	84528.2	118029													356	85.7735	345.411	231.973	219.826	290.442	702.909	432.441	845.282	1180.29
357	8605.24	34692.7	23195.8	21894.2	28943.4	70318.5	43199.1	84302.8	117948													357	86.0524	346.927	231.958	218.942	289.434	703.185	431.991	843.028	1179.48
358	8593.83	34600.2	23210.4	21866	28829.4	70357.3	43184.2	84366	117961													358	85.9383	346.002	232.104	218.66	288.294	703.573	431.842	843.66	1179.61
359	8595.65	34651.4	23140.2	21877.5	28914.3	70169.7	43238.2	84378.3	118040													359	85.9565	346.514	231.402	218.775	289.143	701.697	432.382	843.783	1180.4
360	8607.44	34693.3	23115.1	21884.2	29036.1	70238	43171.7	84376.7	117926													360	86.0744	346.933	231.151	218.842	290.361	702.38	431.717	843.767	1179.26
361	8618.88	34619.2	23149.3	21854.6	29064.6	70212	43204.8	84283.1	117886													361	86.1888	346.192	231.493	218.546	290.646	702.12	432.048	842.831	1178.86
362	8607.83	34712.4	23166	21922	29092.1	70377.7	43244.7	84444.6	117889													362	86.0783	347.124	231.66	219.22	290.921	703.777	432.447	844.446	1178.89
363	8643.45	34592.7	23150.7	21963.4	28897.5	70281.6	43043.9	84192.8	118029													363	86.4345	345.927	231.507	219.634	288.975	702.816	430.439	841.928	1180.29
364	8646.25	34643.6	23193.3	21901.3	29024.8	70260.3	43195.4	84333.5	117958													364	86.4625	346.436	231.933	219.013	290.248	702.603	431.954	843.335	1179.58
365	8625.43	34709.6	23165.5	21791.7	29036.2	70470.4	43242.4	84292.7	117774													365	86.2543	347.096	231.655	217.917	290.362	704.704	432.424	842.927	1177.74
366	8658.31	34749.7	23317.6	21953.5	29071.2	70340.1	43034.5	84247.8	117950													366	86.5831	347.497	233.176	219.535	290.712	703.401	430.345	842.478	1179.5
367	8533.54	34637.5	23135.5	21942.1	28980.7	70400.2	43291.6	84313.2	117898													367	85.3354	346.375	231.355	219.421	289.807	704.002	432.916	843.132	1178.98
368	8597.86	34705	23167	21988.8	28981.7	70231.4	43284.2	84039.6	117911													368	85.9786	347.05	231.67	219.888	289.817	702.314	432.842	840.396	1179.11
369	8615.41	34684.9	23271.6	21893.9	28993	70353.5	43214.4	84281.9	117842													369	86.1541	346.849	232.716	218.939	289.93	703.535	432.144	842.819	1178.42
370	8540.44	34699.1	23205.4	21939	28988.4	70251.8	43133.8	84225	117811													370	85.4044	346.991	232.054	219.39	289.884	702.518	431.338	842.25	1178.11
371	8668.29	34644.7	23178.6	21920.6	29010.1	70333.9	43229.4	84353.7	118036													371	86.6829	346.447	231.786	219.206	290.101	703.339	432.294	843.537	1180.36
372	8600.45	34587.4	23156.6	21844.7	28974.9	70270.5	43073.5	84289.1	117826													372	86.0045	345.874	231.566	218.447	289.749	702.705	430.735	842.891	1178.26
373	8629.13	34603.8	23284.8	21850	29000.4	70244.7	43129.4	84246.7	117779													373	86.2913	346.038	232.848	218.5	290.004	702.447	431.294	842.467	1177.79
374	8631.27	34738.1	23308.3	21873.3	28869	70286.9	43223.1	84280.3	118028													374	86.3127	347.381	233.083	218.733	288.69	702.869	432.231	842.803	1180.28
375	8621	34749	23119.3	21886.5	28978.9	70352.8	43263.6	84168.5	117888													375	86.21	347.49	231.193	218.865	289.789	703.528	432.636	841.685	1178.88
376	8602.13	34706.1	23314.8	21836.3	28990.4	70178.1	43102.2	84294.1	117701													376	86.0213	347.061	233.148	218.363	289.904	701.781	431.022	842.941	1177.01
377	8626.57	34669.6	23162.9	21824.4	28981.6	70226.9	43032.3	84188.8	117797													377	86.2657	346.696	231.629	218.244	289.816	702.269	430.323	841.888	1177.97
378	8604.99	34738.6	23210.3	21879.5	28977.3	70120.3	43049.9	84144	117728													378	86.0499	347.386	232.103	218.795	289.773	701.203	430.499	841.44	1177.28
379	8600.2	34670	23106.3	21865.1	28941.9	70305.6	42996.8	84215.8	117694													379	86.002	346.7	231.063	218.651	289.419	703.056	429.968	842.158	1176.94
380	8577.12	34539.1	23290.9	21888.7	28896.9	70365.9	43114.1	84303.9	117643													380	85.7712	345.391	232.909	218.887	288.969	703.659	431.141	843.039	1176.43
381	8603.65	34566.8	23227.8	21854.4	28965.7	70196.2	43044.9	84146.9	117766													381	86.0365	345.668	232.278	218.544	289.657	701.962	430.449	841.469	1177.66
382	8577.08	34611	23233.2	21842.7	29007.7	70272.2	43062.6	84093.9	117738													382	85.7708	346.11	232.332	218.427	290.077	702.722	430.626	840.939	1177.38
383	8597.13	34588.9	23179.3	21871.2	28929.9	70149.3	43199.9	84083.1	117618													383	85.9713	345.889	231.793	218.712	289.299	701.493	431.999	840.831	1176.18
384	8549.19	34646.5	23287.6	21776.9	28941.1	70283.2	43163.6	84060.5	117581													384	85.4919	346.465	232.876	217.769	289.411	702.832	431.636	840.605	1175.81
385	8604.94	34517.9	23177.8	21873	28777.1	70115.7	43088	84226.1	117711													385	86.0494	345.179	231.778	218.73	287.771	701.157	430.88	842.261	1177.11
386	8621.36	34558.4	23140.8	21827.9	29039.9	70176.3	43009.9	84195.5	117494													386	86.2136	345.584	231.408	218.279	290.399	701.763	430.099	841.955	1174.94
387	8587.03	34700.2	23173.3	21966.3	28936.2	70165	43036.1	84102.9	117760													387	85.8703	347.002	231.733	219.663	289.362	701.65	430.361	841.029	1177.6
388	8647.86	34493.9	23260.7	21867.5	28956.6	70251.9	42968.1	84021.3	117663													388	86.4786	344.939	232.607	218.675	289.566	702.519	429.681	840.213	1176.63
389	8559.93	34697.9	23175.6	21808.3	28982	70124.1	43131.1	83909.7	117536													389	85.5993	346.979	231.756	218.083	289.82	701.241	431.311	839.097	1175.36
390	8640.55	34496.9	23217.3	21898.7	29006.4	70218.9	42993.2	84184.3	117417													390	86.4055	344.969	232.173	218.987	290.064	702.189	429.932	841.843	1174.17
391	8589.71	34516.7	23178.4	21833.6	28900.1	70102.2	43154.3	84065.3	117504													391	85.8971	345.167	231.784	218.336	289.001	701.023	431.543	840.653	1175.04
392	8614.27	34683	23208.1	21834.8	29008.2	70237.9	42944.2	84051.6	117537													392	86.1427	346.83	232.081	218.348	290.082	702.379	429.442	840.516	1175.37
393	8605.64	34511.5	23109.4	21839	28843.8	70218.2	43083.8	83963.6	117577													393	86.0564	345.115	231.094	218.39	288.438	702.182	430.837	839.636	1175.77
394	8642.95	34630.4	23258.8	21925.7	28926.5	70054.6	43087.1	83986.8	117499													394	86.4295	346.304	232.588	219.257	289.265	700.546	430.871	839.868	1174.99
395	8575.6	34646.2	23158.6	21883.1	28873.7	70229.2	43226.8	83957.6	117648													395	85.756	346.462	231.586	218.831	288.737	702.292	432.268	839.576	1176.48
396	8601.63	34404.1	23150.9	21892.8	28881.6	70115.1	43063.1	84087.6	117684													396	86.0163	344.041	231.509	218.928	288.816	701.151	430.631	840.876	1176.84
397	8599.51	34590.2	23181.4	21884.3	28965.4	70273.9	43107.4	84086.3	117626													397	85.9951	345.902	231.814	218.843	289.654	702.739	431.074	840.863	1176.26
398	8574.54	34573.3	23140.2	21918.6	28890.6	70225.4	43004.4	83918.6	117418													398	85.7454	345.733	231.402	219.186	288.906	702.254	430.044	839.186	1174.18
399	8660.88	34637.8	23067.5	21841.8	28748.7	70101.2	43135.7	83939.8	117544													399	86.6088	346.378	230.675	218.418	287.487	701.012	431.357	839.398	1175.43
400	8598.49	34567	23063.6	21907.5	28831.7	70381.4	43041	83949.4	117392													400	85.9849	345.67	230.636	219.075	288.317	703.814	430.41	839.494	1173.92
401	8623.6	34631.8	23029.6	21920.3	28930.6	70155.5	42958.4	84106.6	117411													401	86.236	346.318	230.296	219.203	289.306	701.555	429.584	841.066	1174.11
402	8654.34	34605.1	23118.9	22001	28935.6	70001	43051.4	83928	117474													402	86.5434	346.051	231.189	220.01	289.356	700.01	430.514	839.28	1174.74
403	8566.16	34584.7	23280.8	21783.1	28901.9	70211.8	42987.2	84038.8	117438													403	85.6616	345.847	232.808	217.831	289.019	702.117	429.872	840.388	1174.38
404	8618.41	34622.6	23198.9	21797.1	28855.4	70105.5	43017.2	83905.5	117260													404	86.1841	346.226	231.989	217.971	288.554	701.055	430.172	839.055	1172.6
405	8577.62	34507.7	23116.8	21777.9	28909	70064.9	42921.6	83753.6	117214													405	85.7762	345.077	231.168	217.779	289.09	700.649	429.216	837.536	1172.14
406	8602.48	34601.5	23191.7	21861.6	28927.8	69900.1	43023.1	83992	117335													406	86.0248	346.015	231.917	218.616	289.278	699.001	430.231	839.92	1173.35
407	8591.81	34546.5	23113	21792.4	28937.6	70080.1	42988.6	83716.1	117340													407	85.9181	345.465	231.13	217.924	289.376	700.801	429.886	837.161	1173.4
408	8596.51	34580.5	23222.8	21855.4	28966.1	70096.7	42940	83790.8	117347													408	85.9651	345.805	232.228	218.554	289.661	700.967	429.4	837.908	1173.47
409	8617.08	34505.9	23149.6	21917	28924.3	69827	43070.5	83983.2	117335													409	86.1708	345.059	231.496	219.17	289.243	698.27	430.705	839.832	1173.35
410	8670.34	34545.2	23263.1	21907.1	28854.5	70041.3	43053.5	83813.9	117335													410	86.7034	345.452	232.631	219.071	288.545	700.413	430.535	838.139	1173.35
411	8543.78	34493.6	23221	21846.4	28980.4	70108.7	42974.7	83710.1	117381													411	85.4378	344.936	232.21	218.464	289.804	701.087	429.747	837.101	1173.81
412	8571.21	34563.8	23147.1	21837.9	28867.9	70125.4	42929.8	83836.4	117035													412	85.7121	345.638	231.471	218.379	288.679	701.254	429.298	838.364	1170.35
413	8606.39	34686.4	23140	21770.9	28898.3	70058.3	42963.3	83716.3	117468													413	86.0639	346.864	231.4	217.709	288.983	700.583	429.633	837.163	1174.68
414	8594.47	34497.6	23206.5	21863.2	28823.4	70047.6	42960.5	83954.7	117202													414	85.9447	344.976	232.065	218.632	288.234	700.476	429.605	839.547	1172.02
415	8548.56	34569.5	23144.2	21852.8	28891.5	70033.4	42993	83940.5	116948													415	85.4856	345.695	231.442	218.528	288.915	700.334	429.93	839.405	1169.48
416	8552.96	34467	23065.6	21891.2	28972.5	69828.8	42982.1	83820.1	117152													416	85.5296	344.67	230.656	218.912	289.725	698.288	429.821	838.201	1171.52
417	8546.51	34534.7	23072.7	21897.7	28919.9	70077	43027.2	83768.9	117227													417	85.4651	345.347	230.727	218.977	289.199	700.77	430.272	837.689	1172.27
418	8558.37	34552.4	23194.4	21870.6	28880.6	69995.7	42969.2	83698.1	117378													418	85.5837	345.524	231.944	218.706	288.806	699.957	429.692	836.981	1173.78
419	8600.77	34510.7	23116.1	21799.2	28955.1	69903.8	42954.9	83833.9	117153													419	86.0077	345.107	231.161	217.992	289.551	699.038	429.549	838.339	1171.53
420	8631.31	34612.1	23042.9	21829.1	28912.4	69792.2	42938	83854.3	117481													420	86.3131	346.121	230.429	218.291	289.124	697.922	429.38	838.543	1174.81
421	8624.4	34617.9	23098.2	21932.4	29005.7	69934.5	42957.5	83799.6	117232													421	86.244	346.179	230.982	219.324	290.057	699.345	429.575	837.996	1172.32
422	8552.95	34528.6	23195.8	21797.4	28966.6	69943.7	42957.5	83816.7	117022													422	85.5295	345.286	231.958	217.974	289.666	699.437	429.575	838.167	1170.22
423	8612.41	34556.3	23244.4	21923.2	28967.3	69907.1	42844.7	83776.4	117108													423	86.1241	345.563	232.444	219.232	289.673	699.071	428.447	837.764	1171.08
424	8565.41	34448.4	23138.3	21888.1	28752.7	69940.3	42924.1	83713.3	117266													424	85.6541	344.484	231.383	218.881	287.527	699.403	429.241	837.133	1172.66
425	8587.48	34579.4	23110.8	21767.4	28963.9	69973.4	42891	83775	117068													425	85.8748	345.794	231.108	217.674	289.639	699.734	428.91	837.75	1170.68
426	8585.81	34555.5	23150.4	21949.5	28821.5	69930.4	43005.6	83792.8	117108													426	85.8581	345.555	231.504	219.495	288.215	699.304	430.056	837.928	1171.08
427	8618.55	34515.6	23175	21855.1	28953	69930	42958.4	83802.1	117222													427	86.1855	345.156	231.75	218.551	289.53	699.3	429.584	838.021	1172.22
428	8604.49	34462.8	23053.6	21777.6	28871.7	69762.2	43031.6	83911.6	117105													428	86.0449	344.628	230.536	217.776	288.717	697.622	430.316	839.116	1171.05
429	8563.96	34506.5	23019.3	21868	28911.3	70091.1	42888.2	83613.9	116984													429	85.6396	345.065	230.193	218.68	289.113	700.911	428.882	836.139	1169.84
430	8629.67	34522.9	23072.1	21850.4	29035.9	70046.8	42982.9	83673.7	116878													430	86.2967	345.229	230.721	218.504	290.359	700.468	429.829	836.737	1168.78
431	8615.02	34600.4	23055.2	21831.4	28942.2	69965.4	42862.1	83704.6	117077													431	86.1502	346.004	230.552	218.314	289.422	699.654	428.621	837.046	1170.77
432	8652.94	34473.7	23117.8	21904.1	28924.3	70009.6	42904.4	83825.6	117156													432	86.5294	344.737	231.178	219.041	289.243	700.096	429.044	838.256	1171.56
433	8574.05	34399.1	23151.7	21834.6	28913	69915	42968.6	83858	117178													433	85.7405	343.991	231.517	218.346	289.13	699.15	429.686	838.58	1171.78
434	8589.65	34623.5	23086.7	21834.1	28747.9	69921.7	43031.7	83809.9	116982													434	85.8965	346.235	230.867	218.341	287.479	699.217	430.317	838.099	1169.82
435	8661.51	34472.7	23094.2	21767.7	28979.7	69943.1	42876.4	83710.3	117025													435	86.6151	344.727	230.942	217.677	289.797	699.431	428.764	837.103	1170.25
436	8551.19	34442.2	23124.1	21846.7	28855	69765.6	42882.4	83535.7	116998													436	85.5119	344.422	231.241	218.467	288.55	697.656	428.824	835.357	1169.98
437	8642.32	34583.8	23147.6	21889.2	28923.3	69872.4	42782.9	83679.3	116950													437	86.4232	345.838	231.476	218.892	289.233	698.724	427.829	836.793	1169.5
438	8552.59	34532.7	23027.9	21817.5	28921.5	69787.3	42956.9	83707	117021													438	85.5259	345.327	230.279	218.175	289.215	697.873	429.569	837.07	1170.21
439	8624.35	34457.9	23114.8	21982.7	28933	69668.3	42778.5	83714.4	117070													439	86.2435	344.579	231.148	219.827	289.33	696.683	427.785	837.144	1170.69
440	8599.04	34489.1	23177.6	21763.9	28855.5	69907.8	42844.1	83792	116864													440	85.9904	344.891	231.776	217.639	288.555	699.078	428.441	837.92	1168.64
441	8598.56	34428.6	23117.5	21848.4	28912	69892.2	42907.3	83640.8	116900													441	85.9856	344.286	231.175	218.484	289.12	698.922	429.073	836.408	1169
442	8617.5	34513.4	23150.6	21883.1	28726	69860.4	42933.5	83659.9	116882													442	86.175	345.134	231.506	218.831	287.26	698.604	429.335	836.599	1168.82
443	8548.07	34422.8	23026.3	21852.9	28881.9	69765.4	42731.8	83538.4	117080													443	85.4807	344.228	230.263	218.529	288.819	697.654	427.318	835.384	1170.8
444	8595.66	34494.1	23011.9	21855.4	28847.7	69884.3	42931.4	83776.5	116826													444	85.9566	344.941	230.119	218.554	288.477	698.843	429.314	837.765	1168.26
445	8580.64	34565	23067.1	21876.6	28823.2	69893.7	42910	83627.7	116844													445	85.8064	345.65	230.671	218.766	288.233	698.937	429.1	836.277	1168.44
446	8579.18	34482	23030.2	21742.3	28803.1	69991.8	42870.6	83756.1	116855													446	85.7918	344.82	230.302	217.423	288.031	699.918	428.706	837.561	1168.55
447	8609.01	34427.6	23171.2	21799.2	28892.4	69895.1	42800.8	83660.7	116815													447	86.0901	344.276	231.712	217.992	288.924	698.951	428.008	836.607	1168.15
448	8557.95	34517.5	23112.8	21752	28879.4	69858.5	42732	83630.9	116805													448	85.5795	345.175	231.128	217.52	288.794	698.585	427.32	836.309	1168.05
449	8529.43	34460	23220	21816.7	28800.1	69745.2	42905.4	83464.6	116963													449	85.2943	344.6	232.2	218.167	288.001	697.452	429.054	834.646	1169.63
450	8578.66	34428.8	23058.9	21715.9	28790.6	69927.2	42841.7	83485	116836													450	85.7866	344.288	230.589	217.159	287.906	699.272	428.417	834.85	1168.36
451	8559.43	34433.2	23073.8	21801.9	28819.8	69803.4	42830.7	83664.4	116861													451	85.5943	344.332	230.738	218.019	288.198	698.034	428.307	836.644	1168.61
452	8525.07	34491.1	23088.4	21791.7	28871.2	69801.6	42937.1	83437	116842													452	85.2507	344.911	230.884	217.917	288.712	698.016	429.371	834.37	1168.42
453	8552.34	34549.8	23076.7	21759.7	28855.1	69804.9	42893.8	83353.9	116937													453	85.5234	345.498	230.767	217.597	288.551	698.049	428.938	833.539	1169.37
454	8553.35	34517.1	23168.1	21748.4	28803.1	69783.3	42698.7	83556.3	116830													454	85.5335	345.171	231.681	217.484	288.031	697.833	426.987	835.563	1168.3
455	8545.89	34377.8	23099.1	21864.6	28900.3	69800.4	42858.4	83421.1	116600													455	85.4589	343.778	230.991	218.646	289.003	698.004	428.584	834.211	1166
456	8589.15	34482.9	23133.3	21796.9	28768.2	69849.2	42833	83710	116678													456	85.8915	344.829	231.333	217.969	287.682	698.492	428.33	837.1	1166.78
457	8628.25	34524.3	23063.2	21801.6	28821	69964.3	42920.8	83490.3	116942													457	86.2825	345.243	230.632	218.016	288.21	699.643	429.208	834.903	1169.42
458	8577.52	34437.6	23175.2	21737.8	28796.8	69885.6	42810.2	83568.2	116766													458	85.7752	344.376	231.752	217.378	287.968	698.856	428.102	835.682	1167.66
459	8620.62	34487.9	23031.5	21746.2	28737.2	69836.2	42791.5	83605.8	116849													459	86.2062	344.879	230.315	217.462	287.372	698.362	427.915	836.058	1168.49
460	8576.39	34510.2	23014.5	21791.9	28886.1	69695.4	42877.2	83629.4	116876													460	85.7639	345.102	230.145	217.919	288.861	696.954	428.772	836.294	1168.76
461	8565.07	34404.1	23015.6	21817.4	28880.6	69890	42786.2	83570.2	116598													461	85.6507	344.041	230.156	218.174	288.806	698.9	427.862	835.702	1165.98
462	8560.47	34517.2	23094.2	21755	28827.5	69806.8	42864	83298.7	116715													462	85.6047	345.172	230.942	217.55	288.275	698.068	428.64	832.987	1167.15
463	8539.84	34477.6	23102.3	21805.4	28862.3	69775.7	42781.8	83472.5	116670													463	85.3984	344.776	231.023	218.054	288.623	697.757	427.818	834.725	1166.7
464	8557.14	34514.5	23115.7	21794.7	28742.2	69723.4	42851.5	83545	116854													464	85.5714	345.145	231.157	217.947	287.422	697.234	428.515	835.45	1168.54
465	8518.95	34507.2	23079.4	21808	28782.4	69543.6	42710.8	83464.3	116519													465	85.1895	345.072	230.794	218.08	287.824	695.436	427.108	834.643	1165.19
466	8594.9	34446.9	23036.7	21787.5	28910.3	69640.5	42819.5	83625.6	116698													466	85.949	344.469	230.367	217.875	289.103	696.405	428.195	836.256	1166.98
467	8525.92	34465	23177.8	21831.5	28864.2	69601.2	42790.8	83430.3	116624													467	85.2592	344.65	231.778	218.315	288.642	696.012	427.908	834.303	1166.24
468	8527.36	34510.5	23007	21796.8	28817.9	69570.3	42943.1	83392	116545													468	85.2736	345.105	230.07	217.968	288.179	695.703	429.431	833.92	1165.45
469	8484.87	34345	22972.8	21742.7	28924.2	69856	42766.9	83514.2	116676													469	84.8487	343.45	229.728	217.427	289.242	698.56	427.669	835.142	1166.76
470	8577.05	34420.8	23097.1	21780.3	28757.1	69644.7	42684.3	83449.1	116500													470	85.7705	344.208	230.971	217.803	287.571	696.447	426.843	834.491	1165
471	8490.83	34427.8	23021	21820.3	28773	69617.4	42757.7	83606.3	116777													471	84.9083	344.278	230.21	218.203	287.73	696.174	427.577	836.063	1167.77
472	8531.72	34349.9	23090	21729.6	28815.2	69791.5	42789.5	83425.4	116558													472	85.3172	343.499	230.9	217.296	288.152	697.915	427.895	834.254	1165.58
473	8529.28	34467.5	23060.5	21756.1	28831.1	69616.2	42757.2	83286.9	116402													473	85.2928	344.675	230.605	217.561	288.311	696.162	427.572	832.869	1164.02
474	8591.96	34530.1	23055	21797.1	28781.4	69674.4	42726.7	83412.3	116484													474	85.9196	345.301	230.55	217.971	287.814	696.744	427.267	834.123	1164.84
475	8559.3	34370.9	23020.8	21767.3	28864.5	69693.4	42747.6	83386.8	116510													475	85.593	343.709	230.208	217.673	288.645	696.934	427.476	833.868	1165.1
476	8531.66	34443.7	23051	21752.8	28823.3	69508.5	42823.3	83456.9	116482													476	85.3166	344.437	230.51	217.528	288.233	695.085	428.233	834.569	1164.82
477	8571.38	34395.6	23107.9	21792.9	28802	69714	42691.5	83347.4	116587													477	85.7138	343.956	231.079	217.929	288.02	697.14	426.915	833.474	1165.87
478	8521.02	34405.7	23045.1	21736.7	28828.9	69747.8	42767.8	83453.1	116614													478	85.2102	344.057	230.451	217.367	288.289	697.478	427.678	834.531	1166.14
479	8561.14	34471.2	22970.1	21779.2	28761.6	69652.3	42637.2	83417.4	116412													479	85.6114	344.712	229.701	217.792	287.616	696.523	426.372	834.174	1164.12
480	8488.38	34431.8	23159.8	21869.2	28908.9	69442.2	42698.5	83375.4	116354													480	84.8838	344.318	231.598	218.692	289.089	694.422	426.985	833.754	1163.54
481	8541.01	34352	23133.2	21799	28819.1	69603.1	42703.4	83305.9	116509													481	85.4101	343.52	231.332	217.99	288.191	696.031	427.034	833.059	1165.09
482	8540.72	34370.2	23001	21753.8	28860.7	69721	42742.3	83322.1	116550													482	85.4072	343.702	230.01	217.538	288.607	697.21	427.423	833.221	1165.5
483	8573.82	34323.8	23053.7	21895	28804.5	69583.8	42724.8	83349.6	116634													483	85.7382	343.238	230.537	218.95	288.045	695.838	427.248	833.496	1166.34
484	8570.95	34370.8	23116.8	21774.5	28702.6	69656.5	42706.1	83246.8	116531													484	85.7095	343.708	231.168	217.745	287.026	696.565	427.061	832.468	1165.31
485	8545.66	34505.2	23024.1	21719.7	28726.7	69652.2	42728.5	83439.5	116334													485	85.4566	345.052	230.241	217.197	287.267	696.522	427.285	834.395	1163.34
486	8568.86	34425.2	23042.7	21802.9	28827.4	69589.9	42757.1	83200.4	116453													486	85.6886	344.252	230.427	218.029	288.274	695.899	427.571	832.004	1164.53
487	8556.98	34422.3	23142.7	21797.1	28720.2	69457.5	42755.8	83349.8	116295													487	85.5698	344.223	231.427	217.971	287.202	694.575	427.558	833.498	1162.95
488	8559.56	34336.5	23058.9	21779	28798.3	69611.4	42701.7	83285.9	116286													488	85.5956	343.365	230.589	217.79	287.983	696.114	427.017	832.859	1162.86
489	8528.6	34442.2	23045.5	21712.6	28798.5	69539.1	42684.8	83314.9	116306													489	85.286	344.422	230.455	217.126	287.985	695.391	426.848	833.149	1163.06
490	8533.95	34316	23007.9	21764	28750.8	69686.5	42729.8	83489.8	116233													490	85.3395	343.16	230.079	217.64	287.508	696.865	427.298	834.898	1162.33
491	8574.21	34348.8	22955.1	21833.9	28742.2	69603.9	42650.3	83267.9	116344													491	85.7421	343.488	229.551	218.339	287.422	696.039	426.503	832.679	1163.44
492	8577.88	34429	22995.8	21694.6	28843.4	69464.4	42668.2	83372.7	116202													492	85.7788	344.29	229.958	216.946	288.434	694.644	426.682	833.727	1162.02
493	8569.97	34380.4	23028.3	21764.6	28863.4	69594.9	42877.5	83362.9	116307													493	85.6997	343.804	230.283	217.646	288.634	695.949	428.775	833.629	1163.07
494	8598.22	34466.2	23075	21777.7	28813.5	69574.8	42837	83325.1	116443													494	85.9822	344.662	230.75	217.777	288.135	695.748	428.37	833.251	1164.43
495	8554.72	34384.4	23032.1	21871.2	28919.2	69553.6	42584.4	83386.7	116296													495	85.5472	343.844	230.321	218.713	289.192	695.536	425.844	833.867	1162.96
496	8607.84	34370.4	23012	21833.6	28849.9	69492.5	42725.8	83265.6	116226													496	86.0784	343.704	230.12	218.336	288.499	694.925	427.258	832.656	1162.26
497	8555.29	34524.4	23030.7	21654.6	28835.6	69661.7	42755.9	83209.6	116262													497	85.5529	345.244	230.307	216.546	288.356	696.617	427.559	832.096	1162.62
498	8514.82	34304.6	23065.4	21703.4	28640.7	69723.6	42709.9	83163	116132													498	85.1482	343.046	230.654	217.034	286.407	697.236	427.099	831.63	1161.32
499	8587.38	34378.3	22991.2	21789.2	28739.3	69625.2	42676.4	83121.7	116146													499	85.8738	343.783	229.912	217.892	287.393	696.252	426.764	831.217	1161.46
500	8522.7	34232.6	23061.4	21732.7	28730.2	69454.9	42635.2	83409.8	116113													500	85.227	342.326	230.614	217.327	287.302	694.549	426.352	834.098	1161.13
501	8508.53	34346.2	23040.2	21818.6	28771.8	69436.6	42529.3	83277.8	116173													501	85.0853	343.462	230.402	218.186	287.718	694.366	425.293	832.778	1161.73
502	8539.07	34402.6	23039.9	21833.4	28709.3	69536.8	42754.3	83193.4	116144													502	85.3907	344.026	230.399	218.334	287.093	695.368	427.543	831.934	1161.44
503	8558.67	34352.8	23089.4	21894.2	28684.8	69590.7	42695.5	83297.2	116171													503	85.5867	343.528	230.894	218.942	286.848	695.907	426.955	832.972	1161.71
504	8553.04	34282.4	23053.8	21812.3	28828.9	69492.4	42695.4	83240.7	116229													504	85.5304	342.824	230.538	218.123	288.289	694.924	426.954	832.407	1162.29
505	8610.26	34379.9	22926.8	21744.6	28796.8	69472	42686.4	83228	116011													505	86.1026	343.799	229.268	217.446	287.968	694.72	426.864	832.28	1160.11
506	8501.52	34279.6	23048.4	21843.5	28690.1	69531.1	42640	83410.9	115971													506	85.0152	342.796	230.484	218.435	286.901	695.311	426.4	834.109	1159.71
507	8573.94	34441.6	23026.4	21762.2	28767	69461.9	42648.4	83129.5	116061													507	85.7394	344.416	230.264	217.622	287.67	694.619	426.484	831.295	1160.61
508	8588.88	34366.8	23040.1	21759.5	28817.8	69390.3	42594.4	83258.9	116174													508	85.8888	343.668	230.401	217.595	288.178	693.903	425.944	832.589	1161.74
509	8519.72	34475.4	23028.5	21752.1	28886.1	69451.4	42691.3	83046.7	116065													509	85.1972	344.754	230.285	217.521	288.861	694.514	426.913	830.467	1160.65
510	8576.51	34382	23111.2	21740.8	28777.9	69488.9	42719	83142.2	116025													510	85.7651	343.82	231.112	217.408	287.779	694.889	427.19	831.422	1160.25
511	8507.31	34308.7	23092.8	21722.2	28768.7	69407.4	42583.9	83326.7	116027													511	85.0731	343.087	230.928	217.222	287.687	694.074	425.839	833.267	1160.27
512	8531.25	34414.8	22977.4	21734.2	28788.4	69629.2	42599.4	83177.4	115838													512	85.3125	344.148	229.774	217.342	287.884	696.292	425.994	831.774	1158.38
513	8516.87	34356.4	23022.6	21826	28714.8	69509.3	42602.7	83183.9	116125													513	85.1687	343.564	230.226	218.26	287.148	695.093	426.027	831.839	1161.25
514	8549.88	34410.2	23064.2	21835.3	28728.3	69329	42634.3	83212.7	116016													514	85.4988	344.102	230.642	218.353	287.283	693.29	426.343	832.127	1160.16
515	8548.18	34367	23040.2	21741.3	28754.4	69496.1	42705.5	83283.2	115897													515	85.4818	343.67	230.402	217.413	287.544	694.961	427.055	832.832	1158.97
516	8558.52	34266.1	23124.1	21742.3	28744.8	69521.1	42567	83139.8	116174													516	85.5852	342.661	231.241	217.423	287.448	695.211	425.67	831.398	1161.74
517	8605.13	34265.6	23090.4	21709.1	28718.9	69349.6	42603.2	83209.5	115959													517	86.0513	342.656	230.904	217.091	287.189	693.496	426.032	832.095	1159.59
518	8565.08	34344.5	22970.2	21771.8	28711.9	69520.2	42639.9	83218.6	115915													518	85.6508	343.445	229.702	217.718	287.119	695.202	426.399	832.186	1159.15
519	8544.12	34319.3	23025.8	21760.2	28804.8	69528.9	42631.1	83178.2	116043													519	85.4412	343.193	230.258	217.602	288.048	695.289	426.311	831.782	1160.43
520	8569.78	34361.3	23051.3	21703.5	28790	69368	42491.7	83166.9	116192													520	85.6978	343.613	230.513	217.035	287.9	693.68	424.917	831.669	1161.92
521	8521.55	34289.4	23057.7	21720	28775.7	69359.1	42609.1	83262.7	115781													521	85.2155	342.894	230.577	217.2	287.757	693.591	426.091	832.627	1157.81
522	8603.88	34287	23089	21742.5	28734	69453.8	42621	83054.5	115843													522	86.0388	342.87	230.89	217.425	287.34	694.538	426.21	830.545	1158.43
523	8519.38	34234.1	23027.4	21675.2	28734.9	69372.9	42630.6	83189.1	115950													523	85.1938	342.341	230.274	216.752	287.349	693.729	426.306	831.891	1159.5
524	8564.11	34238.9	23113.5	21742.3	28748.4	69364.7	42408.8	83135.2	116107													524	85.6411	342.389	231.135	217.423	287.484	693.647	424.088	831.352	1161.07
525	8528.29	34358.5	23021.8	21761.3	28803.6	69479.4	42584	83141.9	115824													525	85.2829	343.585	230.218	217.613	288.036	694.794	425.84	831.419	1158.24
526	8551.62	34266.8	23101.3	21770.2	28821.6	69352.3	42647.2	83119.5	115859													526	85.5162	342.668	231.013	217.702	288.216	693.523	426.472	831.195	1158.59
527	8532.62	34301.6	23037.6	21772.1	28827.4	69377.8	42618.8	83189.2	115726													527	85.3262	343.016	230.376	217.721	288.274	693.778	426.188	831.892	1157.26
528	8538.28	34346.5	23018.5	21651.5	28762.2	69320	42498.4	83297.9	115657													528	85.3828	343.465	230.185	216.515	287.622	693.2	424.984	832.979	1156.57
529	8566.79	34360.6	22985.4	21744.7	28778	69426.7	42526.7	82940.2	115816													529	85.6679	343.606	229.854	217.447	287.78	694.267	425.267	829.402	1158.16
530	8615.36	34450	23065.6	21775.6	28767.3	69259.2	42642.6	82922.2	115971													530	86.1536	344.5	230.656	217.756	287.673	692.592	426.426	829.222	1159.71
531	8549.71	34382.7	23001.9	21806.5	28792.1	69440.8	42534.5	83101.4	115779													531	85.4971	343.827	230.019	218.065	287.921	694.408	425.345	831.014	1157.79
532	8542.39	34321.6	23139	21664.2	28700.9	69498.1	42630.2	83151.2	115735													532	85.4239	343.216	231.39	216.642	287.009	694.981	426.302	831.512	1157.35
533	8499.53	34305.3	23076.6	21727.9	28750.7	69375	42475.7	83019.1	115848													533	84.9953	343.053	230.766	217.279	287.507	693.75	424.757	830.191	1158.48
534	8564.06	34343.9	22980.1	21749.9	28770.2	69347.7	42524.3	82934.2	115731													534	85.6406	343.439	229.801	217.499	287.702	693.477	425.243	829.342	1157.31
535	8495.47	34153.5	23027.5	21692	28682.1	69191.8	42554.8	83019.1	115872													535	84.9547	341.535	230.275	216.92	286.821	691.918	425.548	830.191	1158.72
536	8492.46	34290.4	23017.5	21776.5	28645.8	69328.9	42623.2	83216	115740													536	84.9246	342.904	230.175	217.765	286.458	693.289	426.232	832.16	1157.4
537	8522.6	34251.4	23068.2	21728.7	28731	69390.8	42641.5	83025.2	115625													537	85.226	342.514	230.682	217.287	287.31	693.908	426.415	830.252	1156.25
538	8574.47	34408	23016.6	21745.3	28649.6	69400.4	42437.2	83274.9	115792													538	85.7447	344.08	230.166	217.453	286.496	694.004	424.372	832.749	1157.92
539	8441.79	34310.8	23069.2	21722.6	28735.5	69392.2	42682.3	83075.6	115662													539	84.4179	343.108	230.692	217.226	287.355	693.922	426.823	830.756	1156.62
540	8522.67	34276.5	23042.5	21718.4	28738.2	69393.3	42587.7	82930.8	115639													540	85.2267	342.765	230.425	217.184	287.382	693.933	425.877	829.308	1156.39
541	8557.83	34252.3	23089.2	21837	28763.9	69349	42713.1	83027	115454													541	85.5783	342.523	230.892	218.37	287.639	693.49	427.131	830.27	1154.54
542	8587.85	34308.6	22985.7	21660.5	28650.2	69348.1	42600.1	83118.1	115593													542	85.8785	343.086	229.857	216.605	286.502	693.481	426.001	831.181	1155.93
543	8564.45	34248.1	22994.4	21774.3	28719.4	69434.1	42686.3	83105.7	115626													543	85.6445	342.481	229.944	217.743	287.194	694.341	426.863	831.057	1156.26
544	8564.36	34342.3	22934.7	21736.8	28792.2	69251.6	42481.1	83167.1	115696													544	85.6436	343.423	229.347	217.368	287.923	692.516	424.811	831.671	1156.96
545	8557.66	34298.8	23078	21663.2	28682.4	69283.8	42672.5	83212.2	115580													545	85.5766	342.988	230.78	216.632	286.824	692.837	426.725	832.122	1155.8
546	8533.9	34328	23049.4	21710	28750	69451.3	42502.5	83041.7	115629													546	85.339	343.28	230.494	217.1	287.5	694.513	425.025	830.417	1156.29
547	8555.85	34291.8	23018.3	21705.4	28750.4	69258.2	42620.9	82755	115581													547	85.5585	342.918	230.183	217.054	287.504	692.582	426.209	827.55	1155.81
548	8553.25	34248.4	23034.6	21732.1	28636	69404.9	42526.7	83079.4	115813													548	85.5325	342.484	230.346	217.321	286.36	694.049	425.267	830.794	1158.13
549	8477.91	34232.8	22968.6	21717.7	28766.8	69495.4	42528.6	83057.5	115654													549	84.7791	342.328	229.686	217.177	287.668	694.954	425.286	830.575	1156.54
550	8535.04	34152.9	22981.6	21651.3	28756.1	69468	42593.9	83162.5	115624													550	85.3504	341.529	229.816	216.513	287.561	694.68	425.939	831.625	1156.24
551	8526.4	34390.3	22946.4	21688.8	28720.1	69292.6	42567.7	83053.8	115551													551	85.264	343.903	229.464	216.888	287.201	692.926	425.677	830.538	1155.51
552	8515.75	34388.9	23029.7	21759.9	28874.2	69358	42406.6	82946.6	115481													552	85.1575	343.889	230.297	217.599	288.742	693.58	424.066	829.466	1154.81
553	8583.9	34224.1	22942.2	21765.5	28716.9	69149.1	42504.3	82973.9	115574													553	85.839	342.241	229.422	217.655	287.169	691.491	425.043	829.739	1155.73
554	8532.74	34334.6	22990.7	21774.5	28725.2	69252.1	42547.4	83006.3	115597													554	85.3274	343.346	229.907	217.745	287.252	692.521	425.474	830.063	1155.97
555	8543.34	34204.5	23041.7	21843.2	28740	69302.5	42526.3	82943.1	115535													555	85.4334	342.045	230.417	218.432	287.4	693.025	425.263	829.431	1155.35
556	8540.35	34269.6	23042.4	21825.7	28787	69387.1	42578.8	82907.7	115496													556	85.4035	342.696	230.424	218.257	287.87	693.871	425.788	829.077	1154.96
557	8520.37	34305.3	23010.5	21590.9	28676.3	69269.1	42494.7	82842.3	115278													557	85.2037	343.053	230.105	215.909	286.763	692.691	424.947	828.423	1152.78
558	8555.33	34263.8	23006.2	21696.6	28802.5	69279.3	42455.8	82828.4	115684													558	85.5533	342.638	230.062	216.966	288.025	692.793	424.558	828.284	1156.84
559	8534.38	34206.6	23082	21743.7	28570.3	69162.8	42600.8	82835.8	115514													559	85.3438	342.066	230.82	217.437	285.703	691.628	426.008	828.358	1155.14
560	8510.22	34205	22955.2	21705.5	28703.7	69055.8	42575.5	83167	115680													560	85.1022	342.05	229.552	217.055	287.037	690.558	425.755	831.67	1156.8
561	8563.39	34246.3	23019.9	21746.8	28621.6	69233	42613.5	82915.2	115577													561	85.6339	342.463	230.199	217.468	286.216	692.33	426.135	829.152	1155.77
562	8486.93	34297	23053.5	21697.6	28714.1	69256.2	42594.6	82945.7	115519													562	84.8693	342.97	230.535	216.976	287.141	692.562	425.946	829.457	1155.19
563	8548.31	34241	23041	21738.3	28722.7	69177.3	42592.1	83017.7	115354													563	85.4831	342.41	230.41	217.383	287.227	691.773	425.921	830.177	1153.54
564	8484.67	34282.1	22997.3	21711.9	28682	69181.2	42402	82936.4	115723													564	84.8467	342.821	229.973	217.119	286.82	691.812	424.02	829.364	1157.23
565	8531.49	34257.4	23102	21717.5	28705.5	69079.9	42558.8	82967.6	115429													565	85.3149	342.574	231.02	217.175	287.055	690.799	425.588	829.676	1154.29
566	8505.29	34152.7	23029.9	21671.8	28664	69127.7	42592.9	83081.4	115473													566	85.0529	341.527	230.299	216.718	286.64	691.277	425.929	830.814	1154.73
567	8534.7	34202.6	22965.6	21760.2	28683.5	69137.4	42466.6	83051.2	115290													567	85.347	342.026	229.656	217.602	286.835	691.374	424.666	830.512	1152.9
568	8582.36	34276.4	23014.4	21749.2	28690.5	69139.1	42425.2	82872.8	115251													568	85.8236	342.764	230.144	217.492	286.905	691.391	424.252	828.728	1152.51
569	8532.63	34162.7	22879.8	21693.7	28697	69302.9	42451.8	82912.7	115379													569	85.3263	341.627	228.798	216.937	286.97	693.029	424.518	829.127	1153.79
570	8628.26	34262.7	23075.6	21738.6	28812.1	69096.8	42428.4	82675.3	115498													570	86.2826	342.627	230.756	217.386	288.121	690.968	424.284	826.753	1154.98
571	8518.64	34305.2	22996	21709.2	28726.8	69232.6	42498	82873.4	115315													571	85.1864	343.052	229.96	217.092	287.268	692.326	424.98	828.734	1153.15
572	8446.59	34237.2	22988.4	21671.3	28566.1	69136.4	42474.4	82911	115325													572	84.4659	342.372	229.884	216.713	285.661	691.364	424.744	829.11	1153.25
573	8537.59	34330.2	23000.3	21732.6	28764.2	69072.3	42499.3	82760	115168													573	85.3759	343.302	230.003	217.326	287.642	690.723	424.993	827.6	1151.68
574	8522.92	34166.3	23037.6	21728.5	28627.6	69078.3	42413.6	82831.6	115306													574	85.2292	341.663	230.376	217.285	286.276	690.783	424.136	828.316	1153.06
575	8571.04	34220.2	22989.8	21723.8	28599.5	69127.9	42573.2	82889.1	115258													575	85.7104	342.202	229.898	217.238	285.995	691.279	425.732	828.891	1152.58
576	8517.63	34222.8	22951.2	21721.4	28659	69150.5	42339.6	82794.2	115354													576	85.1763	342.228	229.512	217.214	286.59	691.505	423.396	827.942	1153.54
577	8545.07	34294.1	22901.1	21622	28668.5	69077.3	42456.2	82838.2	115187													577	85.4507	342.941	229.011	216.22	286.685	690.773	424.562	828.382	1151.87
578	8462.69	34185.2	23006.8	21724.7	28708.5	69243.5	42480.9	82774.7	115186													578	84.6269	341.852	230.068	217.247	287.085	692.435	424.809	827.747	1151.86
579	8557.31	34315.7	23015	21656.9	28586.4	69146.8	42427.8	82912.3	115300													579	85.5731	343.157	230.15	216.569	285.864	691.467	424.278	829.123	1153
580	8538.82	34275.2	22982.2	21734	28606.5	69176.7	42379.3	82793	115147													580	85.3882	342.752	229.822	217.34	286.065	691.767	423.793	827.93	1151.47
581	8481.03	34293.1	23054.8	21723	28713.8	69015.5	42508	82885.7	115332													581	84.8103	342.931	230.548	217.23	287.138	690.155	425.08	828.857	1153.32
582	8516.78	34173.1	23051.2	21643.4	28758.9	69131.5	42486.6	82772.8	115145													582	85.1678	341.731	230.512	216.434	287.589	691.315	424.866	827.728	1151.45
583	8554.83	34218.6	23011.1	21767.1	28603.1	69066.4	42580.7	82765.2	115106													583	85.5483	342.186	230.111	217.671	286.031	690.664	425.807	827.652	1151.06
584	8552.46	34250.1	22943.9	21783.9	28584.5	69295.1	42513.5	82892	115200													584	85.5246	342.501	229.439	217.839	285.845	692.951	425.135	828.92	1152
585	8533.29	34245.5	23008.5	21590.6	28673.1	69158.1	42413.4	82733.5	114995													585	85.3329	342.455	230.085	215.906	286.731	691.581	424.134	827.335	1149.95
586	8474.03	34175.2	22993.7	21680.3	28595	68943	42422.8	82830.9	115306													586	84.7403	341.752	229.937	216.803	285.95	689.43	424.228	828.309	1153.06
587	8546.41	34241.9	22981.9	21670.9	28668.3	69029.3	42400.6	82753.2	115208													587	85.4641	342.419	229.819	216.709	286.683	690.293	424.006	827.532	1152.08
588	8514.81	34141	23014.5	21656.8	28601.3	69012.6	42561.4	82921.8	115066													588	85.1481	341.41	230.145	216.568	286.013	690.126	425.614	829.217	1150.66
589	8463.02	34281.6	23005.9	21748.2	28648.2	68968.5	42555.8	82875.4	115121													589	84.6302	342.816	230.059	217.482	286.482	689.685	425.558	828.754	1151.21
590	8508.77	34241.5	23037.4	21645.8	28641.1	69150.8	42469.8	82881	115241													590	85.0877	342.415	230.374	216.458	286.411	691.508	424.698	828.81	1152.41
591	8568.3	34164.3	22954.3	21764.7	28689.9	69088	42484	82739.8	115300													591	85.683	341.643	229.543	217.647	286.899	690.88	424.84	827.398	1153
592	8485.5	34273.4	23065.6	21649.5	28607.8	69056	42423.3	82721.6	114989													592	84.855	342.734	230.656	216.495	286.078	690.56	424.233	827.216	1149.89
593	8501.78	34221.2	23003.3	21650.9	28679.5	69107.1	42466	82657.7	115055													593	85.0178	342.212	230.033	216.509	286.795	691.071	424.66	826.577	1150.55
594	8522.24	34309	22935.6	21722.2	28720.4	69137.3	42562.5	82805.8	115168													594	85.2224	343.09	229.356	217.222	287.204	691.373	425.625	828.058	1151.68
595	8476.93	34197.1	22923.8	21619.4	28632.7	68920	42416.4	82606.7	115197													595	84.7693	341.971	229.238	216.194	286.327	689.2	424.164	826.067	1151.97
596	8521.91	34250.8	23008.4	21683	28694.8	68982.5	42499.4	82677.2	115102													596	85.2191	342.508	230.084	216.83	286.948	689.825	424.994	826.772	1151.02
597	8495.2	34257.3	23028.7	21677.2	28604.4	68977.3	42363.9	82878.1	114914													597	84.952	342.573	230.287	216.772	286.044	689.773	423.639	828.781	1149.14
598	8538.07	34215.3	22918.6	21618.2	28674.8	69054.6	42410.3	82802.4	115104													598	85.3807	342.153	229.186	216.182	286.748	690.546	424.103	828.024	1151.04
599	8509.45	34224.3	22982.2	21681.2	28551.3	68917.7	42277	82692.6	115017													599	85.0945	342.243	229.822	216.812	285.513	689.177	422.77	826.926	1150.17
600	8526.31	34212.7	23019.6	21595	28501.5	68970.9	42429.1	82670.8	115141													600	85.2631	342.127	230.196	215.95	285.015	689.709	424.291	826.708	1151.41
