# Supplementary material for: Daptomycin forms a stable complex with phosphatidylglycerol for selective uptake to bacterial membrane
Source: eLife. 2025 Jun 2;13:RP93267. doi: 10.7554/eLife.93267 (PMC12129450; doi:10.7554/eLife.93267)
Supplement: Figure 2—source data 5. [file elife-93267-fig2-data5.xlsx]

## Sheet: oveall 1 sec
ProDataCSV
Title:
Remarks:
User: Chirascan User
#HV (CDDC channel): 999.985
#Samples per point: 80
#Sample period: 25.0 us
#Temperature: 21.19 C
#Cell type: Stopped Flow
#Pathlength: 10
Time Stamp : 2022/10/15 22:27:17
The data was saved to file : F:\Pragya\15 oct 2022\num 24.dsx.
Time Stamp : 2022/10/15 23:29:39
The data was saved to file : F:\Pragya\15 oct 2022\oveall 1 sec.dsx.
Last Modified: Mon Oct 17 10:48:20 2022 by unknown.
Options:
Available Dimensions:	2
Time	500 time points over 1s	linear	oversampled	external trigger	pressure hold off (pressure released immediately)
Wavelength	Wavelength: 365nm - 367nm	Step Size: 1nm	Bandwidth: 4nm
Available Properties:	1
Fluorescence
Data:
Fluorescence
Time	Wavelength
	365	num 7 one of one.dsx::	num 30.dsx::
0.002	0.127625	0.132122	0.131482
0.004	0.130131	0.134633	0.132366
0.006	0.129387	0.139756	0.133934
0.008	0.128071	0.142151	0.13271
0.01	0.128884	0.144078	0.131798
0.012	0.128632	0.145043	0.131069
0.014	0.129895	0.145123	0.131574
0.016	0.129502	0.145268	0.130913
0.018	0.126946	0.144227	0.131336
0.02	0.127563	0.144272	0.132432
0.022	0.130154	0.145326	0.1349
0.024	0.130119	0.147386	0.135427
0.026	0.131489	0.146626	0.133851
0.028	0.131714	0.148129	0.1335
0.03	0.13007	0.148754	0.134305
0.032	0.129021	0.150772	0.130749
0.034	0.128274	0.150433	0.131791
0.036	0.128227	0.149697	0.130684
0.038	0.129048	0.150174	0.132904
0.04	0.128911	0.150235	0.133507
0.042	0.129399	0.149037	0.134721
0.044	0.131997	0.149853	0.136296
0.046	0.131836	0.150495	0.134495
0.048	0.132279	0.15101	0.13501
0.05	0.131356	0.153732	0.13496
0.052	0.129452	0.154072	0.132332
0.054	0.128952	0.153599	0.131222
0.056	0.128819	0.153404	0.131997
0.058	0.129212	0.152974	0.132874
0.06	0.128574	0.151989	0.133568
0.062	0.131168	0.151757	0.136292
0.064	0.13268	0.152352	0.136639
0.066	0.130634	0.153961	0.134228
0.068	0.1298	0.153931	0.134763
0.07	0.13057	0.155213	0.133129
0.072	0.128808	0.154183	0.131874
0.074	0.129219	0.156475	0.132207
0.076	0.126119	0.154176	0.131867
0.078	0.127343	0.153813	0.134083
0.08	0.129483	0.154316	0.132881
0.082	0.129098	0.151681	0.134941
0.084	0.130715	0.152149	0.13504
0.086	0.131222	0.152848	0.134735
0.088	0.132217	0.155426	0.134457
0.09	0.130239	0.155674	0.133786
0.092	0.129899	0.155568	0.133519
0.094	0.129021	0.155149	0.133138
0.096	0.127579	0.155598	0.133313
0.098	0.129944	0.152787	0.133271
0.1	0.129746	0.153633	0.133797
0.102	0.130558	0.153645	0.13485
0.104	0.130936	0.153061	0.135605
0.106	0.129803	0.155022	0.135155
0.108	0.130764	0.155827	0.135269
0.11	0.129117	0.155296	0.13371
0.112	0.129476	0.15696	0.132332
0.114	0.128624	0.15429	0.131612
0.116	0.131474	0.15561	0.13168
0.118	0.129185	0.154351	0.134915
0.12	0.13028	0.15337	0.13329
0.122	0.130787	0.155171	0.134778
0.124	0.130882	0.153309	0.136395
0.126	0.131367	0.153413	0.1349
0.128	0.131943	0.155079	0.135621
0.13	0.130405	0.156239	0.132718
0.132	0.129555	0.155499	0.133656
0.134	0.129375	0.156609	0.130872
0.136	0.12798	0.15638	0.132833
0.138	0.128453	0.153966	0.133762
0.14	0.130787	0.153675	0.133114
0.142	0.129795	0.153115	0.136662
0.144	0.130497	0.154915	0.134579
0.146	0.13083	0.153633	0.133076
0.148	0.130554	0.15485	0.13324
0.15	0.12912	0.157464	0.133901
0.152	0.127988	0.157238	0.13173
0.154	0.128068	0.156059	0.132217
0.156	0.128846	0.154533	0.131669
0.158	0.128831	0.152127	0.132813
0.16	0.130452	0.153565	0.13303
0.162	0.13131	0.154393	0.134197
0.164	0.131726	0.152787	0.13469
0.166	0.130059	0.154164	0.134991
0.168	0.13086	0.156666	0.133488
0.17	0.129139	0.156643	0.13464
0.172	0.126873	0.155296	0.132866
0.174	0.127461	0.154424	0.133278
0.176	0.128083	0.153618	0.13371
0.178	0.129399	0.152981	0.132824
0.18	0.128765	0.153413	0.134823
0.182	0.130811	0.155029	0.135907
0.184	0.130528	0.154812	0.135583
0.186	0.129689	0.154686	0.135274
0.188	0.128239	0.156544	0.135765
0.19	0.127366	0.155991	0.135689
0.192	0.126816	0.156662	0.133317
0.194	0.128567	0.155385	0.132775
0.196	0.12722	0.155163	0.132436
0.198	0.128952	0.153809	0.13443
0.2	0.129654	0.152574	0.135071
0.202	0.130417	0.152882	0.138302
0.204	0.130825	0.154552	0.136292
0.206	0.128418	0.156437	0.136433
0.208	0.129552	0.15728	0.134373
0.21	0.129387	0.155636	0.134286
0.212	0.129132	0.15527	0.134057
0.214	0.127808	0.155782	0.134388
0.216	0.127362	0.153527	0.135144
0.218	0.128975	0.153847	0.13577
0.22	0.129677	0.155067	0.135617
0.222	0.129528	0.15287	0.13646
0.224	0.129933	0.154266	0.135773
0.226	0.129098	0.15698	0.136868
0.228	0.128193	0.156758	0.135815
0.23	0.128217	0.157956	0.134621
0.232	0.126313	0.15604	0.133367
0.234	0.12714	0.154934	0.134553
0.236	0.127751	0.154309	0.13514
0.238	0.128407	0.15408	0.135217
0.24	0.129216	0.152817	0.137764
0.242	0.129261	0.153337	0.136365
0.244	0.131527	0.154576	0.13483
0.246	0.12954	0.155869	0.134087
0.248	0.129006	0.155721	0.133996
0.25	0.128014	0.156243	0.134465
0.252	0.128212	0.155957	0.134572
0.254	0.128812	0.154138	0.132703
0.256	0.128491	0.151646	0.133615
0.258	0.128899	0.153687	0.134366
0.26	0.12864	0.153878	0.136311
0.262	0.130761	0.154812	0.13525
0.264	0.129944	0.157887	0.137386
0.266	0.1311	0.156533	0.136757
0.268	0.128098	0.158353	0.135376
0.27	0.13015	0.156689	0.134743
0.272	0.129269	0.156159	0.133367
0.274	0.128403	0.155797	0.134099
0.276	0.128498	0.155976	0.132999
0.278	0.130215	0.154552	0.133858
0.28	0.131302	0.154889	0.136471
0.282	0.132	0.157242	0.135182
0.284	0.132179	0.155976	0.135262
0.286	0.130658	0.158429	0.136677
0.288	0.129403	0.158124	0.136238
0.29	0.128503	0.158051	0.132871
0.292	0.12904	0.158162	0.132871
0.294	0.129498	0.156617	0.134454
0.296	0.129433	0.156274	0.13604
0.298	0.131688	0.153245	0.13392
0.3	0.132165	0.155149	0.135541
0.302	0.132138	0.157056	0.135285
0.304	0.132337	0.159383	0.134556
0.306	0.132885	0.158405	0.133648
0.308	0.132408	0.160141	0.133015
0.31	0.130681	0.160786	0.132833
0.312	0.130539	0.159062	0.132973
0.314	0.130665	0.157803	0.133259
0.316	0.131912	0.156151	0.133343
0.318	0.133084	0.155957	0.136346
0.32	0.134778	0.156879	0.136921
0.322	0.133587	0.15789	0.135617
0.324	0.13358	0.159539	0.136269
0.326	0.133656	0.162492	0.135663
0.328	0.132241	0.160881	0.133786
0.33	0.130825	0.161625	0.134263
0.332	0.130424	0.159127	0.134048
0.334	0.132394	0.158646	0.137074
0.336	0.13255	0.157762	0.135899
0.338	0.135678	0.157654	0.136013
0.34	0.133828	0.15862	0.137497
0.342	0.134858	0.157849	0.136143
0.344	0.13495	0.160336	0.136323
0.346	0.134118	0.160137	0.13715
0.348	0.13097	0.159794	0.135632
0.35	0.13337	0.159771	0.134892
0.352	0.133008	0.158528	0.135247
0.354	0.131409	0.156732	0.134766
0.356	0.134095	0.155118	0.13675
0.358	0.133256	0.156865	0.137017
0.36	0.136437	0.156999	0.137753
0.362	0.134373	0.158211	0.136852
0.364	0.133759	0.16153	0.13868
0.366	0.133538	0.157895	0.135354
0.368	0.132904	0.161164	0.134999
0.37	0.131493	0.158792	0.134724
0.372	0.134423	0.159733	0.135179
0.374	0.133305	0.157471	0.135708
0.376	0.134072	0.157155	0.135571
0.378	0.134636	0.156922	0.13905
0.38	0.135098	0.157013	0.138199
0.382	0.135564	0.159405	0.138326
0.384	0.135758	0.160317	0.137837
0.386	0.132176	0.16008	0.138574
0.388	0.131803	0.160366	0.136231
0.39	0.131829	0.161495	0.135278
0.392	0.132115	0.15992	0.135373
0.394	0.132	0.157723	0.137696
0.396	0.133377	0.15717	0.1377
0.398	0.135545	0.158936	0.138081
0.4	0.135281	0.159355	0.139893
0.402	0.134095	0.160832	0.139923
0.404	0.135059	0.160378	0.137105
0.406	0.133511	0.161999	0.139214
0.408	0.13207	0.161915	0.136197
0.41	0.132672	0.161297	0.13607
0.412	0.132191	0.160191	0.137081
0.414	0.132599	0.158677	0.138848
0.416	0.134225	0.157399	0.137013
0.418	0.135098	0.157647	0.139862
0.42	0.133771	0.159721	0.138116
0.422	0.134125	0.158081	0.139474
0.424	0.132675	0.162835	0.13873
0.426	0.1329	0.161504	0.137582
0.428	0.132604	0.161939	0.136623
0.43	0.131451	0.161492	0.135758
0.432	0.132489	0.160214	0.135933
0.434	0.133343	0.157814	0.13715
0.436	0.132366	0.15873	0.137887
0.438	0.133721	0.157158	0.137516
0.44	0.133278	0.159851	0.140481
0.442	0.135227	0.158925	0.13744
0.444	0.13155	0.160999	0.137608
0.446	0.131733	0.159355	0.139416
0.448	0.131211	0.160222	0.138031
0.45	0.129895	0.159039	0.136334
0.452	0.131902	0.160149	0.138088
0.454	0.132031	0.156506	0.137703
0.456	0.132493	0.156803	0.137277
0.458	0.133862	0.156789	0.139146
0.46	0.134267	0.157315	0.141358
0.462	0.133198	0.158074	0.139226
0.464	0.131825	0.159307	0.13894
0.466	0.13234	0.158849	0.136242
0.468	0.131253	0.160004	0.136261
0.47	0.131078	0.15934	0.136242
0.472	0.130249	0.159771	0.136368
0.474	0.131955	0.159237	0.139397
0.476	0.131272	0.157098	0.140755
0.478	0.133171	0.157852	0.139706
0.48	0.133015	0.161911	0.140542
0.482	0.130448	0.158643	0.13947
0.484	0.131269	0.160103	0.13934
0.486	0.130944	0.161256	0.137696
0.488	0.130486	0.15973	0.137982
0.49	0.130192	0.159333	0.136613
0.492	0.131673	0.159047	0.137459
0.494	0.130138	0.157921	0.140843
0.496	0.130615	0.159326	0.140435
0.498	0.131752	0.16008	0.139782
0.5	0.131108	0.159333	0.140729
0.502	0.131264	0.159672	0.140615
0.504	0.130112	0.162354	0.139328
0.506	0.130528	0.163784	0.138539
0.508	0.129906	0.162038	0.136849
0.51	0.130337	0.160977	0.139866
0.512	0.130128	0.160683	0.140145
0.514	0.132222	0.158612	0.1404
0.516	0.131397	0.158672	0.140408
0.518	0.132115	0.158738	0.13984
0.52	0.134541	0.159279	0.140961
0.522	0.134785	0.161507	0.14074
0.524	0.132023	0.162216	0.14037
0.526	0.132099	0.163751	0.138634
0.528	0.130913	0.160264	0.13792
0.53	0.131562	0.160222	0.136075
0.532	0.131463	0.160382	0.139134
0.534	0.132973	0.158372	0.138615
0.536	0.132824	0.159104	0.140778
0.538	0.13332	0.159692	0.139828
0.54	0.132283	0.160366	0.139756
0.542	0.132656	0.160573	0.139416
0.544	0.132515	0.16314	0.138577
0.546	0.131264	0.162197	0.136944
0.548	0.130723	0.162213	0.137684
0.55	0.131936	0.162579	0.137745
0.552	0.131215	0.157502	0.137719
0.554	0.133644	0.158802	0.138501
0.556	0.132607	0.158963	0.138593
0.558	0.134026	0.158596	0.138535
0.56	0.13469	0.159889	0.14119
0.562	0.13324	0.160706	0.139157
0.564	0.133069	0.162019	0.136456
0.566	0.131149	0.162674	0.136151
0.568	0.130417	0.161724	0.135396
0.57	0.13186	0.160866	0.136155
0.572	0.134217	0.157158	0.137032
0.574	0.134492	0.155594	0.137653
0.576	0.133275	0.157861	0.137726
0.578	0.134926	0.158265	0.139966
0.58	0.135491	0.159047	0.138867
0.582	0.135189	0.159253	0.137577
0.584	0.134995	0.157914	0.138177
0.586	0.133511	0.158753	0.136247
0.588	0.13176	0.157261	0.136495
0.59	0.133568	0.156075	0.136563
0.592	0.134022	0.155244	0.136651
0.594	0.134629	0.15522	0.136635
0.596	0.134385	0.156685	0.137211
0.598	0.135369	0.155988	0.13744
0.6	0.134366	0.155568	0.136727
0.602	0.134697	0.158467	0.136781
0.604	0.133958	0.158849	0.13667
0.606	0.133759	0.155659	0.135773
0.608	0.132713	0.156884	0.134594
0.61	0.134305	0.154004	0.133355
0.612	0.133672	0.155473	0.132439
0.614	0.135574	0.15397	0.133977
0.616	0.136857	0.153569	0.137253
0.618	0.137058	0.154088	0.136788
0.62	0.136509	0.155454	0.13501
0.622	0.135132	0.155903	0.135007
0.624	0.13543	0.155617	0.13464
0.626	0.134213	0.155416	0.133252
0.628	0.133752	0.154301	0.133629
0.63	0.136051	0.15384	0.13514
0.632	0.135815	0.152695	0.134468
0.634	0.136578	0.154412	0.135647
0.636	0.135872	0.153919	0.13683
0.638	0.137711	0.155423	0.13702
0.64	0.137734	0.153832	0.135865
0.642	0.136937	0.15696	0.135323
0.644	0.135579	0.157719	0.133847
0.646	0.136273	0.156484	0.133313
0.648	0.135961	0.154819	0.133939
0.65	0.136238	0.15506	0.133317
0.652	0.137792	0.153832	0.133713
0.654	0.136395	0.153611	0.13456
0.656	0.137715	0.15574	0.134823
0.658	0.13895	0.153916	0.134983
0.66	0.139347	0.157871	0.133721
0.662	0.135933	0.157295	0.133095
0.664	0.136318	0.156453	0.13229
0.666	0.13514	0.157067	0.13284
0.668	0.137593	0.157559	0.132184
0.67	0.135895	0.155808	0.131447
0.672	0.138043	0.154206	0.133599
0.674	0.136082	0.154519	0.134029
0.676	0.139115	0.15561	0.134606
0.678	0.138043	0.156506	0.133103
0.68	0.137837	0.157784	0.131097
0.682	0.137258	0.160233	0.132504
0.684	0.135914	0.158665	0.1329
0.686	0.134335	0.15698	0.13308
0.688	0.135884	0.156399	0.130672
0.69	0.136521	0.156178	0.132051
0.692	0.136552	0.154877	0.134465
0.694	0.136544	0.155591	0.135174
0.696	0.136464	0.158029	0.135548
0.698	0.138615	0.160172	0.136228
0.7	0.134945	0.158535	0.134438
0.702	0.135163	0.161278	0.13477
0.704	0.135694	0.159642	0.134099
0.706	0.132771	0.159104	0.133004
0.708	0.133424	0.158913	0.132939
0.71	0.13522	0.157441	0.132557
0.712	0.136871	0.157852	0.1353
0.714	0.136724	0.157101	0.135926
0.716	0.137856	0.159874	0.138111
0.718	0.137074	0.160245	0.138673
0.72	0.136094	0.163293	0.135918
0.722	0.135231	0.161904	0.13514
0.724	0.136414	0.160134	0.135427
0.726	0.133351	0.161164	0.135522
0.728	0.136918	0.160847	0.134896
0.73	0.13551	0.157727	0.136819
0.732	0.13667	0.159028	0.137872
0.734	0.138969	0.160649	0.138383
0.736	0.137455	0.159268	0.138623
0.738	0.13606	0.162464	0.137436
0.74	0.136307	0.16396	0.136803
0.742	0.136395	0.16301	0.137459
0.744	0.13501	0.162213	0.136861
0.746	0.135441	0.160366	0.136094
0.748	0.137696	0.161282	0.13625
0.75	0.135403	0.159321	0.135484
0.752	0.136651	0.1605	0.13752
0.754	0.136456	0.160255	0.137253
0.756	0.136696	0.160359	0.13889
0.758	0.136223	0.163132	0.136971
0.76	0.135742	0.164658	0.137258
0.762	0.135059	0.164578	0.136762
0.764	0.134903	0.163918	0.135624
0.766	0.134572	0.162182	0.135552
0.768	0.134816	0.163399	0.136909
0.77	0.134602	0.162327	0.138021
0.772	0.135574	0.161572	0.138203
0.774	0.135812	0.163468	0.137566
0.776	0.136814	0.163243	0.140774
0.778	0.134091	0.164238	0.138364
0.78	0.135605	0.16589	0.135907
0.782	0.132661	0.166215	0.136166
0.784	0.133641	0.165166	0.135739
0.786	0.132802	0.163811	0.137357
0.788	0.13297	0.162373	0.136991
0.79	0.133877	0.161705	0.136299
0.792	0.13358	0.162354	0.138085
0.794	0.135323	0.160267	0.139508
0.796	0.134751	0.163007	0.137532
0.798	0.133367	0.164994	0.139332
0.8	0.132332	0.165372	0.137364
0.802	0.131673	0.164361	0.138955
0.804	0.13229	0.165277	0.136307
0.806	0.132176	0.165929	0.136517
0.808	0.132318	0.163186	0.137554
0.81	0.133381	0.161217	0.13783
0.812	0.132691	0.162816	0.139294
0.814	0.134072	0.161942	0.138718
0.816	0.134449	0.163949	0.138085
0.818	0.133427	0.166317	0.139904
0.82	0.132779	0.165977	0.13847
0.822	0.131394	0.165977	0.137726
0.824	0.130574	0.164826	0.138741
0.826	0.130345	0.164822	0.136514
0.828	0.132169	0.163956	0.137478
0.83	0.132928	0.163468	0.138664
0.832	0.133572	0.162979	0.140443
0.834	0.134079	0.163624	0.139675
0.836	0.133141	0.163239	0.140133
0.838	0.133672	0.164849	0.138768
0.84	0.132439	0.166886	0.138348
0.842	0.133786	0.166821	0.138921
0.844	0.132356	0.165589	0.137604
0.846	0.130844	0.164299	0.137391
0.848	0.132264	0.162976	0.138669
0.85	0.134606	0.162778	0.139897
0.852	0.134671	0.164437	0.139489
0.854	0.135746	0.160985	0.138798
0.856	0.135819	0.164326	0.140717
0.858	0.134633	0.164238	0.138623
0.86	0.133107	0.166516	0.138569
0.862	0.13392	0.166867	0.137681
0.864	0.132821	0.165147	0.139111
0.866	0.133991	0.163983	0.138149
0.868	0.133965	0.162877	0.138291
0.87	0.135983	0.161729	0.139866
0.872	0.135918	0.160122	0.142293
0.874	0.137043	0.163121	0.139611
0.876	0.136693	0.163331	0.140828
0.878	0.134884	0.166215	0.139138
0.88	0.134308	0.165814	0.139359
0.882	0.132684	0.164517	0.138921
0.884	0.133514	0.163803	0.138626
0.886	0.13586	0.164117	0.137337
0.888	0.13435	0.162991	0.138021
0.89	0.137662	0.16171	0.14061
0.892	0.136238	0.160474	0.141587
0.894	0.137452	0.160942	0.140435
0.896	0.138489	0.161606	0.141426
0.898	0.137249	0.161484	0.140557
0.9	0.136616	0.161812	0.136704
0.902	0.134079	0.161831	0.139141
0.904	0.13469	0.159386	0.137757
0.906	0.135655	0.15865	0.138454
0.908	0.137078	0.159138	0.13907
0.91	0.137795	0.157048	0.139512
0.912	0.138222	0.157032	0.141248
0.914	0.140015	0.159764	0.141416
0.916	0.137993	0.15799	0.141606
0.918	0.137901	0.159562	0.141499
0.92	0.13765	0.160866	0.138565
0.922	0.136086	0.159813	0.138035
0.924	0.135579	0.159721	0.136635
0.926	0.137337	0.158405	0.136781
0.928	0.138993	0.157574	0.138936
0.93	0.139405	0.156441	0.139169
0.932	0.139248	0.157902	0.139989
0.934	0.138886	0.158734	0.142269
0.936	0.138836	0.160217	0.139233
0.938	0.138009	0.159043	0.139313
0.94	0.137662	0.159917	0.138673
0.942	0.136372	0.159348	0.138447
0.944	0.13799	0.15952	0.137131
0.946	0.138581	0.157906	0.138966
0.948	0.139557	0.157242	0.138444
0.95	0.139004	0.155487	0.139737
0.952	0.141312	0.154381	0.13958
0.954	0.138531	0.155575	0.138088
0.956	0.139179	0.157692	0.138035
0.958	0.139332	0.15841	0.14183
0.96	0.138241	0.156422	0.137421
0.962	0.136971	0.157059	0.136991
0.964	0.138288	0.156999	0.136895
0.966	0.138817	0.156144	0.137596
0.968	0.138745	0.156617	0.139023
0.97	0.138512	0.154481	0.138123
0.972	0.140481	0.154595	0.138962
0.974	0.139832	0.154015	0.140336
0.976	0.1395	0.157002	0.136982
0.978	0.137913	0.155792	0.138474
0.98	0.138367	0.157559	0.137043
0.982	0.138192	0.157616	0.137227
0.984	0.137982	0.156231	0.13659
0.986	0.138314	0.155998	0.136743
0.988	0.138631	0.15485	0.139573
0.99	0.139771	0.15281	0.139149
0.992	0.13934	0.152928	0.139985
0.994	0.141938	0.154495	0.138905
0.996	0.137703	0.156288	0.138512
0.998	0.137719	0.156487	0.13731
1	0.138657	0.158951	0.137544
History:
User : Chirascan User
Version : Chirascan v.4.4.2.0 Build : Sep 10 2014 12:09:01
DataStore created and initialized for data acquisition.
Time Stamp : Sat Oct 15 22:26:46 2022
----------------------------------------------------
User : Chirascan User
Version : Chirascan v.4.4.2.0 Build : Sep 10 2014 12:09:01
DataStore created and initialized for data acquisition.
Time Stamp : Sat Oct 15 22:27:17 2022
----------------------------------------------------
User : Chirascan User
Version : Chirascan v.4.4.2.0 Build : Sep 10 2014 12:09:01
DataStore created and initialized for data acquisition.
Time Stamp : Sat Oct 15 22:27:17 2022
----------------------------------------------------
User : Chirascan User
Version : Chirascan v.4.4.2.0 Build : Sep 10 2014 12:09:01
DataStore created and initialized for data acquisition.
Time Stamp : Sat Oct 15 22:27:17 2022
----------------------------------------------------
User : Chirascan User
Version : Chirascan v.4.4.2.0 Build : Sep 10 2014 12:09:01
DataStore created and initialized for data acquisition.
Time Stamp : Sat Oct 15 19:51:55 2022
----------------------------------------------------
User : Chirascan User
Version : Chirascan v.4.4.2.0 Build : Sep 10 2014 12:09:01
DataStore created and initialized for data acquisition.
Time Stamp : Sat Oct 15 19:52:35 2022
----------------------------------------------------
User : Chirascan User
Version : Chirascan v.4.4.2.0 Build : Sep 10 2014 12:09:01
DataStore created and initialized for data acquisition.
Time Stamp : Sat Oct 15 19:52:35 2022
----------------------------------------------------
User : Chirascan User
Version : Chirascan v.4.4.2.0 Build : Sep 10 2014 12:09:01
DataStore created and initialized for data acquisition.
Time Stamp : Sat Oct 15 19:52:35 2022
----------------------------------------------------
User : Chirascan User
Version : Chirascan v.4.4.2.0 Build : Sep 10 2014 12:09:01
Traces Removed :
num 7 one of one.dsx::1
num 7 one of one.dsx::2
num 7 one of one.dsx::3
num 7 one of one.dsx::4
Time Stamp : Sat Oct 15 23:27:09 2022
----------------------------------------------------
User : Chirascan User
Version : Chirascan v.4.4.2.0 Build : Sep 10 2014 12:09:01
DataStore created and initialized for data acquisition.
Time Stamp : Sat Oct 15 23:27:14 2022
----------------------------------------------------
User : Chirascan User
Version : Chirascan v.4.4.2.0 Build : Sep 10 2014 12:09:01
DataStore created and initialized for data acquisition.
Time Stamp : Sat Oct 15 23:27:14 2022
----------------------------------------------------
User : Chirascan User
Version : Chirascan v.4.4.2.0 Build : Sep 10 2014 12:09:01
DataStore created and initialized for data acquisition.
Time Stamp : Sat Oct 15 23:27:14 2022
----------------------------------------------------
User : Chirascan User
Version : Chirascan v.4.4.2.0 Build : Sep 10 2014 12:09:01
F:\Pragya\15 oct 2022\num 7 one of one.dsx
Attributes :
- Time Stamp :Sat Oct 15 23:27:14 2022
- File ID : {6B6A3824-F6F5-4f0c-B998-6500F4AA9D0A}
- Is CFR Compliant : false
- Data has been modified:
- Parent File Name : F:\Pragya\15 oct 2022\num 7.dsx
- Parent File ID : {45E679BC-4962-4367-8BDE-5891905CAE6D}
Time Stamp : Sat Oct 15 23:29:15 2022
----------------------------------------------------
User : Chirascan User
Version : Chirascan v.4.4.2.0 Build : Sep 10 2014 12:09:01
DataStore created and initialized for data acquisition.
Time Stamp : Sat Oct 15 22:59:51 2022
----------------------------------------------------
User : Chirascan User
Version : Chirascan v.4.4.2.0 Build : Sep 10 2014 12:09:01
DataStore created and initialized for data acquisition.
Time Stamp : Sat Oct 15 22:59:59 2022
----------------------------------------------------
User : Chirascan User
Version : Chirascan v.4.4.2.0 Build : Sep 10 2014 12:09:01
DataStore created and initialized for data acquisition.
Time Stamp : Sat Oct 15 22:59:59 2022
----------------------------------------------------
User : Chirascan User
Version : Chirascan v.4.4.2.0 Build : Sep 10 2014 12:09:01
DataStore created and initialized for data acquisition.
Time Stamp : Sat Oct 15 22:59:59 2022
----------------------------------------------------
User : Chirascan User
Version : Chirascan v.4.4.2.0 Build : Sep 10 2014 12:09:01
F:\Pragya\15 oct 2022\num 30.dsx
Attributes :
- Time Stamp :Sat Oct 15 22:59:59 2022
- File ID : {99348EF3-539D-4bc7-831D-DA98145B6FF2}
- Is CFR Compliant : false
#NAME?
Time Stamp : Sat Oct 15 23:29:26 2022
----------------------------------------------------
User : Chirascan User
Version : Chirascan v.4.4.2.0 Build : Sep 10 2014 12:09:01
DataStore created and initialized for data acquisition.
Time Stamp : Sat Oct 15 23:29:39 2022
----------------------------------------------------
User : Chirascan User
Version : Chirascan v.4.4.2.0 Build : Sep 10 2014 12:09:01
DataStore created and initialized for data acquisition.
Time Stamp : Sat Oct 15 23:29:39 2022
----------------------------------------------------
User : Chirascan User
Version : Chirascan v.4.4.2.0 Build : Sep 10 2014 12:09:01
DataStore created and initialized for data acquisition.
Time Stamp : Sat Oct 15 23:29:39 2022
----------------------------------------------------

## Sheet: Sheet1
Time(s)	20.83uM:166.67uM::DMPG:dmpc	20.83uM:166.67uM::Cardiolipin:dmpc	20.83uM:166.67uM::POPS:dmpc
0.002	0.127625	0.132122	0.131482
0.004	0.130131	0.134633	0.132366
0.006	0.129387	0.139756	0.133934
0.008	0.128071	0.142151	0.13271
0.01	0.128884	0.144078	0.131798
0.012	0.128632	0.145043	0.131069
0.014	0.129895	0.145123	0.131574
0.016	0.129502	0.145268	0.130913
0.018	0.126946	0.144227	0.131336
0.02	0.127563	0.144272	0.132432
0.022	0.130154	0.145326	0.1349
0.024	0.130119	0.147386	0.135427
0.026	0.131489	0.146626	0.133851
0.028	0.131714	0.148129	0.1335
0.03	0.13007	0.148754	0.134305
0.032	0.129021	0.150772	0.130749
0.034	0.128274	0.150433	0.131791
0.036	0.128227	0.149697	0.130684
0.038	0.129048	0.150174	0.132904
0.04	0.128911	0.150235	0.133507
0.042	0.129399	0.149037	0.134721
0.044	0.131997	0.149853	0.136296
0.046	0.131836	0.150495	0.134495
0.048	0.132279	0.15101	0.13501
0.05	0.131356	0.153732	0.13496
0.052	0.129452	0.154072	0.132332
0.054	0.128952	0.153599	0.131222
0.056	0.128819	0.153404	0.131997
0.058	0.129212	0.152974	0.132874
0.06	0.128574	0.151989	0.133568
0.062	0.131168	0.151757	0.136292
0.064	0.13268	0.152352	0.136639
0.066	0.130634	0.153961	0.134228
0.068	0.1298	0.153931	0.134763
0.07	0.13057	0.155213	0.133129
0.072	0.128808	0.154183	0.131874
0.074	0.129219	0.156475	0.132207
0.076	0.126119	0.154176	0.131867
0.078	0.127343	0.153813	0.134083
0.08	0.129483	0.154316	0.132881
0.082	0.129098	0.151681	0.134941
0.084	0.130715	0.152149	0.13504
0.086	0.131222	0.152848	0.134735
0.088	0.132217	0.155426	0.134457
0.09	0.130239	0.155674	0.133786
0.092	0.129899	0.155568	0.133519
0.094	0.129021	0.155149	0.133138
0.096	0.127579	0.155598	0.133313
0.098	0.129944	0.152787	0.133271
0.1	0.129746	0.153633	0.133797
0.102	0.130558	0.153645	0.13485
0.104	0.130936	0.153061	0.135605
0.106	0.129803	0.155022	0.135155
0.108	0.130764	0.155827	0.135269
0.11	0.129117	0.155296	0.13371
0.112	0.129476	0.15696	0.132332
0.114	0.128624	0.15429	0.131612
0.116	0.131474	0.15561	0.13168
0.118	0.129185	0.154351	0.134915
0.12	0.13028	0.15337	0.13329
0.122	0.130787	0.155171	0.134778
0.124	0.130882	0.153309	0.136395
0.126	0.131367	0.153413	0.1349
0.128	0.131943	0.155079	0.135621
0.13	0.130405	0.156239	0.132718
0.132	0.129555	0.155499	0.133656
0.134	0.129375	0.156609	0.130872
0.136	0.12798	0.15638	0.132833
0.138	0.128453	0.153966	0.133762
0.14	0.130787	0.153675	0.133114
0.142	0.129795	0.153115	0.136662
0.144	0.130497	0.154915	0.134579
0.146	0.13083	0.153633	0.133076
0.148	0.130554	0.15485	0.13324
0.15	0.12912	0.157464	0.133901
0.152	0.127988	0.157238	0.13173
0.154	0.128068	0.156059	0.132217
0.156	0.128846	0.154533	0.131669
0.158	0.128831	0.152127	0.132813
0.16	0.130452	0.153565	0.13303
0.162	0.13131	0.154393	0.134197
0.164	0.131726	0.152787	0.13469
0.166	0.130059	0.154164	0.134991
0.168	0.13086	0.156666	0.133488
0.17	0.129139	0.156643	0.13464
0.172	0.126873	0.155296	0.132866
0.174	0.127461	0.154424	0.133278
0.176	0.128083	0.153618	0.13371
0.178	0.129399	0.152981	0.132824
0.18	0.128765	0.153413	0.134823
0.182	0.130811	0.155029	0.135907
0.184	0.130528	0.154812	0.135583
0.186	0.129689	0.154686	0.135274
0.188	0.128239	0.156544	0.135765
0.19	0.127366	0.155991	0.135689
0.192	0.126816	0.156662	0.133317
0.194	0.128567	0.155385	0.132775
0.196	0.12722	0.155163	0.132436
0.198	0.128952	0.153809	0.13443
0.2	0.129654	0.152574	0.135071
0.202	0.130417	0.152882	0.138302
0.204	0.130825	0.154552	0.136292
0.206	0.128418	0.156437	0.136433
0.208	0.129552	0.15728	0.134373
0.21	0.129387	0.155636	0.134286
0.212	0.129132	0.15527	0.134057
0.214	0.127808	0.155782	0.134388
0.216	0.127362	0.153527	0.135144
0.218	0.128975	0.153847	0.13577
0.22	0.129677	0.155067	0.135617
0.222	0.129528	0.15287	0.13646
0.224	0.129933	0.154266	0.135773
0.226	0.129098	0.15698	0.136868
0.228	0.128193	0.156758	0.135815
0.23	0.128217	0.157956	0.134621
0.232	0.126313	0.15604	0.133367
0.234	0.12714	0.154934	0.134553
0.236	0.127751	0.154309	0.13514
0.238	0.128407	0.15408	0.135217
0.24	0.129216	0.152817	0.137764
0.242	0.129261	0.153337	0.136365
0.244	0.131527	0.154576	0.13483
0.246	0.12954	0.155869	0.134087
0.248	0.129006	0.155721	0.133996
0.25	0.128014	0.156243	0.134465
0.252	0.128212	0.155957	0.134572
0.254	0.128812	0.154138	0.132703
0.256	0.128491	0.151646	0.133615
0.258	0.128899	0.153687	0.134366
0.26	0.12864	0.153878	0.136311
0.262	0.130761	0.154812	0.13525
0.264	0.129944	0.157887	0.137386
0.266	0.1311	0.156533	0.136757
0.268	0.128098	0.158353	0.135376
0.27	0.13015	0.156689	0.134743
0.272	0.129269	0.156159	0.133367
0.274	0.128403	0.155797	0.134099
0.276	0.128498	0.155976	0.132999
0.278	0.130215	0.154552	0.133858
0.28	0.131302	0.154889	0.136471
0.282	0.132	0.157242	0.135182
0.284	0.132179	0.155976	0.135262
0.286	0.130658	0.158429	0.136677
0.288	0.129403	0.158124	0.136238
0.29	0.128503	0.158051	0.132871
0.292	0.12904	0.158162	0.132871
0.294	0.129498	0.156617	0.134454
0.296	0.129433	0.156274	0.13604
0.298	0.131688	0.153245	0.13392
0.3	0.132165	0.155149	0.135541
0.302	0.132138	0.157056	0.135285
0.304	0.132337	0.159383	0.134556
0.306	0.132885	0.158405	0.133648
0.308	0.132408	0.160141	0.133015
0.31	0.130681	0.160786	0.132833
0.312	0.130539	0.159062	0.132973
0.314	0.130665	0.157803	0.133259
0.316	0.131912	0.156151	0.133343
0.318	0.133084	0.155957	0.136346
0.32	0.134778	0.156879	0.136921
0.322	0.133587	0.15789	0.135617
0.324	0.13358	0.159539	0.136269
0.326	0.133656	0.162492	0.135663
0.328	0.132241	0.160881	0.133786
0.33	0.130825	0.161625	0.134263
0.332	0.130424	0.159127	0.134048
0.334	0.132394	0.158646	0.137074
0.336	0.13255	0.157762	0.135899
0.338	0.135678	0.157654	0.136013
0.34	0.133828	0.15862	0.137497
0.342	0.134858	0.157849	0.136143
0.344	0.13495	0.160336	0.136323
0.346	0.134118	0.160137	0.13715
0.348	0.13097	0.159794	0.135632
0.35	0.13337	0.159771	0.134892
0.352	0.133008	0.158528	0.135247
0.354	0.131409	0.156732	0.134766
0.356	0.134095	0.155118	0.13675
0.358	0.133256	0.156865	0.137017
0.36	0.136437	0.156999	0.137753
0.362	0.134373	0.158211	0.136852
0.364	0.133759	0.16153	0.13868
0.366	0.133538	0.157895	0.135354
0.368	0.132904	0.161164	0.134999
0.37	0.131493	0.158792	0.134724
0.372	0.134423	0.159733	0.135179
0.374	0.133305	0.157471	0.135708
0.376	0.134072	0.157155	0.135571
0.378	0.134636	0.156922	0.13905
0.38	0.135098	0.157013	0.138199
0.382	0.135564	0.159405	0.138326
0.384	0.135758	0.160317	0.137837
0.386	0.132176	0.16008	0.138574
0.388	0.131803	0.160366	0.136231
0.39	0.131829	0.161495	0.135278
0.392	0.132115	0.15992	0.135373
0.394	0.132	0.157723	0.137696
0.396	0.133377	0.15717	0.1377
0.398	0.135545	0.158936	0.138081
0.4	0.135281	0.159355	0.139893
0.402	0.134095	0.160832	0.139923
0.404	0.135059	0.160378	0.137105
0.406	0.133511	0.161999	0.139214
0.408	0.13207	0.161915	0.136197
0.41	0.132672	0.161297	0.13607
0.412	0.132191	0.160191	0.137081
0.414	0.132599	0.158677	0.138848
0.416	0.134225	0.157399	0.137013
0.418	0.135098	0.157647	0.139862
0.42	0.133771	0.159721	0.138116
0.422	0.134125	0.158081	0.139474
0.424	0.132675	0.162835	0.13873
0.426	0.1329	0.161504	0.137582
0.428	0.132604	0.161939	0.136623
0.43	0.131451	0.161492	0.135758
0.432	0.132489	0.160214	0.135933
0.434	0.133343	0.157814	0.13715
0.436	0.132366	0.15873	0.137887
0.438	0.133721	0.157158	0.137516
0.44	0.133278	0.159851	0.140481
0.442	0.135227	0.158925	0.13744
0.444	0.13155	0.160999	0.137608
0.446	0.131733	0.159355	0.139416
0.448	0.131211	0.160222	0.138031
0.45	0.129895	0.159039	0.136334
0.452	0.131902	0.160149	0.138088
0.454	0.132031	0.156506	0.137703
0.456	0.132493	0.156803	0.137277
0.458	0.133862	0.156789	0.139146
0.46	0.134267	0.157315	0.141358
0.462	0.133198	0.158074	0.139226
0.464	0.131825	0.159307	0.13894
0.466	0.13234	0.158849	0.136242
0.468	0.131253	0.160004	0.136261
0.47	0.131078	0.15934	0.136242
0.472	0.130249	0.159771	0.136368
0.474	0.131955	0.159237	0.139397
0.476	0.131272	0.157098	0.140755
0.478	0.133171	0.157852	0.139706
0.48	0.133015	0.161911	0.140542
0.482	0.130448	0.158643	0.13947
0.484	0.131269	0.160103	0.13934
0.486	0.130944	0.161256	0.137696
0.488	0.130486	0.15973	0.137982
0.49	0.130192	0.159333	0.136613
0.492	0.131673	0.159047	0.137459
0.494	0.130138	0.157921	0.140843
0.496	0.130615	0.159326	0.140435
0.498	0.131752	0.16008	0.139782
0.5	0.131108	0.159333	0.140729
0.502	0.131264	0.159672	0.140615
0.504	0.130112	0.162354	0.139328
0.506	0.130528	0.163784	0.138539
0.508	0.129906	0.162038	0.136849
0.51	0.130337	0.160977	0.139866
0.512	0.130128	0.160683	0.140145
0.514	0.132222	0.158612	0.1404
0.516	0.131397	0.158672	0.140408
0.518	0.132115	0.158738	0.13984
0.52	0.134541	0.159279	0.140961
0.522	0.134785	0.161507	0.14074
0.524	0.132023	0.162216	0.14037
0.526	0.132099	0.163751	0.138634
0.528	0.130913	0.160264	0.13792
0.53	0.131562	0.160222	0.136075
0.532	0.131463	0.160382	0.139134
0.534	0.132973	0.158372	0.138615
0.536	0.132824	0.159104	0.140778
0.538	0.13332	0.159692	0.139828
0.54	0.132283	0.160366	0.139756
0.542	0.132656	0.160573	0.139416
0.544	0.132515	0.16314	0.138577
0.546	0.131264	0.162197	0.136944
0.548	0.130723	0.162213	0.137684
0.55	0.131936	0.162579	0.137745
0.552	0.131215	0.157502	0.137719
0.554	0.133644	0.158802	0.138501
0.556	0.132607	0.158963	0.138593
0.558	0.134026	0.158596	0.138535
0.56	0.13469	0.159889	0.14119
0.562	0.13324	0.160706	0.139157
0.564	0.133069	0.162019	0.136456
0.566	0.131149	0.162674	0.136151
0.568	0.130417	0.161724	0.135396
0.57	0.13186	0.160866	0.136155
0.572	0.134217	0.157158	0.137032
0.574	0.134492	0.155594	0.137653
0.576	0.133275	0.157861	0.137726
0.578	0.134926	0.158265	0.139966
0.58	0.135491	0.159047	0.138867
0.582	0.135189	0.159253	0.137577
0.584	0.134995	0.157914	0.138177
0.586	0.133511	0.158753	0.136247
0.588	0.13176	0.157261	0.136495
0.59	0.133568	0.156075	0.136563
0.592	0.134022	0.155244	0.136651
0.594	0.134629	0.15522	0.136635
0.596	0.134385	0.156685	0.137211
0.598	0.135369	0.155988	0.13744
0.6	0.134366	0.155568	0.136727
0.602	0.134697	0.158467	0.136781
0.604	0.133958	0.158849	0.13667
0.606	0.133759	0.155659	0.135773
0.608	0.132713	0.156884	0.134594
0.61	0.134305	0.154004	0.133355
0.612	0.133672	0.155473	0.132439
0.614	0.135574	0.15397	0.133977
0.616	0.136857	0.153569	0.137253
0.618	0.137058	0.154088	0.136788
0.62	0.136509	0.155454	0.13501
0.622	0.135132	0.155903	0.135007
0.624	0.13543	0.155617	0.13464
0.626	0.134213	0.155416	0.133252
0.628	0.133752	0.154301	0.133629
0.63	0.136051	0.15384	0.13514
0.632	0.135815	0.152695	0.134468
0.634	0.136578	0.154412	0.135647
0.636	0.135872	0.153919	0.13683
0.638	0.137711	0.155423	0.13702
0.64	0.137734	0.153832	0.135865
0.642	0.136937	0.15696	0.135323
0.644	0.135579	0.157719	0.133847
0.646	0.136273	0.156484	0.133313
0.648	0.135961	0.154819	0.133939
0.65	0.136238	0.15506	0.133317
0.652	0.137792	0.153832	0.133713
0.654	0.136395	0.153611	0.13456
0.656	0.137715	0.15574	0.134823
0.658	0.13895	0.153916	0.134983
0.66	0.139347	0.157871	0.133721
0.662	0.135933	0.157295	0.133095
0.664	0.136318	0.156453	0.13229
0.666	0.13514	0.157067	0.13284
0.668	0.137593	0.157559	0.132184
0.67	0.135895	0.155808	0.131447
0.672	0.138043	0.154206	0.133599
0.674	0.136082	0.154519	0.134029
0.676	0.139115	0.15561	0.134606
0.678	0.138043	0.156506	0.133103
0.68	0.137837	0.157784	0.131097
0.682	0.137258	0.160233	0.132504
0.684	0.135914	0.158665	0.1329
0.686	0.134335	0.15698	0.13308
0.688	0.135884	0.156399	0.130672
0.69	0.136521	0.156178	0.132051
0.692	0.136552	0.154877	0.134465
0.694	0.136544	0.155591	0.135174
0.696	0.136464	0.158029	0.135548
0.698	0.138615	0.160172	0.136228
0.7	0.134945	0.158535	0.134438
0.702	0.135163	0.161278	0.13477
0.704	0.135694	0.159642	0.134099
0.706	0.132771	0.159104	0.133004
0.708	0.133424	0.158913	0.132939
0.71	0.13522	0.157441	0.132557
0.712	0.136871	0.157852	0.1353
0.714	0.136724	0.157101	0.135926
0.716	0.137856	0.159874	0.138111
0.718	0.137074	0.160245	0.138673
0.72	0.136094	0.163293	0.135918
0.722	0.135231	0.161904	0.13514
0.724	0.136414	0.160134	0.135427
0.726	0.133351	0.161164	0.135522
0.728	0.136918	0.160847	0.134896
0.73	0.13551	0.157727	0.136819
0.732	0.13667	0.159028	0.137872
0.734	0.138969	0.160649	0.138383
0.736	0.137455	0.159268	0.138623
0.738	0.13606	0.162464	0.137436
0.74	0.136307	0.16396	0.136803
0.742	0.136395	0.16301	0.137459
0.744	0.13501	0.162213	0.136861
0.746	0.135441	0.160366	0.136094
0.748	0.137696	0.161282	0.13625
0.75	0.135403	0.159321	0.135484
0.752	0.136651	0.1605	0.13752
0.754	0.136456	0.160255	0.137253
0.756	0.136696	0.160359	0.13889
0.758	0.136223	0.163132	0.136971
0.76	0.135742	0.164658	0.137258
0.762	0.135059	0.164578	0.136762
0.764	0.134903	0.163918	0.135624
0.766	0.134572	0.162182	0.135552
0.768	0.134816	0.163399	0.136909
0.77	0.134602	0.162327	0.138021
0.772	0.135574	0.161572	0.138203
0.774	0.135812	0.163468	0.137566
0.776	0.136814	0.163243	0.140774
0.778	0.134091	0.164238	0.138364
0.78	0.135605	0.16589	0.135907
0.782	0.132661	0.166215	0.136166
0.784	0.133641	0.165166	0.135739
0.786	0.132802	0.163811	0.137357
0.788	0.13297	0.162373	0.136991
0.79	0.133877	0.161705	0.136299
0.792	0.13358	0.162354	0.138085
0.794	0.135323	0.160267	0.139508
0.796	0.134751	0.163007	0.137532
0.798	0.133367	0.164994	0.139332
0.8	0.132332	0.165372	0.137364
0.802	0.131673	0.164361	0.138955
0.804	0.13229	0.165277	0.136307
0.806	0.132176	0.165929	0.136517
0.808	0.132318	0.163186	0.137554
0.81	0.133381	0.161217	0.13783
0.812	0.132691	0.162816	0.139294
0.814	0.134072	0.161942	0.138718
0.816	0.134449	0.163949	0.138085
0.818	0.133427	0.166317	0.139904
0.82	0.132779	0.165977	0.13847
0.822	0.131394	0.165977	0.137726
0.824	0.130574	0.164826	0.138741
0.826	0.130345	0.164822	0.136514
0.828	0.132169	0.163956	0.137478
0.83	0.132928	0.163468	0.138664
0.832	0.133572	0.162979	0.140443
0.834	0.134079	0.163624	0.139675
0.836	0.133141	0.163239	0.140133
0.838	0.133672	0.164849	0.138768
0.84	0.132439	0.166886	0.138348
0.842	0.133786	0.166821	0.138921
0.844	0.132356	0.165589	0.137604
0.846	0.130844	0.164299	0.137391
0.848	0.132264	0.162976	0.138669
0.85	0.134606	0.162778	0.139897
0.852	0.134671	0.164437	0.139489
0.854	0.135746	0.160985	0.138798
0.856	0.135819	0.164326	0.140717
0.858	0.134633	0.164238	0.138623
0.86	0.133107	0.166516	0.138569
0.862	0.13392	0.166867	0.137681
0.864	0.132821	0.165147	0.139111
0.866	0.133991	0.163983	0.138149
0.868	0.133965	0.162877	0.138291
0.87	0.135983	0.161729	0.139866
0.872	0.135918	0.160122	0.142293
0.874	0.137043	0.163121	0.139611
0.876	0.136693	0.163331	0.140828
0.878	0.134884	0.166215	0.139138
0.88	0.134308	0.165814	0.139359
0.882	0.132684	0.164517	0.138921
0.884	0.133514	0.163803	0.138626
0.886	0.13586	0.164117	0.137337
0.888	0.13435	0.162991	0.138021
0.89	0.137662	0.16171	0.14061
0.892	0.136238	0.160474	0.141587
0.894	0.137452	0.160942	0.140435
0.896	0.138489	0.161606	0.141426
0.898	0.137249	0.161484	0.140557
0.9	0.136616	0.161812	0.136704
0.902	0.134079	0.161831	0.139141
0.904	0.13469	0.159386	0.137757
0.906	0.135655	0.15865	0.138454
0.908	0.137078	0.159138	0.13907
0.91	0.137795	0.157048	0.139512
0.912	0.138222	0.157032	0.141248
0.914	0.140015	0.159764	0.141416
0.916	0.137993	0.15799	0.141606
0.918	0.137901	0.159562	0.141499
0.92	0.13765	0.160866	0.138565
0.922	0.136086	0.159813	0.138035
0.924	0.135579	0.159721	0.136635
0.926	0.137337	0.158405	0.136781
0.928	0.138993	0.157574	0.138936
0.93	0.139405	0.156441	0.139169
0.932	0.139248	0.157902	0.139989
0.934	0.138886	0.158734	0.142269
0.936	0.138836	0.160217	0.139233
0.938	0.138009	0.159043	0.139313
0.94	0.137662	0.159917	0.138673
0.942	0.136372	0.159348	0.138447
0.944	0.13799	0.15952	0.137131
0.946	0.138581	0.157906	0.138966
0.948	0.139557	0.157242	0.138444
0.95	0.139004	0.155487	0.139737
0.952	0.141312	0.154381	0.13958
0.954	0.138531	0.155575	0.138088
0.956	0.139179	0.157692	0.138035
0.958	0.139332	0.15841	0.14183
0.96	0.138241	0.156422	0.137421
0.962	0.136971	0.157059	0.136991
0.964	0.138288	0.156999	0.136895
0.966	0.138817	0.156144	0.137596
0.968	0.138745	0.156617	0.139023
0.97	0.138512	0.154481	0.138123
0.972	0.140481	0.154595	0.138962
0.974	0.139832	0.154015	0.140336
0.976	0.1395	0.157002	0.136982
0.978	0.137913	0.155792	0.138474
0.98	0.138367	0.157559	0.137043
0.982	0.138192	0.157616	0.137227
0.984	0.137982	0.156231	0.13659
0.986	0.138314	0.155998	0.136743
0.988	0.138631	0.15485	0.139573
0.99	0.139771	0.15281	0.139149
0.992	0.13934	0.152928	0.139985
0.994	0.141938	0.154495	0.138905
0.996	0.137703	0.156288	0.138512
0.998	0.137719	0.156487	0.13731
1	0.138657	0.158951	0.137544
