# Supplementary material for: Daptomycin forms a stable complex with phosphatidylglycerol for selective uptake to bacterial membrane
Source: eLife. 2025 Jun 2;13:RP93267. doi: 10.7554/eLife.93267 (PMC12129450; doi:10.7554/eLife.93267)
Supplement: Figure 3—figure supplement 1—source data 1. [file elife-93267-fig3-figsupp1-data1.xlsx]

## Sheet: Multi Scans KIN
Multi Scans KIN
Labels	CONTROL KIN	7 KIN	6 KIN	5 KIN	4 KIN	3 KIN	2 KIN	1 KIN
Type	Kinetic Scan	Kinetic Scan	Kinetic Scan	Kinetic Scan	Kinetic Scan	Kinetic Scan	Kinetic Scan	Kinetic Scan
Comment
Start	0	0	0	0	0	0	0	0
Stop	600000000000	600000000000	600000000000	600000000000	600000000000	600000000000	600000000000	600000000000
Step	1000000000	1000000000	1000000000	1000000000	1000000000	1000000000	1000000000	1000000000
Fixed/Offset
XAxis	Time(ns)	Time(ns)	Time(ns)	Time(ns)	Time(ns)	Time(ns)	Time(ns)	Time(ns)
YAxis	Counts	Counts	Counts	Counts	Counts	Counts	Counts	Counts
0	18167	39163.5	33198.8	36517.1	34244.2	29888	28966.9	29656.6
1000000000	18155.9	39507.5	33574.1	36780.2	34390.4	30055.4	29118.9	29885.6
2000000000	18127.8	39945.1	33751.9	37138.1	34755.4	30126.1	29021.9	29791.6
3000000000	17981.9	40400.4	34059.3	37270.3	34904.8	30330.9	29137.4	29969.4
4000000000	18047	40787	34323.1	37425.2	35233.3	30580.3	29184.5	29971
5000000000	18040	41290.8	34504.3	37807.8	35223.1	30653.3	29480.8	29976.6
6000000000	17957.9	41748.9	34789.8	38093.6	35509.4	30715.8	29480.3	30089.6
7000000000	18069.6	42308.8	35074.4	38268.7	35841.9	30953.6	29505.4	30342.3
8000000000	18021.9	42729.5	35348.7	38593.8	35945.3	31082.2	29614.7	30180
9000000000	18078.3	43334.6	35539.9	38775.8	36282.8	31274.3	29669.3	30376.7
10000000000	18042.3	43574.8	35805.2	39081.2	36429	31427.9	29732.5	30437.4
11000000000	18173.6	44329.5	36129.7	39287.6	36618.1	31493.3	29856.1	30418.5
12000000000	18024.2	44733.8	36333	39653.1	36871.7	31742	29817.4	30540.2
13000000000	18111.9	45354	36514.8	39847.9	37167.2	31891.6	29992	30523.5
14000000000	18050.5	45900.4	36892.7	40204.1	37367.4	32102.9	30101.3	30623.1
15000000000	18063.4	46515.4	37120.1	40404.3	37522.3	32220.6	29998.3	30762.9
16000000000	18067.9	47092.9	37514.9	40818	37662.2	32392.5	30081	30643.6
17000000000	18038.7	47535.5	37873.8	40993.3	37908.7	32571.5	30311.6	30756.8
18000000000	18038.8	48196.6	38171.3	41411.3	38197	32648.1	30298.3	30966.3
19000000000	18033.8	48698.4	38373.3	41704.6	38587.6	32861.5	30448.2	30869.1
20000000000	18141.3	49238.1	38659	41818.2	38709.3	33074.1	30418.7	31003.8
21000000000	18038	49769.8	38997.2	42286.6	39014.6	33156	30537.2	30878.2
22000000000	18056	50398.3	39498.8	42399.8	39171.3	33371.1	30557.5	31012.7
23000000000	18100.6	50793.6	39646.3	42988.8	39450.8	33625.8	30607.9	31120.1
24000000000	18081.8	51596.2	40058.5	43263	39852.1	33661.1	30722.1	31288.5
25000000000	18040.8	52148.4	40412	43553.8	40107.7	33933.3	30755.3	31192.1
26000000000	18031	52842.9	40687.2	44073.8	40266.1	34123.3	30886.8	31284.1
27000000000	18061.6	53268.6	41214.3	44165.9	40624	34177.9	31042.6	31254.2
28000000000	18124.3	53932.3	41532.5	44524	40781.7	34299	31023.8	31385.2
29000000000	18022.8	54536.5	41873.6	45006.4	41131.3	34373.4	31123.9	31537.2
30000000000	18034.8	55188.3	42151	45254.7	41407.4	34740.3	31146.2	31491.9
31000000000	18044.3	55846.6	42444.9	45679.9	41768.5	34770.1	31263.5	31454.9
32000000000	18108	56328.2	42806.6	45986.2	41945.7	35036.2	31381.3	31600.4
33000000000	18046.6	56913.5	43247.8	46318.8	42211.8	35392.6	31396.9	31669.2
34000000000	18093.1	57540.1	43703	46733.2	42612.1	35531.7	31557.6	31561.5
35000000000	17991	58120.6	44023.4	47152.8	42809.5	35637.6	31523.3	31800.8
36000000000	18027.2	58707.2	44432.8	47480.7	43259.5	35708.1	31548.4	31872
37000000000	18063.3	59386.5	44870.9	47956.9	43404.8	35927.5	31613.2	31715.8
38000000000	18038	60024	45198.9	48375.1	43776.5	36309.4	31702	31961.3
39000000000	17958.7	60486.1	45684.8	48737.4	44149.8	36444.2	31828	31959.5
40000000000	18026.7	61091.4	45985.3	49143.2	44475.5	36550.5	31806.4	32135.2
41000000000	18028.2	61797.4	46313.8	49462.3	44802.2	36817.2	31945.9	32123.6
42000000000	18057.5	62168.5	46848.7	49952.2	45113.1	36969.3	31929.5	32119.7
43000000000	18011.1	62771.1	47170.9	50220.7	45333.7	37295.2	32092.1	32344.7
44000000000	18046.7	63309.6	47599.1	50708.4	45720.7	37346.1	31961.1	32238.9
45000000000	18067.1	63815.8	48133.4	51033.4	46007.9	37528.6	32284.7	32334.9
46000000000	18037.5	64538.3	48385.9	51301.3	46211.6	37878.9	32174.7	32436.8
47000000000	18083.2	64958	48868.4	51786.8	46763.1	38059.3	32312	32380.5
48000000000	17985	65549.8	49721.8	52198.6	46923.3	38318.2	32386.9	32420.3
49000000000	18092	66107.7	50119.7	52708.9	47521.2	38441.8	32452.7	32432.2
50000000000	18093.8	66645.4	50621.4	53000.6	47696.1	38631.4	32487.9	32473.6
51000000000	17939.6	67146.3	51051.7	53498.9	47987.6	39078.4	32524.6	32601.2
52000000000	18054.7	67760.1	51544.2	53969.8	48301.9	39198.2	32523.2	32614
53000000000	17968.6	68336.4	51974.8	54273.7	48796.6	39400.2	32644.9	32729.1
54000000000	18070.1	68799.8	52342.5	54792	49025.4	39665.8	32714.3	32747.2
55000000000	18011.9	69414.2	52874.2	55213.5	49249.7	40014.8	32906.7	32774.9
56000000000	18075.9	69823	53245.4	55574	49781.8	40220.6	32869.9	32992.6
57000000000	18010.5	70220.9	53741.6	55928.9	50111.3	40455.9	32954.3	32888.6
58000000000	18057.5	70798.9	54001.7	56366.9	50484.1	40637.9	33061.9	33015.4
59000000000	17984.3	71306.8	54688.6	56934.4	50813.5	40915.8	33243.7	33116.8
60000000000	17900.5	71942	54889.7	57243.3	51205.9	41058.4	33319.6	33077.9
61000000000	17985.4	72291.7	55410.1	57621.4	51464	41358.6	33195.9	33102.6
62000000000	17993.4	72734.6	55932.6	58120.6	51761.5	41707.8	33373.6	33138.6
63000000000	18002.9	73539.1	56289.7	58473.7	52278.8	41874.1	33533.1	33239.6
64000000000	18011.1	73843.1	56580.9	58822.9	52394	42172.6	33469.8	33247.7
65000000000	18047.2	74287.9	57066.6	59441.6	52989.7	42546.6	33556.1	33432.1
66000000000	17976.1	74822.5	57671	59859.1	53366.5	42682.3	33578.2	33476.1
67000000000	18008.9	75225.7	57978.5	60129.4	53808.2	42958.5	33519.1	33459.6
68000000000	18023	75660.5	58517.4	60564.8	53986.6	43241.5	33599.4	33398
69000000000	17979.4	76295.7	58759.8	61091.3	54255.8	43477	33725.4	33528.5
70000000000	17917.4	76644.6	59306.1	61359.1	54784.4	43754.6	33903.5	33512.9
71000000000	17969.8	77216.1	59590.1	61857.9	55142.8	44119.7	33967.4	33663.7
72000000000	17995.6	77623.6	60076.7	62346.3	55477.7	44350.3	33927.2	33753.3
73000000000	17973.2	77914.6	60659.5	62781.4	55969.5	44560	33932.6	33802.9
74000000000	18007.8	78625.4	60843.2	63138.9	56167.3	44860	34183.5	33905.1
75000000000	17904	78899.8	61295.3	63608.8	56543.3	45084.6	34288.2	33941.9
76000000000	17981.8	79326.7	62244.5	63934.9	56905.8	45527.3	34275.6	33871.4
77000000000	17946.7	79691.8	62526.5	64248.8	57342.6	45871.3	34413.2	34023.6
78000000000	17840.7	80231.9	63026.5	64811.3	57619.1	46021.2	34515.3	34026.5
79000000000	17930	80780.9	63439.4	65118.9	58055.4	46196.7	34551.1	34190.1
80000000000	17859.1	81007.9	63798.9	65737.6	58250.7	46516.2	34638	34037.8
81000000000	17874.3	81317.1	64405.9	65783.7	58667.8	46797.8	34785.8	34230.9
82000000000	17917.8	81715.7	64730.2	66381.8	59130.6	47157.9	34849.3	34291.4
83000000000	17839.3	82157.8	65007.4	66734.9	59298.1	47516.7	34798.8	34395.4
84000000000	17916	82550.6	65410.1	67268.1	59618.6	47681.5	35031.8	34481.5
85000000000	17789.4	82968.4	65818.6	67545.3	60081.3	47940.2	35092.8	34475.4
86000000000	17916.9	83397.4	65969.3	67996	60460.3	48243.7	35149.7	34686.1
87000000000	17844.4	83663.2	66486.3	68324.2	60842.2	48484.2	35156.8	34705.6
88000000000	17889.9	84141.1	66956.3	68687.1	61042.7	48860.5	35315.7	34753.9
89000000000	17842.8	84581.4	67249.4	69078.2	61563.5	49102.8	35276.7	35005
90000000000	17785.2	85019.9	67587.7	69496.7	61825.8	49394	35397.8	34722.7
91000000000	17851.8	85070.9	68280.9	70030.2	62391.5	49677.6	35493.7	34988.9
92000000000	17870.2	85741.2	68588.3	70307.3	62633.3	50075.9	35459.2	34888.7
93000000000	17865.6	85923.5	68883.8	70713.8	62920.2	50344.4	35597.1	35013.4
94000000000	17918.7	86316.9	69336.9	71081.8	63258.1	50427.4	35701.8	35143.4
95000000000	17880.2	86712.7	69723.4	71425.5	63539	50903.1	35910.3	35335.5
96000000000	17862.4	87084.6	69935.6	71852	63728.3	51078.9	35890.8	35365.1
97000000000	17821.1	87344.9	70352.4	72260.8	64272.3	51432.7	35856.5	35342.2
98000000000	17829.2	87789.1	70616.4	72506.7	64441.3	51592.1	35971.5	35372
99000000000	17900.6	88068.3	71010.6	72934.1	64729	51956.5	36178.1	35511.9
100000000000	17876	88444.7	71348.6	73422.3	65214.8	52299.2	36227.2	35555.9
101000000000	17859.6	88857	71791	73651.5	65346.6	52395	36243.6	35590.8
102000000000	17874.3	89097.4	72095.9	74014.1	65904.8	52881.4	36301	35705
103000000000	17823.4	89403.3	72254.2	74382.9	66261.2	53123.4	36470.8	35669.9
104000000000	17955.6	89818.4	72914.1	74797	66382.6	53172.6	36489.6	35756.3
105000000000	17900.6	89948.1	73266.1	74970	66853.5	53671.7	36594	35878
106000000000	17827.8	90517.8	73490.2	75362.4	67286.5	53882	36544	35946.3
107000000000	17877	90724.7	73693.5	75904	67361.2	54157.9	36773	36055.4
108000000000	17784.4	90934.8	74463.8	76197.7	67885.7	54417.9	36954.5	36070.7
109000000000	17823.8	91185.4	74558.1	76390.6	68301.1	54724.4	36960.6	36157.7
110000000000	17877.1	91789.6	75087.2	76961.9	68466.2	55004.2	37001.1	36092
111000000000	17841.5	91853	75391.8	77305.8	68754.5	55342.9	37084.5	36207
112000000000	17814.5	92242.5	75813.6	77706	69209	55600.7	37289.5	36271.3
113000000000	17804	92664	76069.3	78015	69398.9	55781.5	37257.1	36361.2
114000000000	17876.1	92891.4	76644.5	78340.8	69671.7	55885.4	37315.8	36393.7
115000000000	17725.6	93235.9	76687	78652.9	70053.2	56491	37465.1	36442
116000000000	17847	93483.5	76956.9	78770.4	70258.1	56584	37513.1	36665.2
117000000000	17757.1	93704.9	77510.3	79125.2	70447.4	56941.4	37585.8	36620.1
118000000000	17834.3	94005.8	77746.4	79565.2	71025.2	57087.3	37672.2	36633.2
119000000000	17871	94245.4	78110.5	79915.5	71279.9	57388.9	37884.2	36823.5
120000000000	17765.3	94528.7	78140.1	80217.6	71480.1	57615.3	37847.7	36914
121000000000	17739.4	94777.9	78601.8	80567.6	71711.7	57950	38045.7	36962.5
122000000000	17782.5	95090.7	78843.6	80930.1	71943.9	58154.1	38010.5	37017.9
123000000000	17745.9	95501.9	79178	81144.2	72394	58370.8	38159.4	37076.7
124000000000	17795.7	95759.3	79609	81560.5	72720.3	58735.5	38194.8	37024.2
125000000000	17733.8	95874	79700.6	81761.5	72952.7	58933.3	38369.2	37254.5
126000000000	17811.2	96124	80198.3	82121.9	73168.4	59182.3	38341.7	37367.9
127000000000	17800.9	96441.1	80381.6	82404.6	73596.8	59244.4	38466.6	37314
128000000000	17736.2	96565	80763.7	82905.2	73638.4	59718.4	38457.2	37388.9
129000000000	17839.6	96971.9	80670	82990.3	74026.6	60007.2	38650.4	37565.8
130000000000	17821.5	97106.4	81376.7	83356.8	74523.6	60158.2	38703.3	37470.2
131000000000	17781.6	97343.6	81640.6	83841.1	74694.2	60373	38855.8	37505.8
132000000000	17811.1	97859.6	81923.5	83859.7	74824.6	60736.5	38928.3	37685.4
133000000000	17832.1	98123	81913.7	84364	75156.5	60920.9	38935	37547.9
134000000000	17789.8	98336.6	82467.9	84432.2	75476	61328.2	39226.7	37915.9
135000000000	17806.7	98597.4	82848	84957.4	75765.2	61237.8	39083.8	37856.5
136000000000	17852.2	98592.8	82957.2	85164.4	76118.6	61636.3	39167.4	37908.8
137000000000	17846	98823.4	83399.6	85379	76267.5	61924.2	39443.1	38065.8
138000000000	17770.7	99193.5	83359.8	85635.6	76421.5	62221.9	39347.1	38076
139000000000	17778.9	99411.1	83868	86110.3	76878.7	62669.4	39458.1	38132.1
140000000000	17787.1	99601.8	83846.4	86212.9	76936.9	62912.7	39631.5	38236.2
141000000000	17766.8	99956	84092.7	86770.4	77132.7	63061.3	39653.2	38376.2
142000000000	17783	100030	84403.2	86854.7	77397.4	63515.6	39653.6	38358.7
143000000000	17846	100391	84630.4	87235.5	77851.8	63659.4	39829.9	38396.9
144000000000	17719.8	100524	84904.6	87372.8	78077.1	63817	39945.4	38631.5
145000000000	17712.5	100968	85174.9	87698.2	78441.5	64066	40062.4	38581.3
146000000000	17776.6	100954	85506.8	87959.1	78672.9	64484.2	40091.5	38759.3
147000000000	17714.7	101388	85745.8	88183	78921.6	64732.7	40197.3	38763.9
148000000000	17773.3	101627	85983.1	88388.6	78973.6	64806.9	40272	38700.3
149000000000	17699.8	101606	86218.2	88777	79300.2	65231.2	40375.8	38883.8
150000000000	17698.9	101851	86253.3	89263.6	79506.5	65428.7	40440	38926.9
151000000000	17737.3	102171	86583.8	89209.1	80026	65568.7	40542.3	39064.4
152000000000	17823.9	102273	86948	89644.4	80067.5	65921.2	40656.8	39066.3
153000000000	17764.2	102641	87029.1	89784.8	80333.8	65857.1	40617.2	39222.5
154000000000	17728.8	102915	87434.4	90105.2	80700.5	66111.1	40893.1	39230.3
155000000000	17751.2	102990	87652	90337.1	80910	66205.5	40833.8	39412.9
156000000000	17772.5	103028	87712.8	90487.7	81211.7	66752.6	40970.7	39443.4
157000000000	17681.2	103197	87887.2	90913.5	81180.7	66693.5	41184.6	39569.4
158000000000	17776.4	103654	88420	91191.4	81730.9	67018.6	41249.4	39633.3
159000000000	17682.1	103763	88472.2	91361.9	81710.4	67207.5	41267.4	39684.2
160000000000	17715.5	103937	88673.1	91562.6	82165.9	67272.9	41339	39568.3
161000000000	17709.3	104139	88973.8	91836.5	82265.5	67589.9	41330.5	39779.3
162000000000	17750	104415	89151.1	92106.3	82509.7	67854.5	41426.4	39944.8
163000000000	17697.5	104749	89221.2	92301	82667.3	68119.1	41532.8	40017.7
164000000000	17766.4	104766	89567.8	92600	82892.7	68200.8	41577.2	40000.6
165000000000	17747.2	104971	89721.5	92803.8	83210.4	68646	41744.5	40121.8
166000000000	17781.9	105082	90009.4	92976.1	83493.9	68636.2	41926.9	40246.2
167000000000	17715.4	105383	90092.7	93162.3	83627.5	68807.4	41944.3	40251.6
168000000000	17714.3	105407	90349	93551.8	83673.2	69082.6	42010.5	40387.1
169000000000	17757.8	105566	90585.9	93734.5	84033	69400.5	42005.3	40402.3
170000000000	17704.9	105896	90627.4	93909.8	84262.3	69402.7	42152.2	40531.1
171000000000	17638.7	106033	91086.3	94127.2	84445.5	69766.2	42243.3	40679.7
172000000000	17652.3	106247	91060	94324.6	84610.3	69885.8	42343.4	40698.1
173000000000	17760.6	106542	91284.1	94527.8	84860.6	70107	42488.9	40612
174000000000	17746.7	106521	91570.7	94813.1	84854.3	70352.9	42572.4	40829.9
175000000000	17623.1	106682	91763.5	95037	85416.4	70462.2	42568.7	40994.9
176000000000	17772.1	106759	91621.6	95242	85441.8	70675.4	42647.2	40926.4
177000000000	17706.4	107042	92191.9	95510.5	85879.8	70878.2	42755.1	40978.4
178000000000	17640.2	107332	92231.3	95507.4	85853	71039	42884.8	41187
179000000000	17657	107350	92453.9	95781	86131.2	71262.4	42815.1	41199.7
180000000000	17737.9	107593	92490.5	95984.9	86395.8	71452.1	42971.4	41328.1
181000000000	17662.3	107841	92942	96339.9	86681.8	71624.1	43119	41447.1
182000000000	17676.8	107775	93040.2	96579.5	86815.9	71896.7	43148.8	41474.6
183000000000	17687.4	108167	93274.2	96437.5	87027.1	72034.3	43406	41482.1
184000000000	17750.3	108196	93399	97079	87169.4	72191.3	43426.8	41698
185000000000	17716.3	108419	93527.2	97232	87352.7	72297.9	43498.4	41762.3
186000000000	17669	108337	93765.1	97143	87409.5	72610.5	43612.4	41817.7
187000000000	17682.8	108714	93942.8	97553.1	87640.1	72766.3	43502.5	41834.3
188000000000	17659.4	108789	94037.3	97716.4	87799.3	72861.3	43671.3	42042.2
189000000000	17631.9	109196	94257	97792.3	88027.5	73094.3	43743.9	42143.3
190000000000	17732.9	109448	94293.1	97991.2	88405.1	73232.5	43792.3	42132.7
191000000000	17699.8	109380	94812.3	98237.6	88576.9	73403.6	44026.5	42258.7
192000000000	17736.2	109495	94837.6	98659.5	88682.8	73552.6	44098	42287.8
193000000000	17567	109725	94881.4	98754.7	89054.2	73814.6	44080.4	42371.9
194000000000	17715.1	109777	95152.3	98960.9	89009.2	73978.4	44221.6	42370.9
195000000000	17683.5	109974	95410.3	98948.4	89193.8	74109.9	44360.7	42587.4
196000000000	17772.7	110099	95541.3	99164	89286.7	74135.7	44428.9	42645.5
197000000000	17696.7	110203	95618.7	99442.2	89778	74408.6	44399.7	42756.5
198000000000	17720.4	110444	95709	99643.2	89739.4	74597.1	44516.2	42797.3
199000000000	17680.9	110545	95849.6	99872.9	89991.9	74991.4	44643.8	42934
200000000000	17631.3	110737	96153	100024	90183.5	75033.9	44707.2	42703.4
201000000000	17661.9	110763	96120.4	100099	90192.9	75234.5	44838	42923.7
202000000000	17651.8	110845	96460	100166	90435.9	75113.1	44899.6	43091.9
203000000000	17724.2	111139	96555.5	100665	90637.4	75429.1	44866.9	43146.9
204000000000	17652	111076	96662	100730	90767	75516.1	45002.7	43272.6
205000000000	17656.3	111503	96893.4	100879	90860.3	75729.2	45119.1	43419.5
206000000000	17668	111420	97137.4	100918	91167.1	75978	45271.2	43423.7
207000000000	17608.3	111598	97229.4	101251	91345.2	76127.8	45295.4	43406.3
208000000000	17657.4	112006	97063.8	101308	91638.7	76312.3	45316.8	43675
209000000000	17634.4	111807	97479	101603	91715.9	76153.1	45246.6	43650.5
210000000000	17662.3	111871	97766.2	101677	92023.2	76479.9	45393.8	43732.6
211000000000	17616.6	112225	97821.7	102065	92007.1	76822.8	45597.5	43815.6
212000000000	17590.2	112370	97972.6	102249	92167.4	76862.6	45612	44052
213000000000	17690.5	112417	97901.8	102237	92375.7	76849.3	45793.5	44005.9
214000000000	17662.4	112550	98143.2	102480	92383.4	77293	45829.5	44080.3
215000000000	17615.5	112933	98379.2	102735	92734.5	77289.7	46010.6	44161.7
216000000000	17711.1	112917	98479.5	102881	92715.7	77427	46059.1	44068.5
217000000000	17600.5	112821	98710.2	102700	92913.9	77703.8	46071.9	44307.2
218000000000	17600.1	113091	98688.5	103193	93245.2	77777.3	46347.6	44346.6
219000000000	17687.7	113189	98903	103300	93448.6	77980.6	46404.5	44584.4
220000000000	17522.7	113091	99014.4	103241	93407.2	78075.1	46383.4	44611.4
221000000000	17590.1	113494	99114.5	103615	93586.9	78105	46501.7	44620.4
222000000000	17593.6	113625	99317.3	103894	93688	78457.8	46581.6	44658.4
223000000000	17541	113603	99555.8	104000	94074.4	78684.8	46655.1	44660.7
224000000000	17658.6	113647	99530.5	104044	94170.6	78453	46622.8	44817.7
225000000000	17678.5	113805	99805.5	104382	94204.5	78781	46714.6	44817.2
226000000000	17636.5	113986	99697.4	104376	94407.2	79045.5	46840.3	45075.4
227000000000	17666.6	114184	99929.3	104466	94409.4	79046.7	46990.8	45131.9
228000000000	17667.3	114234	99814.5	104690	94742.2	79242.6	47114.7	45151
229000000000	17710.2	114130	100183	104922	94648.1	79471.2	47052	45154.2
230000000000	17567.8	114367	100401	104970	94850.8	79398.1	47212.5	45385.2
231000000000	17630	114582	100271	105178	95146.9	79689	47294.8	45429.3
232000000000	17660.1	114684	100589	105270	95381.1	79982.9	47356.5	45421
233000000000	17580.5	114843	100482	105263	95529.8	79964.8	47413.8	45498.8
234000000000	17646.5	114750	100797	105649	95421	80123.1	47569.6	45605.5
235000000000	17603.2	114972	101043	105550	95756.8	80156	47682.2	45745.5
236000000000	17597.9	115151	100958	105624	95880.5	80325.9	47665.6	45877.2
237000000000	17607.1	115133	101178	105976	96069.5	80306.1	47729	45887.4
238000000000	17602	115322	100942	106101	96226	80526.5	47766.7	45890
239000000000	17666.3	115211	101625	106322	96397.5	80841.3	47805.3	46102.6
240000000000	17575	115442	101521	106440	96326.8	80722	47838	46060.8
241000000000	17575	115723	101538	106537	96675.8	80959.5	48187.4	46196.9
242000000000	17594	115613	101907	106453	96622.1	81107.1	48088.6	46245.8
243000000000	17630.2	115965	101908	106894	96871.3	81154.3	48218.4	46339.7
244000000000	17595.6	115768	101774	106981	96991.6	81293	48218.3	46461.9
245000000000	17633.4	116017	102064	107051	96977.6	81499.4	48368	46555.2
246000000000	17600.5	115867	102226	107249	97379.1	81527.5	48378	46671.7
247000000000	17642.7	116454	102314	107304	97359.9	81564.2	48463.1	46586.6
248000000000	17602	116397	102241	107355	97566.9	81804.5	48559.3	46591.2
249000000000	17595.9	116373	102543	107693	97775.7	82086.7	48630.3	46731.8
250000000000	17627	116226	102535	107806	97684.1	82091	48709.7	46755.7
251000000000	17628.1	116725	102606	108104	97927.3	82273.6	48723.7	46918.7
252000000000	17528.7	116566	102851	107957	97946.7	82355.4	48804.5	47122.8
253000000000	17650.2	116791	102875	108030	98286.9	82458.4	48933.4	47043.6
254000000000	17620.5	116978	102969	108309	98325.1	82511.3	48985.4	47196.1
255000000000	17512.9	116848	102775	108185	98438.6	82804.6	49116.4	47143.5
256000000000	17506.2	117195	103265	108398	98546.2	82800.7	49185.6	47355.4
257000000000	17605.5	116809	103313	108527	98873.5	82890.1	49352.3	47425.2
258000000000	17618.4	117266	103586	108770	98703.5	83001.9	49423.9	47450.1
259000000000	17569.4	117023	103570	108871	98908.7	83314.8	49515.3	47573.6
260000000000	17625.7	117264	103694	109088	99012.5	83384.6	49533.4	47625.2
261000000000	17577.4	117542	103644	109099	99281.9	83496.6	49596	47702.4
262000000000	17526.2	117721	103865	109208	99197.6	83599	49587.1	47739.1
263000000000	17562	117627	103864	109589	99316.3	83695.1	49701.7	47823.9
264000000000	17595.4	117928	104109	109428	99688	83860.2	49793.9	47914.6
265000000000	17477.9	117890	104145	109593	99604.9	84069.1	49808.9	47911.4
266000000000	17497.6	117988	104343	109623	99764.5	84193.8	49818.2	47918.9
267000000000	17602.2	117928	104440	109894	99723.5	84084.9	49931.2	48002
268000000000	17531.4	118198	104230	109862	100067	84169.2	50095.6	48100.4
269000000000	17652.8	118259	104569	109958	99993.5	84203.3	50188.3	48241.1
270000000000	17605.1	118257	104459	110033	100312	84399.9	50182.9	48187.3
271000000000	17560.5	118364	104593	110317	100313	84527.2	50301.3	48499
272000000000	17548.2	118391	104682	110613	100358	84786.4	50397.1	48356.1
273000000000	17592.3	118354	104621	110404	100695	84894.1	50564.7	48541.8
274000000000	17549.6	118540	104626	110485	100495	84971.8	50548.4	48644.7
275000000000	17581.6	118557	104878	110535	100739	85103.2	50611.2	48691.6
276000000000	17564	118748	104951	110844	100936	85273.6	50569.5	48838.9
277000000000	17480.1	118746	105222	111075	101202	85172.4	50789.1	48929.2
278000000000	17559.2	118820	105205	111092	101252	85343.9	50779.9	48829.4
279000000000	17518.2	118919	105439	111050	101215	85353.1	50746.9	48892
280000000000	17520.8	119029	105355	111036	101273	85409.1	51046.2	49032.9
281000000000	17540.6	118831	105493	111541	101360	85539.4	51068.8	49093.3
282000000000	17622.5	119013	105674	111628	101493	85777.4	51027.1	49158.7
283000000000	17519.4	119160	105627	111533	101724	85842.9	51139.9	49262.4
284000000000	17477.7	119336	105776	111646	101609	85937.1	51324.7	49321.5
285000000000	17565.6	119610	105657	111816	101871	86017.9	51266.7	49500.3
286000000000	17545.1	119379	105806	111905	102065	86056.6	51576.3	49553.5
287000000000	17629.1	119785	105970	112073	102119	86347.7	51390.9	49390
288000000000	17556.2	119434	106022	112134	102170	86407.9	51641.9	49738.5
289000000000	17620.8	119813	105993	112221	102388	86456.6	51658	49808.6
290000000000	17631.2	119703	106123	112262	102360	86440.3	51668.6	49784.3
291000000000	17557.9	119957	106137	112486	102575	86407.7	51790	49734.7
292000000000	17624.9	119815	106340	112531	102702	86625.6	51797.9	49799.7
293000000000	17571.4	119987	106358	112737	102624	86779.3	51953.4	49933.4
294000000000	17522.2	120019	106358	112668	102901	86790	51923.1	49986
295000000000	17516.8	119942	106331	112880	102873	86927.9	52062.7	50095.4
296000000000	17601.5	120168	106737	112798	102907	87279.8	52001	50226.4
297000000000	17607.3	120098	106632	112847	103374	87208	52113.4	50199.2
298000000000	17558.4	120223	106731	113199	103132	87351.1	52342.9	50312.3
299000000000	17446.2	120434	106993	113251	103143	87378.7	52261.8	50320.6
300000000000	17528.5	120438	107045	113429	103382	87553.7	52446.1	50353.9
301000000000	17569.4	120624	107001	113476	103497	87502.6	52386.6	50442
302000000000	17449	120428	107170	113313	103839	87371.9	52610.8	50612.2
303000000000	17519.7	120809	107357	113505	103674	87757.1	52547.8	50804
304000000000	17566.6	120556	107282	113551	103929	87800.7	52619.9	50664.2
305000000000	17584.3	120902	107422	113564	103992	87911.6	52609.4	50883.1
306000000000	17575.4	120708	107377	113701	104112	87980.6	52773.6	50798
307000000000	17515.1	120621	107580	114053	103923	88118.2	52856.3	50884
308000000000	17546.2	120730	107383	114132	104299	88207.4	52876.6	51010.5
309000000000	17480.4	120860	107640	113938	104328	88197.8	53033.2	50942.6
310000000000	17536.3	121119	107692	114299	104386	88334.2	52915.8	50880.7
311000000000	17485.4	121021	107905	114424	104255	88567	53084.4	51166.3
312000000000	17486.8	121048	107853	114507	104558	88689.8	53244.7	51243.2
313000000000	17543.2	120984	107833	114533	104823	88509	53249.5	51203.2
314000000000	17608.8	121542	107683	114747	104663	88676.8	53296.7	51468.7
315000000000	17515.7	121382	107761	114732	104805	88895.6	53253.2	51462
316000000000	17562.7	121448	108006	114868	104905	89037	53528.6	51460.9
317000000000	17466	121286	108062	114778	104998	88907.9	53419.5	51601.4
318000000000	17545.2	121517	108141	115143	104924	89162.4	53532.5	51724.2
319000000000	17533	121657	108245	114925	104883	89031.1	53581	51635.8
320000000000	17464.2	121766	108046	114993	105271	88987.4	53686.7	51808.6
321000000000	17483.9	121536	108346	115074	105289	89233.5	53623.4	51884.1
322000000000	17522.2	121572	108421	115248	105345	89448.4	53792.7	51808
323000000000	17533.4	121691	108239	115340	105398	89382.7	53962.4	51938.1
324000000000	17509	121715	108450	115536	105670	89591.7	54075.3	51994.5
325000000000	17564.8	121781	108415	115523	105567	89495.3	53887.5	52115.1
326000000000	17568.5	121882	108640	115521	105756	89686.5	54034.2	52216.2
327000000000	17524	121791	108801	115460	105833	89827.2	54060.3	52181.7
328000000000	17591.6	122045	108597	115665	105982	89779	54273.4	52297.1
329000000000	17521.2	122139	108533	115696	105948	90097.2	54414.8	52426.4
330000000000	17483.6	122248	108720	115822	105835	90134.9	54234.1	52470.2
331000000000	17474	122134	108718	116034	106068	89958.1	54347.5	52425.1
332000000000	17520	122251	108842	116032	106010	90035.4	54640.6	52622.8
333000000000	17467.3	122324	108917	116151	106212	90118.5	54442.2	52479.6
334000000000	17483.7	122538	108980	116188	106221	90200.2	54477.1	52697.2
335000000000	17479.2	122356	109036	116261	106691	90536.2	54566.6	52857.6
336000000000	17566.1	122481	109287	116398	106506	90423	54786	52717.9
337000000000	17498.1	122440	109293	116438	106597	90547.7	54757.7	52784.7
338000000000	17635.5	122662	109087	116640	106699	90586.4	54793.9	52978.5
339000000000	17496.3	122456	109267	116640	106730	90509.9	54778.4	52996.8
340000000000	17525.6	122671	109431	116596	106775	90652.8	55023.4	52975.2
341000000000	17554.1	122676	109228	116772	106886	90885	54897.3	53133.5
342000000000	17446	122739	109494	116803	106954	90991.3	55214.7	53222.4
343000000000	17546.3	122740	109432	116634	106798	90908.1	55179.2	53141.3
344000000000	17450.8	122710	109400	116797	107141	90993.3	55119.8	53419.5
345000000000	17506.5	123062	109727	116960	107315	91133.4	55374.2	53266.2
346000000000	17545.2	122780	109621	117125	107350	91270.5	55431.3	53370.3
347000000000	17538.2	122961	109585	117167	107370	91366.6	55391	53571.9
348000000000	17530.3	123042	109778	116974	107431	91527.9	55248.5	53662.3
349000000000	17484.9	123315	109660	117168	107422	91351.6	55579.2	53596
350000000000	17394.5	123439	109781	117305	107528	91356.1	55615.9	53712.5
351000000000	17440.6	123367	109798	117250	107495	91366.5	55721.3	53641.3
352000000000	17479.5	123384	109904	117458	107756	91610.5	55677.6	53810.1
353000000000	17447.3	123059	109873	117774	107659	91637.5	55803.2	53959.3
354000000000	17583.7	123463	110081	117491	107730	91810.3	55833.4	54146.5
355000000000	17455.9	123480	110029	117557	107977	91704.9	55933	54043.3
356000000000	17500.1	123820	110162	117524	107933	91956.5	56063.9	54048.6
357000000000	17460.6	123435	110237	117805	107964	91989.4	56104.8	54173.9
358000000000	17449	123723	110141	117884	108055	92177.1	55959.8	54219
359000000000	17566.6	123376	110189	117748	108165	92118.9	56118.9	54128.7
360000000000	17485.1	123503	110393	117868	108141	92168.1	56136.7	54302.2
361000000000	17576.2	123525	110279	117904	108312	92241	56305	54403.2
362000000000	17492.3	123897	110382	118059	108382	92377.5	56308.1	54455.9
363000000000	17565.4	123639	110439	118240	108467	92404.9	56347.3	54542.9
364000000000	17542.6	124012	110476	118240	108487	92452.7	56247.8	54487.5
365000000000	17573.9	123987	110521	118193	108499	92489.2	56503.2	54595.1
366000000000	17533.5	123798	110722	118046	108487	92872	56400.5	54745
367000000000	17488.4	124009	110659	118147	108706	92781.2	56584.4	54683.8
368000000000	17499.7	123742	110498	118558	108713	92907.7	56637.7	54997.4
369000000000	17546.7	124160	110705	118533	108666	92804.6	56657.3	54922.8
370000000000	17519.4	124117	110625	118498	109034	93016.1	56805.9	54879.5
371000000000	17542.4	123971	110622	118636	109159	93061.4	56823.5	54919.9
372000000000	17529	123989	110733	118680	108909	92878.5	57052.5	55213.2
373000000000	17572.3	124052	110858	118716	109277	92886	57049.4	55150.9
374000000000	17409.3	124268	110868	118841	109170	93077.3	57020.5	55170
375000000000	17496.4	124100	110942	118838	109183	93252.2	57043.1	55141.8
376000000000	17549.6	124207	110889	118849	109267	93205.7	57181.1	55373.7
377000000000	17541.2	124094	110923	119055	109218	93305.3	57227.6	55228.6
378000000000	17516.1	124395	110948	118892	109434	93379.3	57260	55366.9
379000000000	17520.7	124355	111189	119029	109450	93411.1	57297.6	55393.8
380000000000	17518	124202	110889	119249	109472	93542.8	57323.5	55500.7
381000000000	17489	124289	111091	119120	109432	93455.3	57268.4	55619.6
382000000000	17483.5	124488	111234	119363	109539	93482.5	57484.4	55686.7
383000000000	17505.7	124323	110908	119281	109633	93651.6	57602.2	55583.4
384000000000	17507.3	124527	111257	119475	109668	93827.7	57689.3	55793.5
385000000000	17461.5	124384	111200	119489	109860	93767.7	57393	55737.6
386000000000	17435.3	124520	111187	119485	109945	93682.3	57856.6	55953.3
387000000000	17496.7	124865	111234	119564	109889	93918	57731.6	56012.1
388000000000	17531.9	124661	111349	119452	110011	93837.7	57840.5	55991.3
389000000000	17498.7	124805	111490	119540	110119	93879	57817.3	56076.2
390000000000	17441.6	124807	111526	119606	110115	93982.3	57920.9	56025.5
391000000000	17580.6	124820	111581	119928	110053	94116.1	57979	56248.9
392000000000	17500.9	124732	111531	119632	110049	94316	57980.2	56265.8
393000000000	17366.6	124603	111554	119878	110219	94237.5	58095.2	56246.5
394000000000	17433.1	124936	111459	120005	110541	94264.4	58062.9	56292.5
395000000000	17578.8	124755	111445	119928	110572	94303.7	58170.8	56304.1
396000000000	17463.2	124721	111755	120055	110597	94685.5	58237.3	56413
397000000000	17454.5	125045	111620	119972	110525	94599.5	58376.3	56593.9
398000000000	17471.6	124706	111570	120178	110563	94686	58420.7	56568.1
399000000000	17411	124764	111608	120052	110660	94756	58339.8	56505.1
400000000000	17403.3	125257	111683	119961	110540	94651.7	58395.1	56555.3
401000000000	17439.1	125042	111732	120029	110870	94836.8	58545.3	56814.5
402000000000	17406.8	124747	111779	120119	110943	94389.1	58623.6	56695.7
403000000000	17617.6	125102	111726	120203	110733	94770	58540.7	56876.3
404000000000	17550.2	125158	111873	120165	110999	94825.1	58747.6	56906.7
405000000000	17509	125092	111850	120525	111024	94967.5	58728.5	56823.9
406000000000	17472.7	125077	111935	120551	110881	95040.1	58825	56896.5
407000000000	17419.1	125130	112091	120378	111048	95078.7	58912.3	56998.4
408000000000	17457.6	125351	111930	120501	111143	95028	58930.3	57234
409000000000	17445.7	125165	112083	120604	111151	95143.3	58953.5	57221.6
410000000000	17526.7	125273	111866	120530	111242	95249.3	58959.6	57008.4
411000000000	17422.2	125125	112206	120712	111289	95309.6	59212.5	57338.9
412000000000	17562.7	125339	111921	120641	111383	95262.7	59006	57335.9
413000000000	17477.3	125105	112187	120800	111400	95463	59194.4	57364.4
414000000000	17465.2	125374	112184	120885	111385	95456.9	59006.6	57640.7
415000000000	17446	125397	112055	120663	111445	95497.4	59277.2	57444.8
416000000000	17520.6	125161	112344	120817	111424	95596.9	59318.5	57529.6
417000000000	17419.5	125374	112217	120910	111518	95320.3	59409	57672
418000000000	17582.1	125537	112344	120946	111549	95516.4	59455.5	57727
419000000000	17489	125557	112298	121143	111499	95785.8	59581	57712.9
420000000000	17379.1	125554	112237	121005	111637	95588.2	59506.2	57756.9
421000000000	17346.9	125604	112278	121122	111741	95818.2	59497.1	58101.1
422000000000	17417.5	125472	112255	121020	111863	95893.1	59645	57857.6
423000000000	17361.5	125719	112350	121262	111971	96018.7	59761.4	57904.1
424000000000	17471.4	125507	112434	121382	111868	95825.2	59812.4	57893.8
425000000000	17466.7	125626	112260	121019	111697	95940.2	59894.1	57958.1
426000000000	17378.1	125598	112528	121187	111851	96320.5	59652.5	58049.3
427000000000	17399.3	125496	112448	121456	112037	95998.8	59911.3	58066.6
428000000000	17540.5	125855	112514	121174	111971	96045.4	59963.5	58265.8
429000000000	17394.7	125739	112489	121481	112132	96322.2	59944.9	58420.6
430000000000	17560.6	125702	112460	121301	111989	96325	60084	58405.8
431000000000	17385.9	125836	112256	121488	112317	96291.2	60085.5	58350.5
432000000000	17397.7	125714	112657	121522	112091	96331.3	60224.2	58526.9
433000000000	17452.6	125634	112565	121636	112414	96394.8	60204.6	58452.3
434000000000	17473.8	125863	112685	121419	112302	96568.8	60306.6	58467.8
435000000000	17479.8	125835	112771	121473	112315	96473.7	60228.2	58682.2
436000000000	17566.6	126062	112624	121810	112349	96607.8	60298.7	58629.7
437000000000	17519.3	125770	112973	121691	112497	96426.6	60458.8	58595.9
438000000000	17520.6	126067	112920	121691	112420	96715.2	60396.7	58720.4
439000000000	17445.4	126025	112840	121820	112420	96467.4	60578	58931.9
440000000000	17399.2	125849	112804	121819	112581	96616.4	60540.9	58929.8
441000000000	17511.3	126165	112907	121813	112725	96650.4	60722.3	59075.4
442000000000	17461.1	126101	112996	121852	112706	96666.8	60712.4	59061.9
443000000000	17531.9	125934	112866	121994	112737	96823.2	60607.5	59068.7
444000000000	17506.6	126164	113124	121990	112533	96879.6	60667.5	59088.5
445000000000	17502	126027	112996	121983	112898	96886.7	60691.7	59269.1
446000000000	17457.2	126160	113209	121910	112728	96861.7	60930.3	59240
447000000000	17406.4	126196	113090	121857	112882	97052.9	60939.9	59392.4
448000000000	17447.5	126057	113137	122135	112941	97058.6	60958.3	59284.2
449000000000	17524.6	126101	113199	122205	112725	97291.5	61180.7	59411.6
450000000000	17511.3	126196	112940	122053	113087	97080.2	61045.6	59325.1
451000000000	17467.1	126168	113272	122348	113067	97217.4	61040.2	59427.3
452000000000	17411	126299	113337	122302	112810	97221.9	61221.4	59555.8
453000000000	17429.9	126206	113316	122243	113316	97283.7	61170.9	59575.2
454000000000	17432.7	126269	113257	122073	113126	97315.2	61300.7	59801
455000000000	17437.6	126408	113117	121952	113145	96974.5	61502.7	59596.7
456000000000	17503.1	125997	113363	122177	113133	97413.9	61311.2	59638.6
457000000000	17433.6	126244	113380	122350	113358	97383.9	61321.8	59772.5
458000000000	17455.5	126302	113151	122420	113192	97367.3	61449.2	59877.2
459000000000	17414.8	126178	113331	122609	113356	97439.5	61478.9	59979
460000000000	17431.4	126419	113310	122556	113480	97529.2	61561	59849.8
461000000000	17490.2	126066	113434	122644	113465	97493.2	61519.5	59919
462000000000	17436.9	126394	113519	122461	113342	97581.2	61591.6	60023.5
463000000000	17515.3	126412	113241	122667	113312	97775.2	61589.8	60184.4
464000000000	17477.7	126379	113328	122412	113490	97655.8	61796.3	60037.3
465000000000	17403.7	126421	113476	122379	113363	97914.5	61640.3	60259.1
466000000000	17455.2	126424	113265	122732	113532	97645.5	61866	60004.7
467000000000	17444.8	126500	113375	122791	113657	97832.1	61897.7	60277.4
468000000000	17439.3	126320	113460	122547	113715	97917.1	61797.1	60330.3
469000000000	17404.6	126434	113373	122781	113638	97841.5	61912.3	60238.8
470000000000	17439.3	126386	113628	122797	113867	97891.6	61918.9	60556.3
471000000000	17430.7	126295	113460	122686	113709	97995.4	62100.9	60444.2
472000000000	17438.8	126612	113538	122919	113963	97973.3	62109.7	60497.2
473000000000	17428.1	126485	113667	122792	113563	98029.8	62290.4	60641.4
474000000000	17329.5	126703	113547	122694	113901	97982.8	62131.1	60685.7
475000000000	17415.5	126398	113499	122792	113730	98039.2	62260.8	60663.1
476000000000	17427.7	126447	113531	122783	113997	98311.8	62276.4	60615.3
477000000000	17375.6	126407	113602	123048	113803	98339	62187.2	60788.2
478000000000	17412.8	126489	113692	122973	114085	98210	62306.9	60761
479000000000	17451.1	126637	113924	122905	114087	98374.1	62315.5	60720.3
480000000000	17437.2	126717	113462	122984	114071	98206.9	62386	60991.3
481000000000	17427	126630	113667	123151	114147	98377.1	62470.7	60996.5
482000000000	17490.6	126812	113711	122939	114287	98347.5	62400.8	61013.4
483000000000	17461.2	126802	113643	123238	114152	98297.2	62496.9	61006.2
484000000000	17516.5	126643	113918	123104	114248	98457.9	62603.7	60815.9
485000000000	17352.3	126551	113806	123132	114318	98642.8	62644.6	61287.4
486000000000	17435	126730	113870	123100	114239	98638.4	62583.9	61128.9
487000000000	17450.1	126694	113456	123256	114079	98404.2	62686.4	61373.3
488000000000	17429.7	126657	113749	123517	114434	98512.7	62742	61209.3
489000000000	17409	126927	113855	123241	114222	98612.7	62866.8	61140.5
490000000000	17468.1	126793	113826	123172	114299	98681.1	62830.4	61235.9
491000000000	17440.6	126806	113635	123388	114430	98842.6	62903.9	61436.4
492000000000	17425.7	126754	113621	123389	114411	98755.8	62951.7	61322.6
493000000000	17421	126794	114007	123059	114434	98886.3	63033.4	61310.4
494000000000	17456.6	126733	113736	123508	114567	98873.5	62965.5	61505.8
495000000000	17495.4	126872	113724	123376	114663	98744.4	62967.8	61579.7
496000000000	17387.6	126955	113844	123132	114474	99024.9	63040	61492
497000000000	17413	126925	113852	123338	114586	98753.7	62934.3	61619.1
498000000000	17374	126717	113844	123731	114551	98692.1	63076	61829.5
499000000000	17456.2	126796	113998	123623	114810	99175.2	62967.1	61777.6
500000000000	17433.4	126857	113884	123802	114640	99040.1	63223.3	61878.5
501000000000	17435.3	126794	113788	123696	114660	99232.4	63142	61907.4
502000000000	17357.8	126902	113785	123552	114793	99193.8	63228.9	61991.3
503000000000	17443.7	126858	113879	123809	114899	99242.1	63311.1	61953.1
504000000000	17404.8	127059	113784	123568	114673	99155.7	63303.1	61892.1
505000000000	17407	127030	113747	123550	114734	99441	63311.6	61909.6
506000000000	17450.8	126903	113868	123699	114955	99314.7	63339.7	62110
507000000000	17516.5	126896	113973	123952	114697	99352.6	63443.1	62091.4
508000000000	17450.2	127073	114023	123757	114899	99461	63573.7	62153.6
509000000000	17390	126795	113943	123739	114981	99382.2	63388.6	62249.4
510000000000	17464.8	126936	113908	123631	114765	99193.5	63555.2	62068.5
511000000000	17421.7	127113	113941	123684	114792	99403.4	63613.7	62223.4
512000000000	17411.2	127061	114050	123875	114996	99648.1	63632.9	62324.5
513000000000	17497.2	127028	113981	123896	114946	99737	63670	62468.3
514000000000	17412.5	126902	113879	124006	115017	99609.2	63616.5	62558.8
515000000000	17444.6	127204	114029	123748	115011	99416.7	63906.2	62606.5
516000000000	17380.4	127130	114063	123744	115071	99528.8	63723.5	62578.2
517000000000	17428.3	127111	114003	123838	115107	99580.6	63838	62587.2
518000000000	17307.5	126887	114055	123918	115147	99625.3	63791	62651.3
519000000000	17347.3	127075	113962	123944	115268	99461.4	63916.8	62685.5
520000000000	17422.2	127338	113993	123895	115188	99656	63973.6	62619
521000000000	17417.1	127159	114028	123887	115299	99756.2	63987.2	62704.9
522000000000	17446.2	127199	114196	123906	115348	99730.2	64003.6	62760.8
523000000000	17452	127308	114029	124089	115220	99772.6	63985.7	62825.4
524000000000	17388.5	126902	114022	123950	115307	99834.5	64115.3	63039.4
525000000000	17464.2	126925	114063	124017	115534	99789	63982.4	62968.7
526000000000	17378.1	127229	114259	124113	115224	99852.4	64056	63015.2
527000000000	17449.8	127246	114040	124031	115330	99957.3	64165	63067.5
528000000000	17398.8	127130	114038	124222	115384	99915.6	64164.1	63104.7
529000000000	17455.3	127039	114001	124245	115406	99901.5	64211.6	63226.1
530000000000	17355.8	127331	114125	124530	115498	99950.2	64285.7	63045
531000000000	17478.5	127202	114077	123984	115509	100067	64393.3	63124.2
532000000000	17366	127125	114102	124065	115584	100081	64478.3	63418.8
533000000000	17466.3	127106	114364	124449	115641	99989.1	64525.7	63398.3
534000000000	17368.3	127339	114011	124214	115484	100328	64442.6	63436.4
535000000000	17386.6	127237	114061	124331	115554	100200	64462.3	63508.6
536000000000	17364.1	127419	114103	124287	115705	100149	64512.7	63419.1
537000000000	17386.5	127007	114329	124362	115742	100188	64586.3	63524.8
538000000000	17383.6	126940	114282	124263	115707	100251	64552.4	63468.4
539000000000	17377.4	127301	114121	124162	115796	100397	64665.7	63545.8
540000000000	17258.2	127096	114190	124247	115606	100326	64631	63557.1
541000000000	17401.1	127100	114239	124270	115662	100571	64687.1	63489.4
542000000000	17371.8	127122	114137	124332	115766	100455	64770.2	63651.4
543000000000	17391.2	127297	113898	124439	115744	100287	64766	63597.8
544000000000	17428.3	127452	114180	124436	115655	100363	64738.4	63521.5
545000000000	17372.9	127448	113983	124471	115883	100304	64812	63728.3
546000000000	17410.7	127418	114329	124434	115893	100453	64892.3	63699.1
547000000000	17433.3	127366	114273	124688	115989	100499	64890.8	63750.6
548000000000	17406.2	127349	114403	124441	116072	100418	64822.3	64011.8
549000000000	17344.1	127465	114299	124324	115832	100448	64964.7	63690.4
550000000000	17366.4	127169	114238	124590	115836	100494	64904.1	63962.4
551000000000	17446.2	127366	114429	124451	115665	100480	64983.8	64040.7
552000000000	17378.8	127433	114200	124312	116105	100626	65068.6	64207.8
553000000000	17380.6	127530	114487	124536	116007	100670	64996.3	64226.3
554000000000	17303.9	127296	114202	124598	115918	100695	65106.6	64044.3
555000000000	17407.6	127602	114580	124437	116033	100718	65129.2	64052.5
556000000000	17456.8	127230	114335	124292	115757	100545	64992	64300.4
557000000000	17408.8	127357	114212	124601	115884	100930	65153.9	64370.3
558000000000	17455.8	127233	114400	124753	116043	100695	65457.7	64437.3
559000000000	17379.9	127148	114278	124530	115969	100764	65276.2	64309.7
560000000000	17389.7	127505	114264	124790	115825	100781	65367.6	64122.4
561000000000	17356.2	127366	114354	124500	115862	100949	65284.8	64509.2
562000000000	17395.9	127430	114243	124575	116377	101030	65376.5	64471.4
563000000000	17419.9	127552	114342	124571	116256	100911	65338	64492.5
564000000000	17381.6	127483	114333	124702	116255	100935	65486	64506.1
565000000000	17429.1	127517	114398	125000	116071	100937	65464.2	64445.4
566000000000	17366.5	127431	114357	124707	116177	100985	65713.9	64589.3
567000000000	17292	127562	114212	124836	115984	101148	65498.5	64651.1
568000000000	17440.4	127581	114372	124556	116300	101033	65435.6	64699.1
569000000000	17280.8	127349	114358	124750	116387	100880	65634.9	64690.1
570000000000	17358.3	127214	114496	124796	116344	101008	65680.5	64587
571000000000	17309.1	127437	114425	124808	116234	101115	65717	64890.4
572000000000	17419.8	127598	114480	124845	116343	101020	65706.4	64827.4
573000000000	17357.7	127885	114456	125025	116208	100967	65650.8	64752.9
574000000000	17483.1	127510	114327	124871	116181	101200	65658.5	64894.8
575000000000	17372	127389	114319	124553	116154	101083	65747.3	65086.7
576000000000	17371	127444	114339	124928	116439	101189	65822.9	64983.1
577000000000	17396.3	127577	114439	124755	116368	101253	65893.3	64870.3
578000000000	17389.4	127373	114241	124932	116359	101387	65899	65154.7
579000000000	17385.2	127512	114291	124956	116368	101325	65879.1	65052.6
580000000000	17363.1	127476	114340	125013	116644	101235	65911.7	65128.3
581000000000	17401.8	127501	114328	124889	116391	101397	65948.2	65342.6
582000000000	17291	127369	114255	124969	116441	101262	66085.1	65151.1
583000000000	17396.3	127542	114348	124991	116463	101577	66132.9	65217.3
584000000000	17305.3	127517	114471	125103	116270	101306	66025.8	65076.3
585000000000	17332	127691	114408	124870	116642	101264	66147.5	65431.9
586000000000	17288.7	127549	114464	124933	116428	101317	66161.5	65202.5
587000000000	17426.5	127660	114219	124848	116554	101530	66239.9	65345.2
588000000000	17424.6	127619	114366	125150	116751	101543	66160.3	65353.4
589000000000	17378.4	127635	114178	125135	116740	101624	66108.9	65296.4
590000000000	17295	127737	114466	125139	116492	101488	66194.8	65319.2
591000000000	17385.2	127714	114193	124827	116545	101301	66187.6	65497
592000000000	17380.4	127572	114545	124956	116475	101715	66217.7	65568.8
593000000000	17397	127537	114315	125099	116685	101701	66359.5	65457.2
594000000000	17418.7	127588	114375	124936	116716	101516	66462.7	65549
595000000000	17410.2	127661	114233	125146	116553	101711	66314.4	65584.8
596000000000	17354.4	127339	114537	124968	116662	101705	66315.8	65742
597000000000	17392.4	127453	114287	125036	116538	101792	66424.6	65692.1
598000000000	17432.4	127680	114482	125160	116795	101537	66589.2	65629.2
599000000000	17357.3	127640	114269	125043	116850	101789	66577.7	65737.4
600000000000	17414.8	127879	114430	124932	116799	101730	66509.7	65949.4

## Sheet: Sheet1
Time(s)	Control	0mM	0.41mM	0.83mM	1.66mM	3.33mM	6.66mM	13.33mM														Time(s)	Control	no G3P	0.41mM	0.83 mM	1.66 mM	3.33 mM	6.66 mM	13.3 mM
0	18167	39163.5	33198.8	36517.1	34244.2	29888	28966.9	29656.6														0	181.67	391.635	331.988	365.171	342.442	298.88	289.669	296.566
1	18155.9	39507.5	33574.1	36780.2	34390.4	30055.4	29118.9	29885.6														1	181.559	395.075	335.741	367.802	343.904	300.554	291.189	298.856
2	18127.8	39945.1	33751.9	37138.1	34755.4	30126.1	29021.9	29791.6														2	181.278	399.451	337.519	371.381	347.554	301.261	290.219	297.916
3	17981.9	40400.4	34059.3	37270.3	34904.8	30330.9	29137.4	29969.4														3	179.819	404.004	340.593	372.703	349.048	303.309	291.374	299.694
4	18047	40787	34323.1	37425.2	35233.3	30580.3	29184.5	29971														4	180.47	407.87	343.231	374.252	352.333	305.803	291.845	299.71
5	18040	41290.8	34504.3	37807.8	35223.1	30653.3	29480.8	29976.6														5	180.4	412.908	345.043	378.078	352.231	306.533	294.808	299.766
6	17957.9	41748.9	34789.8	38093.6	35509.4	30715.8	29480.3	30089.6														6	179.579	417.489	347.898	380.936	355.094	307.158	294.803	300.896
7	18069.6	42308.8	35074.4	38268.7	35841.9	30953.6	29505.4	30342.3														7	180.696	423.088	350.744	382.687	358.419	309.536	295.054	303.423
8	18021.9	42729.5	35348.7	38593.8	35945.3	31082.2	29614.7	30180														8	180.219	427.295	353.487	385.938	359.453	310.822	296.147	301.8
9	18078.3	43334.6	35539.9	38775.8	36282.8	31274.3	29669.3	30376.7														9	180.783	433.346	355.399	387.758	362.828	312.743	296.693	303.767
10	18042.3	43574.8	35805.2	39081.2	36429	31427.9	29732.5	30437.4														10	180.423	435.748	358.052	390.812	364.29	314.279	297.325	304.374
11	18173.6	44329.5	36129.7	39287.6	36618.1	31493.3	29856.1	30418.5														11	181.736	443.295	361.297	392.876	366.181	314.933	298.561	304.185
12	18024.2	44733.8	36333	39653.1	36871.7	31742	29817.4	30540.2														12	180.242	447.338	363.33	396.531	368.717	317.42	298.174	305.402
13	18111.9	45354	36514.8	39847.9	37167.2	31891.6	29992	30523.5														13	181.119	453.54	365.148	398.479	371.672	318.916	299.92	305.235
14	18050.5	45900.4	36892.7	40204.1	37367.4	32102.9	30101.3	30623.1														14	180.505	459.004	368.927	402.041	373.674	321.029	301.013	306.231
15	18063.4	46515.4	37120.1	40404.3	37522.3	32220.6	29998.3	30762.9														15	180.634	465.154	371.201	404.043	375.223	322.206	299.983	307.629
16	18067.9	47092.9	37514.9	40818	37662.2	32392.5	30081	30643.6														16	180.679	470.929	375.149	408.18	376.622	323.925	300.81	306.436
17	18038.7	47535.5	37873.8	40993.3	37908.7	32571.5	30311.6	30756.8														17	180.387	475.355	378.738	409.933	379.087	325.715	303.116	307.568
18	18038.8	48196.6	38171.3	41411.3	38197	32648.1	30298.3	30966.3														18	180.388	481.966	381.713	414.113	381.97	326.481	302.983	309.663
19	18033.8	48698.4	38373.3	41704.6	38587.6	32861.5	30448.2	30869.1														19	180.338	486.984	383.733	417.046	385.876	328.615	304.482	308.691
20	18141.3	49238.1	38659	41818.2	38709.3	33074.1	30418.7	31003.8														20	181.413	492.381	386.59	418.182	387.093	330.741	304.187	310.038
21	18038	49769.8	38997.2	42286.6	39014.6	33156	30537.2	30878.2														21	180.38	497.698	389.972	422.866	390.146	331.56	305.372	308.782
22	18056	50398.3	39498.8	42399.8	39171.3	33371.1	30557.5	31012.7														22	180.56	503.983	394.988	423.998	391.713	333.711	305.575	310.127
23	18100.6	50793.6	39646.3	42988.8	39450.8	33625.8	30607.9	31120.1														23	181.006	507.936	396.463	429.888	394.508	336.258	306.079	311.201
24	18081.8	51596.2	40058.5	43263	39852.1	33661.1	30722.1	31288.5														24	180.818	515.962	400.585	432.63	398.521	336.611	307.221	312.885
25	18040.8	52148.4	40412	43553.8	40107.7	33933.3	30755.3	31192.1														25	180.408	521.484	404.12	435.538	401.077	339.333	307.553	311.921
26	18031	52842.9	40687.2	44073.8	40266.1	34123.3	30886.8	31284.1														26	180.31	528.429	406.872	440.738	402.661	341.233	308.868	312.841
27	18061.6	53268.6	41214.3	44165.9	40624	34177.9	31042.6	31254.2														27	180.616	532.686	412.143	441.659	406.24	341.779	310.426	312.542
28	18124.3	53932.3	41532.5	44524	40781.7	34299	31023.8	31385.2														28	181.243	539.323	415.325	445.24	407.817	342.99	310.238	313.852
29	18022.8	54536.5	41873.6	45006.4	41131.3	34373.4	31123.9	31537.2														29	180.228	545.365	418.736	450.064	411.313	343.734	311.239	315.372
30	18034.8	55188.3	42151	45254.7	41407.4	34740.3	31146.2	31491.9														30	180.348	551.883	421.51	452.547	414.074	347.403	311.462	314.919
31	18044.3	55846.6	42444.9	45679.9	41768.5	34770.1	31263.5	31454.9														31	180.443	558.466	424.449	456.799	417.685	347.701	312.635	314.549
32	18108	56328.2	42806.6	45986.2	41945.7	35036.2	31381.3	31600.4														32	181.08	563.282	428.066	459.862	419.457	350.362	313.813	316.004
33	18046.6	56913.5	43247.8	46318.8	42211.8	35392.6	31396.9	31669.2														33	180.466	569.135	432.478	463.188	422.118	353.926	313.969	316.692
34	18093.1	57540.1	43703	46733.2	42612.1	35531.7	31557.6	31561.5														34	180.931	575.401	437.03	467.332	426.121	355.317	315.576	315.615
35	17991	58120.6	44023.4	47152.8	42809.5	35637.6	31523.3	31800.8														35	179.91	581.206	440.234	471.528	428.095	356.376	315.233	318.008
36	18027.2	58707.2	44432.8	47480.7	43259.5	35708.1	31548.4	31872														36	180.272	587.072	444.328	474.807	432.595	357.081	315.484	318.72
37	18063.3	59386.5	44870.9	47956.9	43404.8	35927.5	31613.2	31715.8														37	180.633	593.865	448.709	479.569	434.048	359.275	316.132	317.158
38	18038	60024	45198.9	48375.1	43776.5	36309.4	31702	31961.3														38	180.38	600.24	451.989	483.751	437.765	363.094	317.02	319.613
39	17958.7	60486.1	45684.8	48737.4	44149.8	36444.2	31828	31959.5														39	179.587	604.861	456.848	487.374	441.498	364.442	318.28	319.595
40	18026.7	61091.4	45985.3	49143.2	44475.5	36550.5	31806.4	32135.2														40	180.267	610.914	459.853	491.432	444.755	365.505	318.064	321.352
41	18028.2	61797.4	46313.8	49462.3	44802.2	36817.2	31945.9	32123.6														41	180.282	617.974	463.138	494.623	448.022	368.172	319.459	321.236
42	18057.5	62168.5	46848.7	49952.2	45113.1	36969.3	31929.5	32119.7														42	180.575	621.685	468.487	499.522	451.131	369.693	319.295	321.197
43	18011.1	62771.1	47170.9	50220.7	45333.7	37295.2	32092.1	32344.7														43	180.111	627.711	471.709	502.207	453.337	372.952	320.921	323.447
44	18046.7	63309.6	47599.1	50708.4	45720.7	37346.1	31961.1	32238.9														44	180.467	633.096	475.991	507.084	457.207	373.461	319.611	322.389
45	18067.1	63815.8	48133.4	51033.4	46007.9	37528.6	32284.7	32334.9														45	180.671	638.158	481.334	510.334	460.079	375.286	322.847	323.349
46	18037.5	64538.3	48385.9	51301.3	46211.6	37878.9	32174.7	32436.8														46	180.375	645.383	483.859	513.013	462.116	378.789	321.747	324.368
47	18083.2	64958	48868.4	51786.8	46763.1	38059.3	32312	32380.5														47	180.832	649.58	488.684	517.868	467.631	380.593	323.12	323.805
48	17985	65549.8	49721.8	52198.6	46923.3	38318.2	32386.9	32420.3														48	179.85	655.498	497.218	521.986	469.233	383.182	323.869	324.203
49	18092	66107.7	50119.7	52708.9	47521.2	38441.8	32452.7	32432.2														49	180.92	661.077	501.197	527.089	475.212	384.418	324.527	324.322
50	18093.8	66645.4	50621.4	53000.6	47696.1	38631.4	32487.9	32473.6														50	180.938	666.454	506.214	530.006	476.961	386.314	324.879	324.736
51	17939.6	67146.3	51051.7	53498.9	47987.6	39078.4	32524.6	32601.2														51	179.396	671.463	510.517	534.989	479.876	390.784	325.246	326.012
52	18054.7	67760.1	51544.2	53969.8	48301.9	39198.2	32523.2	32614														52	180.547	677.601	515.442	539.698	483.019	391.982	325.232	326.14
53	17968.6	68336.4	51974.8	54273.7	48796.6	39400.2	32644.9	32729.1														53	179.686	683.364	519.748	542.737	487.966	394.002	326.449	327.291
54	18070.1	68799.8	52342.5	54792	49025.4	39665.8	32714.3	32747.2														54	180.701	687.998	523.425	547.92	490.254	396.658	327.143	327.472
55	18011.9	69414.2	52874.2	55213.5	49249.7	40014.8	32906.7	32774.9														55	180.119	694.142	528.742	552.135	492.497	400.148	329.067	327.749
56	18075.9	69823	53245.4	55574	49781.8	40220.6	32869.9	32992.6														56	180.759	698.23	532.454	555.74	497.818	402.206	328.699	329.926
57	18010.5	70220.9	53741.6	55928.9	50111.3	40455.9	32954.3	32888.6														57	180.105	702.209	537.416	559.289	501.113	404.559	329.543	328.886
58	18057.5	70798.9	54001.7	56366.9	50484.1	40637.9	33061.9	33015.4														58	180.575	707.989	540.017	563.669	504.841	406.379	330.619	330.154
59	17984.3	71306.8	54688.6	56934.4	50813.5	40915.8	33243.7	33116.8														59	179.843	713.068	546.886	569.344	508.135	409.158	332.437	331.168
60	17900.5	71942	54889.7	57243.3	51205.9	41058.4	33319.6	33077.9			11% PG (10uM DMPG+ 80uM DMPC)											60	179.005	719.42	548.897	572.433	512.059	410.584	333.196	330.779
61	17985.4	72291.7	55410.1	57621.4	51464	41358.6	33195.9	33102.6			[CACL2]=1.67mM; [DMPG]=10uM; [DMPC]=80uM; [DAPT]=15um; [G3P]= From 0 to 13.33mM											61	179.854	722.917	554.101	576.214	514.64	413.586	331.959	331.026
62	17993.4	72734.6	55932.6	58120.6	51761.5	41707.8	33373.6	33138.6														62	179.934	727.346	559.326	581.206	517.615	417.078	333.736	331.386
63	18002.9	73539.1	56289.7	58473.7	52278.8	41874.1	33533.1	33239.6														63	180.029	735.391	562.897	584.737	522.788	418.741	335.331	332.396
64	18011.1	73843.1	56580.9	58822.9	52394	42172.6	33469.8	33247.7														64	180.111	738.431	565.809	588.229	523.94	421.726	334.698	332.477
65	18047.2	74287.9	57066.6	59441.6	52989.7	42546.6	33556.1	33432.1														65	180.472	742.879	570.666	594.416	529.897	425.466	335.561	334.321
66	17976.1	74822.5	57671	59859.1	53366.5	42682.3	33578.2	33476.1														66	179.761	748.225	576.71	598.591	533.665	426.823	335.782	334.761
67	18008.9	75225.7	57978.5	60129.4	53808.2	42958.5	33519.1	33459.6														67	180.089	752.257	579.785	601.294	538.082	429.585	335.191	334.596
68	18023	75660.5	58517.4	60564.8	53986.6	43241.5	33599.4	33398														68	180.23	756.605	585.174	605.648	539.866	432.415	335.994	333.98
69	17979.4	76295.7	58759.8	61091.3	54255.8	43477	33725.4	33528.5														69	179.794	762.957	587.598	610.913	542.558	434.77	337.254	335.285
70	17917.4	76644.6	59306.1	61359.1	54784.4	43754.6	33903.5	33512.9														70	179.174	766.446	593.061	613.591	547.844	437.546	339.035	335.129
71	17969.8	77216.1	59590.1	61857.9	55142.8	44119.7	33967.4	33663.7														71	179.698	772.161	595.901	618.579	551.428	441.197	339.674	336.637
72	17995.6	77623.6	60076.7	62346.3	55477.7	44350.3	33927.2	33753.3														72	179.956	776.236	600.767	623.463	554.777	443.503	339.272	337.533
73	17973.2	77914.6	60659.5	62781.4	55969.5	44560	33932.6	33802.9														73	179.732	779.146	606.595	627.814	559.695	445.6	339.326	338.029
74	18007.8	78625.4	60843.2	63138.9	56167.3	44860	34183.5	33905.1														74	180.078	786.254	608.432	631.389	561.673	448.6	341.835	339.051
75	17904	78899.8	61295.3	63608.8	56543.3	45084.6	34288.2	33941.9														75	179.04	788.998	612.953	636.088	565.433	450.846	342.882	339.419
76	17981.8	79326.7	62244.5	63934.9	56905.8	45527.3	34275.6	33871.4														76	179.818	793.267	622.445	639.349	569.058	455.273	342.756	338.714
77	17946.7	79691.8	62526.5	64248.8	57342.6	45871.3	34413.2	34023.6														77	179.467	796.918	625.265	642.488	573.426	458.713	344.132	340.236
78	17840.7	80231.9	63026.5	64811.3	57619.1	46021.2	34515.3	34026.5														78	178.407	802.319	630.265	648.113	576.191	460.212	345.153	340.265
79	17930	80780.9	63439.4	65118.9	58055.4	46196.7	34551.1	34190.1														79	179.3	807.809	634.394	651.189	580.554	461.967	345.511	341.901
80	17859.1	81007.9	63798.9	65737.6	58250.7	46516.2	34638	34037.8														80	178.591	810.079	637.989	657.376	582.507	465.162	346.38	340.378
81	17874.3	81317.1	64405.9	65783.7	58667.8	46797.8	34785.8	34230.9														81	178.743	813.171	644.059	657.837	586.678	467.978	347.858	342.309
82	17917.8	81715.7	64730.2	66381.8	59130.6	47157.9	34849.3	34291.4														82	179.178	817.157	647.302	663.818	591.306	471.579	348.493	342.914
83	17839.3	82157.8	65007.4	66734.9	59298.1	47516.7	34798.8	34395.4														83	178.393	821.578	650.074	667.349	592.981	475.167	347.988	343.954
84	17916	82550.6	65410.1	67268.1	59618.6	47681.5	35031.8	34481.5														84	179.16	825.506	654.101	672.681	596.186	476.815	350.318	344.815
85	17789.4	82968.4	65818.6	67545.3	60081.3	47940.2	35092.8	34475.4														85	177.894	829.684	658.186	675.453	600.813	479.402	350.928	344.754
86	17916.9	83397.4	65969.3	67996	60460.3	48243.7	35149.7	34686.1														86	179.169	833.974	659.693	679.96	604.603	482.437	351.497	346.861
87	17844.4	83663.2	66486.3	68324.2	60842.2	48484.2	35156.8	34705.6														87	178.444	836.632	664.863	683.242	608.422	484.842	351.568	347.056
88	17889.9	84141.1	66956.3	68687.1	61042.7	48860.5	35315.7	34753.9														88	178.899	841.411	669.563	686.871	610.427	488.605	353.157	347.539
89	17842.8	84581.4	67249.4	69078.2	61563.5	49102.8	35276.7	35005														89	178.428	845.814	672.494	690.782	615.635	491.028	352.767	350.05
90	17785.2	85019.9	67587.7	69496.7	61825.8	49394	35397.8	34722.7														90	177.852	850.199	675.877	694.967	618.258	493.94	353.978	347.227
91	17851.8	85070.9	68280.9	70030.2	62391.5	49677.6	35493.7	34988.9														91	178.518	850.709	682.809	700.302	623.915	496.776	354.937	349.889
92	17870.2	85741.2	68588.3	70307.3	62633.3	50075.9	35459.2	34888.7														92	178.702	857.412	685.883	703.073	626.333	500.759	354.592	348.887
93	17865.6	85923.5	68883.8	70713.8	62920.2	50344.4	35597.1	35013.4														93	178.656	859.235	688.837	707.138	629.202	503.444	355.971	350.134
94	17918.7	86316.9	69336.9	71081.8	63258.1	50427.4	35701.8	35143.4														94	179.187	863.169	693.369	710.818	632.581	504.274	357.018	351.434
95	17880.2	86712.7	69723.4	71425.5	63539	50903.1	35910.3	35335.5														95	178.802	867.127	697.234	714.255	635.39	509.031	359.103	353.355
96	17862.4	87084.6	69935.6	71852	63728.3	51078.9	35890.8	35365.1														96	178.624	870.846	699.356	718.52	637.283	510.789	358.908	353.651
97	17821.1	87344.9	70352.4	72260.8	64272.3	51432.7	35856.5	35342.2														97	178.211	873.449	703.524	722.608	642.723	514.327	358.565	353.422
98	17829.2	87789.1	70616.4	72506.7	64441.3	51592.1	35971.5	35372														98	178.292	877.891	706.164	725.067	644.413	515.921	359.715	353.72
99	17900.6	88068.3	71010.6	72934.1	64729	51956.5	36178.1	35511.9														99	179.006	880.683	710.106	729.341	647.29	519.565	361.781	355.119
100	17876	88444.7	71348.6	73422.3	65214.8	52299.2	36227.2	35555.9														100	178.76	884.447	713.486	734.223	652.148	522.992	362.272	355.559
101	17859.6	88857	71791	73651.5	65346.6	52395	36243.6	35590.8														101	178.596	888.57	717.91	736.515	653.466	523.95	362.436	355.908
102	17874.3	89097.4	72095.9	74014.1	65904.8	52881.4	36301	35705														102	178.743	890.974	720.959	740.141	659.048	528.814	363.01	357.05
103	17823.4	89403.3	72254.2	74382.9	66261.2	53123.4	36470.8	35669.9														103	178.234	894.033	722.542	743.829	662.612	531.234	364.708	356.699
104	17955.6	89818.4	72914.1	74797	66382.6	53172.6	36489.6	35756.3														104	179.556	898.184	729.141	747.97	663.826	531.726	364.896	357.563
105	17900.6	89948.1	73266.1	74970	66853.5	53671.7	36594	35878														105	179.006	899.481	732.661	749.7	668.535	536.717	365.94	358.78
106	17827.8	90517.8	73490.2	75362.4	67286.5	53882	36544	35946.3														106	178.278	905.178	734.902	753.624	672.865	538.82	365.44	359.463
107	17877	90724.7	73693.5	75904	67361.2	54157.9	36773	36055.4														107	178.77	907.247	736.935	759.04	673.612	541.579	367.73	360.554
108	17784.4	90934.8	74463.8	76197.7	67885.7	54417.9	36954.5	36070.7														108	177.844	909.347	744.638	761.977	678.857	544.179	369.545	360.707
109	17823.8	91185.4	74558.1	76390.6	68301.1	54724.4	36960.6	36157.7														109	178.238	911.854	745.581	763.906	683.011	547.244	369.606	361.577
110	17877.1	91789.6	75087.2	76961.9	68466.2	55004.2	37001.1	36092														110	178.771	917.896	750.872	769.619	684.662	550.042	370.011	360.92
111	17841.5	91853	75391.8	77305.8	68754.5	55342.9	37084.5	36207														111	178.415	918.53	753.918	773.058	687.545	553.429	370.845	362.07
112	17814.5	92242.5	75813.6	77706	69209	55600.7	37289.5	36271.3														112	178.145	922.425	758.136	777.06	692.09	556.007	372.895	362.713
113	17804	92664	76069.3	78015	69398.9	55781.5	37257.1	36361.2														113	178.04	926.64	760.693	780.15	693.989	557.815	372.571	363.612
114	17876.1	92891.4	76644.5	78340.8	69671.7	55885.4	37315.8	36393.7														114	178.761	928.914	766.445	783.408	696.717	558.854	373.158	363.937
115	17725.6	93235.9	76687	78652.9	70053.2	56491	37465.1	36442														115	177.256	932.359	766.87	786.529	700.532	564.91	374.651	364.42
116	17847	93483.5	76956.9	78770.4	70258.1	56584	37513.1	36665.2														116	178.47	934.835	769.569	787.704	702.581	565.84	375.131	366.652
117	17757.1	93704.9	77510.3	79125.2	70447.4	56941.4	37585.8	36620.1														117	177.571	937.049	775.103	791.252	704.474	569.414	375.858	366.201
118	17834.3	94005.8	77746.4	79565.2	71025.2	57087.3	37672.2	36633.2														118	178.343	940.058	777.464	795.652	710.252	570.873	376.722	366.332
119	17871	94245.4	78110.5	79915.5	71279.9	57388.9	37884.2	36823.5														119	178.71	942.454	781.105	799.155	712.799	573.889	378.842	368.235
120	17765.3	94528.7	78140.1	80217.6	71480.1	57615.3	37847.7	36914														120	177.653	945.287	781.401	802.176	714.801	576.153	378.477	369.14
121	17739.4	94777.9	78601.8	80567.6	71711.7	57950	38045.7	36962.5														121	177.394	947.779	786.018	805.676	717.117	579.5	380.457	369.625
122	17782.5	95090.7	78843.6	80930.1	71943.9	58154.1	38010.5	37017.9														122	177.825	950.907	788.436	809.301	719.439	581.541	380.105	370.179
123	17745.9	95501.9	79178	81144.2	72394	58370.8	38159.4	37076.7														123	177.459	955.019	791.78	811.442	723.94	583.708	381.594	370.767
124	17795.7	95759.3	79609	81560.5	72720.3	58735.5	38194.8	37024.2														124	177.957	957.593	796.09	815.605	727.203	587.355	381.948	370.242
125	17733.8	95874	79700.6	81761.5	72952.7	58933.3	38369.2	37254.5														125	177.338	958.74	797.006	817.615	729.527	589.333	383.692	372.545
126	17811.2	96124	80198.3	82121.9	73168.4	59182.3	38341.7	37367.9														126	178.112	961.24	801.983	821.219	731.684	591.823	383.417	373.679
127	17800.9	96441.1	80381.6	82404.6	73596.8	59244.4	38466.6	37314														127	178.009	964.411	803.816	824.046	735.968	592.444	384.666	373.14
128	17736.2	96565	80763.7	82905.2	73638.4	59718.4	38457.2	37388.9														128	177.362	965.65	807.637	829.052	736.384	597.184	384.572	373.889
129	17839.6	96971.9	80670	82990.3	74026.6	60007.2	38650.4	37565.8														129	178.396	969.719	806.7	829.903	740.266	600.072	386.504	375.658
130	17821.5	97106.4	81376.7	83356.8	74523.6	60158.2	38703.3	37470.2														130	178.215	971.064	813.767	833.568	745.236	601.582	387.033	374.702
131	17781.6	97343.6	81640.6	83841.1	74694.2	60373	38855.8	37505.8														131	177.816	973.436	816.406	838.411	746.942	603.73	388.558	375.058
132	17811.1	97859.6	81923.5	83859.7	74824.6	60736.5	38928.3	37685.4														132	178.111	978.596	819.235	838.597	748.246	607.365	389.283	376.854
133	17832.1	98123	81913.7	84364	75156.5	60920.9	38935	37547.9														133	178.321	981.23	819.137	843.64	751.565	609.209	389.35	375.479
134	17789.8	98336.6	82467.9	84432.2	75476	61328.2	39226.7	37915.9														134	177.898	983.366	824.679	844.322	754.76	613.283	392.267	379.159
135	17806.7	98597.4	82848	84957.4	75765.2	61237.8	39083.8	37856.5														135	178.067	985.974	828.48	849.574	757.652	612.378	390.838	378.565
136	17852.2	98592.8	82957.2	85164.4	76118.6	61636.3	39167.4	37908.8														136	178.522	985.928	829.572	851.644	761.186	616.363	391.674	379.088
137	17846	98823.4	83399.6	85379	76267.5	61924.2	39443.1	38065.8														137	178.46	988.234	833.996	853.79	762.675	619.242	394.431	380.658
138	17770.7	99193.5	83359.8	85635.6	76421.5	62221.9	39347.1	38076														138	177.707	991.935	833.597	856.356	764.215	622.219	393.471	380.76
139	17778.9	99411.1	83868	86110.3	76878.7	62669.4	39458.1	38132.1														139	177.789	994.111	838.68	861.103	768.787	626.694	394.581	381.321
140	17787.1	99601.8	83846.4	86212.9	76936.9	62912.7	39631.5	38236.2														140	177.871	996.018	838.464	862.129	769.369	629.127	396.315	382.362
141	17766.8	99956	84092.7	86770.4	77132.7	63061.3	39653.2	38376.2														141	177.668	999.56	840.927	867.704	771.327	630.613	396.532	383.762
142	17783	100030	84403.2	86854.7	77397.4	63515.6	39653.6	38358.7														142	177.83	1000.3	844.032	868.547	773.974	635.156	396.536	383.587
143	17846	100391	84630.4	87235.5	77851.8	63659.4	39829.9	38396.9														143	178.46	1003.91	846.304	872.355	778.518	636.594	398.299	383.969
144	17719.8	100524	84904.6	87372.8	78077.1	63817	39945.4	38631.5														144	177.198	1005.24	849.046	873.728	780.771	638.17	399.454	386.315
145	17712.5	100968	85174.9	87698.2	78441.5	64066	40062.4	38581.3														145	177.125	1009.68	851.749	876.982	784.415	640.66	400.624	385.813
146	17776.6	100954	85506.8	87959.1	78672.9	64484.2	40091.5	38759.3														146	177.766	1009.54	855.068	879.591	786.729	644.842	400.915	387.593
147	17714.7	101388	85745.8	88183	78921.6	64732.7	40197.3	38763.9														147	177.147	1013.88	857.457	881.83	789.216	647.327	401.973	387.639
148	17773.3	101627	85983.1	88388.6	78973.6	64806.9	40272	38700.3														148	177.733	1016.27	859.831	883.886	789.736	648.069	402.72	387.003
149	17699.8	101606	86218.2	88777	79300.2	65231.2	40375.8	38883.8														149	176.998	1016.06	862.182	887.77	793.002	652.312	403.758	388.838
150	17698.9	101851	86253.3	89263.6	79506.5	65428.7	40440	38926.9														150	176.989	1018.51	862.533	892.636	795.065	654.287	404.4	389.269
151	17737.3	102171	86583.8	89209.1	80026	65568.7	40542.3	39064.4														151	177.373	1021.71	865.838	892.091	800.26	655.687	405.423	390.644
152	17823.9	102273	86948	89644.4	80067.5	65921.2	40656.8	39066.3														152	178.239	1022.73	869.48	896.444	800.675	659.212	406.568	390.663
153	17764.2	102641	87029.1	89784.8	80333.8	65857.1	40617.2	39222.5														153	177.642	1026.41	870.291	897.848	803.338	658.571	406.172	392.225
154	17728.8	102915	87434.4	90105.2	80700.5	66111.1	40893.1	39230.3														154	177.288	1029.15	874.344	901.052	807.005	661.111	408.931	392.303
155	17751.2	102990	87652	90337.1	80910	66205.5	40833.8	39412.9														155	177.512	1029.9	876.52	903.371	809.1	662.055	408.338	394.129
156	17772.5	103028	87712.8	90487.7	81211.7	66752.6	40970.7	39443.4														156	177.725	1030.28	877.128	904.877	812.117	667.526	409.707	394.434
157	17681.2	103197	87887.2	90913.5	81180.7	66693.5	41184.6	39569.4														157	176.812	1031.97	878.872	909.135	811.807	666.935	411.846	395.694
158	17776.4	103654	88420	91191.4	81730.9	67018.6	41249.4	39633.3														158	177.764	1036.54	884.2	911.914	817.309	670.186	412.494	396.333
159	17682.1	103763	88472.2	91361.9	81710.4	67207.5	41267.4	39684.2														159	176.821	1037.63	884.722	913.619	817.104	672.075	412.674	396.842
160	17715.5	103937	88673.1	91562.6	82165.9	67272.9	41339	39568.3														160	177.155	1039.37	886.731	915.626	821.659	672.729	413.39	395.683
161	17709.3	104139	88973.8	91836.5	82265.5	67589.9	41330.5	39779.3														161	177.093	1041.39	889.737	918.365	822.655	675.899	413.305	397.793
162	17750	104415	89151.1	92106.3	82509.7	67854.5	41426.4	39944.8														162	177.5	1044.15	891.511	921.063	825.097	678.545	414.264	399.448
163	17697.5	104749	89221.2	92301	82667.3	68119.1	41532.8	40017.7														163	176.975	1047.49	892.212	923.01	826.673	681.191	415.328	400.177
164	17766.4	104766	89567.8	92600	82892.7	68200.8	41577.2	40000.6														164	177.664	1047.66	895.678	926	828.927	682.008	415.772	400.006
165	17747.2	104971	89721.5	92803.8	83210.4	68646	41744.5	40121.8														165	177.472	1049.71	897.215	928.038	832.104	686.46	417.445	401.218
166	17781.9	105082	90009.4	92976.1	83493.9	68636.2	41926.9	40246.2														166	177.819	1050.82	900.094	929.761	834.939	686.362	419.269	402.462
167	17715.4	105383	90092.7	93162.3	83627.5	68807.4	41944.3	40251.6														167	177.154	1053.83	900.927	931.623	836.275	688.074	419.443	402.516
168	17714.3	105407	90349	93551.8	83673.2	69082.6	42010.5	40387.1														168	177.143	1054.07	903.49	935.518	836.732	690.826	420.105	403.871
169	17757.8	105566	90585.9	93734.5	84033	69400.5	42005.3	40402.3														169	177.578	1055.66	905.859	937.345	840.33	694.005	420.053	404.023
170	17704.9	105896	90627.4	93909.8	84262.3	69402.7	42152.2	40531.1														170	177.049	1058.96	906.274	939.098	842.623	694.027	421.522	405.311
171	17638.7	106033	91086.3	94127.2	84445.5	69766.2	42243.3	40679.7														171	176.387	1060.33	910.863	941.272	844.455	697.662	422.433	406.797
172	17652.3	106247	91060	94324.6	84610.3	69885.8	42343.4	40698.1														172	176.523	1062.47	910.6	943.246	846.103	698.857	423.434	406.981
173	17760.6	106542	91284.1	94527.8	84860.6	70107	42488.9	40612														173	177.606	1065.42	912.841	945.278	848.606	701.07	424.889	406.12
174	17746.7	106521	91570.7	94813.1	84854.3	70352.9	42572.4	40829.9														174	177.467	1065.21	915.707	948.131	848.543	703.529	425.724	408.299
175	17623.1	106682	91763.5	95037	85416.4	70462.2	42568.7	40994.9														175	176.231	1066.82	917.635	950.37	854.164	704.622	425.687	409.949
176	17772.1	106759	91621.6	95242	85441.8	70675.4	42647.2	40926.4														176	177.721	1067.59	916.216	952.42	854.418	706.754	426.472	409.264
177	17706.4	107042	92191.9	95510.5	85879.8	70878.2	42755.1	40978.4														177	177.064	1070.42	921.919	955.105	858.798	708.782	427.551	409.784
178	17640.2	107332	92231.3	95507.4	85853	71039	42884.8	41187														178	176.402	1073.32	922.313	955.074	858.53	710.39	428.848	411.87
179	17657	107350	92453.9	95781	86131.2	71262.4	42815.1	41199.7														179	176.57	1073.5	924.539	957.81	861.312	712.624	428.151	411.997
180	17737.9	107593	92490.5	95984.9	86395.8	71452.1	42971.4	41328.1														180	177.379	1075.93	924.905	959.849	863.957	714.521	429.714	413.281
181	17662.3	107841	92942	96339.9	86681.8	71624.1	43119	41447.1														181	176.623	1078.41	929.42	963.399	866.818	716.241	431.19	414.471
182	17676.8	107775	93040.2	96579.5	86815.9	71896.7	43148.8	41474.6														182	176.768	1077.75	930.402	965.795	868.159	718.967	431.488	414.746
183	17687.4	108167	93274.2	96437.5	87027.1	72034.3	43406	41482.1														183	176.874	1081.67	932.742	964.375	870.271	720.343	434.06	414.821
184	17750.3	108196	93399	97079	87169.4	72191.3	43426.8	41698														184	177.503	1081.96	933.99	970.79	871.694	721.913	434.268	416.98
185	17716.3	108419	93527.2	97232	87352.7	72297.9	43498.4	41762.3														185	177.163	1084.19	935.272	972.32	873.527	722.979	434.984	417.623
186	17669	108337	93765.1	97143	87409.5	72610.5	43612.4	41817.7														186	176.69	1083.37	937.651	971.43	874.095	726.105	436.124	418.177
187	17682.8	108714	93942.8	97553.1	87640.1	72766.3	43502.5	41834.3														187	176.828	1087.14	939.428	975.531	876.401	727.663	435.025	418.343
188	17659.4	108789	94037.3	97716.4	87799.3	72861.3	43671.3	42042.2														188	176.594	1087.89	940.373	977.164	877.993	728.613	436.713	420.422
189	17631.9	109196	94257	97792.3	88027.5	73094.3	43743.9	42143.3														189	176.319	1091.96	942.57	977.923	880.275	730.943	437.439	421.433
190	17732.9	109448	94293.1	97991.2	88405.1	73232.5	43792.3	42132.7														190	177.329	1094.48	942.931	979.912	884.051	732.325	437.923	421.327
191	17699.8	109380	94812.3	98237.6	88576.9	73403.6	44026.5	42258.7														191	176.998	1093.8	948.123	982.376	885.769	734.036	440.265	422.587
192	17736.2	109495	94837.6	98659.5	88682.8	73552.6	44098	42287.8														192	177.362	1094.95	948.376	986.595	886.828	735.526	440.98	422.878
193	17567	109725	94881.4	98754.7	89054.2	73814.6	44080.4	42371.9														193	175.67	1097.25	948.814	987.547	890.542	738.146	440.804	423.719
194	17715.1	109777	95152.3	98960.9	89009.2	73978.4	44221.6	42370.9														194	177.151	1097.77	951.523	989.609	890.092	739.784	442.216	423.709
195	17683.5	109974	95410.3	98948.4	89193.8	74109.9	44360.7	42587.4														195	176.835	1099.74	954.103	989.484	891.938	741.099	443.607	425.874
196	17772.7	110099	95541.3	99164	89286.7	74135.7	44428.9	42645.5														196	177.727	1100.99	955.413	991.64	892.867	741.357	444.289	426.455
197	17696.7	110203	95618.7	99442.2	89778	74408.6	44399.7	42756.5														197	176.967	1102.03	956.187	994.422	897.78	744.086	443.997	427.565
198	17720.4	110444	95709	99643.2	89739.4	74597.1	44516.2	42797.3														198	177.204	1104.44	957.09	996.432	897.394	745.971	445.162	427.973
199	17680.9	110545	95849.6	99872.9	89991.9	74991.4	44643.8	42934														199	176.809	1105.45	958.496	998.729	899.919	749.914	446.438	429.34
200	17631.3	110737	96153	100024	90183.5	75033.9	44707.2	42703.4														200	176.313	1107.37	961.53	1000.24	901.835	750.339	447.072	427.034
201	17661.9	110763	96120.4	100099	90192.9	75234.5	44838	42923.7														201	176.619	1107.63	961.204	1000.99	901.929	752.345	448.38	429.237
202	17651.8	110845	96460	100166	90435.9	75113.1	44899.6	43091.9														202	176.518	1108.45	964.6	1001.66	904.359	751.131	448.996	430.919
203	17724.2	111139	96555.5	100665	90637.4	75429.1	44866.9	43146.9														203	177.242	1111.39	965.555	1006.65	906.374	754.291	448.669	431.469
204	17652	111076	96662	100730	90767	75516.1	45002.7	43272.6														204	176.52	1110.76	966.62	1007.3	907.67	755.161	450.027	432.726
205	17656.3	111503	96893.4	100879	90860.3	75729.2	45119.1	43419.5														205	176.563	1115.03	968.934	1008.79	908.603	757.292	451.191	434.195
206	17668	111420	97137.4	100918	91167.1	75978	45271.2	43423.7														206	176.68	1114.2	971.374	1009.18	911.671	759.78	452.712	434.237
207	17608.3	111598	97229.4	101251	91345.2	76127.8	45295.4	43406.3														207	176.083	1115.98	972.294	1012.51	913.452	761.278	452.954	434.063
208	17657.4	112006	97063.8	101308	91638.7	76312.3	45316.8	43675														208	176.574	1120.06	970.638	1013.08	916.387	763.123	453.168	436.75
209	17634.4	111807	97479	101603	91715.9	76153.1	45246.6	43650.5														209	176.344	1118.07	974.79	1016.03	917.159	761.531	452.466	436.505
210	17662.3	111871	97766.2	101677	92023.2	76479.9	45393.8	43732.6														210	176.623	1118.71	977.662	1016.77	920.232	764.799	453.938	437.326
211	17616.6	112225	97821.7	102065	92007.1	76822.8	45597.5	43815.6														211	176.166	1122.25	978.217	1020.65	920.071	768.228	455.975	438.156
212	17590.2	112370	97972.6	102249	92167.4	76862.6	45612	44052														212	175.902	1123.7	979.726	1022.49	921.674	768.626	456.12	440.52
213	17690.5	112417	97901.8	102237	92375.7	76849.3	45793.5	44005.9														213	176.905	1124.17	979.018	1022.37	923.757	768.493	457.935	440.059
214	17662.4	112550	98143.2	102480	92383.4	77293	45829.5	44080.3														214	176.624	1125.5	981.432	1024.8	923.834	772.93	458.295	440.803
215	17615.5	112933	98379.2	102735	92734.5	77289.7	46010.6	44161.7														215	176.155	1129.33	983.792	1027.35	927.345	772.897	460.106	441.617
216	17711.1	112917	98479.5	102881	92715.7	77427	46059.1	44068.5														216	177.111	1129.17	984.795	1028.81	927.157	774.27	460.591	440.685
217	17600.5	112821	98710.2	102700	92913.9	77703.8	46071.9	44307.2														217	176.005	1128.21	987.102	1027	929.139	777.038	460.719	443.072
218	17600.1	113091	98688.5	103193	93245.2	77777.3	46347.6	44346.6														218	176.001	1130.91	986.885	1031.93	932.452	777.773	463.476	443.466
219	17687.7	113189	98903	103300	93448.6	77980.6	46404.5	44584.4														219	176.877	1131.89	989.03	1033	934.486	779.806	464.045	445.844
220	17522.7	113091	99014.4	103241	93407.2	78075.1	46383.4	44611.4														220	175.227	1130.91	990.144	1032.41	934.072	780.751	463.834	446.114
221	17590.1	113494	99114.5	103615	93586.9	78105	46501.7	44620.4														221	175.901	1134.94	991.145	1036.15	935.869	781.05	465.017	446.204
222	17593.6	113625	99317.3	103894	93688	78457.8	46581.6	44658.4														222	175.936	1136.25	993.173	1038.94	936.88	784.578	465.816	446.584
223	17541	113603	99555.8	104000	94074.4	78684.8	46655.1	44660.7														223	175.41	1136.03	995.558	1040	940.744	786.848	466.551	446.607
224	17658.6	113647	99530.5	104044	94170.6	78453	46622.8	44817.7														224	176.586	1136.47	995.305	1040.44	941.706	784.53	466.228	448.177
225	17678.5	113805	99805.5	104382	94204.5	78781	46714.6	44817.2														225	176.785	1138.05	998.055	1043.82	942.045	787.81	467.146	448.172
226	17636.5	113986	99697.4	104376	94407.2	79045.5	46840.3	45075.4														226	176.365	1139.86	996.974	1043.76	944.072	790.455	468.403	450.754
227	17666.6	114184	99929.3	104466	94409.4	79046.7	46990.8	45131.9														227	176.666	1141.84	999.293	1044.66	944.094	790.467	469.908	451.319
228	17667.3	114234	99814.5	104690	94742.2	79242.6	47114.7	45151														228	176.673	1142.34	998.145	1046.9	947.422	792.426	471.147	451.51
229	17710.2	114130	100183	104922	94648.1	79471.2	47052	45154.2														229	177.102	1141.3	1001.83	1049.22	946.481	794.712	470.52	451.542
230	17567.8	114367	100401	104970	94850.8	79398.1	47212.5	45385.2														230	175.678	1143.67	1004.01	1049.7	948.508	793.981	472.125	453.852
231	17630	114582	100271	105178	95146.9	79689	47294.8	45429.3														231	176.3	1145.82	1002.71	1051.78	951.469	796.89	472.948	454.293
232	17660.1	114684	100589	105270	95381.1	79982.9	47356.5	45421														232	176.601	1146.84	1005.89	1052.7	953.811	799.829	473.565	454.21
233	17580.5	114843	100482	105263	95529.8	79964.8	47413.8	45498.8														233	175.805	1148.43	1004.82	1052.63	955.298	799.648	474.137	454.988
234	17646.5	114750	100797	105649	95421	80123.1	47569.6	45605.5														234	176.465	1147.5	1007.97	1056.49	954.21	801.231	475.696	456.055
235	17603.2	114972	101043	105550	95756.8	80156	47682.2	45745.5														235	176.032	1149.72	1010.43	1055.5	957.567	801.56	476.822	457.455
236	17597.9	115151	100958	105624	95880.5	80325.9	47665.6	45877.2														236	175.979	1151.51	1009.58	1056.24	958.805	803.259	476.656	458.772
237	17607.1	115133	101178	105976	96069.5	80306.1	47729	45887.4														237	176.071	1151.33	1011.78	1059.76	960.695	803.061	477.29	458.874
238	17602	115322	100942	106101	96226	80526.5	47766.7	45890														238	176.02	1153.22	1009.42	1061.01	962.26	805.265	477.667	458.9
239	17666.3	115211	101625	106322	96397.5	80841.3	47805.3	46102.6														239	176.663	1152.11	1016.25	1063.22	963.975	808.413	478.053	461.026
240	17575	115442	101521	106440	96326.8	80722	47838	46060.8														240	175.75	1154.42	1015.21	1064.4	963.268	807.22	478.38	460.608
241	17575	115723	101538	106537	96675.8	80959.5	48187.4	46196.9														241	175.75	1157.23	1015.38	1065.37	966.758	809.595	481.874	461.969
242	17594	115613	101907	106453	96622.1	81107.1	48088.6	46245.8														242	175.94	1156.13	1019.07	1064.53	966.221	811.071	480.886	462.458
243	17630.2	115965	101908	106894	96871.3	81154.3	48218.4	46339.7														243	176.302	1159.65	1019.08	1068.94	968.713	811.543	482.184	463.397
244	17595.6	115768	101774	106981	96991.6	81293	48218.3	46461.9														244	175.956	1157.68	1017.74	1069.81	969.916	812.93	482.183	464.619
245	17633.4	116017	102064	107051	96977.6	81499.4	48368	46555.2														245	176.334	1160.17	1020.64	1070.51	969.776	814.994	483.68	465.552
246	17600.5	115867	102226	107249	97379.1	81527.5	48378	46671.7														246	176.005	1158.67	1022.26	1072.49	973.791	815.275	483.78	466.717
247	17642.7	116454	102314	107304	97359.9	81564.2	48463.1	46586.6														247	176.427	1164.54	1023.14	1073.04	973.599	815.642	484.631	465.866
248	17602	116397	102241	107355	97566.9	81804.5	48559.3	46591.2														248	176.02	1163.97	1022.41	1073.55	975.669	818.045	485.593	465.912
249	17595.9	116373	102543	107693	97775.7	82086.7	48630.3	46731.8														249	175.959	1163.73	1025.43	1076.93	977.757	820.867	486.303	467.318
250	17627	116226	102535	107806	97684.1	82091	48709.7	46755.7														250	176.27	1162.26	1025.35	1078.06	976.841	820.91	487.097	467.557
251	17628.1	116725	102606	108104	97927.3	82273.6	48723.7	46918.7														251	176.281	1167.25	1026.06	1081.04	979.273	822.736	487.237	469.187
252	17528.7	116566	102851	107957	97946.7	82355.4	48804.5	47122.8														252	175.287	1165.66	1028.51	1079.57	979.467	823.554	488.045	471.228
253	17650.2	116791	102875	108030	98286.9	82458.4	48933.4	47043.6														253	176.502	1167.91	1028.75	1080.3	982.869	824.584	489.334	470.436
254	17620.5	116978	102969	108309	98325.1	82511.3	48985.4	47196.1														254	176.205	1169.78	1029.69	1083.09	983.251	825.113	489.854	471.961
255	17512.9	116848	102775	108185	98438.6	82804.6	49116.4	47143.5														255	175.129	1168.48	1027.75	1081.85	984.386	828.046	491.164	471.435
256	17506.2	117195	103265	108398	98546.2	82800.7	49185.6	47355.4														256	175.062	1171.95	1032.65	1083.98	985.462	828.007	491.856	473.554
257	17605.5	116809	103313	108527	98873.5	82890.1	49352.3	47425.2														257	176.055	1168.09	1033.13	1085.27	988.735	828.901	493.523	474.252
258	17618.4	117266	103586	108770	98703.5	83001.9	49423.9	47450.1														258	176.184	1172.66	1035.86	1087.7	987.035	830.019	494.239	474.501
259	17569.4	117023	103570	108871	98908.7	83314.8	49515.3	47573.6														259	175.694	1170.23	1035.7	1088.71	989.087	833.148	495.153	475.736
260	17625.7	117264	103694	109088	99012.5	83384.6	49533.4	47625.2														260	176.257	1172.64	1036.94	1090.88	990.125	833.846	495.334	476.252
261	17577.4	117542	103644	109099	99281.9	83496.6	49596	47702.4														261	175.774	1175.42	1036.44	1090.99	992.819	834.966	495.96	477.024
262	17526.2	117721	103865	109208	99197.6	83599	49587.1	47739.1														262	175.262	1177.21	1038.65	1092.08	991.976	835.99	495.871	477.391
263	17562	117627	103864	109589	99316.3	83695.1	49701.7	47823.9														263	175.62	1176.27	1038.64	1095.89	993.163	836.951	497.017	478.239
264	17595.4	117928	104109	109428	99688	83860.2	49793.9	47914.6														264	175.954	1179.28	1041.09	1094.28	996.88	838.602	497.939	479.146
265	17477.9	117890	104145	109593	99604.9	84069.1	49808.9	47911.4														265	174.779	1178.9	1041.45	1095.93	996.049	840.691	498.089	479.114
266	17497.6	117988	104343	109623	99764.5	84193.8	49818.2	47918.9														266	174.976	1179.88	1043.43	1096.23	997.645	841.938	498.182	479.189
267	17602.2	117928	104440	109894	99723.5	84084.9	49931.2	48002														267	176.022	1179.28	1044.4	1098.94	997.235	840.849	499.312	480.02
268	17531.4	118198	104230	109862	100067	84169.2	50095.6	48100.4														268	175.314	1181.98	1042.3	1098.62	1000.67	841.692	500.956	481.004
269	17652.8	118259	104569	109958	99993.5	84203.3	50188.3	48241.1														269	176.528	1182.59	1045.69	1099.59	999.935	842.033	501.883	482.411
270	17605.1	118257	104459	110033	100312	84399.9	50182.9	48187.3														270	176.051	1182.57	1044.59	1100.33	1003.12	843.999	501.829	481.873
271	17560.5	118364	104593	110317	100313	84527.2	50301.3	48499														271	175.605	1183.64	1045.93	1103.17	1003.13	845.272	503.013	484.99
272	17548.2	118391	104682	110613	100358	84786.4	50397.1	48356.1														272	175.482	1183.91	1046.82	1106.13	1003.58	847.864	503.971	483.561
273	17592.3	118354	104621	110404	100695	84894.1	50564.7	48541.8														273	175.923	1183.54	1046.21	1104.04	1006.95	848.941	505.647	485.418
274	17549.6	118540	104626	110485	100495	84971.8	50548.4	48644.7														274	175.496	1185.4	1046.26	1104.85	1004.95	849.718	505.484	486.447
275	17581.6	118557	104878	110535	100739	85103.2	50611.2	48691.6														275	175.816	1185.57	1048.78	1105.35	1007.39	851.032	506.112	486.916
276	17564	118748	104951	110844	100936	85273.6	50569.5	48838.9														276	175.64	1187.48	1049.51	1108.44	1009.36	852.736	505.695	488.389
277	17480.1	118746	105222	111075	101202	85172.4	50789.1	48929.2														277	174.801	1187.46	1052.22	1110.75	1012.02	851.724	507.891	489.292
278	17559.2	118820	105205	111092	101252	85343.9	50779.9	48829.4														278	175.592	1188.2	1052.05	1110.92	1012.52	853.439	507.799	488.294
279	17518.2	118919	105439	111050	101215	85353.1	50746.9	48892														279	175.183	1189.19	1054.39	1110.5	1012.15	853.531	507.469	488.92
280	17520.8	119029	105355	111036	101273	85409.1	51046.2	49032.9														280	175.208	1190.29	1053.55	1110.36	1012.73	854.091	510.462	490.329
281	17540.6	118831	105493	111541	101360	85539.4	51068.8	49093.3														281	175.406	1188.31	1054.93	1115.41	1013.6	855.394	510.688	490.933
282	17622.5	119013	105674	111628	101493	85777.4	51027.1	49158.7														282	176.225	1190.13	1056.74	1116.28	1014.93	857.774	510.271	491.587
283	17519.4	119160	105627	111533	101724	85842.9	51139.9	49262.4														283	175.194	1191.6	1056.27	1115.33	1017.24	858.429	511.399	492.624
284	17477.7	119336	105776	111646	101609	85937.1	51324.7	49321.5														284	174.777	1193.36	1057.76	1116.46	1016.09	859.371	513.247	493.215
285	17565.6	119610	105657	111816	101871	86017.9	51266.7	49500.3														285	175.656	1196.1	1056.57	1118.16	1018.71	860.179	512.667	495.003
286	17545.1	119379	105806	111905	102065	86056.6	51576.3	49553.5														286	175.451	1193.79	1058.06	1119.05	1020.65	860.566	515.763	495.535
287	17629.1	119785	105970	112073	102119	86347.7	51390.9	49390														287	176.291	1197.85	1059.7	1120.73	1021.19	863.477	513.909	493.9
288	17556.2	119434	106022	112134	102170	86407.9	51641.9	49738.5														288	175.562	1194.34	1060.22	1121.34	1021.7	864.079	516.419	497.385
289	17620.8	119813	105993	112221	102388	86456.6	51658	49808.6														289	176.208	1198.13	1059.93	1122.21	1023.88	864.566	516.58	498.086
290	17631.2	119703	106123	112262	102360	86440.3	51668.6	49784.3														290	176.312	1197.03	1061.23	1122.62	1023.6	864.403	516.686	497.843
291	17557.9	119957	106137	112486	102575	86407.7	51790	49734.7														291	175.579	1199.57	1061.37	1124.86	1025.75	864.077	517.9	497.347
292	17624.9	119815	106340	112531	102702	86625.6	51797.9	49799.7														292	176.249	1198.15	1063.4	1125.31	1027.02	866.256	517.979	497.997
293	17571.4	119987	106358	112737	102624	86779.3	51953.4	49933.4														293	175.714	1199.87	1063.58	1127.37	1026.24	867.793	519.534	499.334
294	17522.2	120019	106358	112668	102901	86790	51923.1	49986														294	175.222	1200.19	1063.58	1126.68	1029.01	867.9	519.231	499.86
295	17516.8	119942	106331	112880	102873	86927.9	52062.7	50095.4														295	175.168	1199.42	1063.31	1128.8	1028.73	869.279	520.627	500.954
296	17601.5	120168	106737	112798	102907	87279.8	52001	50226.4														296	176.015	1201.68	1067.37	1127.98	1029.07	872.798	520.01	502.264
297	17607.3	120098	106632	112847	103374	87208	52113.4	50199.2														297	176.073	1200.98	1066.32	1128.47	1033.74	872.08	521.134	501.992
298	17558.4	120223	106731	113199	103132	87351.1	52342.9	50312.3														298	175.584	1202.23	1067.31	1131.99	1031.32	873.511	523.429	503.123
299	17446.2	120434	106993	113251	103143	87378.7	52261.8	50320.6														299	174.462	1204.34	1069.93	1132.51	1031.43	873.787	522.618	503.206
300	17528.5	120438	107045	113429	103382	87553.7	52446.1	50353.9														300	175.285	1204.38	1070.45	1134.29	1033.82	875.537	524.461	503.539
301	17569.4	120624	107001	113476	103497	87502.6	52386.6	50442														301	175.694	1206.24	1070.01	1134.76	1034.97	875.026	523.866	504.42
302	17449	120428	107170	113313	103839	87371.9	52610.8	50612.2														302	174.49	1204.28	1071.7	1133.13	1038.39	873.719	526.108	506.122
303	17519.7	120809	107357	113505	103674	87757.1	52547.8	50804														303	175.197	1208.09	1073.57	1135.05	1036.74	877.571	525.478	508.04
304	17566.6	120556	107282	113551	103929	87800.7	52619.9	50664.2														304	175.666	1205.56	1072.82	1135.51	1039.29	878.007	526.199	506.642
305	17584.3	120902	107422	113564	103992	87911.6	52609.4	50883.1														305	175.843	1209.02	1074.22	1135.64	1039.92	879.116	526.094	508.831
306	17575.4	120708	107377	113701	104112	87980.6	52773.6	50798														306	175.754	1207.08	1073.77	1137.01	1041.12	879.806	527.736	507.98
307	17515.1	120621	107580	114053	103923	88118.2	52856.3	50884														307	175.151	1206.21	1075.8	1140.53	1039.23	881.182	528.563	508.84
308	17546.2	120730	107383	114132	104299	88207.4	52876.6	51010.5														308	175.462	1207.3	1073.83	1141.32	1042.99	882.074	528.766	510.105
309	17480.4	120860	107640	113938	104328	88197.8	53033.2	50942.6														309	174.804	1208.6	1076.4	1139.38	1043.28	881.977	530.332	509.426
310	17536.3	121119	107692	114299	104386	88334.2	52915.8	50880.7														310	175.363	1211.19	1076.92	1142.99	1043.86	883.342	529.158	508.807
311	17485.4	121021	107905	114424	104255	88567	53084.4	51166.3														311	174.854	1210.21	1079.05	1144.24	1042.55	885.67	530.844	511.663
312	17486.8	121048	107853	114507	104558	88689.8	53244.7	51243.2														312	174.868	1210.48	1078.53	1145.07	1045.58	886.898	532.447	512.432
313	17543.2	120984	107833	114533	104823	88509	53249.5	51203.2														313	175.432	1209.84	1078.33	1145.33	1048.23	885.09	532.495	512.032
314	17608.8	121542	107683	114747	104663	88676.8	53296.7	51468.7														314	176.088	1215.42	1076.83	1147.47	1046.63	886.768	532.967	514.687
315	17515.7	121382	107761	114732	104805	88895.6	53253.2	51462														315	175.157	1213.82	1077.61	1147.32	1048.05	888.956	532.532	514.62
316	17562.7	121448	108006	114868	104905	89037	53528.6	51460.9														316	175.627	1214.48	1080.06	1148.68	1049.05	890.37	535.286	514.609
317	17466	121286	108062	114778	104998	88907.9	53419.5	51601.4														317	174.66	1212.86	1080.62	1147.78	1049.98	889.079	534.195	516.014
318	17545.2	121517	108141	115143	104924	89162.4	53532.5	51724.2														318	175.452	1215.17	1081.41	1151.43	1049.24	891.624	535.325	517.242
319	17533	121657	108245	114925	104883	89031.1	53581	51635.8														319	175.33	1216.57	1082.45	1149.25	1048.83	890.311	535.81	516.358
320	17464.2	121766	108046	114993	105271	88987.4	53686.7	51808.6														320	174.642	1217.66	1080.46	1149.93	1052.71	889.874	536.867	518.086
321	17483.9	121536	108346	115074	105289	89233.5	53623.4	51884.1														321	174.839	1215.36	1083.46	1150.74	1052.89	892.335	536.234	518.841
322	17522.2	121572	108421	115248	105345	89448.4	53792.7	51808														322	175.222	1215.72	1084.21	1152.48	1053.45	894.484	537.927	518.08
323	17533.4	121691	108239	115340	105398	89382.7	53962.4	51938.1														323	175.334	1216.91	1082.39	1153.4	1053.98	893.827	539.624	519.381
324	17509	121715	108450	115536	105670	89591.7	54075.3	51994.5														324	175.09	1217.15	1084.5	1155.36	1056.7	895.917	540.753	519.945
325	17564.8	121781	108415	115523	105567	89495.3	53887.5	52115.1														325	175.648	1217.81	1084.15	1155.23	1055.67	894.953	538.875	521.151
326	17568.5	121882	108640	115521	105756	89686.5	54034.2	52216.2														326	175.685	1218.82	1086.4	1155.21	1057.56	896.865	540.342	522.162
327	17524	121791	108801	115460	105833	89827.2	54060.3	52181.7														327	175.24	1217.91	1088.01	1154.6	1058.33	898.272	540.603	521.817
328	17591.6	122045	108597	115665	105982	89779	54273.4	52297.1														328	175.916	1220.45	1085.97	1156.65	1059.82	897.79	542.734	522.971
329	17521.2	122139	108533	115696	105948	90097.2	54414.8	52426.4														329	175.212	1221.39	1085.33	1156.96	1059.48	900.972	544.148	524.264
330	17483.6	122248	108720	115822	105835	90134.9	54234.1	52470.2														330	174.836	1222.48	1087.2	1158.21	1058.35	901.349	542.341	524.702
331	17474	122134	108718	116034	106068	89958.1	54347.5	52425.1														331	174.74	1221.34	1087.18	1160.34	1060.68	899.581	543.475	524.251
332	17520	122251	108842	116032	106010	90035.4	54640.6	52622.8														332	175.2	1222.51	1088.42	1160.32	1060.1	900.354	546.406	526.228
333	17467.3	122324	108917	116151	106212	90118.5	54442.2	52479.6														333	174.673	1223.24	1089.17	1161.51	1062.12	901.185	544.422	524.796
334	17483.7	122538	108980	116188	106221	90200.2	54477.1	52697.2														334	174.837	1225.38	1089.8	1161.88	1062.21	902.002	544.771	526.972
335	17479.2	122356	109036	116261	106691	90536.2	54566.6	52857.6														335	174.792	1223.56	1090.36	1162.61	1066.91	905.362	545.666	528.576
336	17566.1	122481	109287	116398	106506	90423	54786	52717.9														336	175.661	1224.81	1092.87	1163.98	1065.06	904.23	547.86	527.179
337	17498.1	122440	109293	116438	106597	90547.7	54757.7	52784.7														337	174.981	1224.4	1092.93	1164.38	1065.97	905.477	547.577	527.847
338	17635.5	122662	109087	116640	106699	90586.4	54793.9	52978.5														338	176.355	1226.62	1090.87	1166.4	1066.99	905.864	547.939	529.785
339	17496.3	122456	109267	116640	106730	90509.9	54778.4	52996.8														339	174.963	1224.56	1092.67	1166.4	1067.3	905.099	547.784	529.968
340	17525.6	122671	109431	116596	106775	90652.8	55023.4	52975.2														340	175.256	1226.71	1094.31	1165.96	1067.75	906.528	550.234	529.752
341	17554.1	122676	109228	116772	106886	90885	54897.3	53133.5														341	175.541	1226.76	1092.28	1167.72	1068.86	908.85	548.973	531.335
342	17446	122739	109494	116803	106954	90991.3	55214.7	53222.4														342	174.46	1227.39	1094.94	1168.03	1069.54	909.913	552.147	532.224
343	17546.3	122740	109432	116634	106798	90908.1	55179.2	53141.3														343	175.463	1227.4	1094.32	1166.34	1067.98	909.081	551.792	531.413
344	17450.8	122710	109400	116797	107141	90993.3	55119.8	53419.5														344	174.508	1227.1	1094	1167.97	1071.41	909.933	551.198	534.195
345	17506.5	123062	109727	116960	107315	91133.4	55374.2	53266.2														345	175.065	1230.62	1097.27	1169.6	1073.15	911.334	553.742	532.662
346	17545.2	122780	109621	117125	107350	91270.5	55431.3	53370.3														346	175.452	1227.8	1096.21	1171.25	1073.5	912.705	554.313	533.703
347	17538.2	122961	109585	117167	107370	91366.6	55391	53571.9														347	175.382	1229.61	1095.85	1171.67	1073.7	913.666	553.91	535.719
348	17530.3	123042	109778	116974	107431	91527.9	55248.5	53662.3														348	175.303	1230.42	1097.78	1169.73	1074.31	915.279	552.485	536.623
349	17484.9	123315	109660	117168	107422	91351.6	55579.2	53596														349	174.849	1233.15	1096.6	1171.68	1074.22	913.516	555.792	535.96
350	17394.5	123439	109781	117305	107528	91356.1	55615.9	53712.5														350	173.945	1234.39	1097.81	1173.05	1075.28	913.561	556.159	537.125
351	17440.6	123367	109798	117250	107495	91366.5	55721.3	53641.3														351	174.406	1233.67	1097.98	1172.5	1074.95	913.665	557.213	536.413
352	17479.5	123384	109904	117458	107756	91610.5	55677.6	53810.1														352	174.795	1233.84	1099.04	1174.58	1077.56	916.105	556.776	538.101
353	17447.3	123059	109873	117774	107659	91637.5	55803.2	53959.3														353	174.473	1230.59	1098.73	1177.74	1076.59	916.375	558.032	539.593
354	17583.7	123463	110081	117491	107730	91810.3	55833.4	54146.5														354	175.837	1234.63	1100.81	1174.91	1077.3	918.103	558.334	541.465
355	17455.9	123480	110029	117557	107977	91704.9	55933	54043.3														355	174.559	1234.8	1100.29	1175.57	1079.77	917.049	559.33	540.433
356	17500.1	123820	110162	117524	107933	91956.5	56063.9	54048.6														356	175.001	1238.2	1101.62	1175.24	1079.33	919.565	560.639	540.486
357	17460.6	123435	110237	117805	107964	91989.4	56104.8	54173.9														357	174.606	1234.35	1102.37	1178.05	1079.64	919.894	561.048	541.739
358	17449	123723	110141	117884	108055	92177.1	55959.8	54219														358	174.49	1237.23	1101.41	1178.84	1080.55	921.771	559.598	542.19
359	17566.6	123376	110189	117748	108165	92118.9	56118.9	54128.7														359	175.666	1233.76	1101.89	1177.48	1081.65	921.189	561.189	541.287
360	17485.1	123503	110393	117868	108141	92168.1	56136.7	54302.2														360	174.851	1235.03	1103.93	1178.68	1081.41	921.681	561.367	543.022
361	17576.2	123525	110279	117904	108312	92241	56305	54403.2														361	175.762	1235.25	1102.79	1179.04	1083.12	922.41	563.05	544.032
362	17492.3	123897	110382	118059	108382	92377.5	56308.1	54455.9														362	174.923	1238.97	1103.82	1180.59	1083.82	923.775	563.081	544.559
363	17565.4	123639	110439	118240	108467	92404.9	56347.3	54542.9														363	175.654	1236.39	1104.39	1182.4	1084.67	924.049	563.473	545.429
364	17542.6	124012	110476	118240	108487	92452.7	56247.8	54487.5														364	175.426	1240.12	1104.76	1182.4	1084.87	924.527	562.478	544.875
365	17573.9	123987	110521	118193	108499	92489.2	56503.2	54595.1														365	175.739	1239.87	1105.21	1181.93	1084.99	924.892	565.032	545.951
366	17533.5	123798	110722	118046	108487	92872	56400.5	54745														366	175.335	1237.98	1107.22	1180.46	1084.87	928.72	564.005	547.45
367	17488.4	124009	110659	118147	108706	92781.2	56584.4	54683.8														367	174.884	1240.09	1106.59	1181.47	1087.06	927.812	565.844	546.838
368	17499.7	123742	110498	118558	108713	92907.7	56637.7	54997.4														368	174.997	1237.42	1104.98	1185.58	1087.13	929.077	566.377	549.974
369	17546.7	124160	110705	118533	108666	92804.6	56657.3	54922.8														369	175.467	1241.6	1107.05	1185.33	1086.66	928.046	566.573	549.228
370	17519.4	124117	110625	118498	109034	93016.1	56805.9	54879.5														370	175.194	1241.17	1106.25	1184.98	1090.34	930.161	568.059	548.795
371	17542.4	123971	110622	118636	109159	93061.4	56823.5	54919.9														371	175.424	1239.71	1106.22	1186.36	1091.59	930.614	568.235	549.199
372	17529	123989	110733	118680	108909	92878.5	57052.5	55213.2														372	175.29	1239.89	1107.33	1186.8	1089.09	928.785	570.525	552.132
373	17572.3	124052	110858	118716	109277	92886	57049.4	55150.9														373	175.723	1240.52	1108.58	1187.16	1092.77	928.86	570.494	551.509
374	17409.3	124268	110868	118841	109170	93077.3	57020.5	55170														374	174.093	1242.68	1108.68	1188.41	1091.7	930.773	570.205	551.7
375	17496.4	124100	110942	118838	109183	93252.2	57043.1	55141.8														375	174.964	1241	1109.42	1188.38	1091.83	932.522	570.431	551.418
376	17549.6	124207	110889	118849	109267	93205.7	57181.1	55373.7														376	175.496	1242.07	1108.89	1188.49	1092.67	932.057	571.811	553.737
377	17541.2	124094	110923	119055	109218	93305.3	57227.6	55228.6														377	175.412	1240.94	1109.23	1190.55	1092.18	933.053	572.276	552.286
378	17516.1	124395	110948	118892	109434	93379.3	57260	55366.9														378	175.161	1243.95	1109.48	1188.92	1094.34	933.793	572.6	553.669
379	17520.7	124355	111189	119029	109450	93411.1	57297.6	55393.8														379	175.207	1243.55	1111.89	1190.29	1094.5	934.111	572.976	553.938
380	17518	124202	110889	119249	109472	93542.8	57323.5	55500.7														380	175.18	1242.02	1108.89	1192.49	1094.72	935.428	573.235	555.007
381	17489	124289	111091	119120	109432	93455.3	57268.4	55619.6														381	174.89	1242.89	1110.91	1191.2	1094.32	934.553	572.684	556.196
382	17483.5	124488	111234	119363	109539	93482.5	57484.4	55686.7														382	174.835	1244.88	1112.34	1193.63	1095.39	934.825	574.844	556.867
383	17505.7	124323	110908	119281	109633	93651.6	57602.2	55583.4														383	175.057	1243.23	1109.08	1192.81	1096.33	936.516	576.022	555.834
384	17507.3	124527	111257	119475	109668	93827.7	57689.3	55793.5														384	175.073	1245.27	1112.57	1194.75	1096.68	938.277	576.893	557.935
385	17461.5	124384	111200	119489	109860	93767.7	57393	55737.6														385	174.615	1243.84	1112	1194.89	1098.6	937.677	573.93	557.376
386	17435.3	124520	111187	119485	109945	93682.3	57856.6	55953.3														386	174.353	1245.2	1111.87	1194.85	1099.45	936.823	578.566	559.533
387	17496.7	124865	111234	119564	109889	93918	57731.6	56012.1														387	174.967	1248.65	1112.34	1195.64	1098.89	939.18	577.316	560.121
388	17531.9	124661	111349	119452	110011	93837.7	57840.5	55991.3														388	175.319	1246.61	1113.49	1194.52	1100.11	938.377	578.405	559.913
389	17498.7	124805	111490	119540	110119	93879	57817.3	56076.2														389	174.987	1248.05	1114.9	1195.4	1101.19	938.79	578.173	560.762
390	17441.6	124807	111526	119606	110115	93982.3	57920.9	56025.5														390	174.416	1248.07	1115.26	1196.06	1101.15	939.823	579.209	560.255
391	17580.6	124820	111581	119928	110053	94116.1	57979	56248.9														391	175.806	1248.2	1115.81	1199.28	1100.53	941.161	579.79	562.489
392	17500.9	124732	111531	119632	110049	94316	57980.2	56265.8														392	175.009	1247.32	1115.31	1196.32	1100.49	943.16	579.802	562.658
393	17366.6	124603	111554	119878	110219	94237.5	58095.2	56246.5														393	173.666	1246.03	1115.54	1198.78	1102.19	942.375	580.952	562.465
394	17433.1	124936	111459	120005	110541	94264.4	58062.9	56292.5														394	174.331	1249.36	1114.59	1200.05	1105.41	942.644	580.629	562.925
395	17578.8	124755	111445	119928	110572	94303.7	58170.8	56304.1														395	175.788	1247.55	1114.45	1199.28	1105.72	943.037	581.708	563.041
396	17463.2	124721	111755	120055	110597	94685.5	58237.3	56413														396	174.632	1247.21	1117.55	1200.55	1105.97	946.855	582.373	564.13
397	17454.5	125045	111620	119972	110525	94599.5	58376.3	56593.9														397	174.545	1250.45	1116.2	1199.72	1105.25	945.995	583.763	565.939
398	17471.6	124706	111570	120178	110563	94686	58420.7	56568.1														398	174.716	1247.06	1115.7	1201.78	1105.63	946.86	584.207	565.681
399	17411	124764	111608	120052	110660	94756	58339.8	56505.1														399	174.11	1247.64	1116.08	1200.52	1106.6	947.56	583.398	565.051
400	17403.3	125257	111683	119961	110540	94651.7	58395.1	56555.3														400	174.033	1252.57	1116.83	1199.61	1105.4	946.517	583.951	565.553
401	17439.1	125042	111732	120029	110870	94836.8	58545.3	56814.5														401	174.391	1250.42	1117.32	1200.29	1108.7	948.368	585.453	568.145
402	17406.8	124747	111779	120119	110943	94389.1	58623.6	56695.7														402	174.068	1247.47	1117.79	1201.19	1109.43	943.891	586.236	566.957
403	17617.6	125102	111726	120203	110733	94770	58540.7	56876.3														403	176.176	1251.02	1117.26	1202.03	1107.33	947.7	585.407	568.763
404	17550.2	125158	111873	120165	110999	94825.1	58747.6	56906.7														404	175.502	1251.58	1118.73	1201.65	1109.99	948.251	587.476	569.067
405	17509	125092	111850	120525	111024	94967.5	58728.5	56823.9														405	175.09	1250.92	1118.5	1205.25	1110.24	949.675	587.285	568.239
406	17472.7	125077	111935	120551	110881	95040.1	58825	56896.5														406	174.727	1250.77	1119.35	1205.51	1108.81	950.401	588.25	568.965
407	17419.1	125130	112091	120378	111048	95078.7	58912.3	56998.4														407	174.191	1251.3	1120.91	1203.78	1110.48	950.787	589.123	569.984
408	17457.6	125351	111930	120501	111143	95028	58930.3	57234														408	174.576	1253.51	1119.3	1205.01	1111.43	950.28	589.303	572.34
409	17445.7	125165	112083	120604	111151	95143.3	58953.5	57221.6														409	174.457	1251.65	1120.83	1206.04	1111.51	951.433	589.535	572.216
410	17526.7	125273	111866	120530	111242	95249.3	58959.6	57008.4														410	175.267	1252.73	1118.66	1205.3	1112.42	952.493	589.596	570.084
411	17422.2	125125	112206	120712	111289	95309.6	59212.5	57338.9														411	174.222	1251.25	1122.06	1207.12	1112.89	953.096	592.125	573.389
412	17562.7	125339	111921	120641	111383	95262.7	59006	57335.9														412	175.627	1253.39	1119.21	1206.41	1113.83	952.627	590.06	573.359
413	17477.3	125105	112187	120800	111400	95463	59194.4	57364.4														413	174.773	1251.05	1121.87	1208	1114	954.63	591.944	573.644
414	17465.2	125374	112184	120885	111385	95456.9	59006.6	57640.7														414	174.652	1253.74	1121.84	1208.85	1113.85	954.569	590.066	576.407
415	17446	125397	112055	120663	111445	95497.4	59277.2	57444.8														415	174.46	1253.97	1120.55	1206.63	1114.45	954.974	592.772	574.448
416	17520.6	125161	112344	120817	111424	95596.9	59318.5	57529.6														416	175.206	1251.61	1123.44	1208.17	1114.24	955.969	593.185	575.296
417	17419.5	125374	112217	120910	111518	95320.3	59409	57672														417	174.195	1253.74	1122.17	1209.1	1115.18	953.203	594.09	576.72
418	17582.1	125537	112344	120946	111549	95516.4	59455.5	57727														418	175.821	1255.37	1123.44	1209.46	1115.49	955.164	594.555	577.27
419	17489	125557	112298	121143	111499	95785.8	59581	57712.9														419	174.89	1255.57	1122.98	1211.43	1114.99	957.858	595.81	577.129
420	17379.1	125554	112237	121005	111637	95588.2	59506.2	57756.9														420	173.791	1255.54	1122.37	1210.05	1116.37	955.882	595.062	577.569
421	17346.9	125604	112278	121122	111741	95818.2	59497.1	58101.1														421	173.469	1256.04	1122.78	1211.22	1117.41	958.182	594.971	581.011
422	17417.5	125472	112255	121020	111863	95893.1	59645	57857.6														422	174.175	1254.72	1122.55	1210.2	1118.63	958.931	596.45	578.576
423	17361.5	125719	112350	121262	111971	96018.7	59761.4	57904.1														423	173.615	1257.19	1123.5	1212.62	1119.71	960.187	597.614	579.041
424	17471.4	125507	112434	121382	111868	95825.2	59812.4	57893.8														424	174.714	1255.07	1124.34	1213.82	1118.68	958.252	598.124	578.938
425	17466.7	125626	112260	121019	111697	95940.2	59894.1	57958.1														425	174.667	1256.26	1122.6	1210.19	1116.97	959.402	598.941	579.581
426	17378.1	125598	112528	121187	111851	96320.5	59652.5	58049.3														426	173.781	1255.98	1125.28	1211.87	1118.51	963.205	596.525	580.493
427	17399.3	125496	112448	121456	112037	95998.8	59911.3	58066.6														427	173.993	1254.96	1124.48	1214.56	1120.37	959.988	599.113	580.666
428	17540.5	125855	112514	121174	111971	96045.4	59963.5	58265.8														428	175.405	1258.55	1125.14	1211.74	1119.71	960.454	599.635	582.658
429	17394.7	125739	112489	121481	112132	96322.2	59944.9	58420.6														429	173.947	1257.39	1124.89	1214.81	1121.32	963.222	599.449	584.206
430	17560.6	125702	112460	121301	111989	96325	60084	58405.8														430	175.606	1257.02	1124.6	1213.01	1119.89	963.25	600.84	584.058
431	17385.9	125836	112256	121488	112317	96291.2	60085.5	58350.5														431	173.859	1258.36	1122.56	1214.88	1123.17	962.912	600.855	583.505
432	17397.7	125714	112657	121522	112091	96331.3	60224.2	58526.9														432	173.977	1257.14	1126.57	1215.22	1120.91	963.313	602.242	585.269
433	17452.6	125634	112565	121636	112414	96394.8	60204.6	58452.3														433	174.526	1256.34	1125.65	1216.36	1124.13	963.947	602.046	584.523
434	17473.8	125863	112685	121419	112302	96568.8	60306.6	58467.8														434	174.738	1258.63	1126.85	1214.19	1123.02	965.688	603.066	584.678
435	17479.8	125835	112771	121473	112315	96473.7	60228.2	58682.2														435	174.798	1258.35	1127.71	1214.73	1123.15	964.737	602.282	586.822
436	17566.6	126062	112624	121810	112349	96607.8	60298.7	58629.7														436	175.666	1260.62	1126.24	1218.1	1123.49	966.078	602.987	586.297
437	17519.3	125770	112973	121691	112497	96426.6	60458.8	58595.9														437	175.193	1257.7	1129.73	1216.91	1124.97	964.266	604.588	585.959
438	17520.6	126067	112920	121691	112420	96715.2	60396.7	58720.4														438	175.206	1260.67	1129.2	1216.91	1124.2	967.152	603.967	587.204
439	17445.4	126025	112840	121820	112420	96467.4	60578	58931.9														439	174.454	1260.25	1128.4	1218.2	1124.2	964.674	605.78	589.319
440	17399.2	125849	112804	121819	112581	96616.4	60540.9	58929.8														440	173.992	1258.49	1128.04	1218.19	1125.81	966.164	605.409	589.298
441	17511.3	126165	112907	121813	112725	96650.4	60722.3	59075.4														441	175.113	1261.65	1129.07	1218.13	1127.25	966.504	607.223	590.754
442	17461.1	126101	112996	121852	112706	96666.8	60712.4	59061.9														442	174.611	1261.01	1129.96	1218.52	1127.06	966.668	607.124	590.619
443	17531.9	125934	112866	121994	112737	96823.2	60607.5	59068.7														443	175.319	1259.34	1128.66	1219.94	1127.37	968.232	606.075	590.687
444	17506.6	126164	113124	121990	112533	96879.6	60667.5	59088.5														444	175.066	1261.64	1131.24	1219.9	1125.33	968.796	606.675	590.885
445	17502	126027	112996	121983	112898	96886.7	60691.7	59269.1														445	175.02	1260.27	1129.96	1219.83	1128.98	968.867	606.917	592.691
446	17457.2	126160	113209	121910	112728	96861.7	60930.3	59240														446	174.572	1261.6	1132.09	1219.1	1127.28	968.617	609.303	592.4
447	17406.4	126196	113090	121857	112882	97052.9	60939.9	59392.4														447	174.064	1261.96	1130.9	1218.57	1128.82	970.529	609.399	593.924
448	17447.5	126057	113137	122135	112941	97058.6	60958.3	59284.2														448	174.475	1260.57	1131.37	1221.35	1129.41	970.586	609.583	592.842
449	17524.6	126101	113199	122205	112725	97291.5	61180.7	59411.6														449	175.246	1261.01	1131.99	1222.05	1127.25	972.915	611.807	594.116
450	17511.3	126196	112940	122053	113087	97080.2	61045.6	59325.1														450	175.113	1261.96	1129.4	1220.53	1130.87	970.802	610.456	593.251
451	17467.1	126168	113272	122348	113067	97217.4	61040.2	59427.3														451	174.671	1261.68	1132.72	1223.48	1130.67	972.174	610.402	594.273
452	17411	126299	113337	122302	112810	97221.9	61221.4	59555.8														452	174.11	1262.99	1133.37	1223.02	1128.1	972.219	612.214	595.558
453	17429.9	126206	113316	122243	113316	97283.7	61170.9	59575.2														453	174.299	1262.06	1133.16	1222.43	1133.16	972.837	611.709	595.752
454	17432.7	126269	113257	122073	113126	97315.2	61300.7	59801														454	174.327	1262.69	1132.57	1220.73	1131.26	973.152	613.007	598.01
455	17437.6	126408	113117	121952	113145	96974.5	61502.7	59596.7														455	174.376	1264.08	1131.17	1219.52	1131.45	969.745	615.027	595.967
456	17503.1	125997	113363	122177	113133	97413.9	61311.2	59638.6														456	175.031	1259.97	1133.63	1221.77	1131.33	974.139	613.112	596.386
457	17433.6	126244	113380	122350	113358	97383.9	61321.8	59772.5														457	174.336	1262.43	1133.8	1223.5	1133.58	973.839	613.218	597.725
458	17455.5	126302	113151	122420	113192	97367.3	61449.2	59877.2														458	174.555	1263.02	1131.51	1224.2	1131.92	973.673	614.492	598.772
459	17414.8	126178	113331	122609	113356	97439.5	61478.9	59979														459	174.148	1261.78	1133.31	1226.09	1133.56	974.395	614.789	599.79
460	17431.4	126419	113310	122556	113480	97529.2	61561	59849.8														460	174.314	1264.19	1133.1	1225.56	1134.8	975.293	615.61	598.498
461	17490.2	126066	113434	122644	113465	97493.2	61519.5	59919														461	174.902	1260.66	1134.34	1226.44	1134.65	974.932	615.195	599.19
462	17436.9	126394	113519	122461	113342	97581.2	61591.6	60023.5														462	174.369	1263.94	1135.19	1224.61	1133.42	975.812	615.916	600.235
463	17515.3	126412	113241	122667	113312	97775.2	61589.8	60184.4														463	175.153	1264.12	1132.41	1226.67	1133.12	977.752	615.898	601.844
464	17477.7	126379	113328	122412	113490	97655.8	61796.3	60037.3														464	174.777	1263.79	1133.28	1224.12	1134.9	976.558	617.963	600.373
465	17403.7	126421	113476	122379	113363	97914.5	61640.3	60259.1														465	174.037	1264.21	1134.76	1223.79	1133.63	979.145	616.403	602.591
466	17455.2	126424	113265	122732	113532	97645.5	61866	60004.7														466	174.552	1264.24	1132.65	1227.32	1135.32	976.455	618.66	600.047
467	17444.8	126500	113375	122791	113657	97832.1	61897.7	60277.4														467	174.448	1265	1133.75	1227.91	1136.57	978.321	618.977	602.774
468	17439.3	126320	113460	122547	113715	97917.1	61797.1	60330.3														468	174.393	1263.2	1134.6	1225.47	1137.15	979.171	617.971	603.303
469	17404.6	126434	113373	122781	113638	97841.5	61912.3	60238.8														469	174.046	1264.34	1133.73	1227.81	1136.38	978.415	619.123	602.388
470	17439.3	126386	113628	122797	113867	97891.6	61918.9	60556.3														470	174.393	1263.86	1136.28	1227.97	1138.67	978.916	619.189	605.563
471	17430.7	126295	113460	122686	113709	97995.4	62100.9	60444.2														471	174.307	1262.95	1134.6	1226.86	1137.09	979.954	621.009	604.442
472	17438.8	126612	113538	122919	113963	97973.3	62109.7	60497.2														472	174.388	1266.12	1135.38	1229.19	1139.63	979.733	621.097	604.972
473	17428.1	126485	113667	122792	113563	98029.8	62290.4	60641.4														473	174.281	1264.85	1136.67	1227.92	1135.63	980.298	622.904	606.414
474	17329.5	126703	113547	122694	113901	97982.8	62131.1	60685.7														474	173.295	1267.03	1135.47	1226.94	1139.01	979.828	621.311	606.857
475	17415.5	126398	113499	122792	113730	98039.2	62260.8	60663.1														475	174.155	1263.98	1134.99	1227.92	1137.3	980.392	622.608	606.631
476	17427.7	126447	113531	122783	113997	98311.8	62276.4	60615.3														476	174.277	1264.47	1135.31	1227.83	1139.97	983.118	622.764	606.153
477	17375.6	126407	113602	123048	113803	98339	62187.2	60788.2														477	173.756	1264.07	1136.02	1230.48	1138.03	983.39	621.872	607.882
478	17412.8	126489	113692	122973	114085	98210	62306.9	60761														478	174.128	1264.89	1136.92	1229.73	1140.85	982.1	623.069	607.61
479	17451.1	126637	113924	122905	114087	98374.1	62315.5	60720.3														479	174.511	1266.37	1139.24	1229.05	1140.87	983.741	623.155	607.203
480	17437.2	126717	113462	122984	114071	98206.9	62386	60991.3														480	174.372	1267.17	1134.62	1229.84	1140.71	982.069	623.86	609.913
481	17427	126630	113667	123151	114147	98377.1	62470.7	60996.5														481	174.27	1266.3	1136.67	1231.51	1141.47	983.771	624.707	609.965
482	17490.6	126812	113711	122939	114287	98347.5	62400.8	61013.4														482	174.906	1268.12	1137.11	1229.39	1142.87	983.475	624.008	610.134
483	17461.2	126802	113643	123238	114152	98297.2	62496.9	61006.2														483	174.612	1268.02	1136.43	1232.38	1141.52	982.972	624.969	610.062
484	17516.5	126643	113918	123104	114248	98457.9	62603.7	60815.9														484	175.165	1266.43	1139.18	1231.04	1142.48	984.579	626.037	608.159
485	17352.3	126551	113806	123132	114318	98642.8	62644.6	61287.4														485	173.523	1265.51	1138.06	1231.32	1143.18	986.428	626.446	612.874
486	17435	126730	113870	123100	114239	98638.4	62583.9	61128.9														486	174.35	1267.3	1138.7	1231	1142.39	986.384	625.839	611.289
487	17450.1	126694	113456	123256	114079	98404.2	62686.4	61373.3														487	174.501	1266.94	1134.56	1232.56	1140.79	984.043	626.864	613.733
488	17429.7	126657	113749	123517	114434	98512.7	62742	61209.3														488	174.297	1266.57	1137.49	1235.17	1144.34	985.127	627.42	612.093
489	17409	126927	113855	123241	114222	98612.7	62866.8	61140.5														489	174.09	1269.27	1138.55	1232.41	1142.22	986.127	628.668	611.405
490	17468.1	126793	113826	123172	114299	98681.1	62830.4	61235.9														490	174.681	1267.93	1138.26	1231.72	1142.99	986.811	628.304	612.359
491	17440.6	126806	113635	123388	114430	98842.6	62903.9	61436.4														491	174.406	1268.06	1136.35	1233.88	1144.3	988.426	629.039	614.364
492	17425.7	126754	113621	123389	114411	98755.8	62951.7	61322.6														492	174.257	1267.54	1136.21	1233.89	1144.11	987.558	629.517	613.226
493	17421	126794	114007	123059	114434	98886.3	63033.4	61310.4														493	174.21	1267.94	1140.07	1230.59	1144.34	988.863	630.334	613.104
494	17456.6	126733	113736	123508	114567	98873.5	62965.5	61505.8														494	174.566	1267.33	1137.36	1235.08	1145.67	988.735	629.655	615.058
495	17495.4	126872	113724	123376	114663	98744.4	62967.8	61579.7														495	174.954	1268.72	1137.24	1233.76	1146.63	987.444	629.678	615.797
496	17387.6	126955	113844	123132	114474	99024.9	63040	61492														496	173.876	1269.55	1138.44	1231.32	1144.74	990.249	630.4	614.92
497	17413	126925	113852	123338	114586	98753.7	62934.3	61619.1														497	174.13	1269.25	1138.52	1233.38	1145.86	987.537	629.343	616.191
498	17374	126717	113844	123731	114551	98692.1	63076	61829.5														498	173.74	1267.17	1138.44	1237.31	1145.51	986.921	630.76	618.295
499	17456.2	126796	113998	123623	114810	99175.2	62967.1	61777.6														499	174.562	1267.96	1139.98	1236.23	1148.1	991.752	629.671	617.776
500	17433.4	126857	113884	123802	114640	99040.1	63223.3	61878.5														500	174.334	1268.57	1138.85	1238.02	1146.4	990.401	632.233	618.785
501	17435.3	126794	113788	123696	114660	99232.4	63142	61907.4														501	174.353	1267.94	1137.88	1236.96	1146.6	992.324	631.42	619.074
502	17357.8	126902	113785	123552	114793	99193.8	63228.9	61991.3														502	173.578	1269.02	1137.85	1235.52	1147.93	991.938	632.289	619.913
503	17443.7	126858	113879	123809	114899	99242.1	63311.1	61953.1														503	174.437	1268.58	1138.79	1238.09	1148.99	992.421	633.111	619.531
504	17404.8	127059	113784	123568	114673	99155.7	63303.1	61892.1														504	174.048	1270.59	1137.84	1235.68	1146.73	991.557	633.031	618.921
505	17407	127030	113747	123550	114734	99441	63311.6	61909.6														505	174.07	1270.3	1137.47	1235.5	1147.34	994.41	633.116	619.096
506	17450.8	126903	113868	123699	114955	99314.7	63339.7	62110														506	174.508	1269.03	1138.68	1236.99	1149.55	993.147	633.397	621.1
507	17516.5	126896	113973	123952	114697	99352.6	63443.1	62091.4														507	175.165	1268.96	1139.73	1239.52	1146.97	993.526	634.431	620.914
508	17450.2	127073	114023	123757	114899	99461	63573.7	62153.6														508	174.502	1270.73	1140.23	1237.57	1148.99	994.61	635.737	621.536
509	17390	126795	113943	123739	114981	99382.2	63388.6	62249.4														509	173.9	1267.95	1139.43	1237.39	1149.81	993.822	633.886	622.494
510	17464.8	126936	113908	123631	114765	99193.5	63555.2	62068.5														510	174.648	1269.36	1139.08	1236.31	1147.65	991.935	635.552	620.685
511	17421.7	127113	113941	123684	114792	99403.4	63613.7	62223.4														511	174.217	1271.13	1139.41	1236.84	1147.92	994.034	636.137	622.234
512	17411.2	127061	114050	123875	114996	99648.1	63632.9	62324.5														512	174.112	1270.61	1140.5	1238.75	1149.96	996.481	636.329	623.245
513	17497.2	127028	113981	123896	114946	99737	63670	62468.3														513	174.972	1270.28	1139.81	1238.96	1149.46	997.37	636.7	624.683
514	17412.5	126902	113879	124006	115017	99609.2	63616.5	62558.8														514	174.125	1269.02	1138.79	1240.06	1150.17	996.092	636.165	625.588
515	17444.6	127204	114029	123748	115011	99416.7	63906.2	62606.5														515	174.446	1272.04	1140.29	1237.48	1150.11	994.167	639.062	626.065
516	17380.4	127130	114063	123744	115071	99528.8	63723.5	62578.2														516	173.804	1271.3	1140.63	1237.44	1150.71	995.288	637.235	625.782
517	17428.3	127111	114003	123838	115107	99580.6	63838	62587.2														517	174.283	1271.11	1140.03	1238.38	1151.07	995.806	638.38	625.872
518	17307.5	126887	114055	123918	115147	99625.3	63791	62651.3														518	173.075	1268.87	1140.55	1239.18	1151.47	996.253	637.91	626.513
519	17347.3	127075	113962	123944	115268	99461.4	63916.8	62685.5														519	173.473	1270.75	1139.62	1239.44	1152.68	994.614	639.168	626.855
520	17422.2	127338	113993	123895	115188	99656	63973.6	62619														520	174.222	1273.38	1139.93	1238.95	1151.88	996.56	639.736	626.19
521	17417.1	127159	114028	123887	115299	99756.2	63987.2	62704.9														521	174.171	1271.59	1140.28	1238.87	1152.99	997.562	639.872	627.049
522	17446.2	127199	114196	123906	115348	99730.2	64003.6	62760.8														522	174.462	1271.99	1141.96	1239.06	1153.48	997.302	640.036	627.608
523	17452	127308	114029	124089	115220	99772.6	63985.7	62825.4														523	174.52	1273.08	1140.29	1240.89	1152.2	997.726	639.857	628.254
524	17388.5	126902	114022	123950	115307	99834.5	64115.3	63039.4														524	173.885	1269.02	1140.22	1239.5	1153.07	998.345	641.153	630.394
525	17464.2	126925	114063	124017	115534	99789	63982.4	62968.7														525	174.642	1269.25	1140.63	1240.17	1155.34	997.89	639.824	629.687
526	17378.1	127229	114259	124113	115224	99852.4	64056	63015.2														526	173.781	1272.29	1142.59	1241.13	1152.24	998.524	640.56	630.152
527	17449.8	127246	114040	124031	115330	99957.3	64165	63067.5														527	174.498	1272.46	1140.4	1240.31	1153.3	999.573	641.65	630.675
528	17398.8	127130	114038	124222	115384	99915.6	64164.1	63104.7														528	173.988	1271.3	1140.38	1242.22	1153.84	999.156	641.641	631.047
529	17455.3	127039	114001	124245	115406	99901.5	64211.6	63226.1														529	174.553	1270.39	1140.01	1242.45	1154.06	999.015	642.116	632.261
530	17355.8	127331	114125	124530	115498	99950.2	64285.7	63045														530	173.558	1273.31	1141.25	1245.3	1154.98	999.502	642.857	630.45
531	17478.5	127202	114077	123984	115509	100067	64393.3	63124.2														531	174.785	1272.02	1140.77	1239.84	1155.09	1000.67	643.933	631.242
532	17366	127125	114102	124065	115584	100081	64478.3	63418.8														532	173.66	1271.25	1141.02	1240.65	1155.84	1000.81	644.783	634.188
533	17466.3	127106	114364	124449	115641	99989.1	64525.7	63398.3														533	174.663	1271.06	1143.64	1244.49	1156.41	999.891	645.257	633.983
534	17368.3	127339	114011	124214	115484	100328	64442.6	63436.4														534	173.683	1273.39	1140.11	1242.14	1154.84	1003.28	644.426	634.364
535	17386.6	127237	114061	124331	115554	100200	64462.3	63508.6														535	173.866	1272.37	1140.61	1243.31	1155.54	1002	644.623	635.086
536	17364.1	127419	114103	124287	115705	100149	64512.7	63419.1														536	173.641	1274.19	1141.03	1242.87	1157.05	1001.49	645.127	634.191
537	17386.5	127007	114329	124362	115742	100188	64586.3	63524.8														537	173.865	1270.07	1143.29	1243.62	1157.42	1001.88	645.863	635.248
538	17383.6	126940	114282	124263	115707	100251	64552.4	63468.4														538	173.836	1269.4	1142.82	1242.63	1157.07	1002.51	645.524	634.684
539	17377.4	127301	114121	124162	115796	100397	64665.7	63545.8														539	173.774	1273.01	1141.21	1241.62	1157.96	1003.97	646.657	635.458
540	17258.2	127096	114190	124247	115606	100326	64631	63557.1														540	172.582	1270.96	1141.9	1242.47	1156.06	1003.26	646.31	635.571
541	17401.1	127100	114239	124270	115662	100571	64687.1	63489.4														541	174.011	1271	1142.39	1242.7	1156.62	1005.71	646.871	634.894
542	17371.8	127122	114137	124332	115766	100455	64770.2	63651.4														542	173.718	1271.22	1141.37	1243.32	1157.66	1004.55	647.702	636.514
543	17391.2	127297	113898	124439	115744	100287	64766	63597.8														543	173.912	1272.97	1138.98	1244.39	1157.44	1002.87	647.66	635.978
544	17428.3	127452	114180	124436	115655	100363	64738.4	63521.5														544	174.283	1274.52	1141.8	1244.36	1156.55	1003.63	647.384	635.215
545	17372.9	127448	113983	124471	115883	100304	64812	63728.3														545	173.729	1274.48	1139.83	1244.71	1158.83	1003.04	648.12	637.283
546	17410.7	127418	114329	124434	115893	100453	64892.3	63699.1														546	174.107	1274.18	1143.29	1244.34	1158.93	1004.53	648.923	636.991
547	17433.3	127366	114273	124688	115989	100499	64890.8	63750.6														547	174.333	1273.66	1142.73	1246.88	1159.89	1004.99	648.908	637.506
548	17406.2	127349	114403	124441	116072	100418	64822.3	64011.8														548	174.062	1273.49	1144.03	1244.41	1160.72	1004.18	648.223	640.118
549	17344.1	127465	114299	124324	115832	100448	64964.7	63690.4														549	173.441	1274.65	1142.99	1243.24	1158.32	1004.48	649.647	636.904
550	17366.4	127169	114238	124590	115836	100494	64904.1	63962.4														550	173.664	1271.69	1142.38	1245.9	1158.36	1004.94	649.041	639.624
551	17446.2	127366	114429	124451	115665	100480	64983.8	64040.7														551	174.462	1273.66	1144.29	1244.51	1156.65	1004.8	649.838	640.407
552	17378.8	127433	114200	124312	116105	100626	65068.6	64207.8														552	173.788	1274.33	1142	1243.12	1161.05	1006.26	650.686	642.078
553	17380.6	127530	114487	124536	116007	100670	64996.3	64226.3														553	173.806	1275.3	1144.87	1245.36	1160.07	1006.7	649.963	642.263
554	17303.9	127296	114202	124598	115918	100695	65106.6	64044.3														554	173.039	1272.96	1142.02	1245.98	1159.18	1006.95	651.066	640.443
555	17407.6	127602	114580	124437	116033	100718	65129.2	64052.5														555	174.076	1276.02	1145.8	1244.37	1160.33	1007.18	651.292	640.525
556	17456.8	127230	114335	124292	115757	100545	64992	64300.4														556	174.568	1272.3	1143.35	1242.92	1157.57	1005.45	649.92	643.004
557	17408.8	127357	114212	124601	115884	100930	65153.9	64370.3														557	174.088	1273.57	1142.12	1246.01	1158.84	1009.3	651.539	643.703
558	17455.8	127233	114400	124753	116043	100695	65457.7	64437.3														558	174.558	1272.33	1144	1247.53	1160.43	1006.95	654.577	644.373
559	17379.9	127148	114278	124530	115969	100764	65276.2	64309.7														559	173.799	1271.48	1142.78	1245.3	1159.69	1007.64	652.762	643.097
560	17389.7	127505	114264	124790	115825	100781	65367.6	64122.4														560	173.897	1275.05	1142.64	1247.9	1158.25	1007.81	653.676	641.224
561	17356.2	127366	114354	124500	115862	100949	65284.8	64509.2														561	173.562	1273.66	1143.54	1245	1158.62	1009.49	652.848	645.092
562	17395.9	127430	114243	124575	116377	101030	65376.5	64471.4														562	173.959	1274.3	1142.43	1245.75	1163.77	1010.3	653.765	644.714
563	17419.9	127552	114342	124571	116256	100911	65338	64492.5														563	174.199	1275.52	1143.42	1245.71	1162.56	1009.11	653.38	644.925
564	17381.6	127483	114333	124702	116255	100935	65486	64506.1														564	173.816	1274.83	1143.33	1247.02	1162.55	1009.35	654.86	645.061
565	17429.1	127517	114398	125000	116071	100937	65464.2	64445.4														565	174.291	1275.17	1143.98	1250	1160.71	1009.37	654.642	644.454
566	17366.5	127431	114357	124707	116177	100985	65713.9	64589.3														566	173.665	1274.31	1143.57	1247.07	1161.77	1009.85	657.139	645.893
567	17292	127562	114212	124836	115984	101148	65498.5	64651.1														567	172.92	1275.62	1142.12	1248.36	1159.84	1011.48	654.985	646.511
568	17440.4	127581	114372	124556	116300	101033	65435.6	64699.1														568	174.404	1275.81	1143.72	1245.56	1163	1010.33	654.356	646.991
569	17280.8	127349	114358	124750	116387	100880	65634.9	64690.1														569	172.808	1273.49	1143.58	1247.5	1163.87	1008.8	656.349	646.901
570	17358.3	127214	114496	124796	116344	101008	65680.5	64587														570	173.583	1272.14	1144.96	1247.96	1163.44	1010.08	656.805	645.87
571	17309.1	127437	114425	124808	116234	101115	65717	64890.4														571	173.091	1274.37	1144.25	1248.08	1162.34	1011.15	657.17	648.904
572	17419.8	127598	114480	124845	116343	101020	65706.4	64827.4														572	174.198	1275.98	1144.8	1248.45	1163.43	1010.2	657.064	648.274
573	17357.7	127885	114456	125025	116208	100967	65650.8	64752.9														573	173.577	1278.85	1144.56	1250.25	1162.08	1009.67	656.508	647.529
574	17483.1	127510	114327	124871	116181	101200	65658.5	64894.8														574	174.831	1275.1	1143.27	1248.71	1161.81	1012	656.585	648.948
575	17372	127389	114319	124553	116154	101083	65747.3	65086.7														575	173.72	1273.89	1143.19	1245.53	1161.54	1010.83	657.473	650.867
576	17371	127444	114339	124928	116439	101189	65822.9	64983.1														576	173.71	1274.44	1143.39	1249.28	1164.39	1011.89	658.229	649.831
577	17396.3	127577	114439	124755	116368	101253	65893.3	64870.3														577	173.963	1275.77	1144.39	1247.55	1163.68	1012.53	658.933	648.703
578	17389.4	127373	114241	124932	116359	101387	65899	65154.7														578	173.894	1273.73	1142.41	1249.32	1163.59	1013.87	658.99	651.547
579	17385.2	127512	114291	124956	116368	101325	65879.1	65052.6														579	173.852	1275.12	1142.91	1249.56	1163.68	1013.25	658.791	650.526
580	17363.1	127476	114340	125013	116644	101235	65911.7	65128.3														580	173.631	1274.76	1143.4	1250.13	1166.44	1012.35	659.117	651.283
581	17401.8	127501	114328	124889	116391	101397	65948.2	65342.6														581	174.018	1275.01	1143.28	1248.89	1163.91	1013.97	659.482	653.426
582	17291	127369	114255	124969	116441	101262	66085.1	65151.1														582	172.91	1273.69	1142.55	1249.69	1164.41	1012.62	660.851	651.511
583	17396.3	127542	114348	124991	116463	101577	66132.9	65217.3														583	173.963	1275.42	1143.48	1249.91	1164.63	1015.77	661.329	652.173
584	17305.3	127517	114471	125103	116270	101306	66025.8	65076.3														584	173.053	1275.17	1144.71	1251.03	1162.7	1013.06	660.258	650.763
585	17332	127691	114408	124870	116642	101264	66147.5	65431.9														585	173.32	1276.91	1144.08	1248.7	1166.42	1012.64	661.475	654.319
586	17288.7	127549	114464	124933	116428	101317	66161.5	65202.5														586	172.887	1275.49	1144.64	1249.33	1164.28	1013.17	661.615	652.025
587	17426.5	127660	114219	124848	116554	101530	66239.9	65345.2														587	174.265	1276.6	1142.19	1248.48	1165.54	1015.3	662.399	653.452
588	17424.6	127619	114366	125150	116751	101543	66160.3	65353.4														588	174.246	1276.19	1143.66	1251.5	1167.51	1015.43	661.603	653.534
589	17378.4	127635	114178	125135	116740	101624	66108.9	65296.4														589	173.784	1276.35	1141.78	1251.35	1167.4	1016.24	661.089	652.964
590	17295	127737	114466	125139	116492	101488	66194.8	65319.2														590	172.95	1277.37	1144.66	1251.39	1164.92	1014.88	661.948	653.192
591	17385.2	127714	114193	124827	116545	101301	66187.6	65497														591	173.852	1277.14	1141.93	1248.27	1165.45	1013.01	661.876	654.97
592	17380.4	127572	114545	124956	116475	101715	66217.7	65568.8														592	173.804	1275.72	1145.45	1249.56	1164.75	1017.15	662.177	655.688
593	17397	127537	114315	125099	116685	101701	66359.5	65457.2														593	173.97	1275.37	1143.15	1250.99	1166.85	1017.01	663.595	654.572
594	17418.7	127588	114375	124936	116716	101516	66462.7	65549														594	174.187	1275.88	1143.75	1249.36	1167.16	1015.16	664.627	655.49
595	17410.2	127661	114233	125146	116553	101711	66314.4	65584.8														595	174.102	1276.61	1142.33	1251.46	1165.53	1017.11	663.144	655.848
596	17354.4	127339	114537	124968	116662	101705	66315.8	65742														596	173.544	1273.39	1145.37	1249.68	1166.62	1017.05	663.158	657.42
597	17392.4	127453	114287	125036	116538	101792	66424.6	65692.1														597	173.924	1274.53	1142.87	1250.36	1165.38	1017.92	664.246	656.921
598	17432.4	127680	114482	125160	116795	101537	66589.2	65629.2														598	174.324	1276.8	1144.82	1251.6	1167.95	1015.37	665.892	656.292
599	17357.3	127640	114269	125043	116850	101789	66577.7	65737.4														599	173.573	1276.4	1142.69	1250.43	1168.5	1017.89	665.777	657.374
600	17414.8	127879	114430	124932	116799	101730	66509.7	65949.4														600	174.148	1278.79	1144.3	1249.32	1167.99	1017.3	665.097	659.494
