# Supplementary material for: Daptomycin forms a stable complex with phosphatidylglycerol for selective uptake to bacterial membrane
Source: eLife. 2025 Jun 2;13:RP93267. doi: 10.7554/eLife.93267 (PMC12129450; doi:10.7554/eLife.93267)
Supplement: Figure 3—figure supplement 1—source data 2. [file elife-93267-fig3-figsupp1-data2.xlsx]

## Sheet: Multi Scans EM
Multi Scans EM
Labels	20C	25C	30C	35C	40C	45C	50C	55C	60C	65C	70C	75C	80C	85C
Type	Emission Scan	Emission Scan	Emission Scan	Emission Scan	Emission Scan	Emission Scan	Emission Scan	Emission Scan	Emission Scan	Emission Scan	Emission Scan	Emission Scan	Emission Scan	Emission Scan
Comment
Start	385	385	385	385	385	385	385	385	385	385	385	385	385	385
Stop	700	700	700	700	700	700	700	700	700	700	700	700	700	700
Step	1	1	1	1	1	1	1	1	1	1	1	1	1	1
Fixed/Offset	365	365	365	365	365	365	365	365	365	365	365	365	365	365
Xaxis	Wavelength	Wavelength	Wavelength	Wavelength	Wavelength	Wavelength	Wavelength	Wavelength	Wavelength	Wavelength	Wavelength	Wavelength	Wavelength	Wavelength
Yaxis	Counts	Counts	Counts	Counts	Counts	Counts	Counts	Counts	Counts	Counts	Counts	Counts	Counts	Counts
Scan Corr. by File	TRUE	TRUE	TRUE	TRUE	TRUE	TRUE	TRUE	TRUE	TRUE	TRUE	TRUE	TRUE	TRUE	TRUE
Corr. by Ref. Det.	TRUE	TRUE	TRUE	TRUE	TRUE	TRUE	TRUE	TRUE	TRUE	TRUE	TRUE	TRUE	TRUE	TRUE
Fixed/Offset Corr. by File	FALSE	FALSE	FALSE	FALSE	FALSE	FALSE	FALSE	FALSE	FALSE	FALSE	FALSE	FALSE	FALSE	FALSE
Repeats	1	1	1	1	1	1	1	1	1	1	1	1	1	1
Dwell Time	0.1	0.1	0.1	0.1	0.1	0.1	0.1	0.1	0.1	0.1	0.1	0.1	0.1	0.1
Lamp	Xenon	Xenon	Xenon	Xenon	Xenon	Xenon	Xenon	Xenon	Xenon	Xenon	Xenon	Xenon	Xenon	Xenon
Temp	18.8	22.2	26.6	30.95	35.35	39.85	44.25	48.65	53.15	57.35	61.75	66.3	70.65	75.8
Scan Polariser	None	None	None	None	None	None	None	None	None	None	None	None	None	None
Scan Slit	3.00015	3.00015	3.00015	3.00015	3.00015	3.00015	3.00015	3.00015	3.00015	3.00015	3.00015	3.00015	3.00015	3.00015
Fixed/Offset Polariser	None	None	None	None	None	None	None	None	None	None	None	None	None	None
Fixed/Offset Slit	3.00015	3.00015	3.00015	3.00015	3.00015	3.00015	3.00015	3.00015	3.00015	3.00015	3.00015	3.00015	3.00015	3.00015
Detector	pmt900	pmt900	pmt900	pmt900	pmt900	pmt900	pmt900	pmt900	pmt900	pmt900	pmt900	pmt900	pmt900	pmt900
385	265.361	336.142	287.152	294.292	268.308	267.594	375.307	309.52	274.848	271.966	269.184	289.443	243.582	251.253
386	280.584	308.535	317.254	276.639	305.496	269.075	389.211	286.485	241.106	279.621	230.261	279.428	268.843	235.616
387	272.696	317.864	316.965	292.933	297.592	322.299	354.568	296.007	287.974	255.096	310.518	227.069	273.003	225.67
388	296.887	372.38	349.441	314.872	325.103	276.799	335.426	336.826	307.121	278.695	271.809	300.755	299.005	292.133
389	305.229	303.87	281.953	326.11	291.742	309.606	395.272	343.881	307.899	294.209	304.673	261.433	295.467	305.857
390	264.528	372.036	334.788	353.26	356.159	283.735	390.194	343.228	290.42	325.345	255.182	337.545	302.416	323.731
391	278.35	355.456	307.522	315.746	331.673	338.773	366.879	322.552	314.786	336.506	326.108	299.89	282.283	305.863
392	313.743	336.296	340.811	308.426	349.187	294.897	370.894	347.653	300.677	317.374	305.754	309.864	336.553	288.425
393	316.917	367.571	333.763	322.081	341.732	314.934	425.742	303.899	354.773	289.508	297.184	305.18	296.775	321.619
394	340.023	377.707	322.419	312.258	398.831	352.46	401.213	345.892	338.142	351.927	318.483	329.974	310.195	315.609
395	355.345	390.368	406.017	389.18	374.621	384.678	435.701	353.626	324.399	335.598	349.293	370.931	337.475	355.426
396	398.809	463.227	470.339	374.849	431.668	482.417	445.111	417.173	394.264	412.275	378.516	373.514	350.613	379.33
397	396.915	483.592	456.474	416.258	462.464	414.425	469.541	469.721	402.382	439.29	364.715	368.664	379.598	418.388
398	430.917	563.657	542.375	529.83	509.392	517.415	533.361	452.906	453.677	482.683	439.584	480.74	450.767	412.869
399	566.318	559.965	542.475	555.42	564.479	514.019	561.854	509.76	485.293	506.002	482.533	502.466	491.528	453.486
400	594.848	645.223	600.821	547.133	577.861	596.485	583.111	574.466	553.859	587.431	534.463	521.409	463.793	546.955
401	651.805	721.893	721.159	665.953	661.129	654.454	628.229	618.881	615.768	515.395	594.178	595.836	551.809	528.435
402	848.137	786.906	796.845	696.045	819.416	689.855	723.024	645.899	660.04	659.482	627.264	540.42	642.852	607.362
403	855.1	937.454	867.762	852.212	815.073	774.867	777.441	777.722	729.483	753.674	689.281	699.988	677.245	627.79
404	967.322	1044.88	1011.49	942.964	858.847	942.166	797.837	774.834	824.972	760.986	758.142	761.613	762.11	747.924
405	1171.3	1180.04	1084.06	1040.95	1030.38	987.253	1001.75	944.633	905.232	861.168	859.565	793.902	843.483	770.857
406	1315.22	1399.08	1320.87	1244.21	1136.9	1088	1165.96	1033.09	1073.55	990.005	985.769	911.824	971.964	876.665
407	1529.7	1471.7	1438.72	1374.19	1324.65	1282.86	1272.32	1270.81	1196.66	1061.33	1119.11	1074.79	974.373	993.245
408	1895.74	1800.24	1660.72	1627.58	1522.73	1579.97	1401.8	1414.5	1346.99	1235.73	1269.96	1163.92	1197.51	1170.9
409	2246.67	2133.76	2048.29	1850.61	1860.14	1807.68	1752.86	1725.61	1587.7	1494.44	1461.45	1382.13	1410	1377.59
410	2691.85	2556.99	2522.32	2440.14	2266.39	2123.63	2098.12	2055.75	1921.21	1844.72	1830.22	1833.84	1629.29	1666.84
411	3473.99	3245.96	3121.37	2839.87	2856.91	2621.32	2626.95	2486.34	2391.94	2252.26	2346.59	2110.11	1998.04	2037.5
412	4110.09	3926.32	3800.57	3751.71	3499.98	3226.72	3136.11	3011.38	2952.94	2895.06	2747.97	2672.51	2580.11	2572.52
413	5028.32	4863.85	4631.37	4400.7	4336.92	4115.91	3983.12	3862.66	3713.09	3705.1	3382.29	3439.49	3358.7	3085.67
414	6036.05	5770.84	5590.96	5439.12	5276	5136.29	4815.25	4676.21	4685.62	4440.54	4266.15	4167.79	4111.67	3966.32
415	6982.14	6856.94	6674.48	6200.24	6316.77	5838.19	5590.54	5654.97	5351.12	5181.51	5116.35	5055.36	4846.72	4788.61
416	7896.11	7653.11	7532.05	7030.23	6976.72	6647.83	6553.96	6371.77	6143.92	6024.31	5797.77	5584.22	5471.33	5401.79
417	8524.68	8431.23	8110.81	7872.93	7522.15	7284.85	7034.49	6930.53	6811.86	6604.73	6409.31	6337.6	6179.26	5920.06
418	8848.2	8765.53	8564.07	8358.46	7960.63	7926.06	7629.81	7399.59	7068.91	7046.99	6896.88	6731.17	6605.23	6434.58
419	9317.36	9106.95	8781.21	8372.91	8204.49	7925.69	7688.24	7535.36	7217.28	7029.43	6924.49	6656.71	6687.45	6447.37
420	9527.15	9123.13	8787.49	8346.56	8018.41	8000.75	7724.33	7228.82	7271.34	7079.98	6856.28	6646.22	6354.48	6285.09
421	9476.92	8923.21	8475.01	8129.46	7902.73	7432.61	7235.4	6855.5	6813.18	6690.59	6269.92	6154.61	6046.08	5882.11
422	9283.45	8978.33	8317.08	7837.35	7632.7	7133.66	6887.51	6546.98	6411.93	6207.56	6098.77	5841.37	5576.42	5292.91
423	9509.23	8767.28	8194.28	7865.64	7416.98	6989.01	6647.1	6362.46	5946.44	5708.95	5568.7	5480.26	5028.11	5137.72
424	9639.15	8984.98	8459.77	7799.92	7328.38	6962.11	6647.58	6254.22	6007.28	5817.15	5379.99	5292.97	5008.17	4516.66
425	9956.32	9581.07	8640.77	8100.66	7371.48	7070.93	6903.99	6414.07	6050.12	5659.48	5495.02	5116.29	5005.97	4727.19
426	10779.5	9933.59	9058.03	8418.01	8015.14	7571.57	6969.93	6641.71	6141.96	5870.29	5505.96	5304.33	5047.33	4915.85
427	11409.6	10537.3	9671.58	8968.23	8449.32	7993.46	7276.41	6812.53	6469.4	6161.06	5842.03	5538.25	5442.71	5071.5
428	12229.1	11211.8	10378	9827.22	9045.6	8448.49	7730.29	7646.97	6966.06	6620.27	6142.92	5882.71	5580.49	5168
429	12875.1	11951.5	10919.5	10264.2	9512.35	9066.75	8329.21	7782.63	7290.8	6713.1	6504.4	6112.83	5937.92	5642.85
430	13836	12658.7	11722.9	10915.4	10422.3	9625.66	9015.03	8477.71	7717.18	7406.97	7090.36	6509.01	6041.79	5888.36
431	14692.8	13583.9	12200.8	11439.8	11055.1	10014.9	9308.51	8834.62	8038.54	7869.02	7188.89	6920.81	6674.6	6095.27
432	15567.9	14365.5	13287.7	12177.9	11505.2	10642.6	9968.92	9167.91	8681.54	8296.94	7803.41	7191.75	6853.59	6538.29
433	16408.7	14983.4	13735.8	12889.9	11969.9	11206.6	10414.7	9564.89	9276.93	8580.42	7952.4	7534.06	7215.85	6810.91
434	17400.2	15757.8	14660.1	13564.4	12653.2	11678.7	11180.1	10211.8	9609.8	9085.37	8457.4	8018.15	7605.47	6928.08
435	18174.1	16464.7	15215.9	14317.6	13419.5	12389.1	11336.9	10743.5	10146.8	9496.2	8750.93	8118.63	7917.2	7486.8
436	18991.6	17393.5	16201.4	14991.4	13758.6	12993.6	12033.9	11331.3	10530.4	9878	9290.17	8637.02	8159.12	7893.65
437	19882	18109.6	16640.7	15489.1	14385.8	13673.4	12525.5	11486.9	10764.7	10094.7	9634.51	9031.16	8535.21	8045.48
438	20514.4	19051.9	17567.5	16116.4	15224.6	14006.3	12952.6	12493.5	11361.9	10554.3	10152.6	9542.58	8927.18	8398.76
439	21429.3	19921.9	18011.5	16834.7	15703.1	14729.4	13451.9	12767.6	11806.2	11049	10413.8	10023.3	9016.08	8624.76
440	22369.2	20553.2	19040.9	17496.7	16126.1	15294.3	14180.8	13163	12266.2	11632	10786.6	10078.3	9469.42	9181.04
441	23271	21541.9	19428	18265.5	17063.3	15728.2	14645.2	13611.4	12545.9	11795.6	11236.4	10431.4	9831.72	9366.72
442	24066.4	22444.8	20237.7	18714.1	17334.7	16490.5	15102.1	14002.7	13150	12121.9	11585.1	10960.8	10444.1	9585.67
443	24976.6	22436.8	20897.9	19216.1	18057.6	16836.2	15479.6	14635.8	13684	12663.2	11871.5	11219.2	10794.7	10041.8
444	25441.5	23378.8	21888.5	19596.3	18461.8	17038.4	16163.9	15012.3	13902.9	13313.8	12551.4	11588.9	11019.5	10308.2
445	26454.2	24037.2	22025.7	20287.6	19138.8	17854.2	16483.2	15487	14369.1	13615.5	12671.4	12028.2	11066.8	10666.5
446	27168.1	25044.4	22938.1	21019.7	19896.8	18506.8	17030.2	15882.9	14859.3	14235.4	13131.4	12365	11737.2	10767.2
447	27900.3	25754.4	23595.6	21627.4	20262.6	18966.4	17291.5	16341	15516.7	14486.8	13609.4	12574.3	11994.8	11163.7
448	28581.5	26039.8	24515.4	22205.9	20590.4	19404.4	17874.8	16625.1	15661	14549.4	13809.2	12928.6	12418.4	11605.2
449	29382.8	26967.3	25042.4	22684.9	21485.2	19749.8	18371.5	17190.4	16066.8	15102.6	14324.9	13364.5	12550.6	11821.9
450	30146.1	27323.7	25188.6	22774.2	21730	20095.6	18690	17464.1	16422.9	15405.2	14590.3	13423	12667	12216.2
451	30729.4	28151.8	25929.9	23498.1	21852.2	20136.2	19235.7	18151.9	16706.3	15663.3	14619.7	14178.4	13407.1	12368
452	31151.1	28862.6	26275.4	24397.2	22527.9	20771.4	19597.2	18467.2	17145.2	15768.3	15141	14010.4	13471.1	12779.7
453	31946.8	29612.5	26923.8	24797.3	23273.3	21699.8	20339.9	18679.6	17640.3	16499.9	15353.3	14182	13759.7	12964.8
454	32834.6	29990.3	27470	25466.3	23616.1	22203.9	20423.1	18879	17802.6	16476.8	15615.7	14865.6	14050.5	13212.8
455	32765.1	30358.7	27447.5	26037.9	24167.1	22160.2	20882.6	19191.4	18152.6	16742.6	15691.5	14992.6	14130.8	13569.2
456	33713.3	30974.7	28026.5	26373.4	24455.5	22838.1	20985.4	19503.4	18345.2	17263.3	16322.3	15179.3	14409.1	13567.1
457	34250.3	31126.8	28829	26453.8	24892.4	22935.6	21311.4	19942.4	18666.3	17350	16430.5	15400.7	14666.2	13809
458	34041.2	31560	29192	26823.3	24783.6	23203.1	21723.8	20212.2	18977.8	17605.9	16713	15762.8	14808.3	13633.1
459	35167.7	32040.8	29532.1	27178.2	25547.8	23992.8	22040.1	20517.6	19297.4	17597.1	16809.8	15881.1	14996.2	14046.9
460	35633.4	32486.6	30067.8	27831.5	25921	24030.6	22096.5	20699.8	19654	17915.1	17163.4	15998.6	15218.5	14368.9
461	36082.6	33072.6	30311.6	27964.6	26272.7	24556.3	22374.6	20911.2	19594.5	18442.9	17452.6	16317.8	15291.2	14297
462	36087.3	33079.5	30529.3	28323.1	26316.5	24658.3	22841.6	21496.2	20200.2	18698.9	17442	16739.1	15647.6	14526.7
463	36785.9	33543.2	31301.4	28406.8	26875.5	24588.8	23037.2	21464.8	20120	19145.2	17893.8	16828.1	15713.1	14654
464	36806.6	33956.6	31385.4	28961.9	26829.8	24795.2	23504.3	21809.4	19990.2	19428.3	17808.2	16881.7	15699	15218.8
465	37019	34455.1	31766.5	28695.3	26999.3	25020.6	23574.3	21834.3	20529	19292	18201.5	17142.7	16019.3	15294.7
466	37335.2	34719.5	31854.8	28862.5	27423.2	25422.3	23924.3	22129.2	20671.1	19204.1	18113.5	17102.4	16161.7	14921
467	37679.4	34374.2	31825.5	29445.3	27159.1	25583.6	24035.1	22357	20804.2	19444.9	18684.8	17101.4	16263	15177
468	38106	34873.4	31923.8	29668.5	27776.4	25865.4	23770.8	22535.4	20888.8	19464	18139.1	17192	16072.8	15524
469	37859.7	34592.2	32455.8	29716.9	27725.9	26327.1	23723	22504.9	20902.6	19662.4	18561.5	17689.5	16499	15516.1
470	38180	35143	32336.8	30070	27952.4	26220.9	24233.8	22736.4	20894.3	19548.5	18461.5	17631.9	16759.6	15505.3
471	38130.8	35480.7	32279.7	30104.8	28202.9	26205.5	24225.8	22724.4	21215.1	19963.4	18916	17728.9	16538.2	15705.6
472	38455.3	35832.5	32890.1	30092.4	28624.4	26099.6	24011.7	22941.9	20917.1	19892.5	18849	17644.5	16829.9	15646
473	38837	35438	32675.8	30088.1	28112.9	26116.6	24111.5	23191.2	21118.7	20185.3	19064.4	17744	16855.6	15567.8
474	38097.9	35413.5	32851.3	30463.7	28179	26082.9	24304.1	23067.4	21221.6	20254.6	18558.2	17708.3	16698.9	15771.4
475	38496.6	35148.3	32826.4	29710.9	28301.3	26493.9	24480.4	22812	21556.9	20157.8	19176.4	17598.2	16954.4	15803.6
476	38525.7	35287.2	32771.3	29849.7	28240.2	26173.8	24718.7	23218.3	21459.4	20164.8	19182.4	17657.8	16689.8	15802.4
477	38792	35584	32733.8	30013.6	28237.3	26263	24486.9	22736.8	21418.2	20508	19062.2	17924.6	16562.1	16002.4
478	38174.6	35598.4	32946.1	30401.3	28441.9	26797.1	24699.9	22892.6	21619.2	20305.1	19138.2	17741.5	16953.2	16310.7
479	38475	35828.8	32694.1	29902.6	27955.6	26518.1	24224	23095.6	21433.9	20058.7	19145.8	18011.2	17071.4	15930.3
480	38720.7	35551.3	32494.8	30322.6	28470.3	26265.3	24509.8	23152.3	21259.8	20098.5	19008.6	17944.6	17010.5	15967.2
481	38415.4	35268.2	32509.1	30096	28479.1	26031.8	24599.3	23024.6	21239.4	20192.3	18930.1	17688	16926.8	15732.1
482	38258.1	35144.1	32424.6	30253.3	28102.4	26028.1	24530.3	22376.5	21186.6	19892.9	18936.8	17811.3	16594.2	15913.5
483	38071.2	34719.3	32414	29759.2	27723	26387.7	24001.5	22531.3	21467.2	20071.1	18855.7	18046.7	16513.9	15756.7
484	37954	34572.7	32135.9	29422.9	27792.4	26145.9	24276.6	22475	21043.9	20011.1	18759.4	17611.2	16656	15716.2
485	37595.6	34395.6	31980.8	29623.4	27809.3	25510.5	24613.7	22675.7	21372.6	19763	18809.4	17705.2	16752.9	15722.2
486	37151.4	34357.6	31838.6	29548.8	27687.4	25670.3	24163.8	22492.7	20941.4	19779.8	18680.1	17465.2	16676.9	15749
487	36903.6	34230.3	31677.2	29520.8	27506.8	25594	23872.9	22354.7	21203.2	19344.3	18552.9	17278.4	16794.7	15265.8
488	36774.7	34113.4	31681	28832	27311.9	25178.9	23916.5	22112.5	20776.7	19630	18135.1	17234.5	16085.8	15442.2
489	36602	33502.7	30906	29085.9	27113.2	25024.1	23646.4	21980.5	20727	19230.2	18520.9	16962.7	16153.8	15212.1
490	36296.9	33770.2	30995.1	28338.6	26841.5	25310.8	23480.6	21995	20435.8	19434.7	18150.2	17062.9	16611.2	15216.3
491	36111	33357.7	30747.8	28624.2	26581.8	25072.8	23263.3	21744.1	20467.6	19381.6	18170.3	17166.4	16222.9	15386.2
492	35488	33214.2	30772.6	28455.3	26739.1	24945	23097.3	21816.8	20084.4	18942.7	18055.4	16987.4	15791.8	15172.1
493	36004.9	32571.9	30378.8	28220.3	26735.9	24884.3	23256.4	21795	20003.9	19016.3	17743.6	17002.8	15931.9	15088.5
494	35128.7	32273.6	30101.2	27902.1	25902.5	24611.1	22848.7	21385.1	19733.8	18918.1	17602.6	16586.8	15943.7	15070.7
495	34854.6	32078.5	29763	27709.1	25930	24195.7	22597.8	21456.7	19912.8	18978.2	17882.5	16815.3	15681.5	15021.8
496	34712.2	31946	29786.7	27315.5	25712	23964.9	22396.2	21206.4	19320.9	18488.3	17564	16244.4	15744	14625.5
497	34145	31635	29501.4	26899.4	25493.5	24073.1	22254.9	20437.6	19277.2	18377.8	17345.3	16266.1	15613.6	14547.4
498	34077.7	31039.2	29389.9	26456.2	25020	24136.9	22296.4	20709	19245.1	18459.3	17221.4	16563.7	15347	14677.5
499	33378.5	31501.1	28589.2	26749.7	24928.4	23380.7	21940.9	20605.2	19113.7	18161.7	16999.6	16188.1	15587.6	14316.4
500	33346.7	31037.6	28058.4	26145.3	25152.3	23198.2	21867.6	20194.3	19051.4	17539.4	17105.5	15977	15180.8	14485.1
501	32900.5	30081.5	28096.3	26086.1	24311.8	22861.7	21597.5	20103.5	18636.6	17837.9	16618.9	15677.8	14944.5	14079.1
502	32209	29696.7	28173	25495.8	24171.5	22638.6	21139.9	19965.7	18617.8	17705.6	16866.6	15772.4	14597.9	13954.2
503	32379.9	29741.2	27566.6	25832	24154	22789.6	20671.6	19413.9	18675.2	17656.3	16238.2	15834.1	14696.4	13833.8
504	31846	29536.7	27091.5	25505.8	23644.3	21931.1	20747.9	19435.5	18145.3	17144.8	16106.6	15200.2	14698.8	13673.8
505	31158	28906.1	26640.2	24847.9	23268.1	21616.9	20576.6	19479.5	17995.8	16626.2	15964.3	15231.7	14270.7	13656.3
506	30922.5	28184.5	26740.3	24681.4	23325.3	21819.1	20163.8	19128.8	17765.9	16722.3	15884.8	14773.6	14296.1	13152
507	30595.4	28311.9	26252.8	24086.1	22796.3	21533.3	20062.3	18459.8	17418.5	16419.8	15783.5	14562.9	14029.9	13236.7
508	30162.1	27549.9	26004.5	23980.5	22640.4	21086.6	19791.6	18677.1	17116.5	16370.2	15344.9	14773.3	14052.2	12990.4
509	29938.1	27453.4	25283.2	23928.6	22640.8	20910.7	19377.6	18375.9	17216.6	16265.8	15384.1	14537.9	13654.8	12995.1
510	30165.3	26765.8	25286.2	23105.5	21976.4	20778.9	19398.9	18108.9	17097.5	16270.3	14851.9	14117.4	13615.4	12852.8
511	29116.9	26904.1	24987.3	23122.2	21784.3	20348.9	18829.6	17629.4	16558.7	15651.7	14768.3	14222.3	13210.6	12587.4
512	28947.8	26429.4	24668.5	22437.3	21474.8	20329.1	18426.5	17678.3	16434.7	15585.9	14705.6	13857.6	12972.2	12432.6
513	27744.3	25871.7	24361.7	22305.3	21119.3	19799.8	18589.3	17498	16418.7	15181	14436.9	13663.2	13088.6	12327.2
514	27831.5	25448.6	24400.8	21986	20862.7	19814.1	18340.1	17380	16264.3	15200.3	14580.2	13684.3	13215.1	12385
515	27533.8	25379.8	23411.8	21887.5	20752.5	19304.4	18023	16624.9	16195.8	14855.7	14001.2	13468.4	12784.3	12280.8
516	26974.1	24593.1	23342.4	21417.9	20438.1	18874.6	17699.5	16574.4	15909.8	14899.6	14079.9	13221.8	12283.7	12014.3
517	26728.7	24486.7	23051.8	21313.8	19827.3	18806.4	17681.6	16192.6	15414	14652.2	13708.5	12989.3	12326	11822.6
518	26002.3	24120.2	22383.2	21164.4	19842.6	18208.9	17090.4	16128.2	15346.2	14357	13542.5	12891.7	12271.2	11621.6
519	25284.4	23643.8	21994.1	20651.1	19939	18143.6	17024.9	15932	14811.3	14140	13476.9	12736.6	12050.8	11567.3
520	25175.3	23325.6	22134	20459	19323.7	17831.8	16765.7	15583.3	14796.7	13684.5	13121.1	12667.1	11848.2	11062.8
521	24694.4	22966.4	21542.9	19849	18629.2	17873.7	16298.9	15880.5	14436.6	13824	13172.6	12323	11391.3	11260
522	24525.5	22517.5	21277.4	19597.1	18774.9	17204.2	16023.3	15349.6	14448	13351.3	12939.2	12275.5	11531.7	11028
523	24049	22600.4	20571	19621.2	18090.5	17131.4	15771.4	15031	14227.4	13154.6	12569.4	12097.9	11352.9	10698.6
524	23474.7	22105.6	20487.8	19008.4	18174.6	17030.5	15822.1	14474.3	13928.9	13204.3	12403	11775.2	11340.1	10709.3
525	23381	21537.8	20226.8	18314.4	17541.2	16543.6	15707.2	14634.2	13360.4	12989.6	12359.9	11567.3	10914.4	10688.5
526	22930	21476.8	19788.1	18469.5	17300.9	16242.1	15184.5	14382.8	13572.7	12734.1	12011.6	11341.5	10623.4	10285.7
527	22703.2	20917.5	19571.5	17977	17181.5	16135.8	15257.6	13953.3	13309.1	12687.7	11893.6	11482	10641.9	10153.3
528	22192.6	20491.5	19146	17939.3	16527.9	15625.2	14646.3	13970.8	12840.8	12352.6	11960.5	11236.6	10687.9	10080.5
529	22101.6	20335.2	18765.6	17637.9	16465.7	15143.5	14717.9	13699.3	12818.6	12159.1	11593.7	10561.6	10474.4	10080.9
530	21212.2	20005.4	18435.7	17277.9	15971.4	15183	14379.6	13545.3	12508.2	11776.6	11250.7	10661.2	10185.2	9766.05
531	21218.3	19843.6	18109.1	16887.8	15981.9	15199.8	13965.7	13323.6	12271.1	11943.8	10966.2	10341.7	10264.4	9552.37
532	20124.1	18877.6	17934.1	16267.7	15592.7	14495.7	13809.8	13082.8	12213.6	11825.7	10856.7	10518.7	9776.05	9304.8
533	20231.5	19024.3	17489.6	16268.3	15343.1	14587.6	13404.5	12567	11761.9	11336.4	10659.6	10248.5	9925.9	9128.82
534	20016.2	18420.2	16816.7	15722.9	15197.4	14327.4	13505.6	12378.8	11577.5	11125	10554.3	10068.4	9442.15	9092.12
535	19184.4	18059.6	16571.1	15831	14752.6	14018.7	13107.7	12483.2	11638.8	10931.2	10508.7	9875.91	9352.43	8814.93
536	19153.1	17904.4	16272.1	15377.6	14594.5	13648.6	12953.5	12238.2	11258.4	10849.3	10390.8	9821.73	9019.72	8599.86
537	18741	17206.3	16292.5	15443.4	14309.5	13617.5	12555.2	11723.7	11217.1	10473.2	9904.89	9541.09	8887.64	8698.12
538	18272.6	16915.1	16106.1	15097.1	13817.6	13316	12686.2	11621.3	11172.5	10464.1	10003.9	9326.41	8948.38	8493.26
539	18186.4	16823	15820.9	14429.9	13725	12674.5	12196.3	11600.7	10844.8	10125.5	9535.16	9170.36	8714.22	8244.8
540	17760.1	16303.8	15359	14509.2	13356	12547.9	11919.4	11043.8	10403.7	9877.09	9716.09	9098.4	8593.53	8360.09
541	17516.8	16087.6	15262.1	14142.3	13028.6	12446.7	11680	11029.9	10640.8	9837.55	9072.76	8992.59	8524.58	8009.25
542	17022.3	15852.2	14594.9	13966.3	12827.7	11975.5	11674.8	10751.8	10196.5	9755.63	9281.07	8805.19	8156.29	7992.55
543	16675.5	15569.3	14633	13253.8	12955	12020	11316	10536.8	9994.31	9512.39	9113.7	8651.08	8205	7679.79
544	16474	15374.8	14017.6	13519.5	12786.7	11687.4	10904.5	10538.5	9788.82	9401.77	8881.78	8462.45	8041.34	7673.96
545	15961.3	15105.5	14055.8	12900.8	12303.8	11751.5	10935.5	10127.3	9682.24	8886.48	8622.64	8181.36	7842.08	7505.78
546	16001.7	14745.9	13758.2	12928.6	12342.2	11338.9	10959.1	10184.5	9529.75	9041.46	8689.21	8067.64	7774.09	7574.82
547	15410.3	14367.2	13302.8	12554.7	11653.8	11140.2	10277.1	9910.76	9653.9	8736.06	8228.67	8243.58	7674.13	7295.65
548	15297.8	14037.9	13044.8	12288.5	11566.5	10928.7	10366.6	10032.7	9122.53	8649.52	8298.87	7748.02	7453.9	7284.95
549	15155.3	13988	13109.9	12308.4	11404.6	10944.7	10163.1	9490.27	9145.38	8432.1	8216.86	7620.06	7372.92	7275.2
550	14800.3	13190.5	12852.5	12007.8	11515.9	10704.1	9896.29	9264.74	8806.37	8305.54	8011.59	7439.05	7198.07	6769.59
551	14237.6	13491.8	12141.2	11729	11186.7	10314.2	9815.42	9225.53	8547.74	8218.23	7731.26	7568.44	7146.81	6715.36
552	13769.2	12917.2	12084.5	11381.8	10750.5	10224.8	9618.6	9114.78	8472.84	7712.94	7602.35	7401.24	7036.86	6604.61
553	13895.1	12911.1	12314	11529.8	10510.3	10018.6	9310.66	8742.68	8287.89	7850.74	7605.5	7115.88	6771.91	6685.87
554	13635.3	12672.6	11612.2	11058.4	10403.4	9807.17	9234.71	8842.31	8070.03	7810.45	7450.47	6841.64	6649.27	6438.12
555	13014.3	12546.5	11511.5	10928.8	10202.6	9452.09	9033.57	8465.06	7874.49	7479.26	7349.45	6974.63	6657.74	6159.87
556	13070.4	12029.9	11171.8	10807.2	10043	9413.63	8864.74	8528.93	8173.47	7452.5	7196.65	6867.06	6545.29	5966.48
557	12773.5	11662.5	10862.6	10212.6	9894.33	9123.48	8514.97	8256.26	7745.18	7516.53	6848.58	6553.77	6320.98	6017.83
558	12429.8	11617.6	10759.4	10181.8	9586.54	8877.14	8578.09	8142.81	7604.39	7001.82	6875.38	6519.73	6131.69	5912.06
559	12470.7	11351.1	10630.4	9680.89	9127.02	9287.87	8528.42	7973.48	7366.75	7086.22	6738.94	6459.96	6146.12	5990.05
560	11684.4	10931.2	10324.6	9650.28	9154.12	8698.7	8036.79	7663.67	7424.39	6815.23	6487.78	6183.85	6083.61	5808.21
561	11927.9	10750.6	10392.2	9780.97	8975.43	8479.6	8305.62	7659.38	7039.26	6944.27	6571.63	5935.07	6055.57	5685.15
562	11442.6	10889	9965.53	9396.69	9033.14	8548.89	7898.24	7648.88	7046.95	6763.89	6406.11	5812.63	5730.92	5446.25
563	11128.6	10583.5	9887.11	8880.11	8433.32	8456.33	7780.56	7300.18	6839.52	6449.65	6286.82	5938.78	5670.17	5364.37
564	11162.7	10126	9664.9	8787.33	8576.91	8094.58	7680.41	7068.91	6618.3	6406.06	6079.26	6161.21	5780.72	5246.75
565	10749.1	10248.9	9767.43	8440.17	8500.5	7776.62	7539.39	7107.84	6704	6477.5	6061.07	5859.48	5256.4	5221.01
566	10493.3	9994.21	9243.79	8708.99	8214.82	7856.49	7408.65	6986.02	6529.79	6163.54	6147.88	5725.75	5445.51	5081.99
567	10487.5	9586.82	8927.28	8452.62	8232.31	7382.13	7213.39	6931.2	6471.58	6012.29	5752.6	5616.86	5286.33	4976.22
568	10024.7	9604.81	8786.99	8318.85	8053.03	7611.73	7128.68	6733.16	6110.71	5929.74	5700.14	5383.29	5263.28	4833.84
569	9735.64	9127.93	8926.61	7862.08	7686.23	7092.84	6974.82	6451.36	6338.38	5996.73	5604.46	5121.84	5056.44	4962.62
570	9921.32	8695.44	8466.5	8059.4	7724.48	7074.87	6734.12	6664.34	6039.37	5794.98	5454.27	5225.07	5182.84	4733.89
571	9411.89	9106.95	8581.24	7809.39	7260.79	7043.22	6671.11	6282.5	5800.5	5556.53	5517.97	5072.54	4928.16	4598.16
572	9484.79	8769.34	8309.98	7830.89	7106.3	6742.06	6632.72	6223.06	5855.24	5294.58	5354.37	4890.07	4729.47	4645.84
573	9121.6	8412.24	8153.97	7605.18	7138.02	6818.54	6509.91	5913.12	5528.41	5488.98	5277.07	4844.07	4634.2	4512.88
574	9026.32	8495.02	7830.35	7232.63	6928.26	6689.75	6031.33	5912.04	5603.52	5291.47	5159.62	4815.05	4602.19	4572.78
575	8871.48	8101.59	7868.47	7282.19	6887.91	6400.03	6156.78	5828.15	5643.66	5235.98	5210.74	4483.21	4589.39	4223.8
576	8766.24	8195.19	7207.3	7280.5	6670.79	6264.22	6034.27	5683.18	5498.83	5053.44	4747.95	4626.93	4385.22	4406.28
577	8459.76	7777.51	7391.44	7087.14	6565.83	6251.64	5856.66	5693.39	5345.26	5167.05	4692.48	4531.49	4247.06	4199.74
578	8211.09	7564.8	7169.58	6749.26	6346.3	6091.37	5700.01	5593.24	5237.02	4904.91	4483.93	4510.78	4457.17	4152.32
579	7908.2	7588.55	7179.29	6730.19	6088.39	5968.81	5552.97	5220.22	5165.75	4995.99	4633.65	4379.87	4291.83	3986.35
580	7948.99	7578.41	6924.73	6563.95	6378.02	5744.32	5653.55	5236.12	5117.3	4799.35	4590.42	4404.68	4113.43	4043.65
581	7518.67	7218.74	6702.89	6182.64	6052.8	5477.96	5338.06	5179.11	4731.43	4713.24	4254.85	4075.66	4077	3855.46
582	7660.11	6992.99	6509.02	6311.48	5914.67	5585.88	5260.95	4940.79	4957.37	4503.26	4313.45	4130.55	3933.59	3773.74
583	7293.63	7018.49	6545.11	6056.17	5835.94	5405.85	5010.98	5244.28	4701.38	4558.31	4353.46	4096.41	3849.33	3659.21
584	7335.45	6674.23	6264.26	5753.65	5503.13	5433.03	5020.82	4942.34	4466.69	4317.24	4018.14	3936.16	3820.4	3690.61
585	6922.25	6527.33	6213.34	6172.69	5543.98	5382.21	4992.61	4646.51	4498.16	4142.5	4146.3	3853.86	3823.47	3494.58
586	7071.45	6333.55	6178.15	5765.78	5514.99	4901.09	4841.43	4682.66	4508.44	4247.48	4089.48	3822.12	3571.28	3319.65
587	6969.24	6299.95	6043.16	5691.76	5206.86	5093.71	5112.38	4357.82	4198.47	4009.76	3967.19	3681.51	3498.57	3538.12
588	6753.69	6136.65	6000.71	5443.02	5163.2	5230.58	4920.84	4377.62	4334.92	4104.73	3778.02	3771.66	3385.44	3421.53
589	6646.62	6264.82	5645.67	5486.47	5089.44	4794.86	4490.76	4437.88	4201.23	3895.09	3558.24	3745.44	3414.99	3322.39
590	6689.3	5992.93	5758.79	5236.02	5123.35	4725.12	4558.49	4286.65	4026.12	3859.14	3752.32	3469.24	3433.64	3204.62
591	6499.72	5878.21	5465.57	5126.64	5063.8	4793.37	4514.85	4388.4	4008.31	3750.11	3693.88	3537.62	3217.74	3257.7
592	6333.17	5696.72	5392.94	5277.29	4763.86	4632.28	4443.73	4311.4	4020.34	3884.29	3460.83	3371.92	3315.36	3085.17
593	6023.67	5477.83	5224.59	4927.96	4574.69	4700.5	4175.74	4121.76	3912.42	3522.4	3660.96	3381.51	3422.72	2992.31
594	5881.01	5710.12	5156.89	4896.18	4481.35	4381.46	4027.23	3982.12	3743.47	3532.52	3427.27	3337.92	3108.78	3076.03
595	5645.67	5477	5293.39	4803.96	4470.06	4187.61	4145.75	3777.78	3693.28	3445.18	3252.85	3209.08	2928.24	2911.98
596	5703.46	5281	4962.34	4729.87	4518.93	4166.8	4007.85	3857.79	3469.27	3555.96	3299.77	2960.65	3081.06	2891.69
597	5521.36	5136.08	4833.55	4747.28	4069.43	4240.45	3903.21	3765.15	3565.02	3241.11	3284.84	3014.03	3045.75	2881.38
598	5592.54	5031.27	4714.8	4701.01	4412.24	3924.87	4049.44	3651.29	3584.19	3548.52	3280.45	2969.25	3008.43	2801.23
599	5423.75	4853.28	4845.31	4241.82	4410.77	4030.53	3563.58	3620.56	3361.33	3197.03	3300.29	2877.71	2693.3	2731.76
600	5302.22	4890.41	4576.39	4164.42	4098.83	3942.81	3898.36	3411.46	3408.89	3057.3	2991.73	2740.23	2791.43	2529.49
601	5203.97	4661.19	4447.14	4319.48	4128.51	3928.13	3606.96	3422.69	3144.91	3212.71	3090.86	2833.17	2586.26	2686.31
602	5138.37	4819.25	4712.62	4122.76	4077.52	3879.73	3752.2	3507.32	3111.22	2942.63	2984.93	2682.15	2859.02	2613.92
603	4758.63	4689.33	4308.94	4146.4	3966.04	3559.83	3458.49	3411.99	3153	2874.88	2831.46	2669.25	2613.2	2471.38
604	4873.57	4347.37	4020.45	4171.69	3699.68	3674.61	3340.99	3194.21	3115.33	2972.79	2698.21	2701.66	2598.9	2492.8
605	4470.05	4637.14	4343.94	3852.4	3774.64	3533.53	3317.74	3170.29	3067.81	2943.89	2624.61	2531.22	2557.75	2441.4
606	4506.27	4393.67	4263.77	3737.09	3509.01	3368.1	3126.51	2922.72	2855.88	2822.3	2686.64	2580.9	2481.31	2317.47
607	4432.3	4292.65	4083.51	3789.77	3575.91	3307.68	3075.37	3023.45	2719.38	2835.82	2632.31	2458.88	2456.68	2271.34
608	4381.53	4256.73	3804.98	3730.08	3515.18	3399.75	3238.26	2896.44	2736.97	2584.55	2473.4	2562.42	2406.79	2404.42
609	4411.51	4126.67	3971.31	3585.33	3581.43	3195.25	3214.05	2839.3	2848.15	2623.25	2627.45	2347.26	2221.39	2294.22
610	4293.04	3913.43	3622.9	3488.09	3358.15	3104.15	3066.61	2822.24	2670.85	2683.22	2493.94	2430.69	2315.72	2189.79
611	4122.23	3749.6	3604.12	3355.38	3090.69	3074.07	3078.87	2739.65	2729.8	2507.53	2406.09	2284.18	2373.14	2106.97
612	4014.35	4005.73	3618.09	3422.31	3190.76	2938.1	2915.58	2693.65	2605.59	2596.99	2544.61	2290.26	2312.7	2192.66
613	4147.91	3865.74	3682.37	3321.34	3227.38	3024.78	2776.25	2787.03	2610.43	2487.7	2352.44	2163.64	2189.44	2125.28
614	3882.87	3699.32	3279.68	3282.81	2974.62	2989.41	2674.41	2685.61	2516.13	2314.04	2363.55	2368.76	2223.44	1958.33
615	3652.77	3777.58	3508.4	3154.81	2987.11	2820.64	2816.42	2696.24	2283.34	2402.88	2378.24	2272.93	2211.62	1975.66
616	3584.3	3580.86	3306.82	3257.76	2950.75	2817.49	2699.41	2603.01	2461.83	2459.31	2117.07	2108.91	2021.69	2001.37
617	3565.98	3219.29	3374.36	3233.06	2860.01	2768.85	2613.71	2676.92	2345.49	2116.6	2086.53	2026.14	2028.39	1837.88
618	3578.45	3114.95	3202.11	3239.84	2681.55	2828.63	2556.2	2299.75	2322.89	2242.32	2016.22	1887.38	1916.45	1949.68
619	3371.1	3106.92	3024.23	2948.46	2912.88	2678.77	2415.52	2264.18	2249.64	2162.37	2060.77	1792.97	1858.6	1808.54
620	3389.42	3285.1	2993.21	2983.35	2647.32	2607.58	2296.77	2321.64	2171.35	2231.61	2194.11	1862.75	1675.58	1750.94
621	3349	3139.51	3036.79	2798.49	2463.04	2588.39	2592.31	2286.52	2088.21	2188.8	2078.9	1766.58	1747.28	1677.1
622	3419.94	2995.96	2992.27	2658.13	2785.28	2395.66	2280.24	2395.89	2106.96	2078.69	1936.99	1699.47	1739.74	1683.62
623	3195.37	3129.99	2806.55	2655.14	2650.14	2488.79	2335.04	2361.8	2096.52	2020.44	1916.14	1893.51	1881.9	1675.39
624	3237.35	3027.4	2751.84	2660.05	2504.25	2648.42	2317.45	2150.62	2080.35	1842.3	1936.27	1781.77	1824.49	1669.79
625	2928.49	2759.1	2897.47	2449.69	2498.91	2394.89	2268.86	2118.69	2087.87	1905.55	1912.86	1842.72	1641.53	1590.89
626	3058.33	2960.46	2614.47	2347.01	2342.91	2188.44	2187.67	2164.13	1917.05	2068.17	1768.33	1852.22	1672.34	1566.15
627	3050.93	2799.4	2679.31	2431.04	2395.91	2247.98	2084.04	2176.72	1928.32	2079.89	1849.74	1715.52	1753.35	1599.45
628	2962.45	2852.14	2598.19	2430.15	2435.97	2240.68	2302.03	2045.55	1936.53	1771.38	1739.76	1622.05	1611.14	1551.92
629	2812.33	2407.08	2604.35	2385.05	2207.74	2050.68	2069.44	1938.29	1882.9	1819.65	1653.78	1672.84	1669	1432.88
630	2787.04	2805.11	2599.84	2369.08	2371.61	2231	2084.93	1840.3	1734	1886.06	1689.46	1656.76	1486.34	1563.44
631	2908.71	2616.04	2279.56	2138.7	2282.36	1944.8	1938.57	1924.6	1797.12	1636.2	1591.26	1624.45	1638.94	1348.61
632	2546.77	2412.58	2227.99	2206.45	2277.07	2019.34	1895.85	1740.74	1841.22	1709.31	1457.86	1543.42	1405.09	1393.49
633	2648.81	2372.43	2284.01	2108.82	2007.65	1970.46	1956.91	1757.66	1754.9	1612.77	1476	1512.81	1546	1311.24
634	2484.67	2575	2323.58	2004.41	2096.97	2132.25	1918.92	1843.89	1726.59	1637.46	1465.86	1477.03	1511.09	1387.65
635	2485.03	2465.09	2327.61	2147.76	1932.05	1811.94	1849.44	1691.96	1675.03	1501.34	1510.42	1585.31	1410.59	1205.11
636	2719.53	2365.81	2217.84	2097.46	2074.82	1819.1	1605.3	1760.22	1656.5	1503.01	1460.94	1399.19	1642.8	1486.24
637	2414.27	2315.88	2224.38	2060.09	2018.4	1850.82	1808.38	1645.8	1623.04	1513.76	1632.83	1424.16	1310.1	1300.4
638	2430.26	2066.04	2167.59	2030.03	1893.93	1688.51	1612.74	1559.48	1618.1	1490.85	1310.35	1393.95	1264.05	1237.77
639	2355.61	2248.01	2192.12	1829.67	1782.12	1669.29	1745.74	1521.9	1492.79	1682.85	1349.06	1401.74	1324.54	1221.13
640	2306.87	2256.95	1953.61	1919.15	1938.52	1651.31	1697.36	1343.29	1653.12	1467.99	1418.37	1434.85	1357.48	1303.03
641	2187.72	2107.46	1833.1	1775.78	1667.92	1689.34	1524.49	1541.51	1434.6	1326.77	1339.93	1179.01	1122.74	1123.42
642	2103.94	2167.22	1778.15	1775.41	1587.04	1720.44	1511.98	1635.37	1418.37	1487.59	1335.15	1141.02	1159.69	1165
643	2152.14	2020.51	1939.41	1824.5	1718.88	1787.53	1528.58	1471.3	1418.78	1326.03	1172.75	1204.3	1353.64	1149.88
644	2167.54	1855	1743.9	1761.26	1651.16	1669.35	1511.99	1380.34	1405.42	1298.5	1153.57	1228.46	1223.51	1129.08
645	2146.09	1997.24	1901.7	1741.09	1616.7	1554.62	1551.66	1283.84	1408.52	1285.23	1252.25	1275.72	1129.44	1062.81
646	2078.2	2017.44	1810.7	1537.1	1768.3	1653.29	1559.35	1446.47	1452.42	1234.65	1258.25	1182.3	1189.7	1175.8
647	2001.13	1800.44	1831.97	1694	1651.88	1490.74	1509.86	1454.57	1458.66	1349.61	1355.07	1162.59	1095.12	1056.4
648	1992.78	1850.9	1834.93	1646.29	1642.72	1523.68	1464.49	1586.23	1278.37	1131.36	1105.79	1182.48	969.893	936.599
649	1953.84	1921.24	1805.26	1754.28	1781.72	1449.17	1332.58	1403.78	1421.45	1258.34	1165.45	1214.22	1076.52	1076.07
650	1842.55	1794.64	1679.61	1624.28	1497.71	1476.76	1384.85	1398.02	1411.06	1087.09	1112.3	1042.58	1205.46	1021.38
651	1890.7	1765.83	1668.9	1675.5	1446.96	1481.34	1466.68	1272.59	1336.14	1325.34	1162.11	1181.46	1002.94	1041.65
652	1796.27	1840.13	1576.83	1401.61	1481.39	1300.98	1220.38	1165	1318.57	1278.73	1048.32	1117.05	1077.41	1061.76
653	1799.58	1668.59	1373.33	1437.55	1460.85	1449.76	1191.9	1267.01	1291.58	1134.65	1053.54	1117.81	957.013	916.032
654	1673.46	1835.17	1584.61	1450.95	1492.11	1399.3	1143.11	1319.97	1278.13	1166.28	1115.36	1222.76	982.657	1017.1
655	1751.64	1650.26	1440.4	1461.24	1243.37	1294.61	1242.8	1304.19	1156.96	1116.28	1049.45	982.529	956.49	903.146
656	1579.69	1480.06	1506.82	1319.07	1323.42	1348.64	1218.52	1092.61	1186.1	1055.47	976.682	988.035	918.386	923.392
657	1513.58	1494.94	1513.55	1486.13	1246.71	1285.07	1147.79	1168.19	1056.07	1003.44	1039.37	939.668	922.101	875.85
658	1545.06	1607.58	1312.83	1370.82	1346.06	1251.45	1021.66	1097.03	1089.56	865.722	1061.7	1082.75	1046.03	837.382
659	1578.58	1432.96	1506.1	1198.45	1265.63	1135.86	1092.61	1092.59	993.498	897.579	895.605	815.55	917.256	835.762
660	1553.68	1356.86	1190.45	1310.48	1269.67	1126.95	1039.99	962.44	1123.71	1016.68	1010.2	977.141	910.815	844.415
661	1523.07	1532.01	1457.32	1359.73	1273.93	1078.02	991.486	1194.39	1020.14	917.822	828.897	938.051	837.991	799.353
662	1420.33	1332.66	1244.27	1201.52	1020.56	1112.83	1091.84	872.235	1010.22	905.176	905.436	972.822	837.02	802.941
663	1487.01	1454.92	1174.57	1186.73	1104.77	1025.18	882.717	984.984	961.254	988.75	843.108	972.73	802.53	806.747
664	1392.05	1262.53	1383.3	1344.85	1014.48	980.847	933.777	985.373	842.263	864.734	824.237	744.274	920.873	747.809
665	1562.4	1195.88	1279.33	1065.9	1079.15	986.986	992.582	1072.3	950.164	863.308	904.074	863.011	798.459	640.891
666	1345.34	1076.55	1229.98	1119.7	1044.69	940.365	945.915	985.567	936.626	932.465	745.185	826.555	772.864	860.065
667	1355.98	1189.11	1309.41	1098.07	1194.06	1033.67	1116.15	1050.66	1006.01	872.769	1055.83	860.416	704.758	747.214
668	1284.24	1131.93	1158.58	1231.75	1130.64	865.377	1166.1	895.613	904.877	1033.31	918.758	906.54	671.693	762.498
669	1288.25	1255.39	1295.39	1166.94	1102.76	985.359	894.791	936.52	826.013	803.655	869.509	868.977	680.35	656.831
670	1154.34	1221.5	1145.44	959.372	993.577	1115.78	918.711	880.99	794.344	782.403	916.796	812.879	682.369	657.892
671	1309.39	1254.49	1115.44	1271.59	1068.77	987.276	818.533	843.574	724.391	773.608	660.653	854.565	692.001	728.89
672	1197.2	1053.91	1168.33	1080.6	1178.38	898.765	974.643	867.235	765.82	809.395	883.99	726.954	619.337	606.454
673	1239.47	1207.51	1109.72	992.258	963.547	1007.55	949.443	706.113	807.753	755.844	781.048	782.439	691.724	723.679
674	1122.29	1199.4	1093.32	1070.45	988.7	904.609	981.631	930.408	930.337	993.396	818.185	747.972	629.981	544.81
675	1278.35	1079.88	987.34	1045.68	942.78	1015.34	1034.47	811.218	710.885	776.678	657.635	757.25	704.154	656.593
676	1137.37	1119.84	885.338	1120.06	880.685	827.326	927.779	928.758	859.796	766.808	673.148	726.133	673.109	644.983
677	1146.13	988.426	1037.63	1073.98	872.432	837.814	770.942	777.675	838.038	702.615	641.714	736.085	735.817	728.286
678	1236.42	1071.02	854.364	998.889	872.299	891.553	864.402	836.624	849.574	650.634	713.01	678.029	533.449	608.365
679	1057.01	1093.84	916.815	770.236	836.123	911.124	772.613	890.924	618.877	695.182	612.545	659.627	576.559	637.906
680	971.754	1037.71	854.434	818.439	928.012	833.676	711.049	669.391	509.945	696.738	581.957	731.504	610.065	544.511
681	949.414	1059.88	800.1	968.803	867.555	640.865	618.425	823.244	662.586	684.324	611.278	537.828	472.76	560.06
682	1063.87	1008.2	862.871	768.26	635.499	827.532	819.672	804.595	590.562	597.75	656.761	612.099	626.596	648.116
683	909.578	859.803	890.261	732.946	688.942	689.285	711.557	741.219	755.817	568.908	688.586	598.518	456.03	574.852
684	870.32	759.77	872.135	682.684	585.227	781.952	653.217	676.159	591.637	653.005	538.665	546.733	644.251	507.676
685	1011.31	854.802	862.064	692.677	817.698	708.87	547.525	639.917	477.507	624.09	677.686	639.071	491.865	499.684
686	965.253	781.974	842.197	671.511	648.633	742.042	672.464	594.179	601.156	625.368	594.009	522.764	561.669	498.813
687	970.526	973.014	814.413	791.479	706.161	578.134	704.983	736.88	632.082	657.646	562.122	482.719	466.33	394.923
688	873.71	851.322	898.317	609.631	755.651	779.962	618.031	602.589	640.662	545.783	529.659	553.406	489.168	424.301
689	950.238	888.399	869.904	757.113	733.884	652.504	716.833	595.524	699.256	553.44	602.457	504.8	495.841	446.848
690	794.102	835.903	627.346	750.963	596.21	794.032	711.607	695.886	627.094	544.936	570.481	569.902	626.423	461.716
691	863.008	690.63	636.632	728.553	747.217	720.993	528.615	579.982	603.252	561.252	536.594	460.271	443.763	501.472
692	717.487	835.342	943.477	679.892	544.643	613.017	731.794	528.433	510.046	612.571	628.347	458.752	467.051	424.219
693	703.501	616.243	578.588	621.743	518.049	709.509	569.931	622.052	629.799	500.944	603.317	526.029	491.253	499.366
694	852.119	721.063	771.503	621.736	648.764	789.128	560.814	534.812	525.481	499.436	507.897	595.488	515.775	410.825
695	698.422	749.261	622.488	656.938	569.677	693.403	533.428	569.197	621.666	515.262	480.076	568.815	585.436	496.715
696	752.626	832.382	730.294	747.71	559.676	586.555	613.732	514.541	460.123	495.452	450.902	423.613	486.369	486.006
697	682.321	590.286	630.639	759.219	559.093	769.176	521.951	430.265	457.545	530.488	512.107	502.924	484.404	383.823
698	700.921	699.436	695.702	593.461	697.116	641.543	594.12	538.401	454.473	547.044	445.547	464.112	501.462	426.713
699	729.965	475.973	620.914	536.244	602.882	604.12	621.758	546.603	423.512	527.441	499.195	461.768	367.093	404.984
700	618.581	596.49	706.051	573.131	679.063	526.974	554.834	440.184	372.2	477.591	487.385	372.678	429.429	544.527

## Sheet: Sheet1
Wavelength(nm)	18.8C	22.2C	26.6C	30.95C	35.35C	39.85C	44.25C	48.65C	53.15C	57.35C	61.75C	66.3C	70.65C	75.8C
385	265.361	336.142	287.152	294.292	268.308	267.594	375.307	309.52	274.848	271.966	269.184	289.443	243.582	251.253
386	280.584	308.535	317.254	276.639	305.496	269.075	389.211	286.485	241.106	279.621	230.261	279.428	268.843	235.616
387	272.696	317.864	316.965	292.933	297.592	322.299	354.568	296.007	287.974	255.096	310.518	227.069	273.003	225.67
388	296.887	372.38	349.441	314.872	325.103	276.799	335.426	336.826	307.121	278.695	271.809	300.755	299.005	292.133
389	305.229	303.87	281.953	326.11	291.742	309.606	395.272	343.881	307.899	294.209	304.673	261.433	295.467	305.857
390	264.528	372.036	334.788	353.26	356.159	283.735	390.194	343.228	290.42	325.345	255.182	337.545	302.416	323.731
391	278.35	355.456	307.522	315.746	331.673	338.773	366.879	322.552	314.786	336.506	326.108	299.89	282.283	305.863
392	313.743	336.296	340.811	308.426	349.187	294.897	370.894	347.653	300.677	317.374	305.754	309.864	336.553	288.425
393	316.917	367.571	333.763	322.081	341.732	314.934	425.742	303.899	354.773	289.508	297.184	305.18	296.775	321.619
394	340.023	377.707	322.419	312.258	398.831	352.46	401.213	345.892	338.142	351.927	318.483	329.974	310.195	315.609
395	355.345	390.368	406.017	389.18	374.621	384.678	435.701	353.626	324.399	335.598	349.293	370.931	337.475	355.426
396	398.809	463.227	470.339	374.849	431.668	482.417	445.111	417.173	394.264	412.275	378.516	373.514	350.613	379.33
397	396.915	483.592	456.474	416.258	462.464	414.425	469.541	469.721	402.382	439.29	364.715	368.664	379.598	418.388
398	430.917	563.657	542.375	529.83	509.392	517.415	533.361	452.906	453.677	482.683	439.584	480.74	450.767	412.869
399	566.318	559.965	542.475	555.42	564.479	514.019	561.854	509.76	485.293	506.002	482.533	502.466	491.528	453.486
400	594.848	645.223	600.821	547.133	577.861	596.485	583.111	574.466	553.859	587.431	534.463	521.409	463.793	546.955
401	651.805	721.893	721.159	665.953	661.129	654.454	628.229	618.881	615.768	515.395	594.178	595.836	551.809	528.435
402	848.137	786.906	796.845	696.045	819.416	689.855	723.024	645.899	660.04	659.482	627.264	540.42	642.852	607.362
403	855.1	937.454	867.762	852.212	815.073	774.867	777.441	777.722	729.483	753.674	689.281	699.988	677.245	627.79
404	967.322	1044.88	1011.49	942.964	858.847	942.166	797.837	774.834	824.972	760.986	758.142	761.613	762.11	747.924
405	1171.3	1180.04	1084.06	1040.95	1030.38	987.253	1001.75	944.633	905.232	861.168	859.565	793.902	843.483	770.857
406	1315.22	1399.08	1320.87	1244.21	1136.9	1088	1165.96	1033.09	1073.55	990.005	985.769	911.824	971.964	876.665
407	1529.7	1471.7	1438.72	1374.19	1324.65	1282.86	1272.32	1270.81	1196.66	1061.33	1119.11	1074.79	974.373	993.245
408	1895.74	1800.24	1660.72	1627.58	1522.73	1579.97	1401.8	1414.5	1346.99	1235.73	1269.96	1163.92	1197.51	1170.9
409	2246.67	2133.76	2048.29	1850.61	1860.14	1807.68	1752.86	1725.61	1587.7	1494.44	1461.45	1382.13	1410	1377.59
410	2691.85	2556.99	2522.32	2440.14	2266.39	2123.63	2098.12	2055.75	1921.21	1844.72	1830.22	1833.84	1629.29	1666.84
411	3473.99	3245.96	3121.37	2839.87	2856.91	2621.32	2626.95	2486.34	2391.94	2252.26	2346.59	2110.11	1998.04	2037.5
412	4110.09	3926.32	3800.57	3751.71	3499.98	3226.72	3136.11	3011.38	2952.94	2895.06	2747.97	2672.51	2580.11	2572.52
413	5028.32	4863.85	4631.37	4400.7	4336.92	4115.91	3983.12	3862.66	3713.09	3705.1	3382.29	3439.49	3358.7	3085.67
414	6036.05	5770.84	5590.96	5439.12	5276	5136.29	4815.25	4676.21	4685.62	4440.54	4266.15	4167.79	4111.67	3966.32
415	6982.14	6856.94	6674.48	6200.24	6316.77	5838.19	5590.54	5654.97	5351.12	5181.51	5116.35	5055.36	4846.72	4788.61
416	7896.11	7653.11	7532.05	7030.23	6976.72	6647.83	6553.96	6371.77	6143.92	6024.31	5797.77	5584.22	5471.33	5401.79
417	8524.68	8431.23	8110.81	7872.93	7522.15	7284.85	7034.49	6930.53	6811.86	6604.73	6409.31	6337.6	6179.26	5920.06
418	8848.2	8765.53	8564.07	8358.46	7960.63	7926.06	7629.81	7399.59	7068.91	7046.99	6896.88	6731.17	6605.23	6434.58
419	9317.36	9106.95	8781.21	8372.91	8204.49	7925.69	7688.24	7535.36	7217.28	7029.43	6924.49	6656.71	6687.45	6447.37
420	9527.15	9123.13	8787.49	8346.56	8018.41	8000.75	7724.33	7228.82	7271.34	7079.98	6856.28	6646.22	6354.48	6285.09
421	9476.92	8923.21	8475.01	8129.46	7902.73	7432.61	7235.4	6855.5	6813.18	6690.59	6269.92	6154.61	6046.08	5882.11
422	9283.45	8978.33	8317.08	7837.35	7632.7	7133.66	6887.51	6546.98	6411.93	6207.56	6098.77	5841.37	5576.42	5292.91
423	9509.23	8767.28	8194.28	7865.64	7416.98	6989.01	6647.1	6362.46	5946.44	5708.95	5568.7	5480.26	5028.11	5137.72
424	9639.15	8984.98	8459.77	7799.92	7328.38	6962.11	6647.58	6254.22	6007.28	5817.15	5379.99	5292.97	5008.17	4516.66
425	9956.32	9581.07	8640.77	8100.66	7371.48	7070.93	6903.99	6414.07	6050.12	5659.48	5495.02	5116.29	5005.97	4727.19
426	10779.5	9933.59	9058.03	8418.01	8015.14	7571.57	6969.93	6641.71	6141.96	5870.29	5505.96	5304.33	5047.33	4915.85
427	11409.6	10537.3	9671.58	8968.23	8449.32	7993.46	7276.41	6812.53	6469.4	6161.06	5842.03	5538.25	5442.71	5071.5
428	12229.1	11211.8	10378	9827.22	9045.6	8448.49	7730.29	7646.97	6966.06	6620.27	6142.92	5882.71	5580.49	5168
429	12875.1	11951.5	10919.5	10264.2	9512.35	9066.75	8329.21	7782.63	7290.8	6713.1	6504.4	6112.83	5937.92	5642.85
430	13836	12658.7	11722.9	10915.4	10422.3	9625.66	9015.03	8477.71	7717.18	7406.97	7090.36	6509.01	6041.79	5888.36
431	14692.8	13583.9	12200.8	11439.8	11055.1	10014.9	9308.51	8834.62	8038.54	7869.02	7188.89	6920.81	6674.6	6095.27
432	15567.9	14365.5	13287.7	12177.9	11505.2	10642.6	9968.92	9167.91	8681.54	8296.94	7803.41	7191.75	6853.59	6538.29
433	16408.7	14983.4	13735.8	12889.9	11969.9	11206.6	10414.7	9564.89	9276.93	8580.42	7952.4	7534.06	7215.85	6810.91
434	17400.2	15757.8	14660.1	13564.4	12653.2	11678.7	11180.1	10211.8	9609.8	9085.37	8457.4	8018.15	7605.47	6928.08
435	18174.1	16464.7	15215.9	14317.6	13419.5	12389.1	11336.9	10743.5	10146.8	9496.2	8750.93	8118.63	7917.2	7486.8
436	18991.6	17393.5	16201.4	14991.4	13758.6	12993.6	12033.9	11331.3	10530.4	9878	9290.17	8637.02	8159.12	7893.65
437	19882	18109.6	16640.7	15489.1	14385.8	13673.4	12525.5	11486.9	10764.7	10094.7	9634.51	9031.16	8535.21	8045.48
438	20514.4	19051.9	17567.5	16116.4	15224.6	14006.3	12952.6	12493.5	11361.9	10554.3	10152.6	9542.58	8927.18	8398.76
439	21429.3	19921.9	18011.5	16834.7	15703.1	14729.4	13451.9	12767.6	11806.2	11049	10413.8	10023.3	9016.08	8624.76
440	22369.2	20553.2	19040.9	17496.7	16126.1	15294.3	14180.8	13163	12266.2	11632	10786.6	10078.3	9469.42	9181.04
441	23271	21541.9	19428	18265.5	17063.3	15728.2	14645.2	13611.4	12545.9	11795.6	11236.4	10431.4	9831.72	9366.72
442	24066.4	22444.8	20237.7	18714.1	17334.7	16490.5	15102.1	14002.7	13150	12121.9	11585.1	10960.8	10444.1	9585.67
443	24976.6	22436.8	20897.9	19216.1	18057.6	16836.2	15479.6	14635.8	13684	12663.2	11871.5	11219.2	10794.7	10041.8
444	25441.5	23378.8	21888.5	19596.3	18461.8	17038.4	16163.9	15012.3	13902.9	13313.8	12551.4	11588.9	11019.5	10308.2
445	26454.2	24037.2	22025.7	20287.6	19138.8	17854.2	16483.2	15487	14369.1	13615.5	12671.4	12028.2	11066.8	10666.5
446	27168.1	25044.4	22938.1	21019.7	19896.8	18506.8	17030.2	15882.9	14859.3	14235.4	13131.4	12365	11737.2	10767.2
447	27900.3	25754.4	23595.6	21627.4	20262.6	18966.4	17291.5	16341	15516.7	14486.8	13609.4	12574.3	11994.8	11163.7
448	28581.5	26039.8	24515.4	22205.9	20590.4	19404.4	17874.8	16625.1	15661	14549.4	13809.2	12928.6	12418.4	11605.2
449	29382.8	26967.3	25042.4	22684.9	21485.2	19749.8	18371.5	17190.4	16066.8	15102.6	14324.9	13364.5	12550.6	11821.9
450	30146.1	27323.7	25188.6	22774.2	21730	20095.6	18690	17464.1	16422.9	15405.2	14590.3	13423	12667	12216.2
451	30729.4	28151.8	25929.9	23498.1	21852.2	20136.2	19235.7	18151.9	16706.3	15663.3	14619.7	14178.4	13407.1	12368
452	31151.1	28862.6	26275.4	24397.2	22527.9	20771.4	19597.2	18467.2	17145.2	15768.3	15141	14010.4	13471.1	12779.7
453	31946.8	29612.5	26923.8	24797.3	23273.3	21699.8	20339.9	18679.6	17640.3	16499.9	15353.3	14182	13759.7	12964.8
454	32834.6	29990.3	27470	25466.3	23616.1	22203.9	20423.1	18879	17802.6	16476.8	15615.7	14865.6	14050.5	13212.8
455	32765.1	30358.7	27447.5	26037.9	24167.1	22160.2	20882.6	19191.4	18152.6	16742.6	15691.5	14992.6	14130.8	13569.2
456	33713.3	30974.7	28026.5	26373.4	24455.5	22838.1	20985.4	19503.4	18345.2	17263.3	16322.3	15179.3	14409.1	13567.1
457	34250.3	31126.8	28829	26453.8	24892.4	22935.6	21311.4	19942.4	18666.3	17350	16430.5	15400.7	14666.2	13809
458	34041.2	31560	29192	26823.3	24783.6	23203.1	21723.8	20212.2	18977.8	17605.9	16713	15762.8	14808.3	13633.1
459	35167.7	32040.8	29532.1	27178.2	25547.8	23992.8	22040.1	20517.6	19297.4	17597.1	16809.8	15881.1	14996.2	14046.9
460	35633.4	32486.6	30067.8	27831.5	25921	24030.6	22096.5	20699.8	19654	17915.1	17163.4	15998.6	15218.5	14368.9
461	36082.6	33072.6	30311.6	27964.6	26272.7	24556.3	22374.6	20911.2	19594.5	18442.9	17452.6	16317.8	15291.2	14297
462	36087.3	33079.5	30529.3	28323.1	26316.5	24658.3	22841.6	21496.2	20200.2	18698.9	17442	16739.1	15647.6	14526.7
463	36785.9	33543.2	31301.4	28406.8	26875.5	24588.8	23037.2	21464.8	20120	19145.2	17893.8	16828.1	15713.1	14654
464	36806.6	33956.6	31385.4	28961.9	26829.8	24795.2	23504.3	21809.4	19990.2	19428.3	17808.2	16881.7	15699	15218.8
465	37019	34455.1	31766.5	28695.3	26999.3	25020.6	23574.3	21834.3	20529	19292	18201.5	17142.7	16019.3	15294.7
466	37335.2	34719.5	31854.8	28862.5	27423.2	25422.3	23924.3	22129.2	20671.1	19204.1	18113.5	17102.4	16161.7	14921
467	37679.4	34374.2	31825.5	29445.3	27159.1	25583.6	24035.1	22357	20804.2	19444.9	18684.8	17101.4	16263	15177
468	38106	34873.4	31923.8	29668.5	27776.4	25865.4	23770.8	22535.4	20888.8	19464	18139.1	17192	16072.8	15524
469	37859.7	34592.2	32455.8	29716.9	27725.9	26327.1	23723	22504.9	20902.6	19662.4	18561.5	17689.5	16499	15516.1
470	38180	35143	32336.8	30070	27952.4	26220.9	24233.8	22736.4	20894.3	19548.5	18461.5	17631.9	16759.6	15505.3
471	38130.8	35480.7	32279.7	30104.8	28202.9	26205.5	24225.8	22724.4	21215.1	19963.4	18916	17728.9	16538.2	15705.6
472	38455.3	35832.5	32890.1	30092.4	28624.4	26099.6	24011.7	22941.9	20917.1	19892.5	18849	17644.5	16829.9	15646
473	38837	35438	32675.8	30088.1	28112.9	26116.6	24111.5	23191.2	21118.7	20185.3	19064.4	17744	16855.6	15567.8
474	38097.9	35413.5	32851.3	30463.7	28179	26082.9	24304.1	23067.4	21221.6	20254.6	18558.2	17708.3	16698.9	15771.4
475	38496.6	35148.3	32826.4	29710.9	28301.3	26493.9	24480.4	22812	21556.9	20157.8	19176.4	17598.2	16954.4	15803.6
476	38525.7	35287.2	32771.3	29849.7	28240.2	26173.8	24718.7	23218.3	21459.4	20164.8	19182.4	17657.8	16689.8	15802.4
477	38792	35584	32733.8	30013.6	28237.3	26263	24486.9	22736.8	21418.2	20508	19062.2	17924.6	16562.1	16002.4
478	38174.6	35598.4	32946.1	30401.3	28441.9	26797.1	24699.9	22892.6	21619.2	20305.1	19138.2	17741.5	16953.2	16310.7
479	38475	35828.8	32694.1	29902.6	27955.6	26518.1	24224	23095.6	21433.9	20058.7	19145.8	18011.2	17071.4	15930.3
480	38720.7	35551.3	32494.8	30322.6	28470.3	26265.3	24509.8	23152.3	21259.8	20098.5	19008.6	17944.6	17010.5	15967.2
481	38415.4	35268.2	32509.1	30096	28479.1	26031.8	24599.3	23024.6	21239.4	20192.3	18930.1	17688	16926.8	15732.1
482	38258.1	35144.1	32424.6	30253.3	28102.4	26028.1	24530.3	22376.5	21186.6	19892.9	18936.8	17811.3	16594.2	15913.5
483	38071.2	34719.3	32414	29759.2	27723	26387.7	24001.5	22531.3	21467.2	20071.1	18855.7	18046.7	16513.9	15756.7
484	37954	34572.7	32135.9	29422.9	27792.4	26145.9	24276.6	22475	21043.9	20011.1	18759.4	17611.2	16656	15716.2
485	37595.6	34395.6	31980.8	29623.4	27809.3	25510.5	24613.7	22675.7	21372.6	19763	18809.4	17705.2	16752.9	15722.2
486	37151.4	34357.6	31838.6	29548.8	27687.4	25670.3	24163.8	22492.7	20941.4	19779.8	18680.1	17465.2	16676.9	15749
487	36903.6	34230.3	31677.2	29520.8	27506.8	25594	23872.9	22354.7	21203.2	19344.3	18552.9	17278.4	16794.7	15265.8
488	36774.7	34113.4	31681	28832	27311.9	25178.9	23916.5	22112.5	20776.7	19630	18135.1	17234.5	16085.8	15442.2
489	36602	33502.7	30906	29085.9	27113.2	25024.1	23646.4	21980.5	20727	19230.2	18520.9	16962.7	16153.8	15212.1
490	36296.9	33770.2	30995.1	28338.6	26841.5	25310.8	23480.6	21995	20435.8	19434.7	18150.2	17062.9	16611.2	15216.3
491	36111	33357.7	30747.8	28624.2	26581.8	25072.8	23263.3	21744.1	20467.6	19381.6	18170.3	17166.4	16222.9	15386.2
492	35488	33214.2	30772.6	28455.3	26739.1	24945	23097.3	21816.8	20084.4	18942.7	18055.4	16987.4	15791.8	15172.1
493	36004.9	32571.9	30378.8	28220.3	26735.9	24884.3	23256.4	21795	20003.9	19016.3	17743.6	17002.8	15931.9	15088.5
494	35128.7	32273.6	30101.2	27902.1	25902.5	24611.1	22848.7	21385.1	19733.8	18918.1	17602.6	16586.8	15943.7	15070.7
495	34854.6	32078.5	29763	27709.1	25930	24195.7	22597.8	21456.7	19912.8	18978.2	17882.5	16815.3	15681.5	15021.8
496	34712.2	31946	29786.7	27315.5	25712	23964.9	22396.2	21206.4	19320.9	18488.3	17564	16244.4	15744	14625.5
497	34145	31635	29501.4	26899.4	25493.5	24073.1	22254.9	20437.6	19277.2	18377.8	17345.3	16266.1	15613.6	14547.4
498	34077.7	31039.2	29389.9	26456.2	25020	24136.9	22296.4	20709	19245.1	18459.3	17221.4	16563.7	15347	14677.5
499	33378.5	31501.1	28589.2	26749.7	24928.4	23380.7	21940.9	20605.2	19113.7	18161.7	16999.6	16188.1	15587.6	14316.4
500	33346.7	31037.6	28058.4	26145.3	25152.3	23198.2	21867.6	20194.3	19051.4	17539.4	17105.5	15977	15180.8	14485.1
501	32900.5	30081.5	28096.3	26086.1	24311.8	22861.7	21597.5	20103.5	18636.6	17837.9	16618.9	15677.8	14944.5	14079.1
502	32209	29696.7	28173	25495.8	24171.5	22638.6	21139.9	19965.7	18617.8	17705.6	16866.6	15772.4	14597.9	13954.2
503	32379.9	29741.2	27566.6	25832	24154	22789.6	20671.6	19413.9	18675.2	17656.3	16238.2	15834.1	14696.4	13833.8
504	31846	29536.7	27091.5	25505.8	23644.3	21931.1	20747.9	19435.5	18145.3	17144.8	16106.6	15200.2	14698.8	13673.8
505	31158	28906.1	26640.2	24847.9	23268.1	21616.9	20576.6	19479.5	17995.8	16626.2	15964.3	15231.7	14270.7	13656.3
506	30922.5	28184.5	26740.3	24681.4	23325.3	21819.1	20163.8	19128.8	17765.9	16722.3	15884.8	14773.6	14296.1	13152
507	30595.4	28311.9	26252.8	24086.1	22796.3	21533.3	20062.3	18459.8	17418.5	16419.8	15783.5	14562.9	14029.9	13236.7
508	30162.1	27549.9	26004.5	23980.5	22640.4	21086.6	19791.6	18677.1	17116.5	16370.2	15344.9	14773.3	14052.2	12990.4
509	29938.1	27453.4	25283.2	23928.6	22640.8	20910.7	19377.6	18375.9	17216.6	16265.8	15384.1	14537.9	13654.8	12995.1
510	30165.3	26765.8	25286.2	23105.5	21976.4	20778.9	19398.9	18108.9	17097.5	16270.3	14851.9	14117.4	13615.4	12852.8
511	29116.9	26904.1	24987.3	23122.2	21784.3	20348.9	18829.6	17629.4	16558.7	15651.7	14768.3	14222.3	13210.6	12587.4
512	28947.8	26429.4	24668.5	22437.3	21474.8	20329.1	18426.5	17678.3	16434.7	15585.9	14705.6	13857.6	12972.2	12432.6
513	27744.3	25871.7	24361.7	22305.3	21119.3	19799.8	18589.3	17498	16418.7	15181	14436.9	13663.2	13088.6	12327.2
514	27831.5	25448.6	24400.8	21986	20862.7	19814.1	18340.1	17380	16264.3	15200.3	14580.2	13684.3	13215.1	12385
515	27533.8	25379.8	23411.8	21887.5	20752.5	19304.4	18023	16624.9	16195.8	14855.7	14001.2	13468.4	12784.3	12280.8
516	26974.1	24593.1	23342.4	21417.9	20438.1	18874.6	17699.5	16574.4	15909.8	14899.6	14079.9	13221.8	12283.7	12014.3
517	26728.7	24486.7	23051.8	21313.8	19827.3	18806.4	17681.6	16192.6	15414	14652.2	13708.5	12989.3	12326	11822.6
518	26002.3	24120.2	22383.2	21164.4	19842.6	18208.9	17090.4	16128.2	15346.2	14357	13542.5	12891.7	12271.2	11621.6
519	25284.4	23643.8	21994.1	20651.1	19939	18143.6	17024.9	15932	14811.3	14140	13476.9	12736.6	12050.8	11567.3
520	25175.3	23325.6	22134	20459	19323.7	17831.8	16765.7	15583.3	14796.7	13684.5	13121.1	12667.1	11848.2	11062.8
521	24694.4	22966.4	21542.9	19849	18629.2	17873.7	16298.9	15880.5	14436.6	13824	13172.6	12323	11391.3	11260
522	24525.5	22517.5	21277.4	19597.1	18774.9	17204.2	16023.3	15349.6	14448	13351.3	12939.2	12275.5	11531.7	11028
523	24049	22600.4	20571	19621.2	18090.5	17131.4	15771.4	15031	14227.4	13154.6	12569.4	12097.9	11352.9	10698.6
524	23474.7	22105.6	20487.8	19008.4	18174.6	17030.5	15822.1	14474.3	13928.9	13204.3	12403	11775.2	11340.1	10709.3
525	23381	21537.8	20226.8	18314.4	17541.2	16543.6	15707.2	14634.2	13360.4	12989.6	12359.9	11567.3	10914.4	10688.5
526	22930	21476.8	19788.1	18469.5	17300.9	16242.1	15184.5	14382.8	13572.7	12734.1	12011.6	11341.5	10623.4	10285.7
527	22703.2	20917.5	19571.5	17977	17181.5	16135.8	15257.6	13953.3	13309.1	12687.7	11893.6	11482	10641.9	10153.3
528	22192.6	20491.5	19146	17939.3	16527.9	15625.2	14646.3	13970.8	12840.8	12352.6	11960.5	11236.6	10687.9	10080.5
529	22101.6	20335.2	18765.6	17637.9	16465.7	15143.5	14717.9	13699.3	12818.6	12159.1	11593.7	10561.6	10474.4	10080.9
530	21212.2	20005.4	18435.7	17277.9	15971.4	15183	14379.6	13545.3	12508.2	11776.6	11250.7	10661.2	10185.2	9766.05
531	21218.3	19843.6	18109.1	16887.8	15981.9	15199.8	13965.7	13323.6	12271.1	11943.8	10966.2	10341.7	10264.4	9552.37
532	20124.1	18877.6	17934.1	16267.7	15592.7	14495.7	13809.8	13082.8	12213.6	11825.7	10856.7	10518.7	9776.05	9304.8
533	20231.5	19024.3	17489.6	16268.3	15343.1	14587.6	13404.5	12567	11761.9	11336.4	10659.6	10248.5	9925.9	9128.82
534	20016.2	18420.2	16816.7	15722.9	15197.4	14327.4	13505.6	12378.8	11577.5	11125	10554.3	10068.4	9442.15	9092.12
535	19184.4	18059.6	16571.1	15831	14752.6	14018.7	13107.7	12483.2	11638.8	10931.2	10508.7	9875.91	9352.43	8814.93
536	19153.1	17904.4	16272.1	15377.6	14594.5	13648.6	12953.5	12238.2	11258.4	10849.3	10390.8	9821.73	9019.72	8599.86
537	18741	17206.3	16292.5	15443.4	14309.5	13617.5	12555.2	11723.7	11217.1	10473.2	9904.89	9541.09	8887.64	8698.12
538	18272.6	16915.1	16106.1	15097.1	13817.6	13316	12686.2	11621.3	11172.5	10464.1	10003.9	9326.41	8948.38	8493.26
539	18186.4	16823	15820.9	14429.9	13725	12674.5	12196.3	11600.7	10844.8	10125.5	9535.16	9170.36	8714.22	8244.8
540	17760.1	16303.8	15359	14509.2	13356	12547.9	11919.4	11043.8	10403.7	9877.09	9716.09	9098.4	8593.53	8360.09
541	17516.8	16087.6	15262.1	14142.3	13028.6	12446.7	11680	11029.9	10640.8	9837.55	9072.76	8992.59	8524.58	8009.25
542	17022.3	15852.2	14594.9	13966.3	12827.7	11975.5	11674.8	10751.8	10196.5	9755.63	9281.07	8805.19	8156.29	7992.55
543	16675.5	15569.3	14633	13253.8	12955	12020	11316	10536.8	9994.31	9512.39	9113.7	8651.08	8205	7679.79
544	16474	15374.8	14017.6	13519.5	12786.7	11687.4	10904.5	10538.5	9788.82	9401.77	8881.78	8462.45	8041.34	7673.96
545	15961.3	15105.5	14055.8	12900.8	12303.8	11751.5	10935.5	10127.3	9682.24	8886.48	8622.64	8181.36	7842.08	7505.78
546	16001.7	14745.9	13758.2	12928.6	12342.2	11338.9	10959.1	10184.5	9529.75	9041.46	8689.21	8067.64	7774.09	7574.82
547	15410.3	14367.2	13302.8	12554.7	11653.8	11140.2	10277.1	9910.76	9653.9	8736.06	8228.67	8243.58	7674.13	7295.65
548	15297.8	14037.9	13044.8	12288.5	11566.5	10928.7	10366.6	10032.7	9122.53	8649.52	8298.87	7748.02	7453.9	7284.95
549	15155.3	13988	13109.9	12308.4	11404.6	10944.7	10163.1	9490.27	9145.38	8432.1	8216.86	7620.06	7372.92	7275.2
550	14800.3	13190.5	12852.5	12007.8	11515.9	10704.1	9896.29	9264.74	8806.37	8305.54	8011.59	7439.05	7198.07	6769.59
551	14237.6	13491.8	12141.2	11729	11186.7	10314.2	9815.42	9225.53	8547.74	8218.23	7731.26	7568.44	7146.81	6715.36
552	13769.2	12917.2	12084.5	11381.8	10750.5	10224.8	9618.6	9114.78	8472.84	7712.94	7602.35	7401.24	7036.86	6604.61
553	13895.1	12911.1	12314	11529.8	10510.3	10018.6	9310.66	8742.68	8287.89	7850.74	7605.5	7115.88	6771.91	6685.87
554	13635.3	12672.6	11612.2	11058.4	10403.4	9807.17	9234.71	8842.31	8070.03	7810.45	7450.47	6841.64	6649.27	6438.12
555	13014.3	12546.5	11511.5	10928.8	10202.6	9452.09	9033.57	8465.06	7874.49	7479.26	7349.45	6974.63	6657.74	6159.87
556	13070.4	12029.9	11171.8	10807.2	10043	9413.63	8864.74	8528.93	8173.47	7452.5	7196.65	6867.06	6545.29	5966.48
557	12773.5	11662.5	10862.6	10212.6	9894.33	9123.48	8514.97	8256.26	7745.18	7516.53	6848.58	6553.77	6320.98	6017.83
558	12429.8	11617.6	10759.4	10181.8	9586.54	8877.14	8578.09	8142.81	7604.39	7001.82	6875.38	6519.73	6131.69	5912.06
559	12470.7	11351.1	10630.4	9680.89	9127.02	9287.87	8528.42	7973.48	7366.75	7086.22	6738.94	6459.96	6146.12	5990.05
560	11684.4	10931.2	10324.6	9650.28	9154.12	8698.7	8036.79	7663.67	7424.39	6815.23	6487.78	6183.85	6083.61	5808.21
561	11927.9	10750.6	10392.2	9780.97	8975.43	8479.6	8305.62	7659.38	7039.26	6944.27	6571.63	5935.07	6055.57	5685.15
562	11442.6	10889	9965.53	9396.69	9033.14	8548.89	7898.24	7648.88	7046.95	6763.89	6406.11	5812.63	5730.92	5446.25
563	11128.6	10583.5	9887.11	8880.11	8433.32	8456.33	7780.56	7300.18	6839.52	6449.65	6286.82	5938.78	5670.17	5364.37
564	11162.7	10126	9664.9	8787.33	8576.91	8094.58	7680.41	7068.91	6618.3	6406.06	6079.26	6161.21	5780.72	5246.75
565	10749.1	10248.9	9767.43	8440.17	8500.5	7776.62	7539.39	7107.84	6704	6477.5	6061.07	5859.48	5256.4	5221.01
566	10493.3	9994.21	9243.79	8708.99	8214.82	7856.49	7408.65	6986.02	6529.79	6163.54	6147.88	5725.75	5445.51	5081.99
567	10487.5	9586.82	8927.28	8452.62	8232.31	7382.13	7213.39	6931.2	6471.58	6012.29	5752.6	5616.86	5286.33	4976.22
568	10024.7	9604.81	8786.99	8318.85	8053.03	7611.73	7128.68	6733.16	6110.71	5929.74	5700.14	5383.29	5263.28	4833.84
569	9735.64	9127.93	8926.61	7862.08	7686.23	7092.84	6974.82	6451.36	6338.38	5996.73	5604.46	5121.84	5056.44	4962.62
570	9921.32	8695.44	8466.5	8059.4	7724.48	7074.87	6734.12	6664.34	6039.37	5794.98	5454.27	5225.07	5182.84	4733.89
571	9411.89	9106.95	8581.24	7809.39	7260.79	7043.22	6671.11	6282.5	5800.5	5556.53	5517.97	5072.54	4928.16	4598.16
572	9484.79	8769.34	8309.98	7830.89	7106.3	6742.06	6632.72	6223.06	5855.24	5294.58	5354.37	4890.07	4729.47	4645.84
573	9121.6	8412.24	8153.97	7605.18	7138.02	6818.54	6509.91	5913.12	5528.41	5488.98	5277.07	4844.07	4634.2	4512.88
574	9026.32	8495.02	7830.35	7232.63	6928.26	6689.75	6031.33	5912.04	5603.52	5291.47	5159.62	4815.05	4602.19	4572.78
575	8871.48	8101.59	7868.47	7282.19	6887.91	6400.03	6156.78	5828.15	5643.66	5235.98	5210.74	4483.21	4589.39	4223.8
576	8766.24	8195.19	7207.3	7280.5	6670.79	6264.22	6034.27	5683.18	5498.83	5053.44	4747.95	4626.93	4385.22	4406.28
577	8459.76	7777.51	7391.44	7087.14	6565.83	6251.64	5856.66	5693.39	5345.26	5167.05	4692.48	4531.49	4247.06	4199.74
578	8211.09	7564.8	7169.58	6749.26	6346.3	6091.37	5700.01	5593.24	5237.02	4904.91	4483.93	4510.78	4457.17	4152.32
579	7908.2	7588.55	7179.29	6730.19	6088.39	5968.81	5552.97	5220.22	5165.75	4995.99	4633.65	4379.87	4291.83	3986.35
580	7948.99	7578.41	6924.73	6563.95	6378.02	5744.32	5653.55	5236.12	5117.3	4799.35	4590.42	4404.68	4113.43	4043.65
581	7518.67	7218.74	6702.89	6182.64	6052.8	5477.96	5338.06	5179.11	4731.43	4713.24	4254.85	4075.66	4077	3855.46
582	7660.11	6992.99	6509.02	6311.48	5914.67	5585.88	5260.95	4940.79	4957.37	4503.26	4313.45	4130.55	3933.59	3773.74
583	7293.63	7018.49	6545.11	6056.17	5835.94	5405.85	5010.98	5244.28	4701.38	4558.31	4353.46	4096.41	3849.33	3659.21
584	7335.45	6674.23	6264.26	5753.65	5503.13	5433.03	5020.82	4942.34	4466.69	4317.24	4018.14	3936.16	3820.4	3690.61
585	6922.25	6527.33	6213.34	6172.69	5543.98	5382.21	4992.61	4646.51	4498.16	4142.5	4146.3	3853.86	3823.47	3494.58
586	7071.45	6333.55	6178.15	5765.78	5514.99	4901.09	4841.43	4682.66	4508.44	4247.48	4089.48	3822.12	3571.28	3319.65
587	6969.24	6299.95	6043.16	5691.76	5206.86	5093.71	5112.38	4357.82	4198.47	4009.76	3967.19	3681.51	3498.57	3538.12
588	6753.69	6136.65	6000.71	5443.02	5163.2	5230.58	4920.84	4377.62	4334.92	4104.73	3778.02	3771.66	3385.44	3421.53
589	6646.62	6264.82	5645.67	5486.47	5089.44	4794.86	4490.76	4437.88	4201.23	3895.09	3558.24	3745.44	3414.99	3322.39
590	6689.3	5992.93	5758.79	5236.02	5123.35	4725.12	4558.49	4286.65	4026.12	3859.14	3752.32	3469.24	3433.64	3204.62
591	6499.72	5878.21	5465.57	5126.64	5063.8	4793.37	4514.85	4388.4	4008.31	3750.11	3693.88	3537.62	3217.74	3257.7
592	6333.17	5696.72	5392.94	5277.29	4763.86	4632.28	4443.73	4311.4	4020.34	3884.29	3460.83	3371.92	3315.36	3085.17
593	6023.67	5477.83	5224.59	4927.96	4574.69	4700.5	4175.74	4121.76	3912.42	3522.4	3660.96	3381.51	3422.72	2992.31
594	5881.01	5710.12	5156.89	4896.18	4481.35	4381.46	4027.23	3982.12	3743.47	3532.52	3427.27	3337.92	3108.78	3076.03
595	5645.67	5477	5293.39	4803.96	4470.06	4187.61	4145.75	3777.78	3693.28	3445.18	3252.85	3209.08	2928.24	2911.98
596	5703.46	5281	4962.34	4729.87	4518.93	4166.8	4007.85	3857.79	3469.27	3555.96	3299.77	2960.65	3081.06	2891.69
597	5521.36	5136.08	4833.55	4747.28	4069.43	4240.45	3903.21	3765.15	3565.02	3241.11	3284.84	3014.03	3045.75	2881.38
598	5592.54	5031.27	4714.8	4701.01	4412.24	3924.87	4049.44	3651.29	3584.19	3548.52	3280.45	2969.25	3008.43	2801.23
599	5423.75	4853.28	4845.31	4241.82	4410.77	4030.53	3563.58	3620.56	3361.33	3197.03	3300.29	2877.71	2693.3	2731.76
600	5302.22	4890.41	4576.39	4164.42	4098.83	3942.81	3898.36	3411.46	3408.89	3057.3	2991.73	2740.23	2791.43	2529.49
601	5203.97	4661.19	4447.14	4319.48	4128.51	3928.13	3606.96	3422.69	3144.91	3212.71	3090.86	2833.17	2586.26	2686.31
602	5138.37	4819.25	4712.62	4122.76	4077.52	3879.73	3752.2	3507.32	3111.22	2942.63	2984.93	2682.15	2859.02	2613.92
603	4758.63	4689.33	4308.94	4146.4	3966.04	3559.83	3458.49	3411.99	3153	2874.88	2831.46	2669.25	2613.2	2471.38
604	4873.57	4347.37	4020.45	4171.69	3699.68	3674.61	3340.99	3194.21	3115.33	2972.79	2698.21	2701.66	2598.9	2492.8
605	4470.05	4637.14	4343.94	3852.4	3774.64	3533.53	3317.74	3170.29	3067.81	2943.89	2624.61	2531.22	2557.75	2441.4
606	4506.27	4393.67	4263.77	3737.09	3509.01	3368.1	3126.51	2922.72	2855.88	2822.3	2686.64	2580.9	2481.31	2317.47
607	4432.3	4292.65	4083.51	3789.77	3575.91	3307.68	3075.37	3023.45	2719.38	2835.82	2632.31	2458.88	2456.68	2271.34
608	4381.53	4256.73	3804.98	3730.08	3515.18	3399.75	3238.26	2896.44	2736.97	2584.55	2473.4	2562.42	2406.79	2404.42
609	4411.51	4126.67	3971.31	3585.33	3581.43	3195.25	3214.05	2839.3	2848.15	2623.25	2627.45	2347.26	2221.39	2294.22
610	4293.04	3913.43	3622.9	3488.09	3358.15	3104.15	3066.61	2822.24	2670.85	2683.22	2493.94	2430.69	2315.72	2189.79
611	4122.23	3749.6	3604.12	3355.38	3090.69	3074.07	3078.87	2739.65	2729.8	2507.53	2406.09	2284.18	2373.14	2106.97
612	4014.35	4005.73	3618.09	3422.31	3190.76	2938.1	2915.58	2693.65	2605.59	2596.99	2544.61	2290.26	2312.7	2192.66
613	4147.91	3865.74	3682.37	3321.34	3227.38	3024.78	2776.25	2787.03	2610.43	2487.7	2352.44	2163.64	2189.44	2125.28
614	3882.87	3699.32	3279.68	3282.81	2974.62	2989.41	2674.41	2685.61	2516.13	2314.04	2363.55	2368.76	2223.44	1958.33
615	3652.77	3777.58	3508.4	3154.81	2987.11	2820.64	2816.42	2696.24	2283.34	2402.88	2378.24	2272.93	2211.62	1975.66
616	3584.3	3580.86	3306.82	3257.76	2950.75	2817.49	2699.41	2603.01	2461.83	2459.31	2117.07	2108.91	2021.69	2001.37
617	3565.98	3219.29	3374.36	3233.06	2860.01	2768.85	2613.71	2676.92	2345.49	2116.6	2086.53	2026.14	2028.39	1837.88
618	3578.45	3114.95	3202.11	3239.84	2681.55	2828.63	2556.2	2299.75	2322.89	2242.32	2016.22	1887.38	1916.45	1949.68
619	3371.1	3106.92	3024.23	2948.46	2912.88	2678.77	2415.52	2264.18	2249.64	2162.37	2060.77	1792.97	1858.6	1808.54
620	3389.42	3285.1	2993.21	2983.35	2647.32	2607.58	2296.77	2321.64	2171.35	2231.61	2194.11	1862.75	1675.58	1750.94
621	3349	3139.51	3036.79	2798.49	2463.04	2588.39	2592.31	2286.52	2088.21	2188.8	2078.9	1766.58	1747.28	1677.1
622	3419.94	2995.96	2992.27	2658.13	2785.28	2395.66	2280.24	2395.89	2106.96	2078.69	1936.99	1699.47	1739.74	1683.62
623	3195.37	3129.99	2806.55	2655.14	2650.14	2488.79	2335.04	2361.8	2096.52	2020.44	1916.14	1893.51	1881.9	1675.39
624	3237.35	3027.4	2751.84	2660.05	2504.25	2648.42	2317.45	2150.62	2080.35	1842.3	1936.27	1781.77	1824.49	1669.79
625	2928.49	2759.1	2897.47	2449.69	2498.91	2394.89	2268.86	2118.69	2087.87	1905.55	1912.86	1842.72	1641.53	1590.89
626	3058.33	2960.46	2614.47	2347.01	2342.91	2188.44	2187.67	2164.13	1917.05	2068.17	1768.33	1852.22	1672.34	1566.15
627	3050.93	2799.4	2679.31	2431.04	2395.91	2247.98	2084.04	2176.72	1928.32	2079.89	1849.74	1715.52	1753.35	1599.45
628	2962.45	2852.14	2598.19	2430.15	2435.97	2240.68	2302.03	2045.55	1936.53	1771.38	1739.76	1622.05	1611.14	1551.92
629	2812.33	2407.08	2604.35	2385.05	2207.74	2050.68	2069.44	1938.29	1882.9	1819.65	1653.78	1672.84	1669	1432.88
630	2787.04	2805.11	2599.84	2369.08	2371.61	2231	2084.93	1840.3	1734	1886.06	1689.46	1656.76	1486.34	1563.44
631	2908.71	2616.04	2279.56	2138.7	2282.36	1944.8	1938.57	1924.6	1797.12	1636.2	1591.26	1624.45	1638.94	1348.61
632	2546.77	2412.58	2227.99	2206.45	2277.07	2019.34	1895.85	1740.74	1841.22	1709.31	1457.86	1543.42	1405.09	1393.49
633	2648.81	2372.43	2284.01	2108.82	2007.65	1970.46	1956.91	1757.66	1754.9	1612.77	1476	1512.81	1546	1311.24
634	2484.67	2575	2323.58	2004.41	2096.97	2132.25	1918.92	1843.89	1726.59	1637.46	1465.86	1477.03	1511.09	1387.65
635	2485.03	2465.09	2327.61	2147.76	1932.05	1811.94	1849.44	1691.96	1675.03	1501.34	1510.42	1585.31	1410.59	1205.11
636	2719.53	2365.81	2217.84	2097.46	2074.82	1819.1	1605.3	1760.22	1656.5	1503.01	1460.94	1399.19	1642.8	1486.24
637	2414.27	2315.88	2224.38	2060.09	2018.4	1850.82	1808.38	1645.8	1623.04	1513.76	1632.83	1424.16	1310.1	1300.4
638	2430.26	2066.04	2167.59	2030.03	1893.93	1688.51	1612.74	1559.48	1618.1	1490.85	1310.35	1393.95	1264.05	1237.77
639	2355.61	2248.01	2192.12	1829.67	1782.12	1669.29	1745.74	1521.9	1492.79	1682.85	1349.06	1401.74	1324.54	1221.13
640	2306.87	2256.95	1953.61	1919.15	1938.52	1651.31	1697.36	1343.29	1653.12	1467.99	1418.37	1434.85	1357.48	1303.03
641	2187.72	2107.46	1833.1	1775.78	1667.92	1689.34	1524.49	1541.51	1434.6	1326.77	1339.93	1179.01	1122.74	1123.42
642	2103.94	2167.22	1778.15	1775.41	1587.04	1720.44	1511.98	1635.37	1418.37	1487.59	1335.15	1141.02	1159.69	1165
643	2152.14	2020.51	1939.41	1824.5	1718.88	1787.53	1528.58	1471.3	1418.78	1326.03	1172.75	1204.3	1353.64	1149.88
644	2167.54	1855	1743.9	1761.26	1651.16	1669.35	1511.99	1380.34	1405.42	1298.5	1153.57	1228.46	1223.51	1129.08
645	2146.09	1997.24	1901.7	1741.09	1616.7	1554.62	1551.66	1283.84	1408.52	1285.23	1252.25	1275.72	1129.44	1062.81
646	2078.2	2017.44	1810.7	1537.1	1768.3	1653.29	1559.35	1446.47	1452.42	1234.65	1258.25	1182.3	1189.7	1175.8
647	2001.13	1800.44	1831.97	1694	1651.88	1490.74	1509.86	1454.57	1458.66	1349.61	1355.07	1162.59	1095.12	1056.4
648	1992.78	1850.9	1834.93	1646.29	1642.72	1523.68	1464.49	1586.23	1278.37	1131.36	1105.79	1182.48	969.893	936.599
649	1953.84	1921.24	1805.26	1754.28	1781.72	1449.17	1332.58	1403.78	1421.45	1258.34	1165.45	1214.22	1076.52	1076.07
650	1842.55	1794.64	1679.61	1624.28	1497.71	1476.76	1384.85	1398.02	1411.06	1087.09	1112.3	1042.58	1205.46	1021.38
651	1890.7	1765.83	1668.9	1675.5	1446.96	1481.34	1466.68	1272.59	1336.14	1325.34	1162.11	1181.46	1002.94	1041.65
652	1796.27	1840.13	1576.83	1401.61	1481.39	1300.98	1220.38	1165	1318.57	1278.73	1048.32	1117.05	1077.41	1061.76
653	1799.58	1668.59	1373.33	1437.55	1460.85	1449.76	1191.9	1267.01	1291.58	1134.65	1053.54	1117.81	957.013	916.032
654	1673.46	1835.17	1584.61	1450.95	1492.11	1399.3	1143.11	1319.97	1278.13	1166.28	1115.36	1222.76	982.657	1017.1
655	1751.64	1650.26	1440.4	1461.24	1243.37	1294.61	1242.8	1304.19	1156.96	1116.28	1049.45	982.529	956.49	903.146
656	1579.69	1480.06	1506.82	1319.07	1323.42	1348.64	1218.52	1092.61	1186.1	1055.47	976.682	988.035	918.386	923.392
657	1513.58	1494.94	1513.55	1486.13	1246.71	1285.07	1147.79	1168.19	1056.07	1003.44	1039.37	939.668	922.101	875.85
658	1545.06	1607.58	1312.83	1370.82	1346.06	1251.45	1021.66	1097.03	1089.56	865.722	1061.7	1082.75	1046.03	837.382
659	1578.58	1432.96	1506.1	1198.45	1265.63	1135.86	1092.61	1092.59	993.498	897.579	895.605	815.55	917.256	835.762
660	1553.68	1356.86	1190.45	1310.48	1269.67	1126.95	1039.99	962.44	1123.71	1016.68	1010.2	977.141	910.815	844.415
661	1523.07	1532.01	1457.32	1359.73	1273.93	1078.02	991.486	1194.39	1020.14	917.822	828.897	938.051	837.991	799.353
662	1420.33	1332.66	1244.27	1201.52	1020.56	1112.83	1091.84	872.235	1010.22	905.176	905.436	972.822	837.02	802.941
663	1487.01	1454.92	1174.57	1186.73	1104.77	1025.18	882.717	984.984	961.254	988.75	843.108	972.73	802.53	806.747
664	1392.05	1262.53	1383.3	1344.85	1014.48	980.847	933.777	985.373	842.263	864.734	824.237	744.274	920.873	747.809
665	1562.4	1195.88	1279.33	1065.9	1079.15	986.986	992.582	1072.3	950.164	863.308	904.074	863.011	798.459	640.891
666	1345.34	1076.55	1229.98	1119.7	1044.69	940.365	945.915	985.567	936.626	932.465	745.185	826.555	772.864	860.065
667	1355.98	1189.11	1309.41	1098.07	1194.06	1033.67	1116.15	1050.66	1006.01	872.769	1055.83	860.416	704.758	747.214
668	1284.24	1131.93	1158.58	1231.75	1130.64	865.377	1166.1	895.613	904.877	1033.31	918.758	906.54	671.693	762.498
669	1288.25	1255.39	1295.39	1166.94	1102.76	985.359	894.791	936.52	826.013	803.655	869.509	868.977	680.35	656.831
670	1154.34	1221.5	1145.44	959.372	993.577	1115.78	918.711	880.99	794.344	782.403	916.796	812.879	682.369	657.892
671	1309.39	1254.49	1115.44	1271.59	1068.77	987.276	818.533	843.574	724.391	773.608	660.653	854.565	692.001	728.89
672	1197.2	1053.91	1168.33	1080.6	1178.38	898.765	974.643	867.235	765.82	809.395	883.99	726.954	619.337	606.454
673	1239.47	1207.51	1109.72	992.258	963.547	1007.55	949.443	706.113	807.753	755.844	781.048	782.439	691.724	723.679
674	1122.29	1199.4	1093.32	1070.45	988.7	904.609	981.631	930.408	930.337	993.396	818.185	747.972	629.981	544.81
675	1278.35	1079.88	987.34	1045.68	942.78	1015.34	1034.47	811.218	710.885	776.678	657.635	757.25	704.154	656.593
676	1137.37	1119.84	885.338	1120.06	880.685	827.326	927.779	928.758	859.796	766.808	673.148	726.133	673.109	644.983
677	1146.13	988.426	1037.63	1073.98	872.432	837.814	770.942	777.675	838.038	702.615	641.714	736.085	735.817	728.286
678	1236.42	1071.02	854.364	998.889	872.299	891.553	864.402	836.624	849.574	650.634	713.01	678.029	533.449	608.365
679	1057.01	1093.84	916.815	770.236	836.123	911.124	772.613	890.924	618.877	695.182	612.545	659.627	576.559	637.906
680	971.754	1037.71	854.434	818.439	928.012	833.676	711.049	669.391	509.945	696.738	581.957	731.504	610.065	544.511
681	949.414	1059.88	800.1	968.803	867.555	640.865	618.425	823.244	662.586	684.324	611.278	537.828	472.76	560.06
682	1063.87	1008.2	862.871	768.26	635.499	827.532	819.672	804.595	590.562	597.75	656.761	612.099	626.596	648.116
683	909.578	859.803	890.261	732.946	688.942	689.285	711.557	741.219	755.817	568.908	688.586	598.518	456.03	574.852
684	870.32	759.77	872.135	682.684	585.227	781.952	653.217	676.159	591.637	653.005	538.665	546.733	644.251	507.676
685	1011.31	854.802	862.064	692.677	817.698	708.87	547.525	639.917	477.507	624.09	677.686	639.071	491.865	499.684
686	965.253	781.974	842.197	671.511	648.633	742.042	672.464	594.179	601.156	625.368	594.009	522.764	561.669	498.813
687	970.526	973.014	814.413	791.479	706.161	578.134	704.983	736.88	632.082	657.646	562.122	482.719	466.33	394.923
688	873.71	851.322	898.317	609.631	755.651	779.962	618.031	602.589	640.662	545.783	529.659	553.406	489.168	424.301
689	950.238	888.399	869.904	757.113	733.884	652.504	716.833	595.524	699.256	553.44	602.457	504.8	495.841	446.848
690	794.102	835.903	627.346	750.963	596.21	794.032	711.607	695.886	627.094	544.936	570.481	569.902	626.423	461.716
691	863.008	690.63	636.632	728.553	747.217	720.993	528.615	579.982	603.252	561.252	536.594	460.271	443.763	501.472
692	717.487	835.342	943.477	679.892	544.643	613.017	731.794	528.433	510.046	612.571	628.347	458.752	467.051	424.219
693	703.501	616.243	578.588	621.743	518.049	709.509	569.931	622.052	629.799	500.944	603.317	526.029	491.253	499.366
694	852.119	721.063	771.503	621.736	648.764	789.128	560.814	534.812	525.481	499.436	507.897	595.488	515.775	410.825
695	698.422	749.261	622.488	656.938	569.677	693.403	533.428	569.197	621.666	515.262	480.076	568.815	585.436	496.715
696	752.626	832.382	730.294	747.71	559.676	586.555	613.732	514.541	460.123	495.452	450.902	423.613	486.369	486.006
697	682.321	590.286	630.639	759.219	559.093	769.176	521.951	430.265	457.545	530.488	512.107	502.924	484.404	383.823
698	700.921	699.436	695.702	593.461	697.116	641.543	594.12	538.401	454.473	547.044	445.547	464.112	501.462	426.713
699	729.965	475.973	620.914	536.244	602.882	604.12	621.758	546.603	423.512	527.441	499.195	461.768	367.093	404.984
700	618.581	596.49	706.051	573.131	679.063	526.974	554.834	440.184	372.2	477.591	487.385	372.678	429.429	544.527

## Sheet: Sheet2
Temp ( C )	Fluorescence at 475nm	Fluorescence at 475nm with g3p
18.8	38496.6	43265.1
22.2	35148.3	39884.4
26.6	32826.4	36064
30.95	29710.9	33643.2
35.35	28301.3	30925.1
39.85	26493.9	28659.7
44.25	24480.4	26570.4
48.65	22812	25235.8
53.15	21556.9	23329.9
57.35	20157.8	22041.2
61.75	19176.4	20889.9
66.3	17598.2	19432.8
70.65	16954.4	18321.1
75.8	15803.6	17118.3
Concentrations ?
Temp ( C )	Fluorescence at 475nm	Fluorescence at 475nm with g3p
18.8	384.966	432.651
22.2	351.483	398.844
26.6	328.264	360.64
30.95	297.109	336.432
35.35	283.013	309.251
39.85	264.939	286.597
44.25	244.804	265.704
48.65	228.12	252.358
53.15	215.569	233.299
57.35	201.578	220.412
61.75	191.764	208.899
66.3	175.982	194.328
70.65	169.544	183.211
75.8	158.036	171.183
	15uM daptomycin, 1.67mM calcium chloride, 13.33mM G3P
