# Supplementary material for: Daptomycin forms a stable complex with phosphatidylglycerol for selective uptake to bacterial membrane
Source: eLife. 2025 Jun 2;13:RP93267. doi: 10.7554/eLife.93267 (PMC12129450; doi:10.7554/eLife.93267)
Supplement: Figure 3—source data 1. [file elife-93267-fig3-data1.xlsx]

## Sheet: Sheet1
Time(s)	Dapt only	Dapt+Ca	20.83uM DMPG:166.67uM DMPC	20.83uM Card:166.67uM DMPC	20.83uM POPS:166.67uM DMPC										Time(s)	Dapt only	Dapt+Ca	20.83uM DMPG:166.67uM DMPC	20.83uM Card:166.67uM DMPC	20.83uM POPS:166.67uM DMPC
0	15044.5	13656.9	49761.4	62723.6	19252.7										0	150.445	136.569	497.614	627.236	192.527
1	14980	13647.4	50360.2	62839.5	19244.9										1	149.8	136.474	503.602	628.395	192.449
2	14904.1	13667.5	50923	62688.6	19217.6										2	149.041	136.675	509.23	626.886	192.176
3	14946.6	13729.2	51470.5	62954.1	19297										3	149.466	137.292	514.705	629.541	192.97
4	14938.7	13672.2	51912.1	62728.4	19265										4	149.387	136.722	519.121	627.284	192.65
5	14974.2	13625.6	52293.4	62703.8	19202.4										5	149.742	136.256	522.934	627.038	192.024
6	14972.1	13712.8	52936.9	62761.2	19231.3										6	149.721	137.128	529.369	627.612	192.313
7	14958.3	13649.2	53581.8	62663.3	19183.3										7	149.583	136.492	535.818	626.633	191.833
8	14975.7	13541.9	54003.8	62692.3	19321.1										8	149.757	135.419	540.038	626.923	193.211
9	14907.9	13714	54546.9	62830.7	19098.6										9	149.079	137.14	545.469	628.307	190.986
10	14866.2	13538.2	55124.5	62763.5	19191.1										10	148.662	135.382	551.245	627.635	191.911
11	14832.6	13643	55577.1	62759.4	19295.5										11	148.326	136.43	555.771	627.594	192.955
12	14911.2	13554.5	56199.4	62865	19222.4										12	149.112	135.545	561.994	628.65	192.224
13	14876.7	13583.7	56726.9	62816	19229.4										13	148.767	135.837	567.269	628.16	192.294
14	14909.5	13569.7	57225	62703.9	19094.8										14	149.095	135.697	572.25	627.039	190.948
15	14879.5	13542	57680.7	62734.8	19123.1										15	148.795	135.42	576.807	627.348	191.231
16	14863.9	13570.9	58191.3	62851.4	19145.4										16	148.639	135.709	581.913	628.514	191.454
17	14925.8	13637.4	58897.6	62785.1	19067.4										17	149.258	136.374	588.976	627.851	190.674
18	14980.4	13565.6	59418.7	62811.7	19127.6										18	149.804	135.656	594.187	628.117	191.276
19	14833.7	13508.5	59858.7	62853.1	19095.1										19	148.337	135.085	598.587	628.531	190.951
20	14907.2	13514.8	60485.7	62653.3	19115										20	149.072	135.148	604.857	626.533	191.15
21	14826.7	13566.3	61072.3	62577.3	19083.1										21	148.267	135.663	610.723	625.773	190.831
22	14868.4	13447.4	61513	62638.5	19057.7										22	148.684	134.474	615.13	626.385	190.577
23	14856.8	13499.8	61967.3	62807.7	19108.6										23	148.568	134.998	619.673	628.077	191.086
24	14837.5	13427.8	62498.4	62688.9	19172.3										24	148.375	134.278	624.984	626.889	191.723
25	14879.6	13397.7	62958.3	62789.8	19079										25	148.796	133.977	629.583	627.898	190.79
26	14892.4	13412.9	63654.7	62894.4	19088.6										26	148.924	134.129	636.547	628.944	190.886
27	14791.4	13429.2	64119.7	62815.6	19081.4										27	147.914	134.292	641.197	628.156	190.814
28	14829.5	13433	64577.4	62766.5	19068.9										28	148.295	134.33	645.774	627.665	190.689
29	14850.1	13482.3	65128.9	62762.7	19079.5										29	148.501	134.823	651.289	627.627	190.795
30	14868	13457.3	65511.4	62864.2	19078.3										30	148.68	134.573	655.114	628.642	190.783
31	14897.2	13402.4	66309.6	62729.6	19128.8										31	148.972	134.024	663.096	627.296	191.288
32	14853.8	13374.7	66706.8	62851	19015.8										32	148.538	133.747	667.068	628.51	190.158
33	14865	13429.7	67279.7	62758.8	19050.6										33	148.65	134.297	672.797	627.588	190.506
34	14905.7	13403.7	67906.9	62564	19059.5										34	149.057	134.037	679.069	625.64	190.595
35	14772.1	13441	68300.9	62720.5	18972.9										35	147.721	134.41	683.009	627.205	189.729
36	14769.1	13406.1	68731.5	62676.4	18968.9										36	147.691	134.061	687.315	626.764	189.689
37	14853.2	13372.5	69453.1	62847.4	18981.8										37	148.532	133.725	694.531	628.474	189.818
38	14833.2	13387	69946.9	62756.5	19060										38	148.332	133.87	699.469	627.565	190.6
39	14716.5	13299.4	70691.2	62655.7	19012.8										39	147.165	132.994	706.912	626.557	190.128
40	14771.1	13334.4	71236.9	62602.5	18873.6										40	147.711	133.344	712.369	626.025	188.736
41	14800.4	13385.3	71523.8	62885.8	18909.7										41	148.004	133.853	715.238	628.858	189.097
42	14883.5	13310.3	72401.7	62639.8	18945.4										42	148.835	133.103	724.017	626.398	189.454
43	14800.8	13440	72765.2	62701.5	18928.2										43	148.008	134.4	727.652	627.015	189.282
44	14848.5	13362.6	73476.3	62551.3	18885.7										44	148.485	133.626	734.763	625.513	188.857
45	14834.9	13320.2	73731.8	62796.4	18999.2										45	148.349	133.202	737.318	627.964	189.992
46	14822.8	13320.1	74666.9	62604	18921.1										46	148.228	133.201	746.669	626.04	189.211
47	14871.4	13318.1	75082.8	62708.5	18848.8										47	148.714	133.181	750.828	627.085	188.488
48	14709.9	13332.7	75710	62663.6	19016.8										48	147.099	133.327	757.1	626.636	190.168
49	14812.4	13360.7	76459.3	62689.9	18909.8										49	148.124	133.607	764.593	626.899	189.098
50	14837.2	13343.7	76944.2	62697.6	18924.8										50	148.372	133.437	769.442	626.976	189.248
51	14796.9	13338.9	77678.6	62635.2	18875.7										51	147.969	133.389	776.786	626.352	188.757
52	14790.9	13339.2	78155.8	62519.7	18874.5										52	147.909	133.392	781.558	625.197	188.745
53	14791.5	13261.3	78886.4	62597.4	18912.2										53	147.915	132.613	788.864	625.974	189.122
54	14785	13316.2	79538.5	62554.2	18854.2										54	147.85	133.162	795.385	625.542	188.542
55	14758	13343.1	80022.6	62587.2	18795.3										55	147.58	133.431	800.226	625.872	187.953
56	14814.7	13367.9	80780	62626.2	18844.2										56	148.147	133.679	807.8	626.262	188.442
57	14803.8	13393.7	81406.5	62768.7	18768.7										57	148.038	133.937	814.065	627.687	187.687
58	14773	13209	82016.2	62702.4	18832.1										58	147.73	132.09	820.162	627.024	188.321
59	14814.6	13294.6	82607.3	62549.9	18851.7										59	148.146	132.946	826.073	625.499	188.517
60	14700.6	13316.2	83243.5	62703.3	18859.6										60	147.006	133.162	832.435	627.033	188.596
61	14765.9	13318.3	84080.5	62438.1	18835.7										61	147.659	133.183	840.805	624.381	188.357
62	14715.5	13314.7	84829.2	62497.2	18852.8										62	147.155	133.147	848.292	624.972	188.528
63	14802	13242.7	85470.2	62635.4	18871.7										63	148.02	132.427	854.702	626.354	188.717
64	14841.1	13281.4	85953.5	62428.3	18693.6										64	148.411	132.814	859.535	624.283	186.936
65	14816.9	13311.9	86940.1	62491.1	18842.5										65	148.169	133.119	869.401	624.911	188.425
66	14764.8	13276.9	87739	62503.2	18816.6										66	147.648	132.769	877.39	625.032	188.166
67	14790.9	13224.9	88174.3	62423.4	18821.1										67	147.909	132.249	881.743	624.234	188.211
68	14828.2	13247.8	89046.7	62311.3	18817.1										68	148.282	132.478	890.467	623.113	188.171
69	14708.1	13228.3	89566.3	62506.9	18687.6										69	147.081	132.283	895.663	625.069	186.876
70	14748.6	13246.8	90545.3	62620.2	18753.2										70	147.486	132.468	905.453	626.202	187.532
71	14785.1	13296.5	91285.4	62457.7	18639.3										71	147.851	132.965	912.854	624.577	186.393
72	14740.8	13202.2	91959.5	62565.9	18806.8										72	147.408	132.022	919.595	625.659	188.068
73	14787.6	13221.6	92700.3	62312.2	18806.2										73	147.876	132.216	927.003	623.122	188.062
74	14729	13260.7	93385.4	62502.2	18828.1										74	147.29	132.607	933.854	625.022	188.281
75	14739.1	13283	94249.7	62365	18767.9										75	147.391	132.83	942.497	623.65	187.679
76	14699.2	13247.3	94900.2	62413.7	18818.1										76	146.992	132.473	949.003	624.137	188.181
77	14759.3	13235.1	95698.2	62362.9	18761.5										77	147.593	132.351	956.982	623.629	187.615
78	14737.2	13232.5	96424.3	62346.6	18741.2										78	147.372	132.325	964.243	623.466	187.412
79	14770.7	13247.3	97191.3	62433.3	18884.7										79	147.707	132.473	971.913	624.333	188.847
80	14748	13319.4	98156.4	62356.4	18782										80	147.48	133.194	981.564	623.564	187.82
81	14785.9	13210.2	98849	62455	18793.5										81	147.859	132.102	988.49	624.55	187.935
82	14756.8	13212.7	99501.8	62407.1	18811.5										82	147.568	132.127	995.018	624.071	188.115
83	14684.2	13230.7	100198	62303.6	18759.8										83	146.842	132.307	1001.98	623.036	187.598
84	14754.6	13271.1	101265	62359.6	18765.8										84	147.546	132.711	1012.65	623.596	187.658
85	14778.1	13192.4	101729	62265.3	18801.9										85	147.781	131.924	1017.29	622.653	188.019
86	14742.4	13203.8	102793	62322.7	18757.5										86	147.424	132.038	1027.93	623.227	187.575
87	14717.4	13172.5	103517	62250.9	18802.2										87	147.174	131.725	1035.17	622.509	188.022
88	14733.7	13189.1	104250	62454.2	18805										88	147.337	131.891	1042.5	624.542	188.05
89	14721.3	13203.2	105019	62438.6	18863.8										89	147.213	132.032	1050.19	624.386	188.638
90	14727.3	13194.2	105604	62232.9	18835.1										90	147.273	131.942	1056.04	622.329	188.351
91	14718.5	13253.7	106452	62402	18876.9										91	147.185	132.537	1064.52	624.02	188.769
92	14723.7	13153.2	107270	62431.2	18785.1										92	147.237	131.532	1072.7	624.312	187.851
93	14763.5	13243.6	107940	62318.1	18727.1										93	147.635	132.436	1079.4	623.181	187.271
94	14713.6	13168.1	108903	62360.5	18824.5										94	147.136	131.681	1089.03	623.605	188.245
95	14737.3	13236.5	109723	62395.9	18861.4										95	147.373	132.365	1097.23	623.959	188.614
96	14732.4	13164.8	110340	62200.9	18815										96	147.324	131.648	1103.4	622.009	188.15
97	14749.9	13146.4	110951	62347.4	18871										97	147.499	131.464	1109.51	623.474	188.71
98	14762.7	13196.5	111715	62077.8	18862										98	147.627	131.965	1117.15	620.778	188.62
99	14745.2	13188.4	112531	62418.2	18829.6										99	147.452	131.884	1125.31	624.182	188.296
100	14745.4	13242.9	113415	62255.3	18870.6										100	147.454	132.429	1134.15	622.553	188.706
101	14732.6	13206.5	114024	62349	18877										101	147.326	132.065	1140.24	623.49	188.77
102	14664	13210.3	115108	62372	18908										102	146.64	132.103	1151.08	623.72	189.08
103	14743.9	13182.4	115733	62250.3	18815.7										103	147.439	131.824	1157.33	622.503	188.157
104	14784.7	13196.6	116477	62245.4	18816.4										104	147.847	131.966	1164.77	622.454	188.164
105	14737.9	13161.7	117075	62322.8	18789.6										105	147.379	131.617	1170.75	623.228	187.896
106	14705	13197.4	117941	62286.3	18861.3										106	147.05	131.974	1179.41	622.863	188.613
107	14763.4	13237.5	118640	62286.8	18802.4										107	147.634	132.375	1186.4	622.868	188.024
108	14707.7	13191	119251	61961.6	18788.4										108	147.077	131.91	1192.51	619.616	187.884
109	14733.7	13218.5	120121	62119.7	18885.8										109	147.337	132.185	1201.21	621.197	188.858
110	14738	13200.5	120692	61927.7	18867.5										110	147.38	132.005	1206.92	619.277	188.675
111	14703.3	13166.6	121666	62091	18826.4										111	147.033	131.666	1216.66	620.91	188.264
112	14685	13168.9	122273	62065.9	18890.6										112	146.85	131.689	1222.73	620.659	188.906
113	14708.5	13157.7	122934	62058.3	18905.1										113	147.085	131.577	1229.34	620.583	189.051
114	14705.3	13195.2	123513	62012	18867.6										114	147.053	131.952	1235.13	620.12	188.676
115	14664	13175.4	124402	61949.3	18961.2										115	146.64	131.754	1244.02	619.493	189.612
116	14815.8	13120.3	125163	61850.8	18924.3										116	148.158	131.203	1251.63	618.508	189.243
117	14706	13208.6	125739	61972.5	18853.4										117	147.06	132.086	1257.39	619.725	188.534
118	14777.8	13247	126497	61958.1	18893.8										118	147.778	132.47	1264.97	619.581	188.938
119	14782.7	13206.5	127288	61998.6	18806.7										119	147.827	132.065	1272.88	619.986	188.067
120	14733.7	13150.7	127734	62011.1	19014.3										120	147.337	131.507	1277.34	620.111	190.143
121	14708.4	13212.6	128537	62039.6	18855.5										121	147.084	132.126	1285.37	620.396	188.555
122	14734	13261.2	129145	61941.6	18869.8										122	147.34	132.612	1291.45	619.416	188.698
123	14704.5	13162.1	129567	61954.2	18885.1										123	147.045	131.621	1295.67	619.542	188.851
124	14681.2	13095.7	130542	62022.3	18908.1										124	146.812	130.957	1305.42	620.223	189.081
125	14673.2	13220.2	131223	61978.1	18924.5										125	146.732	132.202	1312.23	619.781	189.245
126	14652	13261.9	131713	61929.1	18952.2										126	146.52	132.619	1317.13	619.291	189.522
127	14797.4	13221.7	132422	61866.1	18958.4										127	147.974	132.217	1324.22	618.661	189.584
128	14729.8	13205.7	133030	61933.6	18926.4										128	147.298	132.057	1330.3	619.336	189.264
129	14658.4	13145.1	133805	61974.9	18920.1										129	146.584	131.451	1338.05	619.749	189.201
130	14681	13203.7	134402	61780.7	19071.4										130	146.81	132.037	1344.02	617.807	190.714
131	14785.3	13126.2	134947	61890.7	18940.4										131	147.853	131.262	1349.47	618.907	189.404
132	14706.6	13148.5	135776	61969.1	19012.5										132	147.066	131.485	1357.76	619.691	190.125
133	14675.1	13114.7	136473	61877.7	18966.7										133	146.751	131.147	1364.73	618.777	189.667
134	14741.9	13148.7	136925	61875.4	19074.5										134	147.419	131.487	1369.25	618.754	190.745
135	14752.4	13187.8	137595	61845.2	19073										135	147.524	131.878	1375.95	618.452	190.73
136	14699	13171.6	138414	61715.1	19001.2										136	146.99	131.716	1384.14	617.151	190.012
137	14627.9	13177.2	139041	61864.8	18952.6										137	146.279	131.772	1390.41	618.648	189.526
138	14695.8	13123.8	139872	61948.9	19006.9										138	146.958	131.238	1398.72	619.489	190.069
139	14697	13180.8	140030	61703.5	19115.2										139	146.97	131.808	1400.3	617.035	191.152
140	14620.7	13209.4	140663	61997.3	19090.3										140	146.207	132.094	1406.63	619.973	190.903
141	14684	13119.6	141235	61855.2	19092.1										141	146.84	131.196	1412.35	618.552	190.921
142	14624.1	13120.5	141949	61843.8	19146										142	146.241	131.205	1419.49	618.438	191.46
143	14725.7	13183.3	142451	61939.5	19024										143	147.257	131.833	1424.51	619.395	190.24
144	14734.9	13147.4	143057	61920.9	19027.8										144	147.349	131.474	1430.57	619.209	190.278
145	14647.3	13161.9	143752	61881.3	19144.9										145	146.473	131.619	1437.52	618.813	191.449
146	14728.1	13132.7	144341	61960.4	19032.7										146	147.281	131.327	1443.41	619.604	190.327
147	14674.2	13167.1	144827	61781.4	19115										147	146.742	131.671	1448.27	617.814	191.15
148	14715.5	13150.1	145392	61763	19083.9										148	147.155	131.501	1453.92	617.63	190.839
149	14705.9	13218.3	146323	61672.9	19086.5										149	147.059	132.183	1463.23	616.729	190.865
150	14663.7	13211.2	146462	61977.8	19120.3										150	146.637	132.112	1464.62	619.778	191.203
151	14679.9	13207	147294	61754.3	19011.1										151	146.799	132.07	1472.94	617.543	190.111
152	14707.7	13226.9	147985	61829	19242.3										152	147.077	132.269	1479.85	618.29	192.423
153	14596.5	13142.1	148257	61747.6	19175.4										153	145.965	131.421	1482.57	617.476	191.754
154	14714.1	13143.5	148957	61953.3	19228										154	147.141	131.435	1489.57	619.533	192.28
155	14696.2	13151.2	149360	61814.2	19149.6										155	146.962	131.512	1493.6	618.142	191.496
156	14598.9	13127.1	150150	61875.1	19185.9										156	145.989	131.271	1501.5	618.751	191.859
157	14717.7	13096.9	150529	61903	19242.2										157	147.177	130.969	1505.29	619.03	192.422
158	14658.8	13105.5	151061	61725.5	19164.7										158	146.588	131.055	1510.61	617.255	191.647
159	14651.6	13160.6	151767	61778.7	19212.3										159	146.516	131.606	1517.67	617.787	192.123
160	14656.1	13080.6	152080	61856.1	19252.3										160	146.561	130.806	1520.8	618.561	192.523
161	14655.1	13115.7	152668	61887	19233.5										161	146.551	131.157	1526.68	618.87	192.335
162	14682.2	13121.7	153335	61758.2	19203.9										162	146.822	131.217	1533.35	617.582	192.039
163	14782.4	13094.7	153402	61914.6	19189.1										163	147.824	130.947	1534.02	619.146	191.891
164	14624.5	13167.5	154166	61818.1	19233.6										164	146.245	131.675	1541.66	618.181	192.336
165	14658.8	13190.1	154556	61790.1	19164.5										165	146.588	131.901	1545.56	617.901	191.645
166	14682.2	13119.4	155057	61835.7	19277.5										166	146.822	131.194	1550.57	618.357	192.775
167	14735.4	13176.9	155485	61853.9	19299.4										167	147.354	131.769	1554.85	618.539	192.994
168	14709.3	13101.5	156028	61754.6	19212.1										168	147.093	131.015	1560.29	617.546	192.121
169	14660.4	13084.3	156639	61607.2	19341										169	146.604	130.843	1566.39	616.072	193.41
170	14626.5	13167.2	157128	61717.1	19355.1										170	146.265	131.672	1571.28	617.171	193.551
171	14713.9	13070.2	157557	61933	19242										171	147.139	130.702	1575.57	619.33	192.42
172	14671.4	13122.7	158056	61697.2	19370.6										172	146.714	131.227	1580.56	616.972	193.706
173	14697.6	13148.9	158592	61751.2	19331.6										173	146.976	131.489	1585.92	617.512	193.316
174	14638	13243.2	159266	61772	19371.5										174	146.38	132.432	1592.66	617.72	193.715
175	14632.7	13144.5	159514	61618.3	19421.5										175	146.327	131.445	1595.14	616.183	194.215
176	14650.8	13148.9	159906	61729.9	19379.2										176	146.508	131.489	1599.06	617.299	193.792
177	14674.7	13237.5	160610	61631.4	19397.9										177	146.747	132.375	1606.1	616.314	193.979
178	14684.3	13114.8	160771	61799.7	19458.1										178	146.843	131.148	1607.71	617.997	194.581
179	14653.9	13230.4	161166	61762.4	19444.9										179	146.539	132.304	1611.66	617.624	194.449
180	14597.7	13115.6	161995	61661.2	19446.2										180	145.977	131.156	1619.95	616.612	194.462
181	14629.9	13163.1	162079	61731	19437.3										181	146.299	131.631	1620.79	617.31	194.373
182	14611.8	13156.5	162401	61702.6	19402.3										182	146.118	131.565	1624.01	617.026	194.023
183	14634.1	13029.1	162752	61829.2	19422.2										183	146.341	130.291	1627.52	618.292	194.222
184	14703.6	13160.4	163354	61926.6	19457.8										184	147.036	131.604	1633.54	619.266	194.578
185	14693.8	13138.6	163932	61686.8	19438.9										185	146.938	131.386	1639.32	616.868	194.389
186	14669.2	13136.5	164389	61668.3	19529.6										186	146.692	131.365	1643.89	616.683	195.296
187	14682.2	13075.1	164758	61731.3	19496.5										187	146.822	130.751	1647.58	617.313	194.965
188	14673.1	13144	165353	61823.6	19449.3										188	146.731	131.44	1653.53	618.236	194.493
189	14667.2	13105.7	165791	61797.1	19476.3										189	146.672	131.057	1657.91	617.971	194.763
190	14567.1	13061.9	165994	61853.7	19494.5										190	145.671	130.619	1659.94	618.537	194.945
191	14665.5	13165.7	166614	61867.3	19444										191	146.655	131.657	1666.14	618.673	194.44
192	14600.9	13146.9	166998	61901.5	19564.4										192	146.009	131.469	1669.98	619.015	195.644
193	14701	13145.2	167335	61725.7	19528.5										193	147.01	131.452	1673.35	617.257	195.285
194	14594.5	13171.2	167767	61830.3	19527.6										194	145.945	131.712	1677.67	618.303	195.276
195	14628.5	13168.9	168378	61819.8	19580.9										195	146.285	131.689	1683.78	618.198	195.809
196	14648.6	13086.9	168424	61702.6	19636.8										196	146.486	130.869	1684.24	617.026	196.368
197	14668.1	13134	168724	61872.5	19573.6										197	146.681	131.34	1687.24	618.725	195.736
198	14639	13075.6	168819	61637.3	19561.1										198	146.39	130.756	1688.19	616.373	195.611
199	14607.1	13134.1	169623	61801.4	19480.7										199	146.071	131.341	1696.23	618.014	194.807
200	14621	13170.9	169961	61697.1	19525.4										200	146.21	131.709	1699.61	616.971	195.254
201	14715.1	13078.5	170393	61766	19627.6										201	147.151	130.785	1703.93	617.66	196.276
202	14594.9	13126.6	170576	61757.1	19516.4										202	145.949	131.266	1705.76	617.571	195.164
203	14687.5	13065.8	170798	61789.6	19637										203	146.875	130.658	1707.98	617.896	196.37
204	14712.2	13149.3	171200	61859.3	19556.8										204	147.122	131.493	1712	618.593	195.568
205	14621.6	13158	171718	61798.2	19650.5										205	146.216	131.58	1717.18	617.982	196.505
206	14594.1	13103.6	172072	61738.4	19750.1										206	145.941	131.036	1720.72	617.384	197.501
207	14616.5	13149.8	171982	61718.9	19702										207	146.165	131.498	1719.82	617.189	197.02
208	14582.7	13157.7	172726	61744.2	19703.4										208	145.827	131.577	1727.26	617.442	197.034
209	14604.3	13090.5	173154	61710.6	19663.4										209	146.043	130.905	1731.54	617.106	196.634
210	14594.9	13111.6	173379	61806	19687.1										210	145.949	131.116	1733.79	618.06	196.871
211	14673.4	13138.1	173832	61647.7	19695.1										211	146.734	131.381	1738.32	616.477	196.951
212	14616.8	13125.3	174267	61708.9	19750.2										212	146.168	131.253	1742.67	617.089	197.502
213	14682.5	13148.5	174522	61593	19692.2										213	146.825	131.485	1745.22	615.93	196.922
214	14679.2	13178.6	174538	61787.4	19691.3										214	146.792	131.786	1745.38	617.874	196.913
215	14586.7	13124.3	174935	61629.9	19750.5										215	145.867	131.243	1749.35	616.299	197.505
216	14599	13117.9	175581	61793.3	19746.3										216	145.99	131.179	1755.81	617.933	197.463
217	14532.3	13123.8	175786	61552.7	19704.6										217	145.323	131.238	1757.86	615.527	197.046
218	14579.5	13113.1	176064	61662.9	19754										218	145.795	131.131	1760.64	616.629	197.54
219	14592.9	13122.8	176426	61771.5	19822.7										219	145.929	131.228	1764.26	617.715	198.227
220	14600.3	13171.7	176617	61723.1	19832.1										220	146.003	131.717	1766.17	617.231	198.321
221	14583.8	13076.5	177010	61779	19824.7										221	145.838	130.765	1770.1	617.79	198.247
222	14636.6	13097.7	177311	61865.6	19846.1										222	146.366	130.977	1773.11	618.656	198.461
223	14591.3	13037.6	177356	61741.1	19801.6										223	145.913	130.376	1773.56	617.411	198.016
224	14625.3	13110.9	177893	61790.5	19874.8										224	146.253	131.109	1778.93	617.905	198.748
225	14658.6	13087.1	178220	61627.4	19862.7										225	146.586	130.871	1782.2	616.274	198.627
226	14633.6	13115.2	178393	61647.8	19889.2										226	146.336	131.152	1783.93	616.478	198.892
227	14564	13100.6	178657	61757.8	19861										227	145.64	131.006	1786.57	617.578	198.61
228	14621.5	13100.1	179358	61810.2	19891										228	146.215	131.001	1793.58	618.102	198.91
229	14664.5	13064.2	179410	61670.1	19820.8										229	146.645	130.642	1794.1	616.701	198.208
230	14592.2	13034.5	179674	61693.5	19927.3										230	145.922	130.345	1796.74	616.935	199.273
231	14633.1	13032.6	179675	61625	19887.5										231	146.331	130.326	1796.75	616.25	198.875
232	14718.7	13148.2	180249	61640.8	19889.3										232	147.187	131.482	1802.49	616.408	198.893
233	14582.1	13117.6	180376	61681.4	19934.3										233	145.821	131.176	1803.76	616.814	199.343
234	14641.6	13086.8	180731	61668.8	19872.9										234	146.416	130.868	1807.31	616.688	198.729
235	14630.3	13122.4	180764	61713.5	19934.5										235	146.303	131.224	1807.64	617.135	199.345
236	14551	13134.6	181217	61741.5	19938.5										236	145.51	131.346	1812.17	617.415	199.385
237	14645.5	13061.6	181587	61602.1	19961.5										237	146.455	130.616	1815.87	616.021	199.615
238	14585.4	13028.8	181741	61716.8	19933.2										238	145.854	130.288	1817.41	617.168	199.332
239	14600.5	13072.7	181843	61620.8	19959.3										239	146.005	130.727	1818.43	616.208	199.593
240	14645.5	13040.3	182035	61672.9	19943.2										240	146.455	130.403	1820.35	616.729	199.432
241	14616	13124.6	182481	61551.1	20013										241	146.16	131.246	1824.81	615.511	200.13
242	14597.5	13068.8	182618	61666.8	20037.3										242	145.975	130.688	1826.18	616.668	200.373
243	14655.1	13107.6	182709	61672.3	20049.1										243	146.551	131.076	1827.09	616.723	200.491
244	14626.9	13092.7	183111	61609.2	20007.8										244	146.269	130.927	1831.11	616.092	200.078
245	14607.4	13033.7	183648	61727.8	20052.1										245	146.074	130.337	1836.48	617.278	200.521
246	14658.7	13166.1	183782	61748.7	20067.4										246	146.587	131.661	1837.82	617.487	200.674
247	14665	13159.3	184039	61673.2	20091.8										247	146.65	131.593	1840.39	616.732	200.918
248	14588	13078.9	184277	61784.8	20132.3										248	145.88	130.789	1842.77	617.848	201.323
249	14583.2	13148.6	184314	61674.1	20133.8										249	145.832	131.486	1843.14	616.741	201.338
250	14538.2	13102.3	184787	61675.2	20202										250	145.382	131.023	1847.87	616.752	202.02
251	14648.1	13107.8	184797	61656.5	20095.5										251	146.481	131.078	1847.97	616.565	200.955
252	14602.2	13063.8	184969	61618.6	20222.1										252	146.022	130.638	1849.69	616.186	202.221
253	14571.5	13121.1	185386	61591.5	20057.2										253	145.715	131.211	1853.86	615.915	200.572
254	14571.9	13085.3	185859	61700.7	20116.2										254	145.719	130.853	1858.59	617.007	201.162
255	14594.1	13136.1	185952	61673	20184.7										255	145.941	131.361	1859.52	616.73	201.847
256	14646.1	13085.4	186233	61611.6	20221.3										256	146.461	130.854	1862.33	616.116	202.213
257	14612.9	13164	186412	61597.8	20252.9										257	146.129	131.64	1864.12	615.978	202.529
258	14572.8	13146.8	186694	61507.4	20233.1										258	145.728	131.468	1866.94	615.074	202.331
259	14666.9	13102	186856	61733.4	20235.7										259	146.669	131.02	1868.56	617.334	202.357
260	14595	13136.3	187013	61512.7	20284										260	145.95	131.363	1870.13	615.127	202.84
261	14623.7	13105.1	187171	61455.5	20271.1										261	146.237	131.051	1871.71	614.555	202.711
262	14604.3	13138.2	187318	61684.5	20194.8										262	146.043	131.382	1873.18	616.845	201.948
263	14606.8	13061	187673	61624.7	20358.3										263	146.068	130.61	1876.73	616.247	203.583
264	14620.7	13073.5	188071	61566.6	20314.1										264	146.207	130.735	1880.71	615.666	203.141
265	14579.5	13019	187851	61741.5	20272.9										265	145.795	130.19	1878.51	617.415	202.729
266	14638.4	13075.2	188112	61572.7	20247.9										266	146.384	130.752	1881.12	615.727	202.479
267	14632.3	13068	188570	61544.1	20350.4										267	146.323	130.68	1885.7	615.441	203.504
268	14608.8	13154.4	188685	61685	20262.4										268	146.088	131.544	1886.85	616.85	202.624
269	14606.6	13093.8	188897	61389	20283.5										269	146.066	130.938	1888.97	613.89	202.835
270	14622	13020.8	188953	61706.8	20342.5										270	146.22	130.208	1889.53	617.068	203.425
271	14661.4	13063.6	189047	61686.3	20374.4										271	146.614	130.636	1890.47	616.863	203.744
272	14641.9	13099.4	189353	61735.9	20350.1										272	146.419	130.994	1893.53	617.359	203.501
273	14577.9	13124.7	189829	61535.8	20335.1										273	145.779	131.247	1898.29	615.358	203.351
274	14589.1	13057.7	189976	61491.6	20258.2										274	145.891	130.577	1899.76	614.916	202.582
275	14576.3	13160.8	190107	61650.8	20458.5										275	145.763	131.608	1901.07	616.508	204.585
276	14535	13081.4	190276	61733.1	20394.1										276	145.35	130.814	1902.76	617.331	203.941
277	14616.1	13123.3	190357	61491	20398.3										277	146.161	131.233	1903.57	614.91	203.983
278	14580.7	13126.7	190796	61541.9	20395.8										278	145.807	131.267	1907.96	615.419	203.958
279	14618.1	13124.6	190659	61669.1	20406.3										279	146.181	131.246	1906.59	616.691	204.063
280	14640.4	13108.5	190850	61704.8	20451.3										280	146.404	131.085	1908.5	617.048	204.513
281	14542.4	13055.5	191089	61638.1	20501.9										281	145.424	130.555	1910.89	616.381	205.019
282	14636.6	13153.9	191373	61589.1	20408.2										282	146.366	131.539	1913.73	615.891	204.082
283	14564	13047.9	191711	61554.8	20486.4										283	145.64	130.479	1917.11	615.548	204.864
284	14614.2	13080.9	191728	61634.6	20502.6										284	146.142	130.809	1917.28	616.346	205.026
285	14542.6	13095.7	191983	61453	20476.5										285	145.426	130.957	1919.83	614.53	204.765
286	14590.8	13137.1	191922	61473	20518										286	145.908	131.371	1919.22	614.73	205.18
287	14543.7	13096	192023	61504.7	20573.9										287	145.437	130.96	1920.23	615.047	205.739
288	14666.4	13054.3	192254	61575.1	20572.1										288	146.664	130.543	1922.54	615.751	205.721
289	14581.2	13143.7	192550	61575.5	20590.7										289	145.812	131.437	1925.49	615.755	205.907
290	14573.4	13093.4	192527	61673.6	20543.3										290	145.734	130.934	1925.27	616.736	205.433
291	14581	13103.1	192457	61673.9	20481.1										291	145.81	131.031	1924.57	616.739	204.811
292	14634.6	13045.6	192868	61576.5	20479.8										292	146.346	130.456	1928.68	615.765	204.798
293	14628.7	13086.5	193412	61653.9	20594.1										293	146.287	130.865	1934.12	616.539	205.941
294	14725.9	13016	193365	61558.9	20511.4										294	147.259	130.16	1933.65	615.589	205.114
295	14621.8	13077.4	193377	61599.1	20647.1										295	146.218	130.774	1933.77	615.991	206.471
296	14629.4	13115.2	193825	61578.5	20607										296	146.294	131.152	1938.25	615.785	206.07
297	14581.9	13054.2	193823	61577.5	20667.4										297	145.819	130.542	1938.23	615.775	206.674
298	14648.4	13065.3	193984	61494.1	20685.2										298	146.484	130.653	1939.84	614.941	206.852
299	14535.7	13084.8	193977	61341.1	20593.8										299	145.357	130.848	1939.77	613.411	205.938
300	14567.2	13148.9	194229	61519.5	20654.8										300	145.672	131.489	1942.29	615.195	206.548
301	14616.7	13056.8	194390	61396.4	20576.1										301	146.167	130.568	1943.9	613.964	205.761
302	14515.7	13137.4	194554	61424.3	20623										302	145.157	131.374	1945.54	614.243	206.23
303	14581.2	13108.8	194613	61382.2	20723.8										303	145.812	131.088	1946.13	613.822	207.238
304	14586.7	13089.1	194917	61504.9	20671.5										304	145.867	130.891	1949.17	615.049	206.715
305	14546	13163.5	194984	61666.1	20704.6										305	145.46	131.635	1949.84	616.661	207.046
306	14600.3	13114	195138	61554.1	20699.8										306	146.003	131.14	1951.38	615.541	206.998
307	14522.3	13108.7	195475	61301.4	20715.6										307	145.223	131.087	1954.75	613.014	207.156
308	14566	13056.9	195710	61458.7	20845.5										308	145.66	130.569	1957.1	614.587	208.455
309	14573.8	13087.5	195643	61419.6	20665.9										309	145.738	130.875	1956.43	614.196	206.659
310	14553.2	13015.8	195803	61398.4	20848.4										310	145.532	130.158	1958.03	613.984	208.484
311	14561	13197.4	195924	61393.2	20812.7										311	145.61	131.974	1959.24	613.932	208.127
312	14659.5	13117.6	196157	61410.2	20701.8										312	146.595	131.176	1961.57	614.102	207.018
313	14580.2	13032	196418	61410.7	20882.1										313	145.802	130.32	1964.18	614.107	208.821
314	14534.1	13000.3	196259	61407.5	20694.1										314	145.341	130.003	1962.59	614.075	206.941
315	14595.8	13074.6	196580	61514.3	20804.2										315	145.958	130.746	1965.8	615.143	208.042
316	14570.7	13116.7	196580	61550.6	20763.4										316	145.707	131.167	1965.8	615.506	207.634
317	14562.2	13109.3	196770	61356	20820.7										317	145.622	131.093	1967.7	613.56	208.207
318	14574.6	13135.7	196786	61472.1	20897										318	145.746	131.357	1967.86	614.721	208.97
319	14547.4	13106.8	197228	61587.2	20822.3										319	145.474	131.068	1972.28	615.872	208.223
320	14612.4	13095.9	196959	61541.4	20718.7										320	146.124	130.959	1969.59	615.414	207.187
321	14571	13137.9	197323	61415.6	20848.4										321	145.71	131.379	1973.23	614.156	208.484
322	14562	13011.7	197380	61509.4	20927.2										322	145.62	130.117	1973.8	615.094	209.272
323	14552.9	13083.9	197366	61445.9	20835.4										323	145.529	130.839	1973.66	614.459	208.354
324	14538.8	13131.5	197731	61368.6	20884.2										324	145.387	131.315	1977.31	613.686	208.842
325	14609.7	13039.9	197995	61491.6	20840.5										325	146.097	130.399	1979.95	614.916	208.405
326	14550.1	13054.5	198011	61415	20828.9										326	145.501	130.545	1980.11	614.15	208.289
327	14681.3	13090.8	198263	61399	20846.2										327	146.813	130.908	1982.63	613.99	208.462
328	14648.5	13089.7	198067	61352.8	20789.8										328	146.485	130.897	1980.67	613.528	207.898
329	14536.9	13192.9	198337	61325.3	20902.2										329	145.369	131.929	1983.37	613.253	209.022
330	14545.1	13080.7	198930	61367.9	20938										330	145.451	130.807	1989.3	613.679	209.38
331	14563.8	13034.6	198802	61355.3	20787.7										331	145.638	130.346	1988.02	613.553	207.877
332	14596.8	13060	198852	61628.5	20837.7										332	145.968	130.6	1988.52	616.285	208.377
333	14589.3	13075.9	198880	61343.6	20907.7										333	145.893	130.759	1988.8	613.436	209.077
334	14649.9	13078.1	199088	61461.7	20926.6										334	146.499	130.781	1990.88	614.617	209.266
335	14512.9	12979.3	199355	61388.3	20965.4										335	145.129	129.793	1993.55	613.883	209.654
336	14557.8	13104.3	199400	61477.1	20951.9										336	145.578	131.043	1994	614.771	209.519
337	14522.3	13049.6	199788	61430.1	20981.2										337	145.223	130.496	1997.88	614.301	209.812
338	14534.7	13071.7	199571	61532.5	20907										338	145.347	130.717	1995.71	615.325	209.07
339	14594.4	13028.5	199930	61546.6	21017.8										339	145.944	130.285	1999.3	615.466	210.178
340	14551.4	13044.9	199861	61445.4	20922.2										340	145.514	130.449	1998.61	614.454	209.222
341	14505.3	13092.8	200063	61436.6	20912.7										341	145.053	130.928	2000.63	614.366	209.127
342	14510.8	13018.9	200037	61322	20967.7										342	145.108	130.189	2000.37	613.22	209.677
343	14535.9	13039	200309	61503.2	20996										343	145.359	130.39	2003.09	615.032	209.96
344	14573.9	13081.4	200294	61428	21095.6										344	145.739	130.814	2002.94	614.28	210.956
345	14509.9	13046.5	200611	61476.9	21036.5										345	145.099	130.465	2006.11	614.769	210.365
346	14563.1	13139.4	200765	61276	20904.9										346	145.631	131.394	2007.65	612.76	209.049
347	14580.9	13054.3	200831	61357.4	20970.4										347	145.809	130.543	2008.31	613.574	209.704
348	14540.5	13064.6	201022	61398.3	21067.8										348	145.405	130.646	2010.22	613.983	210.678
349	14554	13166.1	200919	61450.8	21074.5										349	145.54	131.661	2009.19	614.508	210.745
350	14555.8	13088.7	201027	61270	21032.6										350	145.558	130.887	2010.27	612.7	210.326
351	14523.4	13079.6	201106	61378.5	21029.7										351	145.234	130.796	2011.06	613.785	210.297
352	14522.8	13024.6	201405	61241	21020.5										352	145.228	130.246	2014.05	612.41	210.205
353	14581.3	13070.5	201791	61231.2	21040										353	145.813	130.705	2017.91	612.312	210.4
354	14503	13025.4	201448	61282	21146.1										354	145.03	130.254	2014.48	612.82	211.461
355	14535.6	13061.4	201741	61433.6	21050.8										355	145.356	130.614	2017.41	614.336	210.508
356	14576.1	13048.3	201731	61348.4	20994.6										356	145.761	130.483	2017.31	613.484	209.946
357	14558.6	13084.7	202060	61390.2	21078.8										357	145.586	130.847	2020.6	613.902	210.788
358	14594	13131.7	202159	61362.6	21123.5										358	145.94	131.317	2021.59	613.626	211.235
359	14486	13100.3	202276	61212.4	21088.9										359	144.86	131.003	2022.77	612.124	210.889
360	14555.2	12978.8	202396	61451	21134.5										360	145.552	129.788	2023.96	614.51	211.345
361	14529.4	13029	202552	61390.6	21103										361	145.294	130.29	2025.52	613.906	211.03
362	14560	13090.3	202423	61286	21123.4										362	145.6	130.903	2024.23	612.86	211.234
363	14573.2	13054	202684	61235.3	21131.1										363	145.732	130.54	2026.84	612.353	211.311
364	14509	13080.8	202752	61497.1	21148.1										364	145.09	130.808	2027.52	614.971	211.481
365	14481.8	13136.6	202729	61234.4	21198.1										365	144.818	131.366	2027.29	612.344	211.981
366	14549.4	13085.1	203040	61166.7	21128										366	145.494	130.851	2030.4	611.667	211.28
367	14595.6	13057.6	202882	61305.8	21196.8										367	145.956	130.576	2028.82	613.058	211.968
368	14640.7	13021.8	203268	61311.6	21178.1										368	146.407	130.218	2032.68	613.116	211.781
369	14514.3	13089.1	203267	61348.1	21121.1										369	145.143	130.891	2032.67	613.481	211.211
370	14586.1	13049.8	203211	61322.4	21154.1										370	145.861	130.498	2032.11	613.224	211.541
371	14527.9	13032.8	203427	61260.3	21254.8										371	145.279	130.328	2034.27	612.603	212.548
372	14571	13130.4	204095	61185.3	21272.2										372	145.71	131.304	2040.95	611.853	212.722
373	14552.6	13102.4	203797	61353	21174.7										373	145.526	131.024	2037.97	613.53	211.747
374	14516.9	13040.3	203695	61344	21197.5										374	145.169	130.403	2036.95	613.44	211.975
375	14575.8	13134.7	203923	61319.8	21093.6										375	145.758	131.347	2039.23	613.198	210.936
376	14579	13052.1	203918	61266.2	21310										376	145.79	130.521	2039.18	612.662	213.1
377	14549.3	13124.1	204186	61280.9	21254.8										377	145.493	131.241	2041.86	612.809	212.548
378	14617.7	13037.5	204301	61404.6	21254.3										378	146.177	130.375	2043.01	614.046	212.543
379	14620.3	13049.8	204325	61284.6	21111.7										379	146.203	130.498	2043.25	612.846	211.117
380	14481.2	13108.9	204411	61244.8	21140.6										380	144.812	131.089	2044.11	612.448	211.406
381	14490.2	13069.7	204602	61213.3	21265.5										381	144.902	130.697	2046.02	612.133	212.655
382	14609.6	13054.8	204467	61327.1	21227.4										382	146.096	130.548	2044.67	613.271	212.274
383	14613.8	13085	205109	61226.2	21247.9										383	146.138	130.85	2051.09	612.262	212.479
384	14595.3	13017.5	205090	61296.3	21336.6										384	145.953	130.175	2050.9	612.963	213.366
385	14562.1	13013.9	205096	61174.5	21161.2										385	145.621	130.139	2050.96	611.745	211.612
386	14639.8	13123.2	205070	61382	21300.3										386	146.398	131.232	2050.7	613.82	213.003
387	14461.6	13126	205314	61235.8	21244.5										387	144.616	131.26	2053.14	612.357	212.445
388	14500.1	13097.8	205106	61072.6	21183.1										388	145.001	130.978	2051.06	610.726	211.831
389	14537.2	13023.9	205502	61161.6	21290.2										389	145.372	130.239	2055.02	611.616	212.902
390	14561	13029	205595	61160.9	21353.6										390	145.61	130.29	2055.95	611.609	213.536
391	14569	13076.9	205605	61183.6	21232.4										391	145.69	130.769	2056.05	611.836	212.324
392	14508.9	13052.4	205864	61173.5	21313.9										392	145.089	130.524	2058.64	611.735	213.139
393	14529	13079.7	205809	61242.4	21294.9										393	145.29	130.797	2058.09	612.424	212.949
394	14547.6	13040.5	205673	61204.5	21339.1										394	145.476	130.405	2056.73	612.045	213.391
395	14546.8	13057.8	205844	61197	21349										395	145.468	130.578	2058.44	611.97	213.49
396	14527.3	13051.9	206483	61193.1	21318.3										396	145.273	130.519	2064.83	611.931	213.183
397	14442.5	13075.9	206381	61014.7	21282.9										397	144.425	130.759	2063.81	610.147	212.829
398	14503.1	13066.7	206364	61240.8	21432.9										398	145.031	130.667	2063.64	612.408	214.329
399	14570.7	13040.3	206451	61357.9	21345.8										399	145.707	130.403	2064.51	613.579	213.458
400	14520.4	13049.7	206390	61132.1	21322										400	145.204	130.497	2063.9	611.321	213.22
401	14515.1	13081.5	206725	61269.1	21311.2										401	145.151	130.815	2067.25	612.691	213.112
402	14549.1	13038.5	206863	61345.7	21435.3										402	145.491	130.385	2068.63	613.457	214.353
403	14466.7	13086.5	206787	61119	21365.3										403	144.667	130.865	2067.87	611.19	213.653
404	14573.9	13094.2	206836	61241.1	21429.6										404	145.739	130.942	2068.36	612.411	214.296
405	14514.2	13039.8	206983	61031.2	21383.1										405	145.142	130.398	2069.83	610.312	213.831
406	14574.7	13093.6	207260	61216	21344.1										406	145.747	130.936	2072.6	612.16	213.441
407	14532.4	13052.3	207191	61083.3	21389.7										407	145.324	130.523	2071.91	610.833	213.897
408	14529.4	13051.1	207348	61345.2	21396										408	145.294	130.511	2073.48	613.452	213.96
409	14578.4	13078.2	207426	61075.8	21373.8										409	145.784	130.782	2074.26	610.758	213.738
410	14558.3	13019.2	207402	61077.6	21416.3										410	145.583	130.192	2074.02	610.776	214.163
411	14612.9	13110.8	207558	61268.6	21380.1										411	146.129	131.108	2075.58	612.686	213.801
412	14559.6	13085.6	207407	61394	21342.8										412	145.596	130.856	2074.07	613.94	213.428
413	14624.4	13038.4	207912	61042.9	21364.3										413	146.244	130.384	2079.12	610.429	213.643
414	14496.8	13061.3	207724	61182.1	21445.5										414	144.968	130.613	2077.24	611.821	214.455
415	14530.3	13051.3	207880	61219.8	21369.2										415	145.303	130.513	2078.8	612.198	213.692
416	14537.2	13036.8	208041	60961.7	21395.4										416	145.372	130.368	2080.41	609.617	213.954
417	14535.7	13049.7	208101	61115.7	21494.3										417	145.357	130.497	2081.01	611.157	214.943
418	14524.1	13070.5	208318	61147.7	21367.8										418	145.241	130.705	2083.18	611.477	213.678
419	14522.4	13020	208550	61071	21425.6										419	145.224	130.2	2085.5	610.71	214.256
420	14542.9	13070	208481	61213.1	21398.4										420	145.429	130.7	2084.81	612.131	213.984
421	14555.1	13129.9	208509	61008.4	21441.5										421	145.551	131.299	2085.09	610.084	214.415
422	14535.2	13064.6	208455	61178.9	21441.4										422	145.352	130.646	2084.55	611.789	214.414
423	14525.1	13051.5	208343	61033.4	21458.1										423	145.251	130.515	2083.43	610.334	214.581
424	14539	13057.4	208777	60958.9	21376.1										424	145.39	130.574	2087.77	609.589	213.761
425	14528.4	13065.6	208638	61134	21366.9										425	145.284	130.656	2086.38	611.34	213.669
426	14519.3	13020.1	208513	60923.8	21453.6										426	145.193	130.201	2085.13	609.238	214.536
427	14561	13014.4	208799	61087.5	21447.4										427	145.61	130.144	2087.99	610.875	214.474
428	14496.8	13071.5	208995	61176.5	21490										428	144.968	130.715	2089.95	611.765	214.9
429	14558.3	13055.1	209076	61070.1	21435.5										429	145.583	130.551	2090.76	610.701	214.355
430	14510.3	13081.4	209393	61273.4	21462.6										430	145.103	130.814	2093.93	612.734	214.626
431	14607.9	13054.8	209067	61214.2	21353.1										431	146.079	130.548	2090.67	612.142	213.531
432	14610.8	13050.7	209350	61205	21481.8										432	146.108	130.507	2093.5	612.05	214.818
433	14485.6	13104.8	209462	61105.4	21467.1										433	144.856	131.048	2094.61	611.054	214.671
434	14529	12969.3	209784	61127.8	21478.8										434	145.29	129.693	2097.84	611.278	214.788
435	14463.7	13059.7	209575	61188.2	21503.1										435	144.637	130.597	2095.75	611.882	215.031
436	14575.2	13038.7	209773	61062.1	21494.1										436	145.752	130.387	2097.73	610.621	214.941
437	14572.5	13053.2	209634	61114.4	21557.2										437	145.725	130.532	2096.34	611.144	215.572
438	14628.9	13035.3	209673	61167.6	21517.1										438	146.289	130.353	2096.73	611.676	215.171
439	14556.8	13055.6	209994	61216.5	21546.2										439	145.568	130.556	2099.94	612.165	215.462
440	14497.5	13083.6	210207	61079.4	21512.6										440	144.975	130.836	2102.07	610.794	215.126
441	14486	13039.3	210152	60962.4	21520										441	144.86	130.393	2101.52	609.624	215.2
442	14520.5	13085.1	210101	61021.8	21561.5										442	145.205	130.851	2101.01	610.218	215.615
443	14468.5	13071.1	210144	61231.6	21522.5										443	144.685	130.711	2101.44	612.316	215.225
444	14594.5	13108.9	210282	61167.3	21586.4										444	145.945	131.089	2102.82	611.673	215.864
445	14499	13074.4	210324	61172.5	21621.1										445	144.99	130.744	2103.24	611.725	216.211
446	14498	13069.9	210423	61065.9	21615.9										446	144.98	130.699	2104.23	610.659	216.159
447	14512.1	13025.8	210612	61015.8	21501.9										447	145.121	130.258	2106.12	610.158	215.019
448	14564.8	13058.3	210414	61031	21632.7										448	145.648	130.583	2104.14	610.31	216.327
449	14427.3	13043.1	210754	61082.1	21580.5										449	144.273	130.431	2107.54	610.821	215.805
450	14495.2	13141.8	210674	60841.9	21543.4										450	144.952	131.418	2106.74	608.419	215.434
451	14450	13080.1	210893	61091	21689.9										451	144.5	130.801	2108.93	610.91	216.899
452	14511.8	13085.3	210967	60957.3	21515.7										452	145.118	130.853	2109.67	609.573	215.157
453	14501.9	12968.6	211198	61220.8	21566.7										453	145.019	129.686	2111.98	612.208	215.667
454	14542.8	13079.6	210976	61054.9	21590.9										454	145.428	130.796	2109.76	610.549	215.909
455	14596.2	13102.7	211275	60996.4	21670.3										455	145.962	131.027	2112.75	609.964	216.703
456	14484.7	13013.4	210966	60845.1	21576.1										456	144.847	130.134	2109.66	608.451	215.761
457	14459.4	13133.7	211053	60945.2	21474.1										457	144.594	131.337	2110.53	609.452	214.741
458	14506.4	13050.9	211312	61012.5	21618.3										458	145.064	130.509	2113.12	610.125	216.183
459	14519.8	13046.9	211567	60923.7	21674.8										459	145.198	130.469	2115.67	609.237	216.748
460	14513.9	13009.2	211356	61042.5	21552.9										460	145.139	130.092	2113.56	610.425	215.529
461	14540.6	13076.8	211235	61092.3	21696.5										461	145.406	130.768	2112.35	610.923	216.965
462	14500.9	13093.9	211520	60963.9	21547										462	145.009	130.939	2115.2	609.639	215.47
463	14538	13048.4	211791	61163.7	21602.6										463	145.38	130.484	2117.91	611.637	216.026
464	14482.6	13056.3	211887	61034.3	21655.9										464	144.826	130.563	2118.87	610.343	216.559
465	14509.8	13014.7	211834	60854.6	21612.3										465	145.098	130.147	2118.34	608.546	216.123
466	14492.9	13074	211891	60898.5	21672.7										466	144.929	130.74	2118.91	608.985	216.727
467	14476.2	13036.5	212036	61014.6	21606.5										467	144.762	130.365	2120.36	610.146	216.065
468	14495.3	13034.6	212194	60955.1	21653.3										468	144.953	130.346	2121.94	609.551	216.533
469	14456.3	13086.7	212043	60870.9	21690.1										469	144.563	130.867	2120.43	608.709	216.901
470	14559.2	13081.4	212066	60827.1	21597.4										470	145.592	130.814	2120.66	608.271	215.974
471	14459.1	13067.6	212229	61000.1	21631.3										471	144.591	130.676	2122.29	610.001	216.313
472	14522.8	12994	212575	60948.4	21760.6										472	145.228	129.94	2125.75	609.484	217.606
473	14526.1	13033.3	212736	61020.1	21620.3										473	145.261	130.333	2127.36	610.201	216.203
474	14481.5	13107.5	212775	60868.4	21687.5										474	144.815	131.075	2127.75	608.684	216.875
475	14547.2	13035.8	212447	61012.1	21717.7										475	145.472	130.358	2124.47	610.121	217.177
476	14555.3	13093.2	212659	61017.5	21745.3										476	145.553	130.932	2126.59	610.175	217.453
477	14500.6	13062.9	212774	60998.5	21758										477	145.006	130.629	2127.74	609.985	217.58
478	14560.4	13145.8	212729	61079.6	21751.8										478	145.604	131.458	2127.29	610.796	217.518
479	14459.5	13012.2	212935	61005.7	21690										479	144.595	130.122	2129.35	610.057	216.9
480	14530.9	13027.2	213024	60913.7	21668.3										480	145.309	130.272	2130.24	609.137	216.683
481	14540	13076.9	213186	60883.7	21668.6										481	145.4	130.769	2131.86	608.837	216.686
482	14525.9	13030.3	213177	60909.6	21593.6										482	145.259	130.303	2131.77	609.096	215.936
483	14501.2	12988.2	213332	60907.7	21769.4										483	145.012	129.882	2133.32	609.077	217.694
484	14508.3	13046.3	213044	60945.4	21648.1										484	145.083	130.463	2130.44	609.454	216.481
485	14490.5	13025.9	213367	60885.7	21698.4										485	144.905	130.259	2133.67	608.857	216.984
486	14503	13072.2	213298	61004	21670										486	145.03	130.722	2132.98	610.04	216.7
487	14493.2	13065.9	213244	60863.5	21794.2										487	144.932	130.659	2132.44	608.635	217.942
488	14499.9	13083.1	213736	60817	21733.2										488	144.999	130.831	2137.36	608.17	217.332
489	14563.1	13064.2	213488	60938.2	21768.1										489	145.631	130.642	2134.88	609.382	217.681
490	14528.9	13084.6	213353	60836.9	21759.5										490	145.289	130.846	2133.53	608.369	217.595
491	14518.5	13014.1	213716	61063.9	21733.4										491	145.185	130.141	2137.16	610.639	217.334
492	14562.2	13082.8	213544	60985.4	21693.7										492	145.622	130.828	2135.44	609.854	216.937
493	14449.5	13034.3	213526	60988.4	21729.7										493	144.495	130.343	2135.26	609.884	217.297
494	14444.8	13004.1	213960	60894.2	21714.7										494	144.448	130.041	2139.6	608.942	217.147
495	14507.7	13018.8	213863	60810.2	21778.8										495	145.077	130.188	2138.63	608.102	217.787
496	14548	13040.4	213902	60810.2	21688.9										496	145.48	130.404	2139.02	608.102	216.889
497	14576.5	13040.2	214052	60905.9	21724.6										497	145.765	130.402	2140.52	609.059	217.246
498	14466.6	12991.9	214269	60953.1	21757.1										498	144.666	129.919	2142.69	609.531	217.571
499	14449.7	13018.2	214253	61007.2	21747.7										499	144.497	130.182	2142.53	610.072	217.477
500	14578.2	13100.2	213959	61058.8	21789.5										500	145.782	131.002	2139.59	610.588	217.895
501	14500.9	13055.8	214460	60903.9	21667.5										501	145.009	130.558	2144.6	609.039	216.675
502	14517.3	13089.6	214431	60861.5	21895										502	145.173	130.896	2144.31	608.615	218.95
503	14500.4	12938.5	214402	60913.2	21818.6										503	145.004	129.385	2144.02	609.132	218.186
504	14516.7	12980.9	214400	60993.3	21711										504	145.167	129.809	2144	609.933	217.11
505	14454.9	12988.9	214327	60926.4	21682.1										505	144.549	129.889	2143.27	609.264	216.821
506	14454.7	13011.1	214567	60674.4	21803.2										506	144.547	130.111	2145.67	606.744	218.032
507	14595.6	13032.9	214945	60983.3	21707.2										507	145.956	130.329	2149.45	609.833	217.072
508	14466.5	13074.8	214756	60820.7	21784.5										508	144.665	130.748	2147.56	608.207	217.845
509	14433.7	13052.1	214507	60860.5	21812.5										509	144.337	130.521	2145.07	608.605	218.125
510	14466.8	12989.1	214727	60784.8	21893.2										510	144.668	129.891	2147.27	607.848	218.932
511	14464.7	13013.9	214910	60815.3	21731.6										511	144.647	130.139	2149.1	608.153	217.316
512	14476.7	13023.8	215065	60784.2	21792.9										512	144.767	130.238	2150.65	607.842	217.929
513	14534.2	13029.2	214802	60622.1	21816.1										513	145.342	130.292	2148.02	606.221	218.161
514	14551.6	13055.6	214968	60920.4	21788										514	145.516	130.556	2149.68	609.204	217.88
515	14494.6	13068.8	215268	60857.5	21779.3										515	144.946	130.688	2152.68	608.575	217.793
516	14495.3	13028.6	215074	60900.8	21771.2										516	144.953	130.286	2150.74	609.008	217.712
517	14590.9	13043.6	215445	61019.6	21798										517	145.909	130.436	2154.45	610.196	217.98
518	14518.7	13035.4	215327	61003.1	21758.4										518	145.187	130.354	2153.27	610.031	217.584
519	14477.2	13022.6	215066	60875.8	21919.6										519	144.772	130.226	2150.66	608.758	219.196
520	14473.4	13017.8	215145	60810.9	21851.3										520	144.734	130.178	2151.45	608.109	218.513
521	14520.7	13116.7	215579	60772	21818.1										521	145.207	131.167	2155.79	607.72	218.181
522	14460	12991.5	215456	60842.8	21865.6										522	144.6	129.915	2154.56	608.428	218.656
523	14430.5	13090.6	215513	60830.5	21927.3										523	144.305	130.906	2155.13	608.305	219.273
524	14504.1	13052.2	215536	60746.2	21880.4										524	145.041	130.522	2155.36	607.462	218.804
525	14454.2	13002.3	215263	60740.5	21835.5										525	144.542	130.023	2152.63	607.405	218.355
526	14472.6	13118.9	215952	60749.4	21841.1										526	144.726	131.189	2159.52	607.494	218.411
527	14484.3	13095.6	215831	60937.7	21922										527	144.843	130.956	2158.31	609.377	219.22
528	14525.9	13077.6	215751	60982	21816										528	145.259	130.776	2157.51	609.82	218.16
529	14452.4	13004.9	215822	60924.7	21911										529	144.524	130.049	2158.22	609.247	219.11
530	14462.4	13085	215606	60845.9	21858.8										530	144.624	130.85	2156.06	608.459	218.588
531	14483	13009.3	215760	60802	21923.6										531	144.83	130.093	2157.6	608.02	219.236
532	14492.1	12991.2	216080	60884.7	21933.4										532	144.921	129.912	2160.8	608.847	219.334
533	14383.1	13042.6	216151	60853.4	21900.2										533	143.831	130.426	2161.51	608.534	219.002
534	14462.4	13090.6	216196	60932.3	21828.7										534	144.624	130.906	2161.96	609.323	218.287
535	14444.9	13076.4	216005	60936.8	21927.3										535	144.449	130.764	2160.05	609.368	219.273
536	14412.8	12998.1	216352	60817.4	21966.8										536	144.128	129.981	2163.52	608.174	219.668
537	14485.3	13045.7	216344	60758.2	21835										537	144.853	130.457	2163.44	607.582	218.35
538	14449.6	13061.2	216260	60809.9	21936.4										538	144.496	130.612	2162.6	608.099	219.364
539	14495.2	13058.3	216659	60820.8	21792.7										539	144.952	130.583	2166.59	608.208	217.927
540	14540.2	13030.5	216342	60930.2	21860.1										540	145.402	130.305	2163.42	609.302	218.601
541	14489.5	12972.9	216455	60854.8	21875.1										541	144.895	129.729	2164.55	608.548	218.751
542	14465.8	13021.8	216632	60733.1	21854.1										542	144.658	130.218	2166.32	607.331	218.541
543	14449	13029.4	216519	60682.8	21969.8										543	144.49	130.294	2165.19	606.828	219.698
544	14531.4	13132.8	216360	60796.1	21862.2										544	145.314	131.328	2163.6	607.961	218.622
545	14445.6	13055.8	216742	60665	21885.3										545	144.456	130.558	2167.42	606.65	218.853
546	14402	13082.5	216785	60474.5	21960.5										546	144.02	130.825	2167.85	604.745	219.605
547	14519.4	12991	216636	60675.3	21947.6										547	145.194	129.91	2166.36	606.753	219.476
548	14428	13019.6	217033	60814.5	21981.4										548	144.28	130.196	2170.33	608.145	219.814
549	14530.1	13034.7	216867	60785.3	21942.5										549	145.301	130.347	2168.67	607.853	219.425
550	14457.4	13015.4	216664	60639.2	21893.9										550	144.574	130.154	2166.64	606.392	218.939
551	14497.8	13022.4	216894	60822.5	21947.9										551	144.978	130.224	2168.94	608.225	219.479
552	14515.2	13025.8	217114	60812.6	21964.3										552	145.152	130.258	2171.14	608.126	219.643
553	14480	12984.4	217041	60725.3	22040.2										553	144.8	129.844	2170.41	607.253	220.402
554	14470.9	13040.3	217260	60702.3	21911.9										554	144.709	130.403	2172.6	607.023	219.119
555	14451	13083.8	217323	60793	21923.8										555	144.51	130.838	2173.23	607.93	219.238
556	14503.7	13075.9	217168	60824.5	21890.5										556	145.037	130.759	2171.68	608.245	218.905
557	14381.1	13015.1	217343	60609.8	22013.2										557	143.811	130.151	2173.43	606.098	220.132
558	14430.8	13058.1	217287	60692.7	21909.1										558	144.308	130.581	2172.87	606.927	219.091
559	14437.6	12984.1	217123	60922.7	21895.7										559	144.376	129.841	2171.23	609.227	218.957
560	14423.3	12958.8	217321	60687.9	21942.8										560	144.233	129.588	2173.21	606.879	219.428
561	14450.6	13097.6	217641	60866	21954.1										561	144.506	130.976	2176.41	608.66	219.541
562	14500.6	13044.5	217547	60697.3	21939.6										562	145.006	130.445	2175.47	606.973	219.396
563	14470.5	12977.3	217422	60677.5	21982.7										563	144.705	129.773	2174.22	606.775	219.827
564	14466.9	13010.7	217435	60717.2	21930.3										564	144.669	130.107	2174.35	607.172	219.303
565	14397.5	13014.8	217471	60769.5	21890.6										565	143.975	130.148	2174.71	607.695	218.906
566	14478.6	13032.3	218108	60841.4	21900.3										566	144.786	130.323	2181.08	608.414	219.003
567	14501.9	13062.5	217416	60815.5	22005.7										567	145.019	130.625	2174.16	608.155	220.057
568	14531.3	13015.1	217716	60771.2	22013.8										568	145.313	130.151	2177.16	607.712	220.138
569	14438.5	13078.3	217995	60705.2	22008.8										569	144.385	130.783	2179.95	607.052	220.088
570	14432.4	13058.1	217812	60706.3	21991.7										570	144.324	130.581	2178.12	607.063	219.917
571	14465.7	12992.3	217917	60696.8	22030.3										571	144.657	129.923	2179.17	606.968	220.303
572	14456.7	12953	217920	60587.7	21989.7										572	144.567	129.53	2179.2	605.877	219.897
573	14497.6	12992.3	217973	60675.2	21978.9										573	144.976	129.923	2179.73	606.752	219.789
574	14522.4	13077.7	218083	60567.9	21912.4										574	145.224	130.777	2180.83	605.679	219.124
575	14429.8	13071.4	217955	60743.1	22013.2										575	144.298	130.714	2179.55	607.431	220.132
576	14504.2	13032	218343	60630.9	21923.7										576	145.042	130.32	2183.43	606.309	219.237
577	14471	13009.4	218214	60682.5	21992.4										577	144.71	130.094	2182.14	606.825	219.924
578	14537.1	13072	218271	60788.4	21974.4										578	145.371	130.72	2182.71	607.884	219.744
579	14385.5	12995	218032	60551.3	22024.4										579	143.855	129.95	2180.32	605.513	220.244
580	14448.4	13003.4	218350	60663	21988										580	144.484	130.034	2183.5	606.63	219.88
581	14416.8	13037.9	218488	60741.2	22036.8										581	144.168	130.379	2184.88	607.412	220.368
582	14483.4	12952.1	218316	60712.3	22018.2										582	144.834	129.521	2183.16	607.123	220.182
583	14535.9	13086.8	218324	60650	21934.7										583	145.359	130.868	2183.24	606.5	219.347
584	14391.1	13028.1	218575	60783.8	21924.2										584	143.911	130.281	2185.75	607.838	219.242
585	14429.3	13061.3	218693	60600.2	21965.9										585	144.293	130.613	2186.93	606.002	219.659
586	14368.1	13097.3	218530	60693.9	21978.6										586	143.681	130.973	2185.3	606.939	219.786
587	14400.3	13035.3	218491	60823.2	21911.4										587	144.003	130.353	2184.91	608.232	219.114
588	14445.8	13057.8	218837	60603	22049.4										588	144.458	130.578	2188.37	606.03	220.494
589	14493.5	13102.7	218705	60745.6	22094.6										589	144.935	131.027	2187.05	607.456	220.946
590	14405.7	12954.4	218557	60833.4	22053.4										590	144.057	129.544	2185.57	608.334	220.534
591	14407.9	12989.3	218833	60666.6	21958.9										591	144.079	129.893	2188.33	606.666	219.589
592	14445.8	13035.8	218869	60711.7	21966										592	144.458	130.358	2188.69	607.117	219.66
593	14531.8	12995.6	218906	60686.1	22049.1										593	145.318	129.956	2189.06	606.861	220.491
594	14446.6	12958.1	218786	60639.3	21969.4										594	144.466	129.581	2187.86	606.393	219.694
595	14398.6	13022.6	218942	60699.9	22045.8										595	143.986	130.226	2189.42	606.999	220.458
596	14506.2	13044.3	219074	60906.2	21992										596	145.062	130.443	2190.74	609.062	219.92
597	14466.6	13083.6	218831	60726.6	22103.5										597	144.666	130.836	2188.31	607.266	221.035
598	14507.7	13061.5	218949	60687.1	21990.2										598	145.077	130.615	2189.49	606.871	219.902
599	14459.5	13027	219260	60567.7	22061.3										599	144.595	130.27	2192.6	605.677	220.613
600	14360.6	13070.9	219145	60810.8	22008.8										600	143.606	130.709	2191.45	608.108	220.088
601	14490.2	13058	134404	18878.8	14819.5										601	144.902	130.58	1344.04	188.788	148.195
602	14403.1	13013.9	133724	18798.7	14628.4										602	144.031	130.139	1337.24	187.987	146.284
603	14513.5	13034.4	133111	18740.7	14432.7										603	145.135	130.344	1331.11	187.407	144.327
604	14424.9	13050.3	131981	18663.7	14372.2										604	144.249	130.503	1319.81	186.637	143.722
605	14496.1	12998.2	131224	18645.7	14322.1										605	144.961	129.982	1312.24	186.457	143.221
606	14425.7	13076.6	130620	18658.3	14296										606	144.257	130.766	1306.2	186.583	142.96
607	14480.5	13015.8	129510	18628	14318										607	144.805	130.158	1295.1	186.28	143.18
608	14462.2	13021.1	129005	18531.3	14190.3										608	144.622	130.211	1290.05	185.313	141.903
609	14447.7	13055.7	128322	18474.7	14181										609	144.477	130.557	1283.22	184.747	141.81
610	14487.5	13089.5	127550	18531	14202.7										610	144.875	130.895	1275.5	185.31	142.027
611	14458.7	13092.7	126748	18441.9	14238.6										611	144.587	130.927	1267.48	184.419	142.386
612	14564.9	13024.2	126253	18366.5	14137.4										612	145.649	130.242	1262.53	183.665	141.374
613	14406	13041.7	125528	18401.6	14221.9										613	144.06	130.417	1255.28	184.016	142.219
614	14461.9	13023	124789	18418.8	14091										614	144.619	130.23	1247.89	184.188	140.91
615	14485.5	12987.2	124121	18320.1	14085.6										615	144.855	129.873	1241.21	183.201	140.856
616	14329.9	13053.9	123316	18289.7	14052.5										616	143.299	130.539	1233.16	182.897	140.525
617	14486.6	13023.1	122905	18218.4	14135.2										617	144.866	130.231	1229.05	182.184	141.352
618	14432.9	12994.9	122172	18159.1	14125.1										618	144.329	129.949	1221.72	181.591	141.251
619	14465.8	12962.5	121477	18204.5	14063										619	144.658	129.625	1214.77	182.045	140.63
620	14448.3	12963.9	120826	18166.3	14172										620	144.483	129.639	1208.26	181.663	141.72
621	14455.4	13057.9	120163	18117.6	13996.3										621	144.554	130.579	1201.63	181.176	139.963
622	14436	13038.6	119707	18083.1	14015.7										622	144.36	130.386	1197.07	180.831	140.157
623	14459.9	12944.6	119133	18066.8	14029.8										623	144.599	129.446	1191.33	180.668	140.298
624	14487.5	13052.3	118487	18003.9	14086.4										624	144.875	130.523	1184.87	180.039	140.864
625	14515.8	13052.4	118055	17902.2	14067.9										625	145.158	130.524	1180.55	179.022	140.679
626	14448.4	13004.4	117474	17982.4	13978.4										626	144.484	130.044	1174.74	179.824	139.784
627	14439.2	13064.8	116684	17991.2	14139.6										627	144.392	130.648	1166.84	179.912	141.396
628	14425.1	13028.1	116294	17913.8	14026.5										628	144.251	130.281	1162.94	179.138	140.265
629	14438.6	12960.5	115523	17858.3	13985.8										629	144.386	129.605	1155.23	178.583	139.858
630	14406.9	13050.2	114969	17865.5	13982.8										630	144.069	130.502	1149.69	178.655	139.828
631	14446.1	13058.5	114508	17863.6	13971.6										631	144.461	130.585	1145.09	178.636	139.716
632	14440.3	13057.7	113813	17746.8	13881.6										632	144.403	130.577	1138.13	177.468	138.816
633	14489.3	13038	113434	17795.4	13987.3										633	144.893	130.38	1134.34	177.954	139.873
634	14456.5	12995.7	113010	17665.5	13969.1										634	144.565	129.957	1130.1	176.655	139.691
635	14392.6	13091.9	112286	17749.1	14008.8										635	143.926	130.919	1122.86	177.491	140.088
636	14526	12996.7	112286	17747.3	13886.6										636	145.26	129.967	1122.86	177.473	138.866
637	14474.4	13034.7	111293	17639.5	13912										637	144.744	130.347	1112.93	176.395	139.12
638	14490.2	12984.6	110804	17617.2	13906.5										638	144.902	129.846	1108.04	176.172	139.065
639	14411.4	12910.8	110079	17535.4	13951.1										639	144.114	129.108	1100.79	175.354	139.511
640	14470.3	13055.1	109719	17687.7	13875										640	144.703	130.551	1097.19	176.877	138.75
641	14445.9	13150.5	109285	17532.5	13884.3										641	144.459	131.505	1092.85	175.325	138.843
642	14449.7	13048	108803	17542.2	13932.9										642	144.497	130.48	1088.03	175.422	139.329
643	14387.5	13031	108453	17497	13923.6										643	143.875	130.31	1084.53	174.97	139.236
644	14399.1	13042.5	107817	17455.1	13883.5										644	143.991	130.425	1078.17	174.551	138.835
645	14393.5	13024.3	107198	17504.8	13903.3										645	143.935	130.243	1071.98	175.048	139.033
646	14459.3	13048.5	106966	17437.9	13814.8										646	144.593	130.485	1069.66	174.379	138.148
647	14373.1	13093.3	106345	17459.4	13921.6										647	143.731	130.933	1063.45	174.594	139.216
648	14452.3	13050.3	105948	17408.4	13882.7										648	144.523	130.503	1059.48	174.084	138.827
649	14363.7	12980.8	105477	17349	13919.2										649	143.637	129.808	1054.77	173.49	139.192
650	14477.1	13029.7	105018	17356.3	13937.3										650	144.771	130.297	1050.18	173.563	139.373
651	14377.8	12989.1	104592	17394.6	13880.6										651	143.778	129.891	1045.92	173.946	138.806
652	14453.8	13032	104161	17294.1	13839.7										652	144.538	130.32	1041.61	172.941	138.397
653	14467.2	13016.7	103901	17383.9	13862.5										653	144.672	130.167	1039.01	173.839	138.625
654	14472.9	13040.6	103210	17263	13803.8										654	144.729	130.406	1032.1	172.63	138.038
655	14435.6	12976	102837	17361.1	13836.8										655	144.356	129.76	1028.37	173.611	138.368
656	14394.6	13062.1	102292	17235.8	13825.5										656	143.946	130.621	1022.91	172.358	138.255
657	14411.1	12983.5	101907	17285.1	13823.3										657	144.111	129.835	1019.07	172.851	138.233
658	14471	13031.1	101331	17214.9	13856.2										658	144.71	130.311	1013.31	172.149	138.562
659	14504.4	13085.1	100980	17194.4	13858.5										659	145.044	130.851	1009.8	171.944	138.585
660	14452.3	13001.1	100676	17142.2	13762.8										660	144.523	130.011	1006.76	171.422	137.628
661	14477.9	13058.3	100072	17157.7	13827.6										661	144.779	130.583	1000.72	171.577	138.276
662	14384.8	12936.7	100008	17170.4	13861.4										662	143.848	129.367	1000.08	171.704	138.614
663	14474.9	13014	99356.1	17162.4	13752.2										663	144.749	130.14	993.561	171.624	137.522
664	14440	13031.3	99187	17145.3	13802										664	144.4	130.313	991.87	171.453	138.02
665	14458.3	12969.8	98863.5	17064.2	13823.4										665	144.583	129.698	988.635	170.642	138.234
666	14443.4	13027.5	98369.7	17044.4	13711.5										666	144.434	130.275	983.697	170.444	137.115
667	14482.2	13066.1	97780.9	17090.2	13771.5										667	144.822	130.661	977.809	170.902	137.715
668	14479.9	13018.7	97524.6	17004.8	13741.9										668	144.799	130.187	975.246	170.048	137.419
669	14477.2	13008.5	97253.6	16972.8	13832.3										669	144.772	130.085	972.536	169.728	138.323
670	14481.6	13011.5	96770	17013.6	13716.6										670	144.816	130.115	967.7	170.136	137.166
671	14390.1	13041.7	96590.1	16977.8	13797.9										671	143.901	130.417	965.901	169.778	137.979
672	14467.2	12994.6	96242.1	16913.3	13721.7										672	144.672	129.946	962.421	169.133	137.217
673	14455.5	13069	95692	16807.7	13788.9										673	144.555	130.69	956.92	168.077	137.889
674	14398	13075.8	95235.6	16850.3	13774.5										674	143.98	130.758	952.356	168.503	137.745
675	14336	13013.1	94807.1	16910.3	13794.1										675	143.36	130.131	948.071	169.103	137.941
676	14422.9	13047.8	94584.4	16890.6	13726.3										676	144.229	130.478	945.844	168.906	137.263
677	14402.5	12963.6	93998.3	16855.8	13739.8										677	144.025	129.636	939.983	168.558	137.398
678	14389.4	13066.1	93748.1	16860.2	13724										678	143.894	130.661	937.481	168.602	137.24
679	14436.7	12990.8	93474	16930.1	13651.8										679	144.367	129.908	934.74	169.301	136.518
680	14400.3	12999.8	93281.6	16835.4	13695.2										680	144.003	129.998	932.816	168.354	136.952
681	14501.4	13016.7	93034.7	16815.1	13755.9										681	145.014	130.167	930.347	168.151	137.559
682	14411	13026.8	92332.2	16718.1	13713.4										682	144.11	130.268	923.322	167.181	137.134
683	14454.9	13048	92354.1	16731.8	13740.7										683	144.549	130.48	923.541	167.318	137.407
684	14499.5	13031.8	91723.6	16811.5	13749.3										684	144.995	130.318	917.236	168.115	137.493
685	14470.6	12938.2	91640.3	16663.6	13658.9										685	144.706	129.382	916.403	166.636	136.589
686	14452.6	12970.7	91185.1	16761.5	13667										686	144.526	129.707	911.851	167.615	136.67
687	14472.6	12978.2	90844.1	16669	13681.1										687	144.726	129.782	908.441	166.69	136.811
688	14408	13033.8	90622.9	16694.3	13661.9										688	144.08	130.338	906.229	166.943	136.619
689	14361.9	13107.4	90359.1	16726.2	13653.5										689	143.619	131.074	903.591	167.262	136.535
690	14413.7	12987.9	90022	16743.6	13715.4										690	144.137	129.879	900.22	167.436	137.154
691	14388	13017.4	89685.4	16654.8	13655										691	143.88	130.174	896.854	166.548	136.55
692	14459.5	13011.6	89260.4	16673.1	13632.9										692	144.595	130.116	892.604	166.731	136.329
693	14458.8	13070	89081.4	16635.8	13668.2										693	144.588	130.7	890.814	166.358	136.682
694	14455.8	13049.9	88719.9	16671.4	13650.6										694	144.558	130.499	887.199	166.714	136.506
695	14351.5	12991.4	88303.9	16677.5	13609.7										695	143.515	129.914	883.039	166.775	136.097
696	14394.9	12986.8	88063.7	16610.5	13603.2										696	143.949	129.868	880.637	166.105	136.032
697	14442.6	13037.9	87922.7	16666.4	13647.9										697	144.426	130.379	879.227	166.664	136.479
698	14472.5	13018.8	87479.1	16622.7	13636.2										698	144.725	130.188	874.791	166.227	136.362
699	14371	12998.5	87233.3	16623.3	13588.5										699	143.71	129.985	872.333	166.233	135.885
700	14457.3	13052.2	86994.6	16568.5	13612.8										700	144.573	130.522	869.946	165.685	136.128
701	14377.2	13002.3	86700.4	16577.5	13568.7										701	143.772	130.023	867.004	165.775	135.687
702	14459.6	12962.5	86372.6	16574.9	13589.1										702	144.596	129.625	863.726	165.749	135.891
703	14391.4	13069.6	86085.5	16471.4	13573.4										703	143.914	130.696	860.855	164.714	135.734
704	14445	13016.7	85838.3	16503.2	13501.2										704	144.45	130.167	858.383	165.032	135.012
705	14432.3	13025	85354.9	16512.9	13633.4										705	144.323	130.25	853.549	165.129	136.334
706	14400.7	12983.7	85373.2	16421.5	13612.4										706	144.007	129.837	853.732	164.215	136.124
707	14518.6	13040.2	85086.6	16481.9	13577.4										707	145.186	130.402	850.866	164.819	135.774
708	14397.8	13036.9	84849.4	16505.4	13613.8										708	143.978	130.369	848.494	165.054	136.138
709	14392.7	13035	84535.8	16513.3	13497.3										709	143.927	130.35	845.358	165.133	134.973
710	14402.9	13009.7	84214.3	16368.9	13560.8										710	144.029	130.097	842.143	163.689	135.608
711	14415.6	13053.4	83809.8	16449.3	13500.8										711	144.156	130.534	838.098	164.493	135.008
712	14412.3	13093.3	83569.8	16418.3	13553.6										712	144.123	130.933	835.698	164.183	135.536
713	14487.3	13066.7	83518.3	16467.5	13586.7										713	144.873	130.667	835.183	164.675	135.867
714	14488.2	13015.7	83188.6	16356.2	13510.6										714	144.882	130.157	831.886	163.562	135.106
715	14405.7	12920.9	82779.4	16445.5	13539.9										715	144.057	129.209	827.794	164.455	135.399
716	14428.7	13038.5	82634.8	16526.8	13506.9										716	144.287	130.385	826.348	165.268	135.069
717	14415.7	12988.5	82463.4	16408.9	13521.3										717	144.157	129.885	824.634	164.089	135.213
718	14430.5	13004.3	82038.6	16374.8	13532.5										718	144.305	130.043	820.386	163.748	135.325
719	14416.9	13027.7	81948.9	16402.8	13586.5										719	144.169	130.277	819.489	164.028	135.865
720	14444.5	13054.8	81718.6	16318.7	13531.3										720	144.445	130.548	817.186	163.187	135.313
721	14459.8	13001.9	81481.5	16394.2	13515.1										721	144.598	130.019	814.815	163.942	135.151
722	14402.2	12925.3	81161.9	16381.1	13533										722	144.022	129.253	811.619	163.811	135.33
723	14411.3	13018.2	80782.6	16311.7	13547.9										723	144.113	130.182	807.826	163.117	135.479
724	14442.3	13082.2	80655.5	16282.1	13497.2										724	144.423	130.822	806.555	162.821	134.972
725	14461	13067.1	80475.9	16226.9	13581.1										725	144.61	130.671	804.759	162.269	135.811
726	14382.7	13054.1	80050.9	16332.8	13601.1										726	143.827	130.541	800.509	163.328	136.011
727	14391.9	13020.1	79891.7	16286	13455.8										727	143.919	130.201	798.917	162.86	134.558
728	14434.5	13038.5	79938.2	16288.3	13502.9										728	144.345	130.385	799.382	162.883	135.029
729	14426.7	13054.3	79731.3	16294.7	13520										729	144.267	130.543	797.313	162.947	135.2
730	14431.1	13017.2	79351.6	16178	13523.8										730	144.311	130.172	793.516	161.78	135.238
731	14469.5	13044.2	79147.9	16218.7	13533.9										731	144.695	130.442	791.479	162.187	135.339
732	14441.1	13041.4	78723.8	16203.6	13532.7										732	144.411	130.414	787.238	162.036	135.327
733	14440.1	13114.2	78666.9	16310.7	13470										733	144.401	131.142	786.669	163.107	134.7
734	14484.1	13055	78525.9	16260.2	13487.1										734	144.841	130.55	785.259	162.602	134.871
735	14398.5	12990.1	78175.6	16212.7	13466.3										735	143.985	129.901	781.756	162.127	134.663
736	14377.6	13029.8	78111.4	16190.2	13432.6										736	143.776	130.298	781.114	161.902	134.326
737	14419.6	13008.3	77917.6	16249.5	13455.3										737	144.196	130.083	779.176	162.495	134.553
738	14508.6	13014.7	77759.8	16192.2	13482.4										738	145.086	130.147	777.598	161.922	134.824
739	14370.1	13002.7	77543.8	16204.5	13516.8										739	143.701	130.027	775.438	162.045	135.168
740	14394.7	12995.3	77181.8	16220	13483.4										740	143.947	129.953	771.818	162.2	134.834
741	14470.6	12978.7	77039.8	16045.3	13450.6										741	144.706	129.787	770.398	160.453	134.506
742	14362.7	12976.7	76848.4	16186.2	13468										742	143.627	129.767	768.484	161.862	134.68
743	14428.7	13030.6	76607.4	16144.8	13533										743	144.287	130.306	766.074	161.448	135.33
744	14385.1	13055	76278.5	16089.2	13456.4										744	143.851	130.55	762.785	160.892	134.564
745	14438.1	13117.5	76124.6	16149.5	13469.5										745	144.381	131.175	761.246	161.495	134.695
746	14426.1	13025.9	76105.6	16145.8	13450.1										746	144.261	130.259	761.056	161.458	134.501
747	14466.3	13066.5	75573.4	16142.6	13434.7										747	144.663	130.665	755.734	161.426	134.347
748	14460.1	13016.9	75546.2	16100.1	13498.5										748	144.601	130.169	755.462	161.001	134.985
749	14450.5	12989.9	75174.5	16062.4	13485.3										749	144.505	129.899	751.745	160.624	134.853
750	14335.2	12996.3	75162.7	16058.5	13446.8										750	143.352	129.963	751.627	160.585	134.468
751	14380.6	13003.2	74934.9	16130.4	13433.5										751	143.806	130.032	749.349	161.304	134.335
752	14376.7	13000.4	74724.3	16086.6	13409.5										752	143.767	130.004	747.243	160.866	134.095
753	14429.1	13016.8	74491.2	16075.2	13432.5										753	144.291	130.168	744.912	160.752	134.325
754	14439.2	13031.3	74409.4	16089	13469.4										754	144.392	130.313	744.094	160.89	134.694
755	14436.6	12976.2	74345.6	16137.9	13466.9										755	144.366	129.762	743.456	161.379	134.669
756	14454.3	13016.4	74082.2	16090.5	13479.7										756	144.543	130.164	740.822	160.905	134.797
757	14444	13029.3	73733.8	16012.5	13418.2										757	144.44	130.293	737.338	160.125	134.182
758	14382.4	12928	73739.6	16027.6	13391.4										758	143.824	129.28	737.396	160.276	133.914
759	14409.8	13002.7	73548.1	16029.5	13454.9										759	144.098	130.027	735.481	160.295	134.549
760	14263	13022.9	73333.7	16032.6	13490										760	142.63	130.229	733.337	160.326	134.9
761	14466.1	13043.6	73088.8	15988.7	13453.3										761	144.661	130.436	730.888	159.887	134.533
762	14439.4	12946.3	72976.6	15994.3	13384.2										762	144.394	129.463	729.766	159.943	133.842
763	14406.8	12990.2	72905.2	15987.2	13383.8										763	144.068	129.902	729.052	159.872	133.838
764	14392.7	12994.5	72632.3	15977.1	13381.2										764	143.927	129.945	726.323	159.771	133.812
765	14409.9	13033.6	72522.5	16030.5	13398.9										765	144.099	130.336	725.225	160.305	133.989
766	14385.3	12978.1	72297.3	16036.9	13461.5										766	143.853	129.781	722.973	160.369	134.615
767	14398.1	12941.2	72159.3	15970.4	13370										767	143.981	129.412	721.593	159.704	133.7
768	14382.7	12946.3	72128.2	15967.4	13351.8										768	143.827	129.463	721.282	159.674	133.518
769	14481	12947.6	71855.7	16021	13370.8										769	144.81	129.476	718.557	160.21	133.708
770	14447.5	13086.5	71422.5	15941.7	13376.8										770	144.475	130.865	714.225	159.417	133.768
771	14354	12995	71511.9	15898.1	13374.2										771	143.54	129.95	715.119	158.981	133.742
772	14431.4	13028.5	71360.2	15920.4	13369.5										772	144.314	130.285	713.602	159.204	133.695
773	14487.1	12982.2	71076.2	16009.8	13427.2										773	144.871	129.822	710.762	160.098	134.272
774	14424.8	12978	71153.5	15906.5	13349										774	144.248	129.78	711.535	159.065	133.49
775	14388.3	12978.3	70773.8	15954.2	13366.8										775	143.883	129.783	707.738	159.542	133.668
776	14424.9	13082.1	70769.3	15926.2	13361.4										776	144.249	130.821	707.693	159.262	133.614
777	14407	13080.4	70586.7	16000.8	13424.7										777	144.07	130.804	705.867	160.008	134.247
778	14438.3	12993.8	70342.4	15989.1	13334.9										778	144.383	129.938	703.424	159.891	133.349
779	14349.2	13023.4	70186.4	15905.7	13319.2										779	143.492	130.234	701.864	159.057	133.192
780	14361.1	13070.9	69985.3	15833	13380.4										780	143.611	130.709	699.853	158.33	133.804
781	14350	12959.6	69881.5	15864.1	13340.9										781	143.5	129.596	698.815	158.641	133.409
782	14431.9	12962.3	69930.3	15842.6	13294										782	144.319	129.623	699.303	158.426	132.94
783	14463.3	12969.1	69646.2	15929.3	13412.4										783	144.633	129.691	696.462	159.293	134.124
784	14426.5	12983.6	69244.1	15915.4	13378.4										784	144.265	129.836	692.441	159.154	133.784
785	14364.3	13045.7	69111.5	15890.3	13408.6										785	143.643	130.457	691.115	158.903	134.086
786	14387.9	13011.5	69274.4	15867.3	13400.4										786	143.879	130.115	692.744	158.673	134.004
787	14410	13080.6	68999.7	15869.1	13341.2										787	144.1	130.806	689.997	158.691	133.412
788	14423.2	13065.8	69118.2	15948.9	13414.9										788	144.232	130.658	691.182	159.489	134.149
789	14378.9	13025.9	68764.9	15869	13356.2										789	143.789	130.259	687.649	158.69	133.562
790	14507.1	13060	68737.4	15865.6	13364										790	145.071	130.6	687.374	158.656	133.64
791	14387.2	13010.8	68387.4	15772.1	13333										791	143.872	130.108	683.874	157.721	133.33
792	14420.2	13002.2	68423.6	15932.7	13360.9										792	144.202	130.022	684.236	159.327	133.609
793	14331.9	12980.6	68220	15796.8	13383.4										793	143.319	129.806	682.2	157.968	133.834
794	14332.8	12989.6	68093.2	15793.3	13300.7										794	143.328	129.896	680.932	157.933	133.007
795	14484	12958.4	68034.2	15838.9	13379										795	144.84	129.584	680.342	158.389	133.79
796	14345.8	12975	67940.3	15873.4	13352.1										796	143.458	129.75	679.403	158.734	133.521
797	14368.5	13048.7	67914.2	15836.7	13350.4										797	143.685	130.487	679.142	158.367	133.504
798	14474.9	13027.9	67456.1	15884	13287.3										798	144.749	130.279	674.561	158.84	132.873
799	14349.6	13114	67426.7	15857.2	13296.7										799	143.496	131.14	674.267	158.572	132.967
800	14402.3	13049.5	67384.7	15810.9	13347.3										800	144.023	130.495	673.847	158.109	133.473
801	14428.6	13013.5	66959.9	15831.5	13273.9										801	144.286	130.135	669.599	158.315	132.739
802	14421.4	12958.7	67015.9	15889.5	13343.2										802	144.214	129.587	670.159	158.895	133.432
803	14440.4	13050.4	66951.9	15767.2	13321.4										803	144.404	130.504	669.519	157.672	133.214
804	14449.5	13030.9	66844.6	15775.5	13364.1										804	144.495	130.309	668.446	157.755	133.641
805	14444.4	12991.3	66623	15875.8	13303.5										805	144.444	129.913	666.23	158.758	133.035
806	14431	12982.5	66665	15826.9	13330.2										806	144.31	129.825	666.65	158.269	133.302
807	14516.7	13014	66361.2	15842.2	13320.8										807	145.167	130.14	663.612	158.422	133.208
808	14408.1	12976.8	66292.1	15714.9	13299.3										808	144.081	129.768	662.921	157.149	132.993
809	14478.7	12987.4	66050.2	15893.2	13238.6										809	144.787	129.874	660.502	158.932	132.386
810	14438.7	13001.5	66014	15773.9	13370.1										810	144.387	130.015	660.14	157.739	133.701
811	14458.6	12965.1	65840.3	15806.7	13245.9										811	144.586	129.651	658.403	158.067	132.459
812	14446.4	12929.4	65902	15778.9	13347.1										812	144.464	129.294	659.02	157.789	133.471
813	14469	12917.5	65659.1	15723	13270.2										813	144.69	129.175	656.591	157.23	132.702
814	14359.6	12946.6	65613.2	15792.6	13312.6										814	143.596	129.466	656.132	157.926	133.126
815	14485.4	12984.5	65403.1	15733.9	13256.3										815	144.854	129.845	654.031	157.339	132.563
816	14442.6	13013.5	65252	15749.5	13221.4										816	144.426	130.135	652.52	157.495	132.214
817	14351.1	13060.5	65537.3	15780.8	13330.5										817	143.511	130.605	655.373	157.808	133.305
818	14407.5	12998.5	65212.2	15724	13298.7										818	144.075	129.985	652.122	157.24	132.987
819	14394.2	12993.2	64895.3	15701.8	13231.3										819	143.942	129.932	648.953	157.018	132.313
820	14365.3	13094.1	64821.2	15727.9	13294										820	143.653	130.941	648.212	157.279	132.94
821	14476.4	13075.7	64864.9	15768.5	13288.5										821	144.764	130.757	648.649	157.685	132.885
822	14357.8	13022.3	64512.7	15783.5	13296.6										822	143.578	130.223	645.127	157.835	132.966
823	14367.9	13066.2	64530.7	15711.6	13307.7										823	143.679	130.662	645.307	157.116	133.077
824	14479.4	13007.9	64299.8	15768.8	13303.6										824	144.794	130.079	642.998	157.688	133.036
825	14431.7	12985.3	64268.6	15730.8	13272.8										825	144.317	129.853	642.686	157.308	132.728
826	14403.2	12964.4	63979.8	15625.6	13255.2										826	144.032	129.644	639.798	156.256	132.552
827	14392.4	13043.1	64069.8	15670.1	13281.1										827	143.924	130.431	640.698	156.701	132.811
828	14480.6	13051.1	63961.4	15606.9	13253.2										828	144.806	130.511	639.614	156.069	132.532
829	14402.3	13016	64003.3	15696.5	13271.4										829	144.023	130.16	640.033	156.965	132.714
830	14420.3	12970.5	63745.5	15681.4	13237.9										830	144.203	129.705	637.455	156.814	132.379
831	14375.9	12974.1	63554.6	15644	13205.1										831	143.759	129.741	635.546	156.44	132.051
832	14388.7	12995.2	63432.2	15747.8	13305.4										832	143.887	129.952	634.322	157.478	133.054
833	14416	12982.8	63452.7	15610.7	13129.6										833	144.16	129.828	634.527	156.107	131.296
834	14429.7	12952.5	63208.4	15746.9	13224.1										834	144.297	129.525	632.084	157.469	132.241
835	14390.4	13055	63107	15712.8	13298.3										835	143.904	130.55	631.07	157.127	132.983
836	14365.3	13061.7	63038.5	15620.7	13199.5										836	143.653	130.617	630.385	156.207	131.995
837	14376.6	13054	62896.9	15693.4	13165.2										837	143.766	130.54	628.969	156.934	131.652
838	14421.1	13014.6	62781	15664.1	13271.6										838	144.211	130.146	627.81	156.641	132.716
839	14406.8	13015.6	62838.8	15579.1	13323.3										839	144.068	130.156	628.388	155.791	133.233
840	14419	12974.3	62606.9	15587.5	13240.3										840	144.19	129.743	626.069	155.875	132.403
841	14369.5	13073.5	62581.3	15624.5	13172.2										841	143.695	130.735	625.813	156.245	131.722
842	14427.4	13003.4	62568.8	15604.4	13246.6										842	144.274	130.034	625.688	156.044	132.466
843	14373.6	12945.2	62447.6	15726	13215.4										843	143.736	129.452	624.476	157.26	132.154
844	14317	13017.9	62301.3	15646.3	13220.2										844	143.17	130.179	623.013	156.463	132.202
845	14428.2	13038.3	62272.2	15565	13210.9										845	144.282	130.383	622.722	155.65	132.109
846	14389.3	12988.7	62096.3	15762.2	13252.8										846	143.893	129.887	620.963	157.622	132.528
847	14484.5	12998.1	61993.5	15588.1	13178.1										847	144.845	129.981	619.935	155.881	131.781
848	14412.3	13026.4	61940.3	15636.2	13259.5										848	144.123	130.264	619.403	156.362	132.595
849	14387	12971.9	61823.4	15594	13213.9										849	143.87	129.719	618.234	155.94	132.139
850	14430.6	13042.9	61939.5	15668.9	13155.6										850	144.306	130.429	619.395	156.689	131.556
851	14374.7	12959.9	61714.4	15602.7	13197.4										851	143.747	129.599	617.144	156.027	131.974
852	14371.7	13027.3	61655.7	15583	13225.1										852	143.717	130.273	616.557	155.83	132.251
853	14345.5	13013.2	61306.8	15599.2	13139.8										853	143.455	130.132	613.068	155.992	131.398
854	14385	13004.4	61341.9	15567.3	13248.1										854	143.85	130.044	613.419	155.673	132.481
855	14360.5	12993.2	61319.3	15634.8	13246.1										855	143.605	129.932	613.193	156.348	132.461
856	14397.5	12965.4	61338.3	15582.3	13262										856	143.975	129.654	613.383	155.823	132.62
857	14424.2	13037.6	61021.1	15611.4	13245.5										857	144.242	130.376	610.211	156.114	132.455
858	14481.2	13019.1	61026.8	15562.6	13152.4										858	144.812	130.191	610.268	155.626	131.524
859	14398.1	12915.6	60977.5	15605.5	13225.5										859	143.981	129.156	609.775	156.055	132.255
860	14474	13033.9	60795.5	15572.6	13133.3										860	144.74	130.339	607.955	155.726	131.333
861	14369	13013.5	60765.8	15594.8	13226.6										861	143.69	130.135	607.658	155.948	132.266
862	14485.8	12941.4	60520.8	15575.8	13169.8										862	144.858	129.414	605.208	155.758	131.698
863	14322.8	13044.4	60519.4	15616	13154.1										863	143.228	130.444	605.194	156.16	131.541
864	14522.2	13027.5	60519.2	15566.5	13211										864	145.222	130.275	605.192	155.665	132.11
865	14358.6	13018	60256.3	15604.2	13223										865	143.586	130.18	602.563	156.042	132.23
866	14390.3	13059	60186.4	15660.2	13168.4										866	143.903	130.59	601.864	156.602	131.684
867	14354.4	13059.9	60287.5	15485.3	13303.4										867	143.544	130.599	602.875	154.853	133.034
868	14473.5	13035.3	60075	15542.2	13170.4										868	144.735	130.353	600.75	155.422	131.704
869	14375.4	13078	60080.9	15517.8	13251.2										869	143.754	130.78	600.809	155.178	132.512
870	14426.6	13003.3	60050.3	15543.6	13221.4										870	144.266	130.033	600.503	155.436	132.214
871	14414.2	13026.8	59957.6	15595.9	13248										871	144.142	130.268	599.576	155.959	132.48
872	14438.3	12973.4	59986.4	15506.6	13146.5										872	144.383	129.734	599.864	155.066	131.465
873	14465.4	13016.9	59799.8	15567.6	13177.5										873	144.654	130.169	597.998	155.676	131.775
874	14400.5	12984.5	59732.1	15537.3	13167.1										874	144.005	129.845	597.321	155.373	131.671
875	14373.9	13013.9	59552.4	15610.9	13276.4										875	143.739	130.139	595.524	156.109	132.764
876	14417.1	13039.9	59459.2	15521.6	13165.4										876	144.171	130.399	594.592	155.216	131.654
877	14440.9	13014.6	59521.1	15520.3	13206.1										877	144.409	130.146	595.211	155.203	132.061
878	14386.6	13005.7	59338.5	15559.7	13176.7										878	143.866	130.057	593.385	155.597	131.767
879	14433.1	12970.9	59095.4	15555.2	13162										879	144.331	129.709	590.954	155.552	131.62
880	14361.6	12991.9	59194.3	15553.5	13152.5										880	143.616	129.919	591.943	155.535	131.525
881	14368	12958.1	59151.6	15548.9	13189										881	143.68	129.581	591.516	155.489	131.89
882	14399.6	13011.9	59237.5	15532.8	13196.1										882	143.996	130.119	592.375	155.328	131.961
883	14398.2	12910.5	58948.7	15513.7	13152.6										883	143.982	129.105	589.487	155.137	131.526
884	14435	13017.5	58821.3	15532.2	13240.6										884	144.35	130.175	588.213	155.322	132.406
885	14408.7	13042.3	58874.3	15463.7	13235.5										885	144.087	130.423	588.743	154.637	132.355
886	14386.8	12980.4	58645.4	15568.5	13157.7										886	143.868	129.804	586.454	155.685	131.577
887	14425.6	13025.4	58790.1	15482.7	13181.6										887	144.256	130.254	587.901	154.827	131.816
888	14376.4	12995.3	58700.8	15482.8	13162.3										888	143.764	129.953	587.008	154.828	131.623
889	14369.5	13051.9	58563.4	15459.7	13160										889	143.695	130.519	585.634	154.597	131.6
890	14400.7	12972.3	58446.1	15533.3	13198.7										890	144.007	129.723	584.461	155.333	131.987
891	14376.8	12976	58509.5	15529.4	13094.2										891	143.768	129.76	585.095	155.294	130.942
892	14365.9	13028.4	58436.8	15500.1	13163.4										892	143.659	130.284	584.368	155.001	131.634
893	14368.1	12967.7	58461.4	15506.9	13196.1										893	143.681	129.677	584.614	155.069	131.961
894	14373.7	13023.1	58157.1	15471.9	13163.4										894	143.737	130.231	581.571	154.719	131.634
895	14333.5	13016.6	58133.8	15412.3	13134.7										895	143.335	130.166	581.338	154.123	131.347
896	14404.7	13075.3	58080	15474.4	13225.9										896	144.047	130.753	580.8	154.744	132.259
897	14413.4	13002.3	57913.1	15477.4	13211.1										897	144.134	130.023	579.131	154.774	132.111
898	14426.3	13026.6	57757.4	15459.4	13176.1										898	144.263	130.266	577.574	154.594	131.761
899	14422.2	13000	57874.1	15431.9	13170.9										899	144.222	130	578.741	154.319	131.709
900	14434.4	12904	57772	15440.6	13145.5										900	144.344	129.04	577.72	154.406	131.455
901	14382.5	13073.2	57882.9	15530.8	13195.7										901	143.825	130.732	578.829	155.308	131.957
902	14372.7	13010.6	57682.7	15464.7	13135.7										902	143.727	130.106	576.827	154.647	131.357
903	14388	12963.7	57682.7	15497.7	13205.9										903	143.88	129.637	576.827	154.977	132.059
904	14408.1	13005	57540.5	15515.4	13152.3										904	144.081	130.05	575.405	155.154	131.523
905	14365.8	12991.8	57383.3	15539.1	13132.8										905	143.658	129.918	573.833	155.391	131.328
906	14396.1	13006.9	57375.9	15424.4	13065.4										906	143.961	130.069	573.759	154.244	130.654
907	14407.8	12933.6	57297.1	15497.6	13217.1										907	144.078	129.336	572.971	154.976	132.171
908	14384.3	13040.4	57156.3	15411.1	13071.1										908	143.843	130.404	571.563	154.111	130.711
909	14378.5	12989.6	57163.6	15427.6	13152.4										909	143.785	129.896	571.636	154.276	131.524
910	14389.9	13019.5	57131.7	15415.2	13167.2										910	143.899	130.195	571.317	154.152	131.672
911	14392.1	13008.7	57167.6	15460.7	13052.2										911	143.921	130.087	571.676	154.607	130.522
912	14411.6	12976.3	57032.6	15337.6	13147.9										912	144.116	129.763	570.326	153.376	131.479
913	14384.8	12953.2	56894.9	15417.8	13204.6										913	143.848	129.532	568.949	154.178	132.046
914	14408.8	13006.2	56968.2	15442.5	13150.8										914	144.088	130.062	569.682	154.425	131.508
915	14407.8	13043.3	56893.9	15413.3	13210.5										915	144.078	130.433	568.939	154.133	132.105
916	14419.2	12972.1	56794.2	15428.7	13204.4										916	144.192	129.721	567.942	154.287	132.044
917	14421.2	12988	56711.5	15329.8	13133.8										917	144.212	129.88	567.115	153.298	131.338
918	14393.7	13054.6	56792.5	15361.9	13122.8										918	143.937	130.546	567.925	153.619	131.228
919	14341.3	12960.3	56522.7	15390.9	13193.3										919	143.413	129.603	565.227	153.909	131.933
920	14352.6	13035.6	56508.1	15393.4	13203.5										920	143.526	130.356	565.081	153.934	132.035
921	14447.1	13047.1	56279.8	15431.6	13121										921	144.471	130.471	562.798	154.316	131.21
922	14368.7	13027.6	56463.7	15414.6	13083.4										922	143.687	130.276	564.637	154.146	130.834
923	14364.5	12954.4	56442.5	15347.9	13076.4										923	143.645	129.544	564.425	153.479	130.764
924	14396.8	12971	56335.9	15414.4	13083.1										924	143.968	129.71	563.359	154.144	130.831
925	14414.9	12969.6	56166.2	15400.2	13136.5										925	144.149	129.696	561.662	154.002	131.365
926	14374.7	12986.8	56045.9	15355.8	13110.9										926	143.747	129.868	560.459	153.558	131.109
927	14460	12997.9	56096.3	15389.2	13199.4										927	144.6	129.979	560.963	153.892	131.994
928	14367.5	12974.4	56077.6	15448.3	13235.1										928	143.675	129.744	560.776	154.483	132.351
929	14394	12939.4	55890.1	15389.4	13138.7										929	143.94	129.394	558.901	153.894	131.387
930	14396.1	12983	55765.8	15391.4	13123.5										930	143.961	129.83	557.658	153.914	131.235
931	14390	13100.3	55743.3	15397.7	13086.5										931	143.9	131.003	557.433	153.977	130.865
932	14354.7	13052.3	55653.5	15395.4	13185.1										932	143.547	130.523	556.535	153.954	131.851
933	14529.7	13047.7	55805.6	15386.5	13159.1										933	145.297	130.477	558.056	153.865	131.591
934	14385.1	12952.1	55529.4	15361	13177.1										934	143.851	129.521	555.294	153.61	131.771
935	14475	12952.8	55704.1	15343.5	13130.3										935	144.75	129.528	557.041	153.435	131.303
936	14411	12967	55546.8	15470.3	13197.2										936	144.11	129.67	555.468	154.703	131.972
937	14374.7	12954.6	55530.2	15403.4	13184.4										937	143.747	129.546	555.302	154.034	131.844
938	14382	12970.8	55334.4	15339.2	13165.4										938	143.82	129.708	553.344	153.392	131.654
939	14398.6	12964.3	55504.6	15377.2	13177.1										939	143.986	129.643	555.046	153.772	131.771
940	14422.2	12996.3	55528.5	15375.1	13152.1										940	144.222	129.963	555.285	153.751	131.521
941	14436.7	13016.8	55378.3	15354.6	13158.9										941	144.367	130.168	553.783	153.546	131.589
942	14394.8	12904.8	55348.4	15342.5	13227.4										942	143.948	129.048	553.484	153.425	132.274
943	14350.1	12952.3	55216.4	15247.4	13191										943	143.501	129.523	552.164	152.474	131.91
944	14395.9	12993.8	54984.7	15441.1	13177										944	143.959	129.938	549.847	154.411	131.77
945	14348.2	13015.4	55041	15408.9	13169.4										945	143.482	130.154	550.41	154.089	131.694
946	14333.1	12891	55039.8	15417.8	13145.3										946	143.331	128.91	550.398	154.178	131.453
947	14390.3	13036.3	55025.9	15468.7	13171.3										947	143.903	130.363	550.259	154.687	131.713
948	14449	13011.3	54898.4	15331.8	13125.3										948	144.49	130.113	548.984	153.318	131.253
949	14486.6	13028.7	54980.8	15393.3	13098.7										949	144.866	130.287	549.808	153.933	130.987
950	14349	13020.4	54872.8	15300	13151.1										950	143.49	130.204	548.728	153	131.511
951	14429.2	12960.9	54765.4	15380	13142.8										951	144.292	129.609	547.654	153.8	131.428
952	14390.5	13011.3	54665	15359.8	13000.6										952	143.905	130.113	546.65	153.598	130.006
953	14464.8	12996.8	54749.2	15388.9	13131.5										953	144.648	129.968	547.492	153.889	131.315
954	14375.8	12917.4	54640.2	15289.6	13198.7										954	143.758	129.174	546.402	152.896	131.987
955	14431.9	13036.9	54533.3	15334.6	13142.3										955	144.319	130.369	545.333	153.346	131.423
956	14367.2	12964.5	54520.5	15333.1	13121.3										956	143.672	129.645	545.205	153.331	131.213
957	14345.8	13006.8	54482.6	15310.3	13153										957	143.458	130.068	544.826	153.103	131.53
958	14330.3	12991.9	54391.6	15350.7	13112.1										958	143.303	129.919	543.916	153.507	131.121
959	14422	12888.9	54384.4	15259	13099.2										959	144.22	128.889	543.844	152.59	130.992
960	14302.6	13017.5	54394.5	15349.2	13103.6										960	143.026	130.175	543.945	153.492	131.036
961	14411.6	12971.6	54466.5	15371.8	13115.4										961	144.116	129.716	544.665	153.718	131.154
962	14368.3	13028.6	54082.3	15374.6	13154.4										962	143.683	130.286	540.823	153.746	131.544
963	14448.1	12979.5	54167.2	15246.9	13170.3										963	144.481	129.795	541.672	152.469	131.703
964	14366	13094	54032.1	15279.1	13080.1										964	143.66	130.94	540.321	152.791	130.801
965	14388.6	12951.9	54147.3	15379.4	13132.8										965	143.886	129.519	541.473	153.794	131.328
966	14320.6	12975.5	54022.4	15279.2	13136.5										966	143.206	129.755	540.224	152.792	131.365
967	14401.1	13026.2	53948.2	15338.5	13079.7										967	144.011	130.262	539.482	153.385	130.797
968	14419.6	13025.4	54035.9	15335.5	13173.5										968	144.196	130.254	540.359	153.355	131.735
969	14425.7	13010.4	53846.2	15320.5	13107.7										969	144.257	130.104	538.462	153.205	131.077
970	14367.1	13021.7	53787.7	15264.1	13157.9										970	143.671	130.217	537.877	152.641	131.579
971	14321.4	13033.9	53846.4	15285.5	13082.1										971	143.214	130.339	538.464	152.855	130.821
972	14457.8	12996.4	53791.1	15302.2	13081.5										972	144.578	129.964	537.911	153.022	130.815
973	14383	13022.6	53633.4	15317.7	13074.3										973	143.83	130.226	536.334	153.177	130.743
974	14390.9	13010.2	53616.2	15316.3	13056.2										974	143.909	130.102	536.162	153.163	130.562
975	14362.1	12967.4	53509.5	15280.5	13193.9										975	143.621	129.674	535.095	152.805	131.939
976	14409.8	13023.3	53646.3	15304.4	13097.2										976	144.098	130.233	536.463	153.044	130.972
977	14338.1	13038.6	53650.5	15283	13082.5										977	143.381	130.386	536.505	152.83	130.825
978	14371.7	13013.8	53336.3	15301	13031.3										978	143.717	130.138	533.363	153.01	130.313
979	14325	13035.9	53487.1	15221.8	13149.2										979	143.25	130.359	534.871	152.218	131.492
980	14388.5	12980.7	53518.2	15281.7	13123.7										980	143.885	129.807	535.183	152.817	131.237
981	14405.3	13013.6	53327.9	15235.2	13118.5										981	144.053	130.136	533.279	152.352	131.185
982	14411.2	12953.5	53330.8	15305.1	13095.9										982	144.112	129.535	533.308	153.051	130.959
983	14468.4	12953.1	53163.3	15345.1	13074.7										983	144.684	129.531	531.633	153.451	130.747
984	14398.7	13021.4	53127	15327.1	13152.9										984	143.987	130.214	531.27	153.271	131.529
985	14318.8	12960.1	53028.4	15248.8	13193.8										985	143.188	129.601	530.284	152.488	131.938
986	14449.8	12963.4	53116.9	15329.7	13087.8										986	144.498	129.634	531.169	153.297	130.878
987	14437.1	13030.7	53133.7	15258.2	13025.8										987	144.371	130.307	531.337	152.582	130.258
988	14387.4	12942.3	53003.1	15255.9	13035.7										988	143.874	129.423	530.031	152.559	130.357
989	14425.4	13002.5	52932.2	15284.7	13139.4										989	144.254	130.025	529.322	152.847	131.394
990	14325.6	13000	52991.7	15352.8	13091.9										990	143.256	130	529.917	153.528	130.919
991	14387.3	13019.2	52932.2	15286.1	13149.2										991	143.873	130.192	529.322	152.861	131.492
992	14364.9	13014.1	52988.8	15335.1	13178.9										992	143.649	130.141	529.888	153.351	131.789
993	14433.1	12987.4	52860.6	15299.5	13204.5										993	144.331	129.874	528.606	152.995	132.045
994	14311.7	12966.5	52730.8	15309.8	13156.7										994	143.117	129.665	527.308	153.098	131.567
995	14333.6	12952.3	52788.3	15206.8	13056.6										995	143.336	129.523	527.883	152.068	130.566
996	14443.8	13001.9	52604	15234.1	13054.6										996	144.438	130.019	526.04	152.341	130.546
997	14427	12963.9	52700.2	15248.9	13045.5										997	144.27	129.639	527.002	152.489	130.455
998	14395.3	12906.6	52582.5	15209.3	13044.3										998	143.953	129.066	525.825	152.093	130.443
999	14373	12974.2	52539	15266.2	13162.6										999	143.73	129.742	525.39	152.662	131.626
1000	14402	12945	52632.8	15265	13089.2										1000	144.02	129.45	526.328	152.65	130.892
1001	14436.3	13067.1	52629.8	15234.6	13111.1										1001	144.363	130.671	526.298	152.346	131.111
1002	14398.3	13019.2	52455.5	15210.2	13106.8										1002	143.983	130.192	524.555	152.102	131.068
1003	14341.7	13038.1	52410.3	15300.7	13106										1003	143.417	130.381	524.103	153.007	131.06
1004	14410.1	12979.6	52378	15258.2	13023.3										1004	144.101	129.796	523.78	152.582	130.233
1005	14411.3	13009	52461.1	15309.9	13070.8										1005	144.113	130.09	524.611	153.099	130.708
1006	14395.5	12972.6	52384.7	15295.1	13072.5										1006	143.955	129.726	523.847	152.951	130.725
1007	14444.3	12953.9	52300.7	15215.2	13206.9										1007	144.443	129.539	523.007	152.152	132.069
1008	14343.2	13006.7	52232.3	15248.9	13090.4										1008	143.432	130.067	522.323	152.489	130.904
1009	14475.6	12949.2	52231.1	15168.7	13041										1009	144.756	129.492	522.311	151.687	130.41
1010	14369	12896.6	52160.6	15257.1	13076.3										1010	143.69	128.966	521.606	152.571	130.763
1011	14395.4	12959.7	51972.5	15252.6	13059.5										1011	143.954	129.597	519.725	152.526	130.595
1012	14387	12978.1	52122.2	15296.7	13053.9										1012	143.87	129.781	521.222	152.967	130.539
1013	14296.5	13012.2	52067.5	15198.6	13052.8										1013	142.965	130.123	520.675	151.986	130.528
1014	14289.3	13019.2	51938	15281.7	13123.6										1014	142.893	130.192	519.38	152.817	131.236
1015	14388.1	13072.7	52020.4	15277.7	13074.4										1015	143.881	130.727	520.204	152.777	130.744
1016	14411.3	12922.3	51929.9	15269.8	13128.1										1016	144.113	129.223	519.299	152.698	131.281
1017	14357.9	12988.3	51879.1	15266.7	13096.6										1017	143.579	129.883	518.791	152.667	130.966
1018	14391.1	12920.1	51820.2	15206.9	13074.9										1018	143.911	129.201	518.202	152.069	130.749
1019	14367.5	13018.4	51806.2	15265.5	13046.4										1019	143.675	130.184	518.062	152.655	130.464
1020	14389.2	12886.2	51771	15241.5	13031.3										1020	143.892	128.862	517.71	152.415	130.313
1021	14478	13034.8	51774.1	15161	13021										1021	144.78	130.348	517.741	151.61	130.21
1022	14478.8	13016.8	51862.5	15253	13074.1										1022	144.788	130.168	518.625	152.53	130.741
1023	14451.1	12989.2	51733.2	15186.4	13070.2										1023	144.511	129.892	517.332	151.864	130.702
1024	14320.9	13009.7	51607.3	15251.7	13083.9										1024	143.209	130.097	516.073	152.517	130.839
1025	14265.8	13091.2	51562.9	15215.2	13103.3										1025	142.658	130.912	515.629	152.152	131.033
1026	14366.5	13037.5	51481.2	15169.8	13122.5										1026	143.665	130.375	514.812	151.698	131.225
1027	14438.1	12946.4	51506.6	15169.8	13108.3										1027	144.381	129.464	515.066	151.698	131.083
1028	14323	13007.2	51562	15149	13128.9										1028	143.23	130.072	515.62	151.49	131.289
1029	14416.5	12976.3	51426.3	15174.7	13082.8										1029	144.165	129.763	514.263	151.747	130.828
1030	14354.3	13035.2	51398.9	15147.4	13089.5										1030	143.543	130.352	513.989	151.474	130.895
1031	14418.1	12931.4	51280.2	15262.6	13096.1										1031	144.181	129.314	512.802	152.626	130.961
1032	14335	12969.4	51386.4	15169.9	13105.5										1032	143.35	129.694	513.864	151.699	131.055
1033	14320.6	12912.2	51292.8	15227.8	13112.5										1033	143.206	129.122	512.928	152.278	131.125
1034	14355.7	12988.4	51339	15234.7	13062.4										1034	143.557	129.884	513.39	152.347	130.624
1035	14395.8	12950.3	51168.4	15217.5	13058.2										1035	143.958	129.503	511.684	152.175	130.582
1036	14382.6	12972.5	51221.7	15125	13087.4										1036	143.826	129.725	512.217	151.25	130.874
1037	14379.5	12963.6	51235.9	15135	13114.2										1037	143.795	129.636	512.359	151.35	131.142
1038	14313.9	12933.2	51104.7	15139.8	13097.8										1038	143.139	129.332	511.047	151.398	130.978
1039	14367.1	12974.5	51167.7	15210.5	13074.2										1039	143.671	129.745	511.677	152.105	130.742
1040	14420.7	12967	50983.9	15108.7	13046.1										1040	144.207	129.67	509.839	151.087	130.461
1041	14456.1	13008.1	51244.6	15225.4	13101.5										1041	144.561	130.081	512.446	152.254	131.015
1042	14376.7	13065.5	51122.4	15230.9	13047										1042	143.767	130.655	511.224	152.309	130.47
1043	14366.5	12936.6	50855.5	15188.5	13123.2										1043	143.665	129.366	508.555	151.885	131.232
1044	14366.7	13021.2	50991.6	15200	13079.4										1044	143.667	130.212	509.916	152	130.794
1045	14314.4	13001.1	50777.8	15149.9	13139.2										1045	143.144	130.011	507.778	151.499	131.392
1046	14345.1	13004.8	50792.8	15233.8	13091.4										1046	143.451	130.048	507.928	152.338	130.914
1047	14334	13003.4	51094.8	15211	13123.2										1047	143.34	130.034	510.948	152.11	131.232
1048	14310.5	12961.3	50809	15255.8	13080.1										1048	143.105	129.613	508.09	152.558	130.801
1049	14429.9	12900.8	50795.5	15263.1	13036.9										1049	144.299	129.008	507.955	152.631	130.369
1050	14428.2	12956.7	50776.9	15175	13124.9										1050	144.282	129.567	507.769	151.75	131.249
1051	14352.3	12933.4	50904.9	15220.3	13134.1										1051	143.523	129.334	509.049	152.203	131.341
1052	14352.4	12920.2	50781.3	15140	13091.4										1052	143.524	129.202	507.813	151.4	130.914
1053	14373	12914.6	50737.8	15114.8	13103.7										1053	143.73	129.146	507.378	151.148	131.037
1054	14408.2	13023.6	50729.3	15200.7	13049.7										1054	144.082	130.236	507.293	152.007	130.497
1055	14438.2	13009	50553	15123.2	13051.6										1055	144.382	130.09	505.53	151.232	130.516
1056	14379.3	12931.9	50625	15155.6	13051.2										1056	143.793	129.319	506.25	151.556	130.512
1057	14372.3	13030.4	50543.5	15140.1	13086.5										1057	143.723	130.304	505.435	151.401	130.865
1058	14383.9	12924.9	50442.3	15227.6	13040.7										1058	143.839	129.249	504.423	152.276	130.407
1059	14395.1	12962	50684.7	15223.9	13078.3										1059	143.951	129.62	506.847	152.239	130.783
1060	14392.8	12995	50444.3	15078.9	13037.8										1060	143.928	129.95	504.443	150.789	130.378
1061	14428.6	12929.9	50367.1	15175.9	13085.3										1061	144.286	129.299	503.671	151.759	130.853
1062	14318.8	12967	50435.5	15201.9	13101.6										1062	143.188	129.67	504.355	152.019	131.016
1063	14381.4	13023.6	50407.3	15200.4	13072.6										1063	143.814	130.236	504.073	152.004	130.726
1064	14381.4	12951	50413.8	15132.3	13091.4										1064	143.814	129.51	504.138	151.323	130.914
1065	14367.5	12896	50425.5	15149	13038.8										1065	143.675	128.96	504.255	151.49	130.388
1066	14355.2	12951.7	50368.4	15229.6	13082.8										1066	143.552	129.517	503.684	152.296	130.828
1067	14349.3	12921.3	50227.9	15195.2	13065.5										1067	143.493	129.213	502.279	151.952	130.655
1068	14357.7	12922.4	50234.1	15156.4	13131.8										1068	143.577	129.224	502.341	151.564	131.318
1069	14392.6	13035	50277.6	15135.3	13061.5										1069	143.926	130.35	502.776	151.353	130.615
1070	14434.3	12922.7	50243.8	15083.7	13103.1										1070	144.343	129.227	502.438	150.837	131.031
1071	14376.9	13005.8	50063.6	15167.1	13051.2										1071	143.769	130.058	500.636	151.671	130.512
1072	14455.4	12973	50260.6	15078.9	13064.6										1072	144.554	129.73	502.606	150.789	130.646
1073	14441.7	12992.1	50074.9	15116	13039.9										1073	144.417	129.921	500.749	151.16	130.399
1074	14385.3	12967.4	50034.6	15207.5	13072.7										1074	143.853	129.674	500.346	152.075	130.727
1075	14448.9	12964	50084.9	15101.5	13024.8										1075	144.489	129.64	500.849	151.015	130.248
1076	14394.6	12954.2	49948.5	15131.4	13065.1										1076	143.946	129.542	499.485	151.314	130.651
1077	14404.5	12960	49917.4	15114.8	13091.2										1077	144.045	129.6	499.174	151.148	130.912
1078	14417.6	13034.8	49969.1	15055.1	13098.6										1078	144.176	130.348	499.691	150.551	130.986
1079	14392.8	12923.4	50008.6	15215.8	13018.3										1079	143.928	129.234	500.086	152.158	130.183
1080	14409	13022.9	49979.6	15085.3	12983.5										1080	144.09	130.229	499.796	150.853	129.835
1081	14354.1	12913.9	49876.3	15110.9	13036.4										1081	143.541	129.139	498.763	151.109	130.364
1082	14368.8	13007.1	49770.1	15174.6	13077.5										1082	143.688	130.071	497.701	151.746	130.775
1083	14400.5	12943	49851.6	15022.3	13039.3										1083	144.005	129.43	498.516	150.223	130.393
1084	14341.2	12979.2	49649.7	15140.2	13123.7										1084	143.412	129.792	496.497	151.402	131.237
1085	14372.5	12949.7	49756.2	15144	13019.8										1085	143.725	129.497	497.562	151.44	130.198
1086	14405.2	12993.5	49682.9	15122.3	13000.1										1086	144.052	129.935	496.829	151.223	130.001
1087	14332	12909.8	49680	15128	13099.1										1087	143.32	129.098	496.8	151.28	130.991
1088	14391.4	12955.1	49733.6	15102.9	13124										1088	143.914	129.551	497.336	151.029	131.24
1089	14387.6	13016.9	49627.5	15076.1	13051.6										1089	143.876	130.169	496.275	150.761	130.516
1090	14412.5	12982.9	49566.4	15112.4	13041.7										1090	144.125	129.829	495.664	151.124	130.417
1091	14333.8	12981.6	49672	15137.5	13066.6										1091	143.338	129.816	496.72	151.375	130.666
1092	14342.8	13014.7	49578.4	15113.4	13092										1092	143.428	130.147	495.784	151.134	130.92
1093	14445	13048.5	49425.9	15158.5	12994.3										1093	144.45	130.485	494.259	151.585	129.943
1094	14461.7	12943.6	49466.2	15103.6	13034.1										1094	144.617	129.436	494.662	151.036	130.341
1095	14345.3	13007.1	49526.2	15136.4	13020.7										1095	143.453	130.071	495.262	151.364	130.207
1096	14338.9	13074.1	49503.3	15155.1	13029.9										1096	143.389	130.741	495.033	151.551	130.299
1097	14381.2	12989.6	49215.8	15026.7	13098.6										1097	143.812	129.896	492.158	150.267	130.986
1098	14349	13011.8	49434.3	15061.8	13067.4										1098	143.49	130.118	494.343	150.618	130.674
1099	14390.9	13002.3	49409.1	15143.1	13066.9										1099	143.909	130.023	494.091	151.431	130.669
1100	14369.9	12993.1	49413.4	15222.3	13048										1100	143.699	129.931	494.134	152.223	130.48
1101	14347.8	12968.7	49237.2	15138.3	13064.7										1101	143.478	129.687	492.372	151.383	130.647
1102	14448.5	12949.8	49251.8	15084.2	13085.2										1102	144.485	129.498	492.518	150.842	130.852
1103	14425.4	12981.4	49085.6	15095.5	12977.7										1103	144.254	129.814	490.856	150.955	129.777
1104	14420.6	13060.4	49291.3	15123.3	13044.4										1104	144.206	130.604	492.913	151.233	130.444
1105	14387.5	12989	49176.8	15038.1	13060.8										1105	143.875	129.89	491.768	150.381	130.608
1106	14355.8	12949.6	49240.5	15146.4	13076										1106	143.558	129.496	492.405	151.464	130.76
1107	14405.9	12994	49212.9	15133.7	13041.2										1107	144.059	129.94	492.129	151.337	130.412
1108	14390.4	12902.6	49038	15132.6	13058.9										1108	143.904	129.026	490.38	151.326	130.589
1109	14362.6	12953.8	49217	15099.5	13086.2										1109	143.626	129.538	492.17	150.995	130.862
1110	14406.1	12959.3	48959.6	15065.5	13060.4										1110	144.061	129.593	489.596	150.655	130.604
1111	14289.2	12972.4	49009.8	15112.9	13060.3										1111	142.892	129.724	490.098	151.129	130.603
1112	14455.9	12953	49012.8	15158.3	13050.9										1112	144.559	129.53	490.128	151.583	130.509
1113	14428.5	13010.1	49098.8	15080.1	13074.8										1113	144.285	130.101	490.988	150.801	130.748
1114	14305.4	12913.9	49111.4	15106.9	13076.3										1114	143.054	129.139	491.114	151.069	130.763
1115	14383.2	12942.4	48941	15081	13022.8										1115	143.832	129.424	489.41	150.81	130.228
1116	14367.3	12934.9	48880.4	15092.6	13064.7										1116	143.673	129.349	488.804	150.926	130.647
1117	14297.5	12935.9	48974.8	15114	13034.9										1117	142.975	129.359	489.748	151.14	130.349
1118	14350.9	12950.2	48925.4	15057.5	13066.1										1118	143.509	129.502	489.254	150.575	130.661
1119	14334.3	12991.6	48961.2	15048.6	13030.4										1119	143.343	129.916	489.612	150.486	130.304
1120	14310.2	13023.9	48889.1	15131.1	13116.7										1120	143.102	130.239	488.891	151.311	131.167
1121	14384.7	12953.3	48806.1	15113.5	13042										1121	143.847	129.533	488.061	151.135	130.42
1122	14408.6	13024.1	48882	15106.6	12961.1										1122	144.086	130.241	488.82	151.066	129.611
1123	14387.2	12947.1	48749.6	15053.4	13107.1										1123	143.872	129.471	487.496	150.534	131.071
1124	14370.1	12988.2	48678.4	15072.5	13084.9										1124	143.701	129.882	486.784	150.725	130.849
1125	14352	13051.5	48562.7	15046.3	13109.4										1125	143.52	130.515	485.627	150.463	131.094
1126	14470.6	13028.5	48798.4	15030.3	13056.8										1126	144.706	130.285	487.984	150.303	130.567
1127	14313	12951	48790.7	15094.6	13180										1127	143.13	129.51	487.907	150.946	131.8
1128	14380.1	12979.8	48622.6	15079.7	13062										1128	143.801	129.798	486.226	150.797	130.62
1129	14402	12993.7	48691.7	15036.8	13097.1										1129	144.02	129.937	486.917	150.368	130.971
1130	14382.4	13029.4	48512.9	15099	12993.4										1130	143.824	130.294	485.129	150.99	129.934
1131	14433.2	12975.4	48631.6	15155.3	13030.8										1131	144.332	129.754	486.316	151.553	130.308
1132	14334.2	13002	48624.5	15135.8	13090.7										1132	143.342	130.02	486.245	151.358	130.907
1133	14339.4	13002.5	48573	15082.4	13131										1133	143.394	130.025	485.73	150.824	131.31
1134	14333.9	12896.1	48499.3	15000.7	13044.8										1134	143.339	128.961	484.993	150.007	130.448
1135	14391.9	13015.3	48517.2	15100.6	13039.9										1135	143.919	130.153	485.172	151.006	130.399
1136	14332.6	12930.2	48501.5	15113	13056.3										1136	143.326	129.302	485.015	151.13	130.563
1137	14363.9	12990.2	48512	15148.7	13055.4										1137	143.639	129.902	485.12	151.487	130.554
1138	14438.5	12956.9	48548.5	15065.3	13029.6										1138	144.385	129.569	485.485	150.653	130.296
1139	14416.6	13004.9	48365.6	15048.3	13087.8										1139	144.166	130.049	483.656	150.483	130.878
1140	14439	13004.4	48328.6	15025.2	13107.1										1140	144.39	130.044	483.286	150.252	131.071
1141	14405.5	13015.2	48463.8	15024.7	13015.7										1141	144.055	130.152	484.637	150.247	130.157
1142	14366.1	13039.1	48328.3	15022.3	13036.8										1142	143.661	130.391	483.283	150.223	130.368
1143	14448.4	12897	48310.8	15052.9	13053.4										1143	144.484	128.97	483.108	150.529	130.534
1144	14425.6	12921.9	48224.7	15008	13035.3										1144	144.256	129.219	482.247	150.08	130.353
1145	14370.6	12966.3	48336.7	15015.9	13109.9										1145	143.706	129.663	483.367	150.159	131.099
1146	14412.5	13001.6	48268.5	15108.3	12985.7										1146	144.125	130.016	482.685	151.083	129.857
1147	14393.7	13023	48266.3	14962.2	13148.5										1147	143.937	130.23	482.663	149.622	131.485
1148	14414.5	12935.7	48183	15120.1	12994.4										1148	144.145	129.357	481.83	151.201	129.944
1149	14318.9	12987.9	48268	15059.4	13147.2										1149	143.189	129.879	482.68	150.594	131.472
1150	14355.9	12965	48273.4	15046.7	13049.2										1150	143.559	129.65	482.734	150.467	130.492
1151	14378.8	13017.1	48194.2	15129.3	13059.9										1151	143.788	130.171	481.942	151.293	130.599
1152	14379.3	12943.6	48130.7	15074.2	13073.7										1152	143.793	129.436	481.307	150.742	130.737
1153	14386	12974.7	48058	15085.9	13002.4										1153	143.86	129.747	480.58	150.859	130.024
1154	14357	13011.7	47986.8	15101.9	13041.8										1154	143.57	130.117	479.868	151.019	130.418
1155	14408.4	12985.5	48033	15052.3	13018.9										1155	144.084	129.855	480.33	150.523	130.189
1156	14393.7	12943.8	48023.2	15049.8	13019.6										1156	143.937	129.438	480.232	150.498	130.196
1157	14338.5	12997.6	48099.3	15048.9	13120.2										1157	143.385	129.976	480.993	150.489	131.202
1158	14464	12908.6	48038.4	15025.9	13075.8										1158	144.64	129.086	480.384	150.259	130.758
1159	14374.3	12959.3	47836.9	15093.8	13026.8										1159	143.743	129.593	478.369	150.938	130.268
1160	14389.9	13005.3	48136.5	14985.5	13000										1160	143.899	130.053	481.365	149.855	130
1161	14457.3	12985.7	47989.7	15100.5	13058.3										1161	144.573	129.857	479.897	151.005	130.583
1162	14344.5	12958.2	47924.8	15038.4	13001										1162	143.445	129.582	479.248	150.384	130.01
1163	14410	12971.5	47840.1	14988.3	13035.1										1163	144.1	129.715	478.401	149.883	130.351
1164	14367.4	13051.7	47865.5	14996	13008										1164	143.674	130.517	478.655	149.96	130.08
1165	14358.8	13003.6	47858.3	15090.6	13009.7										1165	143.588	130.036	478.583	150.906	130.097
1166	14296	13023.9	47831.6	15067.5	13054										1166	142.96	130.239	478.316	150.675	130.54
1167	14365.9	12996.8	47848.2	15033.6	13074.3										1167	143.659	129.968	478.482	150.336	130.743
1168	14354.1	12928.7	47808.6	15105.9	13043										1168	143.541	129.287	478.086	151.059	130.43
1169	14383.5	13033.5	47651.1	15048.3	13041.6										1169	143.835	130.335	476.511	150.483	130.416
1170	14410.9	13034.6	47727.6	14965.8	13051.9										1170	144.109	130.346	477.276	149.658	130.519
1171	14349.5	12943.3	47766	15046.4	13016.3										1171	143.495	129.433	477.66	150.464	130.163
1172	14476.7	13011.4	47715.2	15115.5	12994.8										1172	144.767	130.114	477.152	151.155	129.948
1173	14423.8	13058	47732.3	15084.6	13095.3										1173	144.238	130.58	477.323	150.846	130.953
1174	14389.6	12954.7	47868	15061.1	13117.7										1174	143.896	129.547	478.68	150.611	131.177
1175	14378.2	12979.2	47741.3	15025.5	13023.1										1175	143.782	129.792	477.413	150.255	130.231
1176	14300.6	12972.1	47622	15078.8	13091.1										1176	143.006	129.721	476.22	150.788	130.911
1177	14408.1	12970.4	47669.4	15060.2	12982.4										1177	144.081	129.704	476.694	150.602	129.824
1178	14359.3	13032.7	47635	14974	12971.7										1178	143.593	130.327	476.35	149.74	129.717
1179	14449.4	12951.9	47577.7	15071.5	13046.3										1179	144.494	129.519	475.777	150.715	130.463
1180	14435.3	12986.8	47647.5	15032.6	13049.9										1180	144.353	129.868	476.475	150.326	130.499
1181	14372.2	13023.3	47583.6	15020.5	13081										1181	143.722	130.233	475.836	150.205	130.81
1182	14368.4	12951.5	47650.9	15085.4	13056.4										1182	143.684	129.515	476.509	150.854	130.564
1183	14432.1	12909.9	47561.1	14947	13006.6										1183	144.321	129.099	475.611	149.47	130.066
1184	14415.3	12952.2	47423.8	15014.7	13035.5										1184	144.153	129.522	474.238	150.147	130.355
1185	14421.2	12915.7	47510.9	15082	13037.1										1185	144.212	129.157	475.109	150.82	130.371
1186	14339.8	13004.2	47512.9	15073.3	13069.2										1186	143.398	130.042	475.129	150.733	130.692
1187	14354	12987.9	47393.1	15039.3	12955.2										1187	143.54	129.879	473.931	150.393	129.552
1188	14369.5	13041.8	47470.4	14933.2	13104.7										1188	143.695	130.418	474.704	149.332	131.047
1189	14336.5	12884.9	47440.6	14914.4	12994.7										1189	143.365	128.849	474.406	149.144	129.947
1190	14448.6	13014.7	47289.2	15092.6	13083.8										1190	144.486	130.147	472.892	150.926	130.838
1191	14356.3	12950	47546.3	15010.4	13086.6										1191	143.563	129.5	475.463	150.104	130.866
1192	14388.4	12980.2	47479.2	15016.4	13026										1192	143.884	129.802	474.792	150.164	130.26
1193	14433.4	12946.3	47451.9	15051.3	13003.1										1193	144.334	129.463	474.519	150.513	130.031
1194	14330.4	12977	47372.1	15098.5	13049.6										1194	143.304	129.77	473.721	150.985	130.496
1195	14395.6	12990.3	47406.9	14942.1	13019.9										1195	143.956	129.903	474.069	149.421	130.199
1196	14323.7	12954	47268.3	14990	13045.1										1196	143.237	129.54	472.683	149.9	130.451
1197	14431.3	12945.1	47225	14963.7	13041.4										1197	144.313	129.451	472.25	149.637	130.414
1198	14355.4	12977.9	47199	15043.9	13049.2										1198	143.554	129.779	471.99	150.439	130.492
1199	14362.2	12977.8	47396.1	14982	13064.9										1199	143.622	129.778	473.961	149.82	130.649
1200	14317.2	12982.6	47256.8	15007.7	13042.9										1200	143.172	129.826	472.568	150.077	130.429
1201	14377.9	12984.3	47349.3	15070.6	13041.9										1201	143.779	129.843	473.493	150.706	130.419
1202	14423	12939.5	47181.7	15061	13008.4										1202	144.23	129.395	471.817	150.61	130.084
1203	14337.7	12946.8	47241	15005.3	13018.8										1203	143.377	129.468	472.41	150.053	130.188
1204	14461.3	13038	47319.2	15002.1	12996.6										1204	144.613	130.38	473.192	150.021	129.966
1205	14384.7	12967	46961.8	15094.7	13091.9										1205	143.847	129.67	469.618	150.947	130.919
1206	14431.5	12982.2	47182.3	14958.5	13050.1										1206	144.315	129.822	471.823	149.585	130.501
1207	14421.6	12969.4	47064.4	15013.4	12974.6										1207	144.216	129.694	470.644	150.134	129.746
1208	14372.9	12920.1	47113.4	14987.3	13039.7										1208	143.729	129.201	471.134	149.873	130.397
1209	14320	12943.4	46992.8	15018	12946.6										1209	143.2	129.434	469.928	150.18	129.466
1210	14394.8	12959.5	47019	14998.1	13084.5										1210	143.948	129.595	470.19	149.981	130.845
1211	14439.4	12941.2	46919.9	14956.6	13044.2										1211	144.394	129.412	469.199	149.566	130.442
1212	14381.9	13003.9	47144.2	15037.1	13028.1										1212	143.819	130.039	471.442	150.371	130.281
1213	14374.2	12984.3	47088	15031.2	13107.7										1213	143.742	129.843	470.88	150.312	131.077
1214	14445.8	12935.6	47065	14994.7	13119.2										1214	144.458	129.356	470.65	149.947	131.192
1215	14363.5	12989.2	47009.8	14980.2	12997.9										1215	143.635	129.892	470.098	149.802	129.979
1216	14407.6	12985.1	46861.7	15000.2	13017.8										1216	144.076	129.851	468.617	150.002	130.178
1217	14323.8	12936.7	46864.5	14970.7	13022.5										1217	143.238	129.367	468.645	149.707	130.225
1218	14367.7	13005.7	46840.3	14980.6	13019.9										1218	143.677	130.057	468.403	149.806	130.199
1219	14317.4	13036.5	46848	14973.1	13073.7										1219	143.174	130.365	468.48	149.731	130.737
1220	14350.8	12948.5	46899	14912.2	12996.7										1220	143.508	129.485	468.99	149.122	129.967
1221	14345.4	12956.1	46856.1	15036.2	13088.7										1221	143.454	129.561	468.561	150.362	130.887
1222	14396.8	13051	46857.6	15098.2	13024.1										1222	143.968	130.51	468.576	150.982	130.241
1223	14406	12920.3	46976.1	14986.9	12987.4										1223	144.06	129.203	469.761	149.869	129.874
1224	14378.4	12948.5	46932.8	15005.3	12993.2										1224	143.784	129.485	469.328	150.053	129.932
1225	14463.1	12978.7	46854.6	14998.6	13067.6										1225	144.631	129.787	468.546	149.986	130.676
1226	14426.8	13008.1	46902.3	15008.3	13029										1226	144.268	130.081	469.023	150.083	130.29
1227	14338	12939.8	46876.4	14980.1	12998.6										1227	143.38	129.398	468.764	149.801	129.986
1228	14435.6	12898.8	46891.9	14996.9	12972.9										1228	144.356	128.988	468.919	149.969	129.729
1229	14445.9	12965.6	46758.8	15082.8	12987.7										1229	144.459	129.656	467.588	150.828	129.877
1230	14374.7	13021.7	46733.7	14912.6	13105.4										1230	143.747	130.217	467.337	149.126	131.054
1231	14422.9	12987.9	46669.7	14953.7	12997.1										1231	144.229	129.879	466.697	149.537	129.971
1232	14449.9	12920.1	46681.5	14938.8	13044.9										1232	144.499	129.201	466.815	149.388	130.449
1233	14352.1	13053.3	46658	14953.7	13053.2										1233	143.521	130.533	466.58	149.537	130.532
1234	14458.6	13026.9	46676.7	15036.6	12984.1										1234	144.586	130.269	466.767	150.366	129.841
1235	14399.3	13023	46714.2	14980.8	13054.9										1235	143.993	130.23	467.142	149.808	130.549
1236	14372.6	12928.3	46671.3	14989.8	12967.2										1236	143.726	129.283	466.713	149.898	129.672
1237	14306.1	12975.8	46627.9	14953	12984.9										1237	143.061	129.758	466.279	149.53	129.849
1238	14365.8	12902.9	46677.5	15020.2	13020.3										1238	143.658	129.029	466.775	150.202	130.203
1239	14399.2	13022.3	46604.9	14931.2	13004.9										1239	143.992	130.223	466.049	149.312	130.049
1240	14508.2	12988.8	46612.4	15009.9	12993.5										1240	145.082	129.888	466.124	150.099	129.935
1241	14437	12944.9	46600.7	14950.1	13109.4										1241	144.37	129.449	466.007	149.501	131.094
1242	14392	12961.7	46582.8	14978.1	13017.8										1242	143.92	129.617	465.828	149.781	130.178
1243	14404.9	12959.4	46496.1	14977.6	13099.9										1243	144.049	129.594	464.961	149.776	130.999
1244	14364	12963.2	46617.3	14941.9	12958.5										1244	143.64	129.632	466.173	149.419	129.585
1245	14458.4	12926.6	46424.5	15027.6	13022.6										1245	144.584	129.266	464.245	150.276	130.226
1246	14513.7	12955.1	46473.8	14920.9	12971.6										1246	145.137	129.551	464.738	149.209	129.716
1247	14402.9	12932.6	46455.6	14988.6	13066.5										1247	144.029	129.326	464.556	149.886	130.665
1248	14382.4	12933.7	46285.5	14952.2	13047.6										1248	143.824	129.337	462.855	149.522	130.476
1249	14373.6	12947.6	46382.7	15026.5	13014.4										1249	143.736	129.476	463.827	150.265	130.144
1250	14384	12957.9	46291.5	15065.9	13034.6										1250	143.84	129.579	462.915	150.659	130.346
1251	14384.4	13045	46328.4	14969.1	13062.1										1251	143.844	130.45	463.284	149.691	130.621
1252	14350.7	12990.1	46429.3	14932.5	13036.7										1252	143.507	129.901	464.293	149.325	130.367
1253	14300.6	12949.8	46426.3	15020.1	13010										1253	143.006	129.498	464.263	150.201	130.1
1254	14445.5	13051.4	46388.7	14896.5	13145.4										1254	144.455	130.514	463.887	148.965	131.454
1255	14379.5	12950.4	46383.2	14892.1	13093.3										1255	143.795	129.504	463.832	148.921	130.933
1256	14344.5	13031.2	46322.3	14910.8	13005.6										1256	143.445	130.312	463.223	149.107	130.056
1257	14368	12909.4	46369.9	15026.3	13039.8										1257	143.68	129.094	463.699	150.263	130.398
1258	14304.1	12900.4	46287.6	15034.8	13079.6										1258	143.041	129.004	462.876	150.348	130.796
1259	14407.5	12997.6	46292.1	14940.7	13090.9										1259	144.075	129.976	462.921	149.407	130.909
1260	14304	12961.6	46196.8	14914.2	13008.4										1260	143.04	129.616	461.968	149.142	130.084
1261	14383.2	13012.5	46351.3	15049.3	13046.7										1261	143.832	130.125	463.513	150.493	130.467
1262	14404.9	12946.2	46309.6	15061.6	13029.1										1262	144.049	129.462	463.096	150.616	130.291
1263	14237.6	12904.3	46153.2	14974.7	13009										1263	142.376	129.043	461.532	149.747	130.09
1264	14385.6	12924.5	46283.6	14901.8	13018										1264	143.856	129.245	462.836	149.018	130.18
1265	14405.3	12981.5	46122.3	14996.5	13096.2										1265	144.053	129.815	461.223	149.965	130.962
1266	14297.8	12940.2	46062.5	14954.9	13101.3										1266	142.978	129.402	460.625	149.549	131.013
1267	14396.6	12960.4	46061.4	15005.2	13018.6										1267	143.966	129.604	460.614	150.052	130.186
1268	14381.9	12985.4	46197.2	14894.6	13065.4										1268	143.819	129.854	461.972	148.946	130.654
1269	14442.8	12984.9	46149	14983.1	13025.7										1269	144.428	129.849	461.49	149.831	130.257
1270	14359.7	13020	46156.3	14956.5	13027.1										1270	143.597	130.2	461.563	149.565	130.271
1271	14392.8	12944.8	46113.7	14937.4	12965										1271	143.928	129.448	461.137	149.374	129.65
1272	14451.2	12936.8	46187.9	14968.1	13019.6										1272	144.512	129.368	461.879	149.681	130.196
1273	14463.1	13027.5	46109.4	15022.7	13045.2										1273	144.631	130.275	461.094	150.227	130.452
1274	14281.2	12968.9	45955.8	14960.2	13066.3										1274	142.812	129.689	459.558	149.602	130.663
1275	14360.9	12962.8	45914.3	14871.2	13025.6										1275	143.609	129.628	459.143	148.712	130.256
1276	14355.1	12981.3	46149.2	14943.9	13003.5										1276	143.551	129.813	461.492	149.439	130.035
1277	14397.8	12981.9	45916.7	14948	13003.8										1277	143.978	129.819	459.167	149.48	130.038
1278	14377.9	12941.8	46076.5	14903.3	13132.8										1278	143.779	129.418	460.765	149.033	131.328
1279	14382.2	12965.9	45972.8	14899.2	13024.2										1279	143.822	129.659	459.728	148.992	130.242
1280	14354.7	13002.2	45941.3	14950.8	13077.2										1280	143.547	130.022	459.413	149.507	130.772
1281	14273.4	12929.2	46025.8	14916.7	13033.1										1281	142.734	129.292	460.258	149.167	130.331
1282	14360.5	12979.3	46048.6	15029.6	13027										1282	143.605	129.793	460.486	150.296	130.27
1283	14450.3	13007.6	45974.9	14966.5	13039.3										1283	144.503	130.076	459.749	149.665	130.393
1284	14391.7	12980.7	46075.8	14932.1	12998.8										1284	143.917	129.807	460.758	149.321	129.988
1285	14292.1	12999.7	45948.7	14945.8	13001.8										1285	142.921	129.997	459.487	149.458	130.018
1286	14346.8	12896.2	45921.7	14935.3	13087.9										1286	143.468	128.962	459.217	149.353	130.879
1287	14395.4	12946.2	45857.8	14882.7	13018.2										1287	143.954	129.462	458.578	148.827	130.182
1288	14435.3	12963.7	45714.7	14982.2	13058.1										1288	144.353	129.637	457.147	149.822	130.581
1289	14338	12937.5	45916.1	14987.5	12996.3										1289	143.38	129.375	459.161	149.875	129.963
1290	14383.9	12980.8	45835.7	14954.4	13029.7										1290	143.839	129.808	458.357	149.544	130.297
1291	14384	12918.2	45773.9	14841.1	12991.2										1291	143.84	129.182	457.739	148.411	129.912
1292	14453.2	13065.2	45816.8	14977.2	13063.1										1292	144.532	130.652	458.168	149.772	130.631
1293	14348.9	12883.9	45778.9	14863.9	13002.5										1293	143.489	128.839	457.789	148.639	130.025
1294	14355.2	12910.7	45798	14951.3	13057.3										1294	143.552	129.107	457.98	149.513	130.573
1295	14323.8	12932.4	45856.7	14815.6	13137.6										1295	143.238	129.324	458.567	148.156	131.376
1296	14369.6	12992	45749.2	14966.7	13052.3										1296	143.696	129.92	457.492	149.667	130.523
1297	14345.9	13058.9	45749.5	14954.9	13050.9										1297	143.459	130.589	457.495	149.549	130.509
1298	14340.5	13003.4	45731.2	14866.6	13005.1										1298	143.405	130.034	457.312	148.666	130.051
1299	14400.3	12973.1	45659.4	14969.6	13030.5										1299	144.003	129.731	456.594	149.696	130.305
1300	14334.6	12920.8	45658.7	14916.5	13052.5										1300	143.346	129.208	456.587	149.165	130.525
1301	14369.5	12883.8	45818.6	14898.9	13037.9										1301	143.695	128.838	458.186	148.989	130.379
1302	14459.7	12940.9	45625.8	14863.1	13056.7										1302	144.597	129.409	456.258	148.631	130.567
1303	14422.4	13025.6	45692.5	14961.4	13068.2										1303	144.224	130.256	456.925	149.614	130.682
1304	14365.2	13004.3	45642	14933.5	13020.7										1304	143.652	130.043	456.42	149.335	130.207
1305	14373.3	12934.9	45458.9	14960.6	12939.6										1305	143.733	129.349	454.589	149.606	129.396
1306	14358.9	12926.1	45642.3	14963	13043.2										1306	143.589	129.261	456.423	149.63	130.432
1307	14392.4	12951.5	45503.4	14897.4	13073.8										1307	143.924	129.515	455.034	148.974	130.738
1308	14365.2	12986.2	45500.6	14909.1	13099.4										1308	143.652	129.862	455.006	149.091	130.994
1309	14442.5	12933.5	45480.7	14904.5	12921.4										1309	144.425	129.335	454.807	149.045	129.214
1310	14407.1	12929.3	45632	14937.4	13087.9										1310	144.071	129.293	456.32	149.374	130.879
1311	14386.3	12964.7	45568	14893	12997.3										1311	143.863	129.647	455.68	148.93	129.973
1312	14359.2	12915.2	45627.2	14921.1	12988.4										1312	143.592	129.152	456.272	149.211	129.884
1313	14392.6	13003.9	45512.8	14867.1	13095.8										1313	143.926	130.039	455.128	148.671	130.958
1314	14401.1	12950.4	45632.4	14965.6	13007.8										1314	144.011	129.504	456.324	149.656	130.078
1315	14440.8	12946.7	45494.1	14858.1	13005.1										1315	144.408	129.467	454.941	148.581	130.051
1316	14413.5	12914.5	45451.6	14941.9	12989.2										1316	144.135	129.145	454.516	149.419	129.892
1317	14375.7	12941.6	45342.8	14841.7	13018.5										1317	143.757	129.416	453.428	148.417	130.185
1318	14330.4	12919.2	45469.9	14869.5	12971.7										1318	143.304	129.192	454.699	148.695	129.717
1319	14316	12916.6	45448.5	14911.9	13010.5										1319	143.16	129.166	454.485	149.119	130.105
1320	14412.7	13028.2	45299.9	14976.4	13111.9										1320	144.127	130.282	452.999	149.764	131.119
1321	14345	12942.7	45470.8	14907.6	13049.7										1321	143.45	129.427	454.708	149.076	130.497
1322	14365.3	12977.8	45483.7	14892.7	13027										1322	143.653	129.778	454.837	148.927	130.27
1323	14356.2	12986.8	45360.2	14900.3	12987.3										1323	143.562	129.868	453.602	149.003	129.873
1324	14367.4	12904.3	45270.8	14938.6	13004.7										1324	143.674	129.043	452.708	149.386	130.047
1325	14413	12998.1	45282	14875.5	13052										1325	144.13	129.981	452.82	148.755	130.52
1326	14402.5	12914.9	45267.5	14910.1	13052.7										1326	144.025	129.149	452.675	149.101	130.527
1327	14333.6	13039.3	45257.8	14949.2	12991.9										1327	143.336	130.393	452.578	149.492	129.919
1328	14311.8	12961.4	45335.2	14936.9	13082.8										1328	143.118	129.614	453.352	149.369	130.828
1329	14370.8	12954	45143.7	14927.7	13073.9										1329	143.708	129.54	451.437	149.277	130.739
1330	14329.7	12914.3	45211.6	14924.6	12936.7										1330	143.297	129.143	452.116	149.246	129.367
1331	14373.3	12939.5	45124.2	14958.6	13013.2										1331	143.733	129.395	451.243	149.586	130.132
1332	14406.4	12966.8	45287.1	15001.8	13046.3										1332	144.064	129.668	452.871	150.018	130.463
1333	14368.6	13026.5	45293.6	14936.5	13057										1333	143.686	130.265	452.936	149.365	130.57
1334	14338.9	12927.8	45126.9	14929	12953.8										1334	143.389	129.278	451.269	149.29	129.538
1335	14381.7	12966.2	45223.2	14846.7	13025.9										1335	143.817	129.662	452.232	148.467	130.259
1336	14413.2	12954.8	45210.4	14854.8	13024.7										1336	144.132	129.548	452.104	148.548	130.247
1337	14421.2	12957.6	45212.9	14952.9	12961.5										1337	144.212	129.576	452.129	149.529	129.615
1338	14437	12903.3	45086.6	14948.7	13016.3										1338	144.37	129.033	450.866	149.487	130.163
1339	14295.8	12980	45065.8	14908	12978.2										1339	142.958	129.8	450.658	149.08	129.782
1340	14419.6	12906.9	45005.3	14917.8	13010.3										1340	144.196	129.069	450.053	149.178	130.103
1341	14517.3	12959.9	45172.7	14861.8	12997.3										1341	145.173	129.599	451.727	148.618	129.973
1342	14407.1	12996.1	45115.9	14927.2	13032.2										1342	144.071	129.961	451.159	149.272	130.322
1343	14424.4	12978.7	45050.2	14848.8	12993.3										1343	144.244	129.787	450.502	148.488	129.933
1344	14373.7	12918.4	45075.2	14872.6	12998.5										1344	143.737	129.184	450.752	148.726	129.985
1345	14446.9	12988.9	44989.9	14857	13069.7										1345	144.469	129.889	449.899	148.57	130.697
1346	14386.1	12933.8	45135	14870.7	13088.2										1346	143.861	129.338	451.35	148.707	130.882
1347	14359.4	12969.1	44968.2	14907.9	12969.2										1347	143.594	129.691	449.682	149.079	129.692
1348	14351.6	12910.7	45141.3	14844.3	13016.5										1348	143.516	129.107	451.413	148.443	130.165
1349	14375.6	12999.4	45018.9	14864	13051.1										1349	143.756	129.994	450.189	148.64	130.511
1350	14363.8	12950.5	45096.4	14938.4	13027.9										1350	143.638	129.505	450.964	149.384	130.279
1351	14355.8	12944.9	45097.6	14881.3	13004.6										1351	143.558	129.449	450.976	148.813	130.046
1352	14441.8	12965.8	45153.7	14913.7	12992.5										1352	144.418	129.658	451.537	149.137	129.925
1353	14327.9	12964.4	44900.6	14914.2	13022.2										1353	143.279	129.644	449.006	149.142	130.222
1354	14436.1	12974.7	45046	14910.6	12961.8										1354	144.361	129.747	450.46	149.106	129.618
1355	14344.3	12956.1	44908.7	14903.9	13024.3										1355	143.443	129.561	449.087	149.039	130.243
1356	14465.4	12958.1	45073.8	14886.6	13042.3										1356	144.654	129.581	450.738	148.866	130.423
1357	14354.2	12971.7	44957.2	14977.5	12978.8										1357	143.542	129.717	449.572	149.775	129.788
1358	14349.5	12951.3	44960.5	14961.8	13083.1										1358	143.495	129.513	449.605	149.618	130.831
1359	14415.2	12971	44778.6	14892.9	12970.7										1359	144.152	129.71	447.786	148.929	129.707
1360	14342.8	12937.3	44914.6	14920.2	13056.7										1360	143.428	129.373	449.146	149.202	130.567
1361	14394.3	12985	44950.4	14948.8	12962.9										1361	143.943	129.85	449.504	149.488	129.629
1362	14420	13016.4	44836.4	14914.4	13016.6										1362	144.2	130.164	448.364	149.144	130.166
1363	14331.7	13011.4	44994.4	14966.5	13053.9										1363	143.317	130.114	449.944	149.665	130.539
1364	14410	12970.4	44832.4	14901.8	12998										1364	144.1	129.704	448.324	149.018	129.98
1365	14387.7	12961.2	44756.2	14935.5	13041.4										1365	143.877	129.612	447.562	149.355	130.414
1366	14368.1	12970.3	44735.6	14874.4	13033.6										1366	143.681	129.703	447.356	148.744	130.336
1367	14342.3	12910.9	44807.9	14886.8	13032.2										1367	143.423	129.109	448.079	148.868	130.322
1368	14370.8	12941.4	44939.5	14854.8	12948.7										1368	143.708	129.414	449.395	148.548	129.487
1369	14385	12926.9	44873.9	14898.3	13033.2										1369	143.85	129.269	448.739	148.983	130.332
1370	14242.7	13006	44625	14941.7	12935.7										1370	142.427	130.06	446.25	149.417	129.357
1371	14396.6	12967.1	44821.5	14936.6	13031.8										1371	143.966	129.671	448.215	149.366	130.318
1372	14380.7	12882.6	44835.4	14858.8	13063.7										1372	143.807	128.826	448.354	148.588	130.637
1373	14377.6	12917.8	44774.2	14815.6	12989.9										1373	143.776	129.178	447.742	148.156	129.899
1374	14410	12924.3	44771.3	14847	13052.1										1374	144.1	129.243	447.713	148.47	130.521
1375	14378.4	12935.8	44803.9	14942.7	13033										1375	143.784	129.358	448.039	149.427	130.33
1376	14371.5	12959.7	44804	14972.1	13076.2										1376	143.715	129.597	448.04	149.721	130.762
1377	14371.5	13020.6	44788.6	14862.6	13032.9										1377	143.715	130.206	447.886	148.626	130.329
1378	14366.1	12855.5	44660	14949.4	13061.8										1378	143.661	128.555	446.6	149.494	130.618
1379	14406.1	12939.8	44705.2	14910.4	13021.5										1379	144.061	129.398	447.052	149.104	130.215
1380	14406.9	12962.6	44609.6	14888.5	13016.4										1380	144.069	129.626	446.096	148.885	130.164
1381	14371.8	12957.6	44629.1	14939.6	13043.9										1381	143.718	129.576	446.291	149.396	130.439
1382	14423.1	13007.9	44667.4	14963.8	13059										1382	144.231	130.079	446.674	149.638	130.59
1383	14387.3	12928.2	44600.9	14851.3	13032.3										1383	143.873	129.282	446.009	148.513	130.323
1384	14421.9	12942.4	44428	14914.3	13034.7										1384	144.219	129.424	444.28	149.143	130.347
1385	14384.6	12974.4	44634.9	14913.5	13022.6										1385	143.846	129.744	446.349	149.135	130.226
1386	14428.9	12919.9	44605.8	14868.4	13050.7										1386	144.289	129.199	446.058	148.684	130.507
1387	14356.8	12908.2	44491.6	14842.6	13042.7										1387	143.568	129.082	444.916	148.426	130.427
1388	14379.6	12949.5	44532.4	14825	12983										1388	143.796	129.495	445.324	148.25	129.83
1389	14409	12965.2	44654.7	14872.5	12930										1389	144.09	129.652	446.547	148.725	129.3
1390	14338.1	12933.7	44596.2	14898.9	13046.8										1390	143.381	129.337	445.962	148.989	130.468
1391	14376.5	13016.2	44646.4	14814.2	12949										1391	143.765	130.162	446.464	148.142	129.49
1392	14366.2	13017	44584.9	14942	12924.2										1392	143.662	130.17	445.849	149.42	129.242
1393	14355.6	12960.8	44487.6	14889.6	12993.8										1393	143.556	129.608	444.876	148.896	129.938
1394	14386.1	12931.4	44505.2	14846.9	13017.7										1394	143.861	129.314	445.052	148.469	130.177
1395	14406.8	13002.7	44453.3	14981.7	13041.4										1395	144.068	130.027	444.533	149.817	130.414
1396	14422	12912.1	44517.5	14950.9	13047.8										1396	144.22	129.121	445.175	149.509	130.478
1397	14335.3	12919.8	44496.1	14878.6	13044										1397	143.353	129.198	444.961	148.786	130.44
1398	14395.8	12991.1	44559.7	14895.7	12955										1398	143.958	129.911	445.597	148.957	129.55
1399	14358.7	12950.9	44326.9	14822.9	12960.9										1399	143.587	129.509	443.269	148.229	129.609
1400	14367.2	12910.6	44484.4	14872	12980.6										1400	143.672	129.106	444.844	148.72	129.806
1401	14350.7	12961.6	44477.8	14908.5	13105.6										1401	143.507	129.616	444.778	149.085	131.056
1402	14416.3	12988.1	44423.5	14942.1	13065.6										1402	144.163	129.881	444.235	149.421	130.656
1403	14478.9	12955.7	44514.3	14858.5	12982.4										1403	144.789	129.557	445.143	148.585	129.824
1404	14438.7	12870.4	44412.5	14924.3	13001.1										1404	144.387	128.704	444.125	149.243	130.011
1405	14411.2	12898.8	44400.9	14968.7	13061.4										1405	144.112	128.988	444.009	149.687	130.614
1406	14325.3	13000.3	44431	14917.6	12988.9										1406	143.253	130.003	444.31	149.176	129.889
1407	14350.9	13075.9	44414.3	14949.3	13000										1407	143.509	130.759	444.143	149.493	130
1408	14411.2	12975.3	44300.6	14885.6	12982.8										1408	144.112	129.753	443.006	148.856	129.828
1409	14333.6	12976.4	44373.3	14868.6	12981.6										1409	143.336	129.764	443.733	148.686	129.816
1410	14330.1	12909	44304.3	14902.3	13045.7										1410	143.301	129.09	443.043	149.023	130.457
1411	14454.8	12938.4	44274.7	14857.4	13046.7										1411	144.548	129.384	442.747	148.574	130.467
1412	14407	12917.9	44265.8	14887.9	12965.2										1412	144.07	129.179	442.658	148.879	129.652
1413	14410.7	12934.8	44331.2	14867.5	13020										1413	144.107	129.348	443.312	148.675	130.2
1414	14359.5	12904.5	44284.4	14863.4	12983.3										1414	143.595	129.045	442.844	148.634	129.833
1415	14331	12921.9	44288.5	14884.5	13019.7										1415	143.31	129.219	442.885	148.845	130.197
1416	14407.1	12954.6	44187.8	14871.3	12981.5										1416	144.071	129.546	441.877	148.713	129.815
1417	14375.7	13008.6	44217.5	14902.5	12993.9										1417	143.757	130.086	442.175	149.025	129.939
1418	14435.9	12974.5	44212.3	14945.3	13005.7										1418	144.359	129.745	442.123	149.453	130.057
1419	14391.9	12927.7	44211.2	14900.7	13026										1419	143.919	129.277	442.112	149.007	130.26
1420	14398.8	12954.4	44149.7	14880.7	12949.4										1420	143.988	129.544	441.497	148.807	129.494
1421	14389	13002.6	44253.8	14840.7	13001.1										1421	143.89	130.026	442.538	148.407	130.011
1422	14295.4	12955.9	44143.6	14832	13046.2										1422	142.954	129.559	441.436	148.32	130.462
1423	14385.8	12906.4	44028.6	14943.1	13006.7										1423	143.858	129.064	440.286	149.431	130.067
1424	14422.4	12956.6	44223.5	14805.6	13020.2										1424	144.224	129.566	442.235	148.056	130.202
1425	14353.7	12932.3	44023.2	14906.3	12988.7										1425	143.537	129.323	440.233	149.063	129.887
1426	14346.7	12976.7	44133.8	14898.9	13083.8										1426	143.467	129.767	441.338	148.989	130.838
1427	14294.5	12954.3	44126.4	14871.5	12980.7										1427	142.945	129.543	441.264	148.715	129.807
1428	14340.6	12955.2	44122.1	14880.4	13032.4										1428	143.406	129.552	441.221	148.804	130.324
1429	14392.8	12906.7	43982.7	14842.3	13052.7										1429	143.928	129.067	439.827	148.423	130.527
1430	14408.5	12947.9	43987	14841.8	13063.4										1430	144.085	129.479	439.87	148.418	130.634
1431	14364.6	12926.4	44100.9	14849	12929.2										1431	143.646	129.264	441.009	148.49	129.292
1432	14376	12979.5	44085.9	14830.1	13052										1432	143.76	129.795	440.859	148.301	130.52
1433	14420.8	12918.9	44040.5	14766.3	13040.9										1433	144.208	129.189	440.405	147.663	130.409
1434	14376.4	12989.6	44064.7	14897.7	12995.8										1434	143.764	129.896	440.647	148.977	129.958
1435	14328.8	12975.7	43999.2	14963.2	13074.4										1435	143.288	129.757	439.992	149.632	130.744
1436	14340.3	12967	44006	14904.8	12990.8										1436	143.403	129.67	440.06	149.048	129.908
1437	14329.1	12955.1	44080.9	14882	13075.7										1437	143.291	129.551	440.809	148.82	130.757
1438	14319.2	12986.2	44025.7	14839.1	13036.9										1438	143.192	129.862	440.257	148.391	130.369
1439	14310.7	12948.2	44103.6	14830.5	13018.7										1439	143.107	129.482	441.036	148.305	130.187
1440	14276.9	12949.7	43945.2	14801.5	12978.3										1440	142.769	129.497	439.452	148.015	129.783
1441	14374.3	12927.8	44025.3	14938.8	12991.5										1441	143.743	129.278	440.253	149.388	129.915
1442	14443.1	12975.3	43667.8	14886.7	13082.7										1442	144.431	129.753	436.678	148.867	130.827
1443	14328.2	12952.4	43955.5	14918.4	13027.4										1443	143.282	129.524	439.555	149.184	130.274
1444	14365.3	12996	43991.3	14830.4	12959.3										1444	143.653	129.96	439.913	148.304	129.593
1445	14414.1	12879.8	43877.5	14894.1	13101.3										1445	144.141	128.798	438.775	148.941	131.013
1446	14327	13038.7	44009.2	14866.5	13032.6										1446	143.27	130.387	440.092	148.665	130.326
1447	14381.7	12973.8	44040.3	14925.6	13054.1										1447	143.817	129.738	440.403	149.256	130.541
1448	14394.8	12882.1	43870.4	14894.6	13011.1										1448	143.948	128.821	438.704	148.946	130.111
1449	14361.5	12967.7	43887.1	14904.6	12988.8										1449	143.615	129.677	438.871	149.046	129.888
1450	14460.7	12945.5	43831.2	14871	12951.2										1450	144.607	129.455	438.312	148.71	129.512
1451	14401.5	12997.8	43919.4	14869.3	12996.4										1451	144.015	129.978	439.194	148.693	129.964
1452	14301.8	12940.2	43848.2	14964	13041.8										1452	143.018	129.402	438.482	149.64	130.418
1453	14329.2	12907.2	43896	14896.9	12987.2										1453	143.292	129.072	438.96	148.969	129.872
1454	14354.4	12999.8	43838.5	14909.9	13082.2										1454	143.544	129.998	438.385	149.099	130.822
1455	14390.6	12968.8	43811.3	14885.6	12934.5										1455	143.906	129.688	438.113	148.856	129.345
1456	14393.4	12957.6	43929.7	14773.8	13035.2										1456	143.934	129.576	439.297	147.738	130.352
1457	14374.1	12973.3	43913.1	14801.2	13054.4										1457	143.741	129.733	439.131	148.012	130.544
1458	14380.1	12959	43844.4	14901.5	13016										1458	143.801	129.59	438.444	149.015	130.16
1459	14310.4	12934.4	43842	14891.3	13064.2										1459	143.104	129.344	438.42	148.913	130.642
1460	14408.5	12945.6	43830.1	14896.4	13064.7										1460	144.085	129.456	438.301	148.964	130.647
1461	14344.6	12934	43822.2	14854.6	12990.5										1461	143.446	129.34	438.222	148.546	129.905
1462	14326	12918.1	43742.4	14863.2	13033.1										1462	143.26	129.181	437.424	148.632	130.331
1463	14414.5	12865.6	43885.2	14835.1	13018.5										1463	144.145	128.656	438.852	148.351	130.185
1464	14308.3	12830.7	43808.7	14881.4	12989.9										1464	143.083	128.307	438.087	148.814	129.899
1465	14346.8	13040.2	43614.4	14832	12960.8										1465	143.468	130.402	436.144	148.32	129.608
1466	14364.4	12945.5	43739.2	14951.7	12949.8										1466	143.644	129.455	437.392	149.517	129.498
1467	14341.7	12929.7	43704.7	14895	13061.4										1467	143.417	129.297	437.047	148.95	130.614
1468	14403.4	12967.1	43759	14883.1	13062										1468	144.034	129.671	437.59	148.831	130.62
1469	14436.1	12926.3	43724.6	14809.3	12984.5										1469	144.361	129.263	437.246	148.093	129.845
1470	14344.6	12982.3	43616.4	14872.3	13000										1470	143.446	129.823	436.164	148.723	130
1471	14415.1	12935.7	43667.1	14940.3	13089.2										1471	144.151	129.357	436.671	149.403	130.892
1472	14275.2	12961.5	43750.5	14901	12986										1472	142.752	129.615	437.505	149.01	129.86
1473	14428.6	13014	43669	14856.1	13061.8										1473	144.286	130.14	436.69	148.561	130.618
1474	14439.5	13039.1	43561.9	14838.9	12972.8										1474	144.395	130.391	435.619	148.389	129.728
1475	14401.9	12945.4	43553.2	14834.7	12935.2										1475	144.019	129.454	435.532	148.347	129.352
1476	14403.8	12976.7	43578	14843.8	13041.5										1476	144.038	129.767	435.78	148.438	130.415
1477	14377	12962.6	43746.6	14939.8	12967.2										1477	143.77	129.626	437.466	149.398	129.672
1478	14358.8	12994.2	43581.4	14758.7	13085.1										1478	143.588	129.942	435.814	147.587	130.851
1479	14361.1	12970.2	43527.2	14817.4	12928.2										1479	143.611	129.702	435.272	148.174	129.282
1480	14308.2	12956.1	43615.8	14879.6	13045.6										1480	143.082	129.561	436.158	148.796	130.456
1481	14411.2	12936.8	43584.8	14896.4	13116.3										1481	144.112	129.368	435.848	148.964	131.163
1482	14401.2	12941.7	43551.3	14913.5	12964.2										1482	144.012	129.417	435.513	149.135	129.642
1483	14387.9	12974.6	43538.3	14900.9	13009.6										1483	143.879	129.746	435.383	149.009	130.096
1484	14420	12965.6	43508.6	14906.4	12978.8										1484	144.2	129.656	435.086	149.064	129.788
1485	14402.6	12925.2	43624.3	14819.8	12960.4										1485	144.026	129.252	436.243	148.198	129.604
1486	14377.7	12994.2	43589.6	14841.6	13032.5										1486	143.777	129.942	435.896	148.416	130.325
1487	14413.1	12953.7	43549.5	14848.7	12970										1487	144.131	129.537	435.495	148.487	129.7
1488	14433.7	12968.8	43581	14858	13118.4										1488	144.337	129.688	435.81	148.58	131.184
1489	14349.5	12905.1	43445.4	14869.9	13033.9										1489	143.495	129.051	434.454	148.699	130.339
1490	14376.8	12918.1	43460.1	14883.3	13016.4										1490	143.768	129.181	434.601	148.833	130.164
1491	14411	12909.2	43589.5	14845.6	13002.6										1491	144.11	129.092	435.895	148.456	130.026
1492	14405.9	12897.6	43312.3	14929.1	13012.9										1492	144.059	128.976	433.123	149.291	130.129
1493	14378.6	12927.7	43397.9	14862.8	12975.6										1493	143.786	129.277	433.979	148.628	129.756
1494	14393.3	12901.4	43426.7	14969.9	13021										1494	143.933	129.014	434.267	149.699	130.21
1495	14345.7	12921.7	43584.5	14829	12992.8										1495	143.457	129.217	435.845	148.29	129.928
1496	14334	13000.2	43372	14903.3	12971.6										1496	143.34	130.002	433.72	149.033	129.716
1497	14421.3	12986	43362.6	14788	13023.3										1497	144.213	129.86	433.626	147.88	130.233
1498	14357.6	12902.3	43404.8	14899.4	12992.2										1498	143.576	129.023	434.048	148.994	129.922
1499	14463.2	12947	43317.8	14889.6	12965.3										1499	144.632	129.47	433.178	148.896	129.653
1500	14320	12940	43400.9	14889.3	12986.5										1500	143.2	129.4	434.009	148.893	129.865
1501	14289.8	12983	43394.6	14825.8	13017.8										1501	142.898	129.83	433.946	148.258	130.178
1502	14414.4	12971.3	43387	14833.8	12986.9										1502	144.144	129.713	433.87	148.338	129.869
1503	14394	12937.6	43329.2	14840.6	12969.9										1503	143.94	129.376	433.292	148.406	129.699
1504	14418.7	12967.6	43378	14887.5	13004.7										1504	144.187	129.676	433.78	148.875	130.047
1505	14457.8	13003.7	43372.5	14857.5	13080.2										1505	144.578	130.037	433.725	148.575	130.802
1506	14418.1	13022.4	43441.7	14912.9	13041.6										1506	144.181	130.224	434.417	149.129	130.416
1507	14413.2	12964.3	43350.3	14865.8	12992.3										1507	144.132	129.643	433.503	148.658	129.923
1508	14412	12937.2	43252.3	14893.6	12966.6										1508	144.12	129.372	432.523	148.936	129.666
1509	14363.8	12983.7	43278.3	14828.8	12980.3										1509	143.638	129.837	432.783	148.288	129.803
1510	14331.4	12942.3	43305	14768.1	12984										1510	143.314	129.423	433.05	147.681	129.84
1511	14404.5	12951.4	43238.3	14926.1	12979.6										1511	144.045	129.514	432.383	149.261	129.796
1512	14371.1	12990.5	43285.3	14823.3	13026										1512	143.711	129.905	432.853	148.233	130.26
1513	14391.7	12981	43240.8	14806	13010.6										1513	143.917	129.81	432.408	148.06	130.106
1514	14356.9	12883.6	43190.8	14903.3	12987.4										1514	143.569	128.836	431.908	149.033	129.874
1515	14404.1	12965.1	43338.4	14799.4	13077.7										1515	144.041	129.651	433.384	147.994	130.777
1516	14362.1	12908.3	43075.5	14856.3	12995.6										1516	143.621	129.083	430.755	148.563	129.956
1517	14454.9	12956.9	43212.3	14854	13001.7										1517	144.549	129.569	432.123	148.54	130.017
1518	14351.1	12924.8	43225	14786.9	12972.7										1518	143.511	129.248	432.25	147.869	129.727
1519	14344	13043.1	43217.9	14893.6	12997.3										1519	143.44	130.431	432.179	148.936	129.973
1520	14332.8	12940.1	43253	14830.9	12991.9										1520	143.328	129.401	432.53	148.309	129.919
1521	14387.2	12955.7	43213	14872.5	12924.3										1521	143.872	129.557	432.13	148.725	129.243
1522	14393.2	12924.2	43229.9	14957.4	12999.8										1522	143.932	129.242	432.299	149.574	129.998
1523	14481.8	12919.1	43187	14808.4	13028.7										1523	144.818	129.191	431.87	148.084	130.287
1524	14403.6	12955.5	43211.8	14899.1	13026.7										1524	144.036	129.555	432.118	148.991	130.267
1525	14434.8	12978.3	43109.7	14808.7	12999.9										1525	144.348	129.783	431.097	148.087	129.999
1526	14348.9	12923.3	43206.9	14802	12962.3										1526	143.489	129.233	432.069	148.02	129.623
1527	14381	12926.4	43052.3	14871.8	13037.2										1527	143.81	129.264	430.523	148.718	130.372
1528	14423.8	12926.3	43129.4	14845.5	12989.6										1528	144.238	129.263	431.294	148.455	129.896
1529	14396.9	12876	43143.1	14784.7	13051.4										1529	143.969	128.76	431.431	147.847	130.514
1530	14381.6	12859.3	42965.4	14846	12961.4										1530	143.816	128.593	429.654	148.46	129.614
1531	14380.1	12877.7	43140.4	14909.7	12955.4										1531	143.801	128.777	431.404	149.097	129.554
1532	14382.5	12981.7	43033	14853.9	12944.7										1532	143.825	129.817	430.33	148.539	129.447
1533	14378.7	12937.1	43182.1	14888.9	12993.5										1533	143.787	129.371	431.821	148.889	129.935
1534	14375.6	12922.7	43106.8	14779.1	13001.4										1534	143.756	129.227	431.068	147.791	130.014
1535	14327	12949.2	43078.6	14852.5	12918										1535	143.27	129.492	430.786	148.525	129.18
1536	14423.9	12947	43125.5	14759.6	12981.5										1536	144.239	129.47	431.255	147.596	129.815
1537	14369.5	12864.8	43055.6	14790.9	13022.7										1537	143.695	128.648	430.556	147.909	130.227
1538	14324.5	12863.7	43201.5	14819.3	12979.1										1538	143.245	128.637	432.015	148.193	129.791
1539	14366.2	12935	43030.9	14877.5	13013.8										1539	143.662	129.35	430.309	148.775	130.138
1540	14424.5	12902.8	43092.9	14819.4	13031.7										1540	144.245	129.028	430.929	148.194	130.317
1541	14397.4	12947.9	42871.5	14813.2	12989.9										1541	143.974	129.479	428.715	148.132	129.899
1542	14371.3	12907.9	43071.2	14798.4	13012.5										1542	143.713	129.079	430.712	147.984	130.125
1543	14339.7	12861.2	42961.1	14720.9	12936.9										1543	143.397	128.612	429.611	147.209	129.369
1544	14392.4	12922	42941.1	14782.1	13037.7										1544	143.924	129.22	429.411	147.821	130.377
1545	14418	12952.8	43023.4	14730.7	12974.5										1545	144.18	129.528	430.234	147.307	129.745
1546	14422.9	12963.1	43108.5	14871.8	13025.9										1546	144.229	129.631	431.085	148.718	130.259
1547	14428.2	12925.5	42829.2	14855.9	13026.1										1547	144.282	129.255	428.292	148.559	130.261
1548	14292.8	12895.1	43040.9	14829.9	13022										1548	142.928	128.951	430.409	148.299	130.22
1549	14423.7	12903.7	43034.7	14759.5	12962.9										1549	144.237	129.037	430.347	147.595	129.629
1550	14447.2	12955.3	42958	14795.1	13024.5										1550	144.472	129.553	429.58	147.951	130.245
1551	14356	12964	42953.5	14789.4	12948.1										1551	143.56	129.64	429.535	147.894	129.481
1552	14346.9	12968.3	42940.7	14896.8	13073.6										1552	143.469	129.683	429.407	148.968	130.736
1553	14378	12946.5	42903.5	14766	12901.5										1553	143.78	129.465	429.035	147.66	129.015
1554	14357.5	13029.9	42760.7	14828.6	12969										1554	143.575	130.299	427.607	148.286	129.69
1555	14326.5	12968.8	42768.6	14935.6	13068.4										1555	143.265	129.688	427.686	149.356	130.684
1556	14355.7	12996.4	43027.5	14841.1	12955.2										1556	143.557	129.964	430.275	148.411	129.552
1557	14466.4	12923.3	42832.4	14706.6	12974.6										1557	144.664	129.233	428.324	147.066	129.746
1558	14395.4	12945.9	42880.6	14800.6	12889.4										1558	143.954	129.459	428.806	148.006	128.894
1559	14338.7	12906.8	42798.2	14748.2	13031										1559	143.387	129.068	427.982	147.482	130.31
1560	14384.3	12860.3	42891	14864.7	13026.1										1560	143.843	128.603	428.91	148.647	130.261
1561	14455.3	12927.2	42979	14769.4	12947.8										1561	144.553	129.272	429.79	147.694	129.478
1562	14310.2	12945.5	42889	14865.7	12981.8										1562	143.102	129.455	428.89	148.657	129.818
1563	14400.7	12948.9	42874.6	14790.8	12941.9										1563	144.007	129.489	428.746	147.908	129.419
1564	14412.6	13002.6	42835.5	14881.3	12978.8										1564	144.126	130.026	428.355	148.813	129.788
1565	14362.7	12916.7	42862.8	14769.3	12969.2										1565	143.627	129.167	428.628	147.693	129.692
1566	14424.6	12861.1	42804.1	14875.3	13016.7										1566	144.246	128.611	428.041	148.753	130.167
1567	14358.8	12877.4	42772.8	14768	13020.3										1567	143.588	128.774	427.728	147.68	130.203
1568	14419.4	12989.7	42717.8	14775.1	12960										1568	144.194	129.897	427.178	147.751	129.6
1569	14306.4	12981.8	42729.4	14768.3	13067.3										1569	143.064	129.818	427.294	147.683	130.673
1570	14390	12926.1	42877.5	14889	13015.7										1570	143.9	129.261	428.775	148.89	130.157
1571	14444.4	12999.3	42785.3	14851.3	12983.4										1571	144.444	129.993	427.853	148.513	129.834
1572	14410.3	12900.1	42787.3	14723.4	12922										1572	144.103	129.001	427.873	147.234	129.22
1573	14345.4	12940.5	42789	14783.6	12923.5										1573	143.454	129.405	427.89	147.836	129.235
1574	14335.4	12938.8	42670.1	14814.2	12952										1574	143.354	129.388	426.701	148.142	129.52
1575	14336.2	12958.3	42692.8	14788.7	13009.4										1575	143.362	129.583	426.928	147.887	130.094
1576	14388.9	12993.3	42903.4	14765.5	12976.5										1576	143.889	129.933	429.034	147.655	129.765
1577	14368.1	12863.5	42724.9	14874.9	13034.9										1577	143.681	128.635	427.249	148.749	130.349
1578	14329.7	12962.2	42765.5	14712.1	12989.2										1578	143.297	129.622	427.655	147.121	129.892
1579	14371.1	12952	42635.1	14767.7	13004.9										1579	143.711	129.52	426.351	147.677	130.049
1580	14460.5	12985.4	42649.8	14810.1	12928.5										1580	144.605	129.854	426.498	148.101	129.285
1581	14369	12913.5	42709.3	14796.9	12990.3										1581	143.69	129.135	427.093	147.969	129.903
1582	14356.8	12933.2	42640.3	14860.5	13016.3										1582	143.568	129.332	426.403	148.605	130.163
1583	14367.1	12897.9	42628.2	14857.3	13022.5										1583	143.671	128.979	426.282	148.573	130.225
1584	14406.7	12979.1	42692.5	14790.4	12986.2										1584	144.067	129.791	426.925	147.904	129.862
1585	14324.9	12871.7	42652.2	14823.7	12914.9										1585	143.249	128.717	426.522	148.237	129.149
1586	14438	12898.9	42688.5	14835.5	12952.6										1586	144.38	128.989	426.885	148.355	129.526
1587	14476.9	12928.9	42687.5	14811.8	12929.5										1587	144.769	129.289	426.875	148.118	129.295
1588	14327	12903.1	42574.8	14819	13021.8										1588	143.27	129.031	425.748	148.19	130.218
1589	14402.1	12871.5	42759.6	14800.9	13005										1589	144.021	128.715	427.596	148.009	130.05
1590	14377.2	12886.4	42479.9	14811.2	12962.6										1590	143.772	128.864	424.799	148.112	129.626
1591	14438	12923.9	42601	14860.2	12975.7										1591	144.38	129.239	426.01	148.602	129.757
1592	14370.3	12944.4	42605.5	14831.1	12989.7										1592	143.703	129.444	426.055	148.311	129.897
1593	14343.2	12909.4	42649.3	14795.6	12934.5										1593	143.432	129.094	426.493	147.956	129.345
1594	14360	12967	42564.7	14811.3	13032										1594	143.6	129.67	425.647	148.113	130.32
1595	14390.4	12924.9	42656.2	14773.8	13005										1595	143.904	129.249	426.562	147.738	130.05
1596	14375	12945.3	42514.6	14836.3	13035.3										1596	143.75	129.453	425.146	148.363	130.353
1597	14370.7	12970.7	42392.3	14746.5	13025.4										1597	143.707	129.707	423.923	147.465	130.254
1598	14325.1	12896	42472.9	14908.9	13009										1598	143.251	128.96	424.729	149.089	130.09
1599	14374.7	12997.2	42496.8	14805.8	13031.7										1599	143.747	129.972	424.968	148.058	130.317
1600	14409.1	12879.3	42575.1	14810.9	12972.5										1600	144.091	128.793	425.751	148.109	129.725
1601	14356.7	12922.3	42545.5	14817.3	12955.3										1601	143.567	129.223	425.455	148.173	129.553
1602	14370.5	12962.2	42640.7	14713	13005.8										1602	143.705	129.622	426.407	147.13	130.058
1603	14384	12888.1	42556.6	14739.5	13000.2										1603	143.84	128.881	425.566	147.395	130.002
1604	14320.7	12903.3	42461.3	14876.7	12997.2										1604	143.207	129.033	424.613	148.767	129.972
1605	14362.8	12846.4	42436.9	14758.4	12979.8										1605	143.628	128.464	424.369	147.584	129.798
1606	14461.9	12923.9	42573.3	14793.8	12977.2										1606	144.619	129.239	425.733	147.938	129.772
1607	14366.4	12927	42475.6	14806.4	13032.9										1607	143.664	129.27	424.756	148.064	130.329
1608	14331	12951.3	42591.4	14806	12944.5										1608	143.31	129.513	425.914	148.06	129.445
1609	14341.1	12952.1	42473.7	14773.5	12932.1										1609	143.411	129.521	424.737	147.735	129.321
1610	14374.7	12863.4	42357.4	14738.2	12992.1										1610	143.747	128.634	423.574	147.382	129.921
1611	14346.4	13028.3	42340.8	14839.1	12999.8										1611	143.464	130.283	423.408	148.391	129.998
1612	14353.9	12842.5	42522.1	14825.8	12972.4										1612	143.539	128.425	425.221	148.258	129.724
1613	14357.6	12918.3	42503.8	14805.9	12954										1613	143.576	129.183	425.038	148.059	129.54
1614	14292.1	13002.8	42508.7	14763.1	13013.1										1614	142.921	130.028	425.087	147.631	130.131
1615	14376.7	12910.8	42496.5	14758.1	13028.9										1615	143.767	129.108	424.965	147.581	130.289
1616	14412.5	12942.6	42495.1	14793.3	12943.9										1616	144.125	129.426	424.951	147.933	129.439
1617	14377	12907	42430.3	14780	12977.8										1617	143.77	129.07	424.303	147.8	129.778
1618	14427.4	12943.5	42354.5	14775.9	13031.7										1618	144.274	129.435	423.545	147.759	130.317
1619	14344.2	12993.8	42404.7	14769.3	12956.4										1619	143.442	129.938	424.047	147.693	129.564
1620	14395.2	12940.6	42444.7	14750	12993.2										1620	143.952	129.406	424.447	147.5	129.932
1621	14415.7	12928.2	42366.9	14818.5	12989.5										1621	144.157	129.282	423.669	148.185	129.895
1622	14428.4	12981.5	42239.1	14759.5	12949.3										1622	144.284	129.815	422.391	147.595	129.493
1623	14368.7	12934.2	42192.5	14741.4	13002.3										1623	143.687	129.342	421.925	147.414	130.023
1624	14439.2	13022.3	42276.3	14777.8	12982.5										1624	144.392	130.223	422.763	147.778	129.825
1625	14357.6	12907.4	42351	14785.7	13012.3										1625	143.576	129.074	423.51	147.857	130.123
1626	14423.3	12895.7	42304.5	14745.5	13030.3										1626	144.233	128.957	423.045	147.455	130.303
1627	14335.9	12942.3	42282.8	14713	13059.5										1627	143.359	129.423	422.828	147.13	130.595
1628	14358	12910.1	42253.1	14796.1	12965.5										1628	143.58	129.101	422.531	147.961	129.655
1629	14404.7	12898.1	42380.9	14684.1	12924.3										1629	144.047	128.981	423.809	146.841	129.243
1630	14321.5	12869	42379.3	14712.6	13006.9										1630	143.215	128.69	423.793	147.126	130.069
1631	14364.6	12835.9	42473	14743.5	12996.3										1631	143.646	128.359	424.73	147.435	129.963
1632	14274.2	12847.8	42305.6	14757	12997.3										1632	142.742	128.478	423.056	147.57	129.973
1633	14321.2	12994.9	42179.5	14696.5	12988.6										1633	143.212	129.949	421.795	146.965	129.886
1634	14387.7	12858.4	42330	14795.8	13005.6										1634	143.877	128.584	423.3	147.958	130.056
1635	14384.6	12934.6	42226.5	14751.7	13006.3										1635	143.846	129.346	422.265	147.517	130.063
1636	14308.1	12918.2	42500.2	14781.9	12970.5										1636	143.081	129.182	425.002	147.819	129.705
1637	14337.9	12930.5	42227	14779.4	13036										1637	143.379	129.305	422.27	147.794	130.36
1638	14341.4	12906.2	42236.1	14764.6	13014.2										1638	143.414	129.062	422.361	147.646	130.142
1639	14327.3	12870.4	42342.1	14846.1	12927.2										1639	143.273	128.704	423.421	148.461	129.272
1640	14374	12866.2	42423.2	14815.8	13007.5										1640	143.74	128.662	424.233	148.158	130.075
1641	14398.9	12914.2	42247.7	14777	12973.4										1641	143.989	129.142	422.477	147.77	129.734
1642	14400.1	12986.3	42266.1	14705.4	13009										1642	144.001	129.863	422.661	147.054	130.09
1643	14359.3	12918.9	42086.2	14763.7	12979.8										1643	143.593	129.189	420.862	147.637	129.798
1644	14333.6	12956.4	42084.8	14750.7	12992.6										1644	143.336	129.564	420.848	147.507	129.926
1645	14266.8	12920.6	42143.5	14758.2	12962.6										1645	142.668	129.206	421.435	147.582	129.626
1646	14353.1	12935.1	42223.3	14766.9	13057.5										1646	143.531	129.351	422.233	147.669	130.575
1647	14475.8	13023.8	42121.9	14847.6	13037.7										1647	144.758	130.238	421.219	148.476	130.377
1648	14364.1	12882	42191.4	14769.3	13006.5										1648	143.641	128.82	421.914	147.693	130.065
1649	14408	13006.4	42099	14699	13006.7										1649	144.08	130.064	420.99	146.99	130.067
1650	14421.7	12953.8	42152.3	14783.6	12979.1										1650	144.217	129.538	421.523	147.836	129.791
1651	14216.1	12915.6	42076.7	14793.8	13019										1651	142.161	129.156	420.767	147.938	130.19
1652	14386.7	12976.3	42046.3	14840.1	13011.5										1652	143.867	129.763	420.463	148.401	130.115
1653	14466	12954.6	42160.9	14794.2	13003.3										1653	144.66	129.546	421.609	147.942	130.033
1654	14369.7	12891.3	42146.6	14731.6	13019.7										1654	143.697	128.913	421.466	147.316	130.197
1655	14372.6	12966.6	42088.1	14753.2	13005.2										1655	143.726	129.666	420.881	147.532	130.052
1656	14359.9	12836.4	42148.8	14721.7	13007.4										1656	143.599	128.364	421.488	147.217	130.074
1657	14443.9	12869	42169.1	14747.6	12981.1										1657	144.439	128.69	421.691	147.476	129.811
1658	14398	12878.6	42191.9	14781.7	12949.6										1658	143.98	128.786	421.919	147.817	129.496
1659	14385.9	12874.1	42097.9	14724.6	12989.4										1659	143.859	128.741	420.979	147.246	129.894
1660	14433.7	12880.4	42042	14855	12996.5										1660	144.337	128.804	420.42	148.55	129.965
1661	14434	12982.9	41972.4	14786	13003.8										1661	144.34	129.829	419.724	147.86	130.038
1662	14358.3	12854.3	41965.3	14767.8	12988.7										1662	143.583	128.543	419.653	147.678	129.887
1663	14329.4	12944	42093.8	14780.9	12958.6										1663	143.294	129.44	420.938	147.809	129.586
1664	14351.1	12902.1	42060.3	14795.2	13020.9										1664	143.511	129.021	420.603	147.952	130.209
1665	14392	12919.9	42077.8	14761.3	12951.6										1665	143.92	129.199	420.778	147.613	129.516
1666	14318.9	12939.1	41941	14779.5	13030.3										1666	143.189	129.391	419.41	147.795	130.303
1667	14296.5	12906.1	42041.9	14791.9	12950.4										1667	142.965	129.061	420.419	147.919	129.504
1668	14387.9	12919.7	41850.3	14763.4	12963.3										1668	143.879	129.197	418.503	147.634	129.633
1669	14355.6	12924.4	41880.9	14763.2	12982.3										1669	143.556	129.244	418.809	147.632	129.823
1670	14359.6	12925	41937.8	14734.1	12996.8										1670	143.596	129.25	419.378	147.341	129.968
1671	14306.9	12871.3	42183.1	14698.4	12947.1										1671	143.069	128.713	421.831	146.984	129.471
1672	14362.4	12924.1	41824.3	14751.1	13031.5										1672	143.624	129.241	418.243	147.511	130.315
1673	14378.6	12889	41916.3	14743.3	12950.1										1673	143.786	128.89	419.163	147.433	129.501
1674	14384	12867.5	41955	14701.2	12995.1										1674	143.84	128.675	419.55	147.012	129.951
1675	14343.5	12919.5	41789.1	14745.4	13027.2										1675	143.435	129.195	417.891	147.454	130.272
1676	14374.7	12958	41949.6	14710.1	13067.6										1676	143.747	129.58	419.496	147.101	130.676
1677	14338.2	12891.3	41900.6	14849.7	12937.9										1677	143.382	128.913	419.006	148.497	129.379
1678	14339.3	12861.8	41855.6	14790.3	12925.9										1678	143.393	128.618	418.556	147.903	129.259
1679	14400.5	12936.7	41927.2	14875.5	12957.4										1679	144.005	129.367	419.272	148.755	129.574
1680	14416.5	12961.8	41923.3	14673.1	13015.2										1680	144.165	129.618	419.233	146.731	130.152
1681	14412.8	12897.2	41872.7	14813.3	13032.3										1681	144.128	128.972	418.727	148.133	130.323
1682	14333	12868.4	41857.3	14790.3	13022.5										1682	143.33	128.684	418.573	147.903	130.225
1683	14360.8	12921.4	41802.1	14759.4	13096.3										1683	143.608	129.214	418.021	147.594	130.963
1684	14446.8	12899.1	41925.9	14793.7	13007										1684	144.468	128.991	419.259	147.937	130.07
1685	14338.8	12904.2	41930.6	14725	13020										1685	143.388	129.042	419.306	147.25	130.2
1686	14412.4	12892.9	41842.6	14786.1	12921.2										1686	144.124	128.929	418.426	147.861	129.212
1687	14420.5	13034.3	41934.2	14677.9	12977.3										1687	144.205	130.343	419.342	146.779	129.773
1688	14411	12986.8	41820.5	14758.6	12992.5										1688	144.11	129.868	418.205	147.586	129.925
1689	14421	12877.1	41907.8	14695.7	12962.2										1689	144.21	128.771	419.078	146.957	129.622
1690	14328.5	12904.6	41695.1	14696.7	13001.5										1690	143.285	129.046	416.951	146.967	130.015
1691	14321.3	12942.7	41769.9	14719.4	13006.9										1691	143.213	129.427	417.699	147.194	130.069
1692	14346.8	12962.7	41720.5	14779.2	12941.3										1692	143.468	129.627	417.205	147.792	129.413
1693	14390	12847.7	41642.5	14806.2	13049.1										1693	143.9	128.477	416.425	148.062	130.491
1694	14394.8	12947.4	41720.1	14708.6	12989										1694	143.948	129.474	417.201	147.086	129.89
1695	14473	12998.3	41759.8	14769.9	12983.3										1695	144.73	129.983	417.598	147.699	129.833
1696	14366	12877.4	41850.5	14698.4	12970.6										1696	143.66	128.774	418.505	146.984	129.706
1697	14426.3	12903.9	41763.1	14753	13027.2										1697	144.263	129.039	417.631	147.53	130.272
1698	14407.6	13011.6	41668.3	14794.8	12974.9										1698	144.076	130.116	416.683	147.948	129.749
1699	14411.6	12958.5	41780.5	14708.2	12962.9										1699	144.116	129.585	417.805	147.082	129.629
1700	14383.8	12924.4	41749.4	14693.3	12983.7										1700	143.838	129.244	417.494	146.933	129.837
1701	14447.7	12902.9	41817.9	14761.5	13019.6										1701	144.477	129.029	418.179	147.615	130.196
1702	14368	12917.2	41740.9	14724.5	12919.8										1702	143.68	129.172	417.409	147.245	129.198
1703	14447.1	12892.6	41716.9	14768.5	13036.4										1703	144.471	128.926	417.169	147.685	130.364
1704	14356.1	12890	41701.9	14828	12919.2										1704	143.561	128.9	417.019	148.28	129.192
1705	14342.7	12928.8	41563.3	14766	12987.5										1705	143.427	129.288	415.633	147.66	129.875
1706	14423.3	12901.1	41644.8	14771.3	12974.8										1706	144.233	129.011	416.448	147.713	129.748
1707	14374.8	13015.3	41676.1	14723.6	12972										1707	143.748	130.153	416.761	147.236	129.72
1708	14332.1	12952.6	41596.8	14627.7	13000.2										1708	143.321	129.526	415.968	146.277	130.002
1709	14369.9	12914.2	41611.7	14724.2	12955.3										1709	143.699	129.142	416.117	147.242	129.553
1710	14376.1	12853.7	41617.9	14758.8	12980.9										1710	143.761	128.537	416.179	147.588	129.809
1711	14420.6	12921.8	41597.8	14751.8	12929.5										1711	144.206	129.218	415.978	147.518	129.295
1712	14365.1	12872.9	41623.7	14692.1	13020.9										1712	143.651	128.729	416.237	146.921	130.209
1713	14384.7	12996.8	41761.4	14806.2	12967.9										1713	143.847	129.968	417.614	148.062	129.679
1714	14301.9	12905.9	41795.7	14768.7	13071.8										1714	143.019	129.059	417.957	147.687	130.718
1715	14401.1	12947.8	41655.3	14805.5	12988										1715	144.011	129.478	416.553	148.055	129.88
1716	14348.2	12982.6	41652	14739.3	12977.8										1716	143.482	129.826	416.52	147.393	129.778
1717	14382.2	12960.1	41619	14711.1	12869.4										1717	143.822	129.601	416.19	147.111	128.694
1718	14356.7	12908.9	41552.7	14768.7	12981.7										1718	143.567	129.089	415.527	147.687	129.817
1719	14374.3	12911	41593.7	14774.4	13113.2										1719	143.743	129.11	415.937	147.744	131.132
1720	14338	12951.8	41494.8	14743.8	12965										1720	143.38	129.518	414.948	147.438	129.65
1721	14353.5	12891.1	41590.9	14737.9	13000										1721	143.535	128.911	415.909	147.379	130
1722	14331.3	13008.9	41496.3	14732	12951.4										1722	143.313	130.089	414.963	147.32	129.514
1723	14345.1	12914.7	41563.3	14820.9	12990.8										1723	143.451	129.147	415.633	148.209	129.908
1724	14400.3	12924.5	41542.7	14737.5	12955.7										1724	144.003	129.245	415.427	147.375	129.557
1725	14371	12888.1	41474	14791.2	13017.4										1725	143.71	128.881	414.74	147.912	130.174
1726	14396.4	12889.7	41530.8	14641.9	12963.7										1726	143.964	128.897	415.308	146.419	129.637
1727	14377.6	12858	41592.3	14783.2	12983.5										1727	143.776	128.58	415.923	147.832	129.835
1728	14302.4	12945.2	41541.3	14671.2	13048.6										1728	143.024	129.452	415.413	146.712	130.486
1729	14381.4	12914.5	41589.1	14601.5	12978.7										1729	143.814	129.145	415.891	146.015	129.787
1730	14454.1	12905.4	41645.5	14651.1	12946.7										1730	144.541	129.054	416.455	146.511	129.467
1731	14429.5	12837.8	41513.5	14718.8	12969.4										1731	144.295	128.377	415.135	147.188	129.694
1732	14336.4	12903.4	41516.3	14752.2	12978										1732	143.364	129.034	415.163	147.522	129.78
1733	14366.1	12901.9	41405.9	14697.1	12952.9										1733	143.661	129.019	414.059	146.971	129.529
1734	14366.4	12946	41440	14785.1	13019.4										1734	143.664	129.46	414.4	147.851	130.194
1735	14308.2	12964.2	41506.1	14647.6	12919.4										1735	143.082	129.642	415.061	146.476	129.194
1736	14399.3	12951.8	41433.7	14811.9	12958										1736	143.993	129.518	414.337	148.119	129.58
1737	14397.3	12892.7	41562.9	14720.7	13037.7										1737	143.973	128.927	415.629	147.207	130.377
1738	14319.4	12995.5	41605	14780.5	12964.6										1738	143.194	129.955	416.05	147.805	129.646
1739	14464.2	12887.6	41592.6	14759.8	12964.3										1739	144.642	128.876	415.926	147.598	129.643
1740	14337.9	12889.4	41533.4	14763	13023.1										1740	143.379	128.894	415.334	147.63	130.231
1741	14441.7	12904.4	41457.2	14771.9	12980.5										1741	144.417	129.044	414.572	147.719	129.805
1742	14247.1	12928.5	41309.3	14800.5	12955.3										1742	142.471	129.285	413.093	148.005	129.553
1743	14362.3	12882.4	41445.3	14810.5	13002.3										1743	143.623	128.824	414.453	148.105	130.023
1744	14341	12862.5	41481.5	14819	12982.1										1744	143.41	128.625	414.815	148.19	129.821
1745	14453.3	12881.3	41393.8	14726.2	12980.6										1745	144.533	128.813	413.938	147.262	129.806
1746	14407.2	12900.9	41371.9	14741.6	12974.8										1746	144.072	129.009	413.719	147.416	129.748
1747	14333.2	12912.4	41508.3	14689.8	12957.6										1747	143.332	129.124	415.083	146.898	129.576
1748	14409.2	12950	41474	14782.1	12986										1748	144.092	129.5	414.74	147.821	129.86
1749	14405.7	12914.2	41341.3	14756.1	13000										1749	144.057	129.142	413.413	147.561	130
1750	14419.9	12923.3	41419.8	14695	12993.6										1750	144.199	129.233	414.198	146.95	129.936
1751	14354	12890.2	41464.8	14691.1	13038.2										1751	143.54	128.902	414.648	146.911	130.382
1752	14449	12941.1	41426.6	14724.7	13023.8										1752	144.49	129.411	414.266	147.247	130.238
1753	14437.5	12956.4	41409.7	14684.8	12944.1										1753	144.375	129.564	414.097	146.848	129.441
1754	14347.5	12917.7	41271.3	14756.4	12918.1										1754	143.475	129.177	412.713	147.564	129.181
1755	14406.7	12940.6	41307.7	14779.7	12967.1										1755	144.067	129.406	413.077	147.797	129.671
1756	14365.7	12873.5	41302.3	14712	13012.3										1756	143.657	128.735	413.023	147.12	130.123
1757	14312.9	12928.1	41381.1	14767.6	12952.9										1757	143.129	129.281	413.811	147.676	129.529
1758	14368.1	12813.3	41224.5	14699.7	12981.7										1758	143.681	128.133	412.245	146.997	129.817
1759	14441.8	12894.9	41264.8	14830.8	13018.5										1759	144.418	128.949	412.648	148.308	130.185
1760	14469.6	12961.8	41252.7	14691.8	13055										1760	144.696	129.618	412.527	146.918	130.55
1761	14443.2	12870.1	41304.8	14754.2	12988.6										1761	144.432	128.701	413.048	147.542	129.886
1762	14343.8	12810.1	41333.1	14803.5	12955.4										1762	143.438	128.101	413.331	148.035	129.554
1763	14402.2	12889.3	41256.6	14704.6	12994.7										1763	144.022	128.893	412.566	147.046	129.947
1764	14335.2	12897.9	41144.6	14699.1	13033.6										1764	143.352	128.979	411.446	146.991	130.336
1765	14382.5	12990.8	41255.2	14738.3	12957.9										1765	143.825	129.908	412.552	147.383	129.579
1766	14367.7	12868.2	41346.9	14714	12936										1766	143.677	128.682	413.469	147.14	129.36
1767	14363.7	12906.8	41149.5	14696.9	13015.4										1767	143.637	129.068	411.495	146.969	130.154
1768	14414.4	13024.7	41256.8	14682.3	13042.9										1768	144.144	130.247	412.568	146.823	130.429
1769	14329.4	12948.4	41264.9	14712.3	13007.5										1769	143.294	129.484	412.649	147.123	130.075
1770	14403.8	12936.8	41196.9	14708.9	13006.2										1770	144.038	129.368	411.969	147.089	130.062
1771	14293.3	12890.3	41266.2	14695.6	12971.9										1771	142.933	128.903	412.662	146.956	129.719
1772	14450.3	12925.2	41283.5	14790.9	13003										1772	144.503	129.252	412.835	147.909	130.03
1773	14387.8	12909	41260.3	14712.1	12951.7										1773	143.878	129.09	412.603	147.121	129.517
1774	14369.1	12936.1	41218.2	14734.3	12962.8										1774	143.691	129.361	412.182	147.343	129.628
1775	14347	12876.2	41100.1	14792	12983.3										1775	143.47	128.762	411.001	147.92	129.833
1776	14415.3	12911	41282.2	14788.1	12991.8										1776	144.153	129.11	412.822	147.881	129.918
1777	14389.8	12859.3	41205	14744.3	13042.8										1777	143.898	128.593	412.05	147.443	130.428
1778	14358.3	12916.9	41306.2	14762.6	13008.4										1778	143.583	129.169	413.062	147.626	130.084
1779	14423.2	12938.4	41100.2	14715.5	12946.1										1779	144.232	129.384	411.002	147.155	129.461
1780	14360.2	12953.5	41159.9	14708.2	13016.1										1780	143.602	129.535	411.599	147.082	130.161
1781	14362.2	12947.4	41117.7	14696.8	13001.5										1781	143.622	129.474	411.177	146.968	130.015
1782	14364.8	12874.3	41155.3	14645.1	12923.3										1782	143.648	128.743	411.553	146.451	129.233
1783	14410.4	12923.6	41271.3	14758.4	12962.6										1783	144.104	129.236	412.713	147.584	129.626
1784	14322.2	12958.2	41126.3	14689.7	12983.5										1784	143.222	129.582	411.263	146.897	129.835
1785	14306	12936.9	41134.2	14726.3	12954.9										1785	143.06	129.369	411.342	147.263	129.549
1786	14333.5	12885.9	41149	14795	12997										1786	143.335	128.859	411.49	147.95	129.97
1787	14397.9	12942.1	41281.5	14764.4	12988.7										1787	143.979	129.421	412.815	147.644	129.887
1788	14375.8	12871.7	41204.3	14704.6	12924.8										1788	143.758	128.717	412.043	147.046	129.248
1789	14336.2	12867.3	41124.6	14768.6	13001										1789	143.362	128.673	411.246	147.686	130.01
1790	14296	12987.1	41227.4	14741.3	13034.9										1790	142.96	129.871	412.274	147.413	130.349
1791	14316	12937.7	41168.2	14774.5	13072.3										1791	143.16	129.377	411.682	147.745	130.723
1792	14405.8	12918.3	41068.1	14753	12971.4										1792	144.058	129.183	410.681	147.53	129.714
1793	14279.9	12902.9	41085.3	14693.6	13002.7										1793	142.799	129.029	410.853	146.936	130.027
1794	14414.3	13017.6	41107.2	14779.8	13031										1794	144.143	130.176	411.072	147.798	130.31
1795	14347.8	12838.1	41120.1	14718.4	12955.1										1795	143.478	128.381	411.201	147.184	129.551
1796	14332.7	12912.6	41122.3	14703.9	12970.2										1796	143.327	129.126	411.223	147.039	129.702
1797	14332.1	12893.5	41020.6	14712.3	12974										1797	143.321	128.935	410.206	147.123	129.74
1798	14349.4	12955.4	41028.1	14754.5	13072.6										1798	143.494	129.554	410.281	147.545	130.726
1799	14312.2	12974.6	41107.6	14757.5	13056.9										1799	143.122	129.746	411.076	147.575	130.569
1800	14367.6	12907.2	41027	14669.9	12978.8										1800	143.676	129.072	410.27	146.699	129.788
1801	14387.8	12990.9	41182.2	14734.6	13024.8										1801	143.878	129.909	411.822	147.346	130.248
1802	14444.4	12955.2	41077.3	14722.5	13008.2										1802	144.444	129.552	410.773	147.225	130.082
1803	14338.8	12864.1	40992.9	14699.7	13002.2										1803	143.388	128.641	409.929	146.997	130.022
1804	14358.4	12910.1	41011.6	14800.5	13090.3										1804	143.584	129.101	410.116	148.005	130.903
1805	14344	12948.7	40997.7	14705.2	12934.1										1805	143.44	129.487	409.977	147.052	129.341
1806	14316.6	12993.1	40939.1	14723.2	12977.7										1806	143.166	129.931	409.391	147.232	129.777
1807	14334	12936.8	40903.3	14710.7	12953.8										1807	143.34	129.368	409.033	147.107	129.538
1808	14358.8	12926.1	40934.5	14673.4	13005.4										1808	143.588	129.261	409.345	146.734	130.054
1809	14306.3	12991	40927.1	14703.8	13059.1										1809	143.063	129.91	409.271	147.038	130.591
1810	14325.2	12919.5	40929.6	14667.2	12940.9										1810	143.252	129.195	409.296	146.672	129.409
1811	14410.9	12911.8	40917.6	14727.7	12980										1811	144.109	129.118	409.176	147.277	129.8
1812	14344.5	12920.4	41002.3	14742.2	13014.4										1812	143.445	129.204	410.023	147.422	130.144
1813	14383.5	12928.5	40902.9	14706.6	12985.3										1813	143.835	129.285	409.029	147.066	129.853
1814	14415.2	12842.3	40825.7	14718.8	12988										1814	144.152	128.423	408.257	147.188	129.88
1815	14452.7	12862.8	40939.8	14708.1	12973.2										1815	144.527	128.628	409.398	147.081	129.732
1816	14414.1	12919.8	40908.7	14698	13022.4										1816	144.141	129.198	409.087	146.98	130.224
1817	14383.5	12964.5	40889.9	14727.7	13017.6										1817	143.835	129.645	408.899	147.277	130.176
1818	14328.4	12916	40943.3	14706.7	12978.2										1818	143.284	129.16	409.433	147.067	129.782
1819	14319.4	12960.7	40930.5	14662.9	12941										1819	143.194	129.607	409.305	146.629	129.41
1820	14413.7	12979.9	40963.2	14684.2	13017.7										1820	144.137	129.799	409.632	146.842	130.177
1821	14344.2	12937.3	41021.3	14714.7	12972.2										1821	143.442	129.373	410.213	147.147	129.722
1822	14397.6	12961.1	40807.4	14668.7	12927.2										1822	143.976	129.611	408.074	146.687	129.272
1823	14351.9	12915.8	40883	14715.5	12953.1										1823	143.519	129.158	408.83	147.155	129.531
1824	14316.7	12914.9	40812.7	14668.3	12916.2										1824	143.167	129.149	408.127	146.683	129.162
1825	14435.8	12965.3	40792.2	14689.2	12966.2										1825	144.358	129.653	407.922	146.892	129.662
1826	14348.8	12842.7	40833.4	14717.3	12994.4										1826	143.488	128.427	408.334	147.173	129.944
1827	14395.1	12916.9	40802.7	14726.3	13024.9										1827	143.951	129.169	408.027	147.263	130.249
1828	14338.6	12947.4	40929.8	14736.3	13026.7										1828	143.386	129.474	409.298	147.363	130.267
1829	14406.9	12969.1	40866.9	14613	12994.4										1829	144.069	129.691	408.669	146.13	129.944
1830	14310.3	12962.2	40869.6	14738.3	12908.5										1830	143.103	129.622	408.696	147.383	129.085
1831	14323	12938.9	40876.6	14686.6	12926.8										1831	143.23	129.389	408.766	146.866	129.268
1832	14417.2	12915.1	40887.6	14726	13023.4										1832	144.172	129.151	408.876	147.26	130.234
1833	14225.5	12912	40774.7	14702.3	13027.9										1833	142.255	129.12	407.747	147.023	130.279
1834	14403	12923.4	40910.3	14765.4	12929.4										1834	144.03	129.234	409.103	147.654	129.294
1835	14494.6	12917.7	40792.2	14691.7	12975.2										1835	144.946	129.177	407.923	146.917	129.752
1836	14307.7	12863.3	40752.3	14756.5	12950.6										1836	143.077	128.633	407.523	147.565	129.506
1837	14344.9	12909.9	40700.6	14735.3	12941.7										1837	143.449	129.099	407.006	147.353	129.417
1838	14410.4	12933.8	40766.8	14677.3	12923.2										1838	144.104	129.338	407.668	146.773	129.232
1839	14392.7	12856.8	40740.7	14714.6	13027.5										1839	143.927	128.568	407.407	147.146	130.275
1840	14396.4	12887.4	40701.2	14658.7	12956.2										1840	143.964	128.874	407.012	146.587	129.562
1841	14340.2	12882.1	40670.4	14712.6	12943.1										1841	143.402	128.821	406.704	147.126	129.431
1842	14348.9	12883.8	40745.5	14677.3	13043.3										1842	143.489	128.838	407.455	146.773	130.433
1843	14320.7	12889.5	40764.2	14668.3	13007.5										1843	143.207	128.895	407.642	146.683	130.075
1844	14403.9	12934.3	40834.7	14605	12945.2										1844	144.039	129.343	408.347	146.05	129.452
1845	14390.2	12946.5	40879.2	14662.9	13036.3										1845	143.902	129.465	408.792	146.629	130.363
1846	14346.5	12964.7	40707.1	14759.1	13053.3										1846	143.465	129.647	407.071	147.591	130.533
1847	14460.2	12884.2	40688.2	14722.6	12999										1847	144.602	128.842	406.882	147.226	129.99
1848	14365.1	12876.8	40703.8	14757	12930.6										1848	143.651	128.768	407.038	147.57	129.306
1849	14410	12920.1	40714.7	14693.6	12958.4										1849	144.1	129.201	407.147	146.936	129.584
1850	14390	12932.6	40804.9	14724.8	13049.3										1850	143.9	129.326	408.049	147.248	130.493
1851	14371.7	12904.2	40568.8	14689.2	12931.2										1851	143.717	129.042	405.688	146.892	129.312
1852	14340.8	12954.6	40745.1	14650	12980.3										1852	143.408	129.546	407.451	146.5	129.803
1853	14392.6	12898.5	40662.4	14694.5	13041.1										1853	143.926	128.985	406.624	146.945	130.411
1854	14340	12834.7	40873.4	14758.1	13014.1										1854	143.4	128.347	408.734	147.581	130.141
1855	14373.5	12888.7	40719.9	14643.7	12962.4										1855	143.735	128.887	407.199	146.437	129.624
1856	14367.3	12914.2	40545.7	14762.1	12956.8										1856	143.673	129.142	405.457	147.621	129.568
1857	14376.3	12987	40384	14704.3	12965.8										1857	143.763	129.87	403.84	147.043	129.658
1858	14432.4	12934.5	40723	14702.5	12995.7										1858	144.324	129.345	407.23	147.025	129.957
1859	14379.8	12920.2	40730	14740.2	13054										1859	143.798	129.202	407.3	147.402	130.54
1860	14433.5	12855.6	40626.9	14680.4	13050.2										1860	144.335	128.556	406.269	146.804	130.502
1861	14350.2	12897.5	40557.7	14719.9	12926.4										1861	143.502	128.975	405.577	147.199	129.264
1862	14386.7	12873.2	40625.5	14673.5	12959.3										1862	143.867	128.732	406.255	146.735	129.593
1863	14393.7	12929.9	40622.3	14702.3	12929.5										1863	143.937	129.299	406.223	147.023	129.295
1864	14280.2	12875.3	40657.5	14696.6	12945.6										1864	142.802	128.753	406.575	146.966	129.456
1865	14321.3	12894.4	40685.3	14695.8	12932.4										1865	143.213	128.944	406.853	146.958	129.324
1866	14414	12846.2	40585.7	14666.3	12948										1866	144.14	128.462	405.857	146.663	129.48
1867	14363.9	12888.3	40583.4	14709.7	13013.2										1867	143.639	128.883	405.834	147.097	130.132
1868	14390.1	12933.1	40701.8	14696.7	13014.3										1868	143.901	129.331	407.018	146.967	130.143
1869	14360.9	12868.9	40612.1	14712.6	13036.1										1869	143.609	128.689	406.121	147.126	130.361
1870	14396.4	12858.9	40658.2	14606.7	13006.3										1870	143.964	128.589	406.582	146.067	130.063
1871	14414.5	12934.2	40536.3	14701.8	13075.5										1871	144.145	129.342	405.363	147.018	130.755
1872	14368.6	12883.2	40620.6	14690.2	12941.5										1872	143.686	128.832	406.206	146.902	129.415
1873	14338.5	12932.4	40543.8	14667.6	13000.9										1873	143.385	129.324	405.438	146.676	130.009
1874	14318.9	12927.3	40504.6	14642.7	13037.1										1874	143.189	129.273	405.046	146.427	130.371
1875	14376.8	12912.3	40699.2	14673.7	12935.6										1875	143.768	129.123	406.993	146.737	129.356
1876	14303.3	12909.2	40568.4	14619.1	12984.1										1876	143.033	129.092	405.684	146.191	129.841
1877	14337.9	12870.5	40599.6	14720.8	12989.3										1877	143.379	128.705	405.996	147.208	129.893
1878	14406.5	12903.3	40480	14629.7	12910.3										1878	144.065	129.033	404.8	146.297	129.103
1879	14269.7	12953.9	40576.1	14783.1	12938.2										1879	142.697	129.539	405.761	147.831	129.382
1880	14397.9	12908.4	40570.4	14800.1	12946										1880	143.979	129.084	405.704	148.001	129.46
1881	14365.7	12785.4	40557	14706.3	13060.9										1881	143.657	127.854	405.57	147.063	130.609
1882	14287.3	12916.8	40604.7	14635.8	12990.3										1882	142.873	129.168	406.047	146.358	129.903
1883	14336.9	12910.1	40434.7	14661.1	13028.7										1883	143.369	129.101	404.347	146.611	130.287
1884	14343.1	12991.2	40461.2	14725.7	12992.8										1884	143.431	129.912	404.612	147.257	129.928
1885	14341.1	12919.8	40460.2	14729.1	12922.1										1885	143.411	129.198	404.602	147.291	129.221
1886	14269.1	12885.1	40533.4	14664	12991.6										1886	142.691	128.851	405.334	146.64	129.916
1887	14343.7	12882.9	40525.6	14670.6	12992.4										1887	143.437	128.829	405.256	146.706	129.924
1888	14366.2	12885	40445.6	14718.3	13003.1										1888	143.662	128.85	404.456	147.183	130.031
1889	14410.3	12951	40425.7	14649.1	12907.3										1889	144.103	129.51	404.257	146.491	129.073
1890	14324	12878.9	40501.8	14718.9	12965.5										1890	143.24	128.789	405.018	147.189	129.655
1891	14399	12862.3	40499.4	14740.9	12982.1										1891	143.99	128.623	404.994	147.409	129.821
1892	14385	12833	40498.7	14726.6	13028.2										1892	143.85	128.33	404.987	147.266	130.282
1893	14364.3	12884.2	40507.1	14683.8	12968.5										1893	143.643	128.842	405.071	146.838	129.685
1894	14410.6	12885.5	40389.5	14664.1	12930.6										1894	144.106	128.855	403.895	146.641	129.306
1895	14325.7	12844.7	40425.7	14689.7	13061										1895	143.257	128.447	404.257	146.897	130.61
1896	14382.8	12865.7	40480.1	14646.3	13045.4										1896	143.828	128.657	404.801	146.463	130.454
1897	14391.5	12959	40343.4	14696.5	12952.9										1897	143.915	129.59	403.434	146.965	129.529
1898	14308.9	12894	40484.6	14679.5	12959.4										1898	143.089	128.94	404.846	146.795	129.594
1899	14413.2	12952.2	40234.8	14740.6	12995.7										1899	144.132	129.522	402.348	147.406	129.957
1900	14285.2	12872.3	40461.6	14643.4	12991.6										1900	142.852	128.723	404.616	146.434	129.916
1901	14356.5	12853.3	40363.8	14655.2	12947.7										1901	143.565	128.533	403.638	146.552	129.477
1902	14408.9	12937.3	40378.7	14678.6	12997.3										1902	144.089	129.373	403.787	146.786	129.973
1903	14322.8	12890.9	40345.7	14726.9	12964.7										1903	143.228	128.909	403.457	147.269	129.647
1904	14349.7	12910.7	40402.5	14750.9	13078										1904	143.497	129.107	404.025	147.509	130.78
1905	14400.3	12825.1	40410.3	14681.2	12988.3										1905	144.003	128.251	404.103	146.812	129.883
1906	14374.7	12842.3	40455.2	14665.3	13043.8										1906	143.747	128.423	404.552	146.653	130.438
1907	14306	12936.2	40416.7	14712.9	13059.1										1907	143.06	129.362	404.167	147.129	130.591
1908	14397.6	12887.9	40287.1	14661.5	13032.9										1908	143.976	128.879	402.871	146.615	130.329
1909	14442.1	12913.3	40373.4	14674.3	12988.4										1909	144.421	129.133	403.734	146.743	129.884
1910	14267.9	12862.6	40297.1	14701.3	13012.5										1910	142.679	128.626	402.971	147.013	130.125
1911	14427.6	12931.7	40414.5	14669.4	12937.4										1911	144.276	129.317	404.145	146.694	129.374
1912	14240.4	12928.4	40332.3	14644.4	12938.7										1912	142.404	129.284	403.323	146.444	129.387
1913	14329.3	12943.6	40229.8	14632.6	13029.8										1913	143.293	129.436	402.298	146.326	130.298
1914	14335.7	12884.9	40233.7	14758.5	12920.2										1914	143.357	128.849	402.337	147.585	129.202
1915	14297.2	12916.6	40261.7	14690.5	12975.1										1915	142.972	129.166	402.617	146.905	129.751
1916	14318.3	12917.6	40287.1	14691.3	13016.4										1916	143.183	129.176	402.871	146.913	130.164
1917	14366.8	12880.5	40211.9	14630.3	13042.1										1917	143.668	128.805	402.119	146.303	130.421
1918	14336.4	12942.9	40267.1	14603.8	13030.2										1918	143.364	129.429	402.671	146.038	130.302
1919	14328	12892.3	40089.8	14675.3	12962.3										1919	143.28	128.923	400.898	146.753	129.623
1920	14343.2	12889.1	40169.3	14698	12953.7										1920	143.432	128.891	401.693	146.98	129.537
1921	14380.4	12832.4	40246.6	14673.2	12941.5										1921	143.804	128.324	402.466	146.732	129.415
1922	14343.9	12863.3	40311.2	14664.6	12902.1										1922	143.439	128.633	403.112	146.646	129.021
1923	14405.4	12928.9	40271.8	14616.4	12987.7										1923	144.054	129.289	402.718	146.164	129.877
1924	14406.7	12876.9	40248.7	14605.7	13005										1924	144.067	128.769	402.487	146.057	130.05
1925	14390.5	12893.9	40245.7	14666	12943.2										1925	143.905	128.939	402.457	146.66	129.432
1926	14335.8	12942.8	40239.2	14643.3	13025.5										1926	143.358	129.428	402.392	146.433	130.255
1927	14364.9	12933.4	40178.8	14650.1	12961.3										1927	143.649	129.334	401.788	146.501	129.613
1928	14362.6	12861	40248.1	14555.6	12918.8										1928	143.626	128.61	402.481	145.556	129.188
1929	14353.3	12872.1	40174.7	14631.7	12927.8										1929	143.533	128.721	401.747	146.317	129.278
1930	14379.5	12846.3	40181.9	14661.1	12930.4										1930	143.795	128.463	401.819	146.611	129.304
1931	14336.2	12924.5	40242.5	14611.4	13069.3										1931	143.362	129.245	402.425	146.114	130.693
1932	14420.3	12895.9	40095.2	14733.4	13055.3										1932	144.203	128.959	400.952	147.334	130.553
1933	14374.9	12917.3	40211.2	14662.4	13052.1										1933	143.749	129.173	402.112	146.624	130.521
1934	14382.4	12958.6	40066.2	14731.8	12909.5										1934	143.824	129.586	400.662	147.318	129.095
1935	14382.5	12867.3	40329.9	14629.7	12946.4										1935	143.825	128.673	403.299	146.297	129.464
1936	14411.4	12821.6	40203.6	14694.4	13052.5										1936	144.114	128.216	402.036	146.944	130.525
1937	14318.8	12916.7	40114.9	14696.2	12960.5										1937	143.188	129.167	401.149	146.962	129.605
1938	14353.2	12831.2	40141.5	14701.8	12976										1938	143.532	128.312	401.415	147.018	129.76
1939	14305.1	12953.4	40121.9	14710.2	12962.8										1939	143.051	129.534	401.219	147.102	129.628
1940	14332.4	12860.3	39948	14580.4	13005.2										1940	143.324	128.603	399.48	145.804	130.052
1941	14373.6	12906.6	40149.8	14655	12973.1										1941	143.736	129.066	401.498	146.55	129.731
1942	14357.5	12885.7	40074	14627.9	13002.3										1942	143.575	128.857	400.74	146.279	130.023
1943	14276.2	12838.5	40112.6	14672.2	13075.1										1943	142.762	128.385	401.126	146.722	130.751
1944	14292.9	12893.3	40191.1	14618.9	12924.6										1944	142.929	128.933	401.911	146.189	129.246
1945	14413.9	12854.9	39945.3	14666.1	13071.5										1945	144.139	128.549	399.453	146.661	130.715
1946	14344.2	12920.7	40087.3	14597.3	12952.4										1946	143.442	129.207	400.873	145.973	129.524
1947	14358.8	12869.8	40054.2	14615.6	13043.3										1947	143.588	128.698	400.542	146.156	130.433
1948	14376.3	12952.6	40185.8	14732.1	12995.9										1948	143.763	129.526	401.858	147.321	129.959
1949	14335.8	12960.2	40043.9	14616.5	13000.7										1949	143.358	129.602	400.439	146.165	130.007
1950	14380.3	12974.2	39979	14601.1	12993.9										1950	143.803	129.742	399.79	146.011	129.939
1951	14400.9	12941.1	40222.7	14656.8	12942.3										1951	144.009	129.411	402.227	146.568	129.423
1952	14437.7	12911.2	40018.1	14566.3	13030.2										1952	144.377	129.112	400.181	145.663	130.302
1953	14316.1	12896.3	39987.7	14659.3	12978.2										1953	143.161	128.963	399.877	146.593	129.782
1954	14355.3	12919.5	40082.2	14670.4	12999.9										1954	143.553	129.195	400.822	146.704	129.999
1955	14376.2	12804.7	40051.4	14738.7	13017.9										1955	143.762	128.047	400.514	147.387	130.179
1956	14363.7	12942.4	40031.6	14601.1	13024.6										1956	143.637	129.424	400.316	146.011	130.246
1957	14279.2	12896.4	40071.2	14698.2	13029.3										1957	142.792	128.964	400.712	146.982	130.293
1958	14405.8	12905.6	40076.9	14703.3	13050.6										1958	144.058	129.056	400.769	147.033	130.506
1959	14314.4	12903.8	40041.8	14689.7	13003.5										1959	143.144	129.038	400.418	146.897	130.035
1960	14313.4	12868	40123.2	14667.2	13031.1										1960	143.134	128.68	401.232	146.672	130.311
1961	14405.5	12973	40079.2	14704.5	12997.2										1961	144.055	129.73	400.792	147.045	129.972
1962	14388	12924.3	39936.7	14618	12993										1962	143.88	129.243	399.367	146.18	129.93
1963	14426.2	12941.4	40027.3	14634	13033.2										1963	144.262	129.414	400.273	146.34	130.332
1964	14367.8	12872	39985.9	14717.8	13004.8										1964	143.678	128.72	399.859	147.178	130.048
1965	14354.1	12915.6	40013.9	14709.7	13000.2										1965	143.541	129.156	400.139	147.097	130.002
1966	14327.3	12907.7	40154.1	14650.3	12952										1966	143.273	129.077	401.541	146.503	129.52
1967	14364.1	12964.4	40085.7	14642.2	12999.4										1967	143.641	129.644	400.857	146.422	129.994
1968	14405.7	12897.3	39978.8	14706.1	12993.7										1968	144.057	128.973	399.788	147.061	129.937
1969	14316.4	12887.4	40002.5	14623.4	12912.4										1969	143.164	128.874	400.025	146.234	129.124
1970	14359.3	12911	39912.9	14715.3	13028.7										1970	143.593	129.11	399.129	147.153	130.287
1971	14314.6	12810.9	39939.3	14666.1	13023.4										1971	143.146	128.109	399.393	146.661	130.234
1972	14331.3	12843.9	39907.5	14703.9	12991.7										1972	143.313	128.439	399.075	147.039	129.917
1973	14371.1	12846	39972.2	14670.6	13046										1973	143.711	128.46	399.722	146.706	130.46
1974	14437.8	12873.1	39878.1	14683.6	13015										1974	144.378	128.731	398.781	146.836	130.15
1975	14356	12917.7	39956.8	14682.3	13069.9										1975	143.56	129.177	399.568	146.823	130.699
1976	14331.6	12851.8	39986.1	14640.6	12939.6										1976	143.316	128.518	399.861	146.406	129.396
1977	14351.1	12900.4	39838.1	14616.6	13014										1977	143.511	129.004	398.381	146.166	130.14
1978	14422.3	12976.6	39981	14652.3	12995.9										1978	144.223	129.766	399.81	146.523	129.959
1979	14295	12851.3	39939.4	14641.3	12978.3										1979	142.95	128.513	399.394	146.413	129.783
1980	14368.9	12917	39899.2	14607	13021.3										1980	143.689	129.17	398.992	146.07	130.213
1981	14392	12874.6	39849.2	14789.4	12923.2										1981	143.92	128.746	398.492	147.894	129.232
1982	14411.6	12882	39827.3	14696.5	13007.7										1982	144.116	128.82	398.273	146.965	130.077
1983	14401.1	12835.3	39949.6	14702.9	12945.1										1983	144.011	128.353	399.496	147.029	129.451
1984	14426.4	12932.7	39931.8	14650.8	12990.9										1984	144.264	129.327	399.318	146.508	129.909
1985	14292.5	12920.8	39929.6	14581.9	13040.1										1985	142.925	129.208	399.296	145.819	130.401
1986	14396	12895.5	39739	14632.3	12940.1										1986	143.96	128.955	397.39	146.323	129.401
1987	14389.4	12842	39756.6	14682.8	12990.7										1987	143.894	128.42	397.566	146.828	129.907
1988	14322.6	12904.8	39841.8	14665.3	13007.7										1988	143.226	129.048	398.418	146.653	130.077
1989	14347.7	12924.8	39861.5	14585.3	12980										1989	143.477	129.248	398.615	145.853	129.8
1990	14389.8	12847.7	39882.7	14708.4	13083.4										1990	143.898	128.477	398.827	147.084	130.834
1991	14347.5	12916.6	39831.8	14696.6	12964.2										1991	143.475	129.166	398.318	146.966	129.642
1992	14327.5	12941	39994.9	14621.4	13009.7										1992	143.275	129.41	399.949	146.214	130.097
1993	14378.4	12904.5	39869.7	14658.8	12994.3										1993	143.784	129.045	398.697	146.588	129.943
1994	14417.6	12878.7	39982.2	14663.5	12988.1										1994	144.176	128.787	399.822	146.635	129.881
1995	14425.1	12937.8	39852.8	14622.2	13028.4										1995	144.251	129.378	398.528	146.222	130.284
1996	14351.2	12876.1	39726.6	14584.1	13052.5										1996	143.512	128.761	397.266	145.841	130.525
1997	14333.7	12911.8	39787	14688.6	12985										1997	143.337	129.118	397.87	146.886	129.85
1998	14433.8	12810.5	39950	14660.7	12954.1										1998	144.338	128.105	399.5	146.607	129.541
[truncated: 2,203 more rows]

## Sheet: Sheet2
Time(s)	Dapt only	Dapt+Ca	41.16 uM DMPG:166.67uM DMPC	41.16 uM Card:166.67uM DMPC	41.16 uM POPS:166.67uM DMPC
0	15044.5	13656.9	75072.3	134485	22818
1	14980	13647.4	76212.7	134371	22881.9
2	14904.1	13667.5	77401.9	134037	22896.1
3	14946.6	13729.2	78192.6	134136	22774
4	14938.7	13672.2	79332.6	133651	22723.4
5	14974.2	13625.6	80203	133369	22797.8
6	14972.1	13712.8	81502.8	133079	22785.9
7	14958.3	13649.2	82472	133018	22761.1
8	14975.7	13541.9	83405	132769	22652.3
9	14907.9	13714	84672.3	132657	22688.4
10	14866.2	13538.2	85696.4	132323	22752.9
11	14832.6	13643	86835.5	132235	22558.2
12	14911.2	13554.5	87777.1	131830	22605.5
13	14876.7	13583.7	88934	131915	22531.1
14	14909.5	13569.7	89848.3	131519	22527.1
15	14879.5	13542	91045.5	131124	22543.6
16	14863.9	13570.9	92194.4	130930	22479.3
17	14925.8	13637.4	93172	130732	22546.9
18	14980.4	13565.6	94577.1	130525	22566.5
19	14833.7	13508.5	95651.2	130248	22423.8
20	14907.2	13514.8	96814.5	130188	22399.8
21	14826.7	13566.3	97941.9	129927	22394.9
22	14868.4	13447.4	99255.8	129913	22343.8
23	14856.8	13499.8	100338	129584	22334.7
24	14837.5	13427.8	101503	129463	22370.5
25	14879.6	13397.7	102567	129214	22292.3
26	14892.4	13412.9	103820	129061	22308.4
27	14791.4	13429.2	105247	129061	22220.2
28	14829.5	13433	106155	128938	22222.6
29	14850.1	13482.3	107712	128696	22204.6
30	14868	13457.3	108877	128380	22226.7
31	14897.2	13402.4	110109	128604	22180.9
32	14853.8	13374.7	111482	128162	22071
33	14865	13429.7	112564	128083	22167
34	14905.7	13403.7	113651	127769	22148.1
35	14772.1	13441	115308	127631	22050.6
36	14769.1	13406.1	116428	127580	22042.1
37	14853.2	13372.5	118025	127181	22073.8
38	14833.2	13387	119121	127240	22083.9
39	14716.5	13299.4	120550	127125	22042.7
40	14771.1	13334.4	121691	126927	21935.5
41	14800.4	13385.3	123156	126802	21954.2
42	14883.5	13310.3	124213	126435	21918.7
43	14800.8	13440	125667	126375	21935.5
44	14848.5	13362.6	126741	126234	21905.9
45	14834.9	13320.2	127935	126294	22016.3
46	14822.8	13320.1	129391	126380	21871.8
47	14871.4	13318.1	130500	125919	21869.7
48	14709.9	13332.7	132011	125985	21837.1
49	14812.4	13360.7	133200	125844	21769.4
50	14837.2	13343.7	134513	125315	21799.6
51	14796.9	13338.9	135754	125760	21776.9
52	14790.9	13339.2	137154	125547	21788
53	14791.5	13261.3	138490	125415	21824.1
54	14785	13316.2	139763	125152	21727.9
55	14758	13343.1	140819	124855	21804.4
56	14814.7	13367.9	142123	124955	21706.5
57	14803.8	13393.7	143447	124792	21800.1
58	14773	13209	144812	124698	21793.2
59	14814.6	13294.6	146110	124379	21757.4
60	14700.6	13316.2	147054	124370	21639.7
61	14765.9	13318.3	148296	124319	21626.5
62	14715.5	13314.7	149863	124119	21654.7
63	14802	13242.7	150745	124263	21621.6
64	14841.1	13281.4	152151	124214	21723.2
65	14816.9	13311.9	153300	124102	21719.4
66	14764.8	13276.9	154579	123866	21623.8
67	14790.9	13224.9	155493	123811	21667.9
68	14828.2	13247.8	157045	123473	21636.1
69	14708.1	13228.3	157967	123435	21546.9
70	14748.6	13246.8	159257	123730	21630.5
71	14785.1	13296.5	160432	123398	21596.9
72	14740.8	13202.2	161561	123418	21639.4
73	14787.6	13221.6	162424	123329	21529.9
74	14729	13260.7	163802	123043	21682.7
75	14739.1	13283	164844	123007	21639.3
76	14699.2	13247.3	166219	123149	21566.9
77	14759.3	13235.1	167230	122815	21558.8
78	14737.2	13232.5	168201	122541	21597.6
79	14770.7	13247.3	169257	122669	21579.3
80	14748	13319.4	170195	122468	21510.6
81	14785.9	13210.2	171362	122606	21560.7
82	14756.8	13212.7	172385	122507	21444.9
83	14684.2	13230.7	173325	122319	21535.7
84	14754.6	13271.1	174383	121958	21457.2
85	14778.1	13192.4	175703	122142	21529.3
86	14742.4	13203.8	176721	122028	21519.6
87	14717.4	13172.5	177702	121823	21424.5
88	14733.7	13189.1	178628	121801	21475.7
89	14721.3	13203.2	179706	121789	21455.7
90	14727.3	13194.2	180321	121593	21489
91	14718.5	13253.7	181521	121568	21478.9
92	14723.7	13153.2	182361	121599	21501.8
93	14763.5	13243.6	183959	121448	21443.6
94	14713.6	13168.1	184514	121423	21433.3
95	14737.3	13236.5	185322	121182	21345.6
96	14732.4	13164.8	186385	121426	21483
97	14749.9	13146.4	187594	121288	21484.1
98	14762.7	13196.5	188271	121224	21473.3
99	14745.2	13188.4	189132	121167	21413.9
100	14745.4	13242.9	190034	121110	21519.3
101	14732.6	13206.5	190752	121009	21442.2
102	14664	13210.3	191676	121012	21483.7
103	14743.9	13182.4	192642	120713	21547.7
104	14784.7	13196.6	193742	120907	21402.2
105	14737.9	13161.7	194363	120786	21546.2
106	14705	13197.4	195246	120670	21451.5
107	14763.4	13237.5	195935	120695	21468
108	14707.7	13191	196769	120451	21451.1
109	14733.7	13218.5	197618	120271	21431.5
110	14738	13200.5	198465	120199	21503.5
111	14703.3	13166.6	199142	120185	21461
112	14685	13168.9	200073	120485	21522.6
113	14708.5	13157.7	201099	120076	21436
114	14705.3	13195.2	201612	120157	21423.1
115	14664	13175.4	202084	120148	21505
116	14815.8	13120.3	203352	120091	21433.4
117	14706	13208.6	203974	119744	21438
118	14777.8	13247	204613	119978	21530.8
119	14782.7	13206.5	205213	119901	21604.9
120	14733.7	13150.7	206047	119834	21393.3
121	14708.4	13212.6	207109	119582	21447.7
122	14734	13261.2	207589	119615	21482.9
123	14704.5	13162.1	208176	119643	21417.1
124	14681.2	13095.7	208793	119581	21476.8
125	14673.2	13220.2	209518	119106	21453
126	14652	13261.9	210288	119446	21438.9
127	14797.4	13221.7	210813	119267	21448.9
128	14729.8	13205.7	211660	119398	21444.7
129	14658.4	13145.1	212049	119342	21437.5
130	14681	13203.7	212991	119199	21542.7
131	14785.3	13126.2	213447	119272	21437.9
132	14706.6	13148.5	213984	119180	21411.9
133	14675.1	13114.7	214950	119034	21500.3
134	14741.9	13148.7	215123	119167	21360.5
135	14752.4	13187.8	215949	119054	21437.4
136	14699	13171.6	216648	118892	21482.6
137	14627.9	13177.2	217225	119393	21423.9
138	14695.8	13123.8	218026	118694	21528.9
139	14697	13180.8	218667	118885	21457.4
140	14620.7	13209.4	219081	118656	21465.2
141	14684	13119.6	220019	118594	21420.6
142	14624.1	13120.5	220354	118671	21528.5
143	14725.7	13183.3	220694	118479	21438.6
144	14734.9	13147.4	221307	118415	21491.8
145	14647.3	13161.9	221844	118553	21589.2
146	14728.1	13132.7	222318	118594	21486.5
147	14674.2	13167.1	223141	118458	21382.7
148	14715.5	13150.1	223767	118571	21581.1
149	14705.9	13218.3	224487	118419	21492.5
150	14663.7	13211.2	224767	118263	21488.2
151	14679.9	13207	225290	118342	21383.4
152	14707.7	13226.9	225711	118176	21479.8
153	14596.5	13142.1	226236	118311	21407.3
154	14714.1	13143.5	226826	118540	21483.9
155	14696.2	13151.2	227127	118212	21544.3
156	14598.9	13127.1	227870	118022	21482.3
157	14717.7	13096.9	228402	118232	21491.3
158	14658.8	13105.5	228888	118217	21508.1
159	14651.6	13160.6	229165	118204	21516
160	14656.1	13080.6	229662	118009	21528.9
161	14655.1	13115.7	230118	118098	21405.5
162	14682.2	13121.7	230635	117842	21585.6
163	14782.4	13094.7	231429	117774	21501.8
164	14624.5	13167.5	231433	117744	21532.8
165	14658.8	13190.1	232279	117979	21587.8
166	14682.2	13119.4	232547	117657	21540.1
167	14735.4	13176.9	232847	117554	21547.7
168	14709.3	13101.5	233529	117678	21468.7
169	14660.4	13084.3	233943	117836	21509.1
170	14626.5	13167.2	234169	117585	21547.1
171	14713.9	13070.2	234561	117587	21573.8
172	14671.4	13122.7	234904	117551	21596.4
173	14697.6	13148.9	235403	117729	21544.7
174	14638	13243.2	236159	117571	21537.4
175	14632.7	13144.5	236353	117347	21520.8
176	14650.8	13148.9	237005	117333	21545
177	14674.7	13237.5	236982	117224	21545.1
178	14684.3	13114.8	237590	117233	21501.1
179	14653.9	13230.4	238140	117171	21501.5
180	14597.7	13115.6	238440	117529	21510.2
181	14629.9	13163.1	238782	117185	21578.8
182	14611.8	13156.5	239280	117230	21516.4
183	14634.1	13029.1	239718	117024	21587.3
184	14703.6	13160.4	239777	117202	21620.6
185	14693.8	13138.6	240305	117065	21599.7
186	14669.2	13136.5	240898	117126	21573.2
187	14682.2	13075.1	240950	116827	21479.2
188	14673.1	13144	241276	117154	21563.8
189	14667.2	13105.7	241503	117057	21638.1
190	14567.1	13061.9	242054	117103	21548
191	14665.5	13165.7	242371	117054	21557.2
192	14600.9	13146.9	242714	117037	21594.9
193	14701	13145.2	243234	116897	21553.7
194	14594.5	13171.2	243423	116784	21725.1
195	14628.5	13168.9	243652	116889	21575.7
196	14648.6	13086.9	244226	116858	21667.5
197	14668.1	13134	244161	116767	21615.4
198	14639	13075.6	244805	116672	21638
199	14607.1	13134.1	245256	116673	21644.4
200	14621	13170.9	245436	116636	21620.3
201	14715.1	13078.5	245797	116736	21696.8
202	14594.9	13126.6	246529	116613	21708.1
203	14687.5	13065.8	246503	116506	21636.1
204	14712.2	13149.3	246795	116493	21563.5
205	14621.6	13158	246980	116365	21658.5
206	14594.1	13103.6	247210	116609	21742.1
207	14616.5	13149.8	248025	116483	21687.4
208	14582.7	13157.7	247969	116659	21726.3
209	14604.3	13090.5	248325	116483	21718.9
210	14594.9	13111.6	248902	116347	21607.6
211	14673.4	13138.1	248752	116422	21811
212	14616.8	13125.3	249032	116193	21655.7
213	14682.5	13148.5	249378	116165	21732.7
214	14679.2	13178.6	249689	116468	21818.9
215	14586.7	13124.3	249975	116356	21671.8
216	14599	13117.9	250214	116104	21612
217	14532.3	13123.8	250900	116252	21864.7
218	14579.5	13113.1	251010	116157	21753.1
219	14592.9	13122.8	251105	116348	21788
220	14600.3	13171.7	251280	116331	21738.3
221	14583.8	13076.5	251841	116036	21826
222	14636.6	13097.7	251886	116034	21723.5
223	14591.3	13037.6	252359	115906	21918.4
224	14625.3	13110.9	252629	116295	21818.7
225	14658.6	13087.1	252506	115957	21843.1
226	14633.6	13115.2	253245	115854	21740.8
227	14564	13100.6	252977	116004	21784.3
228	14621.5	13100.1	253458	115972	21851.4
229	14664.5	13064.2	253543	115906	21939.6
230	14592.2	13034.5	254192	115934	21835.4
231	14633.1	13032.6	254199	115970	21914.1
232	14718.7	13148.2	254385	115923	21775.1
233	14582.1	13117.6	255018	115742	21822.1
234	14641.6	13086.8	254902	115686	21942.8
235	14630.3	13122.4	255230	115687	21992.8
236	14551	13134.6	255154	115812	21908.9
237	14645.5	13061.6	255621	116004	21932.1
238	14585.4	13028.8	256099	115989	21946.4
239	14600.5	13072.7	256130	115727	21890.3
240	14645.5	13040.3	256292	115868	21990.7
241	14616	13124.6	256739	115808	21974.1
242	14597.5	13068.8	256793	115543	21944.1
243	14655.1	13107.6	256711	115511	22022
244	14626.9	13092.7	257161	115577	21923.5
245	14607.4	13033.7	257452	115661	22085.4
246	14658.7	13166.1	257783	115596	21954.5
247	14665	13159.3	257735	115584	22034.5
248	14588	13078.9	258157	115716	22046
249	14583.2	13148.6	258339	115382	22046.2
250	14538.2	13102.3	258509	115470	21988.6
251	14648.1	13107.8	258528	115175	21991.2
252	14602.2	13063.8	258808	115440	22008.6
253	14571.5	13121.1	259265	115302	22078.9
254	14571.9	13085.3	259324	115261	22148
255	14594.1	13136.1	259148	115544	22067.2
256	14646.1	13085.4	259616	115350	22118.2
257	14612.9	13164	259775	115449	22003.8
258	14572.8	13146.8	259970	115350	22051.9
259	14666.9	13102	260205	115328	22237.8
260	14595	13136.3	260506	115121	22113.9
261	14623.7	13105.1	260319	115442	22012.7
262	14604.3	13138.2	260432	115354	22097.5
263	14606.8	13061	260878	115340	22061.4
264	14620.7	13073.5	260804	115240	22058.5
265	14579.5	13019	261046	115264	22075.9
266	14638.4	13075.2	261406	115066	22077.4
267	14632.3	13068	261312	115145	22158
268	14608.8	13154.4	262076	115266	22172.3
269	14606.6	13093.8	262229	114938	22191.2
270	14622	13020.8	261833	115024	22169.1
271	14661.4	13063.6	262144	115031	22154.7
272	14641.9	13099.4	262216	114980	22180.1
273	14577.9	13124.7	262687	115059	22207.6
274	14589.1	13057.7	262387	115032	22215.4
275	14576.3	13160.8	262469	115060	22188.9
276	14535	13081.4	262593	115088	22146.6
277	14616.1	13123.3	263119	114825	22249.9
278	14580.7	13126.7	263141	114832	22264.9
279	14618.1	13124.6	263514	114818	22112.9
280	14640.4	13108.5	263516	114987	22120
281	14542.4	13055.5	263873	114804	22236.2
282	14636.6	13153.9	263798	114693	22200.2
283	14564	13047.9	263664	114674	22293.4
284	14614.2	13080.9	264004	114613	22308.1
285	14542.6	13095.7	264075	114678	22312.2
286	14590.8	13137.1	264535	114627	22207.7
287	14543.7	13096	264275	114690	22270.7
288	14666.4	13054.3	264388	114676	22257.2
289	14581.2	13143.7	264656	114743	22328.1
290	14573.4	13093.4	264831	114366	22211.5
291	14581	13103.1	264798	114748	22287.2
292	14634.6	13045.6	265060	114516	22339.3
293	14628.7	13086.5	265219	114613	22379.8
294	14725.9	13016	265462	114643	22351
295	14621.8	13077.4	265897	114492	22331.2
296	14629.4	13115.2	265503	114530	22317.1
297	14581.9	13054.2	265811	114369	22373.5
298	14648.4	13065.3	265926	114324	22415.6
299	14535.7	13084.8	266346	114418	22322.8
300	14567.2	13148.9	266172	114304	22406.9
301	14616.7	13056.8	266287	114305	22313.2
302	14515.7	13137.4	266626	114274	22364.6
303	14581.2	13108.8	266429	114288	22492
304	14586.7	13089.1	266426	114113	22403.2
305	14546	13163.5	266654	114008	22458.4
306	14600.3	13114	267024	114236	22498.6
307	14522.3	13108.7	266810	114117	22471.4
308	14566	13056.9	267215	114168	22491.3
309	14573.8	13087.5	267063	114043	22450.8
310	14553.2	13015.8	267128	114334	22430.4
311	14561	13197.4	267221	113975	22407.8
312	14659.5	13117.6	267592	114090	22498.3
313	14580.2	13032	267790	113936	22413.9
314	14534.1	13000.3	267714	113939	22527.3
315	14595.8	13074.6	267970	113984	22442.9
316	14570.7	13116.7	267691	114000	22500.9
317	14562.2	13109.3	267880	114126	22506.6
318	14574.6	13135.7	267982	113992	22478.6
319	14547.4	13106.8	268423	114077	22501.1
320	14612.4	13095.9	268036	114067	22582.7
321	14571	13137.9	268424	113769	22495.2
322	14562	13011.7	268382	113865	22440.9
323	14552.9	13083.9	268416	113683	22499.5
324	14538.8	13131.5	268813	113910	22492.1
325	14609.7	13039.9	268655	113648	22506.4
326	14550.1	13054.5	268771	113686	22444.7
327	14681.3	13090.8	268625	113796	22484
328	14648.5	13089.7	269189	113634	22530.2
329	14536.9	13192.9	269116	113868	22567.2
330	14545.1	13080.7	269295	113659	22569
331	14563.8	13034.6	269322	113557	22607.6
332	14596.8	13060	269668	113548	22581
333	14589.3	13075.9	269037	113430	22523.1
334	14649.9	13078.1	269590	113577	22604.9
335	14512.9	12979.3	269852	113587	22592.2
336	14557.8	13104.3	269612	113411	22641.3
337	14522.3	13049.6	269678	113470	22663.6
338	14534.7	13071.7	269779	113669	22634.9
339	14594.4	13028.5	269899	113668	22526.3
340	14551.4	13044.9	269877	113706	22489.6
341	14505.3	13092.8	270356	113556	22583.8
342	14510.8	13018.9	270134	113488	22578.8
343	14535.9	13039	269972	113404	22611
344	14573.9	13081.4	270494	113564	22653.2
345	14509.9	13046.5	270348	113258	22697.2
346	14563.1	13139.4	270555	113234	22669.8
347	14580.9	13054.3	270715	113498	22647.4
348	14540.5	13064.6	270552	113358	22717.5
349	14554	13166.1	270748	113548	22566.2
350	14555.8	13088.7	270496	113263	22691.9
351	14523.4	13079.6	271199	113363	22798.6
352	14522.8	13024.6	270785	113067	22711.8
353	14581.3	13070.5	271097	113102	22695.7
354	14503	13025.4	271308	113235	22644.4
355	14535.6	13061.4	271390	113406	22764.2
356	14576.1	13048.3	271263	113201	22698.9
357	14558.6	13084.7	271157	113218	22663
358	14594	13131.7	271037	113315	22768.5
359	14486	13100.3	271489	113058	22798.2
360	14555.2	12978.8	271337	113080	22685.5
361	14529.4	13029	271339	113136	22757.4
362	14560	13090.3	271563	113036	22706.5
363	14573.2	13054	271692	112934	22832.1
364	14509	13080.8	271392	112857	22696.2
365	14481.8	13136.6	271766	113097	22824.5
366	14549.4	13085.1	271625	112854	22802.1
367	14595.6	13057.6	271965	112929	22774.1
368	14640.7	13021.8	271873	112922	22781.6
369	14514.3	13089.1	271890	112901	22818.9
370	14586.1	13049.8	271821	112694	22755.3
371	14527.9	13032.8	272186	112793	22864.1
372	14571	13130.4	272080	112815	22843
373	14552.6	13102.4	272079	112808	22816.7
374	14516.9	13040.3	272310	112686	22873.3
375	14575.8	13134.7	272130	112897	22852.5
376	14579	13052.1	272305	112932	22768.6
377	14549.3	13124.1	272285	112691	22788.9
378	14617.7	13037.5	272261	112897	22806.2
379	14620.3	13049.8	272356	112696	22871.7
380	14481.2	13108.9	272607	112800	22689.9
381	14490.2	13069.7	272694	112818	22853.6
382	14609.6	13054.8	272769	112811	22817.2
383	14613.8	13085	272692	112731	22882.2
384	14595.3	13017.5	272744	112770	22817.7
385	14562.1	13013.9	272694	112578	22836.7
386	14639.8	13123.2	272888	112428	22827.1
387	14461.6	13126	272632	112556	22881.1
388	14500.1	13097.8	272916	112346	22892.4
389	14537.2	13023.9	273245	112541	22951.9
390	14561	13029	272753	112675	22775.5
391	14569	13076.9	273144	112530	22919.1
392	14508.9	13052.4	273181	112593	22891.7
393	14529	13079.7	273227	112204	22972.3
394	14547.6	13040.5	273451	112337	22919.5
395	14546.8	13057.8	273017	112535	22970.7
396	14527.3	13051.9	273431	112489	22839.1
397	14442.5	13075.9	273216	112136	22919
398	14503.1	13066.7	273507	112360	22976.3
399	14570.7	13040.3	273204	112119	22936.8
400	14520.4	13049.7	273234	112387	22987.4
401	14515.1	13081.5	273368	112333	23008
402	14549.1	13038.5	273291	112131	22994.9
403	14466.7	13086.5	273712	112313	22969.7
404	14573.9	13094.2	273396	112121	23004.6
405	14514.2	13039.8	273770	111925	23023.8
406	14574.7	13093.6	273485	112412	23024.5
407	14532.4	13052.3	274019	112214	23007
408	14529.4	13051.1	273421	112160	23087
409	14578.4	13078.2	273379	112318	22994.9
410	14558.3	13019.2	273453	111925	22946.6
411	14612.9	13110.8	273847	111971	23019.6
412	14559.6	13085.6	273838	111981	23026.8
413	14624.4	13038.4	273722	112090	23029.1
414	14496.8	13061.3	273669	112052	22901.2
415	14530.3	13051.3	273989	112114	22992
416	14537.2	13036.8	273982	111943	23006.6
417	14535.7	13049.7	273758	112005	22995.5
418	14524.1	13070.5	273761	111908	22978.5
419	14522.4	13020	273786	111887	23027.6
420	14542.9	13070	273860	111748	23077.4
421	14555.1	13129.9	274229	111815	23067.5
422	14535.2	13064.6	273700	111952	23058.7
423	14525.1	13051.5	273830	111762	23069.8
424	14539	13057.4	274209	111932	23052.6
425	14528.4	13065.6	273935	111856	23019.4
426	14519.3	13020.1	273957	112016	23057.2
427	14561	13014.4	273967	111929	23057
428	14496.8	13071.5	274078	111592	23070
429	14558.3	13055.1	274346	111934	22979.6
430	14510.3	13081.4	274540	111827	23148.1
431	14607.9	13054.8	274458	111759	23075.8
432	14610.8	13050.7	274312	111631	23112.9
433	14485.6	13104.8	274411	111926	23087.4
434	14529	12969.3	274270	111751	23123.8
435	14463.7	13059.7	274364	111722	23060.3
436	14575.2	13038.7	274358	111612	23116
437	14572.5	13053.2	274256	111577	23108.9
438	14628.9	13035.3	274374	111363	23113.3
439	14556.8	13055.6	274081	111530	23017.7
440	14497.5	13083.6	274400	111388	23107.5
441	14486	13039.3	274025	111506	23111.8
442	14520.5	13085.1	274169	111463	23073.1
443	14468.5	13071.1	274550	111663	23125
444	14594.5	13108.9	274332	111660	23073
445	14499	13074.4	274149	111568	23111.9
446	14498	13069.9	274553	111389	23202.5
447	14512.1	13025.8	274689	111350	23060.9
448	14564.8	13058.3	274541	111439	23015.3
449	14427.3	13043.1	274106	111393	23098.3
450	14495.2	13141.8	274354	111382	23062.6
451	14450	13080.1	274604	111460	23232.9
452	14511.8	13085.3	274392	111407	23190.7
453	14501.9	12968.6	274811	111341	23177.8
454	14542.8	13079.6	274596	111352	23141.6
455	14596.2	13102.7	274342	111315	23155.7
456	14484.7	13013.4	274875	111551	23201.3
457	14459.4	13133.7	274868	111306	23052.9
458	14506.4	13050.9	274730	111235	23086.1
459	14519.8	13046.9	274813	111266	23083.2
460	14513.9	13009.2	274769	111257	23247.5
461	14540.6	13076.8	274843	111124	23053.4
462	14500.9	13093.9	274924	111486	23172
463	14538	13048.4	274617	111265	23157.1
464	14482.6	13056.3	274691	111062	23106.9
465	14509.8	13014.7	274850	111131	23268.3
466	14492.9	13074	274831	111169	23183.2
467	14476.2	13036.5	275103	111226	23223.2
468	14495.3	13034.6	274867	110980	23198.9
469	14456.3	13086.7	274928	111316	23209.9
470	14559.2	13081.4	274907	110840	23143.5
471	14459.1	13067.6	274962	111079	23182.4
472	14522.8	12994	274998	110793	23201.3
473	14526.1	13033.3	274840	111086	23175.7
474	14481.5	13107.5	274874	111126	23278.7
475	14547.2	13035.8	274754	111006	23206.9
476	14555.3	13093.2	274977	111070	23206.4
477	14500.6	13062.9	274778	110890	23176.4
478	14560.4	13145.8	274908	110800	23243.5
479	14459.5	13012.2	274693	111107	23174.5
480	14530.9	13027.2	274802	110896	23289.7
481	14540	13076.9	274771	110614	23170.2
482	14525.9	13030.3	275186	111076	23216.3
483	14501.2	12988.2	274840	110790	23238.3
484	14508.3	13046.3	275053	110797	23228.2
485	14490.5	13025.9	274863	110910	23129.8
486	14503	13072.2	275056	110876	23253
487	14493.2	13065.9	275190	110889	23294.4
488	14499.9	13083.1	274991	110756	23309
489	14563.1	13064.2	274927	110630	23364.1
490	14528.9	13084.6	275045	110514	23218.5
491	14518.5	13014.1	275112	110617	23295.2
492	14562.2	13082.8	275104	110684	23228.9
493	14449.5	13034.3	274743	110518	23272.9
494	14444.8	13004.1	275017	110714	23267.6
495	14507.7	13018.8	274750	110735	23251.9
496	14548	13040.4	275019	110651	23348.3
497	14576.5	13040.2	274963	110511	23309.1
498	14466.6	12991.9	275057	110560	23333.6
499	14449.7	13018.2	274919	110540	23327.6
500	14578.2	13100.2	274767	110336	23318.1
501	14500.9	13055.8	275072	110569	23258.1
502	14517.3	13089.6	275125	110542	23234.6
503	14500.4	12938.5	275079	110344	23343.5
504	14516.7	12980.9	274800	110436	23299.3
505	14454.9	12988.9	274708	110422	23289.8
506	14454.7	13011.1	274753	110492	23383.4
507	14595.6	13032.9	275244	110428	23348.1
508	14466.5	13074.8	274815	110460	23391.5
509	14433.7	13052.1	275125	110433	23326
510	14466.8	12989.1	275505	110362	23393.4
511	14464.7	13013.9	274913	110378	23367.9
512	14476.7	13023.8	275268	110336	23303.6
513	14534.2	13029.2	274708	110395	23377.5
514	14551.6	13055.6	275088	110432	23312.5
515	14494.6	13068.8	275146	110130	23310.6
516	14495.3	13028.6	274974	110060	23359.1
517	14590.9	13043.6	275419	110282	23362.6
518	14518.7	13035.4	275510	110246	23301.3
519	14477.2	13022.6	274975	110189	23308
520	14473.4	13017.8	275063	110370	23437.7
521	14520.7	13116.7	275098	109919	23309.4
522	14460	12991.5	274693	110249	23338.3
523	14430.5	13090.6	275347	110146	23376.1
524	14504.1	13052.2	275288	110101	23286.8
525	14454.2	13002.3	275164	110202	23385.3
526	14472.6	13118.9	275265	109738	23332
527	14484.3	13095.6	275225	109981	23326.1
528	14525.9	13077.6	275132	109960	23374
529	14452.4	13004.9	275317	109958	23364.2
530	14462.4	13085	275150	110067	23394.8
531	14483	13009.3	275288	109960	23268
532	14492.1	12991.2	274781	110159	23335.4
533	14383.1	13042.6	274855	110069	23357.5
534	14462.4	13090.6	275078	109752	23308.6
535	14444.9	13076.4	274902	110353	23422.7
536	14412.8	12998.1	274928	109781	23422.4
537	14485.3	13045.7	275468	110096	23368.7
538	14449.6	13061.2	275134	109934	23445.8
539	14495.2	13058.3	275125	109742	23444.5
540	14540.2	13030.5	274974	109742	23520
541	14489.5	12972.9	274938	109864	23412.3
542	14465.8	13021.8	275312	109662	23471.2
543	14449	13029.4	275047	109665	23502.2
544	14531.4	13132.8	275376	109825	23319.8
545	14445.6	13055.8	275540	109854	23425.2
546	14402	13082.5	275143	109824	23390
547	14519.4	12991	275345	109795	23381.9
548	14428	13019.6	274879	109835	23489.9
549	14530.1	13034.7	275317	109763	23328.8
550	14457.4	13015.4	275149	109916	23347.1
551	14497.8	13022.4	275258	109827	23408.5
552	14515.2	13025.8	274811	109717	23502.1
553	14480	12984.4	274942	109531	23448.3
554	14470.9	13040.3	275199	109516	23465.5
555	14451	13083.8	275443	109550	23506.1
556	14503.7	13075.9	274912	109595	23337.3
557	14381.1	13015.1	275008	109559	23419.3
558	14430.8	13058.1	274871	109357	23443.7
559	14437.6	12984.1	275026	109642	23397.8
560	14423.3	12958.8	275180	109651	23353.5
561	14450.6	13097.6	275057	109674	23466.5
562	14500.6	13044.5	275112	109397	23419.2
563	14470.5	12977.3	274761	109553	23408.5
564	14466.9	13010.7	275494	109428	23474
565	14397.5	13014.8	275277	109402	23474.1
566	14478.6	13032.3	275028	109507	23468.6
567	14501.9	13062.5	275031	109537	23428
568	14531.3	13015.1	275106	109559	23452.4
569	14438.5	13078.3	275270	109291	23463.9
570	14432.4	13058.1	274714	109632	23460.6
571	14465.7	12992.3	275151	109395	23497.9
572	14456.7	12953	275261	109460	23515.7
573	14497.6	12992.3	274967	109463	23514.5
574	14522.4	13077.7	275195	109445	23555.3
575	14429.8	13071.4	274975	109249	23406.6
576	14504.2	13032	275130	109421	23465.1
577	14471	13009.4	275260	109184	23428.6
578	14537.1	13072	274888	109240	23439.4
579	14385.5	12995	274783	109453	23515.5
580	14448.4	13003.4	274896	109181	23479.8
581	14416.8	13037.9	275240	109185	23490.9
582	14483.4	12952.1	274761	109115	23529.7
583	14535.9	13086.8	274887	109114	23464.4
584	14391.1	13028.1	275067	109191	23545.2
585	14429.3	13061.3	275150	109395	23424.1
586	14368.1	13097.3	274892	109105	23419.4
587	14400.3	13035.3	274665	108980	23541.5
588	14445.8	13057.8	275022	109098	23539.5
589	14493.5	13102.7	275191	109083	23579.6
590	14405.7	12954.4	275046	109051	23556.8
591	14407.9	12989.3	275307	109095	23600.9
592	14445.8	13035.8	274658	109087	23469.7
593	14531.8	12995.6	274554	109234	23511.7
594	14446.6	12958.1	274746	108974	23515.8
595	14398.6	13022.6	274857	109120	23561.9
596	14506.2	13044.3	274811	109009	23529.3
597	14466.6	13083.6	274967	109098	23478.3
598	14507.7	13061.5	275112	108994	23562.3
599	14459.5	13027	274900	108978	23474.8
600	14360.6	13070.9	274940	109061	23620.1
601	14490.2	13058	193940	15534.9	13662
602	14403.1	13013.9	192826	15502.1	13740.2
603	14513.5	13034.4	191744	15359	13765.9
604	14424.9	13050.3	191195	15502.3	13684.2
605	14496.1	12998.2	190237	15369.5	13610.1
606	14425.7	13076.6	189379	15466.9	13621.4
607	14480.5	13015.8	188610	15355.3	13595.6
608	14462.2	13021.1	187606	15442.1	13600.4
609	14447.7	13055.7	187124	15326.2	13629.5
610	14487.5	13089.5	185737	15283.1	13580
611	14458.7	13092.7	185290	15269.1	13559.9
612	14564.9	13024.2	184585	15278.1	13565
613	14406	13041.7	183639	15315.4	13455
614	14461.9	13023	182709	15245.2	13484.1
615	14485.5	12987.2	182265	15278	13566.7
616	14329.9	13053.9	181540	15372.5	13528.2
617	14486.6	13023.1	180691	15264.8	13500
618	14432.9	12994.9	179977	15158.1	13439.1
619	14465.8	12962.5	179202	15215	13508.6
620	14448.3	12963.9	178767	15257.5	13467.1
621	14455.4	13057.9	177888	15203	13460.3
622	14436	13038.6	177219	15225.7	13484.5
623	14459.9	12944.6	176634	15187.5	13487
624	14487.5	13052.3	175949	15178.2	13509.2
625	14515.8	13052.4	174923	15156.4	13393.7
626	14448.4	13004.4	174215	15235.5	13552.2
627	14439.2	13064.8	173734	15180.1	13511.2
628	14425.1	13028.1	173079	15142.7	13428.7
629	14438.6	12960.5	172827	15092	13454.3
630	14406.9	13050.2	171844	15121.8	13532.7
631	14446.1	13058.5	171208	15091.4	13485.4
632	14440.3	13057.7	170615	15113.9	13443.4
633	14489.3	13038	169880	15096.2	13364.5
634	14456.5	12995.7	169157	15079.4	13421.6
635	14392.6	13091.9	168806	15205.2	13413.2
636	14526	12996.7	168044	15054.4	13387.6
637	14474.4	13034.7	167434	15138.8	13445.3
638	14490.2	12984.6	166993	15057.4	13414.5
639	14411.4	12910.8	166408	15062.4	13410.2
640	14470.3	13055.1	165710	15107.5	13418.6
641	14445.9	13150.5	164875	15096.2	13484.5
642	14449.7	13048	164518	15134.1	13312.8
643	14387.5	13031	163624	14999.9	13407.8
644	14399.1	13042.5	163368	15091.2	13375.3
645	14393.5	13024.3	162874	15065.5	13412.5
646	14459.3	13048.5	161870	15082.3	13365.8
647	14373.1	13093.3	161592	14992.1	13332
648	14452.3	13050.3	161068	14952.3	13363.9
649	14363.7	12980.8	160508	15028.3	13353.2
650	14477.1	13029.7	160065	14974.2	13402.3
651	14377.8	12989.1	159570	14989.8	13375.9
652	14453.8	13032	158769	15014.5	13413.8
653	14467.2	13016.7	158165	15110.9	13301.6
654	14472.9	13040.6	157904	14952.9	13376.6
655	14435.6	12976	157152	15006	13373.9
656	14394.6	13062.1	156744	14994	13297.1
657	14411.1	12983.5	156420	15030.5	13403.9
658	14471	13031.1	155783	14979.3	13333.7
659	14504.4	13085.1	155181	14914.1	13253.1
660	14452.3	13001.1	154772	14965.2	13327.1
661	14477.9	13058.3	154463	14926.1	13258.6
662	14384.8	12936.7	153652	14990.7	13271.2
663	14474.9	13014	153133	14893.3	13328.8
664	14440	13031.3	152627	14981.4	13307.7
665	14458.3	12969.8	152085	14939.4	13283.6
666	14443.4	13027.5	151675	15036.2	13262.6
667	14482.2	13066.1	151363	14969.8	13275.4
668	14479.9	13018.7	150674	14964.1	13362.7
669	14477.2	13008.5	150178	14932.9	13269
670	14481.6	13011.5	149815	14888	13209.2
671	14390.1	13041.7	149169	14957.6	13238.2
672	14467.2	12994.6	148809	14891.7	13189.8
673	14455.5	13069	148326	14914.5	13255.8
674	14398	13075.8	147891	14939.4	13282.5
675	14336	13013.1	147467	14907.5	13246.5
676	14422.9	13047.8	146831	14945	13214.5
677	14402.5	12963.6	146499	14902.1	13203.5
678	14389.4	13066.1	146078	14949.8	13207.7
679	14436.7	12990.8	145846	14903.1	13162.1
680	14400.3	12999.8	145174	14931.6	13301.3
681	14501.4	13016.7	144785	14819.3	13273.7
682	14411	13026.8	144395	14851.3	13270.9
683	14454.9	13048	143972	14865.6	13169.1
684	14499.5	13031.8	143435	14863.6	13170.2
685	14470.6	12938.2	143059	14902.7	13155.8
686	14452.6	12970.7	142374	14937.4	13196.9
687	14472.6	12978.2	141804	14856.3	13234.6
688	14408	13033.8	141508	14831.7	13208
689	14361.9	13107.4	141233	14757.5	13246
690	14413.7	12987.9	140854	14864.9	13200.3
691	14388	13017.4	140523	14914.5	13182.8
692	14459.5	13011.6	140014	14766.4	13164.1
693	14458.8	13070	139511	14854.1	13139.8
694	14455.8	13049.9	139308	14868.8	13218.1
695	14351.5	12991.4	138722	14803.5	13207.8
696	14394.9	12986.8	138554	14870.3	13182.3
697	14442.6	13037.9	138021	14876.7	13133.2
698	14472.5	13018.8	137394	14901.7	13132.4
699	14371	12998.5	137311	14769.9	13113.7
700	14457.3	13052.2	136921	14884.7	13191.5
701	14377.2	13002.3	136644	14805.6	13180.9
702	14459.6	12962.5	136202	14900.4	13127.7
703	14391.4	13069.6	135884	14890.7	13186.3
704	14445	13016.7	135478	14843.6	13151.2
705	14432.3	13025	134955	14834.3	13135.5
706	14400.7	12983.7	134537	14798.4	13155.9
707	14518.6	13040.2	134310	14801	13181
708	14397.8	13036.9	133856	14818.2	13109.8
709	14392.7	13035	133358	14862.3	13113.4
710	14402.9	13009.7	133254	14837.9	13183.1
711	14415.6	13053.4	132799	14852	13103.1
712	14412.3	13093.3	132270	14794.9	12995
713	14487.3	13066.7	132023	14846.3	13117.2
714	14488.2	13015.7	131953	14750.5	13142.3
715	14405.7	12920.9	131345	14894.5	13137.8
716	14428.7	13038.5	131096	14836.9	13182
717	14415.7	12988.5	130795	14768.1	13088.5
718	14430.5	13004.3	130267	14806.3	13109.3
719	14416.9	13027.7	130226	14787.4	13123.7
720	14444.5	13054.8	129638	14850.6	13125.1
721	14459.8	13001.9	129345	14723.8	13085.7
722	14402.2	12925.3	129189	14815.7	13176.2
723	14411.3	13018.2	128715	14753.5	13157.1
724	14442.3	13082.2	128319	14746.3	13147.4
725	14461	13067.1	127993	14681.5	13101.4
726	14382.7	13054.1	127734	14786	13113.2
727	14391.9	13020.1	127293	14788.6	13140.4
728	14434.5	13038.5	126977	14786.6	13008
729	14426.7	13054.3	126779	14843.2	13100.5
730	14431.1	13017.2	126252	14811.1	13038.5
731	14469.5	13044.2	126190	14807.9	13078.7
732	14441.1	13041.4	125653	14748.2	13153.9
733	14440.1	13114.2	125516	14813.7	13105.2
734	14484.1	13055	125262	14826.9	13067.1
735	14398.5	12990.1	124847	14759	13080.9
736	14377.6	13029.8	124740	14690.8	13098
737	14419.6	13008.3	124273	14795.5	13031.9
738	14508.6	13014.7	123986	14752	13098.5
739	14370.1	13002.7	123686	14742.9	13115.9
740	14394.7	12995.3	123654	14779.2	13047.9
741	14470.6	12978.7	123213	14781.6	13052.2
742	14362.7	12976.7	122781	14741.6	13047.4
743	14428.7	13030.6	122775	14739.9	13121.3
744	14385.1	13055	122193	14701.6	13052.7
745	14438.1	13117.5	122006	14721	13075.2
746	14426.1	13025.9	121762	14721.5	13114.7
747	14466.3	13066.5	121356	14775.8	13092.4
748	14460.1	13016.9	121265	14755.5	13107.2
749	14450.5	12989.9	120931	14689.6	13011.6
750	14335.2	12996.3	120623	14759.3	13072.8
751	14380.6	13003.2	120351	14792.4	13005.6
752	14376.7	13000.4	119990	14655.8	13086.6
753	14429.1	13016.8	119653	14740.5	13059.9
754	14439.2	13031.3	119379	14694.5	13013.7
755	14436.6	12976.2	119114	14654.8	13044.8
756	14454.3	13016.4	118907	14742.3	13010.8
757	14444	13029.3	118520	14726	13004.9
758	14382.4	12928	118626	14780.4	13061.6
759	14409.8	13002.7	118169	14744.4	13026.9
760	14263	13022.9	117825	14773.7	13043.9
761	14466.1	13043.6	117819	14800.9	13024.3
762	14439.4	12946.3	117263	14787.4	13045.9
763	14406.8	12990.2	117405	14690.4	13057.1
764	14392.7	12994.5	116804	14670	12982.3
765	14409.9	13033.6	116681	14673.2	13024.3
766	14385.3	12978.1	116281	14711.4	13049.2
767	14398.1	12941.2	116368	14672.7	13081.3
768	14382.7	12946.3	115743	14664.2	13027.3
769	14481	12947.6	115736	14694	13043.7
770	14447.5	13086.5	115438	14762.5	13068.5
771	14354	12995	115144	14638.7	13011.7
772	14431.4	13028.5	115020	14693.1	12977.2
773	14487.1	12982.2	114684	14654.1	13065.9
774	14424.8	12978	114231	14684.5	13015.6
775	14388.3	12978.3	114148	14727.9	12985.9
776	14424.9	13082.1	113902	14747.4	12998.1
777	14407	13080.4	113907	14655.8	12988.4
778	14438.3	12993.8	113528	14732.8	13074.3
779	14349.2	13023.4	113391	14755	12967.2
780	14361.1	13070.9	113077	14718.4	13076.1
781	14350	12959.6	112776	14707.8	12986.1
782	14431.9	12962.3	112676	14679.4	12984
783	14463.3	12969.1	112358	14725.7	12936.5
784	14426.5	12983.6	112026	14663.7	13036.4
785	14364.3	13045.7	111894	14686.9	12983.6
786	14387.9	13011.5	111659	14688.8	13007.3
787	14410	13080.6	111621	14640.5	13057.9
788	14423.2	13065.8	111265	14659.6	13036.6
789	14378.9	13025.9	111054	14603.7	12972.5
790	14507.1	13060	110800	14662.1	13019.3
791	14387.2	13010.8	110600	14736.6	13050.1
792	14420.2	13002.2	110471	14620.6	12948.4
793	14331.9	12980.6	110500	14743.3	12961.4
794	14332.8	12989.6	110145	14707.6	13052.4
795	14484	12958.4	109874	14663.1	12916.3
796	14345.8	12975	109479	14697.3	12926.1
797	14368.5	13048.7	109366	14608.8	13017.3
798	14474.9	13027.9	109148	14694.1	12965.6
799	14349.6	13114	109061	14719.7	12976.5
800	14402.3	13049.5	108798	14659.8	12961.1
801	14428.6	13013.5	108739	14621.7	12907.4
802	14421.4	12958.7	108514	14600.4	12971.7
803	14440.4	13050.4	108279	14591.6	13015.5
804	14449.5	13030.9	107907	14655.8	12963.8
805	14444.4	12991.3	107850	14760.6	12993.4
806	14431	12982.5	107661	14597	12946
807	14516.7	13014	107413	14617.1	12985.5
808	14408.1	12976.8	107135	14647.8	12943.6
809	14478.7	12987.4	107123	14693.7	12990.6
810	14438.7	13001.5	106849	14681.1	12910.6
811	14458.6	12965.1	106383	14686.1	12998
812	14446.4	12929.4	106490	14632.3	12934.7
813	14469	12917.5	106381	14655.8	12938.5
814	14359.6	12946.6	105957	14657.9	12980.9
815	14485.4	12984.5	105905	14590.3	12869.5
816	14442.6	13013.5	105796	14603.9	12937.7
817	14351.1	13060.5	105618	14647.6	12860.8
818	14407.5	12998.5	105353	14647.1	12979.1
819	14394.2	12993.2	105347	14666.8	12992
820	14365.3	13094.1	104861	14687.2	12928.9
821	14476.4	13075.7	104639	14643.6	12940.3
822	14357.8	13022.3	104588	14644	13014
823	14367.9	13066.2	104232	14673.5	12926
824	14479.4	13007.9	104317	14628.9	12907.3
825	14431.7	12985.3	104026	14637	12905.8
826	14403.2	12964.4	103952	14634.8	12941.8
827	14392.4	13043.1	103837	14624.1	12936.5
828	14480.6	13051.1	103724	14683.3	12950.9
829	14402.3	13016	103349	14673.6	12952.3
830	14420.3	12970.5	103167	14667	12915.6
831	14375.9	12974.1	103139	14672.3	13000.9
832	14388.7	12995.2	102870	14616.2	12947.4
833	14416	12982.8	102584	14637	12949.8
834	14429.7	12952.5	102607	14618.4	12950
835	14390.4	13055	102076	14582.6	12950.3
836	14365.3	13061.7	102173	14612.3	12878.8
837	14376.6	13054	101890	14606.9	12967.7
838	14421.1	13014.6	102087	14652	12961
839	14406.8	13015.6	101835	14589.9	12943.3
840	14419	12974.3	101351	14636.2	12910.7
841	14369.5	13073.5	101325	14643	12893.3
842	14427.4	13003.4	101013	14606.9	12946.1
843	14373.6	12945.2	101088	14635.5	13010.5
844	14317	13017.9	100864	14604.7	12915.2
845	14428.2	13038.3	100782	14589.5	12867.9
846	14389.3	12988.7	100568	14629.9	12916.2
847	14484.5	12998.1	100513	14631.2	12901.5
848	14412.3	13026.4	100259	14602	12910.2
849	14387	12971.9	100091	14709.9	12926.7
850	14430.6	13042.9	99984.6	14681.7	12950.2
851	14374.7	12959.9	99839.1	14649.8	12891
852	14371.7	13027.3	99644.3	14560.3	12951.9
853	14345.5	13013.2	99411.5	14634.9	12915.8
854	14385	13004.4	99217.6	14498.7	12896
855	14360.5	12993.2	99183.9	14631.7	12978.7
856	14397.5	12965.4	98804.6	14544.8	12931.5
857	14424.2	13037.6	98678	14643	12962.9
858	14481.2	13019.1	98543.3	14622.4	12961.2
859	14398.1	12915.6	98604.5	14607.2	12930.2
860	14474	13033.9	98372.7	14597.1	12915.1
861	14369	13013.5	98416.8	14626.4	12888.6
862	14485.8	12941.4	98111	14599.9	12953.6
863	14322.8	13044.4	98105.6	14682.4	12944.7
864	14522.2	13027.5	97773.1	14594.3	12984.7
865	14358.6	13018	97761.2	14565.1	12908.6
866	14390.3	13059	97573.9	14658	12927.7
867	14354.4	13059.9	97513.9	14632	12910.4
868	14473.5	13035.3	97097.9	14601.9	12940.3
869	14375.4	13078	97007.7	14528.8	12984.3
870	14426.6	13003.3	96963.9	14611	12970.9
871	14414.2	13026.8	96779	14652.8	13008.8
872	14438.3	12973.4	96635.7	14608.6	12984.9
873	14465.4	13016.9	96385.5	14570.7	12862.8
874	14400.5	12984.5	96277.9	14542.1	12892.3
875	14373.9	13013.9	96375.1	14557.1	12920.9
876	14417.1	13039.9	96285.2	14569.4	12983.5
877	14440.9	13014.6	96015.6	14630.3	12922.4
878	14386.6	13005.7	95936.4	14589.7	13014.7
879	14433.1	12970.9	95937.2	14483	12888.7
880	14361.6	12991.9	95674.7	14607.9	12919.1
881	14368	12958.1	95431.2	14678.4	12799.6
882	14399.6	13011.9	95312.2	14646.5	12959.5
883	14398.2	12910.5	95299.4	14603.8	12924.6
884	14435	13017.5	95108.5	14553.6	12897.5
885	14408.7	13042.3	95089.6	14523.2	12952.9
886	14386.8	12980.4	94675.2	14602.8	12939.1
887	14425.6	13025.4	94660.7	14619.3	12997.7
888	14376.4	12995.3	94539.3	14559.8	12953.6
889	14369.5	13051.9	94458.6	14495.6	12860.5
890	14400.7	12972.3	94157.3	14585.6	12918.3
891	14376.8	12976	93990.4	14513.1	12932.2
892	14365.9	13028.4	94149.3	14547.6	12929.5
893	14368.1	12967.7	94014.7	14566.7	12922.8
894	14373.7	13023.1	93934.7	14569.6	12904.3
895	14333.5	13016.6	93641.7	14489.9	12881.2
896	14404.7	13075.3	93373.5	14537.1	12931
897	14413.4	13002.3	93461.9	14572.8	12898.5
898	14426.3	13026.6	93188.7	14600	12934.4
899	14422.2	13000	93246.7	14540.9	12948.3
900	14434.4	12904	92900.8	14588.8	12929.8
901	14382.5	13073.2	92907.9	14568.9	12844.4
902	14372.7	13010.6	92647.7	14580.1	12881.6
903	14388	12963.7	92502.2	14523.6	12991
904	14408.1	13005	92498.1	14592.1	12846.1
905	14365.8	12991.8	92349.8	14484.3	12937
906	14396.1	13006.9	92398.7	14549.2	12893.8
907	14407.8	12933.6	92187.6	14505.2	12871.5
908	14384.3	13040.4	92263.6	14597.2	12868.7
909	14378.5	12989.6	91974.8	14587.4	12931.8
910	14389.9	13019.5	91884.7	14581.3	12855.8
911	14392.1	13008.7	91690.3	14553.4	12934.6
912	14411.6	12976.3	91644.3	14536.6	12895.4
913	14384.8	12953.2	91288.8	14597.5	12970.6
914	14408.8	13006.2	91391.6	14576.7	12837.9
915	14407.8	13043.3	91382.9	14587.4	12834.4
916	14419.2	12972.1	91041.5	14572.1	12940.6
917	14421.2	12988	91301.2	14597.1	12862.4
918	14393.7	13054.6	91101.6	14560.5	12890
919	14341.3	12960.3	91249.1	14589.4	12906.7
920	14352.6	13035.6	90838.2	14565.6	12863.8
921	14447.1	13047.1	90653	14571.6	12941.1
922	14368.7	13027.6	90523.1	14613.2	12903.3
923	14364.5	12954.4	90352.8	14543.8	12859.5
924	14396.8	12971	90334.2	14485.3	12901.3
925	14414.9	12969.6	90128.9	14563.7	12891.9
926	14374.7	12986.8	90022.3	14522.4	12839
927	14460	12997.9	89951.4	14526.9	12833.4
928	14367.5	12974.4	89843.1	14517.7	12857.7
929	14394	12939.4	89791.5	14570	12960.5
930	14396.1	12983	89570.6	14531.4	12880.1
931	14390	13100.3	89536.9	14570.6	12800.6
932	14354.7	13052.3	89585.3	14600.4	12903.3
933	14529.7	13047.7	89449	14519.4	12878.1
934	14385.1	12952.1	89231.9	14624.7	12861.2
935	14475	12952.8	89177	14564.2	12870.9
936	14411	12967	89215.6	14550.8	12878.7
937	14374.7	12954.6	89130.6	14540.3	12894.7
938	14382	12970.8	88964.4	14533.8	12874.2
939	14398.6	12964.3	88723.5	14544.2	12921.5
940	14422.2	12996.3	88444.4	14438	12982.8
941	14436.7	13016.8	88640.3	14529.7	12950.8
942	14394.8	12904.8	88518.8	14479.3	12848.6
943	14350.1	12952.3	88421.6	14452.6	12928.8
944	14395.9	12993.8	88159.7	14449.8	12914
945	14348.2	13015.4	88255	14534.9	12899
946	14333.1	12891	88143.9	14562.2	12903.8
947	14390.3	13036.3	88136.3	14512.1	12915
948	14449	13011.3	87966	14537.3	12913.6
949	14486.6	13028.7	87775.4	14633	12866.9
950	14349	13020.4	87745.3	14567.8	12887.7
951	14429.2	12960.9	88034.6	14593.7	12901.9
952	14390.5	13011.3	87581.6	14548	12967.7
953	14464.8	12996.8	87471.4	14522.8	12911.4
954	14375.8	12917.4	87444.2	14494.4	12890.9
955	14431.9	13036.9	87158.7	14500.1	12870.3
956	14367.2	12964.5	87309.7	14518.6	12851
957	14345.8	13006.8	87253.2	14523	12834.4
958	14330.3	12991.9	87122.7	14526.1	12859.4
959	14422	12888.9	86733.3	14408	12899.1
960	14302.6	13017.5	86778.9	14518.7	12977.4
961	14411.6	12971.6	86790	14506.4	12906.2
962	14368.3	13028.6	86728.1	14501.5	12892.7
963	14448.1	12979.5	86644.2	14526.9	12836
964	14366	13094	86478.3	14580	12875.3
965	14388.6	12951.9	86147.3	14498.2	12914
966	14320.6	12975.5	86252.9	14497.4	12944.2
967	14401.1	13026.2	86312.8	14468.1	12887.3
968	14419.6	13025.4	86180.3	14467.4	12853.4
969	14425.7	13010.4	86196.6	14470	12822.5
970	14367.1	13021.7	85967.4	14600.7	12832.9
971	14321.4	13033.9	86111.5	14493.7	12887.8
972	14457.8	12996.4	85964.4	14584.8	12839.2
973	14383	13022.6	85632	14560.1	12849.2
974	14390.9	13010.2	85770.3	14421.8	12917.4
975	14362.1	12967.4	85597.9	14525	12875.4
976	14409.8	13023.3	85584.9	14411.9	12863.2
977	14338.1	13038.6	85284.5	14508.6	12917.9
978	14371.7	13013.8	85388.8	14454.7	12849.6
979	14325	13035.9	85113.1	14501.5	12866.1
980	14388.5	12980.7	85205	14447	12901.3
981	14405.3	13013.6	84973	14549	12868
982	14411.2	12953.5	85020.5	14526.9	12921
983	14468.4	12953.1	85029.3	14565.4	12914.4
984	14398.7	13021.4	84573.5	14444.7	12924.8
985	14318.8	12960.1	84615.1	14590	12850.3
986	14449.8	12963.4	84705.4	14506.6	12950.5
987	14437.1	13030.7	84625.4	14523.8	12914.2
988	14387.4	12942.3	84678.4	14573.8	12805.8
989	14425.4	13002.5	84322.6	14513.2	12862.1
990	14325.6	13000	84263.1	14494.7	12862
991	14387.3	13019.2	84122.1	14520.6	12850.1
992	14364.9	13014.1	84280	14412.3	12852.9
993	14433.1	12987.4	84129.7	14480.9	12894.1
994	14311.7	12966.5	84054.3	14561.1	12818
995	14333.6	12952.3	83890.7	14494.2	12860.8
996	14443.8	13001.9	83853.9	14490.5	12860.3
997	14427	12963.9	84007.8	14546.5	12911
998	14395.3	12906.6	83785.6	14533.6	12867.9
999	14373	12974.2	83668.6	14418.9	12875.6
1000	14402	12945	83695.8	14420	12823.9
1001	14436.3	13067.1	83524.7	14484.3	12850.3
1002	14398.3	13019.2	83518.5	14550.8	12840.7
1003	14341.7	13038.1	83525	14498.7	12882.6
1004	14410.1	12979.6	83323.6	14509.3	12887.2
1005	14411.3	13009	83391.3	14484.2	12869.3
1006	14395.5	12972.6	83266.9	14520.1	12881.5
1007	14444.3	12953.9	83153.5	14492.9	12923.3
1008	14343.2	13006.7	82827.4	14484.7	12873.8
1009	14475.6	12949.2	82986.7	14470	12943.7
1010	14369	12896.6	83013.3	14494	12853.2
1011	14395.4	12959.7	82792.4	14495.6	12905.3
1012	14387	12978.1	82656.9	14492.5	12915.7
1013	14296.5	13012.2	82684.3	14482.7	12902.6
1014	14289.3	13019.2	82657.1	14448.5	12815.8
1015	14388.1	13072.7	82587.6	14471.7	12845.5
1016	14411.3	12922.3	82435.1	14435.3	12792.2
1017	14357.9	12988.3	82462.6	14469.1	12908.2
1018	14391.1	12920.1	82271.4	14505.9	12903.1
1019	14367.5	13018.4	82220.7	14506.5	12851.5
1020	14389.2	12886.2	82296.4	14492.9	12858.6
1021	14478	13034.8	82247.2	14472.8	12827.7
1022	14478.8	13016.8	81952.5	14494	12862.2
1023	14451.1	12989.2	82036	14467.3	12866
1024	14320.9	13009.7	81935.9	14406.1	12898
1025	14265.8	13091.2	81978.6	14510.2	12933.7
1026	14366.5	13037.5	81928.2	14433.9	12907.2
1027	14438.1	12946.4	81851.8	14390.2	12862.3
1028	14323	13007.2	81761.1	14470.1	12941.5
1029	14416.5	12976.3	81669.9	14514.8	12840.1
1030	14354.3	13035.2	81680.4	14551.2	12913.2
1031	14418.1	12931.4	81509.1	14522.1	12855
1032	14335	12969.4	81586.5	14460.1	12863.8
1033	14320.6	12912.2	81415.5	14483.8	12846.2
1034	14355.7	12988.4	81165.4	14558.2	12847.8
1035	14395.8	12950.3	81109.7	14410.7	12833.4
1036	14382.6	12972.5	81173.6	14386.8	12885.7
1037	14379.5	12963.6	80995.6	14542.6	12872.8
1038	14313.9	12933.2	81171.4	14430.7	12905.8
1039	14367.1	12974.5	80955.6	14454.6	12850
1040	14420.7	12967	80903.7	14415.7	12849.8
1041	14456.1	13008.1	80745.8	14551.3	12779.5
1042	14376.7	13065.5	80997.4	14492.4	12837.6
1043	14366.5	12936.6	80809	14397	12827.6
1044	14366.7	13021.2	80663.2	14514.7	12829.6
1045	14314.4	13001.1	80571.6	14434.7	12811.9
1046	14345.1	13004.8	80424.8	14518.1	12821.3
1047	14334	13003.4	80684.1	14399.4	12867.8
1048	14310.5	12961.3	80491.1	14430.6	12848.8
1049	14429.9	12900.8	80462.5	14430	12921.6
1050	14428.2	12956.7	80344.8	14434.6	12861.6
1051	14352.3	12933.4	80290.5	14458	12862.9
1052	14352.4	12920.2	80262.3	14394	12850.9
1053	14373	12914.6	80195.3	14429.4	12909.9
1054	14408.2	13023.6	80198.9	14380.5	12874.1
1055	14438.2	13009	80163.4	14442.6	12826.9
1056	14379.3	12931.9	80037.8	14454.4	12882.3
1057	14372.3	13030.4	80034.6	14432.8	12830.9
1058	14383.9	12924.9	79902.4	14390.7	12835.3
1059	14395.1	12962	79765.5	14512.6	12825.2
1060	14392.8	12995	79716.3	14462.3	12864.3
1061	14428.6	12929.9	79808	14471.9	12843.8
1062	14318.8	12967	79821.7	14503	12823
1063	14381.4	13023.6	79516.8	14403	12831.9
1064	14381.4	12951	79281.6	14455	12806.5
1065	14367.5	12896	79401.3	14522.9	12881.6
1066	14355.2	12951.7	79324	14469.8	12751.5
1067	14349.3	12921.3	79342.5	14491.4	12790.5
1068	14357.7	12922.4	79239.2	14495	12813.9
1069	14392.6	13035	79158	14430.3	12869.9
1070	14434.3	12922.7	79273.9	14458.7	12861.5
1071	14376.9	13005.8	79406.6	14496	12820.9
1072	14455.4	12973	79154.8	14473.7	12843.2
1073	14441.7	12992.1	78990.3	14402	12840.1
1074	14385.3	12967.4	79034.1	14543.9	12856.5
1075	14448.9	12964	78932.9	14407.5	12883.4
1076	14394.6	12954.2	78955.7	14466.6	12924.9
1077	14404.5	12960	79019.6	14445.7	12826.4
1078	14417.6	13034.8	78751.1	14429.2	12778.8
1079	14392.8	12923.4	78645.1	14418.7	12807
1080	14409	13022.9	78781.4	14404.5	12771.3
1081	14354.1	12913.9	78631.8	14476	12908.7
1082	14368.8	13007.1	78471.3	14469.5	12853.3
1083	14400.5	12943	78463.3	14487.2	12834.6
1084	14341.2	12979.2	78565.4	14383.2	12830.8
1085	14372.5	12949.7	78581.8	14452.2	12843.9
1086	14405.2	12993.5	78381.1	14378	12848.1
1087	14332	12909.8	78326.5	14461	12846.7
1088	14391.4	12955.1	78202.2	14428.9	12867.6
1089	14387.6	13016.9	78240.7	14381.2	12809.1
1090	14412.5	12982.9	78185.8	14428.3	12763.2
1091	14333.8	12981.6	78164	14402.1	12819.6
1092	14342.8	13014.7	77935.9	14429.2	12885.3
1093	14445	13048.5	78249.9	14446.1	12822.4
1094	14461.7	12943.6	77915.2	14458	12832.8
1095	14345.3	13007.1	77937.7	14474.2	12811.7
1096	14338.9	13074.1	77916.6	14440	12760.1
1097	14381.2	12989.6	77734.1	14394.4	12827.6
1098	14349	13011.8	77664.9	14465.7	12865.8
1099	14390.9	13002.3	77660.9	14455.7	12825.5
1100	14369.9	12993.1	77800.6	14454.2	12852.5
1101	14347.8	12968.7	77761.9	14431.6	12876
1102	14448.5	12949.8	77514	14484.7	12878.6
1103	14425.4	12981.4	77489.1	14430.9	12797
1104	14420.6	13060.4	77450.6	14438.8	12762.7
1105	14387.5	12989	77561.9	14411.5	12847.7
1106	14355.8	12949.6	77519.9	14497	12819.6
1107	14405.9	12994	77406.4	14417.5	12812
1108	14390.4	12902.6	77249.4	14386.4	12795.3
1109	14362.6	12953.8	77376.4	14458.1	12762.9
1110	14406.1	12959.3	77260.4	14499.1	12918.8
1111	14289.2	12972.4	77300.4	14501.3	12839.4
1112	14455.9	12953	77152	14476	12797.9
1113	14428.5	13010.1	77193.2	14410.4	12796.9
1114	14305.4	12913.9	77123.8	14427.4	12837.4
1115	14383.2	12942.4	77118.4	14425.9	12843.5
1116	14367.3	12934.9	76925.6	14348.3	12906.1
1117	14297.5	12935.9	76854.9	14420.3	12878.2
1118	14350.9	12950.2	76923.7	14412.3	12838.6
1119	14334.3	12991.6	76927.5	14443.7	12867.1
1120	14310.2	13023.9	77034.6	14430.7	12807.7
1121	14384.7	12953.3	76689.7	14443.6	12838.1
1122	14408.6	13024.1	76673.7	14407.5	12792.6
1123	14387.2	12947.1	76601.6	14497.8	12787.4
1124	14370.1	12988.2	76507.9	14365.3	12756.8
1125	14352	13051.5	76406.9	14425.9	12960.9
1126	14470.6	13028.5	76470.2	14429.1	12854
1127	14313	12951	76629.3	14420	12856.9
1128	14380.1	12979.8	76406.3	14432	12903.6
1129	14402	12993.7	76529.5	14458.9	12806.9
1130	14382.4	13029.4	76490	14386.8	12834
1131	14433.2	12975.4	76370.8	14421.3	12842.7
1132	14334.2	13002	76495.3	14440.3	12847.8
1133	14339.4	13002.5	76169.7	14398.6	12834.8
1134	14333.9	12896.1	76211.8	14400	12821.1
1135	14391.9	13015.3	76159.8	14425.7	12849.1
1136	14332.6	12930.2	76141.2	14402.9	12813.9
1137	14363.9	12990.2	76095	14361.8	12774.1
1138	14438.5	12956.9	75978.1	14478	12822.6
1139	14416.6	13004.9	76127.4	14426	12853.6
1140	14439	13004.4	75879.8	14346.2	12829.6
1141	14405.5	13015.2	76078.8	14378.5	12829.8
1142	14366.1	13039.1	75857.7	14346	12828
1143	14448.4	12897	75770.9	14435.7	12796.6
1144	14425.6	12921.9	75770.7	14461.9	12862.2
1145	14370.6	12966.3	75897.5	14403	12806.5
1146	14412.5	13001.6	75728.3	14370.8	12785.8
1147	14393.7	13023	75624.9	14379.1	12819.6
1148	14414.5	12935.7	75646.3	14331.2	12854.2
1149	14318.9	12987.9	75608.8	14464.3	12899.3
1150	14355.9	12965	75579.1	14355.9	12827.2
1151	14378.8	13017.1	75536.6	14434.7	12909.1
1152	14379.3	12943.6	75614.6	14408.2	12884.4
1153	14386	12974.7	75510.4	14415.2	12855.8
1154	14357	13011.7	75264.2	14420.6	12873.9
1155	14408.4	12985.5	75427.8	14418	12922.2
1156	14393.7	12943.8	75228.3	14452.9	12826.2
1157	14338.5	12997.6	75495.2	14426.7	12797.7
1158	14464	12908.6	75351.8	14413.7	12825.7
1159	14374.3	12959.3	75171.5	14377.3	12778.2
1160	14389.9	13005.3	75137.3	14483.3	12886.1
1161	14457.3	12985.7	75239.6	14382.4	12881.5
1162	14344.5	12958.2	75184.4	14498.1	12725.3
1163	14410	12971.5	74940.4	14411.4	12857.2
1164	14367.4	13051.7	75203.4	14445.4	12840.3
1165	14358.8	13003.6	74945.5	14410.7	12801.3
1166	14296	13023.9	74883.6	14400.3	12783
1167	14365.9	12996.8	74887.2	14369.8	12833.4
1168	14354.1	12928.7	74836.7	14414.5	12790.7
1169	14383.5	13033.5	74950.6	14463.5	12812.8
1170	14410.9	13034.6	74914.5	14404.1	12859.2
1171	14349.5	12943.3	74961.6	14355.7	12858.3
1172	14476.7	13011.4	74774.8	14380.1	12796
1173	14423.8	13058	74726.7	14430	12806.4
1174	14389.6	12954.7	74789.5	14403.5	12840
1175	14378.2	12979.2	74601.3	14459.9	12946.8
1176	14300.6	12972.1	74634	14463.4	12902.5
1177	14408.1	12970.4	74589.6	14419.4	12746.8
1178	14359.3	13032.7	74484.5	14489	12842.2
1179	14449.4	12951.9	74412.8	14421.3	12895
1180	14435.3	12986.8	74663.1	14443	12836.9
1181	14372.2	13023.3	74454.1	14417.7	12848.9
1182	14368.4	12951.5	74481	14445.2	12808.1
1183	14432.1	12909.9	74369.2	14378	12866.2
1184	14415.3	12952.2	74368.1	14406.4	12824.4
1185	14421.2	12915.7	74096.5	14467.3	12825.4
1186	14339.8	13004.2	74274.7	14335	12791.8
1187	14354	12987.9	74440	14398.7	12867.2
1188	14369.5	13041.8	74293.1	14394.7	12819.5
1189	14336.5	12884.9	74151.6	14397.7	12900.1
1190	14448.6	13014.7	74226.1	14428.7	12907.5
1191	14356.3	12950	73998.4	14485.6	12867.7
1192	14388.4	12980.2	74045.8	14459.1	12824.1
1193	14433.4	12946.3	74015	14346.5	12797.2
1194	14330.4	12977	74050.5	14377.6	12828.1
1195	14395.6	12990.3	74061.7	14458.1	12810.2
1196	14323.7	12954	73926.5	14448.9	12802.4
1197	14431.3	12945.1	73797.1	14363.3	12785.2
1198	14355.4	12977.9	73844.9	14400.2	12795.2
1199	14362.2	12977.8	73850.1	14431.8	12866.3
1200	14317.2	12982.6	73576.6	14386.3	12801.2
1201	14377.9	12984.3	73662.6	14371.6	12808
1202	14423	12939.5	73611.2	14389.7	12843.9
1203	14337.7	12946.8	73838	14366.7	12803.2
1204	14461.3	13038	73857.5	14357.4	12805.7
1205	14384.7	12967	73662.1	14439.8	12838.9
1206	14431.5	12982.2	73563.1	14458.3	12836.9
1207	14421.6	12969.4	73351.1	14416	12772.8
1208	14372.9	12920.1	73443.6	14396.9	12806.6
1209	14320	12943.4	73450.3	14361.8	12861.9
1210	14394.8	12959.5	73517.6	14364.7	12808.2
1211	14439.4	12941.2	73609.1	14419.8	12813.1
1212	14381.9	13003.9	73422.2	14367.2	12754.5
1213	14374.2	12984.3	73248.6	14369.8	12848.1
1214	14445.8	12935.6	73319	14421.4	12784.4
1215	14363.5	12989.2	73452.9	14428.4	12755
1216	14407.6	12985.1	73154	14436.5	12817.2
1217	14323.8	12936.7	73070.6	14410.6	12854.3
1218	14367.7	13005.7	73235.4	14370.9	12809.3
1219	14317.4	13036.5	73179.9	14391.1	12877.4
1220	14350.8	12948.5	73270.6	14392.2	12875.1
1221	14345.4	12956.1	73156.7	14426.2	12793.3
1222	14396.8	13051	73138.2	14341.8	12831.9
1223	14406	12920.3	73098.7	14453.7	12878.8
1224	14378.4	12948.5	73089.9	14397.6	12770.3
1225	14463.1	12978.7	73228.9	14322.1	12885
1226	14426.8	13008.1	73036.1	14419.8	12848.6
1227	14338	12939.8	72919.8	14419.8	12854.1
1228	14435.6	12898.8	72933.1	14363.9	12831.4
1229	14445.9	12965.6	73003.8	14285.8	12795.6
1230	14374.7	13021.7	72792.1	14336.9	12807.6
1231	14422.9	12987.9	72827	14395.2	12883.3
1232	14449.9	12920.1	72751.8	14335.5	12782.5
1233	14352.1	13053.3	72784.2	14394.1	12836.7
1234	14458.6	13026.9	72674.2	14382.4	12851.4
1235	14399.3	13023	72712.8	14356.3	12787
1236	14372.6	12928.3	72615.5	14353.4	12832.8
1237	14306.1	12975.8	72568.4	14337.3	12798.9
1238	14365.8	12902.9	72627.4	14354.1	12869
1239	14399.2	13022.3	72626.7	14419.6	12878
1240	14508.2	12988.8	72810.6	14392.1	12780.2
1241	14437	12944.9	72551.2	14357.2	12851.4
1242	14392	12961.7	72506.2	14338.9	12855.3
1243	14404.9	12959.4	72495.2	14356.9	12808.4
1244	14364	12963.2	72550.6	14334.5	12845.1
1245	14458.4	12926.6	72494.8	14456.8	12817.3
1246	14513.7	12955.1	72426.2	14379.2	12820.4
1247	14402.9	12932.6	72320.4	14344.8	12827.2
1248	14382.4	12933.7	72266.9	14495.9	12832.8
1249	14373.6	12947.6	72263.7	14311.1	12752.1
1250	14384	12957.9	72251.7	14372.6	12827.8
1251	14384.4	13045	72336.7	14381.3	12821.7
1252	14350.7	12990.1	72334.4	14339	12839
1253	14300.6	12949.8	72117	14406.4	12798.4
1254	14445.5	13051.4	72393.1	14396.8	12814.7
1255	14379.5	12950.4	72022.2	14379.7	12804.4
1256	14344.5	13031.2	72187	14412.6	12811.3
1257	14368	12909.4	72084.3	14360.4	12852.4
1258	14304.1	12900.4	72221.4	14415.2	12848.2
1259	14407.5	12997.6	71903.8	14331.7	12819.6
1260	14304	12961.6	72063	14426.3	12797
1261	14383.2	13012.5	72048.4	14449.6	12873.3
1262	14404.9	12946.2	72027.4	14459.3	12806.2
1263	14237.6	12904.3	71877	14392.6	12788.9
1264	14385.6	12924.5	71964.6	14300.8	12731.9
1265	14405.3	12981.5	71902.6	14325.2	12852.8
1266	14297.8	12940.2	71890.4	14354.9	12748.8
1267	14396.6	12960.4	71763	14466.7	12828.7
1268	14381.9	12985.4	71874.3	14374.9	12786.3
1269	14442.8	12984.9	71706.8	14352.5	12796.8
1270	14359.7	13020	71654.6	14397.2	12873
1271	14392.8	12944.8	71709.2	14420.5	12868.2
1272	14451.2	12936.8	71618.5	14374.1	12817
1273	14463.1	13027.5	71784.3	14412.7	12808.1
1274	14281.2	12968.9	71714.2	14351.7	12807.6
1275	14360.9	12962.8	71672.7	14480.3	12859.4
1276	14355.1	12981.3	71555.7	14409.3	12803
1277	14397.8	12981.9	71596.7	14377.4	12746.1
1278	14377.9	12941.8	71536.8	14390.9	12795.1
1279	14382.2	12965.9	71630.9	14348.2	12781.9
1280	14354.7	13002.2	71461.5	14358.3	12931.3
1281	14273.4	12929.2	71580.7	14349.4	12801.5
1282	14360.5	12979.3	71306.5	14284.6	12754.8
1283	14450.3	13007.6	71470.8	14339.4	12835
1284	14391.7	12980.7	71421.4	14295	12802.9
1285	14292.1	12999.7	71343.3	14371.9	12881.1
1286	14346.8	12896.2	71326.8	14429.4	12863.1
1287	14395.4	12946.2	71198.5	14382.2	12784.4
1288	14435.3	12963.7	71255.5	14345	12762.6
1289	14338	12937.5	71413.3	14363.5	12826.1
1290	14383.9	12980.8	71167.6	14312.9	12819.8
1291	14384	12918.2	71246.2	14318.9	12848.9
1292	14453.2	13065.2	71036.4	14413	12802.2
1293	14348.9	12883.9	71094.3	14314.3	12881.3
1294	14355.2	12910.7	71228.9	14338.9	12836.6
1295	14323.8	12932.4	71255.9	14368.5	12806.7
1296	14369.6	12992	71125.5	14396.6	12852.4
1297	14345.9	13058.9	71223	14405.9	12863.2
1298	14340.5	13003.4	71148	14348.4	12858.2
1299	14400.3	12973.1	71004.8	14416.3	12801.9
1300	14334.6	12920.8	71098.1	14392.6	12737.5
1301	14369.5	12883.8	71086.4	14369.6	12855.8
1302	14459.7	12940.9	71077.2	14356.8	12791.9
1303	14422.4	13025.6	70781.4	14284	12764.1
1304	14365.2	13004.3	70947	14395	12778
1305	14373.3	12934.9	71049.1	14353	12803.6
1306	14358.9	12926.1	70770.5	14304.5	12754.8
1307	14392.4	12951.5	70971	14334	12796.2
1308	14365.2	12986.2	70857.2	14356.4	12770.4
1309	14442.5	12933.5	70924.5	14245.3	12778.4
1310	14407.1	12929.3	70808.4	14390.2	12819
1311	14386.3	12964.7	70986.4	14394.9	12814.8
1312	14359.2	12915.2	70878.4	14260.2	12835.9
1313	14392.6	13003.9	70730.5	14329	12844.9
1314	14401.1	12950.4	70701.9	14401.6	12816.1
1315	14440.8	12946.7	70700.8	14342.5	12828.4
1316	14413.5	12914.5	70616.7	14264.9	12856
1317	14375.7	12941.6	70566.8	14300.1	12777.8
1318	14330.4	12919.2	70693.8	14280.1	12807.5
1319	14316	12916.6	70538.2	14444.3	12751.8
1320	14412.7	13028.2	70569.9	14262.4	12768.4
1321	14345	12942.7	70731.9	14265.8	12826.1
1322	14365.3	12977.8	70525.2	14332.8	12815.8
1323	14356.2	12986.8	70485.7	14349	12831.4
1324	14367.4	12904.3	70327.6	14352.1	12814.3
1325	14413	12998.1	70481.1	14416.9	12840.8
1326	14402.5	12914.9	70533.9	14393.9	12790.2
1327	14333.6	13039.3	70451.2	14285.1	12788.2
1328	14311.8	12961.4	70387.6	14318.3	12877.9
1329	14370.8	12954	70339.2	14376.6	12838.8
1330	14329.7	12914.3	70507	14409.9	12827.5
1331	14373.3	12939.5	70259	14380.7	12793.9
1332	14406.4	12966.8	70359.2	14311.2	12768.5
1333	14368.6	13026.5	70287.8	14370.5	12743.2
1334	14338.9	12927.8	70349.5	14392.6	12818.2
1335	14381.7	12966.2	70236.5	14352.2	12843.1
1336	14413.2	12954.8	70276.2	14344.2	12762.2
1337	14421.2	12957.6	70240.4	14275.9	12856.7
1338	14437	12903.3	70219.2	14423.7	12859.2
1339	14295.8	12980	70222.6	14326.3	12840.5
1340	14419.6	12906.9	70204.5	14401	12807.7
1341	14517.3	12959.9	70112.8	14302.5	12812.2
1342	14407.1	12996.1	70244.1	14299	12839.1
1343	14424.4	12978.7	70152.5	14365	12864.7
1344	14373.7	12918.4	70058.5	14372.4	12797.8
1345	14446.9	12988.9	70113.3	14342.3	12842
1346	14386.1	12933.8	70091.4	14429.5	12813.3
1347	14359.4	12969.1	70221.5	14432.7	12778.9
1348	14351.6	12910.7	70252.1	14287.7	12826.5
1349	14375.6	12999.4	70048.2	14330.2	12861.8
1350	14363.8	12950.5	70236.6	14320.1	12774.9
1351	14355.8	12944.9	69948.3	14336	12789.7
1352	14441.8	12965.8	70034.8	14349.4	12816.5
1353	14327.9	12964.4	69958.8	14236.5	12851.2
1354	14436.1	12974.7	69753.6	14371.3	12892.5
1355	14344.3	12956.1	70021.6	14368.8	12838.9
1356	14465.4	12958.1	69870.3	14386.3	12853.2
1357	14354.2	12971.7	69893.8	14339.9	12842.5
1358	14349.5	12951.3	69875.9	14361.6	12825.7
1359	14415.2	12971	69731.7	14367.4	12804.8
1360	14342.8	12937.3	69819.5	14304.9	12763.6
1361	14394.3	12985	69813.3	14336.5	12811.1
1362	14420	13016.4	69723.9	14371.8	12846.2
1363	14331.7	13011.4	69608.2	14324.6	12822.9
1364	14410	12970.4	69569.7	14358.6	12815.6
1365	14387.7	12961.2	69745.4	14273.5	12787.3
1366	14368.1	12970.3	69605.7	14266.3	12847.9
1367	14342.3	12910.9	69745.6	14360.4	12748.9
1368	14370.8	12941.4	69592.6	14426.3	12850.6
1369	14385	12926.9	69835.8	14347	12840.3
1370	14242.7	13006	69532.2	14309.6	12790.6
1371	14396.6	12967.1	69738	14370.4	12825.4
1372	14380.7	12882.6	69536.4	14311.7	12900.8
1373	14377.6	12917.8	69481	14317.3	12836.6
1374	14410	12924.3	69546.4	14340.4	12821.7
1375	14378.4	12935.8	69567	14316.8	12844.3
1376	14371.5	12959.7	69515.1	14371.6	12829.4
1377	14371.5	13020.6	69510.6	14364.1	12843.3
1378	14366.1	12855.5	69600.8	14299.8	12869.7
1379	14406.1	12939.8	69447.8	14342	12872.2
1380	14406.9	12962.6	69514.3	14358.1	12814.7
1381	14371.8	12957.6	69332.2	14338.9	12862.4
1382	14423.1	13007.9	69551.9	14385.4	12798.7
1383	14387.3	12928.2	69465.7	14397.3	12840
1384	14421.9	12942.4	69335.1	14323.5	12826.2
1385	14384.6	12974.4	69266.8	14299.1	12776.1
1386	14428.9	12919.9	69300.4	14307.7	12789.5
1387	14356.8	12908.2	69340.3	14404.7	12779.4
1388	14379.6	12949.5	69287.2	14337.4	12815.8
1389	14409	12965.2	69128.7	14365.5	12829.7
1390	14338.1	12933.7	69352.7	14351.9	12836.7
1391	14376.5	13016.2	69184	14415.4	12826.5
1392	14366.2	13017	69279.2	14267	12702.7
1393	14355.6	12960.8	69056.3	14362.7	12847.7
1394	14386.1	12931.4	69053.6	14297	12828.3
1395	14406.8	13002.7	69146.3	14326.8	12873.7
1396	14422	12912.1	69198.8	14384.2	12744.3
1397	14335.3	12919.8	69135.9	14340.5	12760.3
1398	14395.8	12991.1	69247.3	14306.7	12863.5
1399	14358.7	12950.9	69194.1	14328.2	12742.7
1400	14367.2	12910.6	69091.2	14284.7	12826.6
1401	14350.7	12961.6	69056.9	14382.7	12782.7
1402	14416.3	12988.1	69099	14331.9	12886
1403	14478.9	12955.7	69150.1	14407.2	12839.7
1404	14438.7	12870.4	69066.3	14380.3	12791.5
1405	14411.2	12898.8	68917.2	14309.4	12798.6
1406	14325.3	13000.3	68985.1	14314.2	12763.4
1407	14350.9	13075.9	68894.4	14379.7	12836.7
1408	14411.2	12975.3	69075.4	14327.5	12880.5
1409	14333.6	12976.4	68935.1	14334.2	12858.5
1410	14330.1	12909	68933.1	14316.4	12808.7
1411	14454.8	12938.4	69030.2	14351.5	12788.4
1412	14407	12917.9	68755.9	14359.5	12804.5
1413	14410.7	12934.8	68987.8	14329.6	12791.9
1414	14359.5	12904.5	68981.3	14349.7	12859.2
1415	14331	12921.9	69006.5	14358.3	12755.8
1416	14407.1	12954.6	68935.2	14349.6	12830.1
1417	14375.7	13008.6	69101.7	14285.5	12839.8
1418	14435.9	12974.5	68724.2	14364.9	12824.2
1419	14391.9	12927.7	68686.8	14428.4	12778.3
1420	14398.8	12954.4	68782.4	14295	12838.4
1421	14389	13002.6	68952.7	14355.5	12763.2
1422	14295.4	12955.9	68810.7	14387.9	12810.6
1423	14385.8	12906.4	68751.1	14309.7	12801.7
1424	14422.4	12956.6	68803.4	14391.7	12809.9
1425	14353.7	12932.3	68651.9	14381.4	12786.7
1426	14346.7	12976.7	68657	14441.5	12824
1427	14294.5	12954.3	68805.2	14363.9	12821
1428	14340.6	12955.2	68632.8	14372.2	12816
1429	14392.8	12906.7	68637.1	14316.4	12768.2
1430	14408.5	12947.9	68571.3	14328.6	12800.6
1431	14364.6	12926.4	68565.6	14318.6	12783
1432	14376	12979.5	68650	14308.1	12792.8
1433	14420.8	12918.9	68447.1	14285.9	12769.5
1434	14376.4	12989.6	68572.9	14352.2	12783.5
1435	14328.8	12975.7	68623.6	14311.7	12765.8
1436	14340.3	12967	68481.4	14268.7	12713.4
1437	14329.1	12955.1	68499.3	14322.7	12777.6
1438	14319.2	12986.2	68663.8	14364.1	12785.9
1439	14310.7	12948.2	68543.7	14349.5	12811.1
1440	14276.9	12949.7	68500.9	14339.4	12859.1
1441	14374.3	12927.8	68487	14355.7	12872.3
1442	14443.1	12975.3	68447.9	14284.9	12849.8
1443	14328.2	12952.4	68380.3	14309.3	12837
1444	14365.3	12996	68464.8	14324.4	12691.9
1445	14414.1	12879.8	68364.1	14385.9	12803.3
1446	14327	13038.7	68512.1	14287.5	12823.4
1447	14381.7	12973.8	68290	14295	12873.5
1448	14394.8	12882.1	68333.7	14393.9	12831.8
1449	14361.5	12967.7	68204.3	14428.6	12767.5
1450	14460.7	12945.5	68270.1	14338.6	12829.3
1451	14401.5	12997.8	68307.9	14276.1	12865.3
1452	14301.8	12940.2	68296.8	14345.5	12802.4
1453	14329.2	12907.2	68183.2	14323.7	12786.7
1454	14354.4	12999.8	68381.8	14319.5	12869.6
1455	14390.6	12968.8	68380.2	14294.4	12765.1
1456	14393.4	12957.6	68198.5	14268.4	12761.8
1457	14374.1	12973.3	68226.3	14340.3	12809.3
1458	14380.1	12959	68277.7	14260	12797.9
1459	14310.4	12934.4	68310.4	14278.4	12817.1
1460	14408.5	12945.6	68226.9	14273	12787.7
1461	14344.6	12934	67954.2	14296	12795.7
1462	14326	12918.1	68176.2	14288.8	12793.9
1463	14414.5	12865.6	68198.5	14298.7	12750.4
1464	14308.3	12830.7	68209.2	14328.6	12783.5
1465	14346.8	13040.2	68102.8	14332.3	12776.1
1466	14364.4	12945.5	68161.5	14230	12857
1467	14341.7	12929.7	68122.9	14311.3	12793.2
1468	14403.4	12967.1	68106.7	14262.2	12789.1
1469	14436.1	12926.3	68075.6	14338.5	12787.5
1470	14344.6	12982.3	68056.1	14229	12852.3
1471	14415.1	12935.7	68057.8	14288.7	12864.2
1472	14275.2	12961.5	68022.7	14277.1	12833
1473	14428.6	13014	67986.7	14330.3	12861.2
1474	14439.5	13039.1	68031.4	14302.9	12799.6
1475	14401.9	12945.4	68046	14359.5	12746.8
1476	14403.8	12976.7	67897.4	14277.8	12885.1
1477	14377	12962.6	68021	14306.5	12782.6
1478	14358.8	12994.2	67920.5	14349.2	12819.3
1479	14361.1	12970.2	67860.3	14342	12791.3
1480	14308.2	12956.1	67864.7	14293.4	12797.3
1481	14411.2	12936.8	67874.8	14274.8	12875.9
1482	14401.2	12941.7	67944	14303.6	12906
1483	14387.9	12974.6	67824	14356.3	12780.4
1484	14420	12965.6	67756.9	14383.8	12805
1485	14402.6	12925.2	67894.6	14231.1	12775.9
1486	14377.7	12994.2	67948	14311.8	12795.1
1487	14413.1	12953.7	67857.1	14277.4	12894.5
1488	14433.7	12968.8	67869.9	14393.7	12823.3
1489	14349.5	12905.1	67849.1	14235.3	12851.8
1490	14376.8	12918.1	67933.6	14349.9	12767.1
1491	14411	12909.2	67651.3	14324.4	12806.3
1492	14405.9	12897.6	67698.2	14239.1	12794.7
1493	14378.6	12927.7	67717.1	14310.4	12850.5
1494	14393.3	12901.4	67774.9	14266.1	12815.6
1495	14345.7	12921.7	67845.6	14388	12799.3
1496	14334	13000.2	67902.6	14363.1	12813.3
1497	14421.3	12986	67776.3	14343.4	12773
1498	14357.6	12902.3	67707.8	14376.7	12797.7
1499	14463.2	12947	67614.6	14246.1	12837.5
1500	14320	12940	67655.9	14335.3	12817.1
1501	14289.8	12983	67600.7	14276	12828.7
1502	14414.4	12971.3	67497.8	14367.2	12789.9
1503	14394	12937.6	67812.2	14331	12789.2
1504	14418.7	12967.6	67577.5	14340.2	12803
1505	14457.8	13003.7	67664.6	14263.2	12834.5
1506	14418.1	13022.4	67549.5	14273.3	12750.6
1507	14413.2	12964.3	67521.1	14244.8	12788.1
1508	14412	12937.2	67538.9	14275.6	12735.8
1509	14363.8	12983.7	67587.2	14353.7	12850.7
1510	14331.4	12942.3	67254.3	14336.6	12827.4
1511	14404.5	12951.4	67579.8	14255	12776.5
1512	14371.1	12990.5	67426.7	14278.9	12829.8
1513	14391.7	12981	67559.1	14286.3	12765.1
1514	14356.9	12883.6	67392.2	14272.2	12796
1515	14404.1	12965.1	67429.7	14323.1	12853.8
1516	14362.1	12908.3	67317.9	14275.3	12784.1
1517	14454.9	12956.9	67483.1	14327.6	12799
1518	14351.1	12924.8	67401.4	14366	12812.1
1519	14344	13043.1	67313.1	14277.6	12805.4
1520	14332.8	12940.1	67598.6	14285.8	12805.8
1521	14387.2	12955.7	67487.1	14314.9	12774.6
1522	14393.2	12924.2	67319.9	14349.4	12790.3
1523	14481.8	12919.1	67177.1	14356.4	12876.3
1524	14403.6	12955.5	67372.6	14320.1	12769.9
1525	14434.8	12978.3	67419.5	14317	12822.1
1526	14348.9	12923.3	67292.3	14276	12894.7
1527	14381	12926.4	67305.8	14347.5	12817.9
1528	14423.8	12926.3	67319.4	14325.8	12798.3
1529	14396.9	12876	67270.9	14222.4	12771.3
1530	14381.6	12859.3	67125.6	14272.2	12811.3
1531	14380.1	12877.7	67281	14322	12802.3
1532	14382.5	12981.7	67236.6	14255.8	12757.8
1533	14378.7	12937.1	67198.6	14254.2	12856.9
1534	14375.6	12922.7	67140.1	14283.2	12860.8
1535	14327	12949.2	67337.2	14295	12820.5
1536	14423.9	12947	67163.9	14270.5	12859.1
1537	14369.5	12864.8	67088.4	14266.4	12808.7
1538	14324.5	12863.7	67285	14245.7	12775.4
1539	14366.2	12935	67152.9	14274.2	12799.2
1540	14424.5	12902.8	67060.2	14288	12838.1
1541	14397.4	12947.9	67131.1	14389.8	12821.1
1542	14371.3	12907.9	67124.4	14260.9	12689.9
1543	14339.7	12861.2	66958.8	14235.6	12828.4
1544	14392.4	12922	67102.3	14322.3	12825.2
1545	14418	12952.8	67030.1	14340.9	12759.7
1546	14422.9	12963.1	67079	14303.3	12825.4
1547	14428.2	12925.5	67013.3	14350.6	12796.1
1548	14292.8	12895.1	67066.4	14180.3	12845.4
1549	14423.7	12903.7	67157.3	14305	12808.6
1550	14447.2	12955.3	66942.5	14260.4	12754.4
1551	14356	12964	66964.2	14252.7	12749.3
1552	14346.9	12968.3	66947.4	14297.8	12788.3
1553	14378	12946.5	66796.7	14294.1	12864.1
1554	14357.5	13029.9	67004.3	14238.1	12790.1
1555	14326.5	12968.8	66987.7	14334.5	12860.8
1556	14355.7	12996.4	66929.8	14320.3	12800.1
1557	14466.4	12923.3	66917.8	14315.7	12847.7
1558	14395.4	12945.9	66850.4	14301.5	12773.8
1559	14338.7	12906.8	67010.8	14217.1	12826.8
1560	14384.3	12860.3	66920.9	14295	12880.7
1561	14455.3	12927.2	66928.3	14323.9	12801.7
1562	14310.2	12945.5	66890.3	14279.4	12794.9
1563	14400.7	12948.9	66962.9	14381.6	12794.2
1564	14412.6	13002.6	66965.6	14303.9	12809.7
1565	14362.7	12916.7	66862.8	14298.8	12796.1
1566	14424.6	12861.1	66827.8	14334.6	12858.9
1567	14358.8	12877.4	66983.2	14244.5	12899.5
1568	14419.4	12989.7	66788.5	14289.3	12788.7
1569	14306.4	12981.8	66871.3	14335.6	12839.6
1570	14390	12926.1	66643.1	14195.2	12822.4
1571	14444.4	12999.3	66697.4	14288.5	12784.3
1572	14410.3	12900.1	66867.1	14342	12823
1573	14345.4	12940.5	66635.8	14347	12850.5
1574	14335.4	12938.8	66794.6	14308	12811.4
1575	14336.2	12958.3	66657.5	14332.5	12812.8
1576	14388.9	12993.3	66809.5	14252.9	12815.2
1577	14368.1	12863.5	66722.7	14346.4	12852.4
1578	14329.7	12962.2	66882	14279.7	12807
1579	14371.1	12952	66625.3	14290.9	12851.9
1580	14460.5	12985.4	66641	14332.1	12836.6
1581	14369	12913.5	66706.2	14389.3	12833.7
1582	14356.8	12933.2	66701.7	14228.2	12832.2
1583	14367.1	12897.9	66555.1	14237.6	12878.5
1584	14406.7	12979.1	66743.4	14330.9	12843.3
1585	14324.9	12871.7	66651	14309.8	12786.5
1586	14438	12898.9	66717.2	14304.7	12825.9
1587	14476.9	12928.9	66633.9	14263.3	12835.6
1588	14327	12903.1	66677.4	14317.9	12782.2
1589	14402.1	12871.5	66608.3	14312.8	12779.1
1590	14377.2	12886.4	66657.5	14290.3	12828
1591	14438	12923.9	66453.4	14300.6	12835.2
1592	14370.3	12944.4	66535.9	14329.8	12826.7
1593	14343.2	12909.4	66746.6	14255.2	12889.1
1594	14360	12967	66477	14258.8	12806.8
1595	14390.4	12924.9	66453.2	14199.5	12835.8
1596	14375	12945.3	66373.7	14220.9	12824.3
1597	14370.7	12970.7	66617.1	14250.5	12835.2
1598	14325.1	12896	66523.5	14259.8	12769.1
1599	14374.7	12997.2	66729.4	14315.9	12900.6
1600	14409.1	12879.3	66503.5	14248.8	12824.9
1601	14356.7	12922.3	66533.3	14298.3	12804.5
1602	14370.5	12962.2	66674.8	14261.9	12840
1603	14384	12888.1	66590.2	14314.4	12841.5
1604	14320.7	12903.3	66361.7	14260.7	12834.9
1605	14362.8	12846.4	66393.3	14336	12796.3
1606	14461.9	12923.9	66387.2	14240.9	12788.4
1607	14366.4	12927	66531.5	14336.5	12806.2
1608	14331	12951.3	66466.9	14268.7	12771.8
1609	14341.1	12952.1	66327.1	14286.8	12867.6
1610	14374.7	12863.4	66528.1	14274.5	12836.4
1611	14346.4	13028.3	66446.9	14358.6	12873.5
1612	14353.9	12842.5	66429.5	14262.4	12789.3
1613	14357.6	12918.3	66422.7	14225.3	12855.7
1614	14292.1	13002.8	66211	14335	12849
1615	14376.7	12910.8	66462.7	14339.2	12808.5
1616	14412.5	12942.6	66392.8	14277.9	12808.8
1617	14377	12907	66442.9	14289.8	12843.8
1618	14427.4	12943.5	66215.5	14308.1	12871
1619	14344.2	12993.8	66348.5	14329	12859.8
1620	14395.2	12940.6	66176.2	14325.6	12833.4
1621	14415.7	12928.2	66291.7	14233.4	12796.4
1622	14428.4	12981.5	66272.7	14293.5	12833.8
1623	14368.7	12934.2	66229.1	14321.3	12832.8
1624	14439.2	13022.3	66240.9	14269.8	12840.6
1625	14357.6	12907.4	66303.1	14336.5	12759.6
1626	14423.3	12895.7	66361.6	14304.3	12795
1627	14335.9	12942.3	66285.4	14231	12759.1
1628	14358	12910.1	66309.8	14207.5	12862.9
1629	14404.7	12898.1	66248.3	14231.1	12829.4
1630	14321.5	12869	66145.2	14241.6	12850.1
1631	14364.6	12835.9	66262	14287.4	12825.9
1632	14274.2	12847.8	66223.8	14254.6	12899.5
1633	14321.2	12994.9	66150.4	14412.1	12837.5
1634	14387.7	12858.4	66296.8	14348	12812.2
1635	14384.6	12934.6	66184.7	14300.9	12772.5
1636	14308.1	12918.2	66130.9	14321.6	12807
1637	14337.9	12930.5	66318.9	14299.7	12821
1638	14341.4	12906.2	66108.2	14311.8	12784.2
1639	14327.3	12870.4	66156.6	14268.7	12827.6
1640	14374	12866.2	66088.8	14272.1	12882.8
1641	14398.9	12914.2	65970	14243.7	12846.6
1642	14400.1	12986.3	66230.2	14279.5	12828.6
1643	14359.3	12918.9	66147.1	14243.9	12724.8
1644	14333.6	12956.4	66002.3	14227.4	12867.9
1645	14266.8	12920.6	65925.1	14303.5	12890.2
1646	14353.1	12935.1	66054.4	14299.1	12838.4
1647	14475.8	13023.8	66118.9	14246.1	12803.7
1648	14364.1	12882	66111.1	14190.1	12734
1649	14408	13006.4	66115.6	14306.3	12821.3
1650	14421.7	12953.8	65943.2	14357.4	12787.8
1651	14216.1	12915.6	66028.9	14271.1	12853.5
1652	14386.7	12976.3	66006.9	14284.6	12821.5
1653	14466	12954.6	65855.7	14285.4	12818.5
1654	14369.7	12891.3	66046.7	14326.6	12781.2
1655	14372.6	12966.6	66034.2	14303.8	12840
1656	14359.9	12836.4	65831.2	14265.5	12812.3
1657	14443.9	12869	65918.6	14223.1	12817.2
1658	14398	12878.6	65806.5	14259.6	12793.2
1659	14385.9	12874.1	65957.1	14330.2	12778.3
1660	14433.7	12880.4	66042.3	14328.7	12812.5
1661	14434	12982.9	65947.1	14310.1	12922.2
1662	14358.3	12854.3	65814.8	14362.6	12811.3
1663	14329.4	12944	65866.7	14319.5	12829.4
1664	14351.1	12902.1	65804.8	14327.9	12810.7
1665	14392	12919.9	65922	14291.6	12762
1666	14318.9	12939.1	66112.7	14243.2	12856.1
1667	14296.5	12906.1	65932.4	14301.9	12886.1
1668	14387.9	12919.7	65760.4	14357	12840
1669	14355.6	12924.4	65853.1	14255.3	12770.9
1670	14359.6	12925	65872.9	14286.9	12860.1
1671	14306.9	12871.3	65780.9	14276.5	12781.8
1672	14362.4	12924.1	65734.5	14295.4	12827.5
1673	14378.6	12889	65827.1	14303.8	12801
1674	14384	12867.5	65680.1	14282.4	12816.6
1675	14343.5	12919.5	65865.4	14362.9	12856.6
1676	14374.7	12958	65833.4	14254.8	12780.3
1677	14338.2	12891.3	65823.2	14328.7	12808.7
1678	14339.3	12861.8	65905.6	14272	12881.7
1679	14400.5	12936.7	65676.6	14285.9	12876.3
1680	14416.5	12961.8	65904.7	14270.1	12747.7
1681	14412.8	12897.2	65708.4	14283.1	12822.7
1682	14333	12868.4	65795	14327.1	12799.2
1683	14360.8	12921.4	65678.7	14249.3	12820.8
1684	14446.8	12899.1	65768.6	14296.6	12886.2
1685	14338.8	12904.2	65804.6	14325.9	12816.8
1686	14412.4	12892.9	65789.3	14263.1	12773
1687	14420.5	13034.3	65660.2	14275.3	12840.5
1688	14411	12986.8	65627	14234.9	12842.4
1689	14421	12877.1	65688.1	14322.8	12789.1
1690	14328.5	12904.6	65635.8	14326.4	12814.9
1691	14321.3	12942.7	65729.9	14261.1	12749.5
1692	14346.8	12962.7	65589.7	14310.3	12806.2
1693	14390	12847.7	65599.7	14251.6	12825.2
1694	14394.8	12947.4	65692.6	14257.8	12828.4
1695	14473	12998.3	65641.9	14273.9	12857.7
1696	14366	12877.4	65615.9	14309.3	12813.2
1697	14426.3	12903.9	65548.5	14321.4	12885.1
1698	14407.6	13011.6	65677.3	14278.9	12795.4
1699	14411.6	12958.5	65597.5	14206.4	12782.2
1700	14383.8	12924.4	65482.7	14303.4	12816.9
1701	14447.7	12902.9	65510	14227	12813
1702	14368	12917.2	65466.7	14276.5	12825.9
1703	14447.1	12892.6	65288.6	14281.6	12863.2
1704	14356.1	12890	65502.8	14333.8	12861.7
1705	14342.7	12928.8	65492.3	14314.8	12818
1706	14423.3	12901.1	65443.3	14246.2	12776.3
1707	14374.8	13015.3	65363.5	14263.2	12828.9
1708	14332.1	12952.6	65530.3	14236.6	12827.9
1709	14369.9	12914.2	65562.2	14235.8	12798.1
1710	14376.1	12853.7	65399.6	14226.2	12883.7
1711	14420.6	12921.8	65549.1	14312.5	12823.8
1712	14365.1	12872.9	65405.4	14267.5	12852.9
1713	14384.7	12996.8	65432.8	14328.5	12822.7
1714	14301.9	12905.9	65418.4	14227.9	12858.1
1715	14401.1	12947.8	65458.2	14243.6	12874.1
1716	14348.2	12982.6	65570.1	14227.3	12856.6
1717	14382.2	12960.1	65279.7	14214.4	12814
1718	14356.7	12908.9	65458.9	14244.2	12849.3
1719	14374.3	12911	65422.2	14299.1	12801.8
1720	14338	12951.8	65474.6	14256.1	12801.6
1721	14353.5	12891.1	65660.6	14258.7	12790.8
1722	14331.3	13008.9	65434.1	14313.1	12838.7
1723	14345.1	12914.7	65286	14238	12840.2
1724	14400.3	12924.5	65357	14275.5	12857.3
1725	14371	12888.1	65378.7	14267.5	12737.1
1726	14396.4	12889.7	65372.6	14295	12833
1727	14377.6	12858	65269.8	14304.9	12846.6
1728	14302.4	12945.2	65136.8	14264.4	12733.3
1729	14381.4	12914.5	65385.3	14254.4	12810.6
1730	14454.1	12905.4	65522.5	14267.1	12821.9
1731	14429.5	12837.8	65288.3	14225.3	12860.8
1732	14336.4	12903.4	65288.3	14261	12876.4
1733	14366.1	12901.9	65509.4	14243	12805.5
1734	14366.4	12946	65332.2	14251.3	12852.5
1735	14308.2	12964.2	65346	14318.5	12835
1736	14399.3	12951.8	65354.1	14324.5	12852.7
1737	14397.3	12892.7	65307.1	14327.9	12753.4
1738	14319.4	12995.5	65264.2	14346.7	12805.2
1739	14464.2	12887.6	65208.6	14373.9	12837.2
1740	14337.9	12889.4	65297.6	14219.8	12797.4
1741	14441.7	12904.4	65166.1	14211.2	12824.1
1742	14247.1	12928.5	65195.7	14261.9	12822.9
1743	14362.3	12882.4	65191	14299.8	12939
1744	14341	12862.5	65385.8	14248.7	12839.6
1745	14453.3	12881.3	65106.1	14320	12841
1746	14407.2	12900.9	65258.9	14248.2	12779.3
1747	14333.2	12912.4	65225.3	14305.3	12862.5
1748	14409.2	12950	65198.1	14263.6	12820.5
1749	14405.7	12914.2	65154.9	14176.1	12807.2
1750	14419.9	12923.3	65174.2	14272	12858.2
1751	14354	12890.2	64999.4	14266.7	12822.2
1752	14449	12941.1	65195.7	14325.1	12820.8
1753	14437.5	12956.4	65215.9	14245.9	12798.9
1754	14347.5	12917.7	65291.4	14282.9	12786.5
1755	14406.7	12940.6	65363.3	14300.5	12841.5
1756	14365.7	12873.5	65056.4	14282.8	12804.9
1757	14312.9	12928.1	65174.6	14289	12800
1758	14368.1	12813.3	65020.5	14358.9	12778.7
1759	14441.8	12894.9	65113	14229.2	12738.1
1760	14469.6	12961.8	65037.7	14288.2	12844
1761	14443.2	12870.1	65046.2	14232.8	12811.9
1762	14343.8	12810.1	65140	14285.4	12829.3
1763	14402.2	12889.3	64982.1	14256.9	12826.3
1764	14335.2	12897.9	65070.1	14288.9	12751.2
1765	14382.5	12990.8	65053	14224.2	12845.7
1766	14367.7	12868.2	65241.9	14255.4	12808.3
1767	14363.7	12906.8	65000.8	14256.7	12871.8
1768	14414.4	13024.7	64995.4	14318.1	12791.2
1769	14329.4	12948.4	65108.5	14295.7	12779
1770	14403.8	12936.8	65207.4	14208.3	12841
1771	14293.3	12890.3	65181.3	14274.3	12858.3
1772	14450.3	12925.2	65117	14342.3	12843
1773	14387.8	12909	64990.4	14206.2	12804.4
1774	14369.1	12936.1	65104.3	14316.3	12783.8
1775	14347	12876.2	65132	14259.3	12849.1
1776	14415.3	12911	64864.8	14295.5	12801.3
1777	14389.8	12859.3	64967.9	14227.4	12733.7
1778	14358.3	12916.9	65062.6	14280.5	12842.5
1779	14423.2	12938.4	64958.4	14249.1	12868.3
1780	14360.2	12953.5	64949.2	14250.3	12810.5
1781	14362.2	12947.4	64924.6	14216	12857.3
1782	14364.8	12874.3	65093.1	14318.1	12794.8
1783	14410.4	12923.6	64919.6	14282.5	12735.7
1784	14322.2	12958.2	64962.1	14269	12844.3
1785	14306	12936.9	64819.3	14249.6	12868.1
1786	14333.5	12885.9	64812.3	14298.2	12786.1
1787	14397.9	12942.1	64926	14212.3	12813.5
1788	14375.8	12871.7	64812.4	14181.7	12742
1789	14336.2	12867.3	64911	14340.4	12753.4
1790	14296	12987.1	64707.8	14233.2	12868
1791	14316	12937.7	65044.5	14353.1	12847.2
1792	14405.8	12918.3	64910.7	14368.8	12798.5
1793	14279.9	12902.9	64784.2	14215.1	12769.8
1794	14414.3	13017.6	64869.5	14324.8	12814
1795	14347.8	12838.1	64702.9	14268.7	12743.8
1796	14332.7	12912.6	64855.8	14252.7	12799.7
1797	14332.1	12893.5	64794.8	14280.8	12826.7
1798	14349.4	12955.4	64896.4	14248.3	12790.7
1799	14312.2	12974.6	64917.9	14312.6	12800.9
1800	14367.6	12907.2	64848.6	14318.3	12832.1
1801	14387.8	12990.9	64896.4	14241.6	12765.6
1802	14444.4	12955.2	64798.2	14221.7	12807.4
1803	14338.8	12864.1	64816	14308	12813.8
1804	14358.4	12910.1	64720.5	14238.1	12813.9
1805	14344	12948.7	64821.5	14228.6	12862.9
1806	14316.6	12993.1	64722.9	14212.8	12830.3
1807	14334	12936.8	64871.3	14210.2	12767.2
1808	14358.8	12926.1	64656.3	14254.1	12860.5
1809	14306.3	12991	64912.4	14263.2	12782
1810	14325.2	12919.5	64793.3	14253.3	12795.3
1811	14410.9	12911.8	64767.7	14322.3	12769.6
1812	14344.5	12920.4	64661.1	14266.2	12797.3
1813	14383.5	12928.5	64828.3	14278	12760
1814	14415.2	12842.3	64790.8	14225.3	12834
1815	14452.7	12862.8	64682.4	14163.9	12827.4
1816	14414.1	12919.8	64810.3	14275.9	12843.8
1817	14383.5	12964.5	64653.6	14343.4	12800.2
1818	14328.4	12916	64666.8	14290.6	12812.1
1819	14319.4	12960.7	64611.2	14269.6	12830.9
1820	14413.7	12979.9	64817.2	14329.5	12873.2
1821	14344.2	12937.3	64801.7	14232.3	12763.3
1822	14397.6	12961.1	64681	14258	12837.6
1823	14351.9	12915.8	64708.2	14210.2	12811.4
1824	14316.7	12914.9	64590.9	14192.3	12875.5
1825	14435.8	12965.3	64697	14258.2	12781.9
1826	14348.8	12842.7	64789.6	14255.4	12829.3
1827	14395.1	12916.9	64687.9	14233.2	12791
1828	14338.6	12947.4	64549.5	14271.9	12783
1829	14406.9	12969.1	64486.2	14265	12852.9
1830	14310.3	12962.2	64505.9	14293.3	12847.8
1831	14323	12938.9	64457.2	14297.4	12810.5
1832	14417.2	12915.1	64561.8	14270.9	12801.8
1833	14225.5	12912	64660.4	14293.1	12819.4
1834	14403	12923.4	64658.8	14212.6	12782.5
1835	14494.6	12917.7	64468.8	14241.4	12785.6
1836	14307.7	12863.3	64530.7	14275.6	12793.7
1837	14344.9	12909.9	64579.2	14271.7	12846.9
1838	14410.4	12933.8	64525.9	14228.2	12774.5
1839	14392.7	12856.8	64459.5	14321.5	12846.4
1840	14396.4	12887.4	64526.2	14234.5	12763.9
1841	14340.2	12882.1	64578.8	14241	12856
1842	14348.9	12883.8	64666.9	14310.6	12825
1843	14320.7	12889.5	64495.8	14251	12784.1
1844	14403.9	12934.3	64634	14321	12851.2
1845	14390.2	12946.5	64535.1	14256.8	12847.6
1846	14346.5	12964.7	64427.2	14308	12837.7
1847	14460.2	12884.2	64608.3	14201.7	12815.2
1848	14365.1	12876.8	64386.3	14298.5	12800.7
1849	14410	12920.1	64582.5	14312.3	12894.9
1850	14390	12932.6	64568.7	14227.8	12827.8
1851	14371.7	12904.2	64525.2	14201.2	12848.7
1852	14340.8	12954.6	64529.1	14261.7	12838.4
1853	14392.6	12898.5	64531.3	14219	12816.3
1854	14340	12834.7	64313.2	14275.2	12804.9
1855	14373.5	12888.7	64492	14314	12809.8
1856	14367.3	12914.2	64574.3	14284.8	12846.3
1857	14376.3	12987	64299.1	14265.4	12794.9
1858	14432.4	12934.5	64380.1	14288.8	12794.2
1859	14379.8	12920.2	64372.8	14145.5	12861
1860	14433.5	12855.6	64506.2	14255	12804.4
1861	14350.2	12897.5	64481.1	14287.6	12829.4
1862	14386.7	12873.2	64407.2	14263.9	12836.2
1863	14393.7	12929.9	64438.6	14235.2	12831.6
1864	14280.2	12875.3	64315.4	14276.1	12799.8
1865	14321.3	12894.4	64446.9	14302.4	12923.2
1866	14414	12846.2	64449.5	14265	12867
1867	14363.9	12888.3	64428.1	14272.5	12808.3
1868	14390.1	12933.1	64349.4	14228.7	12785.2
1869	14360.9	12868.9	64273.7	14200.4	12805.5
1870	14396.4	12858.9	64294.6	14271.4	12770.1
1871	14414.5	12934.2	64256.4	14254.4	12843
1872	14368.6	12883.2	64489.3	14261.3	12872.4
1873	14338.5	12932.4	64565.4	14276.3	12822.8
1874	14318.9	12927.3	64326.2	14271.5	12880
1875	14376.8	12912.3	64396.5	14292.2	12793.2
1876	14303.3	12909.2	64295.2	14251.2	12868
1877	14337.9	12870.5	64321.5	14218.9	12816
1878	14406.5	12903.3	64270.6	14149	12788.5
1879	14269.7	12953.9	64251	14182.2	12824.2
1880	14397.9	12908.4	64092.7	14204.8	12824
1881	14365.7	12785.4	64214.2	14199.6	12819.2
1882	14287.3	12916.8	64317.8	14249.9	12913.6
1883	14336.9	12910.1	64159.1	14257	12859.8
1884	14343.1	12991.2	64302.9	14286.5	12854.7
1885	14341.1	12919.8	64274.6	14222.7	12834.4
1886	14269.1	12885.1	64313.4	14272	12818.6
1887	14343.7	12882.9	64121.3	14308.9	12871
1888	14366.2	12885	64321.3	14268.6	12815.7
1889	14410.3	12951	64250.9	14270.9	12782.2
1890	14324	12878.9	64167.7	14308.8	12833
1891	14399	12862.3	64287.8	14275.4	12811.1
1892	14385	12833	64201.1	14271.1	12813.8
1893	14364.3	12884.2	64085.7	14299.8	12857.5
1894	14410.6	12885.5	64120.9	14246.1	12834.8
1895	14325.7	12844.7	64315.3	14232.6	12780.2
1896	14382.8	12865.7	64089.3	14274.3	12858
1897	14391.5	12959	64077.8	14217.8	12864.7
1898	14308.9	12894	64141.6	14243.3	12794.3
1899	14413.2	12952.2	64197.7	14251.7	12825.7
1900	14285.2	12872.3	64029.4	14322.1	12818.5
1901	14356.5	12853.3	64086	14231.3	12842.1
1902	14408.9	12937.3	64096.4	14266.3	12781.7
1903	14322.8	12890.9	64054.4	14266.3	12922.1
1904	14349.7	12910.7	64201.8	14194	12837.4
1905	14400.3	12825.1	64114.7	14242.2	12804.7
1906	14374.7	12842.3	64155.2	14233.5	12842.5
1907	14306	12936.2	64077.6	14308.5	12837
1908	14397.6	12887.9	64037.5	14247.6	12874.8
1909	14442.1	12913.3	64027.4	14228.3	12798.1
1910	14267.9	12862.6	63901.8	14340.1	12751.4
1911	14427.6	12931.7	64084.6	14294.7	12788.5
1912	14240.4	12928.4	64082.2	14235.9	12811.8
1913	14329.3	12943.6	64051.9	14203	12814
1914	14335.7	12884.9	63987.6	14266.1	12846.4
1915	14297.2	12916.6	63873.7	14231	12814.3
1916	14318.3	12917.6	64036.4	14244.4	12827.4
1917	14366.8	12880.5	64012.3	14268.6	12836.9
1918	14336.4	12942.9	64100.4	14237.3	12806.1
1919	14328	12892.3	63897.2	14170.4	12824.7
1920	14343.2	12889.1	64022.8	14252.9	12765.1
1921	14380.4	12832.4	63849.5	14240.7	12914.3
1922	14343.9	12863.3	63960.7	14311.6	12797
1923	14405.4	12928.9	63982.2	14231.5	12870.5
1924	14406.7	12876.9	64029.6	14312.4	12745.6
1925	14390.5	12893.9	63956.3	14323.7	12781.5
1926	14335.8	12942.8	63823.3	14274.6	12806.4
1927	14364.9	12933.4	63934.6	14358.9	12790.6
1928	14362.6	12861	63882.7	14287.4	12802.4
1929	14353.3	12872.1	63979.4	14342.8	12815.7
1930	14379.5	12846.3	63946.4	14221.5	12830.6
1931	14336.2	12924.5	63989.5	14184.6	12831
1932	14420.3	12895.9	63956.3	14292.2	12792
1933	14374.9	12917.3	63995.4	14269.5	12879.9
1934	14382.4	12958.6	63992.6	14321.9	12837.8
1935	14382.5	12867.3	63859.5	14218.5	12843.3
1936	14411.4	12821.6	64065.9	14166.1	12833.6
1937	14318.8	12916.7	63894.1	14245	12778.9
1938	14353.2	12831.2	63976	14239.1	12838.7
1939	14305.1	12953.4	63751.7	14160.1	12905
1940	14332.4	12860.3	63835.6	14204.2	12842.8
1941	14373.6	12906.6	64081.5	14200.1	12782.8
1942	14357.5	12885.7	63839.7	14237.1	12897.3
1943	14276.2	12838.5	63829.1	14279.8	12834.8
1944	14292.9	12893.3	63868.3	14263.4	12828.6
1945	14413.9	12854.9	63807.3	14200.2	12881.5
1946	14344.2	12920.7	63859.9	14314.6	12834.6
1947	14358.8	12869.8	63835.7	14237	12849
1948	14376.3	12952.6	63891.8	14244.3	12881
1949	14335.8	12960.2	63803.6	14263.9	12748.3
1950	14380.3	12974.2	63799	14237.8	12812.7
1951	14400.9	12941.1	63746.7	14287.1	12853.2
1952	14437.7	12911.2	63672.5	14211.5	12869.1
1953	14316.1	12896.3	63899	14286.6	12790
1954	14355.3	12919.5	63780.5	14186.2	12827.5
1955	14376.2	12804.7	63762.8	14287.4	12836.1
1956	14363.7	12942.4	63561.7	14217.9	12792.8
1957	14279.2	12896.4	63969.3	14232.8	12816.5
1958	14405.8	12905.6	63652.2	14282.6	12786.9
1959	14314.4	12903.8	63928.6	14266.7	12814.6
1960	14313.4	12868	63815.6	14179.3	12807.1
1961	14405.5	12973	63844.9	14157.5	12830.6
1962	14388	12924.3	63801	14187	12873.6
1963	14426.2	12941.4	63904.8	14230.9	12849.5
1964	14367.8	12872	63730.3	14219.9	12861.1
1965	14354.1	12915.6	63753.9	14264.5	12767.9
1966	14327.3	12907.7	63707.7	14219.4	12876.6
1967	14364.1	12964.4	63594.5	14188.1	12835.7
1968	14405.7	12897.3	63638.1	14156.3	12894.9
1969	14316.4	12887.4	63813.5	14298.7	12848.9
1970	14359.3	12911	63745.7	14237.5	12832.9
1971	14314.6	12810.9	63797	14154.1	12770.7
1972	14331.3	12843.9	63750.2	14269.7	12920.2
1973	14371.1	12846	63787.2	14261.1	12882
1974	14437.8	12873.1	63588.1	14258.3	12826.8
1975	14356	12917.7	63559.3	14259.5	12819.1
1976	14331.6	12851.8	63581.1	14303.4	12777.8
1977	14351.1	12900.4	63584.7	14260.7	12840.3
1978	14422.3	12976.6	63675.5	14287.2	12861
1979	14295	12851.3	63536.3	14286.2	12835.7
1980	14368.9	12917	63720.1	14342.9	12874.1
1981	14392	12874.6	63606.6	14177.1	12834.8
1982	14411.6	12882	63555.6	14250.6	12833.5
1983	14401.1	12835.3	63657.7	14240.8	12892.4
1984	14426.4	12932.7	63690	14233.5	12851.5
1985	14292.5	12920.8	63638.6	14157.3	12820.3
1986	14396	12895.5	63703.7	14193.8	12892
1987	14389.4	12842	63571.2	14209.6	12822.6
1988	14322.6	12904.8	63533.4	14221	12847.1
1989	14347.7	12924.8	63592.7	14196.7	12790.7
1990	14389.8	12847.7	63567.7	14271.5	12899.4
1991	14347.5	12916.6	63646.5	14191.3	12877.5
1992	14327.5	12941	63651.7	14202.6	12817.1
1993	14378.4	12904.5	63513.4	14205.7	12843.1
1994	14417.6	12878.7	63592.1	14274.9	12738.9
1995	14425.1	12937.8	63611.3	14198	12750.4
1996	14351.2	12876.1	63536.3	14261.2	12804.1
1997	14333.7	12911.8	63461.4	14212.3	12892.5
1998	14433.8	12810.5	63601	14230	12779
[truncated: 2,203 more rows]
