# Supplementary material for: Daptomycin forms a stable complex with phosphatidylglycerol for selective uptake to bacterial membrane
Source: eLife. 2025 Jun 2;13:RP93267. doi: 10.7554/eLife.93267 (PMC12129450; doi:10.7554/eLife.93267)
Supplement: Figure 3—source data 2. [file elife-93267-fig3-data2.xlsx]

## Sheet: Sheet1
CD spectra									720uM:180uM::Dapt:DMPG			(720uM:180uM::DMPG:Dapt)+12.86mM EGTA			720uM:180uM::Dapt:Card			(720uM:180uM::Card:Dapt)+12.86mM EGTA							Dapt+ca+15mMg3p
Wavelength(nm)	buffer	Dap	Dap-Ca2+	180uM:180uM::Dapt:DMPC	360uM:180uM::Dapt:DMPC	720uM:180uM::Dapt:DMPC	180uM:180uM::Dapt:DMPG	360uM:180uM::Dapt:DMPG	Dap-Ca2+ + DMPG	(180uM:180uM::DMPG:Dapt)+12.86mM EGTA	(360uM:180uM::DMPG:Dapt)+12.86mM EGTA	Dap-Ca2+ +DMPG//EGTA	180uM:180uM::Dapt:Card	360uM:180uM::Dapt:Card	Dap-Ca2+ + CL	(180uM:180uM::Card:Dapt)+12.86mM EGTA	(360uM:180uM::Card:Dapt)+12.86mM EGTA	Dap-Ca2+ +CL//EGTA	180uM:180uM::Dapt:POPS	360uM:180uM::Dapt:POPS	720uM:180uM::Dapt:POPS	(180uM:180uM::POPS:Dapt)+12.86mM EGTA	(360uM:180uM::POPS:Dapt)+12.86mM EGTA	(720uM:180uM::POPS:Dapt)+12.86mM EGTA	Dap+G3P
270	0.304123	0.202935	0.218038	1.98917	1.24697	0.0624714	1.488	2.46338	2.61024	1.93828	1.32582	0.985372	1.77325	1.03401	0.905397	1.5586	1.21161	0.486886	1.86127	1.47745	0.982576	1.58983	1.34916	0.869357	0.158936
269	-0.00438261	0.359329	0.255865	1.60976	0.868024	-0.367051	1.3824	2.45127	2.51041	2.21764	1.54595	1.25918	1.56563	0.939224	0.79105	1.73277	1.27856	0.696869	1.68287	1.32531	0.818918	1.67312	1.51563	0.943299	0.321763
268	-0.165632	0.174359	0.10398	1.71182	0.898876	-0.179196	1.56559	2.76928	2.94993	2.28788	1.74978	1.20548	1.7296	1.01641	1.03877	1.72757	1.40449	0.61669	1.76761	1.47028	0.964426	1.83296	1.49754	0.968692	0.32619
267	-0.145137	0.723312	0.699039	1.80039	0.919234	-0.21954	1.84484	3.22225	3.34884	2.68362	2.10789	1.83238	1.93519	1.26993	1.34511	2.09945	1.72947	0.951796	1.89495	1.79181	1.22785	2.00281	1.8381	1.1881	0.4209
266	0.0688923	0.405041	0.336774	2.04243	1.19029	-0.0202923	2.27524	3.77239	3.97005	2.29808	1.8857	1.40743	2.22169	1.70556	1.91094	1.64804	1.2248	0.544189	2.31897	2.15494	1.72932	1.59529	1.30388	0.769911	-0.0196779
265	-0.173574	0.686055	0.625504	1.76467	0.86283	-0.289149	2.29321	3.87863	4.03427	2.77906	2.10166	1.87707	2.03555	1.75386	1.86826	1.98737	1.57067	0.803097	2.12424	1.93637	1.71947	1.78211	1.73529	1.02144	0.555334
264	-0.0327424	0.742827	0.64409	1.92319	1.15205	0.0183611	2.67238	4.1866	4.35017	2.84125	2.36562	2.07616	2.1974	2.03709	2.10709	2.09947	1.39963	0.849137	2.43251	2.07513	1.84263	1.99985	1.65929	1.16235	0.422968
263	-0.0213756	0.415362	0.324121	1.96724	1.13636	0.00215397	2.77277	4.28383	4.49694	2.81168	2.3293	1.98572	2.53169	2.20159	2.30002	1.90608	1.5903	0.719967	2.46399	2.2348	1.92029	1.92749	1.5666	1.0166	0.615024
262	0.156917	0.767351	0.571501	2.35758	1.51596	0.337221	3.26612	4.62889	4.82219	2.98802	2.41371	2.12387	2.89118	2.48266	2.7943	2.0402	1.64576	0.913976	2.7461	2.63092	2.26938	2.08996	1.96512	1.18604	0.481587
261	-0.12801	0.549274	0.454366	2.0069	1.27588	0.154188	3.00352	4.36153	4.50674	3.09202	2.67548	2.18485	2.42087	2.25259	2.25211	2.20108	1.7322	1.18387	2.42705	2.18178	2.00695	2.12949	1.92526	1.30419	0.615694
260	0.190353	0.391422	0.437423	2.37278	1.61852	0.21414	3.25013	4.75527	4.78542	3.09066	2.64209	2.27402	2.75039	2.42788	2.51996	2.16785	1.70988	1.06655	2.63925	2.41191	2.17535	2.25263	1.94854	1.22257	0.427943
259	0.13799	0.643634	0.663124	2.28383	1.38974	0.150729	3.31766	4.73516	4.95243	3.1811	2.60854	2.32464	2.70238	2.19893	2.50598	2.23979	1.86915	1.1323	2.58151	2.42161	1.95301	2.37701	2.09339	1.2593	0.721107
258	0.121574	0.862707	0.701306	2.36825	1.49469	0.262938	3.42519	4.64799	4.82505	3.65083	3.14222	2.63705	2.732	2.37855	2.50973	2.65272	2.20412	1.53793	2.57907	2.31533	2.02657	2.57245	2.37585	1.81377	0.611111
257	0.261271	0.862975	0.823675	2.44289	1.60781	0.418873	3.46792	4.78819	4.91865	3.03762	2.48153	2.03051	2.89481	2.43285	2.51756	2.18906	1.75342	0.973054	2.70166	2.39796	2.01689	2.1295	1.8246	1.23039	0.469501
256	-0.266803	0.936871	0.832135	1.9847	1.26312	-0.138853	2.8685	4.12132	4.27572	3.4566	2.86076	2.28825	2.43231	1.86609	1.80875	2.4669	2.0801	1.31795	2.19036	1.83252	1.54829	2.51709	2.19539	1.52176	0.701098
255	-0.199485	0.929935	0.912898	2.10799	1.2357	-0.014576	2.91074	3.97457	4.2694	3.26815	2.62464	2.09093	2.30107	1.8732	1.81936	2.42052	1.81965	1.09999	2.24665	1.99969	1.47217	2.36528	2.04589	1.34656	0.714252
254	0.0588364	0.621324	0.519076	2.19596	1.41038	0.199308	2.97307	4.18821	4.28214	3.53693	2.70196	2.35588	2.56257	1.73522	1.85907	2.66362	2.02055	1.2856	2.49775	2.07019	1.76209	2.61029	2.31752	1.52025	0.704417
253	-0.413825	0.708767	0.741245	2.01952	1.09671	-0.146773	2.45097	3.53573	3.75991	3.53635	2.77007	2.25928	2.23084	1.34078	1.29123	2.67609	1.99804	1.26828	2.12689	1.60877	1.21465	2.64924	2.34866	1.62091	0.638503
252	-0.0505989	0.862279	0.761413	2.47991	1.59427	0.0769961	2.73433	3.77254	3.91896	3.81593	2.96751	2.67945	2.58208	1.56837	1.29732	3.01944	2.52492	1.67953	2.47506	1.92897	1.60805	3.06359	2.7613	2.0126	0.570098
251	0.276908	0.691325	0.596027	2.55753	1.63561	0.345239	2.92488	3.9808	4.0642	3.48047	2.84083	2.03156	2.54218	1.75074	1.53398	2.72931	2.3413	1.44263	2.64479	2.24588	1.78001	2.79523	2.41603	1.61069	0.527124
250	0.213639	0.902543	0.848941	2.83109	1.63083	0.585967	2.83298	3.8809	4.02585	3.25577	2.48141	1.9533	2.73595	1.62446	1.46994	2.52739	2.02051	1.19122	2.62509	2.15386	1.59751	2.54898	2.2583	1.51552	0.850217
249	0.0704746	0.866113	0.787498	2.61796	1.69381	0.43034	2.61399	3.56384	3.81356	3.83754	2.92383	2.52397	2.60792	1.51319	1.04091	3.2447	2.58051	1.59857	2.44626	1.98141	1.53195	3.19046	2.8891	2.13722	0.819753
248	0.0134582	0.828721	0.817658	2.55016	1.72868	0.363999	2.62011	3.55263	3.75137	3.60959	2.88117	2.20571	2.65547	1.33678	0.979852	3.25283	2.44305	1.57302	2.41849	1.93677	1.48218	3.12443	2.72544	1.79354	0.768651
247	0.150984	0.806509	0.729979	2.80475	1.8027	0.473087	2.95003	3.68305	4.02383	3.52178	2.73858	2.14499	2.66929	1.17314	1.04015	3.06691	2.28537	1.55994	2.59354	2.09097	1.46922	2.90921	2.71619	1.72984	0.981862
246	0.095427	1.09127	1.06106	2.69413	1.86354	0.526962	2.94674	3.96049	4.16135	3.97385	2.99961	2.50597	2.70585	1.16052	0.821191	3.40504	2.95533	1.70703	2.47556	1.93323	1.52359	3.28331	3.01127	2.0375	0.892056
245	-0.0711368	1.19907	1.04898	2.87414	1.77986	0.434296	2.90659	4.04585	4.16288	3.64883	2.74197	2.09639	2.70546	1.03458	0.496523	2.93647	2.31588	1.22707	2.56123	1.81693	1.38868	2.84588	2.55619	1.6381	1.07006
244	0.0561246	1.19139	1.11048	3.41076	2.26184	0.84398	3.25942	4.33796	4.60959	4.38064	3.35082	2.72923	2.8084	1.00643	0.35456	3.69375	2.89711	2.09041	2.79182	2.05572	1.61749	3.70701	3.32416	2.38807	1.03564
243	-0.104087	0.976721	0.917311	3.32511	2.36234	0.902632	3.24204	4.33253	4.41943	4.24174	3.17873	2.54962	2.49483	0.471029	-0.444697	3.65832	2.9932	1.91757	2.69172	1.96679	1.50787	3.63597	3.25084	2.42229	1.5641
242	-0.0505662	1.83078	1.75913	3.65049	2.45616	1.07941	2.97676	3.8768	4.11357	4.57316	3.40458	2.98175	2.433	-0.243578	-1.40905	4.20538	3.45244	2.8869	2.82258	1.83795	1.45319	4.31818	4.09331	3.00595	1.72766
241	0.199424	2.11239	2.04275	4.11197	3.14323	1.25447	2.54701	3.18423	3.24475	4.30588	3.01776	2.43622	2.39842	-0.878508	-2.54943	4.17957	3.6303	2.56416	2.92601	2.12587	1.54393	4.24062	3.95098	2.97224	2.17749
240	-0.226065	2.65709	2.49365	4.10574	3.18197	1.58416	1.03792	0.769224	0.803109	4.15517	2.69181	1.92986	1.64967	-2.5117	-5.15166	4.9334	4.1653	3.28672	2.86207	1.57046	1.17248	4.97914	4.73325	3.74448	2.40048
239	-0.228748	3.18388	3.20455	4.65528	3.45675	1.9373	-0.739994	-2.11249	-2.56979	3.18704	1.46419	0.66618	1.31483	-4.58449	-8.16539	5.26002	4.4613	3.50039	2.86456	1.71986	0.977511	5.266	4.87453	3.89385	3.07713
238	0.181185	3.78852	3.47201	5.51948	4.37898	2.70888	-2.514	-5.41711	-6.17902	3.12566	0.932081	-0.148077	0.914091	-5.92269	-10.8192	6.35907	5.50112	4.4316	3.56933	1.94171	1.22568	6.39648	6.06687	5.1093	3.6239
237	-0.0864203	4.77125	4.59058	5.69888	4.90994	3.21622	-5.62426	-9.89187	-11.2551	2.23073	-0.499233	-1.42518	0.0156033	-8.58768	-15.2503	7.20843	6.14823	5.29339	3.461	1.81246	0.871321	7.1634	6.84497	5.80034	4.35661
236	0.0711371	4.91294	4.70415	6.70723	5.52625	4.06307	-7.76759	-13.7187	-15.8479	1.24205	-2.01361	-2.99503	-0.285215	-10.7754	-18.651	7.25559	6.78073	5.23707	4.1361	2.16386	1.00971	7.63174	7.06022	6.02512	5.12267
235	-0.0332702	6.08568	5.91114	7.61057	6.24719	4.83691	-9.99471	-17.3464	-20.4419	0.894336	-2.83096	-3.98978	-0.819752	-12.365	-21.7232	8.56632	7.97039	6.89	4.19868	2.33188	0.950403	8.46359	8.29278	7.38976	5.6369
234	-0.377157	7.22944	6.87388	8.1888	6.76114	5.4527	-11.9544	-20.5345	-24.6105	0.460331	-3.13714	-4.78429	-1.00901	-13.6448	-23.8718	9.52521	8.62283	7.25024	4.69686	2.48049	1.17605	9.67163	9.31641	8.0509	6.65962
233	0.101941	8.3717	7.94833	9.54308	8.25812	6.45407	-12.2034	-21.6152	-27.0281	0.593244	-3.25989	-4.72417	-0.242648	-13.4756	-24.4812	10.3676	9.39075	8.29559	5.84028	4.01607	1.75379	10.6263	10.2549	9.09777	7.50111
232	0.00756998	9.36655	8.92346	10.2415	8.90471	7.11072	-12.1542	-22.0574	-28.8967	1.04934	-2.77118	-4.3355	0.377438	-12.8953	-24.3333	11.4359	10.3563	9.6009	6.55974	4.32319	2.49576	11.6147	11.4375	10.251	8.24534
231	-0.217243	9.71611	9.34507	10.7907	9.48128	7.30049	-11.3385	-21.5879	-28.4992	1.64477	-1.89142	-3.62395	0.917179	-11.5948	-22.6187	11.8245	10.5432	9.50296	7.29891	5.15992	3.16197	11.7271	11.8903	10.4981	8.96262
230	-0.0994929	9.34503	9.25874	10.7229	9.48962	7.31476	-9.17302	-18.9393	-26.1622	2.80098	-0.482023	-1.81291	2.33953	-9.64092	-18.6825	12.3728	11.4086	10.2813	7.70845	5.51962	3.38522	12.3426	12.2304	10.9848	8.61158
229	0.404613	9.09379	8.78766	10.692	9.43701	7.32306	-5.82118	-15.2045	-21.6788	3.75714	1.06253	-0.18126	3.74661	-5.92208	-14.8534	11.72	10.6941	9.64255	7.88811	6.30754	4.38666	11.7049	11.5032	10.3022	8.1832
228	0.0414389	7.76176	7.74239	9.24403	8.15322	6.20742	-3.09786	-10.8372	-17.1902	5.36127	2.79437	1.46508	4.25654	-3.31704	-9.82379	10.8213	9.52454	8.8721	7.21324	5.19489	3.81981	10.9247	10.8572	9.51504	7.45921
227	-0.0621237	5.98793	5.57007	7.47359	6.34233	4.32356	0.47717	-6.0219	-11.0442	5.71903	4.08209	2.76653	5.29457	0.23143	-4.35257	8.74563	7.30656	6.42307	6.50247	4.37219	3.22767	8.9078	8.4196	7.1623	5.54149
226	-0.0534784	3.30623	3.53767	6.19244	4.72965	3.05639	3.84436	-0.927947	-5.07617	6.97945	5.16166	4.34943	5.79151	3.32177	1.27919	7.1917	5.93805	4.64586	4.4874	3.4359	2.8516	7.00741	6.55971	5.29055	3.4442
225	-0.169468	1.16254	1.17233	3.40378	2.4171	0.710348	7.10592	3.47829	0.563221	7.04039	6.5953	5.54628	6.09354	6.23593	5.65071	4.49069	3.55549	2.62782	3.37939	1.7988	1.96488	4.93703	4.36178	3.25356	1.2668
224	0.471933	-0.788339	-0.481325	2.81486	1.48757	-0.0140823	10.627	8.3949	6.55763	8.15675	7.56741	7.27549	7.29642	9.78128	11.409	2.90451	1.23053	0.849897	2.41391	1.71732	1.79622	2.79143	2.19376	0.990164	-0.741434
223	0.0605201	-3.29777	-2.93528	0.611311	-0.920354	-2.56717	12.0972	11.4488	10.5752	7.82606	7.80453	7.35322	6.75995	11.7674	15.2373	0.774727	-0.357027	-1.49894	1.24566	0.0500024	0.379358	0.90743	0.587771	-0.607005	-3.11083
222	-0.271364	-4.7631	-4.46041	-1.23116	-2.68132	-4.32677	13.0224	14.0136	13.6041	7.35633	8.12252	7.36349	6.51109	13.0116	17.1259	-0.978313	-2.34392	-3.14301	-0.635556	-1.53744	-0.491717	-1.03619	-1.60075	-2.64797	-5.32305
221	0.266894	-6.24887	-6.06328	-2.45519	-2.79852	-4.26134	14.439	16.5887	16.6052	7.54923	8.01321	7.7251	6.65786	14.3303	20.0218	-2.62742	-3.75745	-4.40849	-0.949663	-1.61467	-0.489455	-2.36068	-3.2185	-4.4503	-6.02257
220	-0.132149	-7.76339	-7.20025	-3.64673	-3.90817	-5.14617	14.5192	17.4509	18.4059	7.35106	7.63745	7.40505	6.40587	14.4454	20.776	-3.26887	-4.35825	-5.59783	-2.10282	-2.75162	-1.47482	-3.301	-3.70352	-4.44574	-6.98086
219	-0.0670734	-7.64278	-7.57837	-3.63399	-4.43507	-5.63431	14.6742	18.2714	18.8781	7.12499	7.36759	6.79379	6.57594	15.2615	21.4043	-3.94112	-4.59913	-5.35873	-2.56628	-2.69567	-1.28209	-3.24271	-4.4724	-5.4768	-7.36186
218	-0.192241	-8.06236	-7.36474	-3.70646	-4.77911	-5.83837	13.7482	18.1094	19.3423	6.44716	6.41308	6.61138	6.19986	14.7219	21.8024	-3.78793	-4.99033	-6.35997	-2.52109	-2.81149	-1.94512	-3.91746	-4.41738	-5.90339	-7.77437
217	0.432843	-8.88758	-8.01317	-2.90327	-4.04929	-5.58909	13.7164	18.5567	20.1237	6.02673	6.50849	6.04983	7.1258	15.6881	22.0274	-4.76148	-5.76099	-5.48962	-1.98274	-2.25027	-0.636213	-3.7413	-5.20197	-5.47256	-8.03644
216	0.0893202	-7.87176	-7.58011	-3.06248	-4.34828	-5.40031	12.3979	18.0343	19.4551	6.54659	6.49341	5.58992	6.62344	15.5208	22.7643	-3.85537	-4.58336	-5.73546	-1.82249	-2.26078	-1.08059	-2.80447	-4.16261	-5.24281	-7.7468
215	-0.93092	-7.77154	-7.27166	-3.96484	-4.64283	-5.95885	11.4225	17.1999	18.3036	6.00591	5.89169	4.83121	5.96697	14.337	21.3634	-4.22912	-5.32283	-6.1269	-2.43267	-3.05931	-1.8329	-3.42562	-4.64635	-5.87871	-7.4258
214	0.559885	-7.59504	-6.88768	-2.51809	-3.30158	-3.93684	11.7916	17.888	19.735	5.67687	5.56088	4.92995	7.18911	15.8381	22.8985	-3.40135	-4.46019	-5.54769	-0.471523	-1.44846	-0.124688	-2.7437	-3.93466	-5.43765	-7.0917
213	-0.219521	-7.69328	-6.94075	-2.6078	-3.27364	-4.77917	10.845	17.0376	19.4286	6.1203	5.82649	4.59961	6.96845	15.3563	22.584	-3.05597	-4.09998	-3.74698	-1.13105	-1.68374	-0.605064	-2.38446	-3.69617	-4.86794	-6.99583
212	0.184504	-6.60314	-6.09205	-1.949	-2.61099	-4.19558	10.7715	17.3325	19.416	6.30907	5.644	4.93355	7.15021	15.7075	23.0069	-2.21293	-4.46537	-4.40871	-0.78578	-1.17226	-0.0166355	-1.74055	-3.62325	-3.96808	-7.24957
211	0.142074	-6.82385	-6.09586	-2.25781	-3.0439	-3.62788	10.7155	17.2509	19.8082	6.05917	5.3663	4.54421	7.49839	15.7559	23.2847	-2.93678	-4.15791	-2.68104	-0.310928	-0.654236	0.392185	-1.60406	-3.52038	-4.42635	-7.20955
210	0.450582	-6.12304	-5.73866	-1.71241	-2.4076	-3.47745	9.70063	16.7713	19.9975	6.39092	5.4583	4.39717	7.30791	16.2421	25.4632	-2.19914	-3.58899	-2.54733	-0.375954	-0.630024	0.102375	-1.69358	-2.80175	-4.05689	-7.55102
209	-0.212901	-7.30927	-6.79389	-2.24052	-3.64448	-4.48959	8.61957	15.4558	19.3697	5.73813	4.55533	3.86735	6.63559	14.9079	22.1347	-2.75468	-3.74074	-2.73241	-1.07145	-1.88325	-0.228038	-1.69991	-3.29731	-3.48641	-7.14238
208	0.0937556	-7.10044	-6.82233	-2.00262	-3.11603	-4.01884	8.43527	16.1466	19.4618	5.23445	4.22937	3.57372	6.57469	14.962	23.1535	-2.59915	-3.58651	-2.3174	-0.220462	-1.10447	-0.101639	-2.36014	-3.58034	-4.07939	-8.24178
207	0.194477	-6.87153	-6.36735	-2.14078	-2.90459	-3.98633	7.29059	15.0003	20.0867	4.7132	2.65903	2.52813	6.04319	14.2523	18.1091	-3.04499	-3.60229	-3.92978	-0.567278	-1.82507	-0.547406	-2.04635	-4.1346	-5.34457	-7.24419
206	-0.104393	-7.59234	-6.98567	-2.54314	-3.96352	-4.78741	5.17305	14.3907	18.8415	4.08377	2.07032	1.95765	4.94163	12.2171	17.8535	-3.44745	-5.1845	-6.16418	-1.4193	-3.19312	-0.936873	-3.11668	-4.32402	-4.8955	-7.99821
205	-0.353174	-8.19865	-7.56985	-3.79351	-4.68087	-5.39188	3.88177	13.4002	18.2842	3.37779	2.49346	1.83926	2.93487	10.012	14.6101	-4.12952	-4.16121	2.76327	-2.65718	-3.38345	-2.71171	-3.23548	-3.95972	-4.73222	-8.67428
204	0.321776	-7.73651	-7.50742	-3.5722	-4.90295	-5.46532	2.73208	12.2161	17.7637	3.18859	-0.0679874	1.29679	2.38233	8.93274	11.2573	-3.94619	-6.05237	-9.43151	-2.16892	-3.2326	-1.466	-3.40175	-4.41244	-6.59544	-9.26515
203	-0.105	-9.24554	-8.80396	-5.18097	-5.13571	-6.42162	0.787737	11.2828	17.5855	1.9874	0.725761	-0.243065	1.55999	6.42845	7.38465	-7.02648	-5.24762	-17.4808	-3.33766	-4.03094	-3.04309	-4.45161	-5.91667	-5.12964	-9.89899
202	-0.0464702	-9.24887	-8.93008	-4.94366	-5.06658	-6.60073	-0.0726689	10.9185	17.4956	-0.275497	-0.705984	-2.0095	-0.0107869	3.24579	6.58939	-6.08409	-1.2006	13.4974	-3.11304	-3.62894	-2.53655	-4.41897	-6.46323	-7.5764	-8.12673
201	-0.0630089	-9.70732	-9.2522	-5.55943	-4.62237	-7.53139	-1.57875	10.1184	16.2343	1.09601	0.0429587	-2.06451	-1.42117	3.70754	8.31399	-3.62013	-4.25162	12.6635	-2.28788	-3.94383	-1.90071	-4.6963	-5.92261	-7.65727	-11.4719
200	-0.24695	-9.30227	-9.62677	-5.56244	-5.22893	-6.94978	-2.23719	9.82314	17.0994	0.278238	-3.09597	-4.40714	-0.859647	-0.130924	3.10935	-3.25414	-2.83999	-17.6397	-1.44394	-2.79683	-1.21232	-4.96116	-6.13585	-4.4584	-11.3188
199	-0.0196329	-9.45815	-7.59095	-3.91841	-4.80718	-7.00918	-2.12124	9.94643	15.7269	-2.17183	-0.776844	-1.62462	-2.67585	-6.26763	-0.123023	-2.19288	5.19249	13.3547	-0.432302	-1.33504	1.20501	-4.18706	-6.56854	-5.31147	-7.69214
198	0.228458	-7.90619	-8.69273	-3.31296	-5.80142	-5.97141	-1.69684	10.5834	17.0613	-0.315268	-4.3593	-3.24937	-1.44886	-2.69206	15.7052	-0.531753	-7.78742	23.6213	0.491904	0.826643	0.739853	-5.421	-2.99524	-1.96345	-7.89006
197	-0.522635	-6.17365	-7.6572	-3.51345	-3.96271	-4.50379	-3.28268	8.91358	16.268	-1.46266	-2.61377	-2.52015	-0.947414	-9.88509	-0.0704297	16.0002	17.3556	76.4069	-0.507307	3.22426	3.95886	-2.9956	2.82943	-5.16576	-5.23285
196	-0.216424	-6.73325	-7.06624	-0.699076	-4.60034	-6.51003	-1.45772	9.68323	16.5935	-0.685108	-1.96947	-1.42144	-1.60922	2.73746	19.4687	3.27875	37.4016	37.6703	2.93487	7.2099	10.3624	4.12869	9.09145	4.53835	-5.52293
195	-0.522765	-4.25893	-5.84129	-0.35756	-1.13292	-3.94395	-0.753426	9.43642	14.5735	1.34966	0.509292	-1.20541	-6.49953	-4.51555	14.3025	6.87422	31.9691	24.5993	6.55134	8.47906	4.77807	6.35103	2.78186	13.8493	-1.87598
194	-0.622636	-2.55321	0.00863184	1.51731	-1.91439	0.396158	1.27032	8.54891	14.5717	19.6111	11.784	3.27584	-0.648371	1.51751	9.13389	22.6564	20.6007	90.1123	6.39981	13.7745	10.4194	11.0588	20.3212	38.7214	-2.79558
193	0.0483999	-2.74863	0.654109	4.07642	-0.00224707	0.964867	-0.83152	8.11662	13.2619	39.3483	-3.02015	-5.40968	5.1202	-10.0901	-5.59783	100.363	31.6634	17.0693	8.00615	13.2456	13.9801	38.8504	4.73165	31.804	-0.537334
192	-0.188882	-0.138994	-0.462408	13.7577	4.32006	2.07425	3.84371	12.1983	14.9994	22.1782	3.49453	19.3469	-4.26951	5.89258	19.9314	20.5657	80.5599	23.3406	12.2309	11.1586	17.6167	53.4046	13.6685	118.965	7.79054
191	3.83277	6.52223	-2.70627	16.468	11.9342	0.988193	7.51377	11.422	23.3463	35.3375	8.56026	20.2541	-3.16625	15.0822	16.0488	-15.0471	36.6172	-21.7158	18.1806	13.6678	52.325	84.8744	79.916	92.9049	7.17111
190	3.85595	2.45874	12.6997	17.8612	26.2921	24.3174	18.585	10.9123	22.9028	47.0071	33.7686	31.4127	28.1039	27.6613	16.3169	110.959	37.7134	80.0006	22.7364	33.5201	35.1724	51.9111	115.779	25.8108	0.382975
189	0.398331	29.1718	30.4068	16.2321	45.5235	28.5683	31.7446	8.0385	16.9127	23.124	65.916	32.1664	-3.28878	16.602	22.732	47.9923	100.266	-27.8254	3.0595	-2.22045	25.4867	123.095	23.498	77.9594	17.6432
188	-1.03707	29.9093	-5.86162	41.051	47.147	-14.941	13.9848	20.4193	28.4984	24.0233	42.4665	-2.42079	1.80513	6.13716	21.5469	111.547	43.3573	99.3182	38.2559	57.4572	34.3649	6.71643	92.9142	81.7798	30.4096
187	-39.7734	86.9732	9.0469	-23.6043	7.16906	-23.4863	-18.7559	-20.816	-19.8198	36.1976	52.0929	0.383428	-32.3897	-40.7073	-29.6979	77.457	62.6189	68.4206	5.38306	-16.1791	-5.00256	62.2276	68.3611	-85.4328	5.89575
186	43.1152	-17.0999	-25.3025	68.0631	72.2747	109.43	62.9673	61.4313	58.7469	75.331	67.3772	52.019	60.4295	25.403	50.2984	81.7372	73.2339	94.1646	62.8862	62.9789	60.3343	49.4843	-26.2349	-37.5802	16.9221
185	-109.871	86.608	51.7364	-96.4495	-107.587	-29.7027	-56.9856	-50.1475	-55.7495	26.2936	7.43052	6.86574	-93.1829	-92.0111	-90.3893	14.506	99.1874	120.004	-62.8601	-29.6264	-24.8768	88.7814	52.7033	-17.7548	71.2387
184	-32.3062	13.9609	49.2845	-26.3788	-14.5927	33.7499	-32.0827	-29.9401	-33.252	68.7743	144.658	132.977	-54.9356	-23.3773	-32.3877	118.568	73.5073	151.48	-34.1258	-31.386	-22.4257	101.879	248.461	102.946	54.4226
183	-16.1552	-40.7803	-16.2074	-22.65	5.69248	-46.6451	-15.525	-67.7132	-16.5075	-17.0588	38.012	14.3517	-69.4102	-79.8421	-43.3603	10.5832	5.13922	88.4871	-22.4741	-54.8185	-38.3928	50.7869	-79.731	119.302	112.008
182	52.9245	143.698	156.612	83.2776	105.78	158.072	125.701	117.146	81.2021	258.916	219.305	226.175	38.803	54.5477	56.1261	140.225	284.92	266.451	78.6284	43.9971	75.6565	252.177	232.12	350.726	174.687
181	-16.6703	20.0255	110.222	15.7738	126.893	-54.7124	34.942	-2.97553	-29.3841	51.5983	30.1562	-15.2911	-15.7428	1.12184	-62.6061	-69.9807	-17.2222	-32.8282	-13.9637	8.17615	37.8646	-5.10303	-41.8888	2.35249	108.032
180	37.5955	-7.77959	9.63864	197.353	57.6562	185.335	119.852	10.4695	122.296	-61.2395	-1.75121	-3.64004	57.3275	85.0923	83.1554	-147	96.1074	-2.29045	28.2386	87.279	80.9562	23.5122	-60.1025	150.672	247.047
