# Supplementary material for: Daptomycin forms a stable complex with phosphatidylglycerol for selective uptake to bacterial membrane
Source: eLife. 2025 Jun 2;13:RP93267. doi: 10.7554/eLife.93267 (PMC12129450; doi:10.7554/eLife.93267)
Supplement: Figure 4—figure supplement 1—source data 1. [file elife-93267-fig4-figsupp1-data1.xlsx]

## Sheet: Multi Scans EM
Multi Scans EM
Labels	1 EM	2 EM	3 EM	4 EM	5 EM	6 EM	7 EM	8 EM	9 EM	10 EM	11 EM	12 EM	13 EM	14 EM	15 EM	16 EM
Type	Emission Scan	Emission Scan	Emission Scan	Emission Scan	Emission Scan	Emission Scan	Emission Scan	Emission Scan	Emission Scan	Emission Scan	Emission Scan	Emission Scan	Emission Scan	Emission Scan	Emission Scan	Emission Scan
Comment
Start	340	340	340	340	340	340	340	340	340	340	340	340	340	340	340	340
Stop	600	600	600	600	600	600	600	600	600	600	600	600	600	600	600	600
Step	1	1	1	1	1	1	1	1	1	1	1	1	1	1	1	1
Fixed/Offset	330	330	330	330	330	330	330	330	330	330	330	330	330	330	330	330
Xaxis	Wavelength	Wavelength	Wavelength	Wavelength	Wavelength	Wavelength	Wavelength	Wavelength	Wavelength	Wavelength	Wavelength	Wavelength	Wavelength	Wavelength	Wavelength	Wavelength
Yaxis	Counts	Counts	Counts	Counts	Counts	Counts	Counts	Counts	Counts	Counts	Counts	Counts	Counts	Counts	Counts	Counts
Scan Corr. by File	TRUE	TRUE	TRUE	TRUE	TRUE	TRUE	TRUE	TRUE	TRUE	TRUE	TRUE	TRUE	TRUE	TRUE	TRUE	TRUE
Corr. by Ref. Det.	TRUE	TRUE	TRUE	TRUE	TRUE	TRUE	TRUE	TRUE	TRUE	TRUE	TRUE	TRUE	TRUE	TRUE	TRUE	TRUE
Fixed/Offset Corr. by File	FALSE	FALSE	FALSE	FALSE	FALSE	FALSE	FALSE	FALSE	FALSE	FALSE	FALSE	FALSE	FALSE	FALSE	FALSE	FALSE
Repeats	1	1	1	1	1	1	1	1	1	1	1	1	1	1	1	1
Dwell Time	0.1	0.1	0.1	0.1	0.1	0.1	0.1	0.1	0.1	0.1	0.1	0.1	0.1	0.1	0.1	0.1
Lamp	Xenon	Xenon	Xenon	Xenon	Xenon	Xenon	Xenon	Xenon	Xenon	Xenon	Xenon	Xenon	Xenon	Xenon	Xenon	Xenon
Temp	0	0	0	0	0	0	0	0	0	0	0	0	0	0	0	0
Scan Polariser	None	None	None	None	None	None	None	None	None	None	None	None	None	None	None	None
Scan Slit	3.00015	3.00015	3.00015	3.00015	3.00015	3.00015	3.00015	3.00015	3.00015	3.00015	3.00015	3.00015	3.00015	3.00015	3.00015	3.00015
Fixed/Offset Polariser	None	None	None	None	None	None	None	None	None	None	None	None	None	None	None	None
Fixed/Offset Slit	3.00015	3.00015	3.00015	3.00015	3.00015	3.00015	3.00015	3.00015	3.00015	3.00015	3.00015	3.00015	3.00015	3.00015	3.00015	3.00015
Detector	pmt900	pmt900	pmt900	pmt900	pmt900	pmt900	pmt900	pmt900	pmt900	pmt900	pmt900	pmt900	pmt900	pmt900	pmt900	pmt900
340	5283.29	4414.12	4631.87	4567.92	4611.97	4633.5	4525	4800.77	4402.96	4560.47	4743.32	4381.25	4620.79	4613.77	4675.63	4875.7
341	4477.47	3981.32	4047.16	4243.17	4546.2	3754.97	4039.8	4223.1	3995.97	3942.5	4057.76	4039.51	4187.63	4114.87	4011.83	3884.43
342	3753.5	3597.81	3457.05	3593.14	3446.3	3667.52	3521.69	3642.33	3434.7	3553.65	3457.86	3646.58	3574.48	3572.68	3591.74	3676.55
343	3591.09	3329.69	3114.01	3051.7	3251.92	3254.46	3396.5	3344.52	3150.1	3209.55	3219.62	3086.99	3174.18	3268.56	3234.15	3104.35
344	3256.15	2871.88	2727.88	2854.82	2838.02	2663.73	2771.19	2868.15	3062.83	2615.46	2936.1	2941.03	3074.61	2795.84	2827.02	2882.03
345	2668.83	2493.77	2671.62	2604.31	2709.07	2547.96	2692.99	2675.58	2727.73	2832.96	2489.85	2691.81	2601.92	2601.79	2593.88	2581.97
346	2622.94	2350.34	2470.07	2479.59	2501.26	2451.22	2584.63	2575.63	2612.19	2391.05	2326.13	2375.03	2411.57	2391.63	2274.68	2352.86
347	2507.71	2122.78	2495.03	2229.14	2160.04	2137.34	2235.38	2227.59	2153.05	2172.59	2132.99	2206.38	2321.91	2155.75	2203.11	2382.21
348	2238.42	2111.66	1918.08	2045.22	1937.16	2134.02	1838.76	2100.99	2052.63	1970.42	1990.79	2092.95	2159.55	2093	2064.8	1986.45
349	2032.61	1956.24	1891.47	1800.38	1897.36	1893.86	1894.59	1920.97	1907.85	1754.67	1989.21	1952.88	1997.82	1925.88	1893.19	1916.29
350	1890.49	1859.37	1784.21	1774.33	1803.92	1818.84	1623.74	1831.23	1839.03	1799.6	1820.57	1680.56	1655.5	1723.4	1842.71	1747.83
351	1883.79	1620.35	1649.65	1659.56	1661.56	1672.98	1513.68	1781.48	1734.71	1582.6	1639.66	1599.25	1688.16	1735.39	1765.25	1681.93
352	1682.72	1586.18	1538.85	1525.53	1534.35	1562.21	1681.78	1631.67	1501.14	1435.08	1657.66	1439.73	1435.11	1516.41	1557.39	1594.9
353	1553.76	1319.33	1384.68	1420.54	1511.91	1465.21	1481.28	1363.91	1527.51	1423.63	1424.71	1399.08	1348.3	1515.42	1490.55	1501.57
354	1353.97	1295.69	1398.97	1280.72	1338.95	1391.76	1285.55	1306.6	1405.81	1270.64	1411.39	1397.28	1226.81	1316.68	1436.82	1278.83
355	1559.81	1228.58	1186.89	1155.84	1184.02	1401.95	1234.47	1257.47	1329.34	1049.79	1305.39	1257.87	1228.55	1249.5	1215.57	1273.3
356	1301.27	1141.83	1302.79	1156.03	1264.32	1249.3	1181.78	1225.66	1112.92	1185.28	1189.24	1109.87	1210.91	1220.59	1242.26	1223.34
357	1194.54	1080.93	1071.06	1076.99	1286.82	1225.92	1151.71	1213.84	1167.82	1125.92	1201.84	1077.04	1128.63	1249.94	1185.23	1071.32
358	1228.43	1086.74	1069.97	1087.43	1202.96	1029.22	1135.53	1048.29	1263.19	1072.91	1137.63	1009.34	1132.28	1117.43	1141.2	1247.32
359	1190.31	1116.65	1049.49	1149.57	1214.78	1097.07	990.563	1031.91	1064.06	1033.93	1076.6	1107.15	968.13	1069.03	1027.91	1062.19
360	1076.39	995.636	989.421	1039.15	1072.72	934.906	1032.55	1004.82	1053.77	941.297	982.557	953.75	1089.99	1027.85	1011.38	1075.56
361	1167.25	1014.53	952.635	977.516	967.044	948.251	1018.54	910.362	947.928	932.177	966.739	1062.67	953.584	971.683	1109.45	954.466
362	1065.14	1056.97	978.236	837.25	973.922	949.1	896.215	983.973	1106.91	968.091	939.372	849.05	927.93	918.715	867.677	954.015
363	1096.43	928.604	858.849	863.824	1004.14	847.61	906.05	974.839	1011.4	950.156	894.185	935.728	890.333	911.495	1009.9	896.823
364	1075.57	928.205	978.342	886.842	956.179	858.255	957.409	945.735	980.705	874.029	1010.7	899.189	1012.02	918.742	1020.77	936.938
365	1065.32	978.71	1004.69	1004.64	1090.68	1125.21	1031.54	1103.51	1058.65	1007.63	1040.42	926.543	989.442	1078.34	1065.08	1025.37
366	1257.48	1307.36	1285.04	1167.17	1195.78	1260.9	1297.3	1233.92	1318.38	1134.46	1217.75	1107.62	1180.35	1291.38	1337.33	1186.29
367	1575.86	1526.24	1527.76	1518.5	1536.82	1541.28	1565.88	1600.35	1623.21	1418.72	1663.67	1601.91	1532.52	1574.41	1569.08	1573.22
368	2103.98	2311.51	2095.3	2208	2163.96	2143.9	2111.61	2254.36	2224.42	2104.52	2038.83	2116.7	2082.11	2112.58	2169.18	2100.33
369	2953.36	2889.8	2960.48	2869.47	2918.46	2888.9	2954.72	2945.36	3058.28	2881	3204.34	2923.75	2788.25	2892.69	2937.21	2860.42
370	3752.08	3650.08	3649.57	3978.61	3838.62	3892.39	3842.15	3995.44	3901.4	3892.5	3862.8	3841.39	3735.12	3946.07	3892.09	3736.03
371	4892.15	4597.34	4534.22	4741.05	4652.65	4678.27	4617.3	4708.41	4767.65	4419.07	4744.05	4814.86	4645.09	4462.25	4747.08	4822.71
372	5390.26	5150.86	4968.25	5228.14	5407.45	5199.73	5256.95	5401.92	5458.04	5588.96	5426.7	5427.51	5425.45	5405.08	5220.92	5188.22
373	5736.14	5320.59	5416.72	5390.97	5593.86	5497.31	5369.02	5667.98	5749.08	5373.29	5560.9	5469.8	5683.68	5492.98	5767.32	5570.81
374	5335.82	5268.33	5154.5	5350	5099.63	5269.61	5172.46	5140.51	5071.38	5135.97	5046.72	5228.5	5305.11	5298.16	5435.01	5231.92
375	4642.8	4449.87	4550.35	4539.56	4670.86	4511.81	4570.39	4602.1	4476.85	4646.31	4771	4541.33	4640.98	4770.73	4766.06	4628.93
376	3599.13	3546.36	3643.46	3516.73	3699.27	3747.13	3821.51	3666.84	3823.04	3856.32	3787.91	3760.19	3679.68	3691.43	3658.78	3768.05
377	2991.33	2574.35	2668.8	2621.42	2794.48	2733.08	2797.37	2866.62	3082.13	2767.68	2887.16	2895.01	2835.03	2705.22	2833.86	2649.37
378	2144.78	1901.89	1982.65	1914.23	2009.72	2001.21	1974.93	2043.98	2124.7	2110.47	2090.95	2091.41	1942.82	2311.67	2060.81	2088.64
379	1535.18	1391.57	1396.93	1503.92	1390.5	1529.28	1459.6	1545.58	1541	1471.63	1539.26	1413.99	1559	1588.83	1530.3	1505.57
380	1290.08	1100.75	1120.4	1133.1	1144.49	1081.17	1088.48	1203.5	1242.82	1128.52	1147.42	1101.6	1101.17	1160	1079.25	1124.87
381	1081.29	1025.67	929.985	970.246	1008.06	973.658	985.292	987.377	1039.15	1018.3	1008.43	923.445	942.18	1038.38	949.707	993.678
382	943.301	822.105	828.794	847.185	887.312	851.71	816.427	883.204	897.567	791.795	874.837	896.462	936.038	896.44	940.987	960.7
383	938.841	684.41	734.408	854.239	783.361	831.381	790.207	814.811	972.952	872.799	898.735	974.23	877.691	897.655	936.383	837.34
384	915.127	751.357	837.469	789.081	801.346	802.996	731.163	826.468	986.339	842.259	891.161	791.873	820.065	837.18	905.557	786.912
385	801.741	778.059	677.959	743.741	892.902	772.756	753.435	866.969	863.878	786.34	791.627	867.011	864.256	780.76	824.753	794.189
386	741.376	767.958	639.035	665.16	746.856	690.371	815.109	843.397	859.915	748.383	813.566	698.513	777.361	775.38	857.191	805.393
387	826.119	696.871	675.235	686.604	716.181	727.706	729.581	693.72	815.909	757.731	869.776	705.938	768.568	770.551	791.182	791.7
388	800.224	655.47	666.212	744.69	697.123	793.341	770.382	736.343	901.417	640.934	846.994	821.348	785.962	776.057	850.198	787.525
389	757.502	688.554	676.08	772.923	698.68	667.757	664.785	707.738	887.338	739.299	851.548	760.615	802.054	722.17	850.383	770.224
390	789.967	705.63	671.293	722.888	721.66	804.906	735.146	767.677	943.081	732.302	802.791	795.346	758.254	834.81	835.481	730.344
391	793.316	747.596	649.241	736.034	719.039	742.115	839.513	838.893	888.851	828.215	869.781	763.541	902.275	843.299	816.45	827.597
392	873.558	664.025	711.112	755.391	766.428	799.467	709.576	806.464	945.365	795.807	883.522	830.338	844.585	871.599	954.374	803.73
393	796.582	763.172	715.061	733.631	826.78	797.822	787.425	804.631	930.178	840.179	864.898	824.797	871.109	825.158	833.136	806.002
394	829.318	726.792	671.812	670.526	737.369	753.352	682.652	818.098	923.768	788.994	853.585	931.833	795.716	798.557	816.565	846.029
395	818.539	680.227	736.022	712.919	746.952	742.401	744.332	852.247	793.884	738.506	873.865	826.837	780.848	742.077	759.972	724.484
396	675.532	690.979	699.509	694.937	697.849	744.566	758.133	709.066	792.746	735.04	865.678	717.531	713.365	775.346	737.693	723.04
397	633.126	622.104	578.201	678.92	703.423	720.566	724.881	731.98	854.019	701.387	775.418	675.128	718.857	760.063	774.963	741.93
398	695.755	563.67	601.351	622.402	659.721	736.057	719.591	786.204	804.085	711.565	731.049	711.175	709.931	750.872	730.896	658.566
399	783.18	621.206	656.27	701.029	723.981	720.26	668.303	712.941	860.833	695.564	714.688	753.662	769.953	745.874	797.688	677.674
400	788.044	755.988	675.055	691.66	641.446	659.029	693.583	682.047	765.817	645.468	819.383	681.036	734.861	659.413	803.201	694.19
401	753.577	710.578	697.978	677.32	646.813	731.205	714.492	739.559	867.11	699.143	790.412	645.932	788.352	722.767	742.678	735.397
402	742.14	742.057	729.445	727.63	776.393	737.025	660.364	836.991	948.411	739.219	868.13	747.738	844.151	789.67	708.428	815.977
403	899.094	702.026	813.014	798.573	793.898	800.765	803.375	836.469	957.997	876.589	961.325	851.968	867.727	818.382	963.316	862.189
404	1050.7	885.771	874.581	880.044	902.451	861.186	972.115	964.94	1067.43	935.22	1030.06	924.115	931.905	964.12	905.236	997.953
405	1042.5	954.071	918.56	943.554	966.93	914.987	981.563	932.994	1087.25	915.127	979.107	935.954	1022.96	933.623	934.062	941.701
406	1018.25	881.934	913.673	905.027	911.911	953.038	903.555	945.959	1136.49	897.849	1043.51	1006.53	936.983	879.638	939.541	961.758
407	848.765	798.619	726.783	736.361	820.015	811.989	808.514	863.074	980.126	780.966	878.993	817.498	910.265	862.116	768.017	806.972
408	668.182	698.52	700.136	675.139	623.281	666.231	671.53	654.946	784.224	694.125	729.841	739.364	678.981	696.285	779.878	587.281
409	687.536	539.203	617.589	532.018	605.797	586.982	586.526	642.886	671.896	602.03	695.702	617.084	607.74	571.07	620.288	593.968
410	444.222	396.548	402.82	378.614	406.245	426.937	410.617	424.58	502.333	413.112	512.486	500.497	420.87	499.645	426.657	455.133
411	461.972	433.929	332.901	446.034	352.82	388.98	410.511	414.326	541.254	438.382	514.097	397.198	400.683	494.656	418.505	426.781
412	414.693	359.034	394.591	380.835	414.652	448.426	452.872	451.718	574.729	432.15	474.915	433.086	443.373	401.103	452.674	454.64
413	395.646	409.106	385.27	383.267	425.244	383.929	402.147	495.624	555.085	409.156	585.265	439.324	445.917	419.46	464.788	409.982
414	426.163	364.83	391.995	403.775	420.046	345.677	418.124	418.134	569.596	394.319	555.253	438.213	438.287	382.957	461.546	442.38
415	445.794	373.269	367.496	367.424	398.946	424.534	425.859	439.929	567.668	412.475	549.195	479.57	475.655	434.528	403.23	401.624
416	419.912	375.181	437.695	404.841	414.977	383.413	404.36	443.618	564.785	455.613	503.64	424.439	385.969	446.159	440.497	434.776
417	419.808	402.768	360.421	457.164	370.912	387.596	410.673	415.021	537.304	395.425	540.487	453.973	479.894	448.175	383.963	450.531
418	494.097	361.159	384.569	416.905	408.454	398.232	413.617	414.019	603.001	392.375	508.323	393.159	451.734	485.012	471.681	423.992
419	429.599	338.875	420.161	413.775	428.495	418.549	410.504	430.404	579.764	389.342	510.634	417.025	453.885	390.994	420.488	484.116
420	436.475	360.845	399.747	391.67	423.314	388.244	353.468	457.748	543.557	390.166	488.082	406.125	444.285	411.298	465.498	383.018
421	415.778	355.87	440.739	377.228	388.925	355.87	409.8	396.194	530.507	409.87	499.67	372.08	374.071	367.868	419.834	401.161
422	343.051	398.282	280.581	372.136	309.249	307.094	364.378	354.538	452.354	358.838	476.958	363.052	372.761	381.891	393.51	378.615
423	381.911	361.168	338.67	342.018	359.731	344.37	294.809	370.682	551.753	319.698	490.631	352.537	364.104	367.299	380.825	333.627
424	372.056	303.83	349.447	350.928	415.858	290.368	381.362	346.814	468.776	375.899	491.61	367.174	346.432	355.05	366.344	340.415
425	386.903	339.241	315.17	341.327	390.877	333.928	362.133	348.59	447.604	354.394	417.045	379.621	298.38	358.463	405.622	356.861
426	354.49	314.055	349.1	367.581	337.42	288.092	335.623	312.869	439.763	354.274	409.215	346.789	315.133	350.758	371.514	314.78
427	339.227	391.197	339.36	342.693	357.787	331.526	331.494	373.167	469.923	299.335	411.202	361.925	354.552	359.829	373.585	337.291
428	359.428	309.754	319.523	330.908	332.782	350.327	334.917	353.702	454.092	327.492	456.006	333.244	309.095	372.933	369.372	301.055
429	356.912	332.596	309.874	306.482	332.774	320.418	319.92	361.136	499.295	340.743	432.932	287.843	344.747	340.71	352.238	310.568
430	334.051	329.107	332.833	321.823	346.264	292.123	350.653	366.793	473.085	333.335	430	306.827	278.641	265.037	342.863	365.959
431	356.701	272.73	274.484	312.389	329.773	306.844	320.196	342.39	465.868	348.632	411.539	327.973	371.432	324.032	362.08	343.491
432	332.118	297.468	270.685	291.613	316.63	312.215	297.764	327.544	390.346	299.457	458.941	328.094	343.116	326.015	333.832	320.641
433	311.039	327.538	293.602	295.453	325.93	312.21	320.471	267.012	433.836	320.261	415.174	295.719	322.25	325.835	333.843	352.562
434	333.491	293.069	327.166	297.283	316.234	293.411	337.351	334.649	446.785	356.061	431.608	316.234	329.465	312.325	367.55	324.069
435	306.487	300.012	298.045	290.768	324.786	270.183	292.842	328.076	409.829	338.053	409.699	288.951	283.257	290.655	302.178	308.031
436	300.767	339.976	294.288	316.91	286.728	321.011	292.615	324.377	428.154	303.861	398.063	296.535	324.819	288.636	362.589	319.262
437	298.785	294.575	295.744	277.203	294.06	290.48	333.766	275.163	391.823	275.163	403.498	298.315	286.875	297.924	313.397	304.291
438	308.609	311.434	286.444	311.488	281.03	266.096	290.517	305.891	446.964	325.971	333.971	285.273	320.927	232.098	270.002	266.628
439	320.381	281.05	284.843	273.944	282.806	311.616	307.899	323.073	438.023	292.332	339.871	287.169	317.39	269.877	338.007	336.938
440	310.922	293.934	288.365	226.416	284.859	288.969	243.392	277.637	405.682	290.44	375.547	328.423	298.274	275.667	353.098	296.668
441	289.045	299.899	287.044	309.833	327.346	304.566	294.612	312.072	457.427	321.309	375.938	334.906	298.847	283.84	251.524	302.703
442	286.289	257.23	263.233	280.502	250.552	271.182	318.007	282.371	382.068	295.455	427.343	308.981	290.127	299.408	308.786	293.673
443	259.649	261.054	217.948	276.663	227.951	307.082	282.131	293.637	389.833	329.209	312.764	291.989	293.973	278.525	259.668	254.091
444	308.66	276.417	238.96	233.548	254.371	267.756	237.372	314.628	416.799	290.206	385.319	222.604	305.378	250.694	322.085	316.712
445	291.428	289.245	238.638	263.276	274.666	231.465	239.015	238.94	442.66	263.751	350.343	267.512	263.315	272.851	278.72	295.605
446	320.667	238.93	274.782	252.657	243.442	271.459	271.677	326.278	426.496	270.224	397.753	292.629	290.402	269.698	258.508	281.103
447	269.313	255.9	240.923	303.441	300.065	263.855	269.418	277.041	358.412	207.688	337.358	307.337	211.249	235.625	267.826	252.885
448	286.236	243.089	226.124	254.501	250.883	275.231	282.896	237.552	383.02	256.548	382.955	271.554	258.737	237.609	275.539	266.2
449	280.696	252.561	254.631	267.6	260.328	279.07	231.997	269.491	356.787	269.57	319.211	220.627	258.812	311.564	292.553	281.51
450	228.055	239.23	286.831	276.83	277.213	264.058	284.874	307.065	390.751	258.28	339.883	303.622	285.311	290.654	298.284	239.9
451	275.394	256.531	239.841	241.271	256.681	252.79	266.215	301.626	424.801	302.117	338.372	313.386	270.478	271.694	285.456	283.476
452	277.714	241.954	224.702	239.877	232.661	245.663	232.509	302.208	347.716	236.588	357.948	258.992	310.729	279.957	268.954	297.401
453	234.899	242.406	238.271	249.793	261.598	259.652	227.272	291.319	325.63	244.597	343.42	246.397	246.541	309.155	252.329	242.955
454	278.122	236.578	243.859	257.235	215.822	230.957	234.709	223.037	399.189	200.921	356.333	248.103	263.312	312.435	282.461	240.721
455	272.681	274.875	223.545	261.478	284.513	219.97	233.034	267.124	365.957	243.038	298.276	267.598	267.579	238.933	262.179	273.431
456	274.491	236.843	204.558	229.387	276.908	225.705	288.099	250.331	377.531	208.797	265.981	246.826	239.191	257.967	245.118	262.022
457	268.995	214.335	293.7	221.955	235.28	244.565	246.454	290.15	343.441	263.889	340.399	271.615	206.929	212.557	197.514	280.818
458	236.99	227.394	208.424	189.652	239.101	237.059	227.461	267.52	369.803	281.081	307.864	282.918	237.059	282.87	205.118	267.565
459	275.123	286.292	227.699	239.2	273.671	229.731	269.634	269.49	324.85	230.016	307.94	239.614	246.884	218.514	247.202	228.27
460	249.055	230.06	262.439	205.452	238.267	205.447	236.079	252.71	350.259	255.304	266.567	243.831	242.02	215.053	245.909	246.005
461	261.027	228.676	224.772	262.799	238.878	243.963	219.206	276.049	337.461	208.078	327.992	282.349	249.905	236.546	252.101	232.821
462	259.288	255.314	263.325	293.663	217.937	244.089	217.387	255.624	353.24	227.363	326.485	215.884	257.82	204.441	276.797	223.286
463	263.337	303.152	284.542	255.921	242.659	271.068	206.185	233.077	395.639	241.276	361.245	219.949	241	280.948	256.164	295.978
464	244.72	257.771	259.908	237.067	223.76	248.574	256.291	239.235	334.782	262.674	325.541	229.587	258.241	252.669	224.071	260.091
465	283.31	246.939	229.672	214.517	184.055	220.413	243.501	258.55	360.336	256.891	289.609	253.125	248.968	229.839	253.18	239.731
466	297.364	251.394	249.312	234.282	255.636	218.941	209.527	266.617	284.308	226.579	336.298	245.99	313.146	259.014	232.526	280.555
467	298.385	237.042	269.346	300.471	277.641	196.586	281.525	238.662	321.822	277.52	316.464	296.633	289.111	269.713	258.317	260.403
468	268.423	262.929	266.291	241.675	272.629	251.507	257.455	243.395	355.84	307.605	282.895	270.616	261.352	276.88	238.022	296.458
469	257.775	215.502	300.605	250.704	295.102	250.887	262.282	267.434	322.282	269.961	246.769	248.38	215.764	264.308	247.016	208.171
470	267.006	233.953	228.154	177.643	257.636	259.645	230.407	235.748	376.439	277.289	324.005	193.054	269.288	232.173	220.982	236.466
471	221.424	217.321	233.085	221.624	265.016	219.881	261.027	192.134	276.438	229.709	280.441	215.787	204.066	235.181	273.334	241.583
472	247.792	206.493	202.452	187.063	210.99	193.191	208.804	295.184	313.077	201.106	267.939	207.016	228.848	177.114	205.299	228.775
473	270.223	189.367	226.841	227.26	197.69	201.688	235.096	227.034	326.283	231.353	269.054	288.718	229.504	246.77	227.52	266.842
474	197.865	245.036	180.092	239.9	263.807	204.004	209.879	199.94	313.288	229.824	275.722	217.979	192.274	217.873	220.111	199.979
475	198.314	227.972	170.757	208.523	200.775	178.66	164.66	226.297	319.938	186.646	254.478	224.602	208.609	198.632	216.788	202.447
476	190.911	181.095	183.17	261.04	205.385	187.325	197.169	163.462	291.05	189.363	263.231	193.529	197.183	203.203	199.636	175.317
477	205.671	228.067	159.907	209.985	210.322	174.229	196.024	190.037	262.575	218.542	288.597	132.264	211.99	148.141	188.321	238.441
478	192.647	199.011	146.553	186.641	189.134	171.013	170.776	210.636	247.888	165.263	253.687	221.3	211.195	203.001	195.047	195.256
479	199.521	217.834	179.389	157.122	183.845	175.751	195.571	197.439	290.877	191.93	220.253	189.795	218.126	201.777	179.599	177.754
480	187.951	220.179	202.176	190.027	226.668	243.007	226.322	228.403	313.632	230.733	247.207	190.23	202.422	167.953	218.61	184.213
481	232.692	220.552	176.289	184.493	210.757	214.946	178.237	230.697	285.932	190.608	259.797	229.23	223.138	176.186	235.441	201.064
482	228.862	194.691	172.66	209.198	194.928	186.852	201.02	216.837	255.899	209.208	249.879	213.452	194.971	178.576	207.389	181.168
483	221.089	179.023	193.231	185.131	171.09	205.54	237.563	245.792	264.473	189.246	256.56	179.411	219.726	176.95	203.634	181.459
484	219.702	185.741	195.499	181.65	198.055	185.601	185.11	197.517	246.71	185.777	218.596	212.43	144.891	205.992	208.29	208.259
485	189.881	194.247	157.118	179.934	180.039	167.682	189.835	173.547	255.26	192.334	257.64	181.873	202.471	175.948	207.054	145.33
486	194.766	186.406	159.614	161.782	151.731	104.681	192.341	159.788	286.319	196.83	196.639	217.169	159.889	168.097	199.39	172.453
487	168.105	145.912	174.522	164.077	150.011	129.601	151.933	153.99	225.381	147.974	201.277	156.245	149.982	158.158	152.393	181.029
488	188.771	179.146	160.414	180.932	168.796	187.455	125.528	183.25	271.319	197.952	218.312	195.766	162.661	179.141	175.351	216.442
489	152.28	175.379	175.205	146.422	142.463	169.325	171.161	146.554	208.033	188.097	251.812	140.501	161.042	148.741	152.943	169.556
490	210.595	155.195	163.262	175.811	167.815	169.771	149.038	186.108	235.696	163.619	215.481	161.584	167.913	145.11	198.94	170.031
491	167.824	182.708	172.297	184.78	199.502	186.888	149.437	168.101	213.856	176.612	224.592	211.78	160.2	166.369	185.139	141.441
492	149.717	152.28	177.226	139.699	160.511	158.426	160.328	160.534	233.431	171.071	231.667	172.921	166.939	158.457	169.141	171.279
493	190.076	148.767	194.537	182.256	198.73	165.332	169.213	179.785	246.748	198.851	178.101	215.617	163.275	194.679	150.892	172.008
494	163.131	140.728	148.938	168.05	170.084	149.086	153.189	159.426	241.343	189.144	191.148	176.53	165.961	170.18	130.388	178.975
495	148.697	141.131	157.91	175.077	158.109	153.889	181.035	164.119	233.917	162.492	191.914	137.138	189.741	147.501	149.95	133.051
496	153.522	135.301	143.757	146.038	141.853	169.237	168.839	152.084	177.846	158.783	203.287	165.099	131.2	146.003	175.939	178.015
497	181.739	148.726	152.901	138.129	159.384	155.062	137.787	123.224	193.522	112.535	161.627	133.801	131.575	123.263	138.284	170.254
498	167.872	134.544	141.005	177.131	151.422	123.745	153.387	117.384	194.312	170.521	200.728	140.947	132.234	115.236	153.843	160.229
499	185.745	145.876	126.486	134.94	132.84	160.611	169.025	136.992	190.87	145.632	216.59	141.679	130.786	162.955	165.344	135.173
500	152.33	141.867	124.659	161.346	88.2517	98.9419	141.833	105.287	185.154	152.707	185.231	131.429	122.739	133.496	161.672	133.542
501	191.768	148.945	118.62	170.643	136.294	177.205	129.536	116.565	185.953	116.653	155.621	175.184	177.175	170.722	147.244	134.186
502	170.855	143.132	103.99	140.936	154.125	104.136	164.938	143.159	182.265	167.162	175.897	143.372	173.628	136.553	184.929	136.852
503	115.351	128.565	152.31	135.008	137.265	141.602	141.916	176.441	213.544	135.136	196.298	146.607	130.916	126.316	133.277	154.986
504	148.844	135.668	129.025	157.646	124.797	133.509	138.286	146.648	168.598	155.543	184.18	146.353	109.698	105.072	149.091	166.858
505	138.425	116.591	103.269	169.556	112.192	134.164	147.576	114.4	153.832	140.896	182.947	127.093	171.721	127.646	169.581	152.218
506	141.126	141.349	139.012	141.407	165.663	125.855	114.773	123.683	167.66	125.877	181.567	120.975	136.875	128.101	145.919	115.109
507	148.164	132.926	143.909	119.637	119.744	117.412	119.494	132.858	192.738	104.171	188.794	125.669	117.49	112.897	144.137	115.444
508	148.771	113.436	122.238	148.984	108.985	120.01	142.168	144.481	146.725	108.943	211.813	148.627	113.669	113.332	129.075	135.778
509	104.883	136.45	111.61	147.498	127.428	133.959	100.608	129.547	205.553	129.396	174.468	156.255	134.219	111.7	111.811	134.102
510	150.185	132.564	154.938	143.739	118.99	134.621	148.353	130.203	175.276	148.076	152.789	145.939	139.294	121.203	150.587	92.1253
511	135.285	108.249	135.479	133.079	108.244	101.469	144.434	115.032	137.747	151.238	137.919	106.061	142.126	142.074	115.312	153.547
512	147.408	151.841	88.5654	106.691	142.869	99.8884	151.955	127.032	181.518	136.192	170.671	140.779	154.197	145.204	143.28	154.463
513	173.361	120.92	116.612	105.039	100.482	105.126	141.567	114.184	180.362	125.553	171.509	111.846	132.331	102.706	141.84	118.928
514	105.532	160.713	137.948	105.634	121.688	107.991	147.13	103.388	163.084	96.5167	174.751	128.651	133.269	128.561	112.644	131.089
515	101.454	110.738	136.288	147.784	117.794	127.02	140.802	124.587	129.236	103.815	173.323	120.203	99.3238	124.638	99.3818	129.371
516	104.357	127.566	139.39	111.433	97.4972	92.7665	113.65	122.817	166.951	106.63	169.525	143.973	125.293	97.3906	106.777	109.178
517	132.729	107.193	107.498	128.24	97.986	132.871	128.246	114.222	170.292	104.949	184.195	111.9	130.534	118.772	144.734	121.437
518	147.431	117.116	110.301	121.899	93.7933	124.201	110.007	107.852	164.298	131.4	131.272	112.53	70.3211	112.41	115.028	107.975
519	87.094	117.8	82.5324	136.828	110.864	106.098	91.8329	134.221	150.982	136.895	155.561	108.487	129.656	117.757	113.196	108.63
520	108.804	123.294	118.523	118.57	125.8	99.5234	111.42	127.893	189.633	118.552	158.895	121.097	97.227	99.4606	113.816	92.6374
521	145.138	97.8696	105	116.943	119.609	90.5783	104.975	116.881	140.7	112.018	171.894	119.461	107.339	95.3827	136	107.509
522	122.171	134.475	81.7111	98.3423	96.1049	86.3557	127.212	122.394	120.003	129.433	146.642	134.681	100.888	112.781	151.336	81.6395
523	108.343	110.987	106.312	122.953	96.5789	94.1049	113.4	130.214	156.986	98.9043	157.048	101.616	125.586	101.329	127.986	103.754
524	103.994	109.133	109.316	133.194	82.5243	99.4395	121.185	128.441	123.795	113.994	155.362	99.6844	130.944	113.975	128.647	97.0661
525	107.081	100.028	119.694	68.2237	117.16	121.911	90.1878	95.0582	156.084	109.8	134.35	114.873	119.403	136.447	109.861	102.577
526	119.978	88.3848	100.793	73.5449	90.8312	88.2861	120.392	115.215	120.214	117.912	137.665	110.602	122.733	105.409	90.8864	73.7024
527	98.6017	101.317	116.212	106.205	71.6862	96.3797	96.4477	86.482	145.823	103.887	101.488	91.3972	125.968	71.62	91.524	86.5493
528	114.204	92.0655	101.969	94.5537	99.5424	104.474	119.428	111.991	82.2345	94.5767	122.017	84.5431	156.653	79.5913	82.1364	92.1349
529	87.3808	107.604	82.4877	80.1009	85.1361	80.0191	140.207	107.664	130.284	122.645	190.332	105.16	75.0526	60.0976	102.694	97.6704
530	110.584	123.288	108.163	73.0037	78.0461	90.5945	105.838	83.1217	143.406	83.1177	138.513	80.6775	98.2204	90.6408	88.1851	110.915
531	126.544	91.1826	81.0236	103.902	83.6288	98.7883	103.999	121.547	126.578	81.1301	134.359	93.898	116.573	80.998	81.1479	91.3403
532	119.55	114.669	94.2375	117.283	114.806	79.0691	107.296	119.739	132.413	97.0178	114.789	86.8223	84.1376	96.66	91.8088	107.1
533	104.968	112.835	74.3687	112.786	115.633	107.801	118.254	76.95	146.141	100.196	135.945	82.2821	87.2142	84.2578	120.558	107.777
534	103.054	136.819	90.3764	131.525	85.3075	108.423	95.6478	118.679	90.3478	100.784	124.008	95.7574	123.851	110.301	90.3654	113.627
535	95.9796	101.384	111.72	114.338	122.306	80.515	132.744	90.9106	148.144	104.004	132.741	104.085	145.549	90.3836	98.8423	80.609
536	115.095	109.963	88.9353	123.063	99.4176	109.77	96.9238	120.315	128.256	86.3804	125.788	115.149	86.309	91.0245	102.16	73.3531
537	105.273	102.714	110.65	97.5816	100.073	115.798	113.273	92.179	123.904	110.623	110.89	100.104	97.4654	94.3723	97.6482	92.3294
538	105.925	92.7181	100.768	124.734	84.8512	103.352	108.692	90.1829	122.003	98.1164	140.802	129.969	116.685	105.748	124.865	90.2795
539	111.87	114.748	74.716	40.0332	117.354	85.3627	101.504	104.109	82.6369	96.0938	98.7726	120.073	74.7232	111.791	112.317	96.2295
540	123.308	80.5297	72.519	107.459	75.1081	102.032	77.9495	99.3489	115.367	75.2104	118.15	99.4311	99.332	91.1031	88.7703	88.7811
541	105.246	81.0152	75.6859	73.0752	91.8618	83.7096	70.3156	78.4557	97.2513	86.4855	105.515	113.717	86.4519	107.908	73.1108	83.9257
542	89.6516	95.1289	73.1968	87.0722	87.1146	81.545	111.61	92.6493	100.68	78.9073	136.206	70.9064	116.975	57.0566	87.2227	103.698
543	84.9073	98.5374	73.6652	101.287	76.8678	125.994	76.7314	107.05	87.6718	117.806	112.422	74.0955	79.5531	68.4719	85.1348	85.197
544	88.2012	110.38	98.991	88.2612	96.7024	102.121	85.6903	80.1268	121.433	88.3127	146.414	80.1249	82.9181	74.5102	107.922	91.2232
545	83.2962	108.461	72.0502	122.218	77.8508	75.0832	86.3473	75.0832	116.861	94.5446	130.844	103.067	83.438	97.3183	122.65	100.191
546	83.9703	70.0705	81.0473	75.5623	109.265	100.833	100.99	100.828	140.257	78.4924	92.599	56.1424	81.2799	58.8564	81.3412	70.0842
547	101.469	96.0322	61.9381	76.1849	70.5793	73.3098	98.9603	87.5418	81.868	87.4886	96.065	59.3111	84.7055	87.5162	110.203	101.676
548	85.1235	93.7816	113.465	79.5935	76.7136	79.4892	71.173	82.3701	102.22	65.3931	153.704	85.3805	116.593	59.614	110.968	113.805
549	91.4711	105.758	94.2746	120.175	77.3139	71.5052	77.3534	91.5022	91.4622	88.7311	97.5385	86.0613	74.4649	82.8172	85.9942	74.5084
550	74.7821	103.61	97.7611	89.2651	60.5096	103.784	63.4002	92.2163	118.06	106.594	77.9098	63.5145	51.8805	83.4331	46.18	83.628
551	101.387	84.1102	98.3537	81.2059	113.094	90.0641	107.43	95.7768	87.0338	63.8574	101.683	66.8592	89.9371	72.5299	78.4181	98.7151
552	55.4517	73.0301	84.4481	64.2743	111.054	102.344	87.7876	70.1191	102.396	96.5593	99.5266	99.5217	99.4031	64.3228	81.8952	108.227
553	97.0634	85.3354	79.2596	73.5543	111.971	138.571	103.181	85.4807	120.902	67.8545	112.004	88.4283	100.211	97.179	82.5853	85.5348
554	106.696	94.8613	115.36	74.186	86.1143	110.049	109.915	65.3837	95.0204	107.114	77.2698	107.085	77.1403	68.2743	83.2643	92.2461
555	83.6984	119.5	77.5299	110.833	92.7991	113.862	98.7573	116.767	143.689	92.8577	134.839	101.926	80.7602	98.6877	101.931	120.018
556	129.578	123.506	99.1692	120.69	105.609	99.4824	108.629	81.4719	105.599	96.5381	93.6739	93.6466	108.632	108.518	141.973	126.959
557	133.566	121.504	136.304	106.354	130.798	115.426	155.238	136.934	158.151	142.902	164.209	134.041	139.933	106.31	130.941	121.823
558	152.88	140.769	112.928	150.121	131.806	152.921	141.081	159.397	165.544	171.417	153.114	144.2	140.947	137.709	147.272	153.472
559	175.548	107.85	129.069	151.266	145.144	135.57	176.108	148.229	126.483	145.017	132.537	135.834	138.728	141.78	145.215	142.17
560	136.499	149.027	167.237	133.708	133.815	127.291	136.974	152.346	145.975	161.741	145.972	146.096	161.465	158.326	149.288	171.201
561	131.321	159.53	115.432	128.406	147.348	143.894	128.434	162.805	150.248	115.955	150.281	100.171	118.898	128.181	125.338	156.787
562	173.444	132.506	106.991	135.796	126.356	141.857	123.035	100.915	138.86	129.414	145.309	104.178	107.327	116.681	148.537	129.594
563	114.464	95.5815	95.2177	95.5211	140.067	104.966	120.858	104.956	130.415	127.25	105.122	114.689	127.42	92.2765	98.8445	95.642
564	83.3209	89.9397	93.0003	102.763	73.8108	96.2399	96.3242	121.966	115.505	57.7341	115.772	89.9769	96.364	64.2021	77.1531	112.496
565	90.5033	74.5138	77.5912	71.2688	103.568	64.6845	61.5623	93.9133	113.316	71.2221	81.1511	103.684	67.988	93.9521	97.3268	61.6778
566	74.9712	68.6401	88.1166	68.6151	75.1024	88.1294	75.2102	52.2286	75.1389	104.63	81.8498	62.1392	84.9004	68.6201	81.8338	72.0752
567	62.5019	98.8047	69.1431	75.7098	102.056	92.3074	72.522	85.5309	111.976	95.5855	82.5258	65.9547	98.7831	75.7061	79.2576	85.8038
568	49.7184	49.7957	63.0915	36.4894	102.871	56.4763	53.1516	59.7084	63.0286	89.689	86.5145	79.8187	69.7191	76.3479	86.5588	76.3999
569	76.8407	53.6079	66.8034	80.3063	66.9529	60.3207	66.9936	83.685	76.9584	53.5545	80.4314	97.2306	90.3644	60.2942	70.4513	46.8727
570	57.2822	104.702	60.587	84.3697	81.0146	74.276	60.7565	67.5154	111.271	67.4498	91.1215	67.5286	94.5147	50.6181	77.7581	64.1771
571	61.192	78.3134	57.6272	81.6706	51.0379	81.5853	78.2487	51.0156	146.199	64.6261	61.2604	85.0777	98.7526	67.9795	95.5054	71.5036
572	71.9471	37.7269	54.7437	68.6544	106.376	65.1773	61.7454	58.2939	92.6677	54.9342	82.4274	85.793	85.8515	61.7034	61.9019	96.2473
573	58.7019	72.5687	75.945	62.3077	65.6973	69.1987	76.065	48.3838	76.2206	72.7047	100.502	72.6286	45.0109	58.7175	76.2354	65.867
574	69.631	62.7349	86.9437	76.7357	62.7014	66.2282	62.7044	59.1993	115.076	59.2914	69.8498	83.6486	80.3077	73.1143	76.831	62.8878
575	63.1945	84.409	70.0902	63.2668	77.3844	59.7084	87.8171	73.7754	59.7418	77.3204	73.9011	73.8435	70.4283	101.9	63.3746	77.4503
576	53.135	63.7853	60.0737	92.2868	92.197	53.1376	67.3305	88.6186	85.0449	53.1518	85.0822	53.2294	67.4781	60.2709	78.1212	92.2351
577	67.9172	82.1256	85.5924	53.7024	67.9056	53.6019	78.6543	107.238	89.3234	85.7797	53.6175	96.5749	78.7481	60.7399	60.8909	53.6371
578	82.8852	71.9953	57.4762	68.5371	86.4953	36.0204	75.6557	72.0566	68.4471	79.297	100.997	75.7036	64.8762	57.5949	61.3346	61.2407
579	83.4935	58.0994	61.6482	61.7967	69.0215	47.2046	36.3024	54.4761	68.9628	61.7471	94.6323	83.6256	94.4367	105.318	76.4152	72.6825
580	54.8243	47.5918	106.262	66.0038	76.8641	91.496	73.2288	65.9027	73.1843	76.8697	88.0244	40.316	65.9284	47.6358	106.381	88.0179
581	77.3179	70.1039	88.7292	92.4375	51.648	36.8896	77.6361	59.0105	51.658	84.7905	92.3228	62.8345	110.804	77.6305	88.7508	73.941
582	74.302	92.9835	55.8879	44.7223	81.7699	93.0152	74.5099	111.518	74.4411	89.2187	81.9151	100.63	52.1303	74.4972	82.0448	81.9131
583	63.6971	60.0289	63.818	82.5438	82.4676	78.7784	78.7822	63.7265	97.5707	60.0187	93.8363	108.871	75.0015	93.7678	67.7037	60.083
584	56.6748	98.3988	52.9943	83.2079	94.6165	109.739	71.8404	79.4006	102.129	75.6748	155.103	106.009	68.0461	94.4649	49.2797	83.3376
585	99.0135	110.562	95.4625	68.6528	95.502	99.2206	99.0904	68.6378	106.809	99.0736	106.819	87.7657	72.4739	118.146	72.6275	61.0529
586	76.7818	76.8639	53.8924	88.5182	107.777	84.6181	65.3359	88.4601	88.4945	84.5605	84.6531	107.761	96.1616	100.028	119.444	57.7433
587	96.8186	89.164	77.6641	124.241	104.841	54.2737	58.1448	85.3765	97.0423	73.659	124.214	81.5513	73.702	93.1675	108.777	73.7971
588	54.7146	93.7646	93.9814	101.719	93.8877	89.8839	97.5412	101.687	58.7255	46.9142	97.8521	39.1618	62.636	113.45	58.757	78.3083
589	66.902	78.7866	55.2204	122.214	43.3569	43.3137	66.8452	74.8255	86.7981	43.3969	86.758	74.9967	82.8487	82.7802	35.5654	78.9208
590	59.5153	55.5908	39.7724	67.6148	95.3912	55.5989	79.2307	79.3711	59.6877	111.387	87.4419	35.8178	51.669	67.4966	59.7211	107.459
591	88.0387	40.0711	68.1672	72.1911	60.1373	60.073	87.8808	92.0494	72.2421	112.264	88.2121	80.1636	48.0958	80.008	72.2474	92.3745
592	80.7403	68.7127	76.7704	93.0275	72.7033	32.3196	44.3447	64.6157	80.9861	64.699	60.71	68.7427	97.0651	80.6756	109.344	68.8281
593	65.157	85.5539	73.3622	77.5661	52.9684	48.8666	77.2933	77.4304	69.4182	73.3783	73.4873	44.8848	81.5731	89.6083	65.4256	89.7784
594	69.8691	65.6713	74.0078	49.3217	86.204	69.8096	53.3203	57.4945	65.8344	73.9556	41.1255	86.3698	69.8929	86.2208	49.4456	69.9218
595	57.9687	57.9039	78.7311	82.8567	57.9335	45.528	49.6524	66.1952	49.7116	49.6681	74.5928	70.4436	53.8569	74.4135	58.0605	62.1789
596	62.5598	58.3254	58.4943	87.7436	50.088	70.9286	41.7116	79.1578	83.4881	62.5841	96.2007	70.9873	37.6291	87.5051	54.3148	75.2527
597	58.8331	54.5777	58.9962	84.1554	71.6243	63.1319	37.8497	50.4357	71.6836	63.1058	84.4508	54.7702	58.9933	88.2967	67.4505	67.4965
598	42.3843	76.301	29.7563	50.9526	29.7534	76.4419	42.3936	80.6201	55.2981	50.965	46.834	85.0843	80.724	101.888	68.0707	72.4168
599	64.1959	68.4706	85.8381	42.9003	42.9201	51.4053	59.9307	59.9758	34.3152	55.6972	73.0441	60.1686	77.1605	55.7216	64.4334	42.9588
600	60.4872	64.7684	64.9891	90.9184	47.61	34.5868	64.8345	43.1968	60.6226	60.521	65.0413	65.0492	86.5447	69.192	56.3623	65.016

## Sheet: Sheet1
Wavelength(nm)	0uM dmpg	0.01uM dmpg	0.02uM dmpg	0.03uM dmpg	0.04uM dmpg	0.05uM dmpg	0.06uM dmpg	0.07uM dmpg	0.08uM dmpg	0.09uM dmpg	0.10uM dmpg	0.11uM dmpg	0.12uM dmpg	0.13uM dmpg	0.14uM dmpg	0.15uM dmpg	0.2uM dmpg	0.3uM dmpg	0.4uM dmpg	0.5uM dmpg	0.6uM dmpg	0.7uM dmpg	0.8uM dmpg	0.9uM dmpg	1.0uM dmpg	1.1uM dmpg	1.2uM dmpg	1.3uM dmpg	1.4uM dmpg	1.5uM dmpg	2uM dmpg	3uM dmpg	4uM dmpg	5uM dmpg	6uM dmpg	7uM dmpg	8uM dmpg	9uM dmpg	10uM dmpg	11uM dmpg	12uM dmpg	13uM dmpg	14uM dmpg	15uM dmpg
340	5283.29	4414.12	4631.87	4567.92	4611.97	4633.5	4525	4800.77	4402.96	4560.47	4743.32	4381.25	4620.79	4613.77	4675.63	4875.7	4840.73	4744.43	4942.45	5041.14	5277.36	5007.75	5149.11	5305.89	5252.25	5070.85	5371.33	5451.19	5521.64	5528.94	4835.45	4573.62	4787.95	4801.58	4933.82	4703.03	5011.37	4913.55	4764.38	5578.3	4734.91	4919.56	5408.02	5018.71
341	4477.47	3981.32	4047.16	4243.17	4546.2	3754.97	4039.8	4223.1	3995.97	3942.5	4057.76	4039.51	4187.63	4114.87	4011.83	3884.43	3956.14	4032.22	4212.28	4301.9	4295.28	4444.76	4568.57	4726.29	4570.47	4862.87	4434.05	4967.18	5019.25	4874.48	4195.48	4058.13	4049.98	4382.69	4399.24	4408.3	4367.41	4279.02	4323.07	4637.54	4289.39	4158.49	4255.69	4268.66
342	3753.5	3597.81	3457.05	3593.14	3446.3	3667.52	3521.69	3642.33	3434.7	3553.65	3457.86	3646.58	3574.48	3572.68	3591.74	3676.55	3640.92	3633.4	3808.65	3567.25	3877.39	3883.13	3983.43	3918.42	4080.21	4306.21	4278.37	4495.53	4361.14	4313.08	3607.92	3403.91	3539.74	3686.41	3669.26	3554.07	3860.57	3760.09	4037.98	4372.14	4027.55	3740.88	3989.32	4056.92
343	3591.09	3329.69	3114.01	3051.7	3251.92	3254.46	3396.5	3344.52	3150.1	3209.55	3219.62	3086.99	3174.18	3268.56	3234.15	3104.35	3245.49	3359.35	3241.35	3292.21	3511.81	3428.1	3683.92	3696.14	3665.3	3606.81	3578.45	3802	3898.38	4009	3253.15	3355.46	3242.03	3380.31	3328.4	3331.22	3474.33	3301.4	3475.52	3991.13	3579.53	3255.02	3357.2	3549.86
344	3256.15	2871.88	2727.88	2854.82	2838.02	2663.73	2771.19	2868.15	3062.83	2615.46	2936.1	2941.03	3074.61	2795.84	2827.02	2882.03	3074.39	2970.96	2993.97	3117.19	3222.1	3103.93	3170.92	3203.62	3337.53	3456.54	3188.69	3435.7	3504.04	3539.37	3031.15	2873.05	2975.08	2973.54	3093.69	3120.36	3202.27	3267.97	3190.5	3437.43	3026.56	2951.21	3024.24	2946.61
345	2668.83	2493.77	2671.62	2604.31	2709.07	2547.96	2692.99	2675.58	2727.73	2832.96	2489.85	2691.81	2601.92	2601.79	2593.88	2581.97	2646.15	2584.74	2762.43	2733.09	2734.63	2991.31	3027.53	2826.3	2931.63	3074.45	2876.37	3001.19	3216.1	3084.59	2675.28	2689.61	2755.66	2789.66	2750.94	2728.07	2825.76	2695.8	2843.04	3194.15	2790.29	2820.56	2884.3	2802.09
346	2622.94	2350.34	2470.07	2479.59	2501.26	2451.22	2584.63	2575.63	2612.19	2391.05	2326.13	2375.03	2411.57	2391.63	2274.68	2352.86	2392.27	2573.95	2495.41	2659.72	2476.08	2587.46	2798.51	2623.33	2609.19	2516.12	2686.2	2758.68	2767.99	2888.21	2318.68	2477.56	2590.04	2375.73	2689.2	2445.56	2717.96	2596.54	2573.63	2700.51	2572.5	2498.87	2481.94	2704.44
347	2507.71	2122.78	2495.03	2229.14	2160.04	2137.34	2235.38	2227.59	2153.05	2172.59	2132.99	2206.38	2321.91	2155.75	2203.11	2382.21	2193.36	2134.8	2262.06	2288.68	2354.26	2347.67	2529.46	2512.46	2595.3	2603.88	2579.3	2635.07	2523.08	2800.76	2179.03	2316.72	2218.23	2208.52	2401.99	2369.62	2469.74	2441.96	2470.04	2597.19	2495.28	2404.61	2674.51	2303.45
348	2238.42	2111.66	1918.08	2045.22	1937.16	2134.02	1838.76	2100.99	2052.63	1970.42	1990.79	2092.95	2159.55	2093	2064.8	1986.45	2191.77	2122.86	2060.49	2063.3	2231.01	2233.01	2250.9	2301.81	2415.32	2303.89	2241.7	2290.43	2459.69	2523.7	1861.38	2169.01	2125.04	2087.94	2244.06	2230.25	2177.27	2035.83	2187.96	2429.14	2312.48	2167.81	2262.09	2147.77
349	2032.61	1956.24	1891.47	1800.38	1897.36	1893.86	1894.59	1920.97	1907.85	1754.67	1989.21	1952.88	1997.82	1925.88	1893.19	1916.29	1833.62	2057.81	1833.14	1954.49	2179.84	2025.2	2095.2	2041.31	2232.69	2159.47	2134.74	2253.63	2340.86	2246.06	2068.53	2007.92	1991.92	1830.59	2112.86	2007.77	2220.54	1851.53	2138.28	2365.07	2126.69	2103.62	2204.03	2221.99
350	1890.49	1859.37	1784.21	1774.33	1803.92	1818.84	1623.74	1831.23	1839.03	1799.6	1820.57	1680.56	1655.5	1723.4	1842.71	1747.83	1768.05	1906.15	1970.76	1856.36	1981.33	1912.01	2053.63	1890.3	2180.11	2041.11	2066.73	2016.82	2085.3	2169.81	1809.23	1844.2	1902.38	1777.91	1891.18	1853.97	2040.75	1874.35	2077.12	2200.95	1670	2128.27	2129.82	2046.35
351	1883.79	1620.35	1649.65	1659.56	1661.56	1672.98	1513.68	1781.48	1734.71	1582.6	1639.66	1599.25	1688.16	1735.39	1765.25	1681.93	1648.2	1702.92	1509.41	1797.82	1773.3	1921.89	1748.85	1882.31	1694.42	1865.68	1888.56	1989.55	1812.47	1896.94	1620.83	1639.48	1622.58	1851.74	1749.88	1784.35	1994.66	1753.17	1827.9	1984.42	2023.45	1865.41	1870.01	1997.1
352	1682.72	1586.18	1538.85	1525.53	1534.35	1562.21	1681.78	1631.67	1501.14	1435.08	1657.66	1439.73	1435.11	1516.41	1557.39	1594.9	1573.73	1514.85	1617.16	1595.41	1590.95	1649.92	1795.69	1696.82	1816.59	1775.43	1677.8	1654.05	1721.22	1818.65	1732.99	1678.17	1715.98	1647.93	1687.02	1664.14	1759.65	1629.24	1793.14	1941.61	1853.67	1754.21	1884.98	2053.85
353	1553.76	1319.33	1384.68	1420.54	1511.91	1465.21	1481.28	1363.91	1527.51	1423.63	1424.71	1399.08	1348.3	1515.42	1490.55	1501.57	1377.85	1502.89	1497.23	1507.59	1594.76	1337.18	1529.71	1661.17	1430.44	1570.16	1659.6	1658.95	1548.56	1761.88	1388.79	1563.08	1564.4	1520.78	1662.68	1624.18	1735.72	1680.39	1727.91	1866.02	1628.76	1708.9	1739.93	1887.23
354	1353.97	1295.69	1398.97	1280.72	1338.95	1391.76	1285.55	1306.6	1405.81	1270.64	1411.39	1397.28	1226.81	1316.68	1436.82	1278.83	1279.2	1456.3	1392.82	1338.58	1405.46	1387.97	1479.2	1517.71	1449.48	1527.96	1543.66	1644.42	1565.76	1577.46	1346.37	1441.44	1468.75	1347.15	1592.28	1578.17	1627.75	1558.8	1674.66	1742.83	1595.21	1559.17	1645.12	1771.26
355	1559.81	1228.58	1186.89	1155.84	1184.02	1401.95	1234.47	1257.47	1329.34	1049.79	1305.39	1257.87	1228.55	1249.5	1215.57	1273.3	1291.53	1364.64	1339.15	1371.82	1413.7	1411.5	1486.39	1407.35	1479.68	1482.35	1342.83	1452.27	1471.7	1568.6	1366.89	1438.04	1418.07	1403.55	1526.99	1549.3	1626.58	1661.7	1605.12	1860.6	1687.98	1719.56	1717.38	1827.94
356	1301.27	1141.83	1302.79	1156.03	1264.32	1249.3	1181.78	1225.66	1112.92	1185.28	1189.24	1109.87	1210.91	1220.59	1242.26	1223.34	1156.82	1289.78	1232.76	1319.93	1231.49	1362.05	1385.22	1400.91	1380.31	1295.26	1440.1	1393.24	1505.29	1466.98	1256.57	1380.06	1353.56	1432.68	1643.12	1582.66	1543.27	1667.84	1737.29	1744.14	1727.04	1799.47	1755.36	1943.24
357	1194.54	1080.93	1071.06	1076.99	1286.82	1225.92	1151.71	1213.84	1167.82	1125.92	1201.84	1077.04	1128.63	1249.94	1185.23	1071.32	1235.01	1276.25	1215.43	1190.91	1299.72	1166.28	1321.45	1320.84	1416.12	1274.95	1277.86	1275.66	1376.45	1428.69	1248.18	1482.66	1367.48	1440.73	1536.85	1680.63	1685.49	1620.66	1683.78	1952.88	1807.07	1882.83	1869.62	1811.23
358	1228.43	1086.74	1069.97	1087.43	1202.96	1029.22	1135.53	1048.29	1263.19	1072.91	1137.63	1009.34	1132.28	1117.43	1141.2	1247.32	1153.06	1061.55	1245.66	1114.75	1224.57	1227.08	1266.39	1217.81	1289.5	1172.78	1212.54	1322.45	1343.26	1254.55	1223.45	1351.87	1360.12	1462.54	1545.88	1616.42	1810.96	1709.08	1880.07	1962.72	1907.4	1941.12	1931.46	1944.04
359	1190.31	1116.65	1049.49	1149.57	1214.78	1097.07	990.563	1031.91	1064.06	1033.93	1076.6	1107.15	968.13	1069.03	1027.91	1062.19	1043.36	1003.08	1002.12	1095.84	1114.14	1177.81	1213.69	1268.09	1293.44	1190.66	1170.89	1270.93	1230.5	1310.54	1256.45	1349.19	1486.59	1547.23	1772.98	1718.22	1914.83	1866.02	2024.44	2154.56	2080.62	2138.35	2284.17	2396.29
360	1076.39	995.636	989.421	1039.15	1072.72	934.906	1032.55	1004.82	1053.77	941.297	982.557	953.75	1089.99	1027.85	1011.38	1075.56	994.158	1063.61	978.702	1149.96	1111.84	972.934	1143.3	1150.29	1229.75	1158.42	1181.86	1219.8	1298.85	1204.51	1210.05	1498.5	1660.68	1684.7	2010.95	2002.45	2252.7	2241.59	2314.91	2681.99	2476.45	2515.18	2667.63	3013.22
361	1167.25	1014.53	952.635	977.516	967.044	948.251	1018.54	910.362	947.928	932.177	966.739	1062.67	953.584	971.683	1109.45	954.466	999.629	985.504	1023.36	984.113	1140.05	1095.31	1193.13	1101.01	1146.66	1164.35	1109.35	1272.49	1238.31	1197	1468.05	1662.25	1811.56	2001.09	2282.92	2419.93	2740.34	2629.47	2830.59	3341.27	3039.7	3154.52	3599.84	3596.46
362	1065.14	1056.97	978.236	837.25	973.922	949.1	896.215	983.973	1106.91	968.091	939.372	849.05	927.93	918.715	867.677	954.015	923.068	959.944	1007.93	1022.92	969.978	1166.92	1178.23	1138.43	1116.78	1112.94	1090.48	1095.91	1273.73	1152.67	1550.35	2081.94	2241.07	2488.62	2816.45	3156.52	3581.01	3253.53	3880.57	4019.29	3856.51	4256.65	4499.52	4514.06
363	1096.43	928.604	858.849	863.824	1004.14	847.61	906.05	974.839	1011.4	950.156	894.185	935.728	890.333	911.495	1009.9	896.823	1007.56	1019.97	948.301	1023.28	1003.11	1062.77	1153.1	1034.34	1172	1051.45	1161.31	1128.91	1255.28	1215.6	1792.69	2205.01	2431.85	3028.79	3413.24	3633.39	4280.22	4152.75	4738.65	5026.86	5021.22	5311.17	5540.43	6079.77
364	1075.57	928.205	978.342	886.842	956.179	858.255	957.409	945.735	980.705	874.029	1010.7	899.189	1012.02	918.742	1020.77	936.938	920.488	939.473	967.684	1036.85	1075.46	1120.43	1144.32	1046.81	1196.69	1192.63	1266.82	1184.99	1161.81	1336.47	2083.87	2526.04	3015.79	3467.77	4082.69	4298.67	5034.89	4958.6	5559.2	6298.6	5630.14	6038.44	6811.42	7084.88
365	1065.32	978.71	1004.69	1004.64	1090.68	1125.21	1031.54	1103.51	1058.65	1007.63	1040.42	926.543	989.442	1078.34	1065.08	1025.37	983.094	1064.14	1061.64	1052.27	1181.53	1103.33	1296.54	1182.88	1260.24	1209.83	1096.93	1153.62	1288.97	1365.95	2242.23	2831.09	3432.97	3906.32	4566.99	4862.45	5877.1	5679.95	6143.34	6818.41	6456.34	6842.61	7823.8	7717.8
366	1257.48	1307.36	1285.04	1167.17	1195.78	1260.9	1297.3	1233.92	1318.38	1134.46	1217.75	1107.62	1180.35	1291.38	1337.33	1186.29	1194.11	1169.99	1261.33	1339.52	1384.92	1419.51	1426.07	1311.08	1428.82	1479.44	1538.29	1443.36	1575.35	1551.63	2591.21	3352.7	3774.39	4398.55	5034.12	5533.75	6330.26	6476.3	7189.54	7500.77	7257.84	7925.58	8486.44	8919.49
367	1575.86	1526.24	1527.76	1518.5	1536.82	1541.28	1565.88	1600.35	1623.21	1418.72	1663.67	1601.91	1532.52	1574.41	1569.08	1573.22	1637.38	1608.97	1579.85	1623.3	1817.01	1668.04	1785.47	1848.6	1933.47	1745.11	1832.92	1847.44	2022.11	1920.79	3509.03	4448.12	5015.83	5643.16	6458.61	7459.18	8500.84	8078.58	8853.94	9949.9	9222.86	9649.88	10827.5	11036.8
368	2103.98	2311.51	2095.3	2208	2163.96	2143.9	2111.61	2254.36	2224.42	2104.52	2038.83	2116.7	2082.11	2112.58	2169.18	2100.33	2377.14	2178.17	2233.12	2423.35	2438.3	2506.09	2385.75	2518.83	2641.13	2515.73	2576.48	2702.09	2566.56	2740.5	5350.34	6771.45	7767.72	9654.63	10730.1	11476.8	13264.1	12821.3	14222	15791.9	14687.9	15317.2	17099.9	18022.6
369	2953.36	2889.8	2960.48	2869.47	2918.46	2888.9	2954.72	2945.36	3058.28	2881	3204.34	2923.75	2788.25	2892.69	2937.21	2860.42	3046.18	3090.32	3300.25	3295.03	3532.79	3438.31	3561.17	3468.63	3673.69	3550.07	3612.45	3767.18	3631.87	3808.47	8681.66	11676.8	13069.4	15967.9	18976	20120.1	23198.9	22116.4	24655.7	27646.7	24894.7	27374.3	30141.2	30952.3
370	3752.08	3650.08	3649.57	3978.61	3838.62	3892.39	3842.15	3995.44	3901.4	3892.5	3862.8	3841.39	3735.12	3946.07	3892.09	3736.03	4226.79	4283.51	4464.58	4661.45	5025.21	4453.7	4864.29	4978.7	5112.71	4967.81	5162.53	5322.96	5472.3	5407.35	14053.9	19136.9	21856.4	26931.4	31542.2	34614.5	39783.7	37791.3	42211.4	48332.5	43424.2	46351.9	51422.2	53388.1
371	4892.15	4597.34	4534.22	4741.05	4652.65	4678.27	4617.3	4708.41	4767.65	4419.07	4744.05	4814.86	4645.09	4462.25	4747.08	4822.71	5191.1	5181.04	5491.09	5553.73	6193.04	6227.94	6531.72	6191.87	6473.37	6493.11	6607.13	6495.53	6616.51	6973.9	18858.8	26551.8	30629.8	37466.6	43761.1	48327.1	57635	54667.6	60129.3	67908.4	62310.7	67556.1	74005.8	76758.6
372	5390.26	5150.86	4968.25	5228.14	5407.45	5199.73	5256.95	5401.92	5458.04	5588.96	5426.7	5427.51	5425.45	5405.08	5220.92	5188.22	5914.86	6009.54	6390.78	6298.94	7021.06	6828.02	7497.24	7049.65	7647.58	7246.67	7572.88	7712.6	7487.06	7944.56	21965.5	30448.6	35734	43938.6	53026.1	58098	67663.4	64647.3	71705.1	79902.3	75424.6	80468.1	88710.2	92759
373	5736.14	5320.59	5416.72	5390.97	5593.86	5497.31	5369.02	5667.98	5749.08	5373.29	5560.9	5469.8	5683.68	5492.98	5767.32	5570.81	5959.08	6231.68	6692.72	6507.7	6845.4	7108.45	7684.87	7293.96	7836.33	7473.75	7515.2	7933.54	8244.71	8241.24	21414.8	29563	34571.4	42870.7	50984.9	55870.1	65580.3	63442.9	71268.8	78507.6	73906.6	80863.6	88286.4	91164.6
374	5335.82	5268.33	5154.5	5350	5099.63	5269.61	5172.46	5140.51	5071.38	5135.97	5046.72	5228.5	5305.11	5298.16	5435.01	5231.92	5373.88	5681.12	6027.32	6193.85	6683.48	6639.44	6843.9	6756.12	6933.38	7162.29	7013.52	7324.8	7164.47	7534.14	18671.2	25161.1	29607.2	37126.5	42893	47224.4	55444.1	53744.9	60913.8	66210.8	64048.6	68800.2	76637	79530
375	4642.8	4449.87	4550.35	4539.56	4670.86	4511.81	4570.39	4602.1	4476.85	4646.31	4771	4541.33	4640.98	4770.73	4766.06	4628.93	4763.94	5202.25	5180.99	5542.75	5679.13	5789.1	5963.17	5655.84	5963.9	5965.66	6089.71	6119.69	6063.78	6386.45	15640	21090.6	24962.2	29991.9	35308.4	39440.9	46056.3	44415.8	49482.5	53923.3	52318.5	56079.1	62083.1	64812.3
376	3599.13	3546.36	3643.46	3516.73	3699.27	3747.13	3821.51	3666.84	3823.04	3856.32	3787.91	3760.19	3679.68	3691.43	3658.78	3768.05	3930.49	3986.87	4458.06	4507.61	4567.57	4477.28	4707.31	4826.71	5104.3	4868.53	4838.18	5207.28	5159.29	5465.43	13042.7	18103.1	21539.7	26406	31102.6	34398.9	39292.1	38198.1	42837	46886	45058.1	49095.8	52773.6	55066.8
377	2991.33	2574.35	2668.8	2621.42	2794.48	2733.08	2797.37	2866.62	3082.13	2767.68	2887.16	2895.01	2835.03	2705.22	2833.86	2649.37	3212.49	3407.24	3415.4	3635.49	3763.55	3864.19	4086	3838.7	4088.53	4082.47	3889.74	4168.32	4316.7	4530.33	11856.5	16699.9	19962.5	24476.3	29120.3	32038.1	37017	36141.1	41461.4	44763	42396.8	46458.8	50097.6	52483.9
378	2144.78	1901.89	1982.65	1914.23	2009.72	2001.21	1974.93	2043.98	2124.7	2110.47	2090.95	2091.41	1942.82	2311.67	2060.81	2088.64	2368.78	2447.95	2580.33	2703.31	2948.08	2975.72	2918.33	2985.13	3170.45	3227.46	3155.23	3414.6	3546.47	3671	11352.1	15990.5	18491.7	23700.9	27627.2	30963.5	36639	35386	39870.4	43570.8	41715.9	44624.1	50420	53021.7
379	1535.18	1391.57	1396.93	1503.92	1390.5	1529.28	1459.6	1545.58	1541	1471.63	1539.26	1413.99	1559	1588.83	1530.3	1505.57	1612.31	1858.54	2039.29	2192.01	2287.69	2511.55	2490.16	2590.75	2654.41	2746.1	2515.16	2929.51	2884.97	2982.16	10379.9	14966.5	18065.6	22782.1	26816.7	30213.7	35194	34079.7	38979.8	42464.9	40037.5	44733.7	49326.3	51505
380	1290.08	1100.75	1120.4	1133.1	1144.49	1081.17	1088.48	1203.5	1242.82	1128.52	1147.42	1101.6	1101.17	1160	1079.25	1124.87	1381.84	1479.32	1544.69	1810.45	2029.28	2097.29	2076.72	1983.5	2446.42	2420.89	2337.36	2546.53	2433.51	2690.26	9950.08	14315.5	17067.3	21937.1	26299.3	28687.2	34690.1	33485.1	37826.1	41377.7	40020.6	43627.6	48520.6	50528.4
381	1081.29	1025.67	929.985	970.246	1008.06	973.658	985.292	987.377	1039.15	1018.3	1008.43	923.445	942.18	1038.38	949.707	993.678	1156.81	1286.81	1545.78	1658.05	1824.9	1871.4	1974.45	2018.14	2161.65	2169.93	1999.03	2230.05	2349.4	2488.23	9930.82	14564.7	17150.8	22054.7	26246.4	29732.6	35045	33596.3	38550.6	41833.8	39656.2	43854	48803.9	50883.6
382	943.301	822.105	828.794	847.185	887.312	851.71	816.427	883.204	897.567	791.795	874.837	896.462	936.038	896.44	940.987	960.7	1098.56	1271.08	1455.34	1622.31	1836.14	1872.34	1907.48	1834.61	2093.36	2160.89	2062.52	2242.99	2403.68	2465.03	10427.1	14971.4	17770.4	22922.2	27728	30516	36115.7	35603.9	40049.6	43339.2	41481.1	45464.7	50666.3	52658.4
383	938.841	684.41	734.408	854.239	783.361	831.381	790.207	814.811	972.952	872.799	898.735	974.23	877.691	897.655	936.383	837.34	1100.41	1237.35	1446.47	1598.42	1833.72	1965.68	1919.49	1864.34	2093.47	2105.86	2030.82	2301.4	2390.37	2485.38	10176.2	14987.5	18485.9	23309.5	27875.2	31591	36561.7	35534.6	40957.8	43849	43245.7	47086.5	52854.5	55328
384	915.127	751.357	837.469	789.081	801.346	802.996	731.163	826.468	986.339	842.259	891.161	791.873	820.065	837.18	905.557	786.912	1120.28	1056.94	1499.65	1549.41	1682.8	1843.04	1775.57	1802.99	1990.33	2019.6	1995.99	2239.85	2166.6	2427.06	10265.5	14262.7	17705	23071.4	27180.7	30534.3	36010.6	35210.1	40788	43543.6	42732.3	46685.3	51657.5	53837
385	801.741	778.059	677.959	743.741	892.902	772.756	753.435	866.969	863.878	786.34	791.627	867.011	864.256	780.76	824.753	794.189	979.976	1146.27	1294.89	1471.68	1703.12	1811.58	1832.61	1771.48	1974.22	1893.57	1808.18	2140.77	2210.96	2251.08	9568.34	13864.1	16968.1	21705.4	25830.9	29203.6	34012.8	34050.5	39265.1	40975.4	40842.1	45303.6	50507.6	52599.5
386	741.376	767.958	639.035	665.16	746.856	690.371	815.109	843.397	859.915	748.383	813.566	698.513	777.361	775.38	857.191	805.393	921.055	1171.12	1329.16	1352.51	1633.48	1765.91	1882.78	1697.5	1942.16	2025.47	1895.12	2110.27	2194.15	2290.07	9469.54	13694.2	16640.4	21375.9	25424.1	28959.4	33708.5	33731.2	37923.2	41211.4	39871.8	43644.7	49281.4	51235.2
387	826.119	696.871	675.235	686.604	716.181	727.706	729.581	693.72	815.909	757.731	869.776	705.938	768.568	770.551	791.182	791.7	937.537	1199.68	1369.28	1494.01	1736.74	1747.25	1749.76	1725.01	2034.42	1863.65	1819.43	2084.91	2113.93	2332.8	9946.71	14227.7	17406.8	22035	26823.1	29628.6	35863.2	34725.7	39141.8	42450.4	41284.5	45404.5	50256.8	52606
388	800.224	655.47	666.212	744.69	697.123	793.341	770.382	736.343	901.417	640.934	846.994	821.348	785.962	776.057	850.198	787.525	892.369	1201.04	1366.74	1582.23	1773.55	1908.79	1892.34	1888.11	2116.78	2099.01	1858.04	2226.71	2111.66	2421.06	10542.1	15156.4	18610	23852.3	28069.8	31860.4	37541.6	37127.3	41662.2	45115	43816.1	47845.4	53443.3	55899.2
389	757.502	688.554	676.08	772.923	698.68	667.757	664.785	707.738	887.338	739.299	851.548	760.615	802.054	722.17	850.383	770.224	962.941	1200.5	1369.53	1642.83	1799.55	1782.98	1958.41	1825.1	2071.34	2146.32	2037.84	2294.08	2387.68	2491.59	11098.1	16399.1	20093.2	25268.2	30392	34058.6	40022.8	39568.4	44296.7	48006.7	46574.5	50894	56880.7	59082
390	789.967	705.63	671.293	722.888	721.66	804.906	735.146	767.677	943.081	732.302	802.791	795.346	758.254	834.81	835.481	730.344	1006.18	1192.87	1509.7	1693.09	1788.64	1903.05	2056.63	2007.47	2393.24	2306.9	2227.69	2476.72	2450	2661.19	12220.1	17791.5	21514.3	27535	32816.8	36813.1	42975.8	42017.1	47955.8	51944.6	50368.1	54781.8	61197.4	62787.3
391	793.316	747.596	649.241	736.034	719.039	742.115	839.513	838.893	888.851	828.215	869.781	763.541	902.275	843.299	816.45	827.597	1065.53	1261.66	1569.71	1714.24	1886.03	2092.05	2110.19	2092.07	2354.61	2295.8	2223.15	2540.44	2534.03	2757.89	13149.3	19046.7	23236.5	29752.7	35926.5	39544	46250.2	45147.7	51127.7	56644.3	53550.5	58583.4	65221.5	67955.3
392	873.558	664.025	711.112	755.391	766.428	799.467	709.576	806.464	945.365	795.807	883.522	830.338	844.585	871.599	954.374	803.73	1055.11	1406.92	1660.04	1815.39	2169.15	2096.07	2292.53	2184.53	2602.68	2408.9	2437.81	2769.34	2787.01	3010.74	13692.4	20147.2	24360.6	30872.8	37559.6	41710.2	49145.8	47498.7	54266.2	59680.2	56354.7	61789	68650.8	72177.3
393	796.582	763.172	715.061	733.631	826.78	797.822	787.425	804.631	930.178	840.179	864.898	824.797	871.109	825.158	833.136	806.002	1265.78	1361.9	1664.98	1838.19	1983.94	2207.79	2303.67	2320.36	2578.21	2493.88	2391.49	2742.38	2688.14	2913.92	13802.5	20619.7	24562.9	31119.5	36906.4	41419	49525.2	48340.8	54968.8	59703.2	56906.7	62616.9	69735.6	72038.7
394	829.318	726.792	671.812	670.526	737.369	753.352	682.652	818.098	923.768	788.994	853.585	931.833	795.716	798.557	816.565	846.029	1171.06	1233.5	1651.91	1715.39	2042.89	2037.01	2190.93	2223.19	2450.83	2350.68	2259.74	2684.73	2617.79	2806.75	13064.2	19037.2	23037.1	29740	35567	39745.8	46940.1	45544.1	51867.6	56462.3	55016	59425.8	66654.9	68888.1
395	818.539	680.227	736.022	712.919	746.952	742.401	744.332	852.247	793.884	738.506	873.865	826.837	780.848	742.077	759.972	724.484	1112.08	1199.94	1584.96	1613.05	1928.85	1904.65	2067.75	2015.25	2275.91	2159.97	2127.05	2372.54	2496.46	2494.65	11761.5	17144.6	21271	26923.8	32583.2	36508.5	42964.8	42191.9	48165.2	51773.6	49683.7	54759.3	61502.5	63322.4
396	675.532	690.979	699.509	694.937	697.849	744.566	758.133	709.066	792.746	735.04	865.678	717.531	713.365	775.346	737.693	723.04	939.415	1165.19	1412.62	1528.93	1707.18	1829.96	1838.89	1804.05	1994.29	2061.09	1960.55	2221.26	2218.94	2460.4	10505.5	15194.7	18570.2	23936.1	28507.8	32128.5	37166.5	37126.8	42007.5	45446.8	44181	48216.7	54369.3	56534.2
397	633.126	622.104	578.201	678.92	703.423	720.566	724.881	731.98	854.019	701.387	775.418	675.128	718.857	760.063	774.963	741.93	965.956	1010.4	1239.59	1403.29	1630.14	1674.49	1739.42	1640.12	1837.96	1953.73	1868.7	2100.47	2223.67	2280.3	9335.58	13596.9	16237.2	21108.7	24929.8	28712	33298	32729.2	37863.9	40331.2	39665.4	43424.6	48291.4	49872.3
398	695.755	563.67	601.351	622.402	659.721	736.057	719.591	786.204	804.085	711.565	731.049	711.175	709.931	750.872	730.896	658.566	932.334	979.835	1255.37	1299.66	1485.94	1491.31	1710.18	1531.33	1820.94	1832.12	1731.4	1963.73	1959.29	2047.9	8421.34	12354	14822.6	19227.5	22884.6	25438.8	30537.3	29927.8	34028	36843.2	35256.9	39127.3	43277.2	44868.6
399	783.18	621.206	656.27	701.029	723.981	720.26	668.303	712.941	860.833	695.564	714.688	753.662	769.953	745.874	797.688	677.674	901.309	1015.3	1109.36	1321.33	1424.19	1577.57	1479.35	1537.53	1744.96	1695.76	1671.56	1804.24	1820.03	1981.06	7750.16	11378.7	14015.7	17730.3	21343.7	23446.2	28010.7	27072.6	31275.2	33689.5	32498.6	35966.8	39979.8	41338.7
400	788.044	755.988	675.055	691.66	641.446	659.029	693.583	682.047	765.817	645.468	819.383	681.036	734.861	659.413	803.201	694.19	803.631	996.415	1119.47	1265.42	1361.79	1399.29	1458.46	1479.51	1724.1	1525.27	1607.19	1863.76	1891.34	1964.65	7480.48	10687.1	13098.3	16460.7	19936.7	22199.9	26168.7	26008.2	29237.4	31787	30773.9	33372.4	37866.5	38736.5
401	753.577	710.578	697.978	677.32	646.813	731.205	714.492	739.559	867.11	699.143	790.412	645.932	788.352	722.767	742.678	735.397	886.157	974.753	1129.51	1157.24	1427.34	1466.66	1545.96	1505.29	1636.71	1625.37	1620.23	1683.89	1836.71	1931.42	7302.58	10275.7	12681	15721.6	18820.7	21301.3	24952.4	24433.9	27676.6	30410.2	29012.4	32709.6	35874.2	37090.2
402	742.14	742.057	729.445	727.63	776.393	737.025	660.364	836.991	948.411	739.219	868.13	747.738	844.151	789.67	708.428	815.977	919.224	1037.31	1241.53	1260.11	1475.7	1473.21	1407.29	1409.56	1554.76	1485.08	1553.28	1666.26	1648.3	1891.53	6903.09	9630.9	12075.3	15272.2	18302.3	20351.4	23878.9	23539.2	27010.9	28642.5	27862.2	30410	33772.7	36018.1
403	899.094	702.026	813.014	798.573	793.898	800.765	803.375	836.469	957.997	876.589	961.325	851.968	867.727	818.382	963.316	862.189	921.209	1060.29	1266.86	1305.25	1380.21	1483.83	1614.98	1566.2	1701.43	1730.63	1550.2	1768.7	1856.28	1918.55	6563.13	9614.05	11412	14567.4	17221	19828.5	22539	22360.4	25325.9	27806.3	27001.3	29542.2	33141.4	34277
404	1050.7	885.771	874.581	880.044	902.451	861.186	972.115	964.94	1067.43	935.22	1030.06	924.115	931.905	964.12	905.236	997.953	1006.01	1192.23	1421.44	1435.4	1565.59	1625.26	1623.42	1714.94	1701.71	1761.29	1641.79	1894.24	1925.16	1980.82	6401.42	9028.16	10880.2	13995.4	17085.1	18823.6	22113.5	21780.2	24666.5	26534.4	25458.7	28385.5	32076.3	32574.7
405	1042.5	954.071	918.56	943.554	966.93	914.987	981.563	932.994	1087.25	915.127	979.107	935.954	1022.96	933.623	934.062	941.701	1082.61	1243.41	1376.28	1388.84	1564.38	1569.72	1680.41	1636.81	1822.46	1741.51	1724.45	1749.26	1915.33	1953.76	6242.05	8899.6	10856.8	13633.8	15735.4	18220.2	21745.8	20895.3	24101.6	25808.8	24848.9	27472.2	31273.8	31416.4
406	1018.25	881.934	913.673	905.027	911.911	953.038	903.555	945.959	1136.49	897.849	1043.51	1006.53	936.983	879.638	939.541	961.758	993.921	1089.91	1281.12	1342.88	1444.56	1578	1535.73	1594.65	1688.28	1743.42	1496.18	1806.56	1893.51	1888.64	6050.19	8523.88	10371.8	13188.2	15581.6	17218.9	20164.6	19926.2	22733.3	24764.2	23986.5	26793.5	29449.3	30470
407	848.765	798.619	726.783	736.361	820.015	811.989	808.514	863.074	980.126	780.966	878.993	817.498	910.265	862.116	768.017	806.972	940.924	1070.21	1104.18	1290.6	1377.31	1405.06	1467.75	1414.49	1616.47	1498.74	1596.82	1654.74	1772.74	1853.73	5772.29	8367.75	10155.5	12241.9	14662.4	16916.1	19659.7	19757.8	21992	23951.8	22982.4	25412.4	27867.7	29560.3
408	668.182	698.52	700.136	675.139	623.281	666.231	671.53	654.946	784.224	694.125	729.841	739.364	678.981	696.285	779.878	587.281	875.223	844.961	1068.65	1150.37	1151.08	1188.47	1396.24	1254.89	1469.9	1449.76	1358.05	1565.32	1469.58	1595.23	5363.12	7926.48	9511.99	12251.6	14113.6	16319.2	19137.3	18740.9	21331.1	22991.8	22245.5	24970.1	27591.8	28525.1
409	687.536	539.203	617.589	532.018	605.797	586.982	586.526	642.886	671.896	602.03	695.702	617.084	607.74	571.07	620.288	593.968	786.244	754.614	966.487	1009.64	1131.84	1115.97	1097.03	1166.58	1299.68	1247.55	1205.77	1348.05	1460.28	1562.76	5246.5	7762.49	9500.32	11956.6	13923.8	15890.1	18724.7	18249.8	20654	22567.7	21371.6	24020.1	26921.2	27603.7
410	444.222	396.548	402.82	378.614	406.245	426.937	410.617	424.58	502.333	413.112	512.486	500.497	420.87	499.645	426.657	455.133	601.513	656.333	737.224	857.348	938.03	946.197	1025.62	1011.9	1155.46	1027.77	1090.33	1166.99	1245.08	1311.98	4997.44	7311.9	9132.7	11527.5	13924.1	15783.7	18486.1	17902.5	20671.6	22480	21299.3	23433.7	26205.9	27192.8
411	461.972	433.929	332.901	446.034	352.82	388.98	410.511	414.326	541.254	438.382	514.097	397.198	400.683	494.656	418.505	426.781	556.145	585.939	753.057	771.71	1002.54	938.803	1022.09	965.239	1036.39	968.451	1050.56	1129.78	1246.66	1226.51	5091.91	7431.85	9015.71	11643.4	13715.2	15501.8	17990.8	18030.1	20639.9	21771.1	21587.4	23703.3	26148	27082.2
412	414.693	359.034	394.591	380.835	414.652	448.426	452.872	451.718	574.729	432.15	474.915	433.086	443.373	401.103	452.674	454.64	551.914	635.694	724.052	778.261	846.994	927.882	991.144	969.524	1068.19	1076.55	1048.86	1118.85	1190.43	1250.03	5015.86	7347.29	9268.48	11209.2	13954.5	15397.9	18156.6	17920.7	20205.5	22218.5	21373.9	23409.2	25995.4	26889
413	395.646	409.106	385.27	383.267	425.244	383.929	402.147	495.624	555.085	409.156	585.265	439.324	445.917	419.46	464.788	409.982	510.805	654.51	814.348	714.204	936.508	1000.87	942.951	996.214	1186.29	1050.89	972.619	1191.02	1177.1	1196.29	5251.86	7536.21	9224.13	11322.1	13722.7	15307	18126.3	17700.7	20224.3	21861	20835.3	23413.8	25656	26836.1
414	426.163	364.83	391.995	403.775	420.046	345.677	418.124	418.134	569.596	394.319	555.253	438.213	438.287	382.957	461.546	442.38	587.83	649.472	696.316	802.494	950.751	970.768	865.224	914.852	1003.79	1003.02	1069.93	1155.84	1144.46	1149.05	4992.19	7400.21	9148.06	11589.4	13903.6	15128.1	18118.1	17652.6	20334.1	22050.2	20665.8	23306.7	25786	26745.2
415	445.794	373.269	367.496	367.424	398.946	424.534	425.859	439.929	567.668	412.475	549.195	479.57	475.655	434.528	403.23	401.624	581.059	583.782	723.487	897.178	967.016	923.836	981.315	856.688	1088.62	1000.26	1083.47	1135.81	1227.29	1213.62	5007.25	7321.44	9067.42	11281.8	13505	15261.4	17714	17359.3	19970.7	21886.1	20519.3	22715.1	25495.6	26573.8
416	419.912	375.181	437.695	404.841	414.977	383.413	404.36	443.618	564.785	455.613	503.64	424.439	385.969	446.159	440.497	434.776	522.016	563.386	706.382	723.591	941.438	987.446	919.751	877.031	1046.64	1053.13	953.991	1098.44	1097.66	1271.59	4751.61	7120.06	8624.06	11008.9	13180.6	15268.6	17207.3	17398.4	19780.1	20929.5	20137.9	22495.7	24996.2	25958.8
417	419.808	402.768	360.421	457.164	370.912	387.596	410.673	415.021	537.304	395.425	540.487	453.973	479.894	448.175	383.963	450.531	543.295	656.457	747.94	843.318	897.113	923.121	1017.23	946.379	1015.02	941.248	1057.78	1084.29	1177.7	1170.3	4927.19	6943.75	8322.48	10651.6	12332.3	14386.9	17346	16789.3	19025.3	20436.5	19896	22046.7	24221.8	25419.3
418	494.097	361.159	384.569	416.905	408.454	398.232	413.617	414.019	603.001	392.375	508.323	393.159	451.734	485.012	471.681	423.992	539.825	571.102	708.83	757.69	949.946	892.338	917.569	905.491	983.362	943.866	902.371	1156.52	980.257	1123.56	4300.18	6434.27	8050.06	10191.9	11891.5	13610.9	15870.7	15834.2	17903.3	19273.1	18604.6	20335.4	23128.4	24197.1
419	429.599	338.875	420.161	413.775	428.495	418.549	410.504	430.404	579.764	389.342	510.634	417.025	453.885	390.994	420.488	484.116	488.389	573.536	760.519	701.586	796.07	839.475	866.872	856.781	979.519	956.496	900.156	1004.12	1025.6	1055.68	4223.47	5967.77	7496.67	9404.7	11453.3	12319.3	14869.9	14726.7	16949.4	17940.2	17382.8	19445.6	21531.2	22077.8
420	436.475	360.845	399.747	391.67	423.314	388.244	353.468	457.748	543.557	390.166	488.082	406.125	444.285	411.298	465.498	383.018	556.69	564.257	705.012	654.849	797.922	728.145	802.743	755.035	901.096	846.916	882.993	976.377	990.168	1042.25	3679.38	5641.4	6801.13	8420.47	10238.3	11385.5	13271	13169.6	15335.2	15931.7	16184.2	17422.9	19751	19969.1
421	415.778	355.87	440.739	377.228	388.925	355.87	409.8	396.194	530.507	409.87	499.67	372.08	374.071	367.868	419.834	401.161	551.414	554.338	618.208	654.431	723.238	641.512	824.252	659.241	905.288	846.305	786.259	815.639	874.579	986.176	3306.26	4923.36	6287.88	7894.93	9198.82	10474.6	12162.6	12257.8	13746	14453.3	14471.3	15911.6	17701.9	18414.7
422	343.051	398.282	280.581	372.136	309.249	307.094	364.378	354.538	452.354	358.838	476.958	363.052	372.761	381.891	393.51	378.615	457.327	531.28	606.004	617.896	689.867	643.313	737.372	726.405	802.107	780.215	754.29	788.228	857.283	912.787	3100.9	4485.32	5595.19	6769.28	8086.95	9208.56	10715.3	10780.2	12561.9	13389	12963.3	14244	15754.7	16679.5
423	381.911	361.168	338.67	342.018	359.731	344.37	294.809	370.682	551.753	319.698	490.631	352.537	364.104	367.299	380.825	333.627	421.088	493.528	596.716	550.613	666.849	690.014	675.98	654.939	723.62	735.779	711.605	812.461	763.256	814.708	2715.86	4039.45	5125.6	6248.48	7697.16	8467.6	9900.83	9816.79	11443.3	12012.1	11691.1	12974.9	14003.8	14922.3
424	372.056	303.83	349.447	350.928	415.858	290.368	381.362	346.814	468.776	375.899	491.61	367.174	346.432	355.05	366.344	340.415	408.769	420.187	529.076	539.968	568.474	656.107	708.822	585.101	733.901	625.192	640.301	709.322	630.371	737.057	2669.75	3751.43	4672.2	5683.3	6563.08	7714.49	9087.67	8900.17	10395.5	10972.6	10487.2	11699.4	12998	13594.1
425	386.903	339.241	315.17	341.327	390.877	333.928	362.133	348.59	447.604	354.394	417.045	379.621	298.38	358.463	405.622	356.861	425.88	463.623	508.104	512.95	565.622	623.428	575.742	561.689	666.413	584.531	653.028	719.802	709.408	715.326	2434.35	3275.57	4302.6	5336.34	6236.6	7121.41	8235.14	8173.19	9625.29	9937.1	9606.58	10900.7	12078.2	12630.4
426	354.49	314.055	349.1	367.581	337.42	288.092	335.623	312.869	439.763	354.274	409.215	346.789	315.133	350.758	371.514	314.78	366.603	511.917	539.918	503.294	519.577	587.461	639.757	515.646	697.69	627.863	611.043	662.57	661.459	701.74	2294.36	3211.77	4070.3	4926.67	5978.74	6655.34	7683.69	7762.19	8750.61	9619.41	9495.13	10331.7	11425.3	11677
427	339.227	391.197	339.36	342.693	357.787	331.526	331.494	373.167	469.923	299.335	411.202	361.925	354.552	359.829	373.585	337.291	440.108	486.858	451.919	483.822	578.534	577.101	557.574	634.358	647.818	599.18	661.544	700.494	623.602	682.53	2064.38	3160.64	3947.69	4774.26	5440	6174.19	7177.5	7221.68	8683.09	9185.79	8737.92	9943.69	10538.8	11219.2
428	359.428	309.754	319.523	330.908	332.782	350.327	334.917	353.702	454.092	327.492	456.006	333.244	309.095	372.933	369.372	301.055	409.33	418.336	558.916	449.41	547.721	517.915	607.984	484.106	619.047	598.674	558.046	622.135	647.522	647.934	2003.77	2965.17	3637.79	4435.61	5169.92	5918.25	7050.6	6822.13	8237.8	8501.52	8210.41	9019.26	10092.2	10722.4
429	356.912	332.596	309.874	306.482	332.774	320.418	319.92	361.136	499.295	340.743	432.932	287.843	344.747	340.71	352.238	310.568	418.743	444.718	538.192	526.925	575.673	561.493	522.765	478.154	602.448	608.309	554.411	529.013	626.451	636.831	2000.69	2804	3516.31	4382.47	5118.75	5763.82	6746.08	6619.81	7877.98	8009.61	7869.18	8815.22	9773.28	10060.4
430	334.051	329.107	332.833	321.823	346.264	292.123	350.653	366.793	473.085	333.335	430	306.827	278.641	265.037	342.863	365.959	413.353	348.665	542.646	415.462	486.709	553.99	554.206	522.463	570.786	626.943	511.665	565.58	573.685	582.203	1996.37	2589.19	3457.45	4116.86	4947.61	5526.73	6309.99	6316.06	7476.39	7906.14	7429.18	8156.95	9237.34	9785.08
431	356.701	272.73	274.484	312.389	329.773	306.844	320.196	342.39	465.868	348.632	411.539	327.973	371.432	324.032	362.08	343.491	391.153	424.928	500.796	476.739	475.591	518.525	539.668	490.833	592.297	555.024	533.148	602.038	608.108	637.536	1807	2668.81	3349.79	3871.84	4534.21	5271.42	6071.49	5983.79	7282.43	7513.26	7142.36	7918.4	8787.12	9104.08
432	332.118	297.468	270.685	291.613	316.63	312.215	297.764	327.544	390.346	299.457	458.941	328.094	343.116	326.015	333.832	320.641	452.081	468.173	525.202	467.106	470.285	509.787	522.235	558.895	613.105	543.871	566.914	537.284	640.346	589.769	1666.95	2469.78	3054.41	3508.56	4437.77	4837.58	5563.93	5835.96	6705.49	7332.78	6709.63	7605.77	8472.02	8717.64
433	311.039	327.538	293.602	295.453	325.93	312.21	320.471	267.012	433.836	320.261	415.174	295.719	322.25	325.835	333.843	352.562	383.787	352.485	482.078	432.668	534.634	492.648	559.566	566.615	574.727	523.106	534.335	595.925	583.33	585.765	1741.95	2334.85	3036.14	3632.9	4237.4	4648.84	5555.47	5449.37	6504.5	6874.07	6457.37	7373.23	7926.21	8338.2
434	333.491	293.069	327.166	297.283	316.234	293.411	337.351	334.649	446.785	356.061	431.608	316.234	329.465	312.325	367.55	324.069	417.703	429.548	485.451	497.095	500.243	442.569	483.237	492.101	561.521	479.482	520.745	582.318	545.044	595.302	1665.66	2357.5	3014.16	3365.81	3972.75	4557.36	5376.79	5031.59	6095	6715.04	6398.33	6930.76	7654.42	8177.02
435	306.487	300.012	298.045	290.768	324.786	270.183	292.842	328.076	409.829	338.053	409.699	288.951	283.257	290.655	302.178	308.031	351.701	347.75	503.191	417.891	513.94	436.875	455.377	470.15	628.089	459.693	413.515	550.752	568.362	573.12	1599.64	2044.51	2986.47	3234.72	3763.1	4592.22	5151.86	5020.89	6053.64	6532.1	6133.14	6664.12	7574.76	7578.93
436	300.767	339.976	294.288	316.91	286.728	321.011	292.615	324.377	428.154	303.861	398.063	296.535	324.819	288.636	362.589	319.262	330.774	336.658	487.739	430.595	461.081	442.109	580.272	505.953	564.78	520.168	496.659	578.284	566.71	506.99	1470.93	2072.91	2718.91	3238.25	3792.47	4329.36	5006.31	4983.55	6003.6	6310.31	6039.32	6571.68	7409.04	7588.16
437	298.785	294.575	295.744	277.203	294.06	290.48	333.766	275.163	391.823	275.163	403.498	298.315	286.875	297.924	313.397	304.291	336.536	362.731	449.307	436.177	489.166	473.941	398.306	536.056	573.388	453.104	529.904	560.812	553.731	581.913	1566.82	1990.36	2790.84	3152.24	3763.75	4282.95	4992.99	4856.89	5938	6209.62	5900.44	6585.26	7021.57	7524.97
438	308.609	311.434	286.444	311.488	281.03	266.096	290.517	305.891	446.964	325.971	333.971	285.273	320.927	232.098	270.002	266.628	355.452	415.924	522.947	414.124	489.239	429.105	420.898	456.782	517.711	513.445	466.299	595.382	517.447	590.05	1433.99	2005.29	2997.02	3076.35	3678.83	4292.46	4899.99	4781.97	5743.76	5995.82	5838.76	6370.09	6999.7	7433.01
439	320.381	281.05	284.843	273.944	282.806	311.616	307.899	323.073	438.023	292.332	339.871	287.169	317.39	269.877	338.007	336.938	323.372	387.952	453.58	361.714	423.249	524.119	434.554	477.463	492.121	504.767	487.29	542.604	530.782	553.18	1452.5	2024.63	2908.81	3032.8	3586.28	3984.7	4780.05	4628.9	5644.19	5908.92	5593.16	6367.82	7009.07	7157.88
440	310.922	293.934	288.365	226.416	284.859	288.969	243.392	277.637	405.682	290.44	375.547	328.423	298.274	275.667	353.098	296.668	327.212	387.671	504.61	453.903	477.826	477.051	483.68	418.799	508.539	465.092	470.179	500.526	653.262	496.313	1455.72	1984.42	2514.85	2963.91	3498	3906.52	4495.12	4492.51	5606.86	5871.92	5589.51	6247.11	6722.02	7313.34
441	289.045	299.899	287.044	309.833	327.346	304.566	294.612	312.072	457.427	321.309	375.938	334.906	298.847	283.84	251.524	302.703	354	323.53	439.444	399.258	389.683	414.971	457.627	448.227	552.407	496.353	465.837	499.716	516.349	500.755	1413.96	2029.81	2637.1	2837.36	3420.87	3796.05	4641.58	4474.14	5488.76	5815	5286.05	5967.81	6809.01	6902.34
442	286.289	257.23	263.233	280.502	250.552	271.182	318.007	282.371	382.068	295.455	427.343	308.981	290.127	299.408	308.786	293.673	327.95	338.895	464.139	376.898	399.639	401.651	393.523	450.251	531.453	384.249	433.475	461.914	467.559	538.375	1317.18	1794.16	2561.42	2790.8	3252.44	3766.83	4307.17	4343.84	5241.19	5516.91	5293.9	5777.23	6493.68	6401.39
443	259.649	261.054	217.948	276.663	227.951	307.082	282.131	293.637	389.833	329.209	312.764	291.989	293.973	278.525	259.668	254.091	343.245	340.819	456.402	421.838	429.727	414.942	444.783	437.149	473.318	463.303	462.998	508.912	460.051	496.43	1219.64	1742.96	2527.61	2513.19	3190.68	3509.91	4101.44	4049.78	5173.1	5144.36	4850.13	5538.33	6428.91	6195.13
444	308.66	276.417	238.96	233.548	254.371	267.756	237.372	314.628	416.799	290.206	385.319	222.604	305.378	250.694	322.085	316.712	349.262	327.975	436.147	378.831	424.147	461.007	407.786	339.408	464.786	388.491	433.478	462.209	467.755	481.753	1211.87	1690.6	2455.65	2464.57	2923.26	3499.73	3640.93	3987.22	4945.93	5010.29	4769.2	5494.15	6008.13	6110.91
445	291.428	289.245	238.638	263.276	274.666	231.465	239.015	238.94	442.66	263.751	350.343	267.512	263.315	272.851	278.72	295.605	315.077	361.337	492.702	410.418	433.157	401.865	365.617	380.184	444.912	412.642	406.514	412.722	468.78	465.082	1183.01	1512.5	2338.23	2332.9	2660.5	3153.01	3540.53	3700.31	4772.54	4815.68	4521.28	5138.09	5451.87	6001.32
446	320.667	238.93	274.782	252.657	243.442	271.459	271.677	326.278	426.496	270.224	397.753	292.629	290.402	269.698	258.508	281.103	315.861	313.366	525.843	371.995	400.193	406.519	404.027	392.384	476.222	383.446	439.77	443.977	458.656	450.897	1057.18	1533.87	2048.26	2183.81	2495.1	3018.23	3504.21	3492.2	4448.99	4383.59	4200.86	4703.56	5271.7	5503.31
447	269.313	255.9	240.923	303.441	300.065	263.855	269.418	277.041	358.412	207.688	337.358	307.337	211.249	235.625	267.826	252.885	324.995	335.849	406.451	347.245	435.965	374.113	360.228	414.973	489.262	339.961	426.872	461.016	450.91	416.312	1043.91	1296.76	2020.19	2025.36	2365.36	2829.28	3168.59	3291.18	4180.42	4049.39	3987.41	4616.38	4946.61	5282.68
448	286.236	243.089	226.124	254.501	250.883	275.231	282.896	237.552	383.02	256.548	382.955	271.554	258.737	237.609	275.539	266.2	313.361	313.361	495.112	254.997	366.11	392.989	422.941	352.977	480.204	400.098	391.128	389.362	383.029	446.65	966.021	1310.43	1967.69	1816.04	2097.96	2659.41	3010.81	3023.94	4118	3972.7	3759.99	4215.92	4610.05	4799.91
449	280.696	252.561	254.631	267.6	260.328	279.07	231.997	269.491	356.787	269.57	319.211	220.627	258.812	311.564	292.553	281.51	328.583	279.593	449.441	353.373	375.446	357.257	368.67	368.499	416.544	373.804	388.926	404.365	437.982	435.692	896.95	1178.99	1792.53	1791.25	2231.82	2350.73	2640.47	2851.63	3785.1	3449.4	3449.65	3993.33	4335.73	4542.69
450	228.055	239.23	286.831	276.83	277.213	264.058	284.874	307.065	390.751	258.28	339.883	303.622	285.311	290.654	298.284	239.9	321.446	296.59	430.361	345.716	364.288	372.527	383.499	408.147	488.544	400.667	405.626	370.212	434.263	388.514	883.913	1104.63	1702.85	1554.83	2002.84	2320.54	2661.97	2591.96	3780.19	3388.32	3153.62	3718.63	3981.75	4436.6
451	275.394	256.531	239.841	241.271	256.681	252.79	266.215	301.626	424.801	302.117	338.372	313.386	270.478	271.694	285.456	283.476	312.173	368.654	444.08	325.195	351.588	346.355	380.034	402.879	463.937	401.027	360.574	340.105	428.9	411.615	787.763	1029.58	1716.78	1507.64	1811.75	2021.17	2402.12	2376.38	3462.42	3101.33	3005.85	3498.84	3937.23	4091.69
452	277.714	241.954	224.702	239.877	232.661	245.663	232.509	302.208	347.716	236.588	357.948	258.992	310.729	279.957	268.954	297.401	301.153	304.844	403.352	293.584	318.338	354.808	359.658	336.926	388.193	365.666	334.764	365.452	395.469	421.694	748.145	915.069	1603.84	1368.08	1666.23	1850.8	2244.96	2296.42	3354.52	3037.1	2851.82	3298.72	3646.27	3773.52
453	234.899	242.406	238.271	249.793	261.598	259.652	227.272	291.319	325.63	244.597	343.42	246.397	246.541	309.155	252.329	242.955	286.436	284.789	366.295	313.329	330.396	315.22	358.311	327.81	409.518	336.166	330.05	421.057	367.933	352.392	761.493	999.535	1566.13	1328.71	1563.68	1816.32	2090.67	2203.68	3293.55	2891.67	2875.88	3338.53	3445.57	3503.78
454	278.122	236.578	243.859	257.235	215.822	230.957	234.709	223.037	399.189	200.921	356.333	248.103	263.312	312.435	282.461	240.721	285.967	314.765	455.115	301.565	333.638	297.83	379.097	329.373	420.961	341.711	320.399	356.221	392.413	410.71	652.303	839.582	1458.56	1309.74	1511.73	1600.75	2105.57	2072.17	3179.69	2712.3	2608.12	3013.8	3291.38	3473.92
455	272.681	274.875	223.545	261.478	284.513	219.97	233.034	267.124	365.957	243.038	298.276	267.598	267.579	238.933	262.179	273.431	260.178	290.62	437.018	301.826	316.788	343.872	298.298	330.091	406.547	366.938	358.791	338.049	381.47	327.987	649.782	854.492	1424.52	1258.25	1424.36	1552.94	1970.72	1954.92	3117.89	2643.69	2455.52	2851.8	3158.98	3421.57
456	274.491	236.843	204.558	229.387	276.908	225.705	288.099	250.331	377.531	208.797	265.981	246.826	239.191	257.967	245.118	262.022	258.451	273.467	444.785	328.381	303.594	340.267	325.083	366.175	370.239	339.861	315.332	363.033	392.985	371.65	625.47	833.388	1319.53	1304.35	1460.54	1661.16	1825.83	1779.92	2984.27	2586.63	2458.91	2764.36	3120.87	3245.31
457	268.995	214.335	293.7	221.955	235.28	244.565	246.454	290.15	343.441	263.889	340.399	271.615	206.929	212.557	197.514	280.818	269.722	283.087	426.307	343.725	302.138	298.497	283.446	282.901	442.335	347.574	324.94	409.069	385.71	305.447	628.813	767.49	1350.77	1194.54	1393.15	1582.26	1805.85	1790.35	2923.06	2312.97	2278.37	2740.53	2968.28	3189.04
458	236.99	227.394	208.424	189.652	239.101	237.059	227.461	267.52	369.803	281.081	307.864	282.918	237.059	282.87	205.118	267.565	285.06	254.275	473.891	275.464	313.497	323.58	296.773	294.554	410.536	308.082	300.519	300.695	309.825	379.82	593.294	726.013	1261.05	1030.19	1318.9	1475.55	1800.51	1830.24	2783.16	2439.16	2170.56	2609.77	2974.56	3170.17
459	275.123	286.292	227.699	239.2	273.671	229.731	269.634	269.49	324.85	230.016	307.94	239.614	246.884	218.514	247.202	228.27	287.317	214.73	426.509	309.901	323.037	370.055	308.405	323.351	382.79	346.623	314.423	335.082	370.912	317.097	541.49	676.346	1304.58	1114.32	1219.8	1435.77	1618.09	1632.02	2790.47	2362.22	2205.6	2627.23	2797.9	3071.81
460	249.055	230.06	262.439	205.452	238.267	205.447	236.079	252.71	350.259	255.304	266.567	243.831	242.02	215.053	245.909	246.005	272.504	285.913	463.495	291.532	337.254	288.465	276.497	323.987	409.978	287.917	322.537	297.523	366.04	346.233	465.093	644.149	1169.93	996.039	1162.81	1336.21	1642.53	1646.75	2683.07	2224.95	2053.79	2616.26	2808.4	2966.91
461	261.027	228.676	224.772	262.799	238.878	243.963	219.206	276.049	337.461	208.078	327.992	282.349	249.905	236.546	252.101	232.821	255.697	223.209	441.231	282.59	335.889	280.831	328.096	324.454	427.485	324.47	309.194	351.808	328.696	327.777	560.229	698.168	1202.15	1034.95	1202.85	1393.49	1467.58	1570.77	2636.95	2288.34	2034.04	2412.3	2572.41	3058.88
462	259.288	255.314	263.325	293.663	217.937	244.089	217.387	255.624	353.24	227.363	326.485	215.884	257.82	204.441	276.797	223.286	236.985	290.322	464.325	338.302	334.008	311.749	336.08	337.981	349.609	330.754	290.223	321.727	353.86	333.821	503.821	700.041	1188.64	1009.93	1171.8	1368.51	1462.17	1483.34	2411.25	2171.2	2023.18	2483.53	2529.67	2938.4
463	263.337	303.152	284.542	255.921	242.659	271.068	206.185	233.077	395.639	241.276	361.245	219.949	241	280.948	256.164	295.978	254.42	302.228	396.141	302.346	273.289	262.48	291.028	281.043	461.106	283.583	275.234	339.109	344.369	332.486	490.859	575.721	1271.02	851.169	1102.04	1197.34	1312.35	1488.37	2524.08	2213.29	1980.3	2372.71	2591.4	2781.08
464	244.72	257.771	259.908	237.067	223.76	248.574	256.291	239.235	334.782	262.674	325.541	229.587	258.241	252.669	224.071	260.091	226.146	275.833	404.418	312.403	352.333	287.76	285.668	318.028	390.535	280.237	312.076	293.308	352.093	336.711	550.644	551.736	1206.12	895.601	1016.45	1295.76	1351.38	1490.48	2556.16	2098.14	1924.26	2290.95	2573.63	2708.35
465	283.31	246.939	229.672	214.517	184.055	220.413	243.501	258.55	360.336	256.891	289.609	253.125	248.968	229.839	253.18	239.731	226.686	320.444	426.228	337.541	289.609	297.708	299.366	287.768	385.703	299.563	291.732	336.032	348.759	358.271	456.406	601.719	1220.26	889.387	1083.22	1209.5	1385.81	1370.79	2372.16	1944.79	1789.79	2193.46	2407.2	2722.39
466	297.364	251.394	249.312	234.282	255.636	218.941	209.527	266.617	284.308	226.579	336.298	245.99	313.146	259.014	232.526	280.555	263.889	265.382	509.697	263.478	299.866	284.862	315.197	313.184	365.336	286.522	311.885	350.38	402.007	303.636	503.082	591.496	1132.49	848.241	1016.02	1256.23	1408.58	1512.93	2524.48	2051.06	1948.28	2307.19	2677.9	2582.41
467	298.385	237.042	269.346	300.471	277.641	196.586	281.525	238.662	321.822	277.52	316.464	296.633	289.111	269.713	258.317	260.403	247.388	293.273	470.597	334.157	293.152	337.987	331.684	293.052	433.488	322.23	334.124	336.244	347.551	302.839	512.346	572.826	1126.74	853.153	1046.31	1249.43	1432.32	1383.75	2509.54	1973.74	1847.11	2273.48	2443.63	2774.13
468	268.423	262.929	266.291	241.675	272.629	251.507	257.455	243.395	355.84	307.605	282.895	270.616	261.352	276.88	238.022	296.458	290.901	277.089	406.527	290.78	284.285	306.109	346.854	302.036	433.186	311.952	325.404	349.157	337.321	338.814	512.307	582.605	1152.92	816.17	954.534	1237.64	1298.31	1355.18	2429.8	1853.4	1813.6	2342.75	2465.58	2750.08
469	257.775	215.502	300.605	250.704	295.102	250.887	262.282	267.434	322.282	269.961	246.769	248.38	215.764	264.308	247.016	208.171	241.357	297.934	494.007	303.576	285.422	272.347	299.545	344.308	374.875	280.176	299.13	291.729	311.004	289.658	425.781	529.13	1149.45	875.48	908.291	1118.48	1232.19	1455.51	2213.5	1954.74	1778.88	2247.08	2322.6	2593.7
470	267.006	233.953	228.154	177.643	257.636	259.645	230.407	235.748	376.439	277.289	324.005	193.054	269.288	232.173	220.982	236.466	261.973	228.972	457.186	265.857	271.339	271.742	291.327	273.617	439.613	283.278	296.737	320.343	312.203	287.06	431.607	512.407	1087.03	757.422	941.923	1186.51	1231.24	1389.24	2340.41	1926.31	1811.02	2270	2442.89	2606.87
471	221.424	217.321	233.085	221.624	265.016	219.881	261.027	192.134	276.438	229.709	280.441	215.787	204.066	235.181	273.334	241.583	280.83	239.52	428.036	253.213	280.659	280.803	308.55	302.374	402.844	288.679	284.405	320.146	327.58	286.485	361.84	425.004	1046.41	841.685	903.499	1095.03	1161.11	1277.02	2133.25	1726.8	1779.29	2093.02	2418.2	2562.44
472	247.792	206.493	202.452	187.063	210.99	193.191	208.804	295.184	313.077	201.106	267.939	207.016	228.848	177.114	205.299	228.775	258.396	234.566	386.693	288.187	303.527	283.997	264.32	252.485	393.042	309.847	287.389	325.295	301.468	289.554	455.41	586.959	1043.54	719.489	821.234	974.868	1127.07	1316.54	2269.96	1730.68	1642.59	2177.39	2470.94	2554.06
473	270.223	189.367	226.841	227.26	197.69	201.688	235.096	227.034	326.283	231.353	269.054	288.718	229.504	246.77	227.52	266.842	255.349	280.931	374.098	263.44	292.488	265.201	272.792	263.376	370.337	289.267	266.855	306.359	243.105	278.749	474.015	492.451	1054.21	601.375	835.809	984.591	1129.54	1187.31	2192.66	1740.45	1743.71	2195.53	2325.15	2419.51
474	197.865	245.036	180.092	239.9	263.807	204.004	209.879	199.94	313.288	229.824	275.722	217.979	192.274	217.873	220.111	199.979	235.963	230.228	349.26	232.116	277.327	214.115	283.449	275.346	333.181	282.16	245.92	311.245	237.796	245.848	394.773	493.534	1057.14	725.024	793.026	942.358	1011.48	1175.97	2130.32	1560.75	1645.69	2003.88	2102.9	2436.58
475	198.314	227.972	170.757	208.523	200.775	178.66	164.66	226.297	319.938	186.646	254.478	224.602	208.609	198.632	216.788	202.447	236.602	238.876	352.204	260.278	258.385	266.355	250.563	264.007	344.069	221.073	226.589	240.479	268.362	298.275	348.477	402.245	961.422	673.6	762.953	946.292	1041.07	1191.2	2091.25	1654.46	1639.63	1906.51	2140.67	2299.99
476	190.911	181.095	183.17	261.04	205.385	187.325	197.169	163.462	291.05	189.363	263.231	193.529	197.183	203.203	199.636	175.317	215.559	237.462	341.527	225.303	237.249	231.386	237.382	241.177	273.401	245.815	253.155	199.514	281.26	277.102	343.89	409.872	939.568	582.798	735.899	947.68	1015.06	1152.89	2135.03	1582.5	1559.13	1922.5	2120.57	2231.06
477	205.671	228.067	159.907	209.985	210.322	174.229	196.024	190.037	262.575	218.542	288.597	132.264	211.99	148.141	188.321	238.441	162.336	204.388	333.085	246.39	252.418	216.421	260.558	244.232	380.871	252.916	242.614	236.495	226.303	260.197	361.515	383.661	957.929	617.317	749.307	890.239	959.712	1172.19	2171.62	1510.41	1501.29	1907.09	2139.12	2355.72
478	192.647	199.011	146.553	186.641	189.134	171.013	170.776	210.636	247.888	165.263	253.687	221.3	211.195	203.001	195.047	195.256	213.305	197.307	395.192	201.251	267.54	231.732	237.91	221.064	366.499	229.476	233.747	219.374	295.803	261.27	317.278	389.462	901.541	593.654	698.151	844.346	937.703	1026.87	1972.38	1543.06	1421.41	1797.13	1998.87	2267.32
479	199.521	217.834	179.389	157.122	183.845	175.751	195.571	197.439	290.877	191.93	220.253	189.795	218.126	201.777	179.599	177.754	234.283	195.966	329.834	197.996	280.51	258.891	222.772	199.798	327.26	205.977	252.756	224.207	240.278	284.45	298.513	385.238	938.496	622.104	670.299	777.153	965.498	1020.41	1887.29	1514.15	1448.72	1785.81	1966.21	2075.02
480	187.951	220.179	202.176	190.027	226.668	243.007	226.322	228.403	313.632	230.733	247.207	190.23	202.422	167.953	218.61	184.213	168.072	226.812	358.723	232.995	190.124	257.489	233.285	224.579	328.059	277.636	220.963	210.786	228.754	212.522	299.25	438.114	875.297	563.668	654.211	847.885	900.401	991.309	1928.92	1342.28	1445.04	1664.96	1920.39	2128.72
481	232.692	220.552	176.289	184.493	210.757	214.946	178.237	230.697	285.932	190.608	259.797	229.23	223.138	176.186	235.441	201.064	217.259	231.258	318.557	257.73	241.407	227.439	237.558	263.561	328.702	243.655	237.477	227.561	286.211	284.07	315.736	370.589	865.522	540.882	625.435	817.358	865.878	1002.35	1833.21	1250.28	1344.69	1770.92	1978.52	2145.63
482	228.862	194.691	172.66	209.198	194.928	186.852	201.02	216.837	255.899	209.208	249.879	213.452	194.971	178.576	207.389	181.168	219.791	211.316	367.807	262.439	215.448	272.438	258.257	269.991	319.169	217.677	231.72	223.698	246.032	266.197	318.235	298.67	856.414	539.768	642.466	794.683	872.256	983.331	1785.03	1447.2	1368.43	1633.69	1957.24	2040.3
483	221.089	179.023	193.231	185.131	171.09	205.54	237.563	245.792	264.473	189.246	256.56	179.411	219.726	176.95	203.634	181.459	195.76	242.418	342.246	263.052	217.999	230.291	228.258	211.66	322	222.394	262.892	252.776	232.436	248.312	280.68	333.689	813.066	544.527	556.619	776.628	762.355	929.07	1742.85	1416.81	1225.15	1480.47	1822.46	1870.22
484	219.702	185.741	195.499	181.65	198.055	185.601	185.11	197.517	246.71	185.777	218.596	212.43	144.891	205.992	208.29	208.259	196.075	232.998	281.797	184.004	238.92	206.393	231.028	198.132	300.35	224.987	236.821	208.416	243.425	212.203	285.483	334.391	772.195	499.017	523.6	742.134	851.198	929.446	1748.04	1410.49	1272.99	1562.13	1829.56	1998.73
485	189.881	194.247	157.118	179.934	180.039	167.682	189.835	173.547	255.26	192.334	257.64	181.873	202.471	175.948	207.054	145.33	200.508	206.898	333.799	235.738	221.027	196.679	196.67	192.465	284.644	243.908	165.69	198.515	237.84	221.011	287.919	271.954	778.354	479.728	516.893	763.221	771.958	792.041	1628.46	1310.89	1276.2	1536.36	1789.51	1985.75
486	194.766	186.406	159.614	161.782	151.731	104.681	192.341	159.788	286.319	196.83	196.639	217.169	159.889	168.097	199.39	172.453	190.781	184.802	297.89	219.72	198.905	203.416	223.729	242.173	279.005	213.81	202.882	231.759	213.654	223.658	235.794	301.081	793.154	466.74	536.843	624.192	713.513	867.08	1615.99	1326.75	1249.87	1579.26	1707	1871.08
487	168.105	145.912	174.522	164.077	150.011	129.601	151.933	153.99	225.381	147.974	201.277	156.245	149.982	158.158	152.393	181.029	152.096	228.255	323.209	222.178	191.157	240.951	209.896	240.628	279.684	205.8	162.317	209.758	212.052	217.973	230.028	314.223	682.982	386.141	486.758	636.119	733.411	815.443	1798.52	1220.83	1232.79	1495.51	1679.6	1808.43
488	188.771	179.146	160.414	180.932	168.796	187.455	125.528	183.25	271.319	197.952	218.312	195.766	162.661	179.141	175.351	216.442	164.764	208.044	334.59	220.774	168.998	206.426	214.406	154.53	321.782	169.047	179.194	218.429	200.229	173.044	234.894	284.643	686.708	446.473	534.979	576.517	655.5	813.308	1478	1139.25	1196.12	1403.3	1710.09	1824.91
489	152.28	175.379	175.205	146.422	142.463	169.325	171.161	146.554	208.033	188.097	251.812	140.501	161.042	148.741	152.943	169.556	214.874	210.844	360.122	196.461	223.078	173.81	185.763	165.279	264.943	184.093	216.94	210.983	242.5	252.149	248.168	244.485	727.503	392.124	501.297	658.14	669.539	844.276	1501.16	1155.89	1119.24	1397.71	1676.2	1666.28
490	210.595	155.195	163.262	175.811	167.815	169.771	149.038	186.108	235.696	163.619	215.481	161.584	167.913	145.11	198.94	170.031	141.025	194.847	252.986	165.957	215.492	172.201	217.532	201.076	300.936	174.157	203.208	203.257	220.118	225.913	236.581	241.08	704.831	395.13	436.553	612.861	623.821	819.547	1498.21	1136.61	1125.32	1485.31	1588.78	1757.79
491	167.824	182.708	172.297	184.78	199.502	186.888	149.437	168.101	213.856	176.612	224.592	211.78	160.2	166.369	185.139	141.441	197.645	174.573	359.72	204.105	210.02	193.573	228.963	212.069	268.427	149.874	178.942	208.123	208.108	255.742	245.662	256.189	703.354	423.108	425.573	604.525	724.268	799.421	1512.21	1134	1154.21	1313.84	1640.19	1714.82
492	149.717	152.28	177.226	139.699	160.511	158.426	160.328	160.534	233.431	171.071	231.667	172.921	166.939	158.457	169.141	171.279	170.979	177.399	284.17	173.44	187.834	150.413	202.497	166.829	342.567	194.459	219.225	192.12	200.4	189.921	248.486	275.685	699.537	408.207	439.82	587.573	681.957	745.06	1672.79	1146.38	1101.76	1272.78	1507.34	1723.07
493	190.076	148.767	194.537	182.256	198.73	165.332	169.213	179.785	246.748	198.851	178.101	215.617	163.275	194.679	150.892	172.008	154.955	219.9	324.915	186.596	186.469	228.517	201.091	199.016	312.437	201.218	205.395	161.453	213.794	213.826	257.623	224.783	631.283	382.529	458.202	631.023	653.173	754.516	1451.84	1007.11	1128.18	1326.77	1605.03	1741.99
494	163.131	140.728	148.938	168.05	170.084	149.086	153.189	159.426	241.343	189.144	191.148	176.53	165.961	170.18	130.388	178.975	163.944	168.357	275.691	195.529	174.581	201.95	226.807	172.281	306.923	197.56	172.537	208.322	174.675	183.079	256.505	227.755	614.847	411.123	426.226	575.223	616.028	730.542	1436.56	1069.72	1012.39	1354.36	1504.9	1549.68
495	148.697	141.131	157.91	175.077	158.109	153.889	181.035	164.119	233.917	162.492	191.914	137.138	189.741	147.501	149.95	133.051	139.201	130.387	314.401	196.156	173.14	135.209	202.478	227.794	274.303	151.885	202.671	183.769	185.908	248.892	205.323	264.191	697.236	354.112	370.812	556.313	584.599	712.092	1501.9	1094.98	1024.26	1347.21	1430.83	1605.22
496	153.522	135.301	143.757	146.038	141.853	169.237	168.839	152.084	177.846	158.783	203.287	165.099	131.2	146.003	175.939	178.015	152.376	177.191	283.672	182.169	178.115	180.437	186.574	156.781	273.36	173.599	169.468	159.015	178.154	177.742	233.28	221.006	636.303	307.2	458.552	531.199	605.252	700.821	1362.12	1019.12	1047.21	1367.36	1511.83	1551.78
497	181.739	148.726	152.901	138.129	159.384	155.062	137.787	123.224	193.522	112.535	161.627	133.801	131.575	123.263	138.284	170.254	182.836	192.851	306.091	200.019	185.3	155.614	198.098	182.974	259.504	129.724	151.001	140.538	202.24	172.185	196.252	240.852	630.479	321.159	384.667	520.286	583.157	716.113	1375.51	1075.56	1004.47	1195.08	1511.93	1575.95
498	167.872	134.544	141.005	177.131	151.422	123.745	153.387	117.384	194.312	170.521	200.728	140.947	132.234	115.236	153.843	160.229	151.606	167.884	277.616	160.19	158.289	177.454	151.817	181.646	228.538	162.441	155.976	164.646	177.554	181.43	163.006	237.536	588.443	346.285	465.637	567.227	596.811	691.867	1523.6	1098.53	1009.63	1182.77	1439.64	1544.85
499	185.745	145.876	126.486	134.94	132.84	160.611	169.025	136.992	190.87	145.632	216.59	141.679	130.786	162.955	165.344	135.173	118.034	157.868	285.129	188.767	178.259	167.312	167.373	145.823	235.999	124.566	163.094	115.947	186.804	193.053	229.419	204.564	556.723	336.751	390.45	452.204	615.659	646.28	1292.34	943.603	979.516	1248.98	1366.2	1530.59
500	152.33	141.867	124.659	161.346	88.2517	98.9419	141.833	105.287	185.154	152.707	185.231	131.429	122.739	133.496	161.672	133.542	148.583	141.588	271.219	159.431	193.808	172.337	170.046	184.978	256.407	157.353	165.902	183.242	193.865	180.888	189.798	203.21	565.23	299.497	387.272	563.484	536.734	641.019	1262.47	941.048	892.828	1234.99	1466.87	1480.96
501	191.768	148.945	118.62	170.643	136.294	177.205	129.536	116.565	185.953	116.653	155.621	175.184	177.175	170.722	147.244	134.186	136.066	174.823	291.633	140.669	131.794	170.896	207.474	166.387	307.42	151.46	138.515	145.093	175.27	144.909	205.852	208.293	591.336	273.169	388.886	529.182	565.067	585.636	1317.41	914.48	918.272	1167.67	1406.98	1365.74
502	170.855	143.132	103.99	140.936	154.125	104.136	164.938	143.159	182.265	167.162	175.897	143.372	173.628	136.553	184.929	136.852	162.776	125.862	234.284	163.129	171.503	165.123	143.334	160.962	243.233	167.292	213	165.248	176.12	169.221	174.521	254.418	599.972	298.167	405.609	459.735	550.467	641.66	1282.82	858.206	937.735	1222.26	1342.33	1438.7
503	115.351	128.565	152.31	135.008	137.265	141.602	141.916	176.441	213.544	135.136	196.298	146.607	130.916	126.316	133.277	154.986	155.012	130.741	237.721	137.67	154.993	165.912	165.86	153.011	228.886	176.763	170.266	163.813	172.466	157.058	168.827	225.315	540.031	305.838	388.281	478.795	492.567	637.827	1433.75	862.787	911.755	1177.88	1298.57	1380.49
504	148.844	135.668	129.025	157.646	124.797	133.509	138.286	146.648	168.598	155.543	184.18	146.353	109.698	105.072	149.091	166.858	135.873	166.376	304.93	186.563	173.343	133.782	149.156	160.112	280.293	160.233	138.229	164.671	162.321	138.283	171.858	152.422	531.661	333.482	407.787	437.702	493.167	644.81	1385.47	850.897	964.396	1058.99	1317.93	1372.65
505	138.425	116.591	103.269	169.556	112.192	134.164	147.576	114.4	153.832	140.896	182.947	127.093	171.721	127.646	169.581	152.218	149.713	121.05	284.055	182.871	141.167	182.92	191.773	145.472	244.194	174.177	165.184	123.536	171.834	163.014	155.133	231.814	529.657	306.346	313.146	503.746	534.383	590.768	1209.98	906.831	921.874	1134.42	1183.17	1493.53
506	141.126	141.349	139.012	141.407	165.663	125.855	114.773	123.683	167.66	125.877	181.567	120.975	136.875	128.101	145.919	115.109	125.941	112.731	220.815	150.33	210.208	119.452	161.525	176.854	220.917	168.277	154.815	145.997	159.386	156.962	127.161	175.712	578.227	322.598	322.988	418.186	472.718	546.984	1243.16	895.907	914.522	1041.64	1370.78	1369.81
507	148.164	132.926	143.909	119.637	119.744	117.412	119.494	132.858	192.738	104.171	188.794	125.669	117.49	112.897	144.137	115.444	144.042	130.851	296.977	148.626	164.106	150.885	170.892	159.566	221.77	173.23	142.019	195.239	170.988	150.705	167.251	244.659	456.686	281.986	304.038	470.493	525.409	614.967	1318.49	777.453	827.31	1000.19	1315.83	1413.38
508	148.771	113.436	122.238	148.984	108.985	120.01	142.168	144.481	146.725	108.943	211.813	148.627	113.669	113.332	129.075	135.778	155.731	127.001	264.698	129.176	164.622	133.731	133.62	137.933	187.027	169.178	153.757	138.132	162.635	144.562	187.864	187.882	475.564	282.976	278.608	434.494	489.096	544.16	1133.16	765.243	811.075	1043.39	1193.93	1434.2
509	104.883	136.45	111.61	147.498	127.428	133.959	100.608	129.547	205.553	129.396	174.468	156.255	134.219	111.7	111.811	134.102	165.505	127.512	272.402	154.514	170.098	161.444	174.549	185.58	275.036	167.856	136.573	165.658	172.429	167.717	179.7	179.896	535.206	279.851	297.692	463.006	510.864	609.184	1117.64	793.491	860.546	942.599	1238.34	1284.99
510	150.185	132.564	154.938	143.739	118.99	134.621	148.353	130.203	175.276	148.076	152.789	145.939	139.294	121.203	150.587	92.1253	125.811	123.601	267.102	141.824	146.273	139.709	137.261	146.088	202.182	144.054	148.487	182.336	148.596	139.318	171.63	171.791	520.289	312.703	312.688	453.661	433.307	518.394	1172.69	700.402	811.189	1007.46	1227.12	1278.66
511	135.285	108.249	135.479	133.079	108.244	101.469	144.434	115.032	137.747	151.238	137.919	106.061	142.126	142.074	115.312	153.547	142.24	133.283	266.378	160.642	149.256	151.518	149.413	133.257	198.621	142.472	162.654	142.552	147.02	153.637	127.699	168.175	505.258	249.333	298.642	375.059	411.053	550.157	1106.19	768.681	786.738	1021.53	1229.51	1251.97
512	147.408	151.841	88.5654	106.691	142.869	99.8884	151.955	127.032	181.518	136.192	170.671	140.779	154.197	145.204	143.28	154.463	97.6823	113.634	272.483	131.953	143.234	152.277	166.087	138.536	174.813	152.292	172.728	127.478	150.132	147.724	155.4	164.703	472.334	255.124	298.121	427.052	413.315	557.862	1074.34	639.789	758.818	1020.95	1110.72	1213.43
513	173.361	120.92	116.612	105.039	100.482	105.126	141.567	114.184	180.362	125.553	171.509	111.846	132.331	102.706	141.84	118.928	143.879	166.924	317.709	153.334	150.983	139.63	121.224	146.294	223.915	153.208	169.387	93.9803	155.688	150.983	163.238	192.949	440.965	265.795	340.754	386.553	416.163	495.949	1057.82	586.566	761.607	929.481	1148.65	1332.94
514	105.532	160.713	137.948	105.634	121.688	107.991	147.13	103.388	163.084	96.5167	174.751	128.651	133.269	128.561	112.644	131.089	124.054	128.714	261.936	149.575	142.591	108.267	138.079	119.552	209.079	119.657	140.404	165.788	161.187	154.083	164.231	139.359	458.9	265.158	258.213	420.901	473.536	437.188	1080.19	585.913	745.69	903.376	1016.39	1157.15
515	101.454	110.738	136.288	147.784	117.794	127.02	140.802	124.587	129.236	103.815	173.323	120.203	99.3238	124.638	99.3818	129.371	110.959	131.575	251.817	148.072	131.668	136.73	129.503	85.473	212.445	127.262	129.5	171.087	143.347	138.645	135.167	197.548	500.288	255.202	273.324	416.101	436.347	427.606	1107.16	610.346	726.47	892.503	1089.38	1045.47
516	104.357	127.566	139.39	111.433	97.4972	92.7665	113.65	122.817	166.951	106.63	169.525	143.973	125.293	97.3906	106.777	109.178	118.392	130.006	220.819	153.546	120.852	128.027	125.463	125.427	174.064	127.964	137.237	148.639	134.718	148.712	142.706	152.38	442.944	258.772	281.665	369.763	408.813	539.838	1046.06	566.68	721.248	913.084	1157.11	1208.96
517	132.729	107.193	107.498	128.24	97.986	132.871	128.246	114.222	170.292	104.949	184.195	111.9	130.534	118.772	144.734	121.437	116.619	123.781	273.247	116.932	130.858	119.302	116.724	119.171	221.727	126.209	135.531	130.664	154.008	133.12	145.879	180.962	494.069	239.072	280.661	322.74	392.701	458.92	949.485	573.989	622.187	870.784	1003.95	1077.85
518	147.431	117.116	110.301	121.899	93.7933	124.201	110.007	107.852	164.298	131.4	131.272	112.53	70.3211	112.41	115.028	107.975	143.035	129.157	183.142	124.44	112.695	101.125	119.729	124.494	239.505	122.166	98.5285	131.423	131.493	107.957	165.261	130.64	496.696	198.063	251.894	373.683	416.035	424.304	1001.55	621.881	767.735	864.938	1102.45	1080.42
519	87.094	117.8	82.5324	136.828	110.864	106.098	91.8329	134.221	150.982	136.895	155.561	108.487	129.656	117.757	113.196	108.63	124.935	118.174	212.505	148.732	108.64	122.892	139.329	167.676	215.191	106.286	118.007	160.571	129.985	143.951	107.647	150.146	473.727	199.056	250.953	356.994	356.865	401.239	954.235	630.506	629.041	843.491	1009.58	1060.6
520	108.804	123.294	118.523	118.57	125.8	99.5234	111.42	127.893	189.633	118.552	158.895	121.097	97.227	99.4606	113.816	92.6374	97.2459	137.772	227.92	116.399	123.508	85.4636	140.226	128.336	182.98	137.772	132.956	109.211	97.4616	154.298	105.919	165.198	426.856	233.361	254.686	292.906	349.116	471.823	966.934	633.899	628.239	874.777	984.847	1071.71
521	145.138	97.8696	105	116.943	119.609	90.5783	104.975	116.881	140.7	112.018	171.894	119.461	107.339	95.3827	136	107.509	129.046	131.413	229.23	109.949	100.318	121.847	133.969	119.481	231.703	141.018	140.792	129.002	121.963	131.295	123.207	142.375	417.402	173.231	222.984	318.441	374.532	415.522	850.101	589.168	648.717	738.265	945.955	1017.87
522	122.171	134.475	81.7111	98.3423	96.1049	86.3557	127.212	122.394	120.003	129.433	146.642	134.681	100.888	112.781	151.336	81.6395	139.427	149.013	225.847	115.298	115.351	120.316	139.665	127.268	175.272	134.652	144.178	141.838	132.338	110.459	147.815	133.684	436.64	186.217	248.055	382.344	384.185	412.95	861.829	489.404	610.025	747.09	966.191	1063.6
523	108.343	110.987	106.312	122.953	96.5789	94.1049	113.4	130.214	156.986	98.9043	157.048	101.616	125.586	101.329	127.986	103.754	130.458	137.561	226.839	130.439	96.6165	154.737	125.828	108.662	202.835	161.911	115.974	132.954	159.6	127.97	153.291	175.246	367.101	225.621	266.283	314.474	314.497	434.177	866.417	453.828	555.486	734.056	856.737	1010.15
524	103.994	109.133	109.316	133.194	82.5243	99.4395	121.185	128.441	123.795	113.994	155.362	99.6844	130.944	113.975	128.647	97.0661	128.588	140.537	227.9	121.392	118.906	111.871	114.067	111.659	181.999	94.7409	126.174	106.931	150.614	135.952	146.712	154.382	417.333	209.827	267.84	332.998	352.448	414.29	893.362	449.259	606.772	746.855	918.975	1021.39
525	107.081	100.028	119.694	68.2237	117.16	121.911	90.1878	95.0582	156.084	109.8	134.35	114.873	119.403	136.447	109.861	102.577	129.295	129.254	236.49	102.537	102.602	117.434	129.323	107.491	168.364	127.056	117.203	109.939	144.114	131.924	147.58	130.865	429.238	215.889	240.251	342.59	310.597	455.749	916.457	469.162	561.631	739.009	945.251	1060.77
526	119.978	88.3848	100.793	73.5449	90.8312	88.2861	120.392	115.215	120.214	117.912	137.665	110.602	122.733	105.409	90.8864	73.7024	81.0845	117.881	152.211	137.585	130.211	135.138	127.872	140.178	142.391	113.035	137.688	144.93	100.822	130.274	99.9266	143.974	412.161	224.573	251.497	313.145	336.851	383.294	746.28	501.631	633.292	726.401	868.998	924.914
527	98.6017	101.317	116.212	106.205	71.6862	96.3797	96.4477	86.482	145.823	103.887	101.488	91.3972	125.968	71.62	91.524	86.5493	111.394	131.214	168.128	111.375	121.172	106.283	84.1912	146.068	150.854	116.252	108.882	106.311	136.195	118.725	130.076	145.194	351.334	216.263	204.049	329.772	334.281	378.432	695.162	428.543	541.495	743.901	841.106	877.193
528	114.204	92.0655	101.969	94.5537	99.5424	104.474	119.428	111.991	82.2345	94.5767	122.017	84.5431	156.653	79.5913	82.1364	92.1349	117.022	99.6684	223.938	154.595	89.6557	109.497	99.6466	129.613	186.851	99.7826	121.99	112.13	149.455	129.481	101.284	126.323	344.293	200.302	220.228	289.584	371.171	413.177	785.307	393.937	530.256	654.766	850.52	1004.86
529	87.3808	107.604	82.4877	80.1009	85.1361	80.0191	140.207	107.664	130.284	122.645	190.332	105.16	75.0526	60.0976	102.694	97.6704	125.331	115.195	165.212	130.494	130.319	142.864	127.754	142.902	142.826	120.391	120.183	117.834	117.826	115.237	126.8	146.893	450.867	184.163	214.074	264.152	331.204	388.526	782.197	411.28	595.906	618.181	743.399	796.51
530	110.584	123.288	108.163	73.0037	78.0461	90.5945	105.838	83.1217	143.406	83.1177	138.513	80.6775	98.2204	90.6408	88.1851	110.915	113.414	108.384	191.353	126.083	126.025	106	136.15	141.038	156.362	113.453	125.841	120.987	141.285	108.365	139.942	145.182	333.214	165.227	222.908	268.257	305.818	388.709	704.64	419.249	562.428	679.712	775.465	815.825
531	126.544	91.1826	81.0236	103.902	83.6288	98.7883	103.999	121.547	126.578	81.1301	134.359	93.898	116.573	80.998	81.1479	91.3403	106.39	111.698	197.505	114.173	83.7449	106.623	116.767	88.639	190.357	124.261	96.2998	136.947	124.327	93.85	118.079	168.635	418.277	191.57	158.805	350.456	325.251	345.823	686.893	391.963	510.568	618.668	719.637	825.593
532	119.55	114.669	94.2375	117.283	114.806	79.0691	107.296	119.739	132.413	97.0178	114.789	86.8223	84.1376	96.66	91.8088	107.1	109.62	119.882	224.41	132.904	99.5782	155.845	104.733	130.148	176.095	104.563	125.014	127.624	119.908	130.157	126.399	124.138	436.043	210.584	238.62	238.412	289.124	393.736	633.202	425.229	534.096	637.784	686.59	813.269
533	104.968	112.835	74.3687	112.786	115.633	107.801	118.254	76.95	146.141	100.196	135.945	82.2821	87.2142	84.2578	120.558	107.777	120.596	128.319	213.097	138.885	105.296	113.146	107.953	92.5808	169.517	115.431	100.086	120.743	118.047	118.102	139.939	147.868	375.121	155.644	211.921	244.959	242.466	296.229	761.583	371.302	482.859	673.187	780.884	910.285
534	103.054	136.819	90.3764	131.525	85.3075	108.423	95.6478	118.679	90.3478	100.784	124.008	95.7574	123.851	110.301	90.3654	113.627	141.961	113.752	221.9	108.531	116.252	98.2113	111.253	121.573	180.718	121.433	118.754	121.599	131.775	105.88	138.268	176.974	442.082	159.239	231.26	262.12	287.665	341.223	635.467	372.911	408.728	654.109	718.746	872.601
535	95.9796	101.384	111.72	114.338	122.306	80.515	132.744	90.9106	148.144	104.004	132.741	104.085	145.549	90.3836	98.8423	80.609	122.175	119.73	254.581	106.586	135.255	119.637	109.313	122.407	197.579	109.249	132.563	135.38	130.163	114.402	103.139	113.738	351.902	186.238	204.334	243.332	287.096	341.048	563.71	382.563	435.029	548.991	675.21	839.635
536	115.095	109.963	88.9353	123.063	99.4176	109.77	96.9238	120.315	128.256	86.3804	125.788	115.149	86.309	91.0245	102.16	73.3531	96.8413	117.932	235.726	125.696	117.826	104.704	112.578	125.837	201.495	117.918	96.8484	146.671	133.646	91.6022	132.444	96.312	366.929	213.546	252.677	341.376	276.041	367	588.284	354.063	435.548	563.631	690.939	818.995
537	105.273	102.714	110.65	97.5816	100.073	115.798	113.273	92.179	123.904	110.623	110.89	100.104	97.4654	94.3723	97.6482	92.3294	126.531	107.887	221.596	121.341	134.531	126.46	121.217	118.675	158.225	116.037	116.131	110.658	116.032	121.335	99.3652	125.726	377.124	173.066	220.261	288.702	298.723	324.856	630.748	380.258	475.403	536.164	710.861	782.765
538	105.925	92.7181	100.768	124.734	84.8512	103.352	108.692	90.1829	122.003	98.1164	140.802	129.969	116.685	105.748	124.865	90.2795	122.101	127.005	281.425	106.227	100.896	98.1952	71.6821	103.48	191.082	135.291	108.845	143.284	119.366	124.789	113.196	129.165	342.626	139.929	218.96	290.743	226.748	292.641	574.598	366.94	462.736	547.67	710.396	708.923
539	111.87	114.748	74.716	40.0332	117.354	85.3627	101.504	104.109	82.6369	96.0938	98.7726	120.073	74.7232	111.791	112.317	96.2295	133.545	98.6431	205.684	101.425	93.5542	90.8812	96.178	74.7814	141.592	104.079	122.795	101.603	141.554	152.193	106.051	143.214	315.937	156.797	164.61	265.372	267.974	323.871	669.19	419.429	427.952	537.702	649.076	705.196
540	123.308	80.5297	72.519	107.459	75.1081	102.032	77.9495	99.3489	115.367	75.2104	118.15	99.4311	99.332	91.1031	88.7703	88.7811	72.5508	96.6802	204.356	115.454	83.4066	99.4892	91.3958	88.7444	160.794	112.928	107.527	75.4415	102.171	96.7696	106.712	112.085	358.48	165.767	205.942	277.692	210.954	301.839	523.241	363.407	387.569	549.112	578.45	688.549
541	105.246	81.0152	75.6859	73.0752	91.8618	83.7096	70.3156	78.4557	97.2513	86.4855	105.515	113.717	86.4519	107.908	73.1108	83.9257	105.54	140.621	162.374	102.802	91.9736	111.034	97.4217	111.053	86.1943	119.1	105.535	127.307	110.971	121.756	83.2144	102.084	339.135	153.333	191.132	266.302	263.58	311.737	599.316	325.622	486.864	525.794	671.122	690.575
542	89.6516	95.1289	73.1968	87.0722	87.1146	81.545	111.61	92.6493	100.68	78.9073	136.206	70.9064	116.975	57.0566	87.2227	103.698	103.552	117.092	207.139	106.344	119.742	98.1495	79.0033	92.611	149.043	87.2333	95.3418	89.8631	98.1256	100.844	121.565	105.44	295.176	170.561	170.809	306.112	295.276	327.364	541.425	300.993	479.718	502.154	594.168	722.208
543	84.9073	98.5374	73.6652	101.287	76.8678	125.994	76.7314	107.05	87.6718	117.806	112.422	74.0955	79.5531	68.4719	85.1348	85.197	90.6053	112.42	181.272	134.66	90.4863	87.7699	120.795	95.9656	144.732	98.7964	71.3825	98.7507	115.279	112.589	108.76	98.092	398.241	144.504	193.717	242.722	261.857	267.048	507.275	322.256	477.829	519.566	625.698	604.396
544	88.2012	110.38	98.991	88.2612	96.7024	102.121	85.6903	80.1268	121.433	88.3127	146.414	80.1249	82.9181	74.5102	107.922	91.2232	105.178	63.5396	179.783	121.779	82.9302	110.477	94.0974	99.4605	140.571	77.3676	74.6008	85.6591	102.256	85.6737	137.03	112.511	310.586	164.933	173.247	233.582	247.406	276.98	486.246	319.21	374.075	512.023	597.477	575.98
545	83.2962	108.461	72.0502	122.218	77.8508	75.0832	86.3473	75.0832	116.861	94.5446	130.844	103.067	83.438	97.3183	122.65	100.191	94.7842	75.2386	186.594	80.7666	122.554	91.9807	128.197	116.933	164.151	83.509	100.186	105.85	108.554	83.5212	162.95	135.423	282.57	138.511	177.346	240.864	246.592	292.758	492.921	296.665	379.53	457.574	588.07	671.353
546	83.9703	70.0705	81.0473	75.5623	109.265	100.833	100.99	100.828	140.257	78.4924	92.599	56.1424	81.2799	58.8564	81.3412	70.0842	87.0144	120.712	182.552	86.9023	78.6128	95.5259	109.502	78.5612	184.887	112.238	109.329	92.6147	95.2774	126.274	111.263	108.487	267.672	147.985	172.942	172.838	248.322	266.833	538.679	332.195	373.923	477.68	547.675	634.005
547	101.469	96.0322	61.9381	76.1849	70.5793	73.3098	98.9603	87.5418	81.868	87.4886	96.065	59.3111	84.7055	87.5162	110.203	101.676	82.0196	101.753	232.019	67.7512	101.793	144.238	84.7818	90.4537	146.637	84.8189	104.496	104.485	110.021	110.289	109.29	86.8404	275.065	179.843	171.297	235.799	216.212	221.111	573.237	300.85	323.187	478.462	514.738	571.104
548	85.1235	93.7816	113.465	79.5935	76.7136	79.4892	71.173	82.3701	102.22	65.3931	153.704	85.3805	116.593	59.614	110.968	113.805	99.681	73.9892	190.688	93.7975	122.468	88.1021	99.5549	88.2373	153.565	113.918	108.028	99.6252	79.6342	111.038	110.11	98.7666	319.523	166.746	175.305	212.124	195.112	248.028	458.299	271.92	387.677	444.886	512.608	587.11
549	91.4711	105.758	94.2746	120.175	77.3139	71.5052	77.3534	91.5022	91.4622	88.7311	97.5385	86.0613	74.4649	82.8172	85.9942	74.5084	97.5433	88.8651	200.722	77.3158	114.612	91.5222	60.1843	106.008	208.968	91.6893	91.6313	109.096	94.6075	117.563	90.9652	110.885	353.309	153.745	176.518	202.357	202.088	267.114	524.24	290.865	361.866	442.354	533.342	583.241
550	74.7821	103.61	97.7611	89.2651	60.5096	103.784	63.4002	92.2163	118.06	106.594	77.9098	63.5145	51.8805	83.4331	46.18	83.628	86.6382	77.9725	187.615	95.149	86.5222	92.2701	86.6128	92.2769	129.509	72.1317	100.903	127.125	103.91	80.7875	111.534	68.7161	292.616	131.935	169.127	174.949	217.906	257.48	512.904	229.631	335.745	445.384	519.589	460.399
551	101.387	84.1102	98.3537	81.2059	113.094	90.0641	107.43	95.7768	87.0338	63.8574	101.683	66.8592	89.9371	72.5299	78.4181	98.7151	107.519	95.9308	220.797	78.4296	98.8787	87.1864	75.6021	121.966	141.979	98.78	90.0685	98.792	127.923	113.204	149.813	109.603	268.831	179.242	155.903	204.968	222.419	233.442	429.937	289.185	329.503	445.668	537.61	587.458
552	55.4517	73.0301	84.4481	64.2743	111.054	102.344	87.7876	70.1191	102.396	96.5593	99.5266	99.5217	99.4031	64.3228	81.8952	108.227	125.758	117.207	169.772	73.0905	90.7492	87.8111	93.7474	87.7129	125.487	105.45	70.2575	108.292	114.224	73.1136	98.6783	84.2705	267.814	160.253	136.656	221.066	218.221	238.006	415.631	311.72	358.177	454.504	492.284	518.224
553	97.0634	85.3354	79.2596	73.5543	111.971	138.571	103.181	85.4807	120.902	67.8545	112.004	88.4283	100.211	97.179	82.5853	85.5348	79.5855	85.637	224.22	123.809	100.26	103.272	106.246	120.858	132.427	120.979	100.297	106.075	106.324	97.3801	90.6591	105.49	254.954	146.649	164.16	181.779	213.978	257.822	342.761	284.672	267.018	437.502	481.616	537.686
554	106.696	94.8613	115.36	74.186	86.1143	110.049	109.915	65.3837	95.0204	107.114	77.2698	107.085	77.1403	68.2743	83.2643	92.2461	77.2829	133.951	234.936	103.936	95.099	92.2011	89.1119	92.2214	145.549	101.109	110.006	98.0875	68.469	71.4285	132.706	106.373	289.515	168.399	165.429	153.735	177.336	289.676	499.326	307.709	337.346	385.028	453.083	527.845
555	83.6984	119.5	77.5299	110.833	92.7991	113.862	98.7573	116.767	143.689	92.8577	134.839	101.926	80.7602	98.6877	101.931	120.018	89.9039	126.083	179.786	119.747	98.8895	110.935	137.735	116.997	131.865	119.939	101.961	110.99	101.807	93.0025	104.087	130.935	280.07	154.82	169.694	160.918	253.04	249.882	479.52	280.334	331.33	334.574	438.725	540.801
556	129.578	123.506	99.1692	120.69	105.609	99.4824	108.629	81.4719	105.599	96.5381	93.6739	93.6466	108.632	108.518	141.973	126.959	105.753	117.897	157.065	150.874	132.892	126.895	141.908	135.915	187.325	111.84	142.087	145.047	150.724	102.789	132.027	119.984	327.226	162.163	179.985	231.221	234.049	248.829	465.547	351.898	342.734	430.39	429.879	469.198
557	133.566	121.504	136.304	106.354	130.798	115.426	155.238	136.934	158.151	142.902	164.209	134.041	139.933	106.31	130.941	121.823	137.024	124.687	213.03	142.843	149.085	149.103	161.321	170.44	170.54	137.038	176.781	139.865	112.448	133.976	148.147	120.887	290.409	151.398	187.176	238.994	241.855	266.002	433.207	257.283	378.366	409.567	499.576	500.121
558	152.88	140.769	112.928	150.121	131.806	152.921	141.081	159.397	165.544	171.417	153.114	144.2	140.947	137.709	147.272	153.472	180.991	137.987	211.673	186.753	156.362	134.865	147.297	137.984	205.537	116.704	141.194	171.525	165.09	162.542	173.336	155.27	252.908	240.936	170.266	219.683	295.253	298.398	448.117	298.658	384.175	418.616	491.211	497.916
559	175.548	107.85	129.069	151.266	145.144	135.57	176.108	148.229	126.483	145.017	132.537	135.834	138.728	141.78	145.215	142.17	120.474	163.705	275.149	175.787	129.789	129.843	126.625	182.3	203.84	145.243	203.894	172.854	163.185	210.134	159.194	190.226	288.498	217.929	223.57	227.391	269.763	267.001	456.869	340.838	343.717	498.38	504.423	486.358
560	136.499	149.027	167.237	133.708	133.815	127.291	136.974	152.346	145.975	161.741	145.972	146.096	161.465	158.326	149.288	171.201	167.88	168.064	227.397	155.206	171.197	158.808	133.737	189.725	195.603	146.213	152.313	164.767	152.231	84.0032	181.818	148.396	303.107	173.049	222.196	222.669	200.928	281.266	429.345	309.39	346.349	368.504	573.066	470.991
561	131.321	159.53	115.432	128.406	147.348	143.894	128.434	162.805	150.248	115.955	150.281	100.171	118.898	128.181	125.338	156.787	150.34	147.348	191.429	128.412	163.078	141.029	169.215	119.129	159.577	140.94	150.365	147.197	140.988	137.959	136.585	108.931	339.423	168.171	235.949	227.348	289.712	330.177	458.186	305.509	358.324	371.452	439.986	464.915
562	173.444	132.506	106.991	135.796	126.356	141.857	123.035	100.915	138.86	129.414	145.309	104.178	107.327	116.681	148.537	129.594	113.787	107.489	211.61	107.437	157.964	107.442	101.168	120.085	170.444	101.122	151.598	142.061	123.11	136.064	150.361	109.792	301.202	150.769	209.555	248.308	273.162	245.153	430.892	276.583	320.368	371.511	452.689	481.157
563	114.464	95.5815	95.2177	95.5211	140.067	104.966	120.858	104.956	130.415	127.25	105.122	114.689	127.42	92.2765	98.8445	95.642	92.4675	79.7056	171.896	124.15	98.7027	79.7736	143.547	89.2333	127.337	95.6956	130.657	111.485	127.43	92.5531	139.12	117.12	231.164	158.378	201.995	152.134	205.766	272.594	380.954	247.207	291.457	359.045	406.016	431.539
564	83.3209	89.9397	93.0003	102.763	73.8108	96.2399	96.3242	121.966	115.505	57.7341	115.772	89.9769	96.364	64.2021	77.1531	112.496	112.551	90.069	134.733	99.5326	106.065	83.6701	99.7217	131.717	128.445	106.212	102.813	131.778	86.7656	96.4649	118.017	134.153	249.309	153.351	143.215	143.805	210.704	210.781	412.809	201.516	278.089	323.607	361.792	387.265
565	90.5033	74.5138	77.5912	71.2688	103.568	64.6845	61.5623	93.9133	113.316	71.2221	81.1511	103.684	67.988	93.9521	97.3268	61.6778	61.6313	81.1293	152.119	93.9361	110.247	84.3581	64.8782	77.7686	110.105	84.393	126.436	106.96	81.0366	97.3315	99.7837	103.045	241.728	164.391	150.935	145.117	190.154	209.355	312.824	212.895	261.395	394.068	396.798	390.677
566	74.9712	68.6401	88.1166	68.6151	75.1024	88.1294	75.2102	52.2286	75.1389	104.63	81.8498	62.1392	84.9004	68.6201	81.8338	72.0752	71.9647	91.6918	169.875	88.2494	94.8371	81.7761	78.5241	104.633	124.173	91.7343	81.8238	78.5107	104.765	65.4686	71.4258	94.1658	282.634	136.497	129.765	120.448	198.404	139.825	354.636	172.509	221.321	348.585	332.078	439.654
567	62.5019	98.8047	69.1431	75.7098	102.056	92.3074	72.522	85.5309	111.976	95.5855	82.5258	65.9547	98.7831	75.7061	79.2576	85.8038	65.9371	49.5553	135.145	82.3332	79.0976	59.3997	79.2074	92.3479	121.904	69.3622	75.9256	108.783	66.0496	92.4491	49.0814	127.652	199.887	173.711	147.187	144.447	193.535	239.395	318.47	213.279	216.596	325.312	397.257	483.063
568	49.7184	49.7957	63.0915	36.4894	102.871	56.4763	53.1516	59.7084	63.0286	89.689	86.5145	79.8187	69.7191	76.3479	86.5588	76.3999	63.1852	109.933	169.182	96.3396	89.7436	73.2653	96.4006	89.7261	132.76	69.9077	89.8069	53.1451	56.563	93.199	92.3526	75.9546	184.911	135.44	135.149	152.196	158.629	198.119	304.43	215.123	228.04	264.843	360.587	417.189
569	76.8407	53.6079	66.8034	80.3063	66.9529	60.3207	66.9936	83.685	76.9584	53.5545	80.4314	97.2306	90.3644	60.2942	70.4513	46.8727	93.8458	60.4619	153.786	80.3727	80.4275	97.3088	97.1904	70.3227	140.536	67.0458	77.1421	77.0389	90.5184	60.3927	99.808	89.8923	183.101	126.546	119.807	120.016	179.759	186.412	273.582	160.138	223.169	277.174	333.701	426.993
570	57.2822	104.702	60.587	84.3697	81.0146	74.276	60.7565	67.5154	111.271	67.4498	91.1215	67.5286	94.5147	50.6181	77.7581	64.1771	74.3882	94.796	141.61	94.5699	84.4641	50.6871	84.5382	64.1054	101.214	84.4621	67.5763	84.493	64.1709	94.7036	60.3762	103.913	157.885	127.634	93.9571	174.597	181.207	208.204	282.342	208.431	201.712	259.071	282.664	383.355
571	61.192	78.3134	57.6272	81.6706	51.0379	81.5853	78.2487	51.0156	146.199	64.6261	61.2604	85.0777	98.7526	67.9795	95.5054	71.5036	78.3554	105.609	129.224	81.6369	102.195	71.5105	51.1225	27.2394	142.878	68.155	64.7016	44.3299	112.412	71.6361	64.3071	81.1202	165.957	145.608	148.756	152.362	203.051	162.48	281.172	162.492	240.556	240.737	315.484	342.398
572	71.9471	37.7269	54.7437	68.6544	106.376	65.1773	61.7454	58.2939	92.6677	54.9342	82.4274	85.793	85.8515	61.7034	61.9019	96.2473	106.412	68.6528	123.509	95.9481	68.7129	51.551	78.9718	75.4978	106.277	75.5842	61.8131	113.539	99.6192	96.2075	95.4566	122.843	191.311	139.962	139.813	116.102	122.816	194.548	239.365	228.712	239.33	242.919	307.934	345.36
573	58.7019	72.5687	75.945	62.3077	65.6973	69.1987	76.065	48.3838	76.2206	72.7047	100.502	72.6286	45.0109	58.7175	76.2354	65.867	62.335	86.5658	128.033	69.1298	83.0728	93.5184	65.8381	93.4206	100.304	96.9301	72.9639	69.2712	72.717	76.1445	85.8035	92.8919	158.49	82.5666	134.301	165.309	185.68	168.671	303.397	196.262	258.69	262.457	331.308	348.361
574	69.631	62.7349	86.9437	76.7357	62.7014	66.2282	62.7044	59.1993	115.076	59.2914	69.8498	83.6486	80.3077	73.1143	76.831	62.8878	66.4123	90.8313	118.543	48.8579	62.7822	55.8703	87.4059	62.7899	115.092	90.6854	83.7015	66.283	69.8566	104.706	100.353	76.2737	145.73	55.5188	100.584	149.297	180.331	173.479	267.534	149.369	163.462	267.91	309.452	344.381
575	63.1945	84.409	70.0902	63.2668	77.3844	59.7084	87.8171	73.7754	59.7418	77.3204	73.9011	73.8435	70.4283	101.9	63.3746	77.4503	81.0221	35.203	115.975	98.5563	77.4598	70.4283	84.5283	91.481	102.029	77.3242	126.672	84.3865	105.581	105.565	69.8515	94.3815	157.447	101.432	101.343	108.448	174.671	160.95	276.702	196.2	189.115	291.03	322.29	301.286
576	53.135	63.7853	60.0737	92.2868	92.197	53.1376	67.3305	88.6186	85.0449	53.1518	85.0822	53.2294	67.4781	60.2709	78.1212	92.2351	99.4536	63.8955	162.987	81.5827	95.9695	63.8691	60.3546	102.915	113.611	95.75	81.5906	99.4027	70.9363	81.6304	81.0209	95.2266	151.852	126.975	112.777	179.894	137.317	183.408	222.497	201.302	201.292	243.799	286.234	314.351
577	67.9172	82.1256	85.5924	53.7024	67.9056	53.6019	78.6543	107.238	89.3234	85.7797	53.6175	96.5749	78.7481	60.7399	60.8909	53.6371	68.1076	78.8249	121.684	78.5607	50.1027	57.2533	57.2895	53.7233	118.091	50.0917	82.2775	78.8191	93.0139	82.4099	103.064	96.0236	149.507	103.189	95.9771	156.578	134.893	202.692	277.825	252.696	270.668	238.835	321.026	252.886
578	82.8852	71.9953	57.4762	68.5371	86.4953	36.0204	75.6557	72.0566	68.4471	79.297	100.997	75.7036	64.8762	57.5949	61.3346	61.2407	57.8267	64.9932	126.213	79.2257	64.9141	108.267	104.599	64.9742	100.872	79.2989	90.0992	82.9579	72.2006	83.0043	71.6385	111.112	143.499	93.3083	89.6674	172.191	175.425	154.123	244.203	197.23	183.259	226.527	305.668	308.987
579	83.4935	58.0994	61.6482	61.7967	69.0215	47.2046	36.3024	54.4761	68.9628	61.7471	94.6323	83.6256	94.4367	105.318	76.4152	72.6825	61.9565	65.4971	119.938	58.1206	76.3687	58.2338	43.6361	72.7179	87.1194	98.1716	83.6052	69.0232	83.7071	65.4159	90.2669	86.7002	148.263	112.074	86.7589	119.34	129.903	188.014	256.935	170.072	192.062	271.911	289.778	333.472
580	54.8243	47.5918	106.262	66.0038	76.8641	91.496	73.2288	65.9027	73.1843	76.8697	88.0244	40.316	65.9284	47.6358	106.381	88.0179	51.4302	55.0286	131.78	54.9831	95.2878	73.3179	84.25	51.3338	113.59	98.9961	98.9334	91.585	69.7301	65.9428	98.3282	105.671	112.975	87.4177	120.287	127.546	98.3092	145.798	258.848	168.038	156.946	270.631	259.112	274.048
581	77.3179	70.1039	88.7292	92.4375	51.648	36.8896	77.6361	59.0105	51.658	84.7905	92.3228	62.8345	110.804	77.6305	88.7508	73.941	51.7877	59.2003	147.508	88.6083	59.1153	62.8009	88.6493	66.521	81.3074	85.0321	62.8529	73.8852	96.0601	81.2658	95.3939	91.7426	128.558	73.3817	110.102	139.574	117.445	183.796	261.187	169.363	191.171	202.75	275.888	301.959
582	74.302	92.9835	55.8879	44.7223	81.7699	93.0152	74.5099	111.518	74.4411	89.2187	81.9151	100.63	52.1303	74.4972	82.0448	81.9131	96.8959	78.3747	137.656	70.7001	93.1329	44.7027	52.1405	67.1063	122.95	89.5427	74.539	70.8327	93.1805	93.1669	77.541	99.7701	151.866	107.311	151.565	155.698	118.466	177.927	259.534	159.332	152.024	300.711	189.195	293.486
583	63.6971	60.0289	63.818	82.5438	82.4676	78.7784	78.7822	63.7265	97.5707	60.0187	93.8363	108.871	75.0015	93.7678	67.7037	60.083	112.628	105.258	101.499	93.8226	78.8301	63.8397	101.351	93.9803	86.3588	71.4459	82.6664	48.7996	78.9357	105.281	96.794	82.0134	194.136	93.2241	67.0921	123.348	175.528	123.252	224.155	183.024	201.866	239.406	261.907	310.652
584	56.6748	98.3988	52.9943	83.2079	94.6165	109.739	71.8404	79.4006	102.129	75.6748	155.103	106.009	68.0461	94.4649	49.2797	83.3376	90.8076	71.9348	136.49	49.1946	124.976	83.3051	124.888	90.8385	102.198	140.299	90.9336	98.4515	90.9558	71.9944	105.251	94.081	184.497	94.04	112.821	120.505	161.862	173	267.3	188.353	199.737	271.815	301.701	335.415
585	99.0135	110.562	95.4625	68.6528	95.502	99.2206	99.0904	68.6378	106.809	99.0736	106.819	87.7657	72.4739	118.146	72.6275	61.0529	87.8469	68.743	152.852	118.25	95.4857	72.5656	68.7598	99.1675	87.7379	76.4221	57.2886	72.5639	110.896	84.0356	106.151	102.409	186.051	102.431	94.7865	155.694	174.546	121.412	239.244	178.457	178.596	262.715	349.863	288.87
586	76.7818	76.8639	53.8924	88.5182	107.777	84.6181	65.3359	88.4601	88.4945	84.5605	84.6531	107.761	96.1616	100.028	119.444	57.7433	69.4169	100.164	157.87	96.1733	92.3915	84.7727	88.6044	92.4455	130.703	142.485	73.1682	84.752	65.594	104.004	99.387	84.0764	160.91	107.156	133.832	180.04	126.279	164.57	302.532	172.412	187.71	306.956	341.406	310.846
587	96.8186	89.164	77.6641	124.241	104.841	54.2737	58.1448	85.3765	97.0423	73.659	124.214	81.5513	73.702	93.1675	108.777	73.7971	58.3119	104.892	116.499	89.2204	93.2264	81.6347	85.4784	100.958	108.637	62.2267	93.2764	104.979	93.3969	77.7095	92.5684	104.054	185.311	96.4884	104.069	131.272	169.701	185.271	200.91	142.924	204.724	197.294	205.041	294.264
588	54.7146	93.7646	93.9814	101.719	93.8877	89.8839	97.5412	101.687	58.7255	46.9142	97.8521	39.1618	62.636	113.45	58.757	78.3083	74.4708	74.4327	113.636	89.9823	86.2042	97.9855	86.2588	93.9357	117.397	90.2346	117.611	62.778	94.0386	70.5358	77.7389	120.539	148.133	97.3217	132.147	136.306	159.484	159.507	202.522	175.158	179.12	233.991	206.632	269.338
589	66.902	78.7866	55.2204	122.214	43.3569	43.3137	66.8452	74.8255	86.7981	43.3969	86.758	74.9967	82.8487	82.7802	35.5654	78.9208	79.0054	63.1966	90.8849	102.587	102.682	98.8145	94.7395	71.027	126.252	71.0858	47.4044	55.3226	67.1186	71.1742	101.768	47.0537	133.759	102.061	105.912	149.26	98.2018	149.007	207.986	137.363	153.087	208.395	267.128	243.93
590	59.5153	55.5908	39.7724	67.6148	95.3912	55.5989	79.2307	79.3711	59.6877	111.387	87.4419	35.8178	51.669	67.4966	59.7211	107.459	71.6741	87.5889	115.45	79.5623	83.5689	51.7646	91.4922	91.4989	67.6559	83.5323	39.8558	83.5892	71.6968	91.6908	63.1321	90.8928	138.825	90.994	118.593	162.317	134.558	158.155	182.019	150.429	134.601	257.912	281.031	281.555
591	88.0387	40.0711	68.1672	72.1911	60.1373	60.073	87.8808	92.0494	72.2421	112.264	88.2121	80.1636	48.0958	80.008	72.2474	92.3745	68.1755	84.3297	120.55	72.2298	76.224	40.1374	48.152	76.2351	72.2192	84.2681	84.4078	84.2332	68.3135	76.3745	75.6331	67.6963	143.819	55.8321	91.7553	95.8003	131.553	199.454	251.391	123.745	167.675	180.202	259.453	255.821
592	80.7403	68.7127	76.7704	93.0275	72.7033	32.3196	44.3447	64.6157	80.9861	64.699	60.71	68.7427	97.0651	80.6756	109.344	68.8281	72.8733	56.7082	113.477	72.836	64.6802	76.8918	44.4968	68.7829	113.309	60.741	72.9532	88.9807	77.0155	64.8141	76.2718	68.3257	177.048	76.4416	128.812	88.64	100.445	169.099	177.057	152.976	205.464	205.873	249.664	225.722
593	65.157	85.5539	73.3622	77.5661	52.9684	48.8666	77.2933	77.4304	69.4182	73.3783	73.4873	44.8848	81.5731	89.6083	65.4256	89.7784	65.3602	106.254	138.884	81.5671	97.8901	57.1164	93.8478	69.2882	53.1052	77.5642	73.4479	32.6451	102.22	77.551	105.295	68.883	129.803	109.577	101.382	150.336	101.272	109.718	210.849	137.99	186.913	211.503	251.86	207.401
594	69.8691	65.6713	74.0078	49.3217	86.204	69.8096	53.3203	57.4945	65.8344	73.9556	41.1255	86.3698	69.8929	86.2208	49.4456	69.9218	28.8299	82.3792	127.598	65.7879	69.9712	65.8055	82.1949	78.0795	94.5701	78.165	65.7176	94.6	82.4154	61.7363	114.228	93.8576	81.8208	114.635	85.7914	81.8069	114.308	130.939	212.528	118.629	163.848	200.699	188.352	201.05
595	57.9687	57.9039	78.7311	82.8567	57.9335	45.528	49.6524	66.1952	49.7116	49.6681	74.5928	70.4436	53.8569	74.4135	58.0605	62.1789	87.061	49.8061	145.254	86.9425	103.626	49.7516	57.9475	99.4837	99.3362	74.6219	58.0138	37.3191	49.794	70.5862	69.9094	74.0128	107.164	90.6945	98.8055	107.145	111.062	102.972	210.058	127.794	194.043	140.266	136.137	194.151
596	62.5598	58.3254	58.4943	87.7436	50.088	70.9286	41.7116	79.1578	83.4881	62.5841	96.2007	70.9873	37.6291	87.5051	54.3148	75.2527	66.875	71.169	50.1905	79.3252	83.6019	50.1197	121.149	87.7457	71.0218	75.2857	58.5327	75.2894	71.027	58.5199	91.2666	70.5293	128.84	58.1659	116.228	108.085	66.3982	186.731	199.469	149.725	133.173	166.478	233.036	208.209
597	58.8331	54.5777	58.9962	84.1554	71.6243	63.1319	37.8497	50.4357	71.6836	63.1058	84.4508	54.7702	58.9933	88.2967	67.4505	67.4965	63.2749	71.8287	109.714	71.6627	63.281	50.5608	71.722	84.307	84.3316	105.54	50.6298	67.4604	71.6644	54.7729	104.35	58.5716	117.37	62.8874	100.53	109.06	108.892	142.362	180.439	155.239	125.952	188.978	218.417	214.253
598	42.3843	76.301	29.7563	50.9526	29.7534	76.4419	42.3936	80.6201	55.2981	50.965	46.834	85.0843	80.724	101.888	68.0707	72.4168	72.4115	72.4257	93.6953	42.5401	46.8135	42.568	89.4169	85.0822	93.529	59.6258	55.3573	72.2654	68.1338	59.5098	100.939	80.281	122.638	80.3685	84.5554	143.842	114.166	147.797	165.167	169.299	169.525	165.343	250.128	212.102
599	64.1959	68.4706	85.8381	42.9003	42.9201	51.4053	59.9307	59.9758	34.3152	55.6972	73.0441	60.1686	77.1605	55.7216	64.4334	42.9588	98.8533	77.4049	107.4	60.1028	68.7759	64.5073	85.9008	64.3504	90.1015	51.6071	77.3616	77.2261	81.6674	64.3833	67.9727	59.6917	98.2145	72.5459	115.253	157.909	102.363	115.142	196.515	170.886	158.166	171.226	222.529	201.333
600	60.4872	64.7684	64.9891	90.9184	47.61	34.5868	64.8345	43.1968	60.6226	60.521	65.0413	65.0492	86.5447	69.192	56.3623	65.016	39.0248	43.3979	86.6247	82.3616	65.1127	69.4451	56.2883	64.8959	64.9259	47.7167	56.3568	69.2981	91.1266	34.6482	51.4876	60.2358	103.509	90.4477	99.1145	120.614	124.795	107.66	189.592	129.355	150.91	107.966	133.835	216.152

## Sheet: Sheet2
Conc(uM)	FI at 373	FI at 384	FI 373/FI at 384	ratio from 20 mM HEPES
0	5736.14	915.127	6.26813	4.26523
0.01	5320.59	751.357	7.08131	3.87396
0.02	5416.72	837.469	6.46796	4.43234
0.03	5390.97	789.081	6.83196	4.23806
0.04	5593.86	801.346	6.98058	4.02091
0.05	5497.31	802.996	6.846	4.14522
0.06	5369.02	731.163	7.34313	4.13008
0.07	5667.98	826.468	6.85808	3.64979
0.08	5749.08	986.339	5.8287	3.78887
0.09	5373.29	842.259	6.37962	3.8428
0.1	5560.9	891.161	6.24006	3.89762
0.11	5469.8	791.873	6.90742	3.68778
0.12	5683.68	820.065	6.93077	3.72128
0.13	5492.98	837.18	6.56129	3.54885
0.14	5767.32	905.557	6.36882	3.46939
0.15	5570.81	786.912	7.07933	3.62783
0.2	5959.08	1120.28	5.3193
0.3	6231.68	1056.94	5.89598
0.4	6692.72	1499.65	4.46285
0.5	6507.7	1549.41	4.20013
0.6	6845.4	1682.8	4.06787
0.7	7108.45	1843.04	3.85691
0.8	7684.87	1775.57	4.32811
0.9	7293.96	1802.99	4.04547
1	7836.33	1990.33	3.9372	3.71689
1.1	7473.75	2019.6	3.7006
1.2	7515.2	1995.99	3.76516
1.3	7933.54	2239.85	3.54199
1.4	8244.71	2166.6	3.80536
1.5	8241.24	2427.06	3.39557
2	21414.8	10265.5	2.08609	2.3819
3	29563	14262.7	2.07275	2.36391
4	34571.4	17705	1.95264	2.23629
5	42870.7	23071.4	1.85817	2.02702
6	50984.9	27180.7	1.87577	2.10329
7	55870.1	30534.3	1.82975	1.99104
8	65580.3	36010.6	1.82114	2.02914
9	63442.9	35210.1	1.80184	1.98591
10	71268.8	40788	1.7473	1.86367
11	78507.6	43543.6	1.80296	1.87446
12	73906.6	42732.3	1.72953	1.82792
13	80863.6	46685.3	1.7321	1.82991
14	88286.4	51657.5	1.70907	1.85185
15	91164.6	53837	1.69334	1.80346
