# Supplementary material for: Daptomycin forms a stable complex with phosphatidylglycerol for selective uptake to bacterial membrane
Source: eLife. 2025 Jun 2;13:RP93267. doi: 10.7554/eLife.93267 (PMC12129450; doi:10.7554/eLife.93267)
Supplement: Figure 4—source data 1. [file elife-93267-fig4-data1.xlsx]

## Sheet: Multi Scans 1 TO 11
Multi Scans 1 TO 11
Labels	0 EM	1 EM	2 EM	3 EM	4 EM	5 EM	6 RE EM	7 EM	8 EM	9 RE EM	10 EM	11 EM
Type	Emission Scan	Emission Scan	Emission Scan	Emission Scan	Emission Scan	Emission Scan	Emission Scan	Emission Scan	Emission Scan	Emission Scan	Emission Scan	Emission Scan
Comment
Start	385	385	385	385	385	385	385	385	385	385	385	385
Stop	700	700	700	700	700	700	700	700	700	700	700	700
Step	1	1	1	1	1	1	1	1	1	1	1	1
Fixed/Offset	365	365	365	365	365	365	365	365	365	365	365	365
Xaxis	Wavelength	Wavelength	Wavelength	Wavelength	Wavelength	Wavelength	Wavelength	Wavelength	Wavelength	Wavelength	Wavelength	Wavelength
Yaxis	Counts	Counts	Counts	Counts	Counts	Counts	Counts	Counts	Counts	Counts	Counts	Counts
Scan Corr. by File	TRUE	TRUE	TRUE	TRUE	TRUE	TRUE	TRUE	TRUE	TRUE	TRUE	TRUE	TRUE
Corr. by Ref. Det.	TRUE	TRUE	TRUE	TRUE	TRUE	TRUE	TRUE	TRUE	TRUE	TRUE	TRUE	TRUE
Fixed/Offset Corr. by File	FALSE	FALSE	FALSE	FALSE	FALSE	FALSE	FALSE	FALSE	FALSE	FALSE	FALSE	FALSE
Repeats	1	1	1	1	1	1	1	1	1	1	1	1
Dwell Time	0.1	0.1	0.1	0.1	0.1	0.1	0.1	0.1	0.1	0.1	0.1	0.1
Lamp	Xenon	Xenon	Xenon	Xenon	Xenon	Xenon	Xenon	Xenon	Xenon	Xenon	Xenon	Xenon
Temp	0	0	0	0	0	0	0	0	0	0	0	0
Scan Polariser	None	None	None	None	None	None	None	None	None	None	None	None
Scan Slit	4.99952	4.99952	4.99952	4.99952	4.99952	4.99952	4.99952	4.99952	4.99952	4.99952	4.99952	4.99952
Fixed/Offset Polariser	None	None	None	None	None	None	None	None	None	None	None	None
Fixed/Offset Slit	4.99952	4.99952	4.99952	4.99952	4.99952	4.99952	4.99952	4.99952	4.99952	4.99952	4.99952	4.99952
Detector	pmt900	pmt900	pmt900	pmt900	pmt900	pmt900	pmt900	pmt900	pmt900	pmt900	pmt900	pmt900
385	2943.51	2424.93	2413	2326.59	2489.5	2434.27	2433.44	2749.7	2433.5	2407.47	2459.37	2423.06
386	2849.09	2309.33	2292.45	2224.59	2270.18	2232.8	2340.68	2574.17	2312.13	2208.49	2214.26	2252.01
387	2504.69	2173.18	2151.15	2087.34	2138.62	2134.61	2123.38	2352.45	2170.26	2086.25	2105.08	2068.05
388	2428.91	1973.75	2043.86	2010.81	2048.17	1978.24	2105.96	2193.05	2069.7	2045.54	2003.55	1960.96
389	2293.51	1943.79	1886.04	1965.76	1993.51	1959.31	1938.16	2083.02	2015.82	1878.07	1865.71	1924.48
390	2237.74	1892.57	1911.47	1800.67	1883.07	1877.73	1830.37	2031.9	1878.31	1829.06	1756.79	1829.43
391	2193.72	1778.71	1758.07	1727.48	1796.13	1724.16	1774.4	1985.57	1755.72	1773.19	1694.16	1735.03
392	2021.64	1676.37	1722.88	1693.19	1684.43	1679.62	1710.01	1866.91	1779.64	1666.28	1648.7	1702.92
393	1989.06	1661.25	1691.22	1613.82	1585.88	1628.39	1680.69	1815.31	1665.3	1601.09	1611.4	1563.7
394	1908.24	1628.92	1613.69	1536.33	1578.52	1600.7	1587.02	1745.7	1639.4	1546.18	1541.17	1521.94
395	1831.51	1518.48	1543.92	1510.18	1523.16	1539.67	1545.86	1686.32	1591.2	1486.44	1532.02	1535.55
396	1791.39	1499.24	1434.71	1494.91	1486.62	1491.09	1537.28	1595.76	1508.95	1443.13	1509.83	1446.88
397	1753.9	1449.73	1450.68	1426.76	1393.69	1479.85	1401.75	1565.67	1486.63	1412.88	1411.79	1389.17
398	1654.08	1465.96	1400.18	1420.81	1444.49	1434.47	1468.65	1578.77	1475.09	1413.54	1387.42	1424.46
399	1634.73	1428.73	1406.25	1353.82	1435.17	1385.18	1419.89	1474.05	1446.44	1363.71	1392.83	1387.05
400	1589.25	1435.66	1293.22	1331.13	1370.06	1330.01	1432.5	1471.37	1427.37	1363.3	1334.7	1337.9
401	1527.11	1399.78	1350.8	1303.15	1332.93	1340.16	1416.09	1513.91	1409.97	1347.92	1277.19	1320.04
402	1473.05	1385.12	1321.68	1313.51	1373.59	1289.59	1397.96	1432.81	1416.87	1344.52	1293.3	1268.85
403	1445.13	1329.74	1323.34	1297.24	1342.98	1316.49	1354.71	1364	1385.97	1286.35	1268.19	1332.91
404	1454.65	1367.32	1363.07	1271.9	1339.28	1357.26	1344.33	1439.01	1359.72	1285.64	1291	1323.01
405	1479.29	1390.63	1310.8	1334.93	1401.85	1332.31	1350.15	1464.98	1393.08	1348.51	1340.83	1335.52
406	1518.54	1486.76	1393.39	1416.12	1459.01	1417.45	1443.89	1485.2	1476.62	1377.56	1380.93	1439.9
407	1612.65	1530.41	1470.9	1467.06	1518.45	1520.38	1565.77	1576.63	1567.99	1483.42	1497.11	1469.4
408	1683.88	1729.75	1673.66	1593.64	1708.61	1681.36	1713.27	1753.48	1741.06	1688.66	1692.27	1665.33
409	1984.37	1984.91	1884.93	1868.45	1922.2	1881.45	1994.89	2043.9	2061.08	1858.29	1904.24	1956.09
410	2089.67	2172.39	2105	2159.91	2142.43	2078.85	2208.38	2181.14	2130.21	2151.64	2168.61	2198.31
411	2510.46	2631.27	2568.94	2588.69	2549.57	2578.65	2547.58	2641.08	2688.17	2553.74	2642.16	2645.79
412	3067.13	3171.71	3167.15	3117.41	3204	3148.61	3187.16	3250.11	3238.49	3065.33	3210.21	3160.1
413	3711.43	3815	3833.11	3764.64	3789.89	3798.67	3822.12	3883.56	3955.5	3706.56	3777.71	3827.6
414	4374.6	4543.89	4460.24	4510.4	4420.12	4375.21	4465.29	4631.09	4647.53	4402.41	4551.24	4613.39
415	5029.24	5292.65	5147.45	5094.73	5104.9	5088.34	5042.8	5218.74	5380.89	5106.54	5248.52	5289.05
416	5571.62	5764.01	5680.45	5661.79	5540.49	5584.79	5691.2	5599.74	5869.51	5595.21	5831.3	5633.45
417	5906.77	6156.2	6067.83	6081.91	5881.51	6036.42	6023.66	6113.1	6289.94	5873.04	6140.1	6214.92
418	6128	6277.48	6217.62	6285.16	6066	6205.72	6138.54	6311.64	6501.7	6158.8	6323.93	6332.15
419	6002.22	6282.25	6178.65	6120.59	6082.47	6155.46	6095.78	6169.22	6420.2	6049.57	6181.28	6185.36
420	5610.71	5906.02	5717.77	5824.16	5696.32	5797.11	5701.05	5831.78	5967.91	5690.67	5931.22	5857.42
421	5142.51	5291.31	5282.57	5225.83	5137.11	5339.78	5185.2	5314.12	5539.9	5160.01	5340.68	5322.1
422	4450.24	4580.4	4447.73	4565.57	4617.01	4599.32	4623.25	4676.35	4840.97	4609.72	4710.39	4723.13
423	3732.16	4005.83	3793.6	3911.12	3902.82	3929.82	3939.15	4019.64	4148.22	3840.22	3924.88	3976.56
424	3102.19	3334.5	3203.28	3211.07	3225.2	3246.19	3222.11	3410.3	3469.78	3290.55	3387.95	3338.74
425	2523.71	2673.87	2670.96	2631.47	2711.76	2715.64	2783.4	2809.44	2908.03	2770.78	2863.38	2891.44
426	2025.95	2279.89	2191.12	2233.25	2294.47	2326.87	2366.78	2477.61	2549.33	2340.84	2404.08	2467.18
427	1705.96	1919.06	1777.65	1947.62	2054.43	2016.43	2092.12	2112.88	2296.17	2084.27	2153.36	2141.78
428	1456.98	1722.39	1617.31	1718.18	1808.13	1864.19	1895.61	1924.59	2052.97	1851.3	1903.37	1975.21
429	1357.78	1641.8	1485.25	1595.98	1681.19	1723.43	1785.13	1835.8	1883.83	1801.89	1766.38	1866.89
430	1295.4	1477.08	1474.12	1509.88	1638.09	1730.61	1765.28	1777.51	1831.42	1766.87	1772.02	1843.47
431	1195.01	1491.82	1444.87	1499.98	1578.09	1674.94	1706.76	1772.03	1782.71	1718.15	1749.75	1785.14
432	1165.35	1496.29	1414.4	1403.77	1575.7	1663.77	1703.29	1672.84	1851.71	1744.83	1717.37	1737.38
433	1221.58	1497.09	1369.5	1491.8	1638.41	1619.19	1685.45	1745.3	1795.82	1673.3	1740.62	1800.99
434	1186.15	1411.8	1432.01	1450	1587.75	1667.41	1719.49	1733.2	1824.7	1703.66	1689.12	1773.09
435	1155.39	1444.93	1373.18	1461.53	1586.39	1651.48	1682.15	1770.23	1855.2	1696.43	1688.3	1829.48
436	1188.91	1470.93	1378.14	1429.82	1648.45	1651.6	1726.67	1755.48	1797.76	1726.38	1714.69	1770.77
437	1141.19	1466.86	1397.91	1457.1	1557.88	1597.3	1697	1720.16	1830.71	1653.29	1703.51	1811.04
438	1153.14	1410.68	1363.82	1497.64	1585.05	1606.94	1657.28	1745.54	1829.88	1663.68	1733.9	1763.61
439	1162.61	1442.18	1374.02	1491.64	1573.93	1607.57	1683.8	1743.9	1828.44	1709	1686.32	1732.32
440	1158.59	1421.12	1377.35	1486.65	1616.22	1663.1	1705.66	1782.96	1855.95	1708.7	1809.62	1796.59
441	1186.43	1449.86	1347.47	1478.5	1601.66	1634.06	1759.58	1732.48	1861.4	1801.84	1755.83	1784.95
442	1203.57	1496.07	1407.54	1476.84	1648.87	1667.81	1747.03	1763.22	1845.04	1737.93	1800.93	1870.22
443	1183.58	1520.89	1400.92	1492.29	1592.1	1720.64	1814.62	1825.96	1887.24	1815.18	1730.47	1834.14
444	1250.49	1541.13	1460.42	1606.85	1682.26	1754.94	1848.97	1901.21	1955.03	1836.13	1838.91	1917.7
445	1277.58	1536.7	1521.13	1631.03	1704.48	1786.77	1849.03	1942.27	1946.34	1816.58	1852.14	1923.96
446	1382.02	1658.18	1573.66	1689.82	1767.44	1860.17	1947.62	1962.11	2027.1	1937.2	1956.38	1980.59
447	1416.32	1627.69	1608.25	1706.2	1797.55	1820.61	1894.39	2037.21	2100.68	1898.56	1924.88	1988.17
448	1422.83	1656.78	1578.18	1669.92	1830.67	1865.78	1935.77	2011.34	2034.56	1817.32	1914.21	1979.95
449	1357.57	1598.3	1516.92	1654.1	1728.59	1825.62	1875.96	2032.65	1975.68	1894.63	1869.7	1982.86
450	1329.04	1576.62	1503.68	1543.54	1709.58	1765.78	1839.09	1918.42	1933.33	1828.81	1841.27	1913.48
451	1229.67	1502.67	1405.6	1519.95	1632.55	1685.4	1754.92	1914.38	1861.72	1772.52	1700.56	1871.73
452	1126.71	1407.8	1385.12	1424.03	1614.37	1608.29	1711.82	1798.68	1834.46	1669.39	1654.34	1776.75
453	1086.66	1415.26	1282.37	1425.62	1534.87	1573.75	1673.15	1747.07	1795.67	1639.76	1654.68	1779.85
454	1036.54	1386.01	1306.87	1385.47	1516.46	1556.01	1621.55	1631.08	1727.05	1642.14	1611.03	1686.57
455	1013.07	1375.55	1283.37	1352.95	1492.69	1563.57	1547.9	1671.34	1692.18	1578.67	1605.02	1674.62
456	1029.49	1345.07	1276.68	1362.14	1459.13	1517.89	1577.24	1650.05	1695.96	1558.47	1572.1	1620.57
457	982.44	1363.88	1251.99	1297.96	1445.18	1534.91	1550.09	1570.4	1680.31	1547.49	1608.64	1684.6
458	1032.65	1403.16	1255.28	1393.25	1509.01	1512.63	1550.46	1626.62	1713.16	1567.91	1571.34	1613.11
459	1016.33	1320.14	1279.42	1342.51	1469.14	1536.08	1581.43	1606.14	1653.12	1489.39	1554.72	1673.32
460	998.178	1387.28	1215.02	1343.98	1479.84	1513.08	1530.42	1610.83	1662.62	1506.39	1526.76	1558.93
461	1003.82	1358.21	1245.77	1368	1455.47	1495.51	1556.34	1574.95	1602.5	1510.39	1511.53	1660.9
462	1013.55	1282.69	1278.62	1248.92	1427.79	1442.26	1534.82	1587.07	1606.29	1553.14	1559.49	1601.89
463	994.387	1302.29	1203.16	1340.12	1495.34	1543.68	1559.68	1560.28	1667.41	1507.65	1549.45	1532.7
464	996.415	1322.18	1230.28	1310.49	1416.79	1424.23	1532.01	1577.71	1587.6	1550.15	1477.55	1561.21
465	986.187	1313.67	1203.18	1306.95	1431.2	1428.46	1487.6	1560.62	1553.74	1459.04	1530.18	1547.26
466	1019.39	1305.5	1173.33	1264.71	1417.05	1445.23	1570.03	1515.15	1650.58	1492.8	1450.77	1566.74
467	991.534	1315.41	1190.16	1342.7	1386.81	1468.4	1513.39	1514.73	1600.59	1399.67	1465.92	1499.31
468	924.931	1290.57	1166.71	1318.35	1447.44	1477.88	1525.13	1437.72	1580.24	1427.91	1451.61	1520.71
469	946.199	1285.6	1160.35	1268.99	1391.62	1355.58	1526.37	1464.26	1545.14	1480.09	1468.07	1509.55
470	951.174	1233.09	1144.03	1237.31	1408.74	1364.16	1467.05	1487.69	1542.8	1423.87	1420.92	1467.21
471	933.51	1282.74	1184.15	1255.72	1348.07	1450.06	1421.64	1421.92	1527.5	1399.83	1409.57	1466.23
472	949.543	1237.49	1150.39	1218.57	1330.46	1351.62	1432.97	1373.32	1511.61	1371.76	1408.99	1406.79
473	932.619	1198.02	1164.49	1169.53	1328.55	1354.11	1361.37	1371.47	1444.11	1390.45	1373.42	1433.03
474	904.785	1199.86	1104.04	1206.95	1308.58	1300.57	1359.66	1339.88	1422.32	1344.52	1320.42	1359.46
475	901.203	1200.5	1091.51	1144.84	1283.77	1309.66	1338.5	1373.55	1405.11	1223.71	1312.81	1384.97
476	881.858	1170.35	1103.07	1135.05	1229.57	1311.91	1365.08	1359.28	1416.38	1277.4	1292.16	1350.95
477	853.719	1192.46	1053.62	1125.48	1229.01	1347.51	1332.35	1313.52	1378.9	1251.89	1266.27	1320.7
478	874.186	1193.63	1032.28	1076.41	1204.91	1246.94	1288.05	1325.53	1357.3	1277.04	1266.79	1283.43
479	867.885	1182.41	1047.92	1097.02	1262.79	1273.26	1316.05	1325.29	1387.47	1227.43	1240.89	1377.93
480	874.807	1145.44	1043.7	1157.38	1168.73	1207.42	1260.93	1270.71	1331.93	1237.97	1248.8	1324.7
481	850.329	1181.93	1057.69	1064.01	1177.31	1187.39	1241.14	1241.56	1285.58	1205.38	1200.69	1240.02
482	839.085	1128.05	1090.99	1105.8	1233.54	1156.79	1264.76	1247.82	1311.13	1215.09	1219.7	1319.34
483	862.529	1156.86	1015.28	1034.38	1148.96	1197.79	1241.41	1204.42	1232.3	1220.42	1208.69	1253.71
484	883.901	1125.6	1008.34	1089.91	1149.53	1163.02	1214.53	1223.12	1226.26	1181.16	1168.01	1225.24
485	801.398	1100.85	963.488	1057.61	1119.37	1127.67	1196.69	1178.51	1244.66	1134.64	1167.31	1181.08
486	807.956	1064.5	952.983	1047.42	1078.12	1123	1154.92	1155.57	1227.07	1104.56	1125.37	1152.86
487	834.116	1093.26	956.486	1025.55	1092.51	1103.33	1129.46	1176.47	1205.5	1101.75	1084.59	1191.54
488	814.237	1060.1	914.836	1002.49	1108.37	1098.72	1134.49	1097.77	1182.11	1067.19	1111.27	1137.77
489	822.102	1010.94	970.649	960.032	1070.94	1118.92	1126.49	1120.65	1225.76	1068.72	1074.78	1156.08
490	755.252	1073.22	950.715	971.876	1098.74	1083.21	1149.53	1129.66	1142.24	1086.72	1044.04	1131.31
491	782.42	994.949	914.821	1002.99	1048.2	1095.29	1116.2	1125.21	1153.43	1056.46	1061.88	1115.81
492	792.102	974.393	917.706	939.143	1046.67	1068.65	1110.63	1085.82	1137.04	1097.75	1069.61	1088.23
493	790.642	1000.88	917.28	914.976	1013.38	1045.47	1077.13	1035.77	1112.52	1014.28	1007.5	1074.59
494	742.211	945.74	886.892	925.007	986.828	1038.67	1015.57	1020.54	1057.81	1005.74	1056.09	1065.54
495	744.536	1006.26	872.083	994.021	1012.48	1016.81	1036.89	1039.63	1030.76	976.232	979.15	1040.08
496	729.505	954.056	880.17	900.232	1029.45	985.343	1035.91	1003.01	1040.37	956.935	985.426	994.04
497	763.259	955.845	886.186	891.515	953.569	977.698	957.511	965.532	1027.26	980.232	944.326	989.741
498	772.145	939.509	840.76	841.932	951.84	980.373	998.396	975.579	1015.35	931.201	932.64	924.027
499	725.481	925.671	860.838	859.999	962.312	961.025	923.801	1020.49	1022.67	900.007	924.362	954.163
500	704.046	910.958	816.673	873.72	964.775	932.706	961.18	969.301	1010.86	921.778	931.9	908.173
501	705.391	897.262	821.1	833.853	907.338	924.426	944.972	948.735	947.607	889.058	879.055	928.989
502	712.234	877.316	772.73	840.69	932.058	891.864	930.432	882.361	904.592	893.063	918.218	885.656
503	694.875	928.619	813.478	810.692	912.945	874.303	937.665	929.01	985.849	902.579	831.715	929.026
504	695.582	907.844	772.482	804.238	846.864	854.496	905.376	932.268	986.216	863.373	894.603	878.028
505	662.296	866.186	781.385	793.749	860.164	891.958	885.004	880.143	888.99	845.603	834.285	863.848
506	656.531	837.525	762.63	789.53	852.486	814.393	898.465	868.052	896.693	849.823	830.978	894.97
507	635.016	867.725	714.031	795.543	898.17	858.683	899.973	864.893	908.862	848.15	799.362	874.027
508	632.225	842.058	724.09	770.554	829.603	865.435	902.925	829.736	895.464	785.251	749.792	841.816
509	683.168	799.494	689.906	721.076	826.042	827.029	861.661	831.729	816.44	781.245	767.122	794.579
510	651.67	804.605	696.723	769.107	796.837	799.083	885.133	827.756	839.121	774.677	762.536	814.446
511	647.275	826.645	709.067	720.472	817.617	800.573	804.361	778.499	831.905	743.448	788.238	819.551
512	629.483	825.81	702.274	705.286	778.018	797.25	787.682	801.347	860.043	744.595	747.367	835.443
513	631.408	801.343	677.622	717.26	806.199	770.964	775.368	785.239	794.63	753.151	752.986	810.42
514	635.327	839.698	703.577	683.445	760.153	768.614	759.394	771.798	789.764	658.504	774.011	751.634
515	588.9	805.459	698.048	697.224	757.631	767.89	814.714	771.966	793.096	704.707	730.227	773.61
516	584.758	765.915	662.866	690.483	709.439	730.611	767.862	752.642	800.566	721.581	687.953	736.349
517	632.196	760.371	670.597	692.194	720.083	706.544	768.544	762.394	762.602	700.861	723.872	703.001
518	605.148	736.226	637.88	664.955	722.314	704.407	713.813	716.275	767.671	683.976	667.356	752.179
519	580.638	727.294	663.318	681.514	720.316	732.096	750.597	745.768	745.089	677.306	708.307	701.669
520	555.652	704.561	671.081	640.779	733.424	707.648	696.6	683.973	742.777	657.517	725.665	719.202
521	592.943	732.026	635.739	647.294	710.434	675.593	712.927	700.781	721.939	637.966	654.586	701.275
522	591.503	718.937	625.159	631.774	713.902	693.762	699.645	740.546	731.637	628.613	684.38	679.951
523	602.952	679.906	639.956	650.487	698.459	698.628	744.348	687.681	730.778	658.097	652.005	701.71
524	615.071	703.911	651.533	642.654	708.393	675.972	695.243	677.492	719.148	670.299	645.866	679.472
525	605.433	721.185	654.974	641.483	680.092	688.058	736.506	722.117	720.995	693.452	694.105	727.587
526	676.501	766.318	674.553	662.03	780.622	718.849	758.104	731.433	739.733	696.05	692.77	695.862
527	671.934	750.048	651.87	683.728	741.678	689.372	770.791	705.469	783.857	695.75	716	714.837
528	683.044	783.671	669.576	715.875	782.79	756.333	815.009	792.75	734.457	714.219	743.403	740.959
529	731.439	784.21	722.767	737.954	777.081	787.337	808.769	807.433	803.941	757.392	744.318	757.794
530	751.549	807.203	749.774	734.762	795.672	798.522	783.378	779.062	799.265	711.787	739.688	807.934
531	750.609	821.182	718.502	742.614	767.06	754.272	788.97	728.313	779.462	684.288	701.851	697.989
532	675.92	762.397	707.239	710.459	709.168	754.479	727.856	778.65	726.081	709.348	715.279	756.037
533	669.486	712.65	641.258	667.67	714.877	662.862	695.869	747.05	706.681	646.415	679.434	729.17
534	575.895	685.622	625.259	579.732	649.702	637.312	667.534	689.895	694.157	622.581	634.075	669.621
535	546.849	667.245	594.392	594.803	579.975	641.289	641.169	632.496	649.3	569.189	596.77	627.68
536	538.01	645.538	521.34	547.115	586.751	596.342	552.336	607.763	625.888	558.536	558.109	620.881
537	503.61	587.411	514.211	560.76	600.57	576.607	585.756	592.825	559.455	549.906	523.928	546.566
538	489.801	585.978	524.999	522.776	566	585.813	583.099	553.927	589.442	529.269	546.29	547.299
539	455.718	561.654	494.07	508.217	551.48	541.306	553.93	564.189	522.102	544.183	505.965	560.553
540	469.846	585.925	497.125	465.2	513.906	534.807	518.264	541.423	548.948	518.369	474.441	519.136
541	483.022	582.315	488.405	471.531	499.599	508.528	530.642	539.646	537.056	508.168	514.323	504.824
542	459.972	519.674	483.685	494.561	536.485	508.66	532.981	509.387	558.244	512.955	504.553	531.621
543	477.581	541.811	479.449	478.774	533.49	532.199	555.025	527.442	533.039	523.448	490.17	531.948
544	462.467	534.741	462.439	480.937	536.16	516.431	521.434	534.147	539.878	483.1	487.124	521.175
545	506.097	523.501	485.974	487.33	494.022	482.923	530.111	529.579	500.429	480.223	471.99	504.519
546	487.354	530.908	464.924	458.813	502.554	500.606	546.197	518.229	528.78	454.995	475.752	511.461
547	463.361	542.55	483.704	471.31	496.23	481.676	493.92	473.458	507.864	465.731	473.114	481.822
548	470.193	553.558	488.667	446.878	481.144	495.109	499.443	484.334	525.477	455.149	454.52	469.092
549	444.939	510.485	476.44	467.042	508.065	490.679	463.85	514.067	498.138	459.404	423.691	465.497
550	464.483	519.507	445.764	463.462	461.732	455.595	483.204	492.961	490.596	428.988	469.505	473.517
551	416.383	501.221	443.716	444.616	472.804	462.942	464.393	460.69	472.593	441.875	489.379	451.278
552	455.079	494.72	441.248	415.744	499.877	484.722	434.417	476.115	509.811	421.979	422.178	431.127
553	427.884	465.55	424.25	432.909	462.521	476.105	452.11	430.428	472.211	468.645	465.667	433.144
554	426.338	484.264	408.353	421.665	491.72	488.276	441.206	475.585	475.909	459.503	407.809	419.17
555	425.199	499.438	456.56	432.478	444.588	429.091	464.042	487.382	433.556	445.298	467.201	450.333
556	413.43	488.233	440.797	391.459	431.295	492.223	476.284	461.607	444.86	413.504	409.614	407.93
557	404.271	485.85	435.478	413.53	411.595	440.313	453.682	461.363	450.547	389.261	397.427	438.848
558	449.919	497.161	400.666	394.468	454.623	421.321	384.918	396.613	463.841	426.254	435.707	438.394
559	437.068	471.209	417.696	446.803	428.582	435.91	478.535	443.625	498.762	436.531	420.19	424.266
560	448.869	507.912	462.436	384.669	480.747	481.981	419.724	461.184	485.62	447.133	495.175	443.031
561	474.86	494.523	466.191	461.223	493.899	458.845	509.022	470.289	508.714	445.864	470.098	447.246
562	526.941	542.685	495.213	472.919	550.893	518.854	521.06	484.604	536.513	477.335	458.952	515.622
563	541.032	547.486	534.81	507.309	553.195	503.653	537.817	529.459	528.889	474.876	533.324	536.898
564	597.779	586.898	555.381	524.697	571.714	567.822	596.712	552.777	550.239	567.523	550.148	569.994
565	686.166	632.38	567.53	555.365	555.641	573.328	587.827	623.012	590.364	524.621	583.444	593.818
566	645.189	625.738	608.67	584.703	594.061	581.848	637.147	658.961	611.923	615.388	597.045	610.63
567	660.417	642.168	615.435	578.651	587.135	594.844	634.854	672.767	643.022	596.005	609.602	590.515
568	653.357	598.277	601.184	584.741	576.415	619.308	613.75	652.897	603.908	544.244	580.942	627.641
569	604.805	626.794	549.6	537.38	539.217	544.635	610.078	629.291	607.931	566.439	562.158	608.002
570	528.782	571.253	493.772	495.209	556.638	546.802	549.395	595.216	517.576	516.363	506.468	569.755
571	499.33	489.165	439.601	476.386	463.303	482.115	524.167	505.136	496.372	493.133	460.525	506.551
572	487.435	471.91	438.865	409.97	447.286	405.923	454.641	494.665	511.6	433.607	426.199	476.154
573	449.2	456.591	413.036	421.765	377.287	423.834	420.539	457.74	409.408	408.033	381.597	408.902
574	394.54	423.685	376.179	396.329	447.466	391.259	411.314	422.639	405.129	385.125	385.679	420.084
575	406.353	422.862	393.128	371.561	393.825	363.698	378.057	425.008	360.763	360.283	342.653	374.68
576	379.519	402.709	363.884	364.992	412.188	358.064	391.854	401.021	378.902	337.283	405.649	362.891
577	398.822	378.284	372.263	364.367	397.799	375.485	375.998	409.845	366.02	354.912	345.451	332.368
578	360.808	407.341	360.011	381.484	386.369	364.81	391.212	389.444	368.832	372.557	390.797	359.506
579	385.633	389.755	362.148	360.037	379.517	347.582	351.031	378.865	404.006	340.426	361.885	340.302
580	399.803	420.354	368.749	334.639	399.088	345.73	339.723	377.34	365.2	342.272	338.153	343.203
581	344.939	376.796	362.453	358.731	370.017	369.176	384.622	369.34	375.6	324.203	357.681	333.02
582	357.111	389.324	356.199	327.207	357.294	345.133	361.445	350.876	390.93	339.306	354.927	326.421
583	385.358	381.198	354.405	345.877	392.348	391.053	389.887	350.012	379.216	367.8	346.415	345.113
584	328.948	369.194	367.787	382.692	391.832	372.279	354.804	349.036	344.341	344.89	326.274	350.858
585	392.519	434.951	356.593	340.833	353.001	371.576	374.242	370.447	381.918	334.736	377.185	347.059
586	384.241	378.147	357.692	391.879	358.523	354.433	345.322	363.655	407.643	351.399	307.496	367.362
587	393.28	424.031	331.575	334.272	380.871	379.941	355.718	361.641	364.183	365.307	315.104	374.488
588	375.253	409.931	339.206	369.385	363.514	350.704	362.923	345.065	359.215	345.574	359.324	339.156
589	349.996	389.561	369.537	325.973	345.868	358.536	345.712	382.793	415.79	322.4	384.049	354.861
590	387.511	370.948	373.563	340.429	374.563	370.421	357.218	356.744	336.148	363.497	332.773	338.404
591	392.713	426.231	332.575	319.134	375.968	344.306	379.184	367.789	416.63	364.417	292.96	343.495
592	356.598	366.173	379.886	359.241	360.988	362.545	347.294	374.037	375.33	321.206	314.952	328.869
593	373.646	372.293	328.014	372.485	344.609	357.515	358.75	392.581	312.994	339.561	344.523	324.411
594	413.291	416.182	373.721	345.626	358.693	369.654	357.475	385.33	358.945	295.284	383.711	300.164
595	380.454	379.2	340.372	316.178	359.265	356.816	347.378	381.043	338.069	315.52	302.712	320.493
596	420.985	398.983	352.579	307.271	368.417	360.756	367.096	379.86	375.764	290.134	330.483	337.081
597	376.679	389.853	347.359	336.283	356.937	345.921	351.215	382.381	355.71	332.242	347.332	334.525
598	363.137	375.355	316.505	312.779	370.825	350.018	407.288	382.685	377.113	339.539	332.315	333.216
599	399.691	371.439	326.957	345.857	367.701	391.015	365.2	354.793	379.327	335.156	326.836	314.777
600	365.697	354.318	363.291	339.355	351.715	390.189	350.935	375.386	370.574	353.784	327.565	309.02
601	397.091	398.838	337.899	347.714	341.546	351.708	344.139	316.867	346.287	343.42	330.336	315.969
602	355.23	370.154	338.459	371.396	375.352	321.577	388.643	380.346	342.578	331.693	299.636	331.891
603	368.382	410.107	343.924	333.659	353.185	322.369	339.83	383.831	360.357	309.88	310.09	334.933
604	407.749	378.38	359.652	341.615	326.246	343.622	344.16	387.681	330.202	332.225	313.21	335.014
605	394.877	360.508	335.046	324.547	374.879	338.968	325.692	372.072	361.921	310.167	333.721	323.498
606	371.317	384.264	366.872	325.262	367.003	342.083	354.421	339.937	352.555	321.319	341.456	340.641
607	387.39	397.158	321.981	362.895	369.042	295.479	344.934	357.255	339.507	326.668	336.474	322.735
608	406.349	369.706	353.046	351.302	341.208	380.317	346.05	382.051	341.802	371.486	343.425	368.081
609	383.556	364.143	370.684	344.24	369.503	303.873	352.96	376.318	343.069	351.27	381.269	341.938
610	382.78	372.74	338.744	385.915	329.125	334.101	370.058	398.158	385.318	347.564	388.677	350.489
611	404.833	388.69	385.615	379.118	360.293	362.536	376.63	363.649	395.543	306.017	313.946	383.54
612	421.318	446.234	388.521	397.786	392.21	377.24	395.663	424.008	385.807	376.219	383.84	348.328
613	414.495	439.675	380.263	366.244	411.089	344.434	380.87	372.393	420.346	391.367	376.521	412.567
614	439.512	413.018	392.618	436.861	369.094	376.224	377.063	415.925	390.724	387.537	400.115	382.572
615	473.838	442.116	406.703	412.438	404.329	435.523	390.88	493.464	475.421	382.333	400.431	382.671
616	466.272	436.974	453.992	404.347	438.028	388.495	432.439	442.802	415.888	460.03	371.429	353.587
617	460.022	455.806	415.505	458.721	399.118	423.237	411.077	465.801	450.372	433.914	428.839	407.009
618	501.385	448.063	415.06	426.35	456.57	408.619	370.94	443.602	441.229	443.945	404.746	405.072
619	504.371	468.796	431.625	386.6	452.446	433.375	429.79	466.845	449.897	375.771	409.354	405.778
620	512.923	488.636	390.256	401.727	448.217	456.721	395.598	437.415	400.109	405.727	434.086	441.076
621	454.556	399.274	422.627	408.821	419.639	391.874	409.636	435.588	385.892	419.653	395.465	392.914
622	433.874	427.907	335.271	424.075	404.068	409.829	386.806	418.622	442.261	371.729	390.203	406.825
623	451.226	393.029	400.767	422.031	418.568	432.38	391.365	419.451	437.476	366.216	369.778	360.28
624	426.308	380.998	390.035	381.187	397.159	401.182	432.386	449.65	420.07	394.512	347.396	347.608
625	410.082	429.956	335.728	346.164	404.529	300.604	391.568	403.642	368.308	390.741	327.201	443.837
626	444.46	362.925	389.191	364.287	369.215	387.631	387.426	379.894	343.895	318.763	366.655	381.503
627	413.951	428.885	431.201	373.05	373.509	371.919	355.818	411.939	381.055	398.513	362.37	374.457
628	394.501	427.124	438.077	376.302	341.677	416.233	364.673	410.878	406.433	334.078	360.982	357.017
629	419.847	416.123	381.451	374.771	364.957	353.603	357.133	418.708	400.842	382.806	395.209	389.481
630	420.455	419.647	393.32	377.705	425.873	356.35	388.41	440.153	392.253	360.094	362.548	314.33
631	393.98	337.501	383.048	374.552	384.152	368.382	350.139	443.74	345.534	379.625	346.937	385.197
632	432.041	368.778	401.459	375.954	376.365	406.496	413.027	424.512	406.531	386.949	366.231	379.017
633	472.421	411.591	398.645	406.851	410.303	375.719	402.295	437.433	419.289	438.479	409.387	392.841
634	447.241	408.938	381.775	404.255	359.203	425.782	362.85	483.788	436.931	360.041	430.296	416.657
635	493.862	379.411	443.402	358.737	322.772	374.28	407.533	486.754	382.093	413.212	373.633	409.271
636	469.903	413.142	433.139	398.603	381.335	454.686	393.142	468.825	387.083	376.008	397.977	365.923
637	442.096	426.365	415.974	444.173	384.51	378.984	399.872	425.675	399.883	411.83	429.255	404.979
638	455.958	434.989	457.393	403.739	450.204	431.461	425.032	440.992	445.644	388.668	414.58	429.906
639	537.612	442.103	454.745	432.015	459.272	490.137	440.489	524.959	488.053	429.161	387.877	416.526
640	528.443	527.366	535.198	461.993	424.112	436.737	504.921	533.983	488.612	404.85	441.521	495.972
641	594.215	623.344	524.634	510.205	570.62	505.275	533.831	515.112	573.347	525.763	510.564	560.568
642	777.005	600.546	652.853	601.016	650.032	523.939	690.473	647.834	656.426	573.106	567.784	628.791
643	840.552	712.516	758.582	735.664	721.823	701.639	782.668	757.859	786.829	751.797	691.269	711.267
644	996.535	860.902	883.51	790.857	876.165	811.194	825.473	854.344	879.492	728.616	841.381	891.382
645	1134.68	1034.92	1003.57	999.08	970.488	991.238	1036.2	1054.22	971.071	1004.53	975.178	1025.02
646	1310.41	1106.84	1171.78	1063.89	1258.7	1192.21	1139.08	1159.94	1202.7	1130.81	1074.39	1197.22
647	1579.61	1271.97	1302.02	1326.38	1258.55	1224.61	1207.95	1362.64	1366.41	1141.72	1350.67	1214.85
648	1716.7	1392.24	1394.21	1357.5	1375.19	1441.78	1357.24	1585.51	1308.15	1390.73	1415.4	1451
649	1659.46	1409.13	1315.5	1362.82	1400.51	1350.88	1438.83	1669.65	1411.41	1396.4	1417.83	1445.44
650	1710.5	1292.78	1356.62	1388.27	1424.05	1411.6	1435.75	1617.96	1340.25	1342.27	1327.64	1359.54
651	1619.98	1251.71	1216.49	1320.97	1326.32	1317.94	1223.61	1568.38	1361.61	1262.82	1273.09	1203.16
652	1491.55	1106.58	1204.71	1086.6	1160.73	1088.03	1233.49	1362.14	1180.95	1272.96	1122.41	1100.46
653	1325.79	1069.83	1012.81	1082.56	1011.51	982.301	1089.19	1309.53	989.79	935.13	993.695	1041.01
654	1139.31	952.765	959.034	894.935	919.859	898.886	852.006	1159.11	981.037	796.565	890.377	873.113
655	897.144	805.641	758.077	778.009	773.824	759.835	632.781	1001.23	816.271	734.672	714.829	723.101
656	776.777	649.948	608.896	650.226	748.418	643.067	574.48	715.055	686.142	594.12	577.418	565.918
657	625.463	543.957	585.857	522.16	550.402	612.667	602.51	606.531	592.992	538.976	510.382	538.016
658	644.583	561.899	564.909	593.487	523.025	498.194	522.73	549.845	468.476	519.345	552.279	462.213
659	584.112	546.304	507.659	492.294	543.264	538.03	441.188	542.225	536.481	480.458	465.315	451.415
660	592.456	542.104	576.155	530.049	490.728	529.863	456.128	582.819	522.225	453.024	536.105	456.5
661	611.299	533.845	513.248	558.507	506.404	517.655	559.153	537.667	544.621	445.644	465.75	478.194
662	673.819	534.286	570.775	492.64	561.999	525.706	521.565	547.935	511.087	473.672	544.526	510.728
663	625.608	593.272	548.35	574.01	545.749	506.735	506.746	590.558	559.216	451.563	536.326	525.263
664	633.513	549.755	546.597	470.794	537.665	528.007	530.28	529.704	559.747	512.725	523.734	551.476
665	679.981	530.678	630.443	532.61	565.51	545.345	571.484	622.606	506.08	516.916	519.243	536.72
666	614.397	564.903	616.295	499.753	480.876	534.21	518.758	588.207	583.963	529.906	534.277	516.643
667	715.698	573.66	577.556	525.316	583.32	597.848	516.012	546.544	511.079	487.05	547.129	489.039
668	675.424	673.676	515.495	611.758	610.539	506.787	542.214	588.886	553.178	640.315	517.82	577.931
669	641.463	608.555	580.491	509.152	587.049	580.953	537.716	582.524	655.632	575.102	530.994	624.126
670	720.477	591.609	567.542	552.127	560.554	618.074	640.065	626.823	641.217	503.718	570.333	593.312
671	677.045	606.483	662.878	661.06	583.846	605.516	587.543	702.871	577.753	674.801	568.477	620.051
672	697.928	539.529	582.807	573.851	561.154	615.979	611.984	662.767	580.892	667.234	602.327	623.508
673	783.212	650.926	595.359	631.726	566.429	584.114	526.268	760.408	669.79	625.665	643.84	591.089
674	829.451	645.24	660.669	616.261	552.593	577.525	614.382	705.016	630.343	619.728	635.272	642.864
675	808.584	593.083	664.46	702.55	677.35	682.882	617.546	716.568	754.12	670.213	591.819	757.03
676	853.408	610.429	710.281	733.771	665.955	631.987	708.208	678.627	667.021	638.102	646.961	659.177
677	757.596	728.36	722.439	786.042	689.876	645.391	633.274	705.645	678.505	679.498	670.881	675.658
678	877.321	763.898	720.277	665.008	633.905	647.066	634.235	772.155	639.224	660.607	649.666	690.311
679	846.62	652.051	617.591	659.32	705.299	633.573	664.447	728.86	708.044	753.758	677.405	708.339
680	174.899	127.209	119.532	122.357	93.2639	122.948	89.2334	117.805	99.1809	100.089	67.3481	102.273
681	158.435	128.945	126.566	126.702	116.136	135.54	90.4026	92.2745	97.8553	120.668	81.8034	70.9258
682	141.527	128.053	106.489	136.633	128.632	96.1253	52.748	99.0602	82.6393	80.6768	91.22	91.222
683	154.549	116.001	132.896	116.381	122.175	150.304	92.9134	92.0829	97.716	109.964	103.716	78.4761
684	142.786	140.074	132.022	104.001	104.263	98.842	117.135	90.597	90.606	77.1965	108.057	116.512
685	122.165	130.682	122.486	82.6791	114.444	85.9486	84.1093	91.8807	109.185	78.355	54.8215	83.6425
686	149.853	100.836	118.444	75.174	104.365	110.389	108.891	90.2556	90.3433	117.688	73.1618	99.515
687	87.5863	119.743	102.491	105.522	108.638	70.6503	74.5754	97.3758	91.5775	107.351	80.0844	80.0717
688	162.768	159.948	103.915	139.74	95.223	107.426	93.709	158.58	101.856	111.91	72.1493	126.33
689	123.041	153.216	117.407	111.585	154.042	124.036	76.6221	106.246	100.305	92.0168	91.4744	88.5211
690	137.057	140.242	109.962	94.8691	113.397	119.671	74.6179	110.899	108.001	87.1384	83.5076	77.3935
691	200.866	108.237	136.338	142.788	139.939	130.744	94.6727	106.303	109.593	97.8686	97.2869	97.3197
692	153.72	125.557	163.579	166.983	113.607	145.365	137.695	107.858	82.621	96.0818	60.5415	111.556
693	178.306	172.108	150.155	131.197	128.133	115.458	74.6945	83.7179	109.661	94.2826	93.8428	122.903
694	187.426	171.434	152.456	129.927	126.778	123.668	121.864	117.637	124.28	128.689	82.0226	108.035
695	170.491	173.91	105.261	118.569	141.864	108.964	127.053	122.661	175.759	120.499	146.472	86.3262
696	182.934	149.837	130.146	153.679	153.988	127.32	111.976	117.648	100.979	98.4646	101.249	127.985
697	141.731	165.49	148.923	142.322	146.086	115.475	110.107	129.561	102.509	89.588	106.147	116.232
698	164.356	140.516	99.5819	106.59	144.727	120.597	115.196	117.648	138.614	76.8969	107.72	58.9498
699	156.288	156.517	118.408	125.642	118.873	97.906	109.795	133.396	130.139	78.043	84.6937	91.4746
700	211.433	112.934	148.427	124.018	120.615	127.806	93.5202	106.874	82.1345	90.0102	89.5837	96.4181

## Sheet: Sheet1
Wavelength(nm)	0nM	50nM	100nM	150nM	200nM	250nM	300nM	350nM	400nM	450nM	500nM	550nM	600nM	650nM	700nM	750nM	800nM	850nM	900nM	950nM	1000nM	1050nM
385	2943.51	2424.93	2413	2326.59	2489.5	2434.27	2433.44	2749.7	2433.5	2407.47	2459.37	2423.06	2326.8	2423.43	2389.02	2426.63	2391.32	2645.58	2400.92	2435.95	2445.38	2409.6
386	2849.09	2309.33	2292.45	2224.59	2270.18	2232.8	2340.68	2574.17	2312.13	2208.49	2214.26	2252.01	2208.44	2242.87	2158.74	2290.99	2226.68	2464.35	2238.85	2252.69	2281.32	2253.89
387	2504.69	2173.18	2151.15	2087.34	2138.62	2134.61	2123.38	2352.45	2170.26	2086.25	2105.08	2068.05	2094.35	2083.93	2134.43	2054.67	2154.88	2327.52	2077.84	2121.8	2118.6	2078.79
388	2428.91	1973.75	2043.86	2010.81	2048.17	1978.24	2105.96	2193.05	2069.7	2045.54	2003.55	1960.96	1915.2	1887.75	1980.62	1964.6	1988.56	2226.35	1958.69	2052.65	1980.68	1951.04
389	2293.51	1943.79	1886.04	1965.76	1993.51	1959.31	1938.16	2083.02	2015.82	1878.07	1865.71	1924.48	1908.97	1870.71	1847.54	1920.84	1878.44	2047.45	1903.38	1940.99	1944.41	1978.08
390	2237.74	1892.57	1911.47	1800.67	1883.07	1877.73	1830.37	2031.9	1878.31	1829.06	1756.79	1829.43	1767.54	1762.73	1800.31	1797.77	1794.68	1950.01	1823.96	1804.31	1788.97	1861.96
391	2193.72	1778.71	1758.07	1727.48	1796.13	1724.16	1774.4	1985.57	1755.72	1773.19	1694.16	1735.03	1679.81	1718.84	1689.94	1706.33	1765.7	1865.84	1673.64	1802.66	1719.35	1733.31
392	2021.64	1676.37	1722.88	1693.19	1684.43	1679.62	1710.01	1866.91	1779.64	1666.28	1648.7	1702.92	1550.43	1606.65	1635.55	1612.74	1627	1781.33	1651	1665.49	1690.76	1650.95
393	1989.06	1661.25	1691.22	1613.82	1585.88	1628.39	1680.69	1815.31	1665.3	1601.09	1611.4	1563.7	1511.91	1602.97	1591.55	1527.68	1614.77	1739.3	1599.44	1658.36	1568.93	1627.94
394	1908.24	1628.92	1613.69	1536.33	1578.52	1600.7	1587.02	1745.7	1639.4	1546.18	1541.17	1521.94	1466.78	1449.22	1553.69	1508.76	1533.91	1685.49	1529.03	1517.65	1583.3	1524.1
395	1831.51	1518.48	1543.92	1510.18	1523.16	1539.67	1545.86	1686.32	1591.2	1486.44	1532.02	1535.55	1382.42	1463.64	1484.98	1477.15	1473.24	1618.44	1465.58	1500.39	1476.29	1500.97
396	1791.39	1499.24	1434.71	1494.91	1486.62	1491.09	1537.28	1595.76	1508.95	1443.13	1509.83	1446.88	1337.42	1431.86	1425.29	1389.47	1419.69	1527.66	1456.35	1454.11	1432.4	1466.92
397	1753.9	1449.73	1450.68	1426.76	1393.69	1479.85	1401.75	1565.67	1486.63	1412.88	1411.79	1389.17	1308.11	1399.44	1427.15	1341.5	1410.45	1566.1	1415.5	1450.79	1424.14	1400.25
398	1654.08	1465.96	1400.18	1420.81	1444.49	1434.47	1468.65	1578.77	1475.09	1413.54	1387.42	1424.46	1290.74	1263.13	1391.5	1342.78	1372.37	1467.69	1411.83	1394.46	1363.95	1367.38
399	1634.73	1428.73	1406.25	1353.82	1435.17	1385.18	1419.89	1474.05	1446.44	1363.71	1392.83	1387.05	1257.64	1292.2	1306.78	1398.75	1311.96	1451.95	1394.54	1367.59	1385.44	1344.61
400	1589.25	1435.66	1293.22	1331.13	1370.06	1330.01	1432.5	1471.37	1427.37	1363.3	1334.7	1337.9	1283.02	1287.6	1288.83	1291.45	1300.58	1406.65	1312.34	1354.3	1346.31	1353.3
401	1527.11	1399.78	1350.8	1303.15	1332.93	1340.16	1416.09	1513.91	1409.97	1347.92	1277.19	1320.04	1209.66	1247.71	1210.33	1255.24	1327.89	1450.45	1305.23	1336.66	1247.8	1293.53
402	1473.05	1385.12	1321.68	1313.51	1373.59	1289.59	1397.96	1432.81	1416.87	1344.52	1293.3	1268.85	1217.99	1270.14	1284.7	1237.07	1250.62	1375.94	1239.22	1319	1349.34	1272.81
403	1445.13	1329.74	1323.34	1297.24	1342.98	1316.49	1354.71	1364	1385.97	1286.35	1268.19	1332.91	1206.3	1238.07	1271.29	1310.39	1246.46	1370.2	1256.98	1324.58	1309.84	1327.68
404	1454.65	1367.32	1363.07	1271.9	1339.28	1357.26	1344.33	1439.01	1359.72	1285.64	1291	1323.01	1193.56	1263.64	1242.82	1263.68	1240.63	1385.18	1270.88	1317.62	1345.26	1282.39
405	1479.29	1390.63	1310.8	1334.93	1401.85	1332.31	1350.15	1464.98	1393.08	1348.51	1340.83	1335.52	1216.61	1270.36	1303.35	1349.1	1247.6	1416.41	1285.22	1353.46	1362.05	1372.9
406	1518.54	1486.76	1393.39	1416.12	1459.01	1417.45	1443.89	1485.2	1476.62	1377.56	1380.93	1439.9	1326.57	1332.61	1370.23	1405.06	1384.48	1474.32	1364.13	1393.56	1430.87	1400.45
407	1612.65	1530.41	1470.9	1467.06	1518.45	1520.38	1565.77	1576.63	1567.99	1483.42	1497.11	1469.4	1384.12	1455.26	1498.12	1438.5	1473.69	1525.56	1450.64	1446.84	1514.66	1475.51
408	1683.88	1729.75	1673.66	1593.64	1708.61	1681.36	1713.27	1753.48	1741.06	1688.66	1692.27	1665.33	1575.92	1650.87	1615.41	1587.99	1579.32	1679.16	1623.79	1749.44	1654.94	1646.43
409	1984.37	1984.91	1884.93	1868.45	1922.2	1881.45	1994.89	2043.9	2061.08	1858.29	1904.24	1956.09	1843.51	1916.99	1898.58	1908.04	1824.58	1957.69	1864	1871.19	1903.08	1861.32
410	2089.67	2172.39	2105	2159.91	2142.43	2078.85	2208.38	2181.14	2130.21	2151.64	2168.61	2198.31	2063.33	2087.05	2117.5	2021.01	2030.42	2127.87	2066.99	2099.27	2111.44	2098.06
411	2510.46	2631.27	2568.94	2588.69	2549.57	2578.65	2547.58	2641.08	2688.17	2553.74	2642.16	2645.79	2526.59	2558.17	2521.8	2520.11	2515.98	2598.27	2561.85	2520.36	2615.07	2524.09
412	3067.13	3171.71	3167.15	3117.41	3204	3148.61	3187.16	3250.11	3238.49	3065.33	3210.21	3160.1	3171	3199.64	3160.21	3045.64	3025.78	3149.05	3047.01	3122.76	3191.76	3120.54
413	3711.43	3815	3833.11	3764.64	3789.89	3798.67	3822.12	3883.56	3955.5	3706.56	3777.71	3827.6	3803.61	3697.31	3756.86	3734.56	3776.55	3825.48	3760.09	3720.98	3857.17	3804.18
414	4374.6	4543.89	4460.24	4510.4	4420.12	4375.21	4465.29	4631.09	4647.53	4402.41	4551.24	4613.39	4382.18	4524.84	4567.5	4400.37	4404.67	4527.24	4406.42	4499.46	4454.06	4494.64
415	5029.24	5292.65	5147.45	5094.73	5104.9	5088.34	5042.8	5218.74	5380.89	5106.54	5248.52	5289.05	5057.74	5070.08	5162.32	5131.93	4953.26	5067.51	5019.22	5108.17	5100.17	4975.07
416	5571.62	5764.01	5680.45	5661.79	5540.49	5584.79	5691.2	5599.74	5869.51	5595.21	5831.3	5633.45	5615.83	5630.72	5728.37	5708.51	5522.01	5682.33	5612.63	5634.12	5722.15	5649.71
417	5906.77	6156.2	6067.83	6081.91	5881.51	6036.42	6023.66	6113.1	6289.94	5873.04	6140.1	6214.92	5998.88	6033.9	6066.54	5994.51	5856.16	5998.03	5952.28	5967.25	5959.65	5946.18
418	6128	6277.48	6217.62	6285.16	6066	6205.72	6138.54	6311.64	6501.7	6158.8	6323.93	6332.15	6148.87	6145.18	6232.92	6133.51	6057.18	6192.44	6054.21	6049.65	6115.15	6186.75
419	6002.22	6282.25	6178.65	6120.59	6082.47	6155.46	6095.78	6169.22	6420.2	6049.57	6181.28	6185.36	6055.36	6098.25	6162.93	5965.59	6005.25	6068.94	6003.09	5992.92	6135.99	6088.17
420	5610.71	5906.02	5717.77	5824.16	5696.32	5797.11	5701.05	5831.78	5967.91	5690.67	5931.22	5857.42	5762.85	5726.37	5770.64	5709.6	5644.06	5698.98	5695.71	5657.28	5695.27	5709.19
421	5142.51	5291.31	5282.57	5225.83	5137.11	5339.78	5185.2	5314.12	5539.9	5160.01	5340.68	5322.1	5206.17	5283.11	5291.02	5106.53	5134.12	5275.21	5191.9	5288.41	5272.26	5188.26
422	4450.24	4580.4	4447.73	4565.57	4617.01	4599.32	4623.25	4676.35	4840.97	4609.72	4710.39	4723.13	4597.98	4592.75	4576.59	4491.12	4491.71	4643.3	4571.35	4634.73	4638.05	4611.88
423	3732.16	4005.83	3793.6	3911.12	3902.82	3929.82	3939.15	4019.64	4148.22	3840.22	3924.88	3976.56	3986.31	3957.23	3954.71	3871.5	3792.58	3997.94	3971.59	3856.65	3970.46	3967.53
424	3102.19	3334.5	3203.28	3211.07	3225.2	3246.19	3222.11	3410.3	3469.78	3290.55	3387.95	3338.74	3309.1	3277.75	3313.69	3269.18	3317.22	3352.92	3278.08	3367.29	3410.87	3230.56
425	2523.71	2673.87	2670.96	2631.47	2711.76	2715.64	2783.4	2809.44	2908.03	2770.78	2863.38	2891.44	2792.93	2700.78	2804.34	2717.74	2788.4	2802.39	2739.75	2796.84	2801.59	2806.41
426	2025.95	2279.89	2191.12	2233.25	2294.47	2326.87	2366.78	2477.61	2549.33	2340.84	2404.08	2467.18	2401.2	2276.62	2422.13	2337.21	2381	2412.4	2371	2376.77	2404.03	2453.4
427	1705.96	1919.06	1777.65	1947.62	2054.43	2016.43	2092.12	2112.88	2296.17	2084.27	2153.36	2141.78	2075.32	2020.41	2071.24	1996.85	2080.39	2230.37	2029.8	2106.98	2196.69	2107.93
428	1456.98	1722.39	1617.31	1718.18	1808.13	1864.19	1895.61	1924.59	2052.97	1851.3	1903.37	1975.21	1882.57	1832.05	1892.72	1896.13	1885.46	1904.09	1850.81	1858.34	1969.78	1954.26
429	1357.78	1641.8	1485.25	1595.98	1681.19	1723.43	1785.13	1835.8	1883.83	1801.89	1766.38	1866.89	1787.7	1770.09	1746.79	1743.75	1745.67	1819.48	1726.99	1877.43	1863.15	1846.75
430	1295.4	1477.08	1474.12	1509.88	1638.09	1730.61	1765.28	1777.51	1831.42	1766.87	1772.02	1843.47	1718.09	1737.28	1709.2	1691.12	1706.04	1827.82	1711.61	1750.63	1835.06	1732.25
431	1195.01	1491.82	1444.87	1499.98	1578.09	1674.94	1706.76	1772.03	1782.71	1718.15	1749.75	1785.14	1723.57	1689.14	1757.9	1726.55	1699.68	1782.44	1763.73	1770.82	1834.96	1755.28
432	1165.35	1496.29	1414.4	1403.77	1575.7	1663.77	1703.29	1672.84	1851.71	1744.83	1717.37	1737.38	1762.72	1617.65	1718.04	1706.14	1600.94	1805.31	1744.64	1765.81	1832.96	1742.67
433	1221.58	1497.09	1369.5	1491.8	1638.41	1619.19	1685.45	1745.3	1795.82	1673.3	1740.62	1800.99	1715.63	1671.74	1734.29	1733.12	1708.04	1789.95	1730.64	1776	1750.78	1730.72
434	1186.15	1411.8	1432.01	1450	1587.75	1667.41	1719.49	1733.2	1824.7	1703.66	1689.12	1773.09	1702.43	1652.86	1744.14	1687.61	1594.59	1801.7	1752.23	1708.65	1744.44	1796.59
435	1155.39	1444.93	1373.18	1461.53	1586.39	1651.48	1682.15	1770.23	1855.2	1696.43	1688.3	1829.48	1747.48	1734.49	1726.49	1680.39	1628.04	1782.37	1714	1795.3	1783.84	1781.16
436	1188.91	1470.93	1378.14	1429.82	1648.45	1651.6	1726.67	1755.48	1797.76	1726.38	1714.69	1770.77	1749.94	1677.94	1736.02	1692.29	1666.16	1798.75	1703.15	1783.7	1856.49	1743.87
437	1141.19	1466.86	1397.91	1457.1	1557.88	1597.3	1697	1720.16	1830.71	1653.29	1703.51	1811.04	1734.07	1612.15	1689.59	1642.17	1651.64	1737.26	1658.89	1741.15	1778.99	1713.65
438	1153.14	1410.68	1363.82	1497.64	1585.05	1606.94	1657.28	1745.54	1829.88	1663.68	1733.9	1763.61	1710.64	1596.78	1707.58	1689.13	1637.53	1822.93	1711.37	1733.99	1778.67	1786.41
439	1162.61	1442.18	1374.02	1491.64	1573.93	1607.57	1683.8	1743.9	1828.44	1709	1686.32	1732.32	1732.5	1639.61	1709.97	1705.38	1666.26	1779.55	1737	1791.83	1758.39	1792.09
440	1158.59	1421.12	1377.35	1486.65	1616.22	1663.1	1705.66	1782.96	1855.95	1708.7	1809.62	1796.59	1725.52	1664.9	1725.55	1698.67	1652.55	1865.21	1721.44	1750.79	1794.79	1746.07
441	1186.43	1449.86	1347.47	1478.5	1601.66	1634.06	1759.58	1732.48	1861.4	1801.84	1755.83	1784.95	1780.76	1625.09	1734.19	1791.44	1685.81	1818.03	1726.69	1805.2	1797.22	1806
442	1203.57	1496.07	1407.54	1476.84	1648.87	1667.81	1747.03	1763.22	1845.04	1737.93	1800.93	1870.22	1749.5	1730.33	1742.97	1779.34	1697.53	1811.83	1773.84	1812.6	1821.11	1754.21
443	1183.58	1520.89	1400.92	1492.29	1592.1	1720.64	1814.62	1825.96	1887.24	1815.18	1730.47	1834.14	1790.97	1696.2	1795.27	1812.77	1746.49	1878.5	1740.26	1877.63	1884.33	1826.58
444	1250.49	1541.13	1460.42	1606.85	1682.26	1754.94	1848.97	1901.21	1955.03	1836.13	1838.91	1917.7	1829.06	1709.05	1860.46	1812.64	1788.19	1976.06	1814.54	1846.05	1889.04	1881.51
445	1277.58	1536.7	1521.13	1631.03	1704.48	1786.77	1849.03	1942.27	1946.34	1816.58	1852.14	1923.96	1870.47	1812	1862.43	1899.77	1838.38	2045.24	1931.21	1889	1907.31	1890.33
446	1382.02	1658.18	1573.66	1689.82	1767.44	1860.17	1947.62	1962.11	2027.1	1937.2	1956.38	1980.59	1954.02	1846.73	1845.38	1882.52	1855.41	1985.07	1884.45	1953.63	2010.64	1939.25
447	1416.32	1627.69	1608.25	1706.2	1797.55	1820.61	1894.39	2037.21	2100.68	1898.56	1924.88	1988.17	1903.93	1874.4	1999	1936.24	1859.28	2006.54	1936.96	2001.87	1959.35	2017.37
448	1422.83	1656.78	1578.18	1669.92	1830.67	1865.78	1935.77	2011.34	2034.56	1817.32	1914.21	1979.95	1867.65	1843.42	1946.63	1951.54	1858.68	2031.66	1913.53	1951.45	1991.95	1947.2
449	1357.57	1598.3	1516.92	1654.1	1728.59	1825.62	1875.96	2032.65	1975.68	1894.63	1869.7	1982.86	1878.51	1857.28	1890.53	1927.31	1863.14	1992.45	1928.3	1982.77	1933.6	1929.13
450	1329.04	1576.62	1503.68	1543.54	1709.58	1765.78	1839.09	1918.42	1933.33	1828.81	1841.27	1913.48	1838.45	1726.72	1771.25	1849.54	1807.39	1889.74	1838.05	1863.63	1890.19	1902.08
451	1229.67	1502.67	1405.6	1519.95	1632.55	1685.4	1754.92	1914.38	1861.72	1772.52	1700.56	1871.73	1785.22	1685.65	1783.68	1776.51	1761.94	1891.4	1749.74	1870.31	1837.43	1808.86
452	1126.71	1407.8	1385.12	1424.03	1614.37	1608.29	1711.82	1798.68	1834.46	1669.39	1654.34	1776.75	1771.37	1626.78	1729.3	1706.88	1633.53	1777.28	1706.01	1765.29	1760.56	1762.97
453	1086.66	1415.26	1282.37	1425.62	1534.87	1573.75	1673.15	1747.07	1795.67	1639.76	1654.68	1779.85	1628.61	1579.41	1654.51	1695.92	1604.72	1740.07	1655.49	1731.8	1771.2	1717.03
454	1036.54	1386.01	1306.87	1385.47	1516.46	1556.01	1621.55	1631.08	1727.05	1642.14	1611.03	1686.57	1607.65	1578.08	1574.62	1622.98	1631.21	1680.45	1598.12	1643.14	1690.4	1658.93
455	1013.07	1375.55	1283.37	1352.95	1492.69	1563.57	1547.9	1671.34	1692.18	1578.67	1605.02	1674.62	1649.66	1548.6	1620.04	1604.73	1540.38	1680.4	1605.05	1643.12	1666.56	1640.67
456	1029.49	1345.07	1276.68	1362.14	1459.13	1517.89	1577.24	1650.05	1695.96	1558.47	1572.1	1620.57	1609.83	1532.21	1593.64	1603.98	1553.39	1653.73	1608.5	1623.54	1618.87	1648.5
457	982.44	1363.88	1251.99	1297.96	1445.18	1534.91	1550.09	1570.4	1680.31	1547.49	1608.64	1684.6	1534.33	1526.52	1560.41	1580.9	1553.37	1634.41	1550.13	1632.72	1650.89	1636.86
458	1032.65	1403.16	1255.28	1393.25	1509.01	1512.63	1550.46	1626.62	1713.16	1567.91	1571.34	1613.11	1569.54	1544.77	1598.49	1570.29	1545.48	1639.09	1589.18	1638.26	1598.11	1546.29
459	1016.33	1320.14	1279.42	1342.51	1469.14	1536.08	1581.43	1606.14	1653.12	1489.39	1554.72	1673.32	1559.51	1529.99	1562.22	1540.65	1543.11	1587.01	1521.06	1627.75	1635.3	1558.46
460	998.178	1387.28	1215.02	1343.98	1479.84	1513.08	1530.42	1610.83	1662.62	1506.39	1526.76	1558.93	1570.79	1537	1576.52	1532.59	1473.67	1558.51	1517.79	1568.85	1607.21	1631.78
461	1003.82	1358.21	1245.77	1368	1455.47	1495.51	1556.34	1574.95	1602.5	1510.39	1511.53	1660.9	1504.89	1491.6	1521.05	1532.98	1498.11	1590.86	1511.24	1575.57	1574.98	1629.05
462	1013.55	1282.69	1278.62	1248.92	1427.79	1442.26	1534.82	1587.07	1606.29	1553.14	1559.49	1601.89	1545.85	1528.78	1509.76	1535.92	1476.58	1597.72	1523.61	1564.22	1579.53	1586.16
463	994.387	1302.29	1203.16	1340.12	1495.34	1543.68	1559.68	1560.28	1667.41	1507.65	1549.45	1532.7	1495.43	1456.51	1510.57	1541.96	1434.06	1600.07	1569.39	1572.07	1550.46	1558.46
464	996.415	1322.18	1230.28	1310.49	1416.79	1424.23	1532.01	1577.71	1587.6	1550.15	1477.55	1561.21	1506.36	1477.28	1508.81	1523.91	1452.19	1512.42	1487.04	1508.89	1578.36	1547.95
465	986.187	1313.67	1203.18	1306.95	1431.2	1428.46	1487.6	1560.62	1553.74	1459.04	1530.18	1547.26	1491.71	1473.83	1484.17	1415.06	1438.83	1588.94	1555.96	1451.52	1547.4	1559.22
466	1019.39	1305.5	1173.33	1264.71	1417.05	1445.23	1570.03	1515.15	1650.58	1492.8	1450.77	1566.74	1464.56	1451.45	1505.54	1495.42	1347.46	1495	1540.93	1568.61	1518.39	1494.87
467	991.534	1315.41	1190.16	1342.7	1386.81	1468.4	1513.39	1514.73	1600.59	1399.67	1465.92	1499.31	1473.45	1413.6	1464.42	1469.13	1436.88	1540.59	1471.11	1459.62	1536.3	1513.52
468	924.931	1290.57	1166.71	1318.35	1447.44	1477.88	1525.13	1437.72	1580.24	1427.91	1451.61	1520.71	1443.48	1429.75	1433.99	1428.19	1452.45	1525.13	1450.92	1490.69	1501.67	1488.05
469	946.199	1285.6	1160.35	1268.99	1391.62	1355.58	1526.37	1464.26	1545.14	1480.09	1468.07	1509.55	1431.85	1366.22	1424.49	1427.91	1430.4	1471.99	1414.97	1470.77	1506.72	1422.66
470	951.174	1233.09	1144.03	1237.31	1408.74	1364.16	1467.05	1487.69	1542.8	1423.87	1420.92	1467.21	1394.72	1327.46	1414.23	1394.03	1359.41	1469.84	1443.91	1416.1	1435.03	1424.38
471	933.51	1282.74	1184.15	1255.72	1348.07	1450.06	1421.64	1421.92	1527.5	1399.83	1409.57	1466.23	1353.93	1326.21	1399.85	1375.72	1344.9	1448.49	1371.94	1420.22	1411.88	1415.43
472	949.543	1237.49	1150.39	1218.57	1330.46	1351.62	1432.97	1373.32	1511.61	1371.76	1408.99	1406.79	1385.95	1370.23	1338.34	1380.5	1320.88	1410.8	1383.48	1421.88	1398.54	1427.3
473	932.619	1198.02	1164.49	1169.53	1328.55	1354.11	1361.37	1371.47	1444.11	1390.45	1373.42	1433.03	1376.73	1292.79	1376.34	1302.42	1267.8	1458.03	1370.1	1372.19	1385.17	1338.15
474	904.785	1199.86	1104.04	1206.95	1308.58	1300.57	1359.66	1339.88	1422.32	1344.52	1320.42	1359.46	1352.58	1285.25	1311.16	1325.93	1264.82	1316.26	1302.76	1326.97	1395.27	1333.49
475	901.203	1200.5	1091.51	1144.84	1283.77	1309.66	1338.5	1373.55	1405.11	1223.71	1312.81	1384.97	1269.54	1251.92	1325.23	1329.08	1236.18	1349.53	1304.83	1376.86	1321.91	1289.23
476	881.858	1170.35	1103.07	1135.05	1229.57	1311.91	1365.08	1359.28	1416.38	1277.4	1292.16	1350.95	1290.34	1227.4	1275.22	1244.97	1254.39	1329.83	1296.04	1346.75	1328.9	1290.33
477	853.719	1192.46	1053.62	1125.48	1229.01	1347.51	1332.35	1313.52	1378.9	1251.89	1266.27	1320.7	1251.36	1237.54	1304.86	1231.62	1204.42	1314.62	1246.31	1293.1	1299.83	1325.53
478	874.186	1193.63	1032.28	1076.41	1204.91	1246.94	1288.05	1325.53	1357.3	1277.04	1266.79	1283.43	1284.62	1242.43	1295.37	1241.9	1235.39	1289.72	1265.35	1283.31	1292.75	1301.76
479	867.885	1182.41	1047.92	1097.02	1262.79	1273.26	1316.05	1325.29	1387.47	1227.43	1240.89	1377.93	1249.9	1203.59	1253.09	1222.91	1181.58	1333.56	1237.45	1265.58	1293.59	1253.99
480	874.807	1145.44	1043.7	1157.38	1168.73	1207.42	1260.93	1270.71	1331.93	1237.97	1248.8	1324.7	1210.01	1202.62	1187.92	1235.71	1194.48	1310.88	1191.51	1278.33	1235.69	1226.81
481	850.329	1181.93	1057.69	1064.01	1177.31	1187.39	1241.14	1241.56	1285.58	1205.38	1200.69	1240.02	1157.41	1188.8	1206.82	1222.45	1209.86	1291.86	1178.99	1230.7	1233.93	1239.53
482	839.085	1128.05	1090.99	1105.8	1233.54	1156.79	1264.76	1247.82	1311.13	1215.09	1219.7	1319.34	1172.71	1156.13	1188.4	1191.84	1156.37	1249.59	1210.55	1260.41	1216.53	1212.65
483	862.529	1156.86	1015.28	1034.38	1148.96	1197.79	1241.41	1204.42	1232.3	1220.42	1208.69	1253.71	1161.08	1114.59	1221.11	1152.57	1167.92	1248.25	1162.53	1249.4	1192.54	1196.86
484	883.901	1125.6	1008.34	1089.91	1149.53	1163.02	1214.53	1223.12	1226.26	1181.16	1168.01	1225.24	1119.66	1137.34	1169.31	1096.5	1139.92	1194.93	1129.73	1201.82	1241.68	1211.67
485	801.398	1100.85	963.488	1057.61	1119.37	1127.67	1196.69	1178.51	1244.66	1134.64	1167.31	1181.08	1123.81	1079.04	1109.69	1104.21	1112.6	1166.48	1153.4	1156.08	1193.79	1137.05
486	807.956	1064.5	952.983	1047.42	1078.12	1123	1154.92	1155.57	1227.07	1104.56	1125.37	1152.86	1091.04	1102.02	1116.47	1077.57	1081.82	1180.15	1090.33	1170.53	1107.14	1108.2
487	834.116	1093.26	956.486	1025.55	1092.51	1103.33	1129.46	1176.47	1205.5	1101.75	1084.59	1191.54	1040.05	1066.93	1084.9	1043.3	1075.12	1111.66	1113.16	1138.46	1132.15	1114.07
488	814.237	1060.1	914.836	1002.49	1108.37	1098.72	1134.49	1097.77	1182.11	1067.19	1111.27	1137.77	1123.44	1083.4	1075.1	1013.24	1042.69	1108.58	1068.4	1114.11	1113.45	1119.98
489	822.102	1010.94	970.649	960.032	1070.94	1118.92	1126.49	1120.65	1225.76	1068.72	1074.78	1156.08	1055.18	1014.97	1034.69	1066.39	1013.84	1068.72	1084.44	1048.69	1083.85	1129.71
490	755.252	1073.22	950.715	971.876	1098.74	1083.21	1149.53	1129.66	1142.24	1086.72	1044.04	1131.31	1071.67	1011.8	1125.58	1040.66	1064.06	1122.45	1056.24	1144.17	1116.75	1049.48
491	782.42	994.949	914.821	1002.99	1048.2	1095.29	1116.2	1125.21	1153.43	1056.46	1061.88	1115.81	1024.29	1017.14	1042.08	1083.22	966.911	1068.59	1056.19	1116.49	1053.21	1067.6
492	792.102	974.393	917.706	939.143	1046.67	1068.65	1110.63	1085.82	1137.04	1097.75	1069.61	1088.23	980.641	990.155	1035.19	997.853	985.092	1069.1	1026.11	1028.92	1085.89	1055.53
493	790.642	1000.88	917.28	914.976	1013.38	1045.47	1077.13	1035.77	1112.52	1014.28	1007.5	1074.59	1031.4	965.374	979.769	999.888	961.245	1010.45	994.777	1050.64	1020.01	1006.89
494	742.211	945.74	886.892	925.007	986.828	1038.67	1015.57	1020.54	1057.81	1005.74	1056.09	1065.54	953.151	946.135	991.187	1002.74	961.892	1013.79	980.497	1033.41	1034.74	1004.67
495	744.536	1006.26	872.083	994.021	1012.48	1016.81	1036.89	1039.63	1030.76	976.232	979.15	1040.08	984.021	935.318	988.778	953.127	925.48	1001.42	942.685	987.123	1012.43	975.222
496	729.505	954.056	880.17	900.232	1029.45	985.343	1035.91	1003.01	1040.37	956.935	985.426	994.04	911.553	925.235	921.03	938.153	915.692	987.08	995.405	984.648	1027.21	952.299
497	763.259	955.845	886.186	891.515	953.569	977.698	957.511	965.532	1027.26	980.232	944.326	989.741	904.55	903.908	921.514	914.945	862.399	941.663	908.491	976.888	973.63	952.533
498	772.145	939.509	840.76	841.932	951.84	980.373	998.396	975.579	1015.35	931.201	932.64	924.027	929.157	908.643	911.094	901.506	893.788	998.178	943.283	939.921	931.098	937.57
499	725.481	925.671	860.838	859.999	962.312	961.025	923.801	1020.49	1022.67	900.007	924.362	954.163	908.369	874.816	895.217	871.971	874.332	951.854	884.561	952.946	908.372	910.635
500	704.046	910.958	816.673	873.72	964.775	932.706	961.18	969.301	1010.86	921.778	931.9	908.173	873.409	838.98	897.57	884.005	869.397	902.631	903.436	948.484	924.037	942.281
501	705.391	897.262	821.1	833.853	907.338	924.426	944.972	948.735	947.607	889.058	879.055	928.989	825.453	836.823	887.686	896.206	849.791	866.356	888.508	885.882	898.486	925.129
502	712.234	877.316	772.73	840.69	932.058	891.864	930.432	882.361	904.592	893.063	918.218	885.656	807.101	819.209	866.354	851.04	858.403	909.78	893.67	923.669	874.728	847.762
503	694.875	928.619	813.478	810.692	912.945	874.303	937.665	929.01	985.849	902.579	831.715	929.026	813.856	806.654	841.803	848.242	837.158	884.529	871.632	867.682	866.905	881.538
504	695.582	907.844	772.482	804.238	846.864	854.496	905.376	932.268	986.216	863.373	894.603	878.028	838.019	741.732	844.431	824.821	778.567	871.009	846.957	844.698	870.407	851.119
505	662.296	866.186	781.385	793.749	860.164	891.958	885.004	880.143	888.99	845.603	834.285	863.848	792.446	809.588	815.681	806.609	805.075	864.434	819.869	875.482	871.153	884.339
506	656.531	837.525	762.63	789.53	852.486	814.393	898.465	868.052	896.693	849.823	830.978	894.97	789.478	785.316	799.191	820.974	794.68	869.205	819.548	877.279	837.804	825.653
507	635.016	867.725	714.031	795.543	898.17	858.683	899.973	864.893	908.862	848.15	799.362	874.027	794.154	777.462	798.22	806.298	765.857	801.204	786.859	835.753	804.897	836.289
508	632.225	842.058	724.09	770.554	829.603	865.435	902.925	829.736	895.464	785.251	749.792	841.816	796.887	729.713	769.632	774.861	776.616	799.329	811.239	812.439	830.84	835.175
509	683.168	799.494	689.906	721.076	826.042	827.029	861.661	831.729	816.44	781.245	767.122	794.579	803.383	757.792	798.345	779.173	745.756	830.713	772.248	797.825	762.7	760.958
510	651.67	804.605	696.723	769.107	796.837	799.083	885.133	827.756	839.121	774.677	762.536	814.446	716.251	740.246	776.454	753.867	755.041	776.956	746.521	767.121	769.201	797.643
511	647.275	826.645	709.067	720.472	817.617	800.573	804.361	778.499	831.905	743.448	788.238	819.551	730.336	742.439	758.043	722.649	709.451	802.027	767.657	791.052	814.545	769.523
512	629.483	825.81	702.274	705.286	778.018	797.25	787.682	801.347	860.043	744.595	747.367	835.443	711.358	693.736	749.118	730.854	706.932	773.059	731.94	773.557	777.331	748.607
513	631.408	801.343	677.622	717.26	806.199	770.964	775.368	785.239	794.63	753.151	752.986	810.42	692.052	707.477	734.254	734.105	736.559	772.089	733.341	740.823	741.992	746.527
514	635.327	839.698	703.577	683.445	760.153	768.614	759.394	771.798	789.764	658.504	774.011	751.634	713.567	685.483	738.843	708.847	702.481	726.139	707.308	764.548	709.339	722.739
515	588.9	805.459	698.048	697.224	757.631	767.89	814.714	771.966	793.096	704.707	730.227	773.61	665.801	680.314	728.148	693.033	679.807	731.695	731.34	693.643	722.395	723.216
516	584.758	765.915	662.866	690.483	709.439	730.611	767.862	752.642	800.566	721.581	687.953	736.349	647.304	686.626	686.07	653.969	707.856	704.971	703.574	684.395	690.276	713.998
517	632.196	760.371	670.597	692.194	720.083	706.544	768.544	762.394	762.602	700.861	723.872	703.001	650.461	676.174	656.912	680.284	679.535	719.491	714.604	726.045	694.661	664.508
518	605.148	736.226	637.88	664.955	722.314	704.407	713.813	716.275	767.671	683.976	667.356	752.179	662.723	642.703	665.35	652.012	646.005	740.139	672.592	646.927	721.751	670.26
519	580.638	727.294	663.318	681.514	720.316	732.096	750.597	745.768	745.089	677.306	708.307	701.669	639.906	614.962	662.483	623.901	644.614	665.221	660.263	690.63	705.706	672.416
520	555.652	704.561	671.081	640.779	733.424	707.648	696.6	683.973	742.777	657.517	725.665	719.202	617.789	604.071	657.918	670.452	605.083	677.788	655.337	681.931	665.765	655.01
521	592.943	732.026	635.739	647.294	710.434	675.593	712.927	700.781	721.939	637.966	654.586	701.275	644.095	612.605	673.351	604.164	660.103	669.841	635.695	685.251	664.874	647.292
522	591.503	718.937	625.159	631.774	713.902	693.762	699.645	740.546	731.637	628.613	684.38	679.951	600.01	626.892	647.376	631.548	648.979	654.736	605.322	685.544	634.602	682.566
523	602.952	679.906	639.956	650.487	698.459	698.628	744.348	687.681	730.778	658.097	652.005	701.71	580.394	633.231	656.816	619.82	628.648	661.777	647.086	640.421	626.952	674.603
524	615.071	703.911	651.533	642.654	708.393	675.972	695.243	677.492	719.148	670.299	645.866	679.472	651.648	637.683	630.592	619.545	629.558	697.065	606.275	700.66	645.907	687.264
525	605.433	721.185	654.974	641.483	680.092	688.058	736.506	722.117	720.995	693.452	694.105	727.587	624.536	620.809	647.003	627.156	629.321	678.566	667.997	690.13	666.968	692.995
526	676.501	766.318	674.553	662.03	780.622	718.849	758.104	731.433	739.733	696.05	692.77	695.862	650.421	655.302	665.553	687.742	663.338	689.481	657.679	668.985	715.783	637.556
527	671.934	750.048	651.87	683.728	741.678	689.372	770.791	705.469	783.857	695.75	716	714.837	694.209	648.661	682.328	645.475	683.589	735.81	716.249	708.844	705.834	680.555
528	683.044	783.671	669.576	715.875	782.79	756.333	815.009	792.75	734.457	714.219	743.403	740.959	714.065	695.969	693.09	754.88	639.045	766.538	697.598	758.338	716.425	741.225
529	731.439	784.21	722.767	737.954	777.081	787.337	808.769	807.433	803.941	757.392	744.318	757.794	671.977	693.452	681.634	713.452	695.858	791.544	714.923	784.779	731.431	695.037
530	751.549	807.203	749.774	734.762	795.672	798.522	783.378	779.062	799.265	711.787	739.688	807.934	720.125	699.993	714.372	720.331	705.62	821.632	693.01	722.621	739.251	718.507
531	750.609	821.182	718.502	742.614	767.06	754.272	788.97	728.313	779.462	684.288	701.851	697.989	698.206	691.726	733.616	692.097	718.246	686.527	701.745	712.721	758.029	725.166
532	675.92	762.397	707.239	710.459	709.168	754.479	727.856	778.65	726.081	709.348	715.279	756.037	690.299	683.655	685.782	665.959	661.57	652.748	713.16	728.277	677.482	684.192
533	669.486	712.65	641.258	667.67	714.877	662.862	695.869	747.05	706.681	646.415	679.434	729.17	613.365	620.311	635.209	641.829	613.035	680.228	665.696	628.626	664.246	720.539
534	575.895	685.622	625.259	579.732	649.702	637.312	667.534	689.895	694.157	622.581	634.075	669.621	574.15	594.413	612.997	585.126	611.876	638.445	561.044	620.017	617.213	640.737
535	546.849	667.245	594.392	594.803	579.975	641.289	641.169	632.496	649.3	569.189	596.77	627.68	578.851	555.899	564.2	571.738	548.334	595.956	557.106	551.378	577.47	595.226
536	538.01	645.538	521.34	547.115	586.751	596.342	552.336	607.763	625.888	558.536	558.109	620.881	499.398	488.677	552.993	534.619	555.397	589.072	578.854	552.217	549.869	536.345
537	503.61	587.411	514.211	560.76	600.57	576.607	585.756	592.825	559.455	549.906	523.928	546.566	478.263	532.367	527.609	516.004	545.256	543.308	520.255	524.313	546.626	525.45
538	489.801	585.978	524.999	522.776	566	585.813	583.099	553.927	589.442	529.269	546.29	547.299	457.109	464.853	479.136	525.251	495.759	537.391	524.984	516.713	497.978	517.65
539	455.718	561.654	494.07	508.217	551.48	541.306	553.93	564.189	522.102	544.183	505.965	560.553	450.444	484.274	492.826	500.517	472.956	504.805	467.592	530.968	507.167	523.706
540	469.846	585.925	497.125	465.2	513.906	534.807	518.264	541.423	548.948	518.369	474.441	519.136	475.677	500.838	473.972	463.539	505.157	530.211	482.91	520.66	518.999	487.713
541	483.022	582.315	488.405	471.531	499.599	508.528	530.642	539.646	537.056	508.168	514.323	504.824	469.824	462.552	485.434	479.945	483.44	518.797	483.342	491.446	493.449	437.271
542	459.972	519.674	483.685	494.561	536.485	508.66	532.981	509.387	558.244	512.955	504.553	531.621	474.591	499.02	481.731	472.207	441.617	499.738	476.428	506.221	500.782	470.959
543	477.581	541.811	479.449	478.774	533.49	532.199	555.025	527.442	533.039	523.448	490.17	531.948	436.547	464.183	451.435	464.501	465.71	503.818	462.302	487.815	487.007	487.707
544	462.467	534.741	462.439	480.937	536.16	516.431	521.434	534.147	539.878	483.1	487.124	521.175	411.967	447.16	469.59	416.747	467.478	499.112	465.595	497.293	480.166	463.036
545	506.097	523.501	485.974	487.33	494.022	482.923	530.111	529.579	500.429	480.223	471.99	504.519	439.711	476.613	429.957	474.935	456.751	441.109	467.727	473.286	503.08	445.665
546	487.354	530.908	464.924	458.813	502.554	500.606	546.197	518.229	528.78	454.995	475.752	511.461	428.191	454.393	452.71	461.314	470.901	487.474	429.121	460.533	473.24	451.919
547	463.361	542.55	483.704	471.31	496.23	481.676	493.92	473.458	507.864	465.731	473.114	481.822	441.6	428.863	472.623	439.253	448.124	462.615	455.859	438.84	460.61	457.299
548	470.193	553.558	488.667	446.878	481.144	495.109	499.443	484.334	525.477	455.149	454.52	469.092	441.894	466.379	461.716	425.504	435.326	457.768	407.126	446.313	489.384	430.64
549	444.939	510.485	476.44	467.042	508.065	490.679	463.85	514.067	498.138	459.404	423.691	465.497	430.705	434.377	469.283	429.522	442.228	477.86	464.386	444.552	458.352	461.62
550	464.483	519.507	445.764	463.462	461.732	455.595	483.204	492.961	490.596	428.988	469.505	473.517	429.809	405.139	429.382	429.4	422.408	442.39	384.765	499.79	422.735	425.613
551	416.383	501.221	443.716	444.616	472.804	462.942	464.393	460.69	472.593	441.875	489.379	451.278	404.651	410.824	432.307	406.757	424.233	461.748	435.529	437.789	428.593	441.845
552	455.079	494.72	441.248	415.744	499.877	484.722	434.417	476.115	509.811	421.979	422.178	431.127	423.464	432.679	435.303	423.402	443.215	441.823	416.883	452.931	447.45	405.388
553	427.884	465.55	424.25	432.909	462.521	476.105	452.11	430.428	472.211	468.645	465.667	433.144	389.37	419.474	404.117	410.991	423.876	421.896	409.364	421.142	432.72	440.979
554	426.338	484.264	408.353	421.665	491.72	488.276	441.206	475.585	475.909	459.503	407.809	419.17	381.964	409.765	384.582	410.325	395.883	421.483	380.955	436.047	396.656	446.445
555	425.199	499.438	456.56	432.478	444.588	429.091	464.042	487.382	433.556	445.298	467.201	450.333	403.925	377.247	416.718	386.836	410.494	422.094	440.676	436.75	451.93	393.881
556	413.43	488.233	440.797	391.459	431.295	492.223	476.284	461.607	444.86	413.504	409.614	407.93	365.8	413.422	403.048	445.566	387.649	422.513	424.267	423.348	407.287	430.606
557	404.271	485.85	435.478	413.53	411.595	440.313	453.682	461.363	450.547	389.261	397.427	438.848	364.084	383.283	413.044	392.385	391.299	427.349	392.621	390.122	418.401	445.579
558	449.919	497.161	400.666	394.468	454.623	421.321	384.918	396.613	463.841	426.254	435.707	438.394	385.672	401.068	420.207	394.844	432.539	430.382	433.77	432.135	410.396	452.886
559	437.068	471.209	417.696	446.803	428.582	435.91	478.535	443.625	498.762	436.531	420.19	424.266	379.527	398.443	398.822	391.533	417.654	455.377	415.774	413.774	406.045	407.181
560	448.869	507.912	462.436	384.669	480.747	481.981	419.724	461.184	485.62	447.133	495.175	443.031	419.432	412.588	405.443	408.951	408.11	457.572	414.421	459.786	472.201	459.597
561	474.86	494.523	466.191	461.223	493.899	458.845	509.022	470.289	508.714	445.864	470.098	447.246	424.788	410.155	397.91	449.213	432.891	457.852	456.721	455.283	484.656	464.565
562	526.941	542.685	495.213	472.919	550.893	518.854	521.06	484.604	536.513	477.335	458.952	515.622	490.912	473.307	441.287	435.978	488.097	499.24	464.906	471.141	487.231	510.165
563	541.032	547.486	534.81	507.309	553.195	503.653	537.817	529.459	528.889	474.876	533.324	536.898	471.646	502.487	514.876	464.146	466.838	554.622	520.068	495.852	501.157	516.478
564	597.779	586.898	555.381	524.697	571.714	567.822	596.712	552.777	550.239	567.523	550.148	569.994	469.484	537.951	513.73	536.672	531.482	591.397	548.334	500.671	504.558	508.267
565	686.166	632.38	567.53	555.365	555.641	573.328	587.827	623.012	590.364	524.621	583.444	593.818	507.715	542.859	552.137	541.634	538.814	604.15	535.84	612.537	592.454	552.336
566	645.189	625.738	608.67	584.703	594.061	581.848	637.147	658.961	611.923	615.388	597.045	610.63	546.648	564.369	567.328	539.8	575.353	648.382	580.036	593.526	576.927	610.708
567	660.417	642.168	615.435	578.651	587.135	594.844	634.854	672.767	643.022	596.005	609.602	590.515	537.481	590.889	579.585	539.126	549.612	619.875	636.121	600.169	594.212	553.062
568	653.357	598.277	601.184	584.741	576.415	619.308	613.75	652.897	603.908	544.244	580.942	627.641	517.006	583.621	559.593	550.127	570.011	620.456	595.109	553.074	539.533	560.705
569	604.805	626.794	549.6	537.38	539.217	544.635	610.078	629.291	607.931	566.439	562.158	608.002	474.243	517.964	502.612	558.648	570.425	564.044	516.685	544.701	561.633	558.441
570	528.782	571.253	493.772	495.209	556.638	546.802	549.395	595.216	517.576	516.363	506.468	569.755	470.101	489.325	481.803	502.278	511.093	503.96	514.992	510.349	475.57	511.074
571	499.33	489.165	439.601	476.386	463.303	482.115	524.167	505.136	496.372	493.133	460.525	506.551	438.239	416.658	472.818	458.629	464.874	458.75	472.407	499.131	455.362	429.125
572	487.435	471.91	438.865	409.97	447.286	405.923	454.641	494.665	511.6	433.607	426.199	476.154	421.054	407.096	405.822	428.53	435.575	446.561	421.256	405.347	436.278	417.037
573	449.2	456.591	413.036	421.765	377.287	423.834	420.539	457.74	409.408	408.033	381.597	408.902	362.737	371.401	393.842	392.269	379.156	364.496	403.276	404.14	387.893	394.753
574	394.54	423.685	376.179	396.329	447.466	391.259	411.314	422.639	405.129	385.125	385.679	420.084	339.582	343.13	332.835	320.635	335.048	397.995	364.729	420.337	375.223	387.031
575	406.353	422.862	393.128	371.561	393.825	363.698	378.057	425.008	360.763	360.283	342.653	374.68	351.487	349.824	362.535	366.395	359.375	383.131	370.51	394.892	351.434	416.462
576	379.519	402.709	363.884	364.992	412.188	358.064	391.854	401.021	378.902	337.283	405.649	362.891	369.033	338.403	383.071	368.712	352.469	378.1	339.028	322.325	364.364	385.468
577	398.822	378.284	372.263	364.367	397.799	375.485	375.998	409.845	366.02	354.912	345.451	332.368	320.885	357.443	343.375	358.303	313.417	362.059	350.858	322.557	393.722	328.259
578	360.808	407.341	360.011	381.484	386.369	364.81	391.212	389.444	368.832	372.557	390.797	359.506	316.825	306.817	369.007	338.023	350.057	341.796	347.304	362.017	352.502	374.174
579	385.633	389.755	362.148	360.037	379.517	347.582	351.031	378.865	404.006	340.426	361.885	340.302	305.437	342.94	317.274	336.641	353.815	362.16	378.174	333.537	368.204	341.017
580	399.803	420.354	368.749	334.639	399.088	345.73	339.723	377.34	365.2	342.272	338.153	343.203	357.045	321.357	349.656	361.212	322.749	357.583	319.662	357.642	348	366.251
581	344.939	376.796	362.453	358.731	370.017	369.176	384.622	369.34	375.6	324.203	357.681	333.02	331.551	328.441	313.927	306.933	324.344	340.777	306.863	337.576	368.057	323.95
582	357.111	389.324	356.199	327.207	357.294	345.133	361.445	350.876	390.93	339.306	354.927	326.421	296.852	330.346	324.167	348.757	314.646	377.09	321.298	353.48	341.775	361.883
583	385.358	381.198	354.405	345.877	392.348	391.053	389.887	350.012	379.216	367.8	346.415	345.113	317.5	329.241	348.848	346.663	314.39	396.586	331.616	360.328	351.187	311.988
584	328.948	369.194	367.787	382.692	391.832	372.279	354.804	349.036	344.341	344.89	326.274	350.858	290.166	353.242	359.316	333.234	349.69	343.729	324.91	313.939	361.74	333.761
585	392.519	434.951	356.593	340.833	353.001	371.576	374.242	370.447	381.918	334.736	377.185	347.059	313.138	345.418	305.975	337.98	305.725	388.376	342.312	329.216	306.157	342.59
586	384.241	378.147	357.692	391.879	358.523	354.433	345.322	363.655	407.643	351.399	307.496	367.362	333.633	322.775	347.047	330.795	339.843	345.531	344.958	360.495	352.059	346.51
587	393.28	424.031	331.575	334.272	380.871	379.941	355.718	361.641	364.183	365.307	315.104	374.488	275.007	310.557	295.633	333.584	315.303	348.477	336.85	317.973	372.792	345.479
588	375.253	409.931	339.206	369.385	363.514	350.704	362.923	345.065	359.215	345.574	359.324	339.156	330.244	307.009	318.254	320.515	320.04	330.285	322.692	305.693	329.065	328.343
589	349.996	389.561	369.537	325.973	345.868	358.536	345.712	382.793	415.79	322.4	384.049	354.861	319.806	315.622	352.917	328.148	319.584	372.21	340.4	326.27	336.739	347.002
590	387.511	370.948	373.563	340.429	374.563	370.421	357.218	356.744	336.148	363.497	332.773	338.404	333.538	328.504	321.879	338.003	320.096	357.78	343.334	334.078	320.066	298.888
591	392.713	426.231	332.575	319.134	375.968	344.306	379.184	367.789	416.63	364.417	292.96	343.495	325.042	331.466	288.661	337.877	330.749	332.078	347.316	324.875	351.315	352.599
592	356.598	366.173	379.886	359.241	360.988	362.545	347.294	374.037	375.33	321.206	314.952	328.869	314.465	289.933	326.338	300.481	348.876	353.539	328.661	334.76	333.806	337.065
593	373.646	372.293	328.014	372.485	344.609	357.515	358.75	392.581	312.994	339.561	344.523	324.411	290.056	314.247	311.648	316.674	342.664	340.796	325.363	341.544	294.848	342.078
594	413.291	416.182	373.721	345.626	358.693	369.654	357.475	385.33	358.945	295.284	383.711	300.164	305.867	291.207	322.187	346.458	303.428	333.997	334.3	322.912	337.026	351.074
595	380.454	379.2	340.372	316.178	359.265	356.816	347.378	381.043	338.069	315.52	302.712	320.493	295.649	292.286	361.465	330.812	315.244	373.64	324.152	327.831	322.7	345.154
596	420.985	398.983	352.579	307.271	368.417	360.756	367.096	379.86	375.764	290.134	330.483	337.081	313.226	320.442	319.818	332.459	327.449	367.059	322.393	318.943	343.45	344.856
597	376.679	389.853	347.359	336.283	356.937	345.921	351.215	382.381	355.71	332.242	347.332	334.525	290.949	288.748	306.713	333.401	373.523	315.421	302.498	341.099	331.477	332.896
598	363.137	375.355	316.505	312.779	370.825	350.018	407.288	382.685	377.113	339.539	332.315	333.216	318.406	316.301	323.626	318.042	319.522	342.254	299.782	324.43	307.438	311.976
599	399.691	371.439	326.957	345.857	367.701	391.015	365.2	354.793	379.327	335.156	326.836	314.777	332.15	321.688	327.81	314.267	291.738	344.512	356.547	272.649	330.263	335.915
600	365.697	354.318	363.291	339.355	351.715	390.189	350.935	375.386	370.574	353.784	327.565	309.02	309.886	336.746	347.342	300.571	318.784	325.65	336.465	342.53	346.499	296.836
601	397.091	398.838	337.899	347.714	341.546	351.708	344.139	316.867	346.287	343.42	330.336	315.969	346.413	314.987	308.111	315.448	291.32	342.695	342.561	335.509	316.998	321.675
602	355.23	370.154	338.459	371.396	375.352	321.577	388.643	380.346	342.578	331.693	299.636	331.891	313.244	316.459	344.175	306.989	302.675	327.368	292.362	350.68	319.537	318.64
603	368.382	410.107	343.924	333.659	353.185	322.369	339.83	383.831	360.357	309.88	310.09	334.933	331.986	290.909	320.888	312.151	328.028	336.024	343.742	305.186	329.18	297.636
604	407.749	378.38	359.652	341.615	326.246	343.622	344.16	387.681	330.202	332.225	313.21	335.014	295.152	300.846	333.492	316.268	332.395	322.319	349.562	327.698	320.933	292.649
605	394.877	360.508	335.046	324.547	374.879	338.968	325.692	372.072	361.921	310.167	333.721	323.498	278.24	307.348	331.262	296.115	315.863	361.442	327.528	327.334	344.796	328.103
606	371.317	384.264	366.872	325.262	367.003	342.083	354.421	339.937	352.555	321.319	341.456	340.641	295.883	315.925	312.023	311.518	281.484	306.226	329.459	328.039	334.193	359.218
607	387.39	397.158	321.981	362.895	369.042	295.479	344.934	357.255	339.507	326.668	336.474	322.735	312.802	304.683	316.046	322.729	333.578	352.692	332.7	329.234	301.921	314.31
608	406.349	369.706	353.046	351.302	341.208	380.317	346.05	382.051	341.802	371.486	343.425	368.081	343.442	330.236	325.161	339.044	322.69	331.246	289.402	345.727	326.163	327.951
609	383.556	364.143	370.684	344.24	369.503	303.873	352.96	376.318	343.069	351.27	381.269	341.938	337.328	347.85	338.943	332.794	331.801	372.176	339.28	380.309	353.768	318.972
610	382.78	372.74	338.744	385.915	329.125	334.101	370.058	398.158	385.318	347.564	388.677	350.489	343.376	329.697	344.052	360.446	325.651	331.103	323.331	349.837	355.063	327.105
611	404.833	388.69	385.615	379.118	360.293	362.536	376.63	363.649	395.543	306.017	313.946	383.54	357.999	333.276	357.555	346.081	347.555	350.699	380.929	359.305	369.789	380.11
612	421.318	446.234	388.521	397.786	392.21	377.24	395.663	424.008	385.807	376.219	383.84	348.328	340.616	376.74	367.443	351.333	349.937	405.27	370.196	392.994	384.747	366.91
613	414.495	439.675	380.263	366.244	411.089	344.434	380.87	372.393	420.346	391.367	376.521	412.567	435.84	349.253	367.367	382.314	368.757	408.139	375.581	372.105	386.029	359.348
614	439.512	413.018	392.618	436.861	369.094	376.224	377.063	415.925	390.724	387.537	400.115	382.572	392.065	355.207	396.289	384.761	384.003	357.423	400.743	405.319	374.565	412.3
615	473.838	442.116	406.703	412.438	404.329	435.523	390.88	493.464	475.421	382.333	400.431	382.671	347.296	385.454	411.678	361.473	408.007	412.453	394.375	413.492	432.578	367.611
616	466.272	436.974	453.992	404.347	438.028	388.495	432.439	442.802	415.888	460.03	371.429	353.587	404.245	419.315	367.181	418.928	368.442	422.179	384.364	352.138	435.897	402.538
617	460.022	455.806	415.505	458.721	399.118	423.237	411.077	465.801	450.372	433.914	428.839	407.009	391.734	367.692	380.518	389.875	371.585	433.36	441.148	411.97	413.218	378.234
618	501.385	448.063	415.06	426.35	456.57	408.619	370.94	443.602	441.229	443.945	404.746	405.072	401.359	382.368	433.707	367.945	374.047	376.044	374.75	395.192	401.838	423.496
619	504.371	468.796	431.625	386.6	452.446	433.375	429.79	466.845	449.897	375.771	409.354	405.778	371.979	382.705	370.466	385.758	419.483	440.507	397.35	370.008	453.16	405.836
620	512.923	488.636	390.256	401.727	448.217	456.721	395.598	437.415	400.109	405.727	434.086	441.076	357.223	376.196	425.883	367.257	458.053	444.076	416.506	387.55	423.351	399.595
621	454.556	399.274	422.627	408.821	419.639	391.874	409.636	435.588	385.892	419.653	395.465	392.914	364.111	383.283	367.501	380.711	382.546	435.527	381.704	400.211	336.688	346.339
622	433.874	427.907	335.271	424.075	404.068	409.829	386.806	418.622	442.261	371.729	390.203	406.825	333.563	314.113	368.862	328.525	396.606	374.96	327.829	374.602	333.495	369.747
623	451.226	393.029	400.767	422.031	418.568	432.38	391.365	419.451	437.476	366.216	369.778	360.28	347.073	316.284	346.754	381.463	325.654	394.481	418.096	359.582	363.993	351.725
624	426.308	380.998	390.035	381.187	397.159	401.182	432.386	449.65	420.07	394.512	347.396	347.608	380.787	358.076	320.02	353.298	333.663	430.17	370.733	359.536	382.142	370.015
625	410.082	429.956	335.728	346.164	404.529	300.604	391.568	403.642	368.308	390.741	327.201	443.837	380.919	330.8	405.02	337.006	366.132	379.275	362.305	367.469	346.111	401.462
626	444.46	362.925	389.191	364.287	369.215	387.631	387.426	379.894	343.895	318.763	366.655	381.503	328.991	339.063	374.595	316.221	360.215	392.22	358.992	348.543	345.951	339.464
627	413.951	428.885	431.201	373.05	373.509	371.919	355.818	411.939	381.055	398.513	362.37	374.457	346.175	322.435	364.114	336.199	339.702	381.021	358.807	348.52	370.604	332.991
628	394.501	427.124	438.077	376.302	341.677	416.233	364.673	410.878	406.433	334.078	360.982	357.017	326.539	382.735	386.408	340.525	384.255	364.939	346.954	343.876	375.087	406.884
629	419.847	416.123	381.451	374.771	364.957	353.603	357.133	418.708	400.842	382.806	395.209	389.481	369.246	327.396	355.341	388.003	361.66	367.742	373.782	370.187	363.021	332.214
630	420.455	419.647	393.32	377.705	425.873	356.35	388.41	440.153	392.253	360.094	362.548	314.33	367.467	363.309	388.382	324.243	365.798	466.076	347.74	359.424	341.453	371.106
631	393.98	337.501	383.048	374.552	384.152	368.382	350.139	443.74	345.534	379.625	346.937	385.197	377.769	383.303	391.456	383.342	359.159	397.856	342.677	371.387	393.111	335.322
632	432.041	368.778	401.459	375.954	376.365	406.496	413.027	424.512	406.531	386.949	366.231	379.017	337.175	378.498	343.261	394.489	399.039	424.637	388.921	365.213	393.26	396.797
633	472.421	411.591	398.645	406.851	410.303	375.719	402.295	437.433	419.289	438.479	409.387	392.841	388.72	362.378	356.996	396.224	375.934	412.85	341.886	377.444	352.628	414.146
634	447.241	408.938	381.775	404.255	359.203	425.782	362.85	483.788	436.931	360.041	430.296	416.657	363.351	342.91	341.011	348.564	336.055	422.604	422.622	385.21	393.756	403.52
635	493.862	379.411	443.402	358.737	322.772	374.28	407.533	486.754	382.093	413.212	373.633	409.271	385.806	379.566	384.272	425.25	338.737	357.031	363.37	380.461	374.468	415.019
636	469.903	413.142	433.139	398.603	381.335	454.686	393.142	468.825	387.083	376.008	397.977	365.923	363.019	428.534	349.512	386.592	382.259	384.62	392.752	395.251	398.664	379.616
637	442.096	426.365	415.974	444.173	384.51	378.984	399.872	425.675	399.883	411.83	429.255	404.979	407.35	369.481	385.112	416.181	372.145	452.095	422.363	416.959	360.643	409.276
638	455.958	434.989	457.393	403.739	450.204	431.461	425.032	440.992	445.644	388.668	414.58	429.906	410.83	414.276	373.063	428.056	386.896	475.861	407.086	412.321	385.607	442.587
639	537.612	442.103	454.745	432.015	459.272	490.137	440.489	524.959	488.053	429.161	387.877	416.526	402.54	422.888	455.84	384.387	434.081	521.018	425.483	448.048	455.137	481.883
640	528.443	527.366	535.198	461.993	424.112	436.737	504.921	533.983	488.612	404.85	441.521	495.972	441.297	429.258	447.513	477.985	459.322	574.981	471.285	440.808	482.126	448.094
641	594.215	623.344	524.634	510.205	570.62	505.275	533.831	515.112	573.347	525.763	510.564	560.568	507.722	537.009	589.952	525.206	489.421	626.379	504.803	503.704	538.304	565.193
642	777.005	600.546	652.853	601.016	650.032	523.939	690.473	647.834	656.426	573.106	567.784	628.791	610.603	605.417	593.842	596.755	594.195	752.812	627.484	575.144	590.903	555.304
643	840.552	712.516	758.582	735.664	721.823	701.639	782.668	757.859	786.829	751.797	691.269	711.267	667.35	741.335	713.913	722.046	703.715	766.913	687.343	706.477	771.703	698.976
644	996.535	860.902	883.51	790.857	876.165	811.194	825.473	854.344	879.492	728.616	841.381	891.382	792.616	809.037	844.878	833.367	805.357	979.813	874.16	895.734	887.472	877.157
645	1134.68	1034.92	1003.57	999.08	970.488	991.238	1036.2	1054.22	971.071	1004.53	975.178	1025.02	995.904	945.683	983.44	951.22	941.665	1240.73	1009.94	1000.79	994.54	923.247
646	1310.41	1106.84	1171.78	1063.89	1258.7	1192.21	1139.08	1159.94	1202.7	1130.81	1074.39	1197.22	1169.97	1206.22	1135.04	1184.83	1082.19	1291.31	1182.54	1293.72	1132.73	1125.14
647	1579.61	1271.97	1302.02	1326.38	1258.55	1224.61	1207.95	1362.64	1366.41	1141.72	1350.67	1214.85	1272.66	1255.92	1345.52	1259.18	1249.23	1436.21	1285.13	1277.79	1207.97	1225.06
648	1716.7	1392.24	1394.21	1357.5	1375.19	1441.78	1357.24	1585.51	1308.15	1390.73	1415.4	1451	1296.34	1380.21	1403.75	1366.37	1378.62	1409.2	1329.28	1405.19	1442.64	1281.66
649	1659.46	1409.13	1315.5	1362.82	1400.51	1350.88	1438.83	1669.65	1411.41	1396.4	1417.83	1445.44	1318.9	1303.77	1335.22	1308.38	1436.46	1489.49	1437.4	1460.49	1477.36	1406.29
650	1710.5	1292.78	1356.62	1388.27	1424.05	1411.6	1435.75	1617.96	1340.25	1342.27	1327.64	1359.54	1213.54	1395.76	1395.81	1373.79	1286.51	1480.52	1310.97	1402.81	1394.96	1433.35
651	1619.98	1251.71	1216.49	1320.97	1326.32	1317.94	1223.61	1568.38	1361.61	1262.82	1273.09	1203.16	1304.57	1240.31	1202.84	1235.37	1295.45	1339.85	1274.53	1261.7	1252.51	1229.14
652	1491.55	1106.58	1204.71	1086.6	1160.73	1088.03	1233.49	1362.14	1180.95	1272.96	1122.41	1100.46	1049.26	1106.28	1106.42	1028.55	1091.69	1288.97	1204.78	1211.36	1198.88	1158.76
653	1325.79	1069.83	1012.81	1082.56	1011.51	982.301	1089.19	1309.53	989.79	935.13	993.695	1041.01	1011.67	922.283	1046.46	997.059	965.147	986.294	957.916	960.152	1001.66	990.513
654	1139.31	952.765	959.034	894.935	919.859	898.886	852.006	1159.11	981.037	796.565	890.377	873.113	901.788	829.185	780.395	825.883	872.726	895.944	828.783	925.724	790.226	843.792
655	897.144	805.641	758.077	778.009	773.824	759.835	632.781	1001.23	816.271	734.672	714.829	723.101	668.065	610.86	702.575	746.5	692.023	755.71	686.864	733.346	717.82	703.589
656	776.777	649.948	608.896	650.226	748.418	643.067	574.48	715.055	686.142	594.12	577.418	565.918	627.02	634.697	587.005	598.136	558.877	670.613	642.392	590.333	595.217	571.694
657	625.463	543.957	585.857	522.16	550.402	612.667	602.51	606.531	592.992	538.976	510.382	538.016	531.805	579.577	535.648	522.561	560.895	589.959	591.414	522.716	531.569	517.915
658	644.583	561.899	564.909	593.487	523.025	498.194	522.73	549.845	468.476	519.345	552.279	462.213	515.718	527.757	547.85	564.943	466.247	561.985	509.281	551.17	525.297	534.292
659	584.112	546.304	507.659	492.294	543.264	538.03	441.188	542.225	536.481	480.458	465.315	451.415	511.188	499.035	508.796	545.028	516.398	570.238	516.835	493.949	514.878	509.209
660	592.456	542.104	576.155	530.049	490.728	529.863	456.128	582.819	522.225	453.024	536.105	456.5	446.486	428.211	464.419	478.813	456.312	551.926	502.093	493.524	516.608	471.147
661	611.299	533.845	513.248	558.507	506.404	517.655	559.153	537.667	544.621	445.644	465.75	478.194	470.156	487.476	486.263	480.058	534.221	522.501	451.291	421.964	482.508	470.388
662	673.819	534.286	570.775	492.64	561.999	525.706	521.565	547.935	511.087	473.672	544.526	510.728	473.97	516.113	530.128	473.078	487.59	549.844	507.589	549.518	437.273	503.702
663	625.608	593.272	548.35	574.01	545.749	506.735	506.746	590.558	559.216	451.563	536.326	525.263	469.612	394.279	481.022	549.211	519.71	605.663	479.773	534.716	479.109	514.676
664	633.513	549.755	546.597	470.794	537.665	528.007	530.28	529.704	559.747	512.725	523.734	551.476	468.798	477.009	536.564	546.966	580.331	626.072	537.708	543.09	530.457	547.086
665	679.981	530.678	630.443	532.61	565.51	545.345	571.484	622.606	506.08	516.916	519.243	536.72	515.664	528.313	571.519	492.297	523.75	541.537	552.851	486.408	517.446	476.108
666	614.397	564.903	616.295	499.753	480.876	534.21	518.758	588.207	583.963	529.906	534.277	516.643	488.105	512.424	569.819	545.193	516.588	603.418	555.348	496.544	501.235	510.18
667	715.698	573.66	577.556	525.316	583.32	597.848	516.012	546.544	511.079	487.05	547.129	489.039	525.387	599.802	536.361	585.614	562.733	612.579	505.462	499.77	556.47	549.974
668	675.424	673.676	515.495	611.758	610.539	506.787	542.214	588.886	553.178	640.315	517.82	577.931	536.034	643.449	522.672	558.792	589.888	583.661	495.33	587.552	513.522	561.088
669	641.463	608.555	580.491	509.152	587.049	580.953	537.716	582.524	655.632	575.102	530.994	624.126	556.705	545.559	552.14	566.075	572.534	554.465	552	505.813	566.28	568.512
670	720.477	591.609	567.542	552.127	560.554	618.074	640.065	626.823	641.217	503.718	570.333	593.312	513.125	552.464	544.673	580.361	570.91	641.017	650.058	563.678	515.312	631.706
671	677.045	606.483	662.878	661.06	583.846	605.516	587.543	702.871	577.753	674.801	568.477	620.051	621.73	561.962	592.147	481.713	514.884	661.294	614.103	596.977	595.07	614.219
672	697.928	539.529	582.807	573.851	561.154	615.979	611.984	662.767	580.892	667.234	602.327	623.508	687.42	658.649	636.563	612.543	636.291	641.363	593.99	648.242	566.822	658.516
673	783.212	650.926	595.359	631.726	566.429	584.114	526.268	760.408	669.79	625.665	643.84	591.089	553.309	621.372	654.911	562.075	549.858	740.161	631.117	655.552	596.503	577.669
674	829.451	645.24	660.669	616.261	552.593	577.525	614.382	705.016	630.343	619.728	635.272	642.864	627.067	612.556	555.705	689.424	626.653	661.685	617.025	592.897	558.273	590.274
675	808.584	593.083	664.46	702.55	677.35	682.882	617.546	716.568	754.12	670.213	591.819	757.03	612.798	630.628	600.395	589.477	592.509	710	662.34	637.422	618.107	613.46
676	853.408	610.429	710.281	733.771	665.955	631.987	708.208	678.627	667.021	638.102	646.961	659.177	668.756	719.307	711.271	652.314	627.478	683.982	668.141	660.243	643.805	651.28
677	757.596	728.36	722.439	786.042	689.876	645.391	633.274	705.645	678.505	679.498	670.881	675.658	634.195	698.359	641.5	622.937	666.555	642.011	631.656	687.031	649.821	595.651
678	877.321	763.898	720.277	665.008	633.905	647.066	634.235	772.155	639.224	660.607	649.666	690.311	708.095	653.954	637.897	676.426	637.528	736.152	703.102	600.863	677.221	723.621
679	846.62	652.051	617.591	659.32	705.299	633.573	664.447	728.86	708.044	753.758	677.405	708.339	734.369	726.488	673.224	583.761	640.081	799.13	609.928	722.63	666.251	686.701
680	174.899	127.209	119.532	122.357	93.2639	122.948	89.2334	117.805	99.1809	100.089	67.3481	102.273	100.507	92.4137	81.5137	94.9117	97.4593	95.1504	78.836	103.213	70.6304	84.2791
681	158.435	128.945	126.566	126.702	116.136	135.54	90.4026	92.2745	97.8553	120.668	81.8034	70.9258	118.405	85.4222	96.3069	96.2679	76.8148	115.777	99.1511	88.1234	79.8335	90.8905
682	141.527	128.053	106.489	136.633	128.632	96.1253	52.748	99.0602	82.6393	80.6768	91.22	91.222	83.7719	78.1719	94.8866	80.849	72.356	120.213	89.3179	100.518	103.253	106.117
683	154.549	116.001	132.896	116.381	122.175	150.304	92.9134	92.0829	97.716	109.964	103.716	78.4761	84.8708	79.2621	104.778	76.3744	121.411	102.119	67.9168	84.9108	93.3985	90.6536
684	142.786	140.074	132.022	104.001	104.263	98.842	117.135	90.597	90.606	77.1965	108.057	116.512	88.9654	91.8578	45.9869	63.1564	77.3298	103.564	100.502	91.818	83.2528	77.6755
685	122.165	130.682	122.486	82.6791	114.444	85.9486	84.1093	91.8807	109.185	78.355	54.8215	83.6425	64.0611	96.1502	87.458	52.4171	49.4106	93.2237	93.2311	61.1603	78.621	75.902
686	149.853	100.836	118.444	75.174	104.365	110.389	108.891	90.2556	90.3433	117.688	73.1618	99.515	85.6772	97.5449	79.7274	91.5283	67.8207	97.4432	94.5198	144.811	88.6444	91.6889
687	87.5863	119.743	102.491	105.522	108.638	70.6503	74.5754	97.3758	91.5775	107.351	80.0844	80.0717	92.8696	50.9315	83.7342	50.8349	53.7863	77.8523	83.7699	101.8	101.807	53.9134
688	162.768	159.948	103.915	139.74	95.223	107.426	93.709	158.58	101.856	111.91	72.1493	126.33	103.29	94.1545	84.9953	81.8507	93.9373	112.358	106.143	78.874	69.8181	81.9628
689	123.041	153.216	117.407	111.585	154.042	124.036	76.6221	106.246	100.305	92.0168	91.4744	88.5211	77.0805	92.4048	117.033	120.02	76.8103	89.3421	107.689	73.8687	70.8201	61.5631
690	137.057	140.242	109.962	94.8691	113.397	119.671	74.6179	110.899	108.001	87.1384	83.5076	77.3935	78.1925	103.075	106.289	78.0301	99.7796	103.182	81.1824	96.8575	81.2142	118.735
691	200.866	108.237	136.338	142.788	139.939	130.744	94.6727	106.303	109.593	97.8686	97.2869	97.3197	79.2981	114.205	126.817	66.5415	104.446	107.813	98.2065	110.946	130.038	107.815
692	153.72	125.557	163.579	166.983	113.607	145.365	137.695	107.858	82.621	96.0818	60.5415	111.556	102.908	122.429	77.1374	115.768	89.9104	90.0601	109.375	48.2409	67.5994	96.579
693	178.306	172.108	150.155	131.197	128.133	115.458	74.6945	83.7179	109.661	94.2826	93.8428	122.903	78.4057	120.964	84.7841	78.2685	114.041	91.4435	94.7245	127.323	111.144	84.9555
694	187.426	171.434	152.456	129.927	126.778	123.668	121.864	117.637	124.28	128.689	82.0226	108.035	86.2886	99.4973	99.331	112.473	86.042	82.8652	116.04	72.8649	102.839	89.5671
695	170.491	173.91	105.261	118.569	141.864	108.964	127.053	122.661	175.759	120.499	146.472	86.3262	87.5663	84.0995	90.6921	100.687	67.1818	121.003	73.9802	164.639	124.438	114.367
696	182.934	149.837	130.146	153.679	153.988	127.32	111.976	117.648	100.979	98.4646	101.249	127.985	78.6089	122.873	98.8358	98.7708	95.418	95.5251	85.2909	109.074	78.4387	126.273
697	141.731	165.49	148.923	142.322	146.086	115.475	110.107	129.561	102.509	89.588	106.147	116.232	110.885	83.1391	127.96	100.179	69.0733	135.061	83.0693	121.066	103.78	93.4847
698	164.356	140.516	99.5819	106.59	144.727	120.597	115.196	117.648	138.614	76.8969	107.72	58.9498	105.314	123.007	98.2741	77.058	77.0347	56.201	105.344	70.1729	94.765	98.4466
699	156.288	156.517	118.408	125.642	118.873	97.906	109.795	133.396	130.139	78.043	84.6937	91.4746	124.643	96.2612	85.4398	96.0079	106.611	81.9682	89.0481	81.9124	81.9213	82.0913
700	211.433	112.934	148.427	124.018	120.615	127.806	93.5202	106.874	82.1345	90.0102	89.5837	96.4181	79.5562	94.1137	75.8383	79.4336	86.6078	79.5181	72.2364	101.19	54.2071	97.7497

## Sheet: Sheet2
CONC(nm)	FI at 454nm	df	df/dfmax	calc	R^2			kd	sos					CONC(nm)	FI at 454nm	df
0	1036.54	0	0	0	0			68.4122	1.63229e+14					0	1036.54	0	653.861
50	1386.01	349.472	0.534475	0.422254	0.0125935									50	1386.01	349.472
100	1306.87	270.338	0.413448	0.593781	0.0325201									100	1306.87	270.338
150	1385.47	348.934	0.533652	0.686775	0.0234466									150	1385.47	348.934
200	1516.46	479.928	0.73399	0.745123	0.000123931									200	1516.46	479.928
250	1556.01	519.47	0.794465	0.785146	8.68471e-05									250	1556.01	519.47
300	1621.55	585.01	0.894701	0.814305	0.00646346									300	1621.55	585.01
350	1631.08	594.541	0.909277	0.836496	0.00529707									350	1631.08	594.541
400	1727.05	690.515	1.05606	0.853949	0.0408476
450	1642.14	605.601	0.926191	0.868035	0.00338214
500	1611.03	574.495	0.878619	0.879643	1.04893e-06
550	1686.57	650.034	0.994147	0.889374	0.0109773
600	1607.65	571.117	0.873453	0.89765	0.000585487
650	1578.08	541.549	0.828232	0.904773	0.00585852
700	1574.62	538.087	0.822937	0.910969	0.00774974
750	1622.98	586.446	0.896896	0.916409	0.00038074
800	1631.21	594.672	0.909476	0.921222	0.000137946
850	1680.45	643.91	0.984781	0.92551	0.00351299
900	1598.12	561.584	0.858873	0.929356	0.00496787
950	1643.14	606.607	0.92773	0.932825	2.59551e-05
1000	1690.4	653.861	1	0.935968	0.00410005
1050	1658.93	622.4	0.951883	0.938831	0.000170357
		dmpg	exp	calc
		0	0	0
		50	0.534475	0.422254																				y = (672.4941*x)/(78.7899 + x), Michaelis eq.
		100	0.413448	0.593781
		150	0.533652	0.686775
		200	0.73399	0.745123
		250	0.794465	0.785146
		300	0.894701	0.814305
		350	0.909277	0.836496
		400	1.05606	0.853949
		450	0.926191	0.868035
		500	0.878619	0.879643
		550	0.994147	0.889374
		600	0.873453	0.89765
		650	0.828232	0.904773
		700	0.822937	0.910969
		750	0.896896	0.916409
		800	0.909476	0.921222
		850	0.984781	0.92551
		900	0.858873	0.929356
		950	0.92773	0.932825
		1000	1	0.935968
		1050	0.951883	0.938831
		dmpg	exp	calc					CONC(nm) DMPG	F	Fitting	F454(POPS)										POPS	F454
		0	0	0					0	0	0	0										0	173
									10		8.28448	20
		100	0.413448	0.593781					50	349.472	155.692	14										10	193
		150	0.533652	0.686775					100	270.338	350.69	5										50	187
		200	0.73399	0.745123					150	348.934	456.589											100	164
		250	0.794465	0.785146					200	479.928	510.55	16										200	189
		300	0.894701	0.814305					250	519.47	540.093											500	177
		350	0.909277	0.836496					300	585.01	557.621
		450	0.926191	0.868035					350	594.541	568.751
		500	0.878619	0.879643					400	690.515	576.216
		600	0.873453	0.89765					450	605.601	581.447
		650	0.828232	0.904773					500	574.495	585.248	4
		700	0.822937	0.910969					550	650.034	588.093
		750	0.896896	0.916409					600	571.117	590.275
		800	0.909476	0.921222					650	541.549	591.984
		850	0.984781	0.92551					700	538.087	593.348
		900	0.858873	0.929356					750	586.446	594.452
		950	0.92773	0.932825					800	594.672	595.359
		1000	1	0.935968					850	643.91	596.113
		1050	0.951883	0.938831					900	561.584	596.746
									950	606.607	597.283
									1000	653.861	597.742	27
									1050	622.4	598.138				y = 602.0261*x*x/(7166.913+x*x)
