# Supplementary material for: Daptomycin forms a stable complex with phosphatidylglycerol for selective uptake to bacterial membrane
Source: eLife. 2025 Jun 2;13:RP93267. doi: 10.7554/eLife.93267 (PMC12129450; doi:10.7554/eLife.93267)
Supplement: Figure 5—source data 1. [file elife-93267-fig5-data1.xlsx]

## Sheet: Sheet1
##BLOCKS= 1
Plate:	Plate1	1.3	TimeFormat	Spectrum	Fluorescence	FALSE	Raw	FALSE	23			380	600	10			1	6	96		Manual	-1	Emission Sweep	365	6	Automatic			7	2		0
Wavelength	Temperature(¡C)	A1	A2	A3	A4	A5	A6	A7	A8	A9	A10	A11	A12	B1	B2	B3	B4	B5	B6	B7	B8	B9	B10	B11	B12	C1	C2	C3	C4	C5	C6	C7	C8	C9	C10	C11	C12	D1	D2	D3	D4	D5	D6	D7	D8	D9	D10	D11	D12
380	23.5
390	23.5
400	23.5
410	23.5
420	23.5
430	23.5
440	23.5
450	23.5
460	23.5
470	23.6
480	23.5
490	23.5
500	23.6
510	23.5
520	23.5
530	23.5
540	23.6
550	23.5
560	23.6
570	23.6
580	23.6
590	23.6
600	23.6
		A1	A2	A3	A4	A5	A6	A7	A8	A9	A10	A11	A12	B1	B2	B3	B4	B5	B6	B7	B8	B9	B10	B11	B12	C1	C2	C3	C4	C5	C6	C7	C8	C9	C10	C11	C12	D1	D2	D3	D4	D5	D6	D7	D8	D9	D10	D11	D12
~End
Original Filename: dapt sucess 2 c; Date Last Saved: 25/5/2023 5:16:09 PM
[truncated: 48 more columns]

## Sheet: Sheet2
Wavelength	H1	H2	H3	H4	H5	H6	Dap-DMPG	Dap-DMPG
380	2792.7	4701.04	15096.9	5267.42	9209.04	8539.16	1188.5	204.913
390	497.176	710.576	2156.37	922.858	1369.97	1231.22	1305.09	225.015
400	233.857	130.814	319.693	838.341	135.558	124.256	4396.3	757.982
410	318.844	166.981	336.621	1827.51	39.888	36.502	10116.2	1744.16
420	389.829	276.236	535.728	2886.53	33.603	30.515	16115.1	2778.46
430	392.998	377.042	655.245	3379.43	27.334	24.904	18951.7	3267.53
440	379.083	454.605	717.265	3444.58	22.89	30.415	20065.2	3459.51
450	320.887	491.825	715.129	3169.81	32.479	29.074	19311.9	3329.65
460	281.246	509.819	664.489	2693.48	31.386	27.85	17138.2	2954.87
470	219.814	436.231	521.858	2037.97	26.697	22.63	13395.5	2309.57
480	163.932	371.607	401.742	1480.84	20.436	18.429	10360.3	1786.27
490	125.105	301.816	307.396	1090.58	17.203	15.186	7688.2	1325.55
500	95.276	240.423	230.185	762.634	14.838	15.31	5631.33	970.919
510	75.418	192.922	180.568	558.642	14.934	12.807	4233.71	729.95
520	62.102	153.347	135.719	403.507	14.291	11.747	3101.98	534.824
530	50.387	121.599	107.371	291.993	12.39	12.22	2278.84	392.904
540	38.05	90.732	83.954	204.408	11.941	11.631	1622.98	279.824
550	33.491	68.734	66.092	142.973	13.282	11.595	1129.1	194.672
560	28.922	55.388	55.626	105.353	15.8	11.899	814.364	140.408
570	23.368	44.942	56.662	80.409	20.598	18.587	589.079	101.565
580	20.857	39.538	67.935	63.778	30.913	27.662	422.8	72.8966
590	23.041	47.734	107.309	62.213	59.959	50.573	293.736	50.6441
600	19.796	41.735	96.684	51.411	55.841	51.88	210.318	36.2617
